# Supplementary material
Source: MDPI journal article supplement (https://www.mdpi.com/2073-4352/13/11/1583)
Supplement: s1 [file s1]

# X-Ray Diffraction, Spectroscopy, Optical Properties, NPA, NBO, FMO, and Hirshfeld Surface Analyses of Two Newly Synthesized Piperidinium Ionic Liquids

Youness El Bakri <sup>1,\*</sup>, Shaaban K. Mohamed <sup>2,\*</sup>, Atazaz Ahsin <sup>3</sup>, Etify A. Bakhite <sup>4</sup>, Islam S. Marae <sup>4</sup>, Safiyyah A. H. Al-waleedy <sup>4</sup>, Joel T. Mague <sup>5</sup> and Rashad Al-Salahi <sup>6</sup>

<sup>1</sup> Department of Theoretical and Applied Chemistry, South Ural State University, Lenin Prospect 76, Chelyabinsk, 454080, Russia

<sup>2</sup> Chemistry and Environmental Division, Manchester Metropolitan University, Manchester M1 5GD, UK

<sup>3</sup> Beijing National Laboratory for Molecular Sciences, Institute of Chemistry, Chinese Academy of Sciences, Beijing 100190, China; ahsin@iccas.ac.cn

<sup>4</sup> Chemistry Department, Faculty of Science, Assiut University, Assiut 71516, Egypt; betiafy@yahoo.com (E.A.B.); esllamsalem@aun.edu.eg (I.S.M.)

<sup>5</sup> Department of Chemistry, Tulane University, New Orleans, LA 70118, USA; joelt@tulane.edu

<sup>6</sup> Department of Pharmaceutical Chemistry, College of Pharmacy, King Saud University, Riyadh 11451, Saudi Arabia; ralsalahi@ksu.edu.sa

\* Correspondence: yns.elbakri@gmail.com (Y.E.B.); shaabankamel@yahoo.com (S.K.M.)

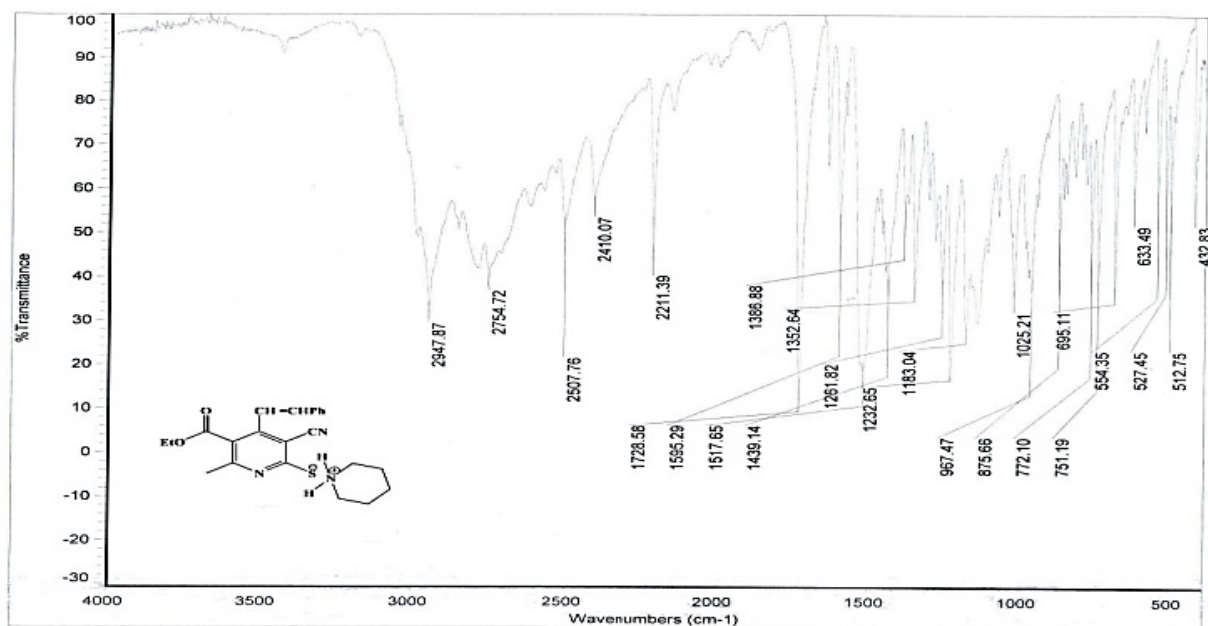

Figure S1. IR spectrum of 4a.

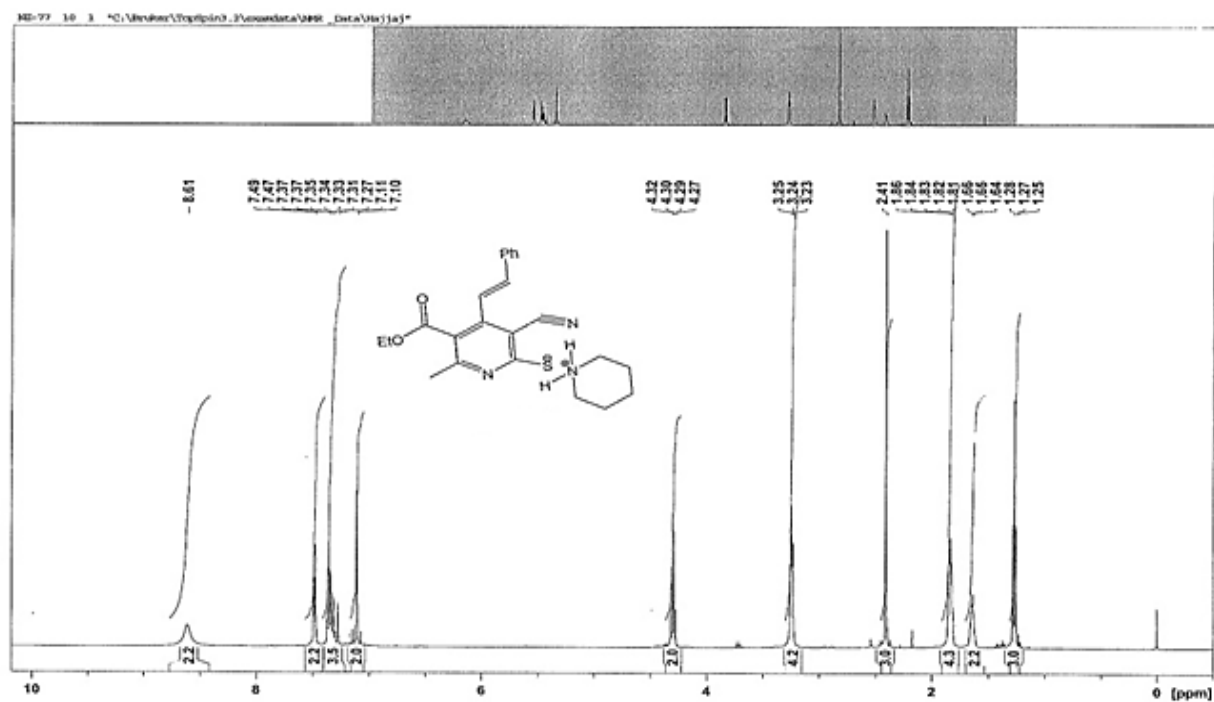

Figure S2.  $^1\text{H}$  NMR spectra of 4a.

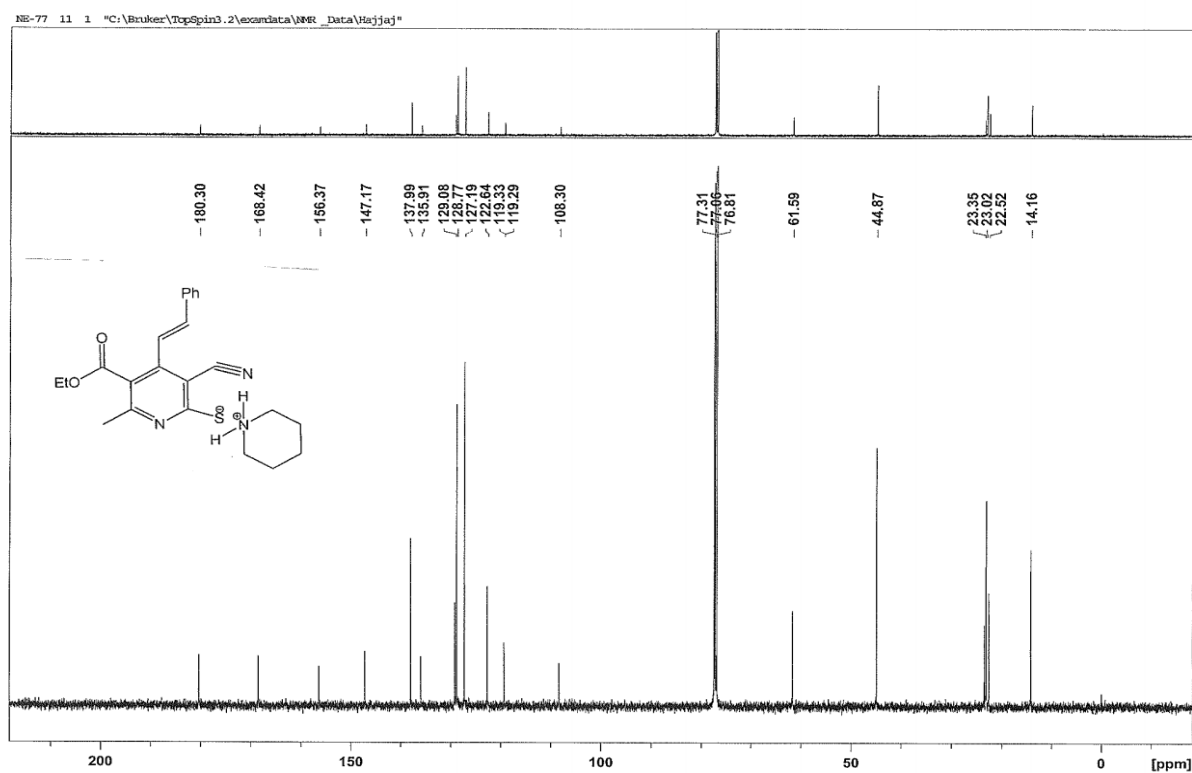

Figure S3.  $^{13}\text{C}$  NMR spectra of 4a.

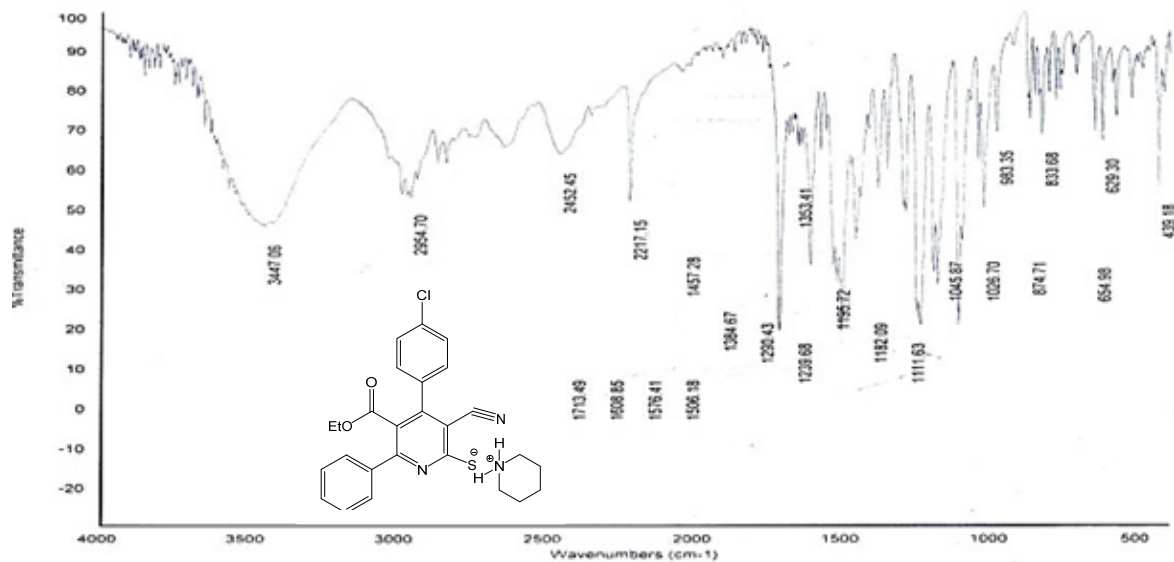

Figure S4. IR spectrum of 4b

SH-8  
proton\_su CDC13 {C:\nmr-data} Student 23

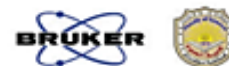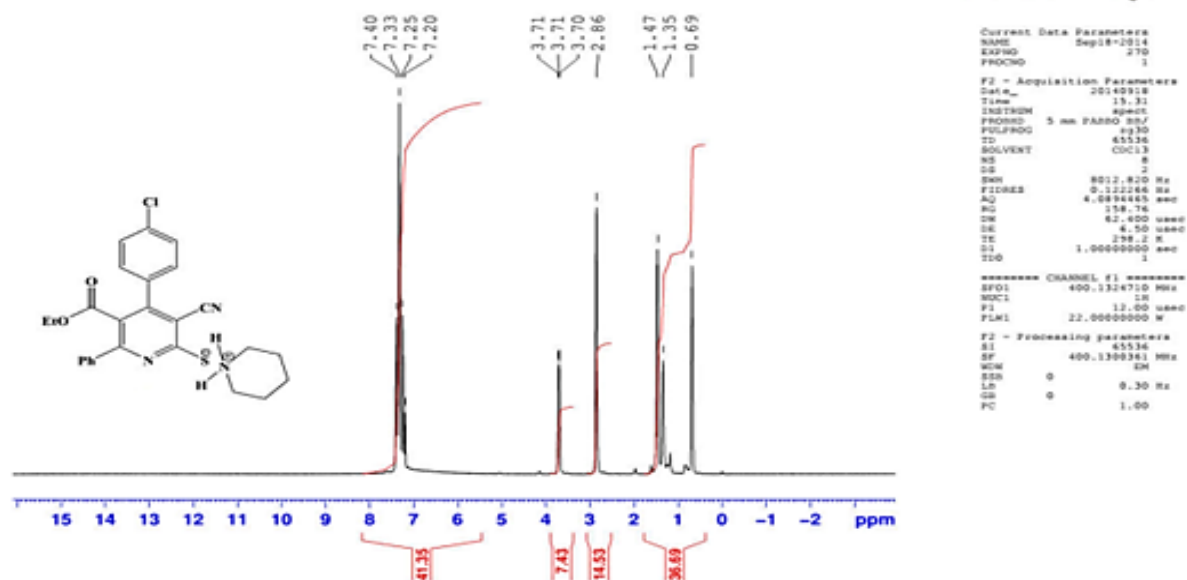

Figure S5.  $^1\text{H}$  NMR spectra of 4b.

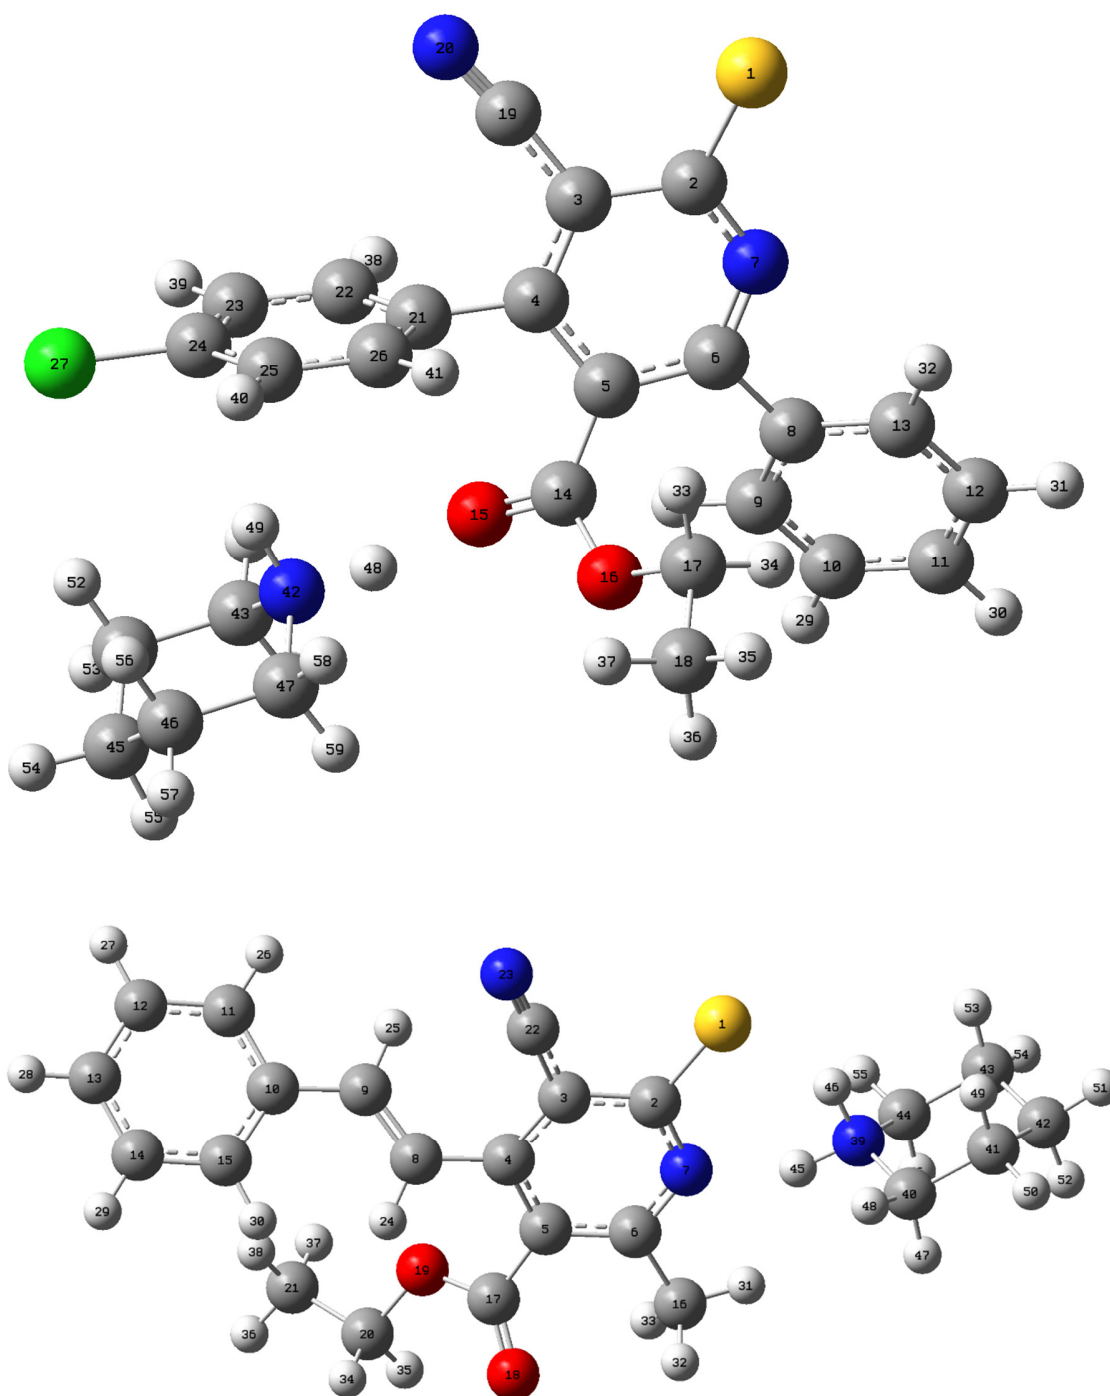

**Figure S6.** Labeled geometry of compound **4a** and **4b**.

**Table S1.** Total electronic energy (EE), zero-point correction (ZPE), enthalpy, and free energy of **4a** and **4b**; units are in Hartree

| Thermal parameters | <b>4a</b> | <b>4b</b> |
|--------------------|-----------|-----------|
|--------------------|-----------|-----------|

|                            |              |              |
|----------------------------|--------------|--------------|
| Electronic Energy          | -2179.571398 | -1605.685199 |
| ZPE                        | 0.472260     | 0.462140     |
| Enthalpy ( $\Delta H$ )    | -2179.066572 | -1605.192886 |
| Free energy ( $\Delta G$ ) | -2179.167935 | -1605.288717 |

**Table S2.** Optimized coordinated of 4a and 4b at the B3LYP/6-31+G(d,p).

| <b>4a</b>  |            |             |            | <b>4b</b> |             |             |             |
|------------|------------|-------------|------------|-----------|-------------|-------------|-------------|
| S          | 4.09377300 | 3.72088500  | 0.39873500 | S         | 2.57059700  | -2.27107900 | 0.16249100  |
| C          | 3.10527600 | 2.41889000  |            | C         | 1.49620000  | -0.92672200 | -0.01184600 |
| 0.00740800 |            |             |            | C         | 0.07866600  | -1.12084400 | -0.13255000 |
| C          | 1.65985300 | 2.54438900  | -          | C         | -0.79887200 | -0.02195000 | -0.23751600 |
| 0.14191000 |            |             |            | C         | -0.22451100 | 1.28049800  | -0.26245200 |
| C          | 0.84934500 | 1.41221600  | -          | C         | 1.17710500  | 1.40877000  | -0.18898500 |
| 0.14760800 |            |             |            | N         | 1.98492800  | 0.34906100  | -0.05184700 |
| C          | 1.45587600 | 0.12333600  | -          | C         | -2.25094100 | -0.18389900 | -0.41437100 |
| 0.08249700 |            |             |            | C         | -3.03005900 | -1.09867000 | 0.19559900  |
| C          | 2.88689200 | 0.08562300  | -          | C         | -4.48016600 | -1.25696700 | 0.03242500  |
| 0.22293300 |            |             |            | C         | -5.14997100 | -2.18289700 | 0.85494500  |
| N          | 3.63684600 | 1.16820900  | -          | C         | -6.52806100 | -2.37652300 | 0.75277000  |
| 0.18045500 |            |             |            | C         | -7.26971600 | -1.64842000 | -0.18019300 |
| C          | 3.62566600 | -1.17344200 | -          | C         | -6.61859300 | -0.72914900 | -1.01191800 |
| 0.54254300 |            |             |            | C         | -5.24314200 | -0.53610100 | -0.90872100 |
| C          | 3.07305100 | -2.18157900 | -          | C         | 1.87736400  | 2.74777000  | -0.23337700 |
| 1.34985600 |            |             |            | C         | -1.04515300 | 2.52107000  | -0.35241300 |
| C          | 3.80844300 | -3.32834100 | -          | O         | -0.75637700 | 3.49521000  | -1.02953900 |
| 1.66012200 |            |             |            |           |             |             |             |
| C          | 5.10701600 | -3.48508600 | -          |           |             |             |             |
| 1.17002100 |            |             |            |           |             |             |             |
| C          | 5.67314000 | -2.47820300 | -          |           |             |             |             |
| 0.37992100 |            |             |            |           |             |             |             |

|            |             |             |   |   |             |             |             |
|------------|-------------|-------------|---|---|-------------|-------------|-------------|
| C          | 4.94371400  | -1.32984400 | - | O | -2.14274800 | 2.48546700  | 0.43596900  |
| 0.07601800 |             |             |   | C | -3.00828800 | 3.64855500  | 0.39562300  |
| C          | 0.60785500  | -1.05412700 |   | C | -4.16384300 | 3.39095200  | 1.34417900  |
| 0.06415000 |             |             |   | C | -0.40809300 | -2.46565300 | -0.20429300 |
| O          | -0.42143800 | -1.23313500 | - | N | -0.82065900 | -3.55308600 | -0.26901100 |
| 0.62027200 |             |             |   | H | -2.71274700 | 0.54617800  | -1.07144300 |
| O          | 0.85832200  | -2.00462300 |   | H | -2.57851700 | -1.78688200 | 0.90381000  |
| 0.98596100 |             |             |   | H | -4.57653600 | -2.75821000 | 1.57687300  |
| C          | 1.82236800  | -1.83370100 |   | H | -7.02017800 | -3.09838600 | 1.39814500  |
| 2.06185500 |             |             |   | H | -8.34201600 | -1.79820400 | -0.26561400 |
| C          | 1.34884800  | -2.67084400 |   | H | -7.18610300 | -0.16638800 | -1.74781200 |
| 3.23623700 |             |             |   | H | -4.75812900 | 0.17045100  | -1.57510900 |
| C          | 1.05306700  | 3.83968500  | - | H | 2.91714100  | 2.62582700  | 0.07893700  |
| 0.18565400 |             |             |   | H | 1.85211000  | 3.16589500  | -1.24389700 |
| N          | 0.48482600  | 4.85568500  | - | H | 1.39902900  | 3.48527100  | 0.41583700  |
| 0.24797800 |             |             |   | H | -3.34442400 | 3.79900800  | -0.63531300 |
| C          | -0.63723400 | 1.58947500  | - | H | -2.42403000 | 4.52723200  | 0.68545400  |
| 0.10536100 |             |             |   | H | -4.83936300 | 4.25297600  | 1.34048600  |
| C          | -1.36932400 | 1.82713800  | - | H | -3.80512000 | 3.23938500  | 2.36665000  |
| 1.27726600 |             |             |   | H | -4.73205900 | 2.50579900  | 1.04404300  |
| C          | -2.75090000 | 2.02222800  | - | N | 4.68363500  | -0.08673300 | 0.06447700  |
| 1.23729400 |             |             |   | C | 5.46139300  | 0.09364200  | -1.19303000 |
| C          | -3.40956500 | 1.97826100  | - | C | 6.77093500  | -0.69504500 | -1.13471100 |
| 0.00522200 |             |             |   | C | 7.58274600  | -0.33893900 | 0.12117200  |
| C          | -2.70326900 | 1.76562200  |   | C | 6.73582400  | -0.52481600 | 1.39050000  |
| 1.18045500 |             |             |   | C | 5.42701100  | 0.26280300  | 1.30666900  |
| C          | -1.31869700 | 1.57407900  |   | H | 3.73207900  | 0.39648200  | 0.01502600  |
| 1.11930900 |             |             |   |   |             |             |             |
| Cl         | -5.15660200 | 2.21825500  |   |   |             |             |             |
| 0.05557600 |             |             |   |   |             |             |             |
| H          | 2.07936900  | -2.06051300 | - |   |             |             |             |
| 1.76960600 |             |             |   |   |             |             |             |
| H          | 3.36995300  | -4.09183500 | - |   |             |             |             |
| 2.29662500 |             |             |   |   |             |             |             |

|            |             |             |   |   |            |             |             |
|------------|-------------|-------------|---|---|------------|-------------|-------------|
| H          | 5.67825200  | -4.37690600 | - | H | 4.27731500 | -1.07660000 | 0.12569600  |
| 1.41186900 |             |             |   | H | 5.65273000 | 1.16607900  | -1.31689400 |
| H          | 6.68775600  | -2.58490000 | - | H | 4.82100300 | -0.23841500 | -2.01437200 |
| 0.00671300 |             |             |   | H | 6.54192800 | -1.76852500 | -1.13857600 |
| H          | 5.38078700  | -0.53084900 |   | H | 7.34750100 | -0.49043600 | -2.04330800 |
| 0.51325100 |             |             |   | H | 8.48399900 | -0.95870100 | 0.17558200  |
| H          | 1.89027200  | -0.77270900 |   | H | 7.92163600 | 0.70480900  | 0.05566300  |
| 2.31654100 |             |             |   | H | 6.50407000 | -1.58842900 | 1.53143500  |
| H          | 2.79656800  | -2.17026900 |   | H | 7.28770900 | -0.19987800 | 2.27918700  |
| 1.70227300 |             |             |   | H | 4.76401100 | 0.04364600  | 2.14782900  |
| H          | 2.07535700  | -2.59443200 |   | H | 5.61808100 | 1.34238300  | 1.29002800  |
| 4.05185200 |             |             |   |   |            |             |             |
| H          | 1.25990400  | -3.72431700 |   |   |            |             |             |
| 2.95472900 |             |             |   |   |            |             |             |
| H          | 0.37930800  | -2.32428000 |   |   |            |             |             |
| 3.60813200 |             |             |   |   |            |             |             |
| H          | -0.85195800 | 1.86741300  | - |   |            |             |             |
| 2.23033300 |             |             |   |   |            |             |             |
| H          | -3.30727300 | 2.22491400  | - |   |            |             |             |
| 2.14627600 |             |             |   |   |            |             |             |
| H          | -3.21905400 | 1.78067800  |   |   |            |             |             |
| 2.13497100 |             |             |   |   |            |             |             |
| H          | -0.76110700 | 1.43596500  |   |   |            |             |             |
| 2.04104800 |             |             |   |   |            |             |             |
| N          | -2.97196100 | -1.48606500 | - |   |            |             |             |
| 0.20583600 |             |             |   |   |            |             |             |
| C          | -3.55314600 | -1.95431900 | - |   |            |             |             |
| 1.50936500 |             |             |   |   |            |             |             |
| C          | -5.07863700 | -2.00848200 | - |   |            |             |             |
| 1.43735600 |             |             |   |   |            |             |             |
| C          | -5.55393800 | -2.86495200 | - |   |            |             |             |
| 0.25263400 |             |             |   |   |            |             |             |
| C          | -4.92699600 | -2.37575400 |   |   |            |             |             |
| 1.06295500 |             |             |   |   |            |             |             |

|                               |                    |                    |          |
|-------------------------------|--------------------|--------------------|----------|
| <b>C</b><br><b>0.96723200</b> | <b>-3.40258600</b> | <b>-2.31611700</b> |          |
| <b>H</b><br><b>0.28599100</b> | <b>-1.90085800</b> | <b>-1.47493200</b> | <b>-</b> |
| <b>H</b><br><b>0.04920200</b> | <b>-3.23830200</b> | <b>-0.50570300</b> | <b>-</b> |
| <b>H</b><br><b>1.70057900</b> | <b>-3.12294000</b> | <b>-2.94236300</b> | <b>-</b> |
| <b>H</b><br><b>2.28127600</b> | <b>-3.19213600</b> | <b>-1.27152400</b> | <b>-</b> |
| <b>H</b><br><b>1.34468200</b> | <b>-5.47487200</b> | <b>-0.98856900</b> | <b>-</b> |
| <b>H</b><br><b>2.38429400</b> | <b>-5.45678400</b> | <b>-2.40776300</b> | <b>-</b> |
| <b>H</b><br><b>0.18134900</b> | <b>-6.64573300</b> | <b>-2.83457800</b> | <b>-</b> |
| <b>H</b><br><b>0.42313700</b> | <b>-5.27748100</b> | <b>-3.91446300</b> | <b>-</b> |
| <b>H</b><br><b>1.31306700</b> | <b>-5.31499300</b> | <b>-1.37929100</b> |          |
| <b>H</b><br><b>1.89393400</b> | <b>-5.19729200</b> | <b>-3.03574400</b> |          |
| <b>H</b><br><b>1.85741800</b> | <b>-2.94591500</b> | <b>-1.87737400</b> |          |
| <b>H</b><br><b>0.81841600</b> | <b>-2.96871600</b> | <b>-3.30980500</b> |          |
