# Supplementary material
Source: MDPI journal article supplement (https://www.mdpi.com/2073-4352/13/11/1583)
Supplement: s1 [file s1]

Archive with 5 entries (5 files):
- checkcif 4b.pdf
- checkcif_Compound 4a.pdf
- Compound 4a.cif
- Compound 4b.cif
- crystals-2655775-Supporting materials.pdf
