# Supplementary material
Source: MDPI journal article supplement (https://www.mdpi.com/2073-4352/13/11/1583)
Supplement: s1 [file s1 › Compound 4a.cif]

data_global
_audit_creation_method                  'APEX3 v2018.1-0'

_publ_requested_journal                 ?

_publ_contact_author_name               ?
_publ_contact_author_address            
;


;
_publ_contact_author_email              ?
_publ_contact_author_fax                ?
_publ_contact_author_phone              ?

_publ_section_title                     
;
Crystal structure of piperadin-1-ium [4-(4-chlorophenyl)-3-cyano-5-(
ethoxycarbonyl)-6-phenylpyridin-2-yl]sulfanide

;
_publ_section_abstract                  
;
In the crystal of the title compound, [C~5~H~12~N][C~21~H~14~ClN~2~O~2~S], 
the anions form chains along the <i>a</i>-axis direction by C---H...\p(ring) 
interactions. These are connected into layers approximately parallel to 
the <i>ac</i> plane by a variety of hydrogen bonds.
;

_publ_section_synopsis
;
In the crystal, the anions form chains along the <i>a</i>-axis direction by 
C---H...\p(ring) interactions. These are connected into layers approximately 
parallel to the <i>ac</i> plane by N---H...S, C---H...O, C---H...H and 
C---H...S hydrogen bonds.
;

_publ_section_keywords
;
Crystal structure; pyridine; hydrogen bond; sulfanide
;

_publ_section_references                
;
Brandenburg, K. & Putz, H. (2012). <i>DIAMOND</i>,
Crystal Impact GbR, Bonn, Germany.

Bruker (2016). <i>APEX3</i>, <i>SADABS</i>, <i>SAINT</i>
& <i>SHELXTL</i>, Madison, WI.

Krause, L., Herbst-Irmer, R., Sheldrick G.M. & Stalke D. (2015).  <i>J.
Appl. Cryst.</i> <b>48</b>,  3-10.

Sheldrick, G. M. (2015<i>a</i>). <i>SHELXT</i>. <i>Acta Cryst.</i>
A<b>71</b>, 3-8.

Sheldrick, G. M. (2015<i>b</i>). <i>SHELXL-2018/1</i>.
<i>Acta Cryst.</i> C<b>71</b>, 3-8.
;

_publ_manuscript_text
;
The phenyl and 4-chlorophenyl rings are inclined to the central pyridine 
ring by 49.98(4)\% and 62.34(4)\%, respectively. In the crystal, the anions 
form chains extending along the <i>a</i>-axis direction through inversion-
related C13---H13A...Cg2 interactions (Table 2 and Fig. 3) between the 
ethoxycarbonyl substituents and phenyl substituents on neighboring units. 
Thes are constructed into layers approximately parallel to the <i>ac</i> 
plane and two anions thick by intervening sets of cations through 
N3---H3A...S1 and N3---H3B...S1 hydrogen bonds assisted by C25---H25A...O2, 
C25---H25B...S1, C19---H19...O1 and C22---H22B...N2 hydrogen bonds (Table 2 
and Figs. 2 and 3).
;

_publ_section_exptl_refinement
;
Crystal and refinement details are presented in Table 1. Independent 
refinement of the hydrogens attached to C14 led to an unsatisfactory 
geometry for this methyl group so these were included as riding 
contributions in idealized positions.
;

_publ_section_exptl_prep
;

;

_publ_section_figure_captions
;
Figure 1. The title molecule with labeling scheme and 50% probability 
ellipsoids. 

Figure 2. End view of portions of two layers seen along the <i>a</i>-axis 
direction. N---H...S, C---H... O, C---H...N and C---H...S hydrogen bonds 
are shown, respectively, by lightviolet, black, light blue and gold dashed 
lines. The C---H...\p(ring) interactions are shown by green dashed lines.

Figure 3. Detail of the interionic interactions. N---H...S, C---H... O, 
C---H...N and C---H...S hydrogen bonds are shown, respectively, by light
violet, black, light blue and gold dashed lines. The C---H...\p(ring) 
interactions are shown by green dashed lines.
;


_publ_section_acknowledgements
;
JTM thanks Tulane University for support of the Tulane Crystallography 
Laboratory.
;
 
data_SKM268_0m_a
 
_audit_creation_method            'SHELXL-2018/1'
_shelx_SHELXL_version_number      '2018/1'
_chemical_name_systematic         
;
piperadin-1-ium [4-(4-chlorophenyl)-3-cyano-5-(ethoxycarbonyl)-6-
phenylpyridin-2-yl]sulfanide
;
_chemical_name_common             ?
_chemical_melting_point           ?
_chemical_formula_moiety          'C21 H14 Cl N2 O2 S, C5 H12 N'
_chemical_formula_sum
 'C26 H26 Cl N3 O2 S' 
_chemical_formula_weight          480.01

loop_
 _atom_type_symbol
 _atom_type_description
 _atom_type_scat_dispersion_real
 _atom_type_scat_dispersion_imag
 _atom_type_scat_source
 'C'  'C'   0.0033   0.0016
 'International Tables Vol C Tables 4.2.6.8 and 6.1.1.4'
 'H'  'H'   0.0000   0.0000
 'International Tables Vol C Tables 4.2.6.8 and 6.1.1.4'
 'N'  'N'   0.0061   0.0033
 'International Tables Vol C Tables 4.2.6.8 and 6.1.1.4'
 'O'  'O'   0.0106   0.0060
 'International Tables Vol C Tables 4.2.6.8 and 6.1.1.4'
 'S'  'S'   0.1246   0.1234
 'International Tables Vol C Tables 4.2.6.8 and 6.1.1.4'
 'Cl'  'Cl'   0.1484   0.1585
 'International Tables Vol C Tables 4.2.6.8 and 6.1.1.4'
 
_space_group_crystal_system       monoclinic
_space_group_IT_number            14
_space_group_name_H-M_alt         'P 21/c'
_space_group_name_Hall            '-P 2ybc'
 
_shelx_space_group_comment
;
The symmetry employed for this shelxl refinement is uniquely defined
by the following loop, which should always be used as a source of
symmetry information in preference to the above space-group names.
They are only intended as comments.
;
 
loop_
 _space_group_symop_operation_xyz
 'x, y, z'
 '-x, y+1/2, -z+1/2'
 '-x, -y, -z'
 'x, -y-1/2, z-1/2'
 
_cell_length_a                    7.6105(4)
_cell_length_b                    26.1975(14)
_cell_length_c                    12.2488(7)
_cell_angle_alpha                 90
_cell_angle_beta                  99.3570(10)
_cell_angle_gamma                 90
_cell_volume                      2409.6(2)
_cell_formula_units_Z             4
_cell_measurement_reflns_used     9932
_cell_measurement_theta_min       2.2929
_cell_measurement_theta_max       29.1199
_cell_measurement_temperature     120(2)

_exptl_crystal_description        plate
_exptl_crystal_colour             'light yellow'
_exptl_crystal_density_meas       ?
_exptl_crystal_density_method     'not measured'
_exptl_crystal_density_diffrn     1.323          
_exptl_crystal_F_000              1008
_exptl_transmission_factor_min    0.861
_exptl_transmission_factor_max    0.914
_exptl_crystal_size_max           0.214
_exptl_crystal_size_mid           0.196
_exptl_crystal_size_min           0.092
_exptl_absorpt_coefficient_mu     0.274
_shelx_estimated_absorpt_T_min    0.944
_shelx_estimated_absorpt_T_max    0.975
_exptl_absorpt_correction_type    multi-scan
_exptl_absorpt_process_details          
    '<i>SADABS</i> (Krause <i>et al.</i>, 2015)'
_exptl_absorpt_correction_T_min   0.92
_exptl_absorpt_correction_T_max   0.97

_exptl_special_details                  
;
The diffraction data were collected in three sets of 
363 frames (0.5\% width in \w) at \f = 0, 120 
and 240\%. A scan time of 60 sec/frame was used. 
; 

_diffrn_ambient_temperature       120(2)
_diffrn_radiation_wavelength      0.71073
_diffrn_radiation_type            MoK\a
_diffrn_source                    'fine-focus sealed tube'
_diffrn_radiation_monochromator   graphite

_diffrn_measurement_device_type   'Bruker Smart APEX CCD'
_diffrn_measurement_method        '\w scans'

_diffrn_detector_area_resol_mean  8.3333

_diffrn_reflns_number             22901
_diffrn_reflns_av_unetI/netI      0.0309
_diffrn_reflns_av_R_equivalents   0.0278
_diffrn_reflns_limit_h_min        -9
_diffrn_reflns_limit_h_max        10
_diffrn_reflns_limit_k_min        -34
_diffrn_reflns_limit_k_max        33
_diffrn_reflns_limit_l_min        -16
_diffrn_reflns_limit_l_max        16
_diffrn_reflns_theta_min          1.555
_diffrn_reflns_theta_max          29.157
_diffrn_reflns_theta_full         28.000
_diffrn_measured_fraction_theta_max   0.941
_diffrn_measured_fraction_theta_full  0.992
_diffrn_reflns_Laue_measured_fraction_max    0.941
_diffrn_reflns_Laue_measured_fraction_full   0.992
_diffrn_reflns_point_group_measured_fraction_max   0.941
_diffrn_reflns_point_group_measured_fraction_full  0.992
_reflns_number_total              6129
_reflns_number_gt                 4967
_reflns_threshold_expression      'I > 2\s(I)'
_reflns_Friedel_coverage          0.000
_reflns_Friedel_fraction_max      .
_reflns_Friedel_fraction_full     .
 
_reflns_special_details
;
 Reflections were merged by SHELXL according to the crystal
 class for the calculation of statistics and refinement.
 
 _reflns_Friedel_fraction is defined as the number of unique
 Friedel pairs measured divided by the number that would be
 possible theoretically, ignoring centric projections and
 systematic absences.
;
 
_computing_data_collection        '<i>APEX3</i> (Bruker, 2016)'
_computing_cell_refinement        '<i>SAINT</i> (Bruker, 2016)'
_computing_data_reduction         '<i>SAINT</i> (Bruker, 2016)'
_computing_structure_solution           
    '<i>SHELXT</i> (Sheldrick, 2015<i>a</i>)'
_computing_structure_refinement         
    '<i>SHELXL-2018/1</i> (Sheldrick, 2015<i>b</i>)'
_computing_molecular_graphics           
    '<i>DIAMOND</i> (Brandenburg & Putz, 2012)'
_computing_publication_material   '<i>SHELXTL</i> (Bruker, 2016)'

_refine_special_details                 
;
Refinement of F^2^ against ALL reflections.  The weighted R-factor wR and
goodness of fit S are based on F^2^, conventional R-factors R are based
on F, with F set to zero for negative F^2^. The threshold expression of
F^2^ > 2sigma(F^2^) is used only for calculating R-factors(gt) etc. and is
not relevant to the choice of reflections for refinement.  R-factors based
on F^2^ are statistically about twice as large as those based on F, and R-
factors based on ALL data will be even larger. Independent refinement of 
the hydrogens attached to C14 led to an unsatisfactory geometry for this 
methyl group so these were included as riding contributions in idealized 
positions.
;

_refine_ls_structure_factor_coef  Fsqd
_refine_ls_matrix_type            full
_refine_ls_weighting_scheme       calc
_refine_ls_weighting_details
'w=1/[\s^2^(Fo^2^)+(0.0632P)^2^+0.1494P] where P=(Fo^2^+2Fc^2^)/3'
_atom_sites_solution_primary      direct
_atom_sites_solution_secondary    difmap
_atom_sites_solution_hydrogens    mixed
_refine_ls_hydrogen_treatment     mixed
_refine_ls_extinction_method      none
_refine_ls_extinction_coef        .
_refine_ls_number_reflns          6129
_refine_ls_number_parameters      391
_refine_ls_number_restraints      0
_refine_ls_R_factor_all           0.0478
_refine_ls_R_factor_gt            0.0369
_refine_ls_wR_factor_ref          0.1047
_refine_ls_wR_factor_gt           0.1003
_refine_ls_goodness_of_fit_ref    1.093
_refine_ls_restrained_S_all       1.093
_refine_ls_shift/su_max           0.001
_refine_ls_shift/su_mean          0.000
 
loop_
 _atom_site_label
 _atom_site_type_symbol
 _atom_site_fract_x
 _atom_site_fract_y
 _atom_site_fract_z
 _atom_site_U_iso_or_equiv
 _atom_site_adp_type
 _atom_site_occupancy
 _atom_site_site_symmetry_order  
 _atom_site_calc_flag
 _atom_site_refinement_flags_posn
 _atom_site_refinement_flags_adp
 _atom_site_refinement_flags_occupancy
 _atom_site_disorder_assembly
 _atom_site_disorder_group
Cl1 Cl 1.01166(5) 0.47414(2) 0.32411(3) 0.02799(10) Uani 1 1 d . . . . .
S1 S 0.12273(4) 0.27643(2) 0.55791(3) 0.02029(10) Uani 1 1 d . . . . .
O1 O 0.66374(12) 0.47522(3) 0.75400(8) 0.0201(2) Uani 1 1 d . . . . .
O2 O 0.76356(12) 0.40292(3) 0.84290(8) 0.0198(2) Uani 1 1 d . . . . .
N1 N 0.27351(13) 0.33522(4) 0.72219(8) 0.0143(2) Uani 1 1 d . . . . .
N2 N 0.29265(16) 0.34097(5) 0.33598(9) 0.0235(3) Uani 1 1 d . . . . .
C1 C 0.38942(15) 0.37035(5) 0.76882(10) 0.0132(2) Uani 1 1 d . . . . .
C2 C 0.50903(15) 0.39589(5) 0.71063(10) 0.0135(2) Uani 1 1 d . . . . .
C3 C 0.49252(15) 0.38851(4) 0.59630(10) 0.0131(2) Uani 1 1 d . . . . .
H3A H 1.057(2) 0.2697(7) 0.3528(16) 0.039(5) Uiso 1 1 d . . . . .
H3B H 1.082(2) 0.2484(6) 0.2413(15) 0.035(5) Uiso 1 1 d . . . . .
C4 C 0.36098(15) 0.35461(5) 0.54728(9) 0.0136(2) Uani 1 1 d . . . . .
C5 C 0.26015(15) 0.32516(5) 0.61288(10) 0.0140(2) Uani 1 1 d . . . . .
C6 C 0.38142(15) 0.38181(5) 0.88683(10) 0.0141(2) Uani 1 1 d . . . . .
C7 C 0.38550(16) 0.43207(5) 0.92461(10) 0.0173(3) Uani 1 1 d . . . . .
H7 H 0.3912(18) 0.4607(5) 0.8730(12) 0.015(3) Uiso 1 1 d . . . . .
C8 C 0.37428(18) 0.44256(5) 1.03441(11) 0.0220(3) Uani 1 1 d . . . . .
H8 H 0.373(2) 0.4773(6) 1.0582(13) 0.026(4) Uiso 1 1 d . . . . .
C9 C 0.35843(19) 0.40302(6) 1.10734(11) 0.0237(3) Uani 1 1 d . . . . .
H9 H 0.350(2) 0.4107(6) 1.1845(13) 0.028(4) Uiso 1 1 d . . . . .
C10 C 0.35078(18) 0.35303(6) 1.06992(11) 0.0230(3) Uani 1 1 d . . . . .
H10 H 0.332(2) 0.3248(7) 1.1186(16) 0.044(5) Uiso 1 1 d . . . . .
C11 C 0.36129(17) 0.34234(5) 0.96028(10) 0.0180(3) Uani 1 1 d . . . . .
H11 H 0.3519(19) 0.3069(6) 0.9343(12) 0.022(4) Uiso 1 1 d . . . . .
C12 C 0.65144(15) 0.43015(5) 0.76973(10) 0.0143(2) Uani 1 1 d . . . . .
C13 C 0.9005(2) 0.42994(6) 0.91831(13) 0.0290(3) Uani 1 1 d . . . . .
H13A H 1.012(3) 0.4164(7) 0.8932(16) 0.045(5) Uiso 1 1 d . . . . .
H13B H 0.891(3) 0.4658(8) 0.9040(17) 0.048(5) Uiso 1 1 d . . . . .
C14 C 0.8810(2) 0.41715(10) 1.03275(14) 0.0523(5) Uani 1 1 d . . . . .
H14A H 0.763024 0.427794 1.046285 0.078 Uiso 1 1 calc R U . . .
H14B H 0.972905 0.434922 1.084274 0.078 Uiso 1 1 calc R U . . .
H14C H 0.894224 0.380214 1.043885 0.078 Uiso 1 1 calc R U . . .
C15 C 0.61899(16) 0.41202(5) 0.52963(10) 0.0140(2) Uani 1 1 d . . . . .
C16 C 0.80037(17) 0.40122(5) 0.55705(11) 0.0172(3) Uani 1 1 d . . . . .
H16 H 0.839(2) 0.3804(6) 0.6194(13) 0.022(4) Uiso 1 1 d . . . . .
C17 C 0.92127(17) 0.42027(5) 0.49382(11) 0.0198(3) Uani 1 1 d . . . . .
H17 H 1.043(2) 0.4121(6) 0.5101(12) 0.021(4) Uiso 1 1 d . . . . .
C18 C 0.85939(17) 0.45059(5) 0.40338(11) 0.0186(3) Uani 1 1 d . . . . .
C19 C 0.68073(18) 0.46251(5) 0.37563(11) 0.0207(3) Uani 1 1 d . . . . .
H19 H 0.636(2) 0.4827(6) 0.3145(14) 0.032(4) Uiso 1 1 d . . . . .
C20 C 0.56049(17) 0.44309(5) 0.43874(10) 0.0174(3) Uani 1 1 d . . . . .
H20 H 0.439(2) 0.4511(6) 0.4204(14) 0.031(4) Uiso 1 1 d . . . . .
C21 C 0.32720(16) 0.34685(5) 0.42988(10) 0.0164(2) Uani 1 1 d . . . . .
N3 N 1.00165(15) 0.25789(4) 0.28964(10) 0.0204(2) Uani 1 1 d . . . . .
C22 C 0.8852(2) 0.29953(6) 0.23519(13) 0.0286(3) Uani 1 1 d . . . . .
H22A H 0.837(2) 0.2876(7) 0.1577(15) 0.041(5) Uiso 1 1 d . . . . .
H22B H 0.967(2) 0.3294(6) 0.2358(13) 0.030(4) Uiso 1 1 d . . . . .
C23 C 0.7332(2) 0.31033(6) 0.29751(16) 0.0361(4) Uani 1 1 d . . . . .
H23A H 0.662(3) 0.3356(8) 0.2566(17) 0.056(6) Uiso 1 1 d . . . . .
H23B H 0.793(2) 0.3242(7) 0.3758(14) 0.036(5) Uiso 1 1 d . . . . .
C24 C 0.6276(2) 0.26167(7) 0.31090(19) 0.0416(4) Uani 1 1 d . . . . .
H24A H 0.573(3) 0.2499(8) 0.2339(19) 0.057(6) Uiso 1 1 d . . . . .
H24B H 0.532(3) 0.2676(8) 0.3495(18) 0.056(6) Uiso 1 1 d . . . . .
C25 C 0.7503(2) 0.22142(6) 0.36964(14) 0.0283(3) Uani 1 1 d . . . . .
H25A H 0.689(2) 0.1888(7) 0.3764(14) 0.037(5) Uiso 1 1 d . . . . .
H25B H 0.798(2) 0.2339(6) 0.4415(14) 0.031(4) Uiso 1 1 d . . . . .
C26 C 0.90126(19) 0.21027(5) 0.30722(13) 0.0233(3) Uani 1 1 d . . . . .
H26A H 0.855(2) 0.1998(7) 0.2328(15) 0.038(5) Uiso 1 1 d . . . . .
H26B H 0.989(2) 0.1867(7) 0.3458(15) 0.042(5) Uiso 1 1 d . . . . .
 
loop_
 _atom_site_aniso_label
 _atom_site_aniso_U_11
 _atom_site_aniso_U_22
 _atom_site_aniso_U_33
 _atom_site_aniso_U_23
 _atom_site_aniso_U_13
 _atom_site_aniso_U_12
Cl1 0.03016(19) 0.0330(2) 0.02474(19) 0.00120(14) 0.01608(14) -0.01002(14)
S1 0.02682(18) 0.02144(18) 0.01291(16) -0.00265(11) 0.00412(13) -0.01088(13)
O1 0.0215(5) 0.0168(5) 0.0222(5) 0.0010(4) 0.0042(4) -0.0036(4)
O2 0.0170(4) 0.0199(5) 0.0204(5) 0.0008(4) -0.0039(4) -0.0024(4)
N1 0.0148(5) 0.0168(5) 0.0116(5) -0.0002(4) 0.0029(4) -0.0015(4)
N2 0.0274(6) 0.0294(6) 0.0145(6) -0.0014(5) 0.0056(4) -0.0058(5)
C1 0.0130(5) 0.0147(6) 0.0119(6) 0.0010(4) 0.0021(4) 0.0009(4)
C2 0.0125(5) 0.0145(6) 0.0138(6) 0.0005(4) 0.0026(4) 0.0004(4)
C3 0.0121(5) 0.0138(6) 0.0138(6) 0.0017(4) 0.0037(4) 0.0024(4)
C4 0.0146(5) 0.0160(6) 0.0105(5) -0.0002(4) 0.0031(4) 0.0011(4)
C5 0.0137(5) 0.0159(6) 0.0125(6) -0.0002(4) 0.0027(4) 0.0005(4)
C6 0.0102(5) 0.0201(6) 0.0122(6) -0.0013(4) 0.0026(4) -0.0020(4)
C7 0.0149(6) 0.0207(6) 0.0173(6) -0.0014(5) 0.0055(5) -0.0033(5)
C8 0.0223(6) 0.0233(7) 0.0218(7) -0.0078(5) 0.0077(5) -0.0049(5)
C9 0.0248(7) 0.0344(8) 0.0129(6) -0.0050(5) 0.0063(5) -0.0063(6)
C10 0.0265(7) 0.0284(7) 0.0148(6) 0.0024(5) 0.0055(5) -0.0040(6)
C11 0.0188(6) 0.0201(7) 0.0155(6) 0.0000(5) 0.0038(5) -0.0029(5)
C12 0.0124(5) 0.0190(6) 0.0124(6) -0.0012(5) 0.0051(4) -0.0006(5)
C13 0.0217(7) 0.0314(8) 0.0291(8) -0.0017(6) -0.0098(6) -0.0067(6)
C14 0.0341(9) 0.0959(16) 0.0239(9) -0.0081(9) -0.0043(7) -0.0138(10)
C15 0.0158(6) 0.0151(6) 0.0121(5) -0.0010(4) 0.0052(4) -0.0010(5)
C16 0.0170(6) 0.0183(6) 0.0166(6) 0.0033(5) 0.0037(5) 0.0016(5)
C17 0.0158(6) 0.0228(7) 0.0218(7) 0.0003(5) 0.0063(5) 0.0007(5)
C18 0.0222(6) 0.0186(6) 0.0174(6) -0.0011(5) 0.0106(5) -0.0056(5)
C19 0.0258(7) 0.0209(7) 0.0158(6) 0.0046(5) 0.0042(5) -0.0021(5)
C20 0.0160(6) 0.0202(6) 0.0156(6) 0.0016(5) 0.0021(5) 0.0002(5)
C21 0.0158(6) 0.0182(6) 0.0163(6) 0.0007(5) 0.0055(5) -0.0026(5)
N3 0.0210(6) 0.0250(6) 0.0159(6) -0.0027(5) 0.0049(5) -0.0006(5)
C22 0.0332(8) 0.0263(8) 0.0236(7) 0.0021(6) -0.0030(6) -0.0003(6)
C23 0.0264(8) 0.0240(8) 0.0566(11) -0.0033(7) 0.0030(7) 0.0043(6)
C24 0.0203(8) 0.0300(9) 0.0745(14) -0.0066(9) 0.0075(8) 0.0006(6)
C25 0.0235(7) 0.0252(8) 0.0384(9) -0.0081(6) 0.0113(6) -0.0054(6)
C26 0.0222(7) 0.0209(7) 0.0275(8) -0.0060(6) 0.0058(6) -0.0013(5)
 
_geom_special_details
;
 All esds (except the esd in the dihedral angle between two l.s. planes)
 are estimated using the full covariance matrix.  The cell esds are taken
 into account individually in the estimation of esds in distances, angles
 and torsion angles; correlations between esds in cell parameters are only
 used when they are defined by crystal symmetry.  An approximate (isotropic)
 treatment of cell esds is used for estimating esds involving l.s. planes.
;
 
loop_
 _geom_bond_atom_site_label_1
 _geom_bond_atom_site_label_2
 _geom_bond_distance
 _geom_bond_site_symmetry_2
 _geom_bond_publ_flag
Cl1 C18 1.7414(12) . ?
S1 C5 1.7169(12) . ?
O1 C12 1.2024(15) . ?
O2 C12 1.3384(15) . ?
O2 C13 1.4586(16) . ?
N1 C1 1.3369(15) . ?
N1 C5 1.3521(15) . ?
N2 C21 1.1478(16) . ?
C1 C2 1.4126(16) . ?
C1 C6 1.4873(16) . ?
C2 C3 1.3990(16) . ?
C2 C12 1.4996(16) . ?
C3 C4 1.3986(17) . ?
C3 C15 1.4927(16) . ?
C4 C5 1.4248(16) . ?
C4 C21 1.4335(16) . ?
C6 C7 1.3943(18) . ?
C6 C11 1.3954(17) . ?
C7 C8 1.3890(18) . ?
C7 H7 0.986(14) . ?
C8 C9 1.386(2) . ?
C8 H8 0.957(16) . ?
C9 C10 1.386(2) . ?
C9 H9 0.978(16) . ?
C10 C11 1.3868(18) . ?
C10 H10 0.974(19) . ?
C11 H11 0.980(16) . ?
C13 C14 1.472(2) . ?
C13 H13A 1.01(2) . ?
C13 H13B 0.956(19) . ?
C14 H14A 0.9800 . ?
C14 H14B 0.9800 . ?
C14 H14C 0.9800 . ?
C15 C20 1.3925(17) . ?
C15 C16 1.3956(17) . ?
C16 C17 1.3882(18) . ?
C16 H16 0.945(16) . ?
C17 C18 1.3821(18) . ?
C17 H17 0.944(16) . ?
C18 C19 1.3826(19) . ?
C19 C20 1.3870(18) . ?
C19 H19 0.934(17) . ?
C20 H20 0.941(17) . ?
N3 C22 1.4927(18) . ?
N3 C26 1.4967(18) . ?
N3 H3A 0.875(19) . ?
N3 H3B 0.953(18) . ?
C22 C23 1.513(2) . ?
C22 H22A 1.010(18) . ?
C22 H22B 1.000(17) . ?
C23 C24 1.530(2) . ?
C23 H23A 0.95(2) . ?
C23 H23B 1.056(17) . ?
C24 C25 1.511(2) . ?
C24 H24A 1.01(2) . ?
C24 H24B 0.94(2) . ?
C25 C26 1.509(2) . ?
C25 H25A 0.983(18) . ?
C25 H25B 0.954(17) . ?
C26 H26A 0.963(18) . ?
C26 H26B 0.971(19) . ?
 
loop_
 _geom_angle_atom_site_label_1
 _geom_angle_atom_site_label_2
 _geom_angle_atom_site_label_3
 _geom_angle
 _geom_angle_site_symmetry_1
 _geom_angle_site_symmetry_3
 _geom_angle_publ_flag
C12 O2 C13 118.53(10) . . ?
C1 N1 C5 119.70(10) . . ?
N1 C1 C2 123.03(11) . . ?
N1 C1 C6 115.20(10) . . ?
C2 C1 C6 121.76(10) . . ?
C3 C2 C1 118.63(11) . . ?
C3 C2 C12 120.41(10) . . ?
C1 C2 C12 120.96(10) . . ?
C4 C3 C2 117.33(10) . . ?
C4 C3 C15 120.49(10) . . ?
C2 C3 C15 121.98(11) . . ?
C3 C4 C5 121.02(11) . . ?
C3 C4 C21 121.31(11) . . ?
C5 C4 C21 117.63(11) . . ?
N1 C5 C4 119.48(10) . . ?
N1 C5 S1 118.44(9) . . ?
C4 C5 S1 122.08(9) . . ?
C7 C6 C11 118.99(11) . . ?
C7 C6 C1 120.73(11) . . ?
C11 C6 C1 120.22(11) . . ?
C8 C7 C6 120.45(12) . . ?
C8 C7 H7 119.1(8) . . ?
C6 C7 H7 120.4(8) . . ?
C9 C8 C7 120.12(13) . . ?
C9 C8 H8 120.6(10) . . ?
C7 C8 H8 119.2(10) . . ?
C10 C9 C8 119.77(12) . . ?
C10 C9 H9 120.5(9) . . ?
C8 C9 H9 119.7(9) . . ?
C9 C10 C11 120.35(13) . . ?
C9 C10 H10 121.2(11) . . ?
C11 C10 H10 118.4(11) . . ?
C10 C11 C6 120.29(12) . . ?
C10 C11 H11 119.5(9) . . ?
C6 C11 H11 120.2(9) . . ?
O1 C12 O2 124.95(11) . . ?
O1 C12 C2 125.40(11) . . ?
O2 C12 C2 109.66(10) . . ?
O2 C13 C14 108.69(13) . . ?
O2 C13 H13A 100.6(11) . . ?
C14 C13 H13A 115.4(11) . . ?
O2 C13 H13B 109.6(12) . . ?
C14 C13 H13B 112.5(12) . . ?
H13A C13 H13B 109.3(16) . . ?
C13 C14 H14A 109.5 . . ?
C13 C14 H14B 109.5 . . ?
H14A C14 H14B 109.5 . . ?
C13 C14 H14C 109.5 . . ?
H14A C14 H14C 109.5 . . ?
H14B C14 H14C 109.5 . . ?
C20 C15 C16 119.08(11) . . ?
C20 C15 C3 121.86(11) . . ?
C16 C15 C3 119.03(11) . . ?
C17 C16 C15 120.81(12) . . ?
C17 C16 H16 120.9(9) . . ?
C15 C16 H16 118.3(9) . . ?
C18 C17 C16 118.91(12) . . ?
C18 C17 H17 119.7(9) . . ?
C16 C17 H17 121.3(9) . . ?
C17 C18 C19 121.35(11) . . ?
C17 C18 Cl1 118.66(10) . . ?
C19 C18 Cl1 119.99(10) . . ?
C18 C19 C20 119.45(12) . . ?
C18 C19 H19 122.6(10) . . ?
C20 C19 H19 117.9(10) . . ?
C19 C20 C15 120.39(12) . . ?
C19 C20 H20 119.9(10) . . ?
C15 C20 H20 119.7(10) . . ?
N2 C21 C4 177.10(13) . . ?
C22 N3 C26 113.16(11) . . ?
C22 N3 H3A 107.5(12) . . ?
C26 N3 H3A 110.5(12) . . ?
C22 N3 H3B 108.0(10) . . ?
C26 N3 H3B 105.5(10) . . ?
H3A N3 H3B 112.2(16) . . ?
N3 C22 C23 111.02(13) . . ?
N3 C22 H22A 107.1(10) . . ?
C23 C22 H22A 109.8(10) . . ?
N3 C22 H22B 104.1(9) . . ?
C23 C22 H22B 112.2(9) . . ?
H22A C22 H22B 112.3(14) . . ?
C22 C23 C24 110.87(14) . . ?
C22 C23 H23A 106.4(13) . . ?
C24 C23 H23A 112.0(13) . . ?
C22 C23 H23B 105.8(9) . . ?
C24 C23 H23B 110.1(10) . . ?
H23A C23 H23B 111.4(16) . . ?
C25 C24 C23 109.75(13) . . ?
C25 C24 H24A 110.9(12) . . ?
C23 C24 H24A 107.3(12) . . ?
C25 C24 H24B 110.0(13) . . ?
C23 C24 H24B 112.2(13) . . ?
H24A C24 H24B 106.6(17) . . ?
C26 C25 C24 110.88(14) . . ?
C26 C25 H25A 106.5(10) . . ?
C24 C25 H25A 112.5(10) . . ?
C26 C25 H25B 109.1(10) . . ?
C24 C25 H25B 108.2(10) . . ?
H25A C25 H25B 109.5(14) . . ?
N3 C26 C25 111.11(12) . . ?
N3 C26 H26A 102.6(11) . . ?
C25 C26 H26A 110.0(11) . . ?
N3 C26 H26B 105.9(11) . . ?
C25 C26 H26B 113.2(11) . . ?
H26A C26 H26B 113.4(14) . . ?
 
loop_
 _geom_torsion_atom_site_label_1
 _geom_torsion_atom_site_label_2
 _geom_torsion_atom_site_label_3
 _geom_torsion_atom_site_label_4
 _geom_torsion
 _geom_torsion_site_symmetry_1
 _geom_torsion_site_symmetry_2
 _geom_torsion_site_symmetry_3
 _geom_torsion_site_symmetry_4
 _geom_torsion_publ_flag
C5 N1 C1 C2 -4.08(17) . . . . ?
C5 N1 C1 C6 174.59(10) . . . . ?
N1 C1 C2 C3 7.43(18) . . . . ?
C6 C1 C2 C3 -171.15(11) . . . . ?
N1 C1 C2 C12 -172.39(11) . . . . ?
C6 C1 C2 C12 9.03(17) . . . . ?
C1 C2 C3 C4 -2.11(17) . . . . ?
C12 C2 C3 C4 177.71(11) . . . . ?
C1 C2 C3 C15 -176.93(11) . . . . ?
C12 C2 C3 C15 2.88(17) . . . . ?
C2 C3 C4 C5 -5.98(17) . . . . ?
C15 C3 C4 C5 168.93(11) . . . . ?
C2 C3 C4 C21 176.32(11) . . . . ?
C15 C3 C4 C21 -8.78(18) . . . . ?
C1 N1 C5 C4 -4.30(17) . . . . ?
C1 N1 C5 S1 175.01(9) . . . . ?
C3 C4 C5 N1 9.48(17) . . . . ?
C21 C4 C5 N1 -172.74(11) . . . . ?
C3 C4 C5 S1 -169.81(9) . . . . ?
C21 C4 C5 S1 7.97(16) . . . . ?
N1 C1 C6 C7 -135.19(12) . . . . ?
C2 C1 C6 C7 43.49(17) . . . . ?
N1 C1 C6 C11 41.80(16) . . . . ?
C2 C1 C6 C11 -139.51(12) . . . . ?
C11 C6 C7 C8 1.63(18) . . . . ?
C1 C6 C7 C8 178.67(11) . . . . ?
C6 C7 C8 C9 -0.17(19) . . . . ?
C7 C8 C9 C10 -1.1(2) . . . . ?
C8 C9 C10 C11 0.9(2) . . . . ?
C9 C10 C11 C6 0.6(2) . . . . ?
C7 C6 C11 C10 -1.86(18) . . . . ?
C1 C6 C11 C10 -178.91(11) . . . . ?
C13 O2 C12 O1 6.98(18) . . . . ?
C13 O2 C12 C2 -173.10(11) . . . . ?
C3 C2 C12 O1 62.81(17) . . . . ?
C1 C2 C12 O1 -117.37(14) . . . . ?
C3 C2 C12 O2 -117.11(12) . . . . ?
C1 C2 C12 O2 62.71(14) . . . . ?
C12 O2 C13 C14 123.05(15) . . . . ?
C4 C3 C15 C20 61.13(16) . . . . ?
C2 C3 C15 C20 -124.20(13) . . . . ?
C4 C3 C15 C16 -116.76(13) . . . . ?
C2 C3 C15 C16 57.90(16) . . . . ?
C20 C15 C16 C17 -1.17(19) . . . . ?
C3 C15 C16 C17 176.79(12) . . . . ?
C15 C16 C17 C18 0.5(2) . . . . ?
C16 C17 C18 C19 0.6(2) . . . . ?
C16 C17 C18 Cl1 -179.74(10) . . . . ?
C17 C18 C19 C20 -1.0(2) . . . . ?
Cl1 C18 C19 C20 179.34(10) . . . . ?
C18 C19 C20 C15 0.3(2) . . . . ?
C16 C15 C20 C19 0.76(19) . . . . ?
C3 C15 C20 C19 -177.14(12) . . . . ?
C26 N3 C22 C23 53.72(16) . . . . ?
N3 C22 C23 C24 -54.99(19) . . . . ?
C22 C23 C24 C25 57.3(2) . . . . ?
C23 C24 C25 C26 -57.7(2) . . . . ?
C22 N3 C26 C25 -54.12(16) . . . . ?
C24 C25 C26 N3 55.94(17) . . . . ?
 
loop_
 _geom_hbond_atom_site_label_D 
 _geom_hbond_atom_site_label_H 
 _geom_hbond_atom_site_label_A 
 _geom_hbond_distance_DH 
 _geom_hbond_distance_HA 
 _geom_hbond_distance_DA 
 _geom_hbond_angle_DHA 
 _geom_hbond_site_symmetry_A 
 _geom_hbond_publ_flag
N3 H3A S1  0.875(19) 2.486(19) 3.3011(12) 155.3(16) 1_655 yes
N3 H3B S1  0.953(18) 2.406(18) 3.2504(12) 147.6(14) 4_665 yes
C13 H13A Cg2 1.01(2) 2.87(2) 3.6702(17) 136.0(14) 1_655 yes
C19 H19 O1  0.934(17) 2.552(17) 3.2713(17) 134.2(13) 3_666 yes
C22 H22B N2  1.000(17) 2.597(17) 3.3280(19) 129.8(12) 1_655 yes
C25 H25A O2  0.983(18) 2.518(18) 3.2771(18) 133.9(13) 4_565 yes
C25 H25B S1  0.954(17) 2.870(18) 3.6474(16) 139.4(13) 1_655 yes
_iucr_geom_hbonds_special_details
;
Cg2 is the centroid of the C6...C11 benzene ring.
;

 
_refine_diff_density_max    0.420
_refine_diff_density_min   -0.223
_refine_diff_density_rms    0.058

_shelx_res_file
;
TITL SKM268_0m_a.res in P2(1)/c
    SKM268_0m_a.res
    created by SHELXL-2018/1 at 09:58:27 on 26-Oct-2018
REM Old TITL SKM268_0m in P2(1)/c
REM SHELXT solution in P2(1)/c
REM R1 0.123,  Rweak 0.004,  Alpha 0.020,  Orientation as input
REM Formula found by SHELXT:  C26 N3 O2 S2
CELL  0.71073   7.6105  26.1975  12.2488   90.000   99.357   90.000
ZERR    4.000   0.0004   0.0014   0.0007    0.000    0.001    0.000
LATT  1
SYMM -X, 1/2+Y, 1/2-Z
SFAC C H N O S Cl
UNIT 104 104 12 8 4 4
TEMP -153
SIZE 0.092 0.196 0.214
L.S. 5
CONF
EQIV $1 x+1, y, z
HTAB N3 S1_$1
EQIV $2 x+1, -y+1/2, z-1/2
HTAB N3 S1_$2
EQIV $3 -x+1, -y+1, -z+1
HTAB C19 O1_$3
HTAB C22 N2_$1
EQIV $4 x, -y+1/2, z-1/2
HTAB C25 O2_$4
HTAB C25 S1_$1
ACTA 56
BOND $H
LIST 4
MPLA C6 > C11
MPLA N1 C1 > C5
MPLA C15 > C20
FMAP 2
PLAN 5
WGHT    0.063200    0.149400
FVAR       0.49352
CL1   6    1.011662    0.474143    0.324108    11.00000    0.03016    0.03296 =
         0.02474    0.00120    0.01608   -0.01002
S1    5    0.122728    0.276428    0.557908    11.00000    0.02682    0.02144 =
         0.01291   -0.00265    0.00412   -0.01088
O1    4    0.663742    0.475217    0.754002    11.00000    0.02153    0.01678 =
         0.02221    0.00100    0.00417   -0.00363
O2    4    0.763560    0.402924    0.842895    11.00000    0.01697    0.01988 =
         0.02037    0.00079   -0.00389   -0.00240
N1    3    0.273512    0.335222    0.722188    11.00000    0.01485    0.01676 =
         0.01157   -0.00021    0.00285   -0.00153
N2    3    0.292646    0.340974    0.335975    11.00000    0.02743    0.02940 =
         0.01450   -0.00138    0.00555   -0.00581
C1    1    0.389415    0.370349    0.768815    11.00000    0.01299    0.01472 =
         0.01187    0.00100    0.00207    0.00091
C2    1    0.509033    0.395893    0.710628    11.00000    0.01245    0.01453 =
         0.01382    0.00050    0.00264    0.00035
C3    1    0.492522    0.388510    0.596299    11.00000    0.01212    0.01383 =
         0.01381    0.00170    0.00368    0.00244
H3A   2    1.056664    0.269701    0.352842    11.00000    0.03940
H3B   2    1.082324    0.248381    0.241309    11.00000    0.03478
C4    1    0.360979    0.354606    0.547282    11.00000    0.01461    0.01599 =
         0.01050   -0.00018    0.00306    0.00114
C5    1    0.260147    0.325156    0.612878    11.00000    0.01370    0.01588 =
         0.01252   -0.00018    0.00267    0.00054
C6    1    0.381415    0.381806    0.886828    11.00000    0.01023    0.02006 =
         0.01217   -0.00128    0.00257   -0.00201
C7    1    0.385499    0.432065    0.924607    11.00000    0.01486    0.02074 =
         0.01732   -0.00135    0.00555   -0.00329
H7    2    0.391201    0.460655    0.872963    11.00000    0.01462
C8    1    0.374285    0.442560    1.034413    11.00000    0.02227    0.02331 =
         0.02179   -0.00784    0.00770   -0.00495
H8    2    0.372919    0.477336    1.058167    11.00000    0.02645
C9    1    0.358426    0.403021    1.107344    11.00000    0.02481    0.03436 =
         0.01294   -0.00502    0.00627   -0.00632
H9    2    0.350437    0.410677    1.184501    11.00000    0.02817
C10   1    0.350780    0.353027    1.069918    11.00000    0.02647    0.02843 =
         0.01480    0.00245    0.00552   -0.00403
H10   2    0.332339    0.324782    1.118552    11.00000    0.04365
C11   1    0.361288    0.342335    0.960283    11.00000    0.01880    0.02007 =
         0.01548    0.00002    0.00379   -0.00295
H11   2    0.351928    0.306908    0.934306    11.00000    0.02153
C12   1    0.651441    0.430149    0.769730    11.00000    0.01240    0.01901 =
         0.01245   -0.00118    0.00505   -0.00059
C13   1    0.900528    0.429936    0.918308    11.00000    0.02168    0.03141 =
         0.02915   -0.00171   -0.00984   -0.00668
H13A  2    1.011837    0.416360    0.893186    11.00000    0.04498
H13B  2    0.891096    0.465802    0.903990    11.00000    0.04801
C14   1    0.881042    0.417148    1.032751    11.00000    0.03413    0.09585 =
         0.02386   -0.00813   -0.00431   -0.01379
AFIX 137
H14A  2    0.763024    0.427794    1.046285    11.00000   -1.50000
H14B  2    0.972905    0.434922    1.084274    11.00000   -1.50000
H14C  2    0.894224    0.380214    1.043885    11.00000   -1.50000
AFIX   0
C15   1    0.618992    0.412023    0.529630    11.00000    0.01575    0.01513 =
         0.01207   -0.00096    0.00517   -0.00101
C16   1    0.800374    0.401222    0.557046    11.00000    0.01703    0.01826 =
         0.01659    0.00333    0.00368    0.00165
H16   2    0.838519    0.380367    0.619394    11.00000    0.02169
C17   1    0.921265    0.420274    0.493822    11.00000    0.01575    0.02285 =
         0.02185    0.00029    0.00632    0.00068
H17   2    1.043437    0.412063    0.510066    11.00000    0.02148
C18   1    0.859387    0.450589    0.403376    11.00000    0.02222    0.01855 =
         0.01743   -0.00114    0.01063   -0.00563
C19   1    0.680727    0.462514    0.375627    11.00000    0.02582    0.02088 =
         0.01584    0.00459    0.00425   -0.00209
H19   2    0.636271    0.482695    0.314535    11.00000    0.03181
C20   1    0.560489    0.443092    0.438739    11.00000    0.01602    0.02024 =
         0.01563    0.00164    0.00207    0.00022
H20   2    0.438722    0.451141    0.420418    11.00000    0.03059
C21   1    0.327203    0.346855    0.429881    11.00000    0.01575    0.01824 =
         0.01631    0.00070    0.00550   -0.00258
N3    3    1.001648    0.257895    0.289644    11.00000    0.02105    0.02498 =
         0.01588   -0.00266    0.00494   -0.00063
C22   1    0.885152    0.299526    0.235194    11.00000    0.03322    0.02634 =
         0.02359    0.00213   -0.00304   -0.00029
H22A  2    0.836651    0.287649    0.157657    11.00000    0.04056
H22B  2    0.967116    0.329404    0.235789    11.00000    0.02969
C23   1    0.733168    0.310329    0.297509    11.00000    0.02644    0.02402 =
         0.05664   -0.00335    0.00299    0.00432
H23A  2    0.661955    0.335600    0.256580    11.00000    0.05622
H23B  2    0.792738    0.324174    0.375817    11.00000    0.03609
C24   1    0.627611    0.261665    0.310902    11.00000    0.02027    0.03003 =
         0.07449   -0.00659    0.00751    0.00059
H24A  2    0.573125    0.249866    0.233935    11.00000    0.05719
H24B  2    0.532348    0.267563    0.349468    11.00000    0.05633
C25   1    0.750286    0.221421    0.369640    11.00000    0.02350    0.02522 =
         0.03841   -0.00809    0.01126   -0.00541
H25A  2    0.689135    0.188811    0.376419    11.00000    0.03660
H25B  2    0.797940    0.233908    0.441488    11.00000    0.03141
C26   1    0.901257    0.210271    0.307218    11.00000    0.02217    0.02090 =
         0.02745   -0.00595    0.00577   -0.00129
H26A  2    0.854749    0.199807    0.232755    11.00000    0.03806
H26B  2    0.988537    0.186749    0.345832    11.00000    0.04247
HKLF 4


REM  SKM268_0m_a.res in P2(1)/c
REM R1 =  0.0369 for    4967 Fo > 4sig(Fo)  and  0.0478 for all    6129 data
REM    391 parameters refined using      0 restraints

END

WGHT      0.0632      0.1494

REM Highest difference peak  0.420,  deepest hole -0.223,  1-sigma level  0.058
Q1    1   0.1837  0.3052  0.5791  11.00000  0.05    0.38
Q2    1   0.6958  0.4091  0.5447  11.00000  0.05    0.38
Q3    1   0.9453  0.4953  0.2992  11.00000  0.05    0.37
Q4    1   0.4315  0.3889  0.7399  11.00000  0.05    0.36
Q5    1   0.5592  0.3991  0.5617  11.00000  0.05    0.36
;
_shelx_res_checksum   86217

_shelx_hkl_file
;
   1   0   0  162.58    5.80
  -1   0   0  174.98    5.80
   2   0   0  197.88    7.00
  -2   0   0  193.98    6.90
   3   0   0 5501.65  178.98
  -3   0   0 5407.86  178.88
   4   0   0 1445.46   48.10
  -4   0   0 1427.86   47.90
   5   0   0   18.80    2.20
  -5   0   0   17.30    2.00
  -6   0   0  144.29    6.50
   6   0   0  148.09    6.80
  -7   0   0   35.10    3.60
   7   0   0   26.30    3.60
  -8   0   0 1688.83   56.99
   8   0   0 1667.93   57.39
   9   0   0   61.59    6.60
  -9   0   0   66.89    6.00
   0  -1   0   -0.10    0.10
  -1  -1   0  205.38    7.00
  -1  -1   0  210.48    6.90
   1   1   0  205.48    7.10
  -1   1   0  208.58    7.00
  -2  -1   0 2586.54   84.49
   2  -1   0 2575.34   84.49
  -2  -1   0 2615.04   84.39
   2   1   0 2513.75   84.49
  -2   1   0 2562.94   84.39
   3  -1   0   89.49    4.20
  -3  -1   0  110.69    3.50
  -3  -1   0   95.59    4.10
  -3   1   0  101.09    4.10
   3   1   0  106.19    4.30
   4  -1   0  247.48    9.10
  -4  -1   0  250.17    9.00
  -4   1   0  238.38    8.90
   4   1   0  239.08    9.10
   5  -1   0  383.96   13.90
  -5  -1   0  378.66   13.70
  -5   1   0  375.16   13.70
   5   1   0  387.96   13.90
  -6  -1   0    1.90    1.90
   6  -1   0    3.00    2.00
  -6   1   0    7.50    2.00
   6   1   0    3.40    2.10
  -7  -1   0   -0.80    2.10
   7  -1   0    1.40    2.40
   7   1   0    1.60    2.50
  -7   1   0    1.10    2.20
  -8  -1   0   43.20    4.70
   8  -1   0   53.29    5.30
   8   1   0   52.89    5.90
  -8   1   0   54.99    5.30
   9  -1   0   62.69    7.20
  -9  -1   0   47.50    5.10
  -9   1   0   51.39    5.20
   9   1   0   48.70    5.60
   0  -2   0   53.89    2.00
   0   2   0   58.99    2.00
   0   2   0   58.79    2.00
  -1  -2   0  596.74   20.30
  -1  -2   0  619.74   20.20
   1  -2   0  616.44   20.20
   1   2   0  622.04   20.30
  -1   2   0  609.84   20.30
   2  -2   0 1434.26   46.20
  -2  -2   0 1393.06   46.50
  -2  -2   0 1449.15   46.30
   2  -2   0 1375.46   46.60
   2   2   0 1407.46   46.60
  -2   2   0 1401.16   46.60
  -3  -2   0  705.23   25.00
  -3  -2   0  794.92   24.60
   3  -2   0  758.82   25.10
   3   2   0  731.93   25.10
  -3   2   0  723.73   25.00
   4  -2   0    5.90    1.40
  -4  -2   0    8.20    0.80
  -4  -2   0    7.20    1.50
  -4   2   0    8.80    1.40
   4   2   0    8.80    1.50
   5  -2   0  509.85   18.20
  -5  -2   0  517.95   18.00
  -5   2   0  523.45   18.00
   5   2   0  505.45   18.20
  -6  -2   0  316.87   11.90
   6  -2   0  313.67   12.20
   6   2   0  318.47   12.20
  -6   2   0  312.67   11.90
  -7  -2   0   45.20    4.40
   7  -2   0   52.29    4.50
  -7   2   0   48.40    4.20
   7   2   0   41.30    4.40
  -8  -2   0   71.69    5.70
   8  -2   0   69.39    5.60
   8   2   0   69.19    5.80
  -8   2   0   61.69    5.20
  -9  -2   0    3.50    3.50
   9  -2   0    8.60    4.00
  -9   2   0    2.40    3.40
   9   2   0    8.40    4.10
   0  -3   0    0.70    0.40
   0   3   0    1.00    0.30
   0   3   0    1.20    0.30
   1  -3   0  569.64   18.30
  -1  -3   0  537.75   18.40
  -1  -3   0  559.44   18.40
  -1   3   0  563.34   18.40
  -1   3   0  547.55   18.50
   1   3   0  550.34   18.40
  -2  -3   0 5723.93  193.78
   2  -3   0 6118.79  194.18
  -2  -3   0 5926.31  194.58
   2  -3   0 5941.11  194.28
  -2   3   0 5961.30  194.28
   2   3   0 5847.22  193.88
  -3  -3   0    2.90    0.70
  -3  -3   0    1.60    0.90
   3  -3   0    2.70    0.30
   3  -3   0    1.60    1.00
   3   3   0    1.60    1.00
  -3   3   0    1.80    1.00
  -4  -3   0    6.30    1.30
  -4  -3   0    8.20    0.80
   4  -3   0    9.30    1.70
   4   3   0    7.80    1.50
  -4   3   0   10.20    1.50
   5  -3   0   -0.30    1.50
  -5  -3   0    0.20    1.40
  -5   3   0    0.40    1.40
   5   3   0   -2.20    1.60
   6  -3   0  580.24   20.70
  -6  -3   0  568.64   20.40
   6   3   0  586.34   20.70
  -6   3   0  576.64   20.50
  -7  -3   0    3.30    2.30
   7  -3   0    1.30    2.70
  -7   3   0   -0.80    2.20
   7   3   0    3.30    2.80
  -8  -3   0  110.59    6.80
   8  -3   0  103.19    7.10
  -8   3   0  106.09    6.50
   8   3   0  110.69    6.90
   9  -3   0   19.20    5.10
  -9  -3   0   29.10    4.70
  -9   3   0   24.20    4.30
   9   3   0   24.50    4.80
   0  -4   0  575.84   19.70
   0   4   0  615.04   19.60
   0   4   0  585.64   19.50
  -1  -4   0 8417.96  286.17
  -1  -4   0 8879.21  286.17
   1  -4   0 8684.13  286.17
   1   4   0 8752.52  285.87
  -1   4   0 8893.11  286.57
  -1   4   0 8665.33  286.27
  -2  -4   0 1402.26   46.00
   2  -4   0 1407.26   45.90
  -2  -4   0 1391.46   46.10
   2  -4   0 1395.36   46.20
   2   4   0 1373.56   46.10
  -2   4   0 1403.86   46.10
  -3  -4   0   14.50    1.50
  -3  -4   0   15.60    1.30
   3  -4   0   16.30    1.00
   3  -4   0   18.00    1.70
  -3   4   0   17.10    1.60
   3   4   0   15.10    1.70
   4  -4   0   27.80    2.30
  -4  -4   0   23.40    1.60
  -4  -4   0   21.30    2.10
  -4   4   0   22.80    2.30
   4   4   0   22.00    2.20
  -5  -4   0    5.50    1.60
   5  -4   0   12.50    2.00
  -5   4   0    5.40    1.60
   5   4   0    7.80    1.90
   6  -4   0   63.09    4.30
  -6  -4   0   61.49    4.00
   6   4   0   60.89    4.30
  -6   4   0   58.99    4.20
   7  -4   0  714.63   26.20
  -7  -4   0  747.53   25.90
  -7   4   0  720.73   25.90
   7   4   0  757.22   26.40
   8  -4   0    4.40    3.10
  -8  -4   0    8.70    3.00
  -8   4   0    1.60    3.20
   8   4   0    6.50    3.60
   9  -4   0  317.27   13.90
  -9  -4   0  309.27   13.60
  -9   4   0  298.97   13.20
   9   4   0  330.27   14.10
   0  -5   0    0.90    0.70
   0   5   0    0.30    0.50
   0   5   0    0.20    0.50
  -1  -5   0 9999.00  317.07
   1  -5   0 9574.94  317.37
  -1  -5   0 9347.37  317.47
  -1   5   0 9666.53  317.07
  -1   5   0 9819.52  317.37
   1   5   0 9551.04  317.37
   2  -5   0 3989.70  131.79
  -2  -5   0 3984.10  131.89
  -2  -5   0 3976.90  131.89
  -2   5   0 4085.69  131.99
   2   5   0 4082.29  131.99
  -3  -5   0    3.70    1.10
   3  -5   0    1.70    1.00
  -3  -5   0    2.80    0.80
   3  -5   0    3.60    0.60
  -3   5   0    1.60    1.10
   3   5   0    2.90    1.10
  -4  -5   0  494.45   16.50
   4  -5   0  485.55   17.10
   4  -5   0  510.55   16.10
  -4  -5   0  476.75   16.90
   4   5   0  464.45   17.10
  -4   5   0  487.55   17.00
   5  -5   0  147.09    6.50
  -5  -5   0  147.09    6.30
   5   5   0  150.08    6.70
  -5   5   0  160.58    6.40
   6  -5   0    2.50    2.10
  -6  -5   0    5.80    2.20
   6   5   0    4.40    2.20
  -6   5   0    2.90    1.90
   7  -5   0    0.80    2.80
  -7  -5   0    0.80    2.50
   7   5   0    2.10    2.90
  -7   5   0    0.30    2.50
  -8  -5   0  106.79    6.30
   8  -5   0  109.49    6.90
   8   5   0  108.39    6.90
  -8   5   0  100.59    6.40
  -9  -5   0   -2.30    3.70
   9  -5   0   -0.60    4.30
   9   5   0    3.50    4.00
  -9   5   0    1.70    4.00
   0  -6   0 2502.45   83.59
   0   6   0 2586.04   83.49
   0   6   0 2541.85   83.39
   1  -6   0  159.18    5.90
  -1  -6   0  172.98    6.00
  -1  -6   0  162.98    5.80
   1   6   0  161.58    5.90
  -1   6   0  165.68    5.80
  -1   6   0  168.98    5.90
  -2  -6   0 1485.75   49.50
   2  -6   0 1496.05   49.40
  -2  -6   0 1456.05   49.50
   2   6   0 1518.15   49.60
  -2   6   0 1538.55   49.60
  -2   6   0 1500.35   49.60
   3  -6   0 2264.37   72.69
  -3  -6   0 2217.28   72.89
   3  -6   0 2228.08   73.19
  -3  -6   0 2187.48   73.09
   3   6   0 2214.28   73.19
  -3   6   0 2173.98   73.09
  -4  -6   0  743.63   24.10
   4  -6   0  691.03   24.60
   4  -6   0  760.42   23.80
  -4  -6   0  696.83   24.50
   4   6   0  703.43   24.70
  -4   6   0  710.93   24.50
   5  -6   0   41.80    3.20
  -5  -6   0   38.70    3.00
   5   6   0   38.00    3.20
  -5   6   0   47.10    3.10
   6  -6   0  104.69    5.60
  -6  -6   0  103.39    5.30
  -6   6   0   95.29    5.20
   6   6   0  110.79    5.90
  -7  -6   0  172.88    7.70
   7  -6   0  170.78    8.10
  -7   6   0  163.48    7.70
   7   6   0  166.48    8.40
  -8  -6   0  110.19    6.70
   8  -6   0  102.59    6.80
   8   6   0   94.99    7.20
  -8   6   0   96.99    6.30
   9  -6   0    1.30    4.30
  -9  -6   0    4.40    4.00
  -9   6   0    0.30    3.90
   9   6   0    1.00    4.60
   0  -7   0   -0.50    0.80
   0   7   0    0.10    0.60
   0   7   0    0.90    0.70
   1  -7   0  221.08    7.70
  -1  -7   0  209.18    7.80
  -1  -7   0  217.08    7.60
  -1   7   0  216.78    7.70
   1   7   0  222.08    7.70
  -1   7   0  226.68    7.60
   2  -7   0   57.19    2.50
  -2  -7   0   53.69    2.50
  -2  -7   0   61.59    2.80
  -2   7   0   60.39    2.70
   2   7   0   54.29    2.60
   3  -7   0  648.54   21.30
  -3  -7   0  608.34   21.40
  -3  -7   0  630.24   21.60
   3  -7   0  655.43   21.70
  -3   7   0  650.93   21.60
   3   7   0  629.24   21.70
  -4  -7   0    3.00    1.00
   4  -7   0    3.80    0.90
   4  -7   0    2.80    1.40
  -4  -7   0    1.90    1.20
  -4   7   0    5.60    1.50
   4   7   0    4.70    1.60
  -5  -7   0  469.85   16.70
   5  -7   0  456.65   16.80
  -5   7   0  486.65   16.70
   5   7   0  466.05   16.90
  -6  -7   0  219.28    8.90
   6  -7   0  201.48    8.90
  -6   7   0  215.68    8.90
   6   7   0  221.88    9.20
  -7  -7   0    1.70    2.40
   7  -7   0    2.30    2.70
  -7   7   0    3.50    2.40
   7   7   0    4.70    2.80
   8  -7   0   11.90    3.50
  -8  -7   0   11.70    3.20
   8   7   0    8.70    4.00
  -8   7   0   10.40    3.50
  -9  -7   0   12.50    4.30
   9  -7   0    4.20    4.30
  -9   7   0   12.20    4.40
   9   7   0   12.10    4.50
   0  -8   0  424.66   14.80
   0   8   0  436.26   14.50
   0   8   0  434.26   14.60
  -1  -8   0  152.48    5.70
   1  -8   0  146.09    5.60
  -1   8   0  146.79    5.40
   1   8   0  147.59    5.50
  -1   8   0  154.98    5.50
   1   8   0  156.08    5.40
  -2  -8   0  622.54   21.40
  -2  -8   0  647.04   21.30
   2  -8   0  642.24   21.30
  -2   8   0  638.14   21.30
  -2   8   0  635.54   21.50
   2   8   0  617.34   21.40
  -3  -8   0   31.80    2.10
   3  -8   0   38.40    2.40
   3  -8   0   33.50    1.90
  -3  -8   0   28.60    2.20
  -3   8   0   34.40    2.20
   3   8   0   32.50    2.30
   4  -8   0  139.39    5.00
  -4  -8   0  138.09    5.20
  -4  -8   0  133.29    5.50
   4  -8   0  127.19    5.60
  -4   8   0  130.59    5.50
   4   8   0  120.49    5.70
  -5  -8   0  316.67   11.40
   5  -8   0  302.17   11.70
  -5  -8   0  311.27   11.00
  -5   8   0  315.67   11.50
   5   8   0  291.47   11.60
  -6  -8   0  419.26   14.80
   6  -8   0  387.36   15.00
   6   8   0  423.76   15.30
  -6   8   0  379.56   14.70
   7  -8   0   26.00    3.80
  -7  -8   0   22.20    3.20
  -7   8   0   21.70    3.20
   7   8   0   18.30    3.50
  -8  -8   0   44.20    4.60
   8  -8   0   36.20    4.70
  -8   8   0   42.50    4.70
   8   8   0   53.79    5.60
  -9  -8   0    5.70    3.70
   9  -8   0   -1.40    4.10
   9   8   0    2.90    4.30
  -9   8   0    4.60    4.20
   0  -9   0    0.70    0.90
   0   9   0    0.00    0.70
   0   9   0    0.00    0.70
   1  -9   0 2160.58   72.29
  -1  -9   0 2083.69   72.29
   1   9   0 2217.48   72.09
  -1   9   0 2220.38   72.19
  -1   9   0 2216.78   72.09
   1   9   0 2251.57   72.19
  -2  -9   0  352.76   12.40
   2  -9   0  362.86   12.30
  -2  -9   0  362.26   12.20
  -2   9   0  344.47   12.40
   2   9   0  352.66   12.40
  -2   9   0  351.66   12.30
   3  -9   0  323.67   11.30
   3  -9   0  339.57   11.70
  -3  -9   0  328.07   11.50
  -3  -9   0  316.07   11.50
  -3   9   0  343.57   11.60
   3   9   0  310.97   11.60
  -4  -9   0   57.79    2.90
   4  -9   0   53.39    2.60
  -4  -9   0   47.50    3.00
   4  -9   0   53.09    3.40
   4   9   0   52.99    3.30
  -4   9   0   57.39    3.30
  -5  -9   0   41.50    3.10
   5  -9   0   42.70    3.60
  -5  -9   0   39.70    2.80
   5   9   0   38.80    3.40
  -5   9   0   42.50    3.20
   6  -9   0   32.00    3.50
  -6  -9   0   23.60    2.90
   6   9   0   34.30    3.90
  -6   9   0   28.00    3.00
   7  -9   0   49.40    4.70
  -7  -9   0   53.29    4.40
   7   9   0   54.09    5.10
  -7   9   0   48.70    4.40
   8  -9   0   -0.60    3.20
  -8  -9   0   -0.10    2.80
   8   9   0    1.10    3.40
  -8   9   0    2.00    3.40
  -9  -9   0   25.70    4.50
   9  -9   0   22.10    5.30
  -9   9   0   31.30    4.80
   9   9   0   24.70    5.60
   0 -10   0  239.18    8.90
   0  10   0  259.77    8.70
   0  10   0  244.08    8.60
  -1 -10   0  420.16   14.60
   1 -10   0  413.36   14.60
   1  10   0  433.56   14.40
  -1  10   0  409.26   14.40
  -1  10   0  423.66   14.30
   1  10   0  427.46   14.30
  -2 -10   0    1.80    0.80
  -2 -10   0    2.00    1.10
   2 -10   0    0.80    1.00
  -2  10   0    4.10    1.00
  -2  10   0    1.50    1.10
   2  10   0    2.10    1.00
  -3 -10   0 1988.20   64.09
  -3 -10   0 1924.61   64.19
   3 -10   0 1970.00   63.99
  -3  10   0 1922.61   64.19
   3  10   0 1904.31   64.29
  -3  10   0 1915.61   64.29
   4 -10   0  317.07   11.20
  -4 -10   0  287.27   11.00
  -4 -10   0  300.47   10.90
   4 -10   0  299.07   10.60
   4  10   0  301.17   11.20
  -4  10   0  307.57   11.00
  -5 -10   0   53.59    3.70
  -5 -10   0   50.29    3.20
   5 -10   0   54.09    3.90
  -5  10   0   48.50    3.50
   5  10   0   52.49    4.10
  -6 -10   0  158.68    7.20
   6 -10   0  149.09    7.30
  -6  10   0  158.68    7.10
   6  10   0  163.98    7.50
   7 -10   0   85.09    5.90
  -7 -10   0  106.89    6.10
  -7  10   0   90.29    5.60
   7  10   0   97.39    6.70
  -8 -10   0   20.70    3.70
   8 -10   0   16.60    3.90
  -8  10   0   16.30    3.60
   8  10   0   19.60    4.10
   9 -10   0    3.40    4.80
  -9 -10   0    6.50    3.90
  -9  10   0    4.30    3.90
   9  10   0    7.00    4.60
   0 -11   0    0.30    1.00
   0  11   0    0.90    0.80
   0  11   0    0.40    0.80
  -1 -11   0 1852.11   62.39
   1 -11   0 1890.51   62.39
   1  11   0 1919.91   62.09
  -1  11   0 1876.31   62.19
  -1  11   0 1852.01   62.09
   1  11   0 1900.81   62.19
  -2 -11   0  458.95   16.00
  -2 -11   0  449.16   15.60
   2 -11   0  469.95   15.90
  -2  11   0  460.35   15.70
   2  11   0  447.96   15.80
  -2  11   0  461.15   15.90
  -3 -11   0  945.21   31.70
  -3 -11   0  967.80   31.90
   3 -11   0  945.81   31.70
  -3  11   0  936.01   32.00
  -3  11   0  943.51   31.80
   3  11   0  935.01   31.90
   4 -11   0  162.98    6.30
  -4 -11   0  166.88    6.60
  -4 -11   0  165.08    6.70
   4 -11   0  174.68    6.90
   4  11   0  154.28    6.90
  -4  11   0  171.48    6.80
   5 -11   0   34.70    3.30
  -5 -11   0   31.90    2.90
  -5 -11   0   36.40    3.00
   5  11   0   33.50    3.30
  -5  11   0   30.90    3.10
  -6 -11   0   19.90    2.80
   6 -11   0   19.80    3.30
  -6  11   0   20.30    3.00
   6  11   0   20.30    3.10
  -7 -11   0    2.50    2.80
   7 -11   0    1.30    2.70
  -7  11   0   -0.30    2.40
   7  11   0    1.00    2.90
  -8 -11   0    9.30    3.60
   8 -11   0   12.00    3.70
   8  11   0   10.30    4.20
  -8  11   0    5.90    3.30
  -9 -11   0    0.40    4.20
   9 -11   0   -1.20    4.10
   9  11   0    0.60    5.00
  -9  11   0    0.60    4.30
   0 -12   0  131.89    5.70
   0  12   0  146.99    5.30
   0  12   0  144.19    5.40
  -1 -12   0   41.80    2.70
   1 -12   0   35.70    2.50
  -1  12   0   42.60    2.30
   1  12   0   41.10    2.20
  -1  12   0   36.50    2.20
   1  12   0   40.30    2.30
  -2 -12   0  378.16   13.00
   2 -12   0  378.96   13.20
  -2 -12   0  367.26   13.30
  -2  12   0  375.76   13.10
   2  12   0  376.96   13.20
  -2  12   0  371.96   13.20
  -3 -12   0  418.56   15.00
   3 -12   0  430.16   15.00
  -3 -12   0  432.86   15.20
  -3  12   0  451.85   15.10
   3  12   0  434.86   15.20
  -3  12   0  417.76   15.20
  -4 -12   0  128.59    5.60
   4 -12   0  134.59    6.00
  -4 -12   0  147.09    5.80
   4 -12   0  131.69    5.40
  -4  12   0  143.19    5.80
   4  12   0  121.39    5.90
  -5 -12   0   11.20    1.90
   5 -12   0    9.40    2.40
  -5 -12   0    8.00    2.30
   5  12   0    8.90    2.20
  -5  12   0    9.10    2.10
  -6 -12   0   12.20    2.50
   6 -12   0   12.60    3.00
   6  12   0   11.60    2.80
  -6  12   0   13.40    2.80
  -7 -12   0   27.20    3.50
   7 -12   0   27.50    3.80
   7  12   0   30.40    4.30
  -7  12   0   23.80    3.50
  -8 -12   0    4.50    3.60
   8 -12   0    1.30    3.90
  -8  12   0    2.30    3.20
   8  12   0    7.30    4.20
   9 -12   0   23.10    5.10
  -9 -12   0   22.70    4.60
   9  12   0   22.60    5.90
  -9  12   0   15.60    4.50
   0 -13   0    0.60    1.20
   0  13   0    0.60    0.90
   0  13   0    0.20    1.00
  -1 -13   0  150.38    6.40
   1 -13   0  154.48    6.40
   1  13   0  157.48    6.10
   1  13   0  162.48    5.90
  -1  13   0  163.88    6.10
  -1  13   0  160.18    5.90
  -2 -13   0  351.46   12.80
   2 -13   0  346.57   12.70
   2  13   0  366.86   12.50
   2  13   0  355.06   12.70
  -2  13   0  367.86   12.50
  -2  13   0  355.26   12.70
  -3 -13   0   71.09    3.60
   3 -13   0   61.09    3.40
  -3 -13   0   61.89    3.30
   3  13   0   64.99    3.60
  -3  13   0   61.39    3.60
  -3  13   0   68.59    3.60
   4 -13   0   66.29    3.50
  -4 -13   0   62.99    3.50
  -4 -13   0   66.99    3.80
   4 -13   0   70.09    3.90
   4  13   0   58.99    3.70
  -4  13   0   68.59    3.90
   5 -13   0  244.68    9.90
  -5 -13   0  253.37    9.40
  -5 -13   0  230.88    9.40
  -5  13   0  238.18    9.50
   5  13   0  243.68    9.90
   6 -13   0  215.28    9.40
  -6 -13   0  211.28    9.00
   6  13   0  218.58    9.30
  -6  13   0  197.28    8.80
  -7 -13   0   45.00    4.50
   7 -13   0   44.10    4.80
  -7  13   0   43.40    4.50
   7  13   0   46.80    5.10
   8 -13   0   52.09    6.00
  -8 -13   0   51.29    5.40
  -8  13   0   45.80    4.80
   8  13   0   51.99    5.80
   9 -13   0    1.70    4.60
  -9 -13   0    2.60    4.60
   9  13   0    4.70    4.90
  -9  13   0    3.20    4.20
   0 -14   0   34.70    2.70
   0  14   0   40.90    2.30
   0  14   0   41.30    2.40
  -1 -14   0   32.60    2.60
   1 -14   0   24.40    2.40
   1  14   0   28.40    2.10
  -1  14   0   27.80    2.10
  -1  14   0   34.40    2.20
   1  14   0   30.00    2.20
   2 -14   0   11.00    1.70
  -2 -14   0   14.40    1.90
   2  14   0   15.90    1.60
  -2  14   0   13.50    1.70
  -2  14   0   15.10    1.70
   2  14   0   10.00    1.60
  -3 -14   0   41.40    3.10
   3 -14   0   37.40    2.80
  -3 -14   0   33.90    2.40
   3  14   0   32.60    2.70
  -3  14   0   37.50    2.90
  -3  14   0   41.30    2.90
   4 -14   0 2200.78   72.29
   4 -14   0 2183.38   71.89
  -4 -14   0 2166.68   71.99
  -4 -14   0 2103.79   72.19
   4  14   0 2199.38   72.29
  -4  14   0 2166.48   72.09
  -5 -14   0  165.88    7.20
  -5 -14   0  168.58    7.20
   5 -14   0  167.68    7.70
  -5  14   0  178.48    7.30
   5  14   0  169.78    7.60
  -6 -14   0  243.98    9.90
   6 -14   0  231.28   10.20
   6  14   0  257.57   10.20
  -6  14   0  212.88    9.60
   7 -14   0   27.40    4.20
  -7 -14   0   29.70    3.90
  -7  14   0   35.70    3.90
   7  14   0   31.70    4.60
   8 -14   0    0.80    3.60
  -8 -14   0    5.20    3.40
   8  14   0   -0.80    3.80
  -8  14   0    1.70    3.80
   9 -14   0   33.00    6.10
  -9 -14   0   62.09    6.10
   9  14   0   56.69    7.30
  -9  14   0   37.90    5.80
   0 -15   0    2.60    1.40
   0  15   0    1.80    1.10
   0  15   0   -0.20    1.10
   1 -15   0   49.99    3.40
  -1 -15   0   53.59    3.30
  -1  15   0   48.50    2.80
  -1  15   0   54.19    2.90
   1  15   0   53.79    3.00
   1  15   0   61.99    2.90
  -2 -15   0    3.70    1.60
   2 -15   0    4.80    1.60
   2  15   0    8.10    1.40
  -2  15   0    6.10    1.40
  -2  15   0    3.80    1.30
   2  15   0    5.90    1.40
  -3 -15   0    1.20    1.40
   3 -15   0    1.90    1.50
  -3 -15   0    2.90    1.70
  -3  15   0    2.30    1.40
  -3  15   0    1.90    1.50
   3  15   0    1.40    1.60
  -4 -15   0   10.90    2.00
  -4 -15   0    9.30    2.00
   4 -15   0   12.10    2.30
   4 -15   0   14.00    2.00
  -4  15   0   11.40    2.20
   4  15   0   13.50    2.40
  -5 -15   0   89.19    5.00
   5 -15   0   90.59    5.40
  -5 -15   0   97.59    5.20
  -5  15   0   93.59    5.00
   5  15   0   99.29    5.60
   6 -15   0  143.79    7.30
  -6 -15   0  152.18    7.30
   6  15   0  162.68    7.60
  -6  15   0  142.99    7.30
   7 -15   0   51.09    5.30
  -7 -15   0   56.09    5.40
  -7  15   0   60.59    5.50
   7  15   0   62.39    5.60
  -8 -15   0    3.00    3.40
   8 -15   0    4.50    3.90
  -8  15   0    2.00    3.40
   8  15   0    2.20    4.00
  -9 -15   0   14.60    5.20
   9  15   0   14.20    6.10
  -9  15   0   18.70    5.80
   0 -16   0 2170.28   74.09
   0  16   0 2282.37   73.79
   0  16   0 2233.38   73.59
  -1 -16   0  295.37   10.80
   1 -16   0  273.77   10.70
   1  16   0  282.07   10.40
  -1  16   0  283.07   10.40
   1  16   0  296.27   10.30
  -1  16   0  283.77   10.20
  -2 -16   0  222.48    9.00
   2 -16   0  224.78    8.90
   2  16   0  245.58    8.60
  -2  16   0  239.68    8.70
   2  16   0  230.28    8.80
  -2  16   0  227.48    8.80
  -3 -16   0  110.19    5.40
   3 -16   0  116.99    5.40
  -3 -16   0  113.39    5.10
  -3  16   0  119.59    5.50
  -3  16   0  131.09    5.40
   3  16   0  115.89    5.40
   4 -16   0   15.90    2.10
  -4 -16   0   23.00    2.40
  -4 -16   0   21.60    2.60
  -4  16   0   16.90    2.30
   4  16   0   15.60    2.50
   5 -16   0  121.29    6.20
  -5 -16   0  133.89    6.00
  -5 -16   0  131.49    6.20
  -5  16   0  116.39    6.20
   5  16   0  126.89    6.40
  -6 -16   0  134.29    6.60
   6 -16   0  130.39    7.20
   6  16   0  133.49    7.00
  -6  16   0  125.39    6.60
  -7 -16   0    4.00    2.90
   7 -16   0   -1.10    3.30
  -7  16   0   -0.70    2.70
   7  16   0   -0.40    3.50
   8 -16   0   14.60    4.70
  -8 -16   0   21.60    4.00
   8  16   0   15.80    4.50
  -8  16   0   18.10    4.00
  -9 -16   0  136.59    9.80
   9  16   0  139.29   11.10
   0 -17   0    6.60    1.70
   0  17   0    3.90    1.40
   1 -17   0  292.77   11.40
  -1 -17   0  292.67   11.50
  -1  17   0  303.87   11.20
   1  17   0  309.97   11.00
   1  17   0  316.97   11.20
  -1  17   0  320.17   11.00
   2 -17   0   14.40    2.10
  -2 -17   0   16.70    2.30
  -2  17   0   16.30    2.00
   2  17   0   14.80    2.00
   2  17   0   19.20    1.90
  -2  17   0   15.30    2.10
   3 -17   0  121.59    5.90
  -3 -17   0  141.19    6.10
  -3  17   0  125.59    5.70
   3  17   0  136.49    6.00
  -3  17   0  126.69    6.00
   3  17   0  128.39    5.60
  -4 -17   0  458.75   16.80
   4 -17   0  460.05   16.50
  -4 -17   0  470.45   16.50
  -4  17   0  449.86   16.50
  -4  17   0  450.55   16.90
   4  17   0  481.95   16.80
  -5 -17   0  124.09    6.20
  -5 -17   0  112.99    5.70
   5 -17   0  114.49    6.40
  -5  17   0  120.49    6.10
   5  17   0  123.29    6.60
  -6 -17   0  215.68    9.00
   6 -17   0  201.48    9.30
  -6  17   0  201.08    9.00
   6  17   0  216.68    9.80
   7 -17   0   13.50    3.60
  -7 -17   0   15.30    3.70
   7  17   0   20.20    4.00
  -7  17   0   15.30    3.30
  -8 -17   0   14.70    4.10
   8 -17   0   18.00    4.90
  -8  17   0   14.70    4.10
   8  17   0   16.90    5.20
  -9 -17   0   11.50    5.00
   9  17   0   12.60    6.30
   0 -18   0    9.60    2.00
   0  18   0    9.40    1.60
   0  18   0   11.60    1.70
  -1 -18   0  240.68    9.30
   1 -18   0  221.78    9.10
   1  18   0  232.68    8.60
  -1  18   0  229.98    8.70
   1  18   0  223.58    8.80
  -1  18   0  234.88    8.80
  -2 -18   0  169.58    7.10
   2 -18   0  152.58    6.90
   2  18   0  164.58    6.40
  -2  18   0  142.59    6.60
   2  18   0  167.38    6.70
  -2  18   0  160.38    6.40
   3 -18   0 1171.58   39.50
  -3 -18   0 1166.48   39.70
  -3  18   0 1176.58   39.30
  -3  18   0 1167.28   39.50
   3  18   0 1147.49   39.40
   3  18   0 1153.98   39.10
   4 -18   0   25.70    2.90
  -4 -18   0   24.20    3.10
  -4 -18   0   24.80    2.80
   4  18   0   29.80    3.20
  -4  18   0   29.00    2.90
  -4  18   0   21.60    2.80
  -5 -18   0  308.17   12.30
  -5 -18   0  301.67   12.00
   5 -18   0  312.57   12.50
  -5  18   0  307.37   12.10
   5  18   0  337.67   12.60
  -6 -18   0  123.79    6.50
   6 -18   0  108.39    6.40
   6  18   0  121.19    7.20
  -6  18   0   94.09    6.00
  -7 -18   0    3.90    3.50
   7 -18   0    4.30    3.40
   7  18   0    4.40    3.90
  -7  18   0    3.10    3.10
  -8 -18   0   43.90    5.20
   8 -18   0   35.50    5.80
   8  18   0   48.60    6.40
  -8  18   0   40.40    5.10
   0 -19   0    3.20    1.90
   0  19   0    1.80    1.40
   0  19   0    0.30    1.40
  -1 -19   0  436.96   16.20
   1 -19   0  447.26   16.20
  -1  19   0  450.35   15.50
  -1  19   0  428.06   15.70
   1  19   0  451.15   15.50
   1  19   0  434.66   15.60
   2 -19   0  185.08    7.50
  -2 -19   0  162.98    7.40
  -2  19   0  171.08    7.10
  -2  19   0  164.78    6.90
   2  19   0  171.48    6.80
   2  19   0  164.88    7.00
  -3 -19   0    6.60    2.20
   3 -19   0    7.00    2.30
   3  19   0    4.20    2.00
  -3  19   0    8.10    2.10
  -3  19   0    6.40    2.20
   3  19   0    3.20    1.70
  -4 -19   0   32.70    3.60
   4 -19   0   37.30    3.90
  -4  19   0   35.10    4.00
  -4  19   0   29.40    3.00
   4  19   0   34.40    3.60
  -5 -19   0    2.00    2.50
   5 -19   0    2.20    2.70
  -5 -19   0   -1.50    2.40
  -5  19   0    1.60    2.50
   5  19   0    1.30    2.50
   6 -19   0   83.39    5.80
  -6 -19   0   88.69    5.80
  -6  19   0   74.99    5.50
   6  19   0  101.89    6.80
  -7 -19   0  271.37   11.60
   7 -19   0  254.77   11.80
  -7  19   0  264.47   11.40
   7  19   0  269.57   12.00
   8 -19   0   54.79    6.40
  -8 -19   0   47.40    5.30
  -8  19   0   48.80    5.80
   8  19   0   52.79    9.80
   0 -20   0  136.69    6.80
   0  20   0  147.99    6.40
   0  20   0  167.78    6.30
   1 -20   0  474.15   17.40
  -1 -20   0  478.25   17.40
   1  20   0  478.15   16.90
  -1  20   0  485.15   16.70
  -1  20   0  464.35   16.90
   1  20   0  481.45   16.70
   2 -20   0   90.29    5.40
  -2 -20   0   93.89    5.30
   2  20   0   97.89    4.60
   2  20   0   90.29    4.80
  -2  20   0   93.89    4.90
  -2  20   0   95.69    4.70
  -3 -20   0   77.49    5.30
   3 -20   0   86.59    4.90
   3  20   0   75.19    4.60
   3  20   0   78.59    4.30
  -3  20   0   83.99    4.70
  -3  20   0   71.69    4.50
   4 -20   0    7.40    2.50
  -4 -20   0    5.50    2.40
  -4  20   0    4.20    2.30
   4  20   0    6.70    2.20
   4  20   0    7.10    2.60
  -4  20   0    9.70    2.70
   5 -20   0   -1.60    2.70
  -5 -20   0    0.10    2.50
  -5 -20   0    0.30    2.70
   5  20   0    0.50    2.80
  -5  20   0   -1.90    2.60
  -6 -20   0   16.40    3.40
   6 -20   0   19.80    3.60
  -6  20   0   17.30    3.30
   6  20   0   31.90    4.40
  -7 -20   0  129.09    7.80
   7 -20   0  130.99    8.60
  -7  20   0  137.49    8.10
   7  20   0  124.99    9.70
   8 -20   0   62.49    6.90
  -8  20   0   60.99    6.50
   0 -21   0    4.30    2.20
   0  21   0   -0.40    1.70
   0  21   0    0.80    1.70
  -1 -21   0    6.80    2.30
   1 -21   0    7.80    2.40
   1  21   0    5.80    1.80
  -1  21   0    6.20    2.00
  -1  21   0    8.00    2.00
   1  21   0    9.80    1.90
  -2 -21   0  674.23   24.80
   2 -21   0  706.03   24.70
  -2  21   0  701.33   24.10
   2  21   0  715.83   24.10
  -2  21   0  695.73   24.30
   2  21   0  694.93   24.30
   3 -21   0   91.29    5.60
  -3 -21   0   93.69    5.80
  -3  21   0   88.29    4.70
   3  21   0   85.89    4.80
   3  21   0   85.39    5.10
  -3  21   0   89.39    5.30
  -4 -21   0  123.59    6.50
   4 -21   0  134.69    6.50
   4  21   0  114.69    6.40
   4  21   0  112.79    6.00
  -4  21   0  118.69    6.30
  -4  21   0  120.59    6.20
  -5 -21   0   17.50    3.40
   5 -21   0   17.80    3.30
   5  21   0   21.30    3.70
  -5  21   0   18.00    3.00
   6 -21   0  109.59    7.40
  -6 -21   0  112.59    6.80
  -6  21   0  111.39    7.00
   6  21   0  127.69   11.00
   7 -21   0   19.70    4.60
  -7  21   0   10.10    4.20
   8 -21   0    3.70    4.80
  -8  21   0   10.90    4.60
   0 -22   0  142.99    7.10
   0  22   0  145.29    6.50
   0  22   0  153.98    6.30
  -1 -22   0    6.80    2.50
   1 -22   0   10.50    2.60
   1  22   0   11.00    2.10
   1  22   0   10.30    2.20
  -1  22   0   10.80    2.10
  -1  22   0   11.50    2.30
   2 -22   0  258.57   10.80
  -2 -22   0  259.27   11.00
   2  22   0  257.37   10.30
   2  22   0  269.77   10.10
  -2  22   0  266.97   10.10
  -2  22   0  258.17   10.40
   3 -22   0  512.95   18.50
  -3 -22   0  473.45   18.50
   3  22   0  500.85   17.80
   3  22   0  513.05   18.20
  -3  22   0  488.55   17.90
  -3  22   0  510.35   18.30
  -4 -22   0   60.19    5.00
   4 -22   0   68.79    5.00
   4  22   0   67.09    5.10
  -4  22   0   66.89    4.80
   4  22   0   60.49    4.50
  -4  22   0   62.69    5.20
  -5 -22   0    7.70    3.30
   5 -22   0    2.80    3.10
  -5  22   0    1.00    2.80
   5  22   0    4.00    3.00
   6 -22   0  146.39    8.40
  -6  22   0  141.29    7.50
   7 -22   0   13.20    4.30
  -7  22   0   12.30    4.20
  -8  22   0   -1.40    5.10
   0 -23   0    3.70    2.60
   0  23   0    1.30    2.00
   0  23   0    2.80    2.00
  -1 -23   0   -1.60    2.40
   1 -23   0   -0.10    2.60
   1  23   0    0.60    1.90
   1  23   0    1.60    2.10
  -1  23   0    2.20    2.00
  -1  23   0    0.80    2.00
  -2 -23   0   78.49    5.40
   2 -23   0   72.79    5.10
   2  23   0   74.39    4.70
  -2  23   0   75.39    4.80
   2  23   0   65.79    4.80
  -2  23   0   78.49    4.60
   3 -23   0  270.57   11.10
  -3 -23   0  258.27   11.20
  -3  23   0  266.87   10.50
  -3  23   0  275.37   11.00
   4 -23   0   88.79    5.50
  -4 -23   0   84.79    5.80
  -4  23   0   84.99    6.00
  -4  23   0   86.79    5.50
   5 -23   0  423.46   15.70
  -5 -23   0  400.06   15.90
  -5  23   0  381.16   15.30
   6 -23   0   42.80    5.10
  -6  23   0   43.00    4.80
   7 -23   0    5.60    4.80
  -7  23   0    4.70    4.20
   0 -24   0  429.56   16.20
   0  24   0  412.16   15.40
  -1 -24   0    7.00    2.90
   1 -24   0   12.30    3.00
  -1  24   0    6.30    2.40
  -2 -24   0   12.60    3.00
   2 -24   0   14.50    3.10
  -2  24   0   15.80    2.90
  -2  24   0   12.90    3.10
  -3 -24   0    4.60    3.10
   3 -24   0   -1.10    2.80
  -3  24   0    2.70    2.50
  -3  24   0    2.40    2.40
  -4 -24   0    6.30    3.00
   4 -24   0    8.30    3.10
  -4  24   0    4.40    2.80
  -4  24   0    2.80    3.00
  -5 -24   0   17.70    3.70
   5 -24   0   20.60    4.00
  -5  24   0   15.10    3.20
   6 -24   0  182.28    9.50
  -6  24   0  194.58   10.20
   7 -24   0    5.20    4.40
   0 -25   0    2.20    2.70
  -1 -25   0   15.70    3.60
   1 -25   0   13.00    3.20
  -2 -25   0   77.19    5.70
   2 -25   0   82.59    6.10
  -2  25   0   68.29    5.10
   3 -25   0  160.48    8.00
  -3 -25   0  150.18    8.10
  -3  25   0  166.18    8.00
  -4 -25   0   12.80    3.40
   4 -25   0   10.10    4.20
  -4  25   0   18.20    3.70
   5 -25   0   32.00    4.50
  -5 -25   0   34.20    4.50
   6 -25   0    3.50    4.20
   7 -25   0    2.30    4.50
   0 -26   0    1.90    3.10
   1 -26   0    3.80    3.30
  -1 -26   0    8.60    3.20
  -2 -26   0    5.60    3.40
   2 -26   0    5.70    3.00
   3 -26   0    0.10    3.10
  -3 -26   0    0.10    3.00
  -4 -26   0   86.49    6.40
   5 -26   0  147.99    8.60
  -5 -26   0  153.08    8.60
   6 -26   0   19.20    4.80
   7 -26   0   -5.40    6.00
   0 -27   0    1.00    2.90
  -1 -27   0   29.00    4.00
   1 -27   0   27.40    4.10
  -2 -27   0    5.60    3.20
   2 -27   0    5.10    3.50
  -3 -27   0   20.30    4.20
   3 -27   0   18.40    4.00
  -4 -27   0    5.00    3.90
  -5 -27   0   35.10    4.90
   0 -28   0    8.80    3.40
  -1 -28   0   -2.20    3.40
   1 -28   0    2.30    3.10
  -2 -28   0   12.20    4.10
   2 -28   0   13.20    3.60
  -3 -28   0   12.20    3.90
   3 -28   0    7.60    3.90
  -4 -28   0   23.50    4.80
  -5 -28   0   70.69    7.00
   0 -29   0    0.80    3.60
   1 -29   0    1.30    3.70
  -1 -29   0    4.20    3.50
  -2 -29   0    7.20    3.60
   2 -29   0    8.00    3.80
  -3 -29   0    4.50    4.20
   3 -29   0    2.50    3.50
  -4 -29   0   13.60    4.40
  -5 -29   0    5.20    4.30
   0 -30   0    6.70    3.60
   1 -30   0    2.80    3.60
  -1 -30   0    4.30    3.70
  -2 -30   0   17.00    4.30
   2 -30   0   11.20    4.40
   3 -30   0   -0.80    4.20
  -3 -30   0   -0.20    3.80
  -4 -30   0   23.90    5.40
  -5 -30   0   14.60    5.30
   0 -31   0    0.60    3.80
  -1 -31   0   22.10    5.10
   1 -31   0   13.10    4.30
  -2 -31   0   11.00    4.30
   2 -31   0    9.70    4.20
  -3 -31   0   76.79    8.10
   3 -31   0   72.69    7.20
  -4 -31   0   42.80    6.10
  -5 -31   0   46.10    6.70
   0 -32   0  122.69    8.60
  -1 -32   0    1.70    4.20
   1 -32   0    2.50    4.60
   2 -32   0   20.20    4.90
  -2 -32   0   24.20    5.20
   3 -32   0   87.29    8.60
  -3 -32   0   70.49    7.90
  -4 -32   0    4.40    4.90
   0 -33   0    3.00    5.00
  -1 -33   0    0.50    4.50
   1 -33   0    0.00    4.90
  -2 -33   0    0.70    5.20
   2 -33   0   -0.20    5.10
  -3 -33   0  212.98   17.40
   0 -34   0    3.60    4.90
   1 -34   0   14.40    5.30
  -1 -34   0   15.10    6.60
   2 -34   0   30.00    6.40
   3 -34   0  109.09    9.40
  -9   0   1   -1.70    3.60
   9   0  -1   -2.00    3.90
  -8   0   1   -1.80    2.60
   8   0  -1    0.10    2.90
   7   0  -1   -0.60    2.30
  -7   0   1   -0.70    2.40
   6   0  -1    0.60    2.10
  -6   0   1    1.40    1.80
  -5   0   1    0.70    1.40
   5   0  -1   -0.20    1.50
   4   0  -1    0.70    1.20
  -4   0   1    1.90    1.20
  -3   0   1    0.00    0.40
   3   0  -1   -0.10    0.90
  -3   0   1   -1.10    0.80
   2   0  -1    1.20    0.70
  -2   0   1    0.70    0.70
  -2   0   1    1.20    0.40
  -1   0   1    0.10    0.30
  -1   0   1    0.60    0.40
  -1   0   1    0.10    0.40
   0   0  -1    0.10    0.20
   0   0   1    0.10    0.20
   0   0   1   -0.40    0.20
   1   0   1   -1.00    0.50
  -1   0  -1    1.30    0.50
   1   0   1    0.30    0.30
  -2   0  -1    0.60    0.40
   2   0   1   -0.10    0.80
  -2   0  -1    1.20    0.70
  -3   0  -1   -0.50    0.40
   3   0   1    1.30    1.00
  -3   0  -1    0.50    0.90
   4   0   1    0.50    1.30
  -4   0  -1   -0.40    1.10
   5   0   1    0.10    1.50
  -5   0  -1   -0.40    1.30
   6   0   1   -0.50    2.00
  -6   0  -1    2.90    2.10
  -7   0  -1    0.40    2.20
   7   0   1    0.60    2.60
   8   0   1    0.00    3.00
  -8   0  -1    1.60    2.80
   9   0   1   -1.60    3.80
  -9   0  -1   -1.90    3.70
  -9  -1   1    1.70    3.40
   9  -1  -1    1.50    3.70
  -9   1   1    5.00    3.50
   9   1  -1    5.00    4.30
   8  -1  -1    2.00    2.90
  -8  -1   1    3.80    2.70
  -8   1   1    3.90    3.10
   8   1  -1    0.20    2.90
  -7  -1   1    3.70    2.20
   7  -1  -1    3.20    2.50
   7   1  -1    2.80    2.50
  -7   1   1    5.20    2.40
   6  -1  -1    1.10    1.90
  -6  -1   1   -0.70    1.70
  -6   1   1    0.50    1.80
   6   1  -1    0.40    1.90
  -5  -1   1   15.90    1.90
   5  -1  -1   17.20    2.20
  -5   1   1   16.40    2.00
   5   1  -1   18.20    2.20
   4  -1  -1   71.79    3.80
  -4  -1   1   84.49    3.80
  -4  -1   1   89.29    3.00
  -4   1   1   84.79    3.80
   4   1  -1   79.49    4.00
   3  -1  -1   12.10    1.40
   3  -1  -1   15.00    0.80
  -3  -1   1   14.20    1.50
  -3  -1   1   13.10    1.00
   3   1  -1    9.10    1.20
  -3   1   1   15.80    1.50
  -2  -1   1  389.46   13.80
  -2  -1   1  418.16   13.60
   2  -1  -1  412.16   13.90
  -2   1   1  418.56   13.50
  -2   1   1  401.96   13.80
  -1  -1   1    1.50    0.40
  -1  -1   1    1.70    0.50
  -1   1   1    1.30    0.50
  -1   1   1    1.90    0.50
   1   1  -1    1.60    0.40
  -1   1   1    1.80    0.40
   0  -1   1  566.74   18.70
   0  -1   1  556.84   18.60
   0   1   1  585.84   18.70
   0   1   1  560.54   18.70
   0   1  -1  565.84   18.70
   1  -1   1  652.13   21.90
  -1  -1  -1  677.53   21.80
   1  -1   1  666.43   21.70
  -1  -1  -1  672.13   21.70
  -1   1  -1  640.54   21.80
   1   1   1  648.94   21.90
   2  -1   1  104.59    3.60
  -2  -1  -1  101.89    4.00
  -2  -1  -1  109.79    3.70
   2  -1   1  107.59    4.10
   2   1   1  101.79    4.10
  -2   1  -1  102.09    4.00
   3  -1   1  206.48    7.70
  -3  -1  -1  210.18    7.60
  -3  -1  -1  217.38    7.00
   3   1   1  200.08    7.70
  -3   1  -1  199.98    7.50
  -4  -1  -1 1274.07   42.40
   4  -1   1 1291.17   42.60
   4   1   1 1261.67   42.60
  -4   1  -1 1247.08   42.40
   5  -1   1   36.10    3.10
  -5  -1  -1   33.30    2.80
   5   1   1   38.10    3.10
  -5   1  -1   40.60    2.90
  -6  -1  -1  302.87   11.40
   6  -1   1  312.37   11.80
   6   1   1  278.77   11.60
  -6   1  -1  294.87   11.40
  -7  -1  -1  389.96   14.80
   7  -1   1  410.16   15.50
  -7   1  -1  379.16   14.80
   7   1   1  399.26   15.30
   8  -1   1  203.78    9.80
  -8  -1  -1  194.58    9.20
   8   1   1  202.28    9.80
  -8   1  -1  207.48    9.30
   9  -1   1   28.50    5.30
  -9  -1  -1   20.20    4.10
   9   1   1   17.50    4.50
  -9   1  -1   21.90    4.20
  -9  -2   1   84.19    6.30
   9  -2  -1   83.09    6.90
  -9   2   1   73.09    6.90
   9   2  -1   73.59    7.40
   8  -2  -1  118.59    7.20
  -8  -2   1  126.79    6.90
   8   2  -1  134.09    7.80
  -8   2   1  128.79    6.90
  -7  -2   1  142.79    6.80
   7  -2  -1  142.89    7.10
   7   2  -1  150.08    7.20
  -7   2   1  138.59    6.80
   6  -2  -1  153.68    7.00
  -6  -2   1  145.89    6.70
  -6   2   1  155.38    6.90
   6   2  -1  157.78    7.00
   5  -2  -1  158.18    6.70
  -5  -2   1  157.88    6.60
   5   2  -1  148.89    6.60
  -5   2   1  167.08    6.50
  -4  -2   1  149.69    5.10
  -4  -2   1  141.69    5.80
   4   2  -1  135.39    5.80
  -4   2   1  150.48    5.80
  -3  -2   1  100.29    4.00
   3  -2  -1   97.99    3.40
   3  -2  -1   89.99    4.00
  -3  -2   1   97.59    3.50
  -3   2   1  100.69    4.00
   3   2  -1   90.49    4.00
   2  -2  -1 3194.48  101.59
  -2  -2   1 3110.99  101.29
   2  -2  -1 3013.00  101.49
  -2  -2   1 3031.70  101.49
  -2   2   1 3135.19  101.49
   2   2  -1 3069.19  101.49
  -1  -2   1  576.04   19.00
   1  -2  -1  592.04   19.00
  -1  -2   1  583.64   19.00
  -1   2   1  552.24   19.10
   1   2  -1  568.74   19.00
  -1   2   1  572.14   19.00
   0  -2  -1 1650.73   54.69
   0  -2   1 1663.03   54.69
   0   2  -1 1643.54   54.69
   0   2   1 1716.03   54.69
  -1  -2  -1 1694.53   54.79
   1  -2   1 1682.53   54.69
  -1  -2  -1 1677.73   54.79
   1  -2   1 1670.93   54.79
   1   2   1 1629.34   54.89
  -1   2  -1 1660.13   54.89
   2  -2   1 1712.53   57.59
   2  -2   1 1774.42   57.19
  -2  -2  -1 1769.22   57.29
  -2  -2  -1 1709.13   57.49
   2   2   1 1770.32   57.69
  -2   2  -1 1739.43   57.59
  -3  -2  -1 1604.64   52.09
   3  -2   1 1562.24   52.19
  -3  -2  -1 1595.44   51.69
  -3   2  -1 1519.55   52.09
  -3   2  -1 1587.74   51.49
   3   2   1 1567.34   52.29
   4  -2   1  208.68    8.00
  -4  -2  -1  216.28    7.00
  -4  -2  -1  202.58    7.80
  -4   2  -1  200.08    7.90
   4   2   1  203.88    8.00
  -5  -2  -1  168.68    7.10
   5  -2   1  184.48    7.40
   5   2   1  186.88    7.50
  -5   2  -1  171.28    7.20
   6  -2   1  798.72   27.60
  -6  -2  -1  802.92   27.30
  -6   2  -1  766.72   27.20
   6   2   1  778.22   27.60
   7  -2   1  170.08    8.20
  -7  -2  -1  170.98    7.80
   7   2   1  180.08    8.30
  -7   2  -1  165.28    7.80
  -8  -2  -1   77.09    5.60
   8  -2   1   84.99    6.30
  -8   2  -1   77.69    5.70
   8   2   1   85.09    6.20
   9  -2   1   24.00    4.80
  -9  -2  -1   20.10    4.20
  -9   2  -1   30.90    4.80
   9   2   1   27.50    5.10
   9  -3  -1   23.50    4.90
  -9  -3   1   26.00    4.60
  -9   3   1   27.30    4.30
   9   3  -1   27.80    5.00
   8  -3  -1   57.99    5.30
  -8  -3   1   57.09    4.90
   8   3  -1   55.59    5.30
  -8   3   1   47.60    4.80
   7  -3  -1   34.90    4.00
  -7  -3   1   40.30    3.80
  -7   3   1   33.00    3.40
   7   3  -1   29.10    3.60
  -6  -3   1    0.90    1.80
   6  -3  -1    1.70    2.10
   6   3  -1    0.10    1.90
  -6   3   1    2.90    1.90
  -5  -3   1  182.98    7.10
   5  -3  -1  165.38    7.10
  -5   3   1  179.38    7.00
   5   3  -1  171.98    7.20
   4  -3  -1   28.60    2.40
  -4  -3   1   34.50    1.70
   4  -3  -1   30.60    1.30
  -4  -3   1   28.50    2.30
  -4   3   1   37.10    2.40
   4   3  -1   31.00    2.40
  -3  -3   1   46.20    2.00
   3  -3  -1   41.70    2.40
   3  -3  -1   44.40    1.80
  -3  -3   1   41.60    2.30
   3   3  -1   41.50    2.40
  -3   3   1   43.50    2.30
   2  -3  -1  867.01   28.10
  -2  -3   1  853.61   28.30
  -2  -3   1  882.41   28.10
  -2   3   1  843.72   28.40
   2   3  -1  837.62   28.30
  -2   3   1  816.02   28.20
   1  -3  -1  394.86   13.20
  -1  -3   1  398.96   13.20
  -1  -3   1  406.66   13.20
   1   3  -1  392.36   13.10
  -1   3   1  388.16   13.10
  -1   3   1  383.06   13.20
   0  -3  -1   46.00    1.80
   0  -3   1   46.00    1.80
   0   3   1   42.90    1.80
   0   3  -1   43.30    1.50
  -1  -3  -1 1049.40   33.60
   1  -3   1 1028.60   33.60
  -1  -3  -1 1003.30   33.60
   1  -3   1 1077.49   33.60
  -1   3  -1  974.30   33.70
   1   3   1  985.40   33.70
   2  -3   1   73.99    2.60
  -2  -3  -1   68.59    2.90
   2  -3   1   70.69    3.00
  -2  -3  -1   73.99    2.80
   2   3   1   66.79    3.10
  -2   3  -1   73.69    3.00
   3  -3   1  400.36   12.90
   3  -3   1  383.56   13.60
  -3  -3  -1  395.66   13.10
  -3  -3  -1  384.36   13.40
   3   3   1  377.66   13.60
  -3   3  -1  387.96   13.50
  -4  -3  -1   68.59    3.50
  -4  -3  -1   79.19    2.90
   4  -3   1   73.99    3.90
  -4   3  -1   74.69    3.70
   4   3   1   64.99    3.70
   5  -3   1  250.57    9.70
  -5  -3  -1  249.08    9.40
  -5   3  -1  254.67    9.50
   5   3   1  237.98    9.70
   6  -3   1   67.79    4.60
  -6  -3  -1   76.29    4.40
  -6   3  -1   79.39    4.50
   6   3   1   73.89    5.10
   7  -3   1   26.40    3.60
  -7  -3  -1   28.40    3.20
  -7   3  -1   26.40    3.30
   7   3   1   27.70    3.90
   8  -3   1    9.60    3.50
  -8  -3  -1   11.60    3.10
  -8   3  -1   12.30    3.10
   8   3   1   10.80    3.50
  -9  -3  -1  127.79    7.90
   9  -3   1  130.99    9.20
  -9   3  -1  123.09    7.80
   9   3   1  121.59    9.10
   9  -4  -1    0.30    3.70
  -9  -4   1    8.40    3.60
   9   4  -1    1.80    3.80
  -9   4   1    5.30    3.50
   8  -4  -1    1.70    2.90
  -8  -4   1    5.80    3.10
  -8   4   1   -0.20    3.00
   8   4  -1    1.60    3.00
   7  -4  -1  416.26   16.00
  -7  -4   1  421.36   15.70
  -7   4   1  401.36   15.70
   7   4  -1  443.06   16.10
   6  -4  -1   -0.90    1.90
  -6  -4   1   -0.50    1.80
   6   4  -1    0.30    2.20
  -6   4   1    2.50    1.90
  -5  -4   1  192.08    7.50
   5  -4  -1  185.38    7.60
  -5   4   1  189.38    7.50
   5   4  -1  184.98    7.60
  -4  -4   1   47.90    2.90
   4  -4  -1   55.89    3.10
  -4  -4   1   55.89    2.50
   4  -4  -1   54.59    2.10
   4   4  -1   51.59    3.10
  -4   4   1   56.79    3.00
  -3  -4   1  319.57   10.70
   3  -4  -1  322.87   10.60
  -3  -4   1  304.07   11.00
   3  -4  -1  316.17   11.10
  -3   4   1  314.77   10.90
   3   4  -1  298.57   11.00
   2  -4  -1 1123.79   36.90
  -2  -4   1 1133.49   37.10
  -2  -4   1 1149.48   37.00
   2   4  -1 1118.59   37.10
  -2   4   1 1104.79   37.00
  -2   4   1 1087.09   37.20
  -1  -4   1  566.44   18.90
  -1  -4   1  541.65   18.80
   1  -4  -1  563.54   18.80
  -1   4   1  575.64   18.90
  -1   4   1  566.94   18.70
   1   4  -1  582.04   18.70
   0  -4   1   30.80    1.60
   0  -4  -1   35.30    1.60
   0   4   1   34.30    1.60
   0   4  -1   34.10    1.30
   0   4   1   34.80    1.20
   0   4  -1   32.40    1.50
   1  -4   1 7304.87  236.38
  -1  -4  -1 7360.86  236.58
  -1  -4  -1 6980.10  236.68
   1  -4   1 7313.47  236.98
   1   4   1 7104.09  236.98
  -1   4  -1 7175.88  236.98
   2  -4   1   18.90    1.60
   2  -4   1   18.40    1.10
  -2  -4  -1   18.10    1.30
  -2  -4  -1   18.10    1.40
   2   4   1   14.90    1.50
  -2   4  -1   15.90    1.50
   3  -4   1  309.67    9.90
  -3  -4  -1  276.87   10.30
   3  -4   1  300.67   10.50
  -3  -4  -1  293.77   10.10
   3   4   1  291.87   10.60
  -3   4  -1  286.37   10.40
  -4  -4  -1   34.70    2.40
  -4  -4  -1   38.60    2.00
   4  -4   1   30.70    2.80
   4   4   1   30.70    2.60
  -4   4  -1   38.90    2.60
   5  -4   1   10.30    2.00
  -5  -4  -1    6.60    1.70
  -5   4  -1    8.30    1.90
   5   4   1    9.90    2.10
  -6  -4  -1   36.70    3.30
   6  -4   1   34.50    3.50
  -6   4  -1   30.80    3.20
   6   4   1   33.70    3.70
   7  -4   1   30.80    3.80
  -7  -4  -1   37.20    3.80
   7   4   1   40.10    4.40
  -7   4  -1   37.70    3.90
  -8  -4  -1    8.90    3.40
   8  -4   1   12.60    3.60
  -8   4  -1   10.60    3.20
   8   4   1   14.50    4.00
   9  -4   1   -0.70    3.90
  -9  -4  -1    3.20    3.60
   9   4   1    5.90    4.70
  -9   4  -1    2.40    3.60
   9  -5  -1  117.59    7.90
  -9  -5   1  110.99    7.20
   9   5  -1  104.19    7.70
  -9   5   1  108.19    7.20
  -8  -5   1   55.69    4.90
   8  -5  -1   48.90    5.70
   8   5  -1   59.39    6.00
  -8   5   1   50.59    5.00
  -7  -5   1   24.50    3.10
   7  -5  -1   26.50    3.50
  -7   5   1   26.50    3.40
   7   5  -1   26.80    3.50
  -6  -5   1   63.19    4.20
   6  -5  -1   75.99    4.80
   6   5  -1   69.59    4.80
  -6   5   1   74.59    4.50
   5  -5  -1   -0.20    1.50
  -5  -5   1    0.50    1.40
   5   5  -1    0.30    1.50
  -5   5   1    1.60    1.40
  -4  -5   1  250.97    8.40
  -4  -5   1  223.58    8.80
   4  -5  -1  236.28    9.00
   4  -5  -1  249.97    8.10
  -4   5   1  227.68    8.80
   4   5  -1  231.38    8.90
  -3  -5   1    7.10    1.20
   3  -5  -1    5.30    1.20
  -3  -5   1    7.60    1.00
   3  -5  -1    7.10    0.80
   3   5  -1    5.40    1.10
  -3   5   1    5.10    1.10
  -2  -5   1    1.00    0.70
  -2  -5   1    0.40    0.70
   2  -5  -1    0.20    0.60
   2   5  -1    1.20    0.70
  -2   5   1    0.20    0.80
  -2   5   1    0.40    0.80
   1  -5  -1 2739.93   92.59
  -1  -5   1 2831.92   92.59
  -1  -5   1 2804.62   92.49
   1   5  -1 2834.92   92.39
  -1   5   1 2860.81   92.59
  -1   5   1 2850.61   92.39
   0  -5  -1 1197.78   39.80
   0  -5   1 1197.58   39.80
   0   5  -1 1182.78   39.70
   0   5   1 1195.98   39.50
   0   5   1 1219.88   39.80
   0   5  -1 1228.98   39.50
   1  -5   1   41.20    1.90
  -1  -5  -1   39.20    2.00
  -1  -5  -1   38.80    1.70
   1   5   1   42.50    2.10
  -1   5  -1   42.20    2.00
   2  -5   1  302.97   10.20
  -2  -5  -1  290.97   10.10
   2  -5   1  303.67   10.00
  -2  -5  -1  291.87   10.10
   2   5   1  276.27   10.20
  -2   5  -1  289.97   10.20
   3  -5   1  915.11   29.10
  -3  -5  -1  856.21   29.50
   3  -5   1  876.31   29.60
  -3  -5  -1  866.81   29.30
  -3   5  -1  891.21   29.60
   3   5   1  877.31   29.70
   4  -5   1   63.29    3.40
  -4  -5  -1   62.69    3.20
   4  -5   1   60.69    2.30
  -4  -5  -1   68.59    2.80
   4   5   1   58.29    3.50
  -4   5  -1   62.49    3.50
   5  -5   1   12.90    2.20
  -5  -5  -1   16.50    2.00
  -5   5  -1   13.00    2.00
   5   5   1   13.40    2.30
  -6  -5  -1   20.40    2.80
   6  -5   1   16.90    2.80
   6   5   1   20.50    2.90
  -6   5  -1   20.30    2.60
  -7  -5  -1  292.27   11.60
   7  -5   1  284.07   11.80
   7   5   1  288.67   11.90
  -7   5  -1  272.37   11.30
   8  -5   1  235.28   11.10
  -8  -5  -1  240.58   10.60
  -8   5  -1  253.47   10.70
   8   5   1  255.57   11.40
  -9  -5  -1   11.20    3.90
   9  -5   1   11.70    4.50
   9   5   1   12.80    5.20
  -9   5  -1    8.80    3.90
   9  -6  -1    6.20    4.40
  -9  -6   1    2.60    3.50
   9   6  -1    0.20    4.40
  -9   6   1    4.50    3.50
  -8  -6   1   88.69    5.70
   8  -6  -1   78.89    5.90
  -8   6   1   78.69    5.70
   8   6  -1   81.09    6.10
   7  -6  -1    6.50    2.70
  -7  -6   1    5.60    2.40
   7   6  -1    8.10    3.10
  -7   6   1    2.90    2.30
   6  -6  -1   25.10    3.00
  -6  -6   1   33.90    3.20
  -6   6   1   28.60    3.10
   6   6  -1   41.80    4.00
  -5  -6   1  252.17    9.70
   5  -6  -1  256.87   10.00
  -5  -6   1  265.87    9.10
   5   6  -1  248.98    9.90
  -5   6   1  259.97    9.80
   4  -6  -1  560.84   18.80
  -4  -6   1  592.34   19.00
   4  -6  -1  543.65   19.50
  -4  -6   1  529.25   19.30
   4   6  -1  566.64   19.50
  -4   6   1  582.14   19.40
  -3  -6   1  121.49    4.40
  -3  -6   1  104.49    4.50
   3  -6  -1  111.09    4.20
  -3   6   1  113.09    4.70
  -3   6   1  121.29    4.60
   3   6  -1  106.49    4.60
  -2  -6   1 4353.96  143.09
  -2  -6   1 4376.06  143.09
   2  -6  -1 4266.47  142.99
  -2   6   1 4378.86  143.09
   2   6  -1 4348.27  143.09
  -2   6   1 4462.95  143.29
  -1  -6   1   81.49    3.50
   1  -6  -1   89.49    3.50
   1   6  -1   87.09    3.20
  -1   6   1   86.89    3.50
  -1   6   1   89.59    3.20
   0  -6  -1 1825.12   63.39
   0  -6   1 1897.11   63.39
   0   6   1 1879.01   63.09
   0   6  -1 2009.00   63.19
   0   6   1 2015.70   63.39
   0   6  -1 1932.71   63.29
  -1  -6  -1   82.69    3.00
   1  -6   1   78.69    3.20
  -1  -6  -1   79.29    3.30
  -1   6  -1   80.79    3.20
   1   6   1   79.39    3.30
  -1   6  -1   80.79    3.10
  -2  -6  -1   18.40    1.40
  -2  -6  -1   18.70    1.60
   2  -6   1   16.80    1.30
   2  -6   1   20.70    1.50
   2   6   1   15.80    1.60
  -2   6  -1   18.20    1.60
  -3  -6  -1   35.00    2.10
  -3  -6  -1   34.50    2.20
   3  -6   1   32.50    2.20
   3  -6   1   31.40    1.70
  -3   6  -1   30.50    2.20
   3   6   1   29.50    2.30
   4  -6   1  299.67    9.90
  -4  -6  -1  278.87   10.60
   4  -6   1  288.77   10.80
  -4  -6  -1  297.47   10.30
  -4   6  -1  307.67   10.80
   4   6   1  288.37   10.90
   5  -6   1  425.96   15.90
  -5  -6  -1  455.45   15.80
   5   6   1  448.26   16.10
  -5   6  -1  436.86   15.80
   6  -6   1   76.29    4.80
  -6  -6  -1   74.59    4.50
  -6   6  -1   74.09    4.50
   6   6   1   80.49    5.30
   7  -6   1  187.58    8.80
  -7  -6  -1  181.38    8.10
   7   6   1  174.78    8.60
  -7   6  -1  170.58    8.00
  -8  -6  -1   93.59    6.60
   8  -6   1   97.19    6.80
   8   6   1  102.99    7.00
  -8   6  -1   96.79    6.80
   9  -6   1   67.09    7.10
  -9  -6  -1   66.29    6.20
  -9   6  -1   60.49    6.30
   9   6   1   61.09    6.70
  -9  -7   1   -0.40    3.50
   9  -7  -1    1.20    3.90
  -9   7   1   -1.70    3.40
   9   7  -1    0.50    4.00
   8  -7  -1    5.80    3.50
  -8  -7   1    6.40    3.20
   8   7  -1    6.40    3.30
  -8   7   1   10.30    3.50
   7  -7  -1   98.19    6.20
  -7  -7   1   95.29    5.90
   7   7  -1   97.69    5.90
  -7   7   1   96.69    5.60
  -6  -7   1  168.38    7.50
   6  -7  -1  168.48    7.70
  -6   7   1  177.08    7.60
   6   7  -1  184.18    8.00
   5  -7  -1   95.99    5.00
  -5  -7   1   93.49    4.60
  -5  -7   1  105.89    4.10
  -5   7   1   91.49    4.60
   5   7  -1   90.89    4.80
   4  -7  -1  213.38    7.40
   4  -7  -1  213.78    8.20
  -4  -7   1  212.78    7.70
  -4  -7   1  197.58    7.90
  -4   7   1  213.78    7.90
   4   7  -1  210.78    8.10
   3  -7  -1  227.28    8.20
  -3  -7   1  221.88    8.40
  -3  -7   1  246.48    8.40
  -3   7   1  217.98    8.60
  -3   7   1  240.78    8.40
   3   7  -1  245.58    8.50
   2  -7  -1  606.14   19.80
  -2  -7   1  581.44   19.80
  -2  -7   1  574.84   19.80
   2   7  -1  585.34   19.70
  -2   7   1  566.44   19.90
  -2   7   1  607.84   19.70
   1  -7  -1    2.20    0.80
  -1  -7   1    2.60    0.90
  -1   7   1    3.60    0.70
   1   7  -1    2.80    0.70
   1   7  -1    2.90    0.80
  -1   7   1    1.90    0.80
   0  -7  -1   13.10    1.40
   0  -7   1   12.20    1.20
   0   7  -1   12.40    1.00
   0   7  -1   15.10    1.20
   0   7   1   14.80    0.90
   0   7   1   11.60    1.30
  -1  -7  -1  136.59    4.70
   1  -7   1  132.29    5.00
  -1  -7  -1  133.09    5.10
  -1   7  -1  130.49    4.90
  -1   7  -1  129.29    4.80
   1   7   1  132.69    5.00
   2  -7   1   11.80    1.30
  -2  -7  -1   13.00    1.20
   2  -7   1   10.60    1.10
  -2  -7  -1   13.80    1.40
  -2   7  -1   10.10    1.20
   2   7   1   12.30    1.50
  -3  -7  -1  511.25   17.50
   3  -7   1  511.25   17.70
  -3  -7  -1  518.95   17.50
   3  -7   1  524.45   17.30
   3   7   1  508.65   17.80
  -3   7  -1  501.75   17.60
  -4  -7  -1  303.17   10.60
   4  -7   1  312.57   11.10
   4  -7   1  314.57   10.30
  -4  -7  -1  292.77   10.90
   4   7   1  294.27   11.20
  -4   7  -1  286.37   11.00
  -5  -7  -1    5.30    1.70
   5  -7   1    5.30    1.80
   5   7   1    5.70    2.00
  -5   7  -1    2.90    1.70
  -6  -7  -1   57.59    4.30
   6  -7   1   54.09    4.30
  -6   7  -1   63.99    4.10
   6   7   1   62.19    4.60
   7  -7   1    6.30    2.80
  -7  -7  -1    4.70    2.80
  -7   7  -1    9.30    2.70
   7   7   1    7.90    3.00
  -8  -7  -1   19.50    3.50
   8  -7   1   15.40    4.10
   8   7   1   20.90    4.20
  -8   7  -1   19.50    3.70
   9  -7   1   -0.60    4.60
  -9  -7  -1    3.40    3.70
  -9   7  -1    1.50    3.80
   9   7   1    1.80    4.10
   9  -8  -1   -0.10    3.70
  -9  -8   1   -0.80    3.90
   9   8  -1    2.00    4.50
  -9   8   1    8.30    3.80
  -8  -8   1  142.89    7.50
   8  -8  -1  129.89    7.80
   8   8  -1  137.49    7.90
  -8   8   1  145.69    7.90
   7  -8  -1  208.58    9.20
  -7  -8   1  208.28    8.90
  -7   8   1  188.08    8.80
   7   8  -1  213.48    9.30
  -6  -8   1  592.44   21.30
   6  -8  -1  610.84   21.60
  -6   8   1  581.34   21.30
   6   8  -1  632.54   21.70
  -5  -8   1   80.29    3.60
  -5  -8   1   74.29    4.20
   5  -8  -1   70.99    4.20
  -5   8   1   73.39    4.00
   5   8  -1   70.29    4.10
   4  -8  -1  529.85   17.50
   4  -8  -1  511.95   18.10
  -4  -8   1  537.25   17.70
  -4  -8   1  504.35   17.90
   4   8  -1  502.35   18.00
  -4   8   1  511.75   17.90
  -3  -8   1  213.18    7.40
   3  -8  -1  200.38    7.20
  -3  -8   1  193.08    7.40
  -3   8   1  193.98    7.60
   3   8  -1  199.98    7.40
  -3   8   1  193.08    7.30
  -2  -8   1  404.26   14.10
  -2  -8   1  413.26   14.20
   2  -8  -1  414.86   14.20
  -2   8   1  418.66   14.10
   2   8  -1  416.76   14.10
  -2   8   1  413.16   14.30
   1  -8  -1  111.19    4.50
  -1  -8   1  105.89    4.50
  -1   8   1  112.29    4.10
  -1   8   1  114.09    4.40
   1   8  -1  115.39    4.30
   1   8  -1  115.29    4.20
   0  -8   1 2535.85   84.19
   0  -8  -1 2496.55   84.19
   0   8  -1 2529.75   83.99
   0   8   1 2568.54   83.79
   0   8  -1 2593.44   83.89
   0   8   1 2618.34   84.19
  -1  -8  -1 1200.88   38.40
  -1  -8  -1 1128.29   38.70
   1  -8   1 1180.28   38.70
  -1   8  -1 1132.59   38.60
  -1   8  -1 1174.28   38.50
   1   8   1 1163.48   38.70
   2  -8   1 2298.67   75.19
  -2  -8  -1 2252.27   75.29
   2  -8   1 2315.77   75.19
  -2  -8  -1 2327.97   75.09
  -2   8  -1 2214.38   75.19
   2   8   1 2280.47   75.29
  -3  -8  -1   16.00    1.60
  -3  -8  -1   12.30    1.40
   3  -8   1   13.70    1.60
   3  -8   1   11.90    1.20
   3   8   1   12.40    1.70
  -3   8  -1   18.00    1.80
   4  -8   1  225.68    7.70
  -4  -8  -1  217.78    8.30
   4  -8   1  211.78    8.40
  -4  -8  -1  221.38    8.00
  -4   8  -1  217.28    8.30
   4   8   1  219.18    8.60
  -5  -8  -1   31.70    2.80
   5  -8   1   31.20    3.00
   5   8   1   37.30    3.70
  -5   8  -1   31.50    3.00
  -6  -8  -1  127.39    6.40
   6  -8   1  127.29    6.40
   6   8   1  130.69    6.90
  -6   8  -1  126.79    6.20
  -7  -8  -1   47.80    4.80
   7  -8   1   50.69    5.20
  -7   8  -1   43.40    4.40
   7   8   1   42.00    4.90
  -8  -8  -1    3.60    3.30
   8  -8   1    0.80    3.30
   8   8   1    1.00    3.80
  -8   8  -1   -1.60    3.00
   9  -8   1  132.09    9.20
  -9  -8  -1  119.29    8.20
   9   8   1  113.99    8.70
  -9   8  -1  103.49    7.70
  -9  -9   1    4.40    4.10
   9  -9  -1   -0.70    4.00
   9   9  -1   -1.80    4.00
  -9   9   1   -1.40    3.60
   8  -9  -1  105.99    7.20
  -8  -9   1  122.49    6.70
  -8   9   1   98.69    7.00
   8   9  -1  114.69    7.20
   7  -9  -1   13.20    3.30
  -7  -9   1   11.30    2.80
  -7   9   1   11.80    3.10
   7   9  -1   16.40    3.30
   6  -9  -1   90.49    5.60
  -6  -9   1  113.89    5.50
  -6   9   1  108.49    5.40
   6   9  -1  107.09    5.70
   5  -9  -1  338.87   12.50
  -5  -9   1  321.87   12.30
  -5  -9   1  340.37   11.80
  -5   9   1  335.57   12.20
   5   9  -1  320.67   12.40
   4  -9  -1  279.67   10.40
   4  -9  -1  281.97    9.70
  -4  -9   1  261.97   10.10
  -4  -9   1  285.27    9.90
  -4   9   1  278.07   10.10
   4   9  -1  258.17   10.20
  -3  -9   1  101.19    4.50
  -3  -9   1  126.09    4.70
   3  -9  -1  110.19    4.50
  -3   9   1  112.09    4.60
   3   9  -1  108.59    4.60
  -3   9   1  103.39    4.70
  -2  -9   1  315.27   11.00
   2  -9  -1  322.67   11.00
  -2  -9   1  309.07   11.10
   2   9  -1  314.47   10.90
  -2   9   1  312.57   11.10
  -2   9   1  307.87   10.80
  -1  -9   1   34.80    2.20
   1  -9  -1   36.90    2.30
  -1   9   1   37.20    2.00
   1   9  -1   34.70    1.90
  -1   9   1   36.10    1.80
   1   9  -1   34.20    1.80
   0  -9   1  117.89    4.80
   0  -9  -1  110.29    4.80
   0   9  -1  122.49    4.50
   0   9   1  129.69    4.80
   0   9  -1  127.59    4.70
   0   9   1  126.89    4.40
  -1  -9  -1  660.23   22.40
   1  -9   1  664.53   22.30
  -1  -9  -1  674.23   22.00
   1   9   1  655.83   22.30
  -1   9  -1  672.13   22.30
  -1   9  -1  644.74   22.10
   2  -9   1  816.92   27.80
  -2  -9  -1  835.72   27.60
  -2  -9  -1  819.22   27.90
  -2   9  -1  845.12   27.80
   2   9   1  818.42   27.90
  -2   9  -1  839.42   27.80
  -3  -9  -1 1155.38   38.60
   3  -9   1 1200.78   38.50
   3  -9   1 1158.08   38.70
  -3  -9  -1 1134.99   38.50
   3   9   1 1150.28   38.90
  -3   9  -1 1137.49   38.70
  -4  -9  -1  556.94   18.70
   4  -9   1  556.04   18.40
  -4  -9  -1  534.65   18.80
   4  -9   1  546.25   19.10
  -4   9  -1  530.95   19.00
   4   9   1  542.75   19.20
  -5  -9  -1  214.58    8.30
   5  -9   1  210.08    8.50
  -5   9  -1  194.68    8.40
   5   9   1  214.08    8.80
  -6  -9  -1   46.10    3.70
   6  -9   1   45.10    4.40
   6   9   1   43.20    4.30
  -6   9  -1   40.50    3.80
   7  -9   1   47.00    4.70
  -7  -9  -1   46.60    4.80
  -7   9  -1   39.50    4.00
   7   9   1   43.00    4.90
   8  -9   1  104.39    7.30
  -8  -9  -1  120.19    6.90
   8   9   1  128.39    7.80
  -8   9  -1  122.79    7.10
   9  -9   1    5.80    4.40
  -9  -9  -1    5.20    3.80
  -9   9  -1    4.10    4.00
   9   9   1    7.10    5.10
   9 -10  -1   78.79    8.20
  -9 -10   1   77.69    6.80
  -9  10   1   80.29    7.50
   9  10  -1   81.09    7.40
   8 -10  -1    5.30    3.40
  -8 -10   1    5.70    3.20
  -8  10   1    4.00    3.30
   8  10  -1    6.70    3.50
   7 -10  -1    1.10    2.60
  -7 -10   1    5.80    2.60
   7  10  -1    4.00    3.10
  -7  10   1    0.60    2.70
  -6 -10   1   70.09    4.50
   6 -10  -1   75.69    4.90
  -6  10   1   74.09    4.80
   6  10  -1   78.59    4.90
   5 -10  -1  142.69    6.60
  -5 -10   1  158.58    6.50
  -5 -10   1  150.78    6.10
  -5  10   1  153.48    6.40
   5  10  -1  135.89    6.60
  -4 -10   1  367.16   13.00
   4 -10  -1  373.26   13.40
   4 -10  -1  368.56   12.80
  -4 -10   1  361.86   13.10
  -4  10   1  380.26   13.10
   4  10  -1  355.16   13.20
  -3 -10   1 2142.59   71.09
   3 -10  -1 2146.79   70.99
  -3 -10   1 2213.28   71.09
  -3  10   1 2102.19   71.29
   3  10  -1 2139.49   71.09
  -3  10   1 2150.38   70.99
  -2 -10   1  848.32   28.50
  -2 -10   1  850.31   28.30
   2 -10  -1  821.92   28.40
  -2  10   1  857.21   28.50
   2  10  -1  822.42   28.20
  -2  10   1  867.41   28.20
   1 -10  -1 1482.65   50.59
  -1 -10   1 1489.75   50.59
   1  10  -1 1563.44   50.29
   1  10  -1 1593.04   50.39
  -1  10   1 1519.95   50.19
  -1  10   1 1490.35   50.49
   0 -10   1   10.10    1.30
   0 -10  -1    6.50    1.30
   0  10   1    8.70    1.20
   0  10  -1    8.00    0.90
   0  10  -1    7.30    1.10
   0  10   1    7.50    0.80
   1 -10   1  141.09    5.60
  -1 -10  -1  151.98    5.80
  -1  10  -1  145.29    5.60
   1  10   1  147.19    5.30
  -1  10  -1  147.19    5.40
   1  10   1  146.19    5.60
  -2 -10  -1   11.60    1.50
   2 -10   1   11.30    1.40
  -2 -10  -1    8.30    1.10
  -2  10  -1    9.10    1.50
   2  10   1    9.70    1.40
  -2  10  -1    8.50    1.30
  -3 -10  -1    2.70    1.30
   3 -10   1    0.20    1.30
  -3 -10  -1    0.60    1.10
   3 -10   1   -1.60    1.00
  -3  10  -1    1.10    1.20
   3  10   1   -0.20    1.20
  -4 -10  -1  553.74   19.40
  -4 -10  -1  557.64   19.30
   4 -10   1  586.24   19.10
   4 -10   1  551.44   19.60
   4  10   1  553.94   19.80
  -4  10  -1  559.74   19.50
   5 -10   1  349.37   13.00
  -5 -10  -1  347.17   12.80
  -5 -10  -1  357.96   12.80
  -5  10  -1  347.17   12.90
   5  10   1  336.67   13.20
   6 -10   1   59.99    4.50
  -6 -10  -1   62.49    4.20
  -6  10  -1   57.29    4.30
   6  10   1   71.29    4.90
   7 -10   1  140.49    7.60
  -7 -10  -1  161.88    7.40
   7  10   1  158.38    8.00
  -7  10  -1  137.79    7.30
   8 -10   1    5.70    3.50
  -8 -10  -1    4.30    3.10
  -8  10  -1    7.20    3.70
   8  10   1    9.80    3.90
   9 -10   1    1.30    4.30
  -9 -10  -1    4.20    3.90
  -9  10  -1    2.30    4.30
   9  10   1   -0.50    5.20
   9 -11  -1  148.29    9.90
  -9 -11   1  148.99    8.80
  -9  11   1  150.08    8.80
   9  11  -1  148.89   10.00
   8 -11  -1   -1.90    3.20
  -8 -11   1   -3.70    3.30
  -8  11   1    0.70    3.10
   8  11  -1   -0.90    3.30
  -7 -11   1   72.89    5.10
   7 -11  -1   70.29    5.40
   7  11  -1   78.39    5.60
  -7  11   1   70.49    5.40
  -6 -11   1  109.29    5.60
   6 -11  -1  110.99    5.90
  -6  11   1  109.59    5.80
   6  11  -1  105.39    6.10
  -5 -11   1  654.23   22.50
  -5 -11   1  661.83   22.80
   5 -11  -1  648.54   23.00
   5  11  -1  686.73   23.10
  -5  11   1  625.74   22.70
  -4 -11   1  686.93   23.80
   4 -11  -1  707.03   23.50
  -4 -11   1  700.63   23.80
  -4  11   1  677.93   24.10
   4  11  -1  702.43   24.00
  -4  11   1  691.73   23.80
  -3 -11   1   43.00    2.70
  -3 -11   1   49.30    3.00
   3 -11  -1   50.29    2.80
   3  11  -1   44.90    2.80
  -3  11   1   50.49    2.80
  -3  11   1   48.50    3.10
   2 -11  -1   13.60    1.60
  -2 -11   1    7.80    1.30
  -2 -11   1    7.50    1.40
  -2  11   1    9.80    1.50
   2  11  -1   11.30    1.30
  -2  11   1   12.70    1.30
  -1 -11   1  640.14   21.80
   1 -11  -1  632.64   21.80
  -1  11   1  623.44   21.30
   1  11  -1  655.83   21.60
  -1  11   1  632.64   21.70
   1  11  -1  647.14   21.40
   0 -11   1  326.67   12.40
   0 -11  -1  353.56   12.50
   0  11   1  356.56   12.40
   0  11  -1  359.76   12.20
   0  11   1  364.26   12.00
   0  11  -1  358.26   12.10
   1 -11   1   19.00    1.90
  -1 -11  -1   22.40    2.20
  -1  11  -1   24.50    2.00
  -1  11  -1   21.50    1.60
   1  11   1   27.40    1.50
   1  11   1   25.80    2.00
  -2 -11  -1  232.48    8.40
  -2 -11  -1  227.48    8.00
   2 -11   1  223.08    8.20
   2  11   1  210.98    8.20
  -2  11  -1  217.98    8.20
  -2  11  -1  227.08    8.20
  -3 -11  -1  517.75   17.50
   3 -11   1  497.15   17.20
   3 -11   1  509.65   17.40
  -3 -11  -1  494.75   17.20
   3  11   1  492.05   17.60
  -3  11  -1  494.55   17.40
  -4 -11  -1   31.60    2.60
   4 -11   1   31.00    2.70
  -4 -11  -1   31.60    2.40
   4 -11   1   28.50    2.30
  -4  11  -1   31.30    2.70
   4  11   1   23.30    2.70
  -5 -11  -1    2.10    1.70
   5 -11   1    3.00    2.10
  -5 -11  -1    3.70    1.90
  -5  11  -1    5.00    2.10
   5  11   1    2.50    2.00
  -6 -11  -1    2.40    2.10
   6 -11   1    3.90    2.30
   6  11   1    4.90    2.80
  -6  11  -1    3.90    2.30
  -7 -11  -1  173.78    8.00
   7 -11   1  170.58    8.50
   7  11   1  174.58    8.80
  -7  11  -1  172.68    8.10
  -8 -11  -1   60.49    5.50
   8 -11   1   62.89    6.10
  -8  11  -1   58.89    5.60
   8  11   1   67.89    7.20
   9 -11   1  108.99    9.40
  -9 -11  -1  121.19    8.50
   9  11   1  123.79    9.30
  -9  11  -1  114.99    8.10
  -9 -12   1   36.80    5.50
   9 -12  -1   34.50    5.50
   9  12  -1   41.30    6.20
  -9  12   1   29.80    5.30
   8 -12  -1   88.39    7.40
  -8 -12   1  109.49    6.70
   8  12  -1  100.59    7.60
  -8  12   1   97.09    6.40
  -7 -12   1  178.28    8.40
   7 -12  -1  180.78    8.80
  -7  12   1  184.28    8.60
   7  12  -1  188.48    9.10
   6 -12  -1   51.29    4.40
  -6 -12   1   53.89    4.20
  -6  12   1   55.99    4.00
   6  12  -1   62.19    4.50
  -5 -12   1  345.37   12.80
   5 -12  -1  364.46   13.30
  -5 -12   1  346.87   13.00
  -5  12   1  347.77   13.00
   5  12  -1  357.76   13.30
   4 -12  -1   88.19    4.00
  -4 -12   1   86.99    4.30
  -4 -12   1   93.69    4.40
  -4  12   1   90.19    4.70
   4  12  -1   92.19    4.50
  -4  12   1   82.09    4.10
  -3 -12   1  117.09    5.00
  -3 -12   1  127.39    5.30
  -3  12   1  129.79    5.00
  -3  12   1  121.39    5.30
   3  12  -1  120.19    5.10
  -2 -12   1  114.99    4.90
   2 -12  -1  109.69    4.80
  -2  12   1  115.79    4.50
   2  12  -1  109.79    4.60
   2  12  -1  112.49    4.50
  -2  12   1  110.69    4.80
  -1 -12   1  188.18    7.10
   1 -12  -1  170.98    7.00
  -1  12   1  175.98    6.90
   1  12  -1  185.78    6.70
  -1  12   1  184.28    6.60
   1  12  -1  190.48    6.80
   0 -12  -1    0.60    1.20
   0 -12   1    0.40    1.20
   0  12   1    1.90    0.80
   0  12   1   -0.40    1.00
   0  12  -1    0.50    0.80
   0  12  -1    1.50    1.00
  -1 -12  -1 2089.59   70.79
   1 -12   1 2166.08   70.79
   1  12   1 2190.78   70.29
   1  12   1 2144.49   70.59
  -1  12  -1 2098.29   70.39
  -1  12  -1 2121.69   70.49
  -2 -12  -1  664.13   22.50
   2 -12   1  638.94   22.30
  -2 -12  -1  647.94   22.10
   2  12   1  662.53   22.40
  -2  12  -1  659.23   22.30
  -2  12  -1  660.33   22.30
   3 -12   1   96.69    4.40
   3 -12   1  107.19    4.70
  -3 -12  -1  103.99    4.80
  -3 -12  -1  101.09    4.30
  -3  12  -1  105.29    4.60
   3  12   1   93.69    4.60
   4 -12   1   -0.20    1.20
  -4 -12  -1    0.40    1.50
   4 -12   1   -1.30    1.40
  -4 -12  -1   -1.10    1.40
  -4  12  -1    0.60    1.70
   4  12   1    0.40    1.60
   5 -12   1   32.60    3.30
  -5 -12  -1   30.70    3.00
  -5 -12  -1   37.00    3.10
   5  12   1   37.00    3.60
  -5  12  -1   34.90    3.60
   6 -12   1  144.29    7.30
  -6 -12  -1  138.59    6.60
  -6  12  -1  142.89    6.90
   6  12   1  149.79    7.40
  -7 -12  -1   37.30    4.10
   7 -12   1   43.60    4.80
   7  12   1   46.90    5.20
  -7  12  -1   43.20    4.50
   8 -12   1    3.50    4.10
  -8 -12  -1    3.60    3.20
  -8  12  -1    2.60    3.40
   8  12   1    1.70    3.80
   9 -12   1    9.20    4.80
  -9 -12  -1    9.60    4.20
   9  12   1    9.90    5.80
  -9  12  -1    5.60    4.80
   9 -13  -1   19.20    5.20
  -9 -13   1   20.50    4.70
   9  13  -1   24.20    5.30
  -9  13   1   10.90    4.40
  -8 -13   1    9.10    3.40
   8 -13  -1    3.30    3.60
   8  13  -1    8.00    4.20
  -8  13   1    9.40    3.40
  -7 -13   1   23.70    3.70
   7 -13  -1   26.00    4.10
  -7  13   1   23.50    3.30
   7  13  -1   32.10    4.30
  -6 -13   1   -1.10    2.10
   6 -13  -1    0.80    2.30
  -6  13   1    1.50    2.30
   6  13  -1    1.40    2.60
   5 -13  -1    3.40    2.10
  -5 -13   1    9.90    2.00
  -5 -13   1    8.30    2.10
   5  13  -1    6.30    2.20
  -5  13   1   10.50    2.20
  -4 -13   1  384.26   14.10
  -4 -13   1  382.16   14.00
   4 -13  -1  401.16   13.90
   4  13  -1  388.56   14.10
  -4  13   1  387.06   14.30
  -4  13   1  398.46   14.00
  -3 -13   1   71.89    3.60
  -3 -13   1   88.29    4.20
   3 -13  -1   84.29    3.90
   3  13  -1   71.59    3.80
  -3  13   1   72.89    3.90
  -3  13   1   84.89    3.80
   2 -13  -1   36.70    2.80
  -2 -13   1   45.70    2.80
  -2  13   1   32.80    2.50
   2  13  -1   36.80    2.40
  -2  13   1   45.10    2.40
   2  13  -1   38.20    2.50
  -1 -13   1   21.20    2.20
   1 -13  -1   24.10    2.30
   1  13  -1   23.10    1.90
   1  13  -1   26.20    1.90
  -1  13   1   21.80    2.00
  -1  13   1   25.20    1.80
   0 -13   1    8.00    1.60
   0 -13  -1    7.60    1.60
   0  13   1   10.40    1.50
   0  13  -1    8.50    1.10
   0  13   1   10.60    1.10
   0  13  -1   10.20    1.40
  -1 -13  -1  345.97   12.50
   1 -13   1  340.47   12.40
   1  13   1  361.26   11.90
  -1  13  -1  354.26   12.20
   1  13   1  331.27   12.30
  -1  13  -1  342.27   12.10
  -2 -13  -1  103.49    4.30
   2 -13   1   96.49    4.60
  -2 -13  -1  108.69    4.80
  -2  13  -1   96.89    4.50
  -2  13  -1  119.89    4.70
   2  13   1  111.59    4.80
  -3 -13  -1   21.70    2.40
   3 -13   1   15.70    1.80
  -3 -13  -1   17.30    1.70
   3 -13   1   25.90    2.40
  -3  13  -1   22.30    2.30
   3  13   1   14.60    2.00
  -4 -13  -1  148.69    6.10
   4 -13   1  149.09    6.30
  -4 -13  -1  132.79    5.90
   4 -13   1  140.39    5.70
  -4  13  -1  139.09    6.20
   4  13   1  127.89    6.30
  -5 -13  -1   29.30    3.00
  -5 -13  -1   31.00    3.20
   5 -13   1   24.10    2.90
  -5  13  -1   27.50    3.00
   5  13   1   27.50    3.30
  -6 -13  -1   65.99    4.60
   6 -13   1   74.19    5.40
   6  13   1   76.89    5.70
  -6  13  -1   71.79    4.90
   7 -13   1    1.20    2.90
  -7 -13  -1   -0.20    2.50
   7  13   1    3.40    3.60
  -7  13  -1   -1.90    2.90
  -8 -13  -1    2.20    3.30
   8 -13   1    3.60    3.70
  -8  13  -1    1.80    3.90
   8  13   1    3.40    4.00
   9 -13   1    4.90    5.20
  -9 -13  -1    6.40    4.70
   9  13   1    5.70    5.30
  -9  13  -1    6.80    4.40
  -9 -14   1   26.30    4.90
   9 -14  -1   33.60    5.60
   9  14  -1   30.60    5.70
  -9  14   1   22.40    4.80
  -8 -14   1   64.39    6.30
   8 -14  -1   63.69    7.10
   8  14  -1   75.49    6.50
  -8  14   1   70.49    6.50
   7 -14  -1   15.20    3.50
  -7 -14   1   25.90    3.70
  -7  14   1   17.30    3.40
   7  14  -1   13.00    3.80
  -6 -14   1    8.50    2.70
   6 -14  -1    5.90    2.60
  -6  14   1    5.90    2.60
   6  14  -1    4.10    2.80
   5 -14  -1  275.37   10.80
  -5 -14   1  258.87   10.40
  -5 -14   1  281.07   10.40
   5  14  -1  268.47   10.60
  -5  14   1  269.17   10.50
  -4 -14   1    0.60    1.50
  -4 -14   1    0.90    1.60
   4 -14  -1    0.90    1.50
  -4  14   1   -0.50    1.90
   4  14  -1   -0.30    1.70
  -4  14   1    1.40    1.60
   3 -14  -1  601.84   20.80
  -3 -14   1  608.84   21.00
  -3 -14   1  603.04   20.80
   3  14  -1  600.04   20.80
  -3  14   1  601.04   21.00
  -3  14   1  599.54   20.60
  -2 -14   1 1523.45   51.39
   2 -14  -1 1527.25   51.29
  -2  14   1 1562.74   50.89
   2  14  -1 1562.24   50.99
   2  14  -1 1522.65   50.99
  -2  14   1 1512.25   51.29
  -1 -14   1  600.44   20.90
   1 -14  -1  584.24   20.80
   1  14  -1  617.64   20.40
  -1  14   1  611.04   20.70
   1  14  -1  597.34   20.50
  -1  14   1  595.54   20.30
   0 -14  -1   -0.30    1.40
   0 -14   1    1.50    1.30
   0  14   1    0.90    1.10
   0  14   1    1.30    0.90
   0  14  -1    1.60    1.20
   0  14  -1    1.60    1.00
   1 -14   1  249.78    9.80
  -1 -14  -1  250.17    9.80
  -1  14  -1  258.77    9.40
   1  14   1  273.67    9.20
   1  14   1  266.77    9.60
  -1  14  -1  265.97    9.50
   2 -14   1  305.77   11.50
  -2 -14  -1  335.07   11.70
  -2  14  -1  302.27   11.30
  -2  14  -1  319.87   11.30
   2  14   1  310.77   11.40
   2  14   1  320.47   11.10
   3 -14   1  457.35   16.00
  -3 -14  -1  454.65   15.80
  -3 -14  -1  468.25   16.30
   3  14   1  436.56   16.20
  -3  14  -1  464.45   16.10
   4 -14   1   -0.90    1.50
   4 -14   1    0.80    1.50
  -4 -14  -1    1.80    1.70
  -4 -14  -1   -0.20    1.50
   4  14   1    0.70    1.80
  -4  14  -1    1.80    1.90
  -5 -14  -1  261.57   10.10
   5 -14   1  258.07   10.50
  -5 -14  -1  267.27   10.20
   5  14   1  280.87   10.90
  -5  14  -1  243.58   10.20
   6 -14   1  596.34   21.80
  -6 -14  -1  620.84   21.40
   6  14   1  597.14   21.90
  -6  14  -1  582.44   21.60
  -7 -14  -1   14.50    3.60
   7 -14   1   13.30    3.70
   7  14   1   19.90    4.30
  -7  14  -1   21.10    3.40
  -8 -14  -1   16.40    3.90
   8 -14   1   13.40    4.50
   8  14   1   10.90    4.30
  -8  14  -1   16.90    4.00
  -9 -14  -1   46.20    6.30
   9  14   1   50.79    7.20
  -9 -15   1    8.60    5.00
   9  15  -1    5.30    5.10
  -9  15   1    4.70    4.80
   8 -15  -1   16.30    4.30
  -8 -15   1   21.70    4.30
   8  15  -1   16.20    4.70
  -8  15   1   14.50    3.80
  -7 -15   1    5.60    3.20
   7 -15  -1    3.10    3.30
  -7  15   1    1.20    2.70
   7  15  -1    4.30    3.20
   6 -15  -1    2.70    2.80
  -6 -15   1    0.40    2.30
   6  15  -1    0.60    2.50
  -6  15   1   -0.70    2.10
  -5 -15   1   83.99    4.70
   5 -15  -1   85.09    5.30
  -5 -15   1   84.59    4.80
  -5  15   1   73.79    4.80
   5  15  -1   95.79    5.00
  -4 -15   1    9.00    2.00
   4 -15  -1   14.00    2.00
  -4 -15   1   11.80    2.10
  -4  15   1    9.00    1.90
   4  15  -1   10.10    2.10
  -4  15   1   14.10    2.30
  -3 -15   1   -0.60    1.20
   3 -15  -1   -0.60    1.30
  -3 -15   1    0.40    1.50
   3  15  -1    0.70    1.40
  -3  15   1    1.70    1.40
  -3  15   1   -0.40    1.40
  -2 -15   1   61.99    3.50
   2 -15  -1   49.70    3.30
   2  15  -1   57.29    3.20
  -2  15   1   67.69    3.10
  -2  15   1   53.39    3.40
   2  15  -1   60.09    3.20
  -1 -15   1    2.60    1.50
   1 -15  -1    1.50    1.50
   1  15  -1    2.30    1.20
  -1  15   1    1.90    1.20
   1  15  -1    2.20    1.30
  -1  15   1    3.30    1.10
   0 -15   1 1107.09   38.50
   0 -15  -1 1138.79   38.60
   0  15  -1 1130.29   38.20
   0  15  -1 1146.09   38.10
   0  15   1 1165.08   37.90
   0  15   1 1162.38   38.40
   1 -15   1  243.28    9.70
  -1 -15  -1  255.67    9.80
  -1  15  -1  262.07    9.50
  -1  15  -1  263.47    9.30
   1  15   1  262.97    9.20
   1  15   1  255.77    9.60
  -2 -15  -1    2.40    1.70
   2 -15   1   -0.20    1.50
  -2  15  -1   -0.40    1.40
   2  15   1    0.10    1.10
  -2  15  -1    0.10    1.20
   2  15   1   -0.10    1.40
  -3 -15  -1    2.60    1.40
   3 -15   1    1.10    1.40
  -3 -15  -1    0.40    1.50
   3  15   1    1.70    1.80
  -3  15  -1    2.50    1.40
  -3  15  -1    1.60    1.50
  -4 -15  -1   78.69    4.70
   4 -15   1   81.39    4.50
   4 -15   1   89.09    4.30
  -4 -15  -1   78.69    4.30
   4  15   1   92.29    5.10
  -4  15  -1   92.89    4.60
  -5 -15  -1   19.60    2.70
   5 -15   1   14.90    2.60
  -5 -15  -1   14.30    2.50
  -5  15  -1   18.80    2.70
   5  15   1   24.30    3.30
  -6 -15  -1  193.38    8.30
   6 -15   1  181.68    8.60
  -6  15  -1  183.98    8.50
   6  15   1  206.98    9.00
  -7 -15  -1   64.89    5.00
   7 -15   1   46.00    5.20
  -7  15  -1   51.69    5.50
   7  15   1   61.59    5.70
  -8 -15  -1   99.79    6.80
   8 -15   1   95.59    7.40
   8  15   1   90.39    7.60
  -8  15  -1   95.79    7.00
  -9 -15  -1   -0.50    4.50
   9  15   1   -0.30    5.20
  -9 -16   1   11.00    4.80
  -9  16   1   14.80    5.10
   8 -16  -1    4.60    4.00
  -8 -16   1   14.20    3.90
   8  16  -1    9.50    4.40
  -8  16   1    7.30    3.60
   7 -16  -1   84.39    6.30
  -7 -16   1   99.19    6.10
   7  16  -1   87.49    6.30
  -7  16   1   89.99    6.30
   6 -16  -1   12.00    3.00
  -6 -16   1    8.30    2.90
   6  16  -1    6.60    3.00
  -6  16   1   10.20    2.90
  -5 -16   1   96.39    5.20
  -5 -16   1  108.59    5.50
   5 -16  -1   98.69    5.60
  -5  16   1   92.09    5.10
   5  16  -1  114.79    5.80
  -4 -16   1  339.97   12.30
  -4 -16   1  333.67   12.50
   4 -16  -1  318.87   12.20
  -4  16   1  329.87   12.20
  -4  16   1  337.57   12.70
   4  16  -1  327.77   12.30
   3 -16  -1   50.49    3.50
  -3 -16   1   51.09    3.50
   3  16  -1   47.80    3.40
   3  16  -1   52.99    3.30
  -3  16   1   51.59    3.20
  -3  16   1   46.50    3.40
  -2 -16   1   12.80    2.00
   2 -16  -1   19.00    2.30
  -2  16   1   19.30    1.90
   2  16  -1   17.90    1.90
  -2  16   1   15.80    2.00
   2  16  -1   17.20    1.90
  -1 -16   1   38.40    3.00
   1 -16  -1   30.40    3.10
   1  16  -1   30.70    2.50
   1  16  -1   31.10    2.40
  -1  16   1   36.00    2.30
  -1  16   1   28.90    2.40
   0 -16   1   10.30    1.80
   0 -16  -1   11.20    2.00
   0  16  -1   10.60    1.40
   0  16   1   12.60    1.40
  -1 -16  -1   26.60    2.80
   1 -16   1   22.30    2.50
  -1  16  -1   26.20    2.20
  -1  16  -1   20.00    2.20
   1  16   1   22.60    2.50
   1  16   1   30.90    2.10
   2 -16   1   31.20    2.90
  -2 -16  -1   30.00    3.20
   2  16   1   34.90    2.30
  -2  16  -1   33.80    2.80
   2  16   1   26.90    2.80
  -2  16  -1   28.30    2.60
  -3 -16  -1  247.18    9.80
  -3 -16  -1  255.47    9.30
   3 -16   1  245.58    9.60
  -3  16  -1  253.37    9.70
  -3  16  -1  260.57    9.70
   3  16   1  246.28    9.70
  -4 -16  -1  412.56   15.20
   4 -16   1  420.16   14.80
  -4 -16  -1  411.36   14.80
   4 -16   1  415.46   15.10
  -4  16  -1  406.66   15.10
   4  16   1  409.16   15.20
   5 -16   1    1.50    2.10
  -5 -16  -1    2.10    2.20
  -5 -16  -1    5.20    2.30
   5  16   1    5.30    2.80
  -5  16  -1    2.30    2.10
  -6 -16  -1   13.60    2.80
   6 -16   1   17.60    3.40
   6  16   1   15.50    3.70
  -6  16  -1   15.70    3.10
  -7 -16  -1    3.50    3.20
   7 -16   1    1.60    3.50
  -7  16  -1    1.20    3.20
   7  16   1    0.10    3.30
   8 -16   1   89.19    8.00
  -8 -16  -1   85.29    6.50
  -8  16  -1   83.29    6.90
   8  16   1   93.99    8.40
  -9 -16  -1    9.30    4.70
  -9 -17   1   84.49    8.20
   8 -17  -1   19.40    5.00
  -8 -17   1   17.00    4.10
  -8  17   1   15.20    4.10
   8  17  -1   17.10    5.20
   7 -17  -1   17.80    3.80
  -7 -17   1   21.80    3.60
   7  17  -1   18.70    4.00
  -7  17   1   19.10    3.80
   6 -17  -1    5.30    2.90
  -6 -17   1   10.40    2.80
   6  17  -1    5.50    3.10
  -6  17   1    8.10    2.60
   5 -17  -1   69.59    5.10
  -5 -17   1   71.89    4.80
  -5 -17   1   71.79    4.80
   5  17  -1   78.99    5.10
  -5  17   1   70.49    4.70
  -4 -17   1   69.59    4.20
  -4 -17   1   59.09    4.40
   4 -17  -1   63.49    4.10
  -4  17   1   63.69    4.00
  -4  17   1   63.99    4.60
   4  17  -1   66.39    4.20
   3 -17  -1  293.87   11.40
  -3 -17   1  300.37   11.50
  -3  17   1  296.07   11.40
  -3  17   1  289.17   10.90
   3  17  -1  311.67   11.10
   3  17  -1  307.77   11.10
   2 -17  -1  148.79    6.70
  -2 -17   1  161.28    6.80
  -2  17   1  150.08    6.50
   2  17  -1  155.48    6.30
   2  17  -1  160.18    6.30
  -2  17   1  154.88    6.10
   1 -17  -1  479.75   17.40
  -1 -17   1  498.05   17.50
  -1  17   1  490.85   16.70
   1  17  -1  484.85   16.90
  -1  17   1  477.45   17.10
   1  17  -1  493.55   16.90
   0 -17   1    6.50    1.90
   0 -17  -1    7.80    1.90
   0  17  -1    4.00    1.30
   0  17  -1    6.80    1.40
   0  17   1    6.20    1.30
   0  17   1    5.10    1.60
  -1 -17  -1  447.26   16.60
   1 -17   1  446.96   16.40
   1  17   1  462.25   16.20
   1  17   1  480.85   15.80
  -1  17  -1  450.85   16.00
  -1  17  -1  457.95   16.00
   2 -17   1   32.10    2.90
  -2 -17  -1   39.10    3.60
  -2  17  -1   37.80    3.00
  -2  17  -1   32.50    2.70
   2  17   1   29.10    2.90
   2  17   1   33.30    2.60
   3 -17   1  540.35   18.50
  -3 -17  -1  525.25   18.80
   3  17   1  513.05   18.60
  -3  17  -1  511.55   18.40
  -3  17  -1  519.25   18.50
   4 -17   1    1.70    2.00
  -4 -17  -1    0.40    1.70
  -4 -17  -1   -1.10    2.00
   4 -17   1    0.50    2.00
   4  17   1    0.30    2.10
  -4  17  -1   -0.40    2.10
  -5 -17  -1  182.08    7.60
  -5 -17  -1  166.38    7.70
   5 -17   1  162.48    7.90
   5  17   1  181.68    8.30
  -5  17  -1  150.58    7.70
   6 -17   1   48.30    4.70
  -6 -17  -1   40.30    4.20
  -6  17  -1   52.89    5.00
   6  17   1   51.59    5.10
   7 -17   1   48.70    5.40
  -7 -17  -1   47.90    4.90
  -7  17  -1   47.70    5.10
   7  17   1   57.19    5.80
   8 -17   1    4.10    4.60
  -8 -17  -1    4.70    4.10
  -8  17  -1    7.30    4.00
   8  17   1    6.40    5.10
  -8 -18   1    8.40    4.00
   8 -18  -1   11.10    4.90
  -8  18   1   11.00    4.00
  -7 -18   1   11.40    3.40
   7 -18  -1    7.10    3.50
   7  18  -1   12.10    4.10
  -7  18   1   12.90    3.70
   6 -18  -1   23.40    3.60
  -6 -18   1   28.70    3.70
  -6  18   1   26.20    3.30
   6  18  -1   31.60    4.00
  -5 -18   1   -0.60    2.40
   5 -18  -1   -0.30    2.50
  -5 -18   1   -1.10    2.30
  -5  18   1    0.00    2.40
   5  18  -1    1.90    2.60
  -4 -18   1  251.17   10.20
   4 -18  -1  251.27   10.10
  -4  18   1  269.17   10.50
  -4  18   1  254.07    9.90
   4  18  -1  254.27   10.10
   3 -18  -1   78.59    4.60
  -3 -18   1   68.39    4.70
   3  18  -1   78.99    4.20
   3  18  -1   74.29    4.30
  -3  18   1   80.19    4.70
  -3  18   1   83.39    4.20
   2 -18  -1  233.68    9.60
  -2 -18   1  249.28    9.70
   2  18  -1  253.67    9.20
   2  18  -1  244.88    9.10
  -2  18   1  234.88    9.40
  -2  18   1  245.28    9.00
  -1 -18   1  183.38    7.80
   1 -18  -1  188.18    7.90
  -1  18   1  170.98    7.40
   1  18  -1  187.48    7.30
  -1  18   1  195.58    7.10
   1  18  -1  187.98    7.20
   0 -18  -1    7.80    2.10
   0 -18   1    1.70    1.70
   0  18  -1   10.00    1.80
   0  18   1   10.60    1.90
   0  18  -1    9.00    1.60
   0  18   1   16.70    1.70
   1 -18   1   59.39    3.80
  -1 -18  -1   61.39    4.10
   1  18   1   53.89    3.60
   1  18   1   65.49    3.20
  -1  18  -1   56.59    3.30
  -1  18  -1   63.59    3.60
   2 -18   1    3.10    1.90
  -2 -18  -1    3.30    2.20
  -2  18  -1    2.20    1.50
   2  18   1    2.70    1.40
   2  18   1    2.20    1.80
  -2  18  -1    2.20    1.50
  -3 -18  -1   43.70    3.70
   3 -18   1   40.10    3.30
   3  18   1   43.50    3.70
  -3  18  -1   38.90    3.20
   3  18   1   39.40    3.00
  -3  18  -1   41.60    3.50
  -4 -18  -1  386.16   15.00
  -4 -18  -1  406.96   14.60
   4 -18   1  413.86   14.80
   4 -18   1  409.26   14.90
   4  18   1  417.36   15.20
  -4  18  -1  394.86   14.90
  -5 -18  -1  155.68    7.20
   5 -18   1  138.39    7.30
  -5 -18  -1  145.49    6.80
  -5  18  -1  132.69    7.10
   5  18   1  151.88    7.70
   6 -18   1    1.00    3.00
  -6 -18  -1    1.70    2.70
  -6  18  -1   -3.50    2.80
   6  18   1   -2.30    3.30
   7 -18   1   10.00    3.60
  -7 -18  -1   14.20    3.70
   7  18   1   10.20    4.40
  -7  18  -1   10.50    3.80
   8 -18   1   11.30    5.20
  -8  18  -1   11.80    4.30
   8  18   1   24.10    5.80
  -8 -19   1   27.60    4.70
   8 -19  -1   34.80    5.70
  -8  19   1   31.70    4.80
   7 -19  -1  136.89    8.30
  -7 -19   1  155.78    8.30
  -7  19   1  160.58    8.30
   6 -19  -1   -0.20    2.80
  -6 -19   1    1.10    2.60
   6  19  -1   -0.90    4.40
  -6  19   1    1.50    2.50
   5 -19  -1  114.99    6.70
  -5 -19   1  121.59    6.60
  -5 -19   1  130.39    6.20
   5  19  -1  119.99    6.60
  -5  19   1  117.69    6.20
  -4 -19   1   36.80    3.60
   4 -19  -1   36.20    3.70
  -4  19   1   39.20    4.20
   4  19  -1   31.90    3.30
  -4  19   1   42.30    3.60
   4  19  -1   34.80    3.60
   3 -19  -1  131.49    6.20
  -3 -19   1  112.99    6.00
  -3  19   1  125.89    5.50
  -3  19   1  122.49    6.10
   3  19  -1  111.99    5.70
   3  19  -1  119.59    5.60
   2 -19  -1    1.20    2.10
  -2 -19   1    2.10    2.10
  -2  19   1    1.10    1.60
   2  19  -1    1.60    1.60
   2  19  -1    2.10    1.60
  -2  19   1    5.00    1.70
   1 -19  -1  178.28    7.30
  -1 -19   1  160.88    7.10
   1  19  -1  155.48    6.50
   1  19  -1  159.88    6.60
  -1  19   1  160.08    6.30
  -1  19   1  153.58    6.70
   0 -19  -1   19.90    2.70
   0 -19   1   24.90    2.80
   0  19  -1   20.70    2.30
   0  19   1   18.80    2.00
   0  19  -1   19.10    2.00
   0  19   1   17.40    2.20
   1 -19   1    1.10    2.00
  -1 -19  -1    0.10    1.90
  -1  19  -1    0.30    1.50
  -1  19  -1    2.40    1.70
   1  19   1    3.90    1.50
   1  19   1    0.70    1.70
   2 -19   1   32.30    3.20
  -2 -19  -1   33.50    3.40
  -2  19  -1   28.90    2.90
   2  19   1   39.60    2.90
   2  19   1   34.40    3.30
  -2  19  -1   34.60    3.10
  -3 -19  -1  319.67   12.70
   3 -19   1  340.87   12.60
  -3  19  -1  328.77   12.40
   3  19   1  341.07   12.60
  -3  19  -1  310.87   12.30
   3  19   1  335.47   12.00
   4 -19   1   18.90    2.70
  -4 -19  -1   20.40    2.60
  -4 -19  -1   10.50    2.50
   4 -19   1   15.80    2.60
   4  19   1   13.80    3.00
  -4  19  -1   18.40    2.70
  -5 -19  -1   54.09    4.90
  -5 -19  -1   72.89    4.60
   5 -19   1   54.99    4.60
  -5  19  -1   59.39    4.50
   5  19   1   66.59    5.10
  -6 -19  -1    0.00    2.80
   6 -19   1    0.30    3.10
  -6  19  -1    1.40    2.70
   6  19   1    0.40    3.40
   7 -19   1   27.30    4.50
   7  19   1   34.30    4.90
  -7  19  -1   32.20    4.70
   8 -19   1   42.50    6.20
  -8  19  -1   51.79    5.70
   8  19   1   62.79    7.20
   8 -20  -1  137.09    9.20
  -8 -20   1  129.69    9.00
  -8  20   1  140.99    9.10
   7 -20  -1    6.70    3.70
  -7 -20   1    5.80    3.70
  -7  20   1    8.00    3.80
   6 -20  -1   61.69    5.50
  -6 -20   1   68.99    5.60
  -6  20   1   64.59    4.90
  -5 -20   1   32.40    3.60
  -5 -20   1   26.20    3.60
   5 -20  -1   28.30    3.50
  -5  20   1   27.80    3.30
   4 -20  -1   37.20    4.00
  -4 -20   1   39.10    4.40
   4  20  -1   34.60    3.30
  -4  20   1   34.30    3.20
   4  20  -1   35.80    3.50
  -4  20   1   40.20    4.00
   3 -20  -1   60.19    4.50
  -3 -20   1   63.49    4.70
   3  20  -1   52.89    3.90
  -3  20   1   55.99    3.80
  -3  20   1   59.99    4.20
   3  20  -1   52.59    4.00
   2 -20  -1   11.70    2.60
  -2 -20   1    6.00    2.30
  -2  20   1    9.70    2.30
   2  20  -1    6.90    1.90
   2  20  -1    8.80    2.00
  -1 -20   1   22.30    2.80
   1 -20  -1   20.50    2.80
  -1  20   1   20.20    2.60
   1  20  -1   24.30    2.50
   1  20  -1   20.90    2.20
  -1  20   1   24.00    2.40
   0 -20   1  415.16   15.30
   0 -20  -1  421.86   15.40
   0  20  -1  409.96   14.60
   0  20  -1  407.56   14.70
   0  20   1  411.76   14.90
   0  20   1  407.76   14.40
   1 -20   1   33.00    3.30
  -1 -20  -1   34.60    3.60
  -1  20  -1   39.50    3.20
  -1  20  -1   30.40    2.90
   1  20   1   30.60    2.80
   1  20   1   30.60    3.20
  -2 -20  -1   54.49    4.20
   2 -20   1   56.39    4.00
  -2  20  -1   46.90    3.60
  -2  20  -1   54.09    3.80
   2  20   1   62.39    3.40
   2  20   1   52.89    3.90
  -3 -20  -1    2.40    2.50
   3 -20   1    3.20    2.10
   3  20   1    5.50    1.90
   3  20   1    2.80    2.30
  -3  20  -1    6.50    2.30
  -3  20  -1    2.20    2.30
  -4 -20  -1   92.79    5.90
   4 -20   1   88.89    5.20
   4 -20   1   91.69    5.40
   4  20   1   93.89    5.80
   4  20   1   97.49    5.00
  -4  20  -1   84.19    5.50
  -5 -20  -1   15.60    3.30
   5 -20   1   15.00    3.20
   5  20   1   25.30    3.60
  -5  20  -1   12.80    2.90
   6 -20   1   21.70    4.00
   6  20   1   20.60    4.30
  -6  20  -1   22.00    3.50
   7 -20   1   24.90    4.40
  -7  20  -1   17.30    4.00
   7  20   1   23.80    5.00
   8 -20   1   16.80    5.50
  -8  20  -1   10.50    5.10
   8  20   1   20.10    6.30
   8 -21  -1    2.70    4.50
  -8 -21   1    4.00    4.90
  -8  21   1    2.30    4.70
  -7 -21   1    6.00    3.90
   7 -21  -1    7.30    4.20
  -7  21   1   11.80    3.60
   6 -21  -1    2.50    3.50
  -6 -21   1    5.90    3.30
  -6  21   1    4.20    3.10
   5 -21  -1    1.40    2.90
  -5 -21   1   -1.90    2.70
   5  21  -1    2.80    2.70
  -5  21   1    2.00    2.60
  -4 -21   1    7.30    2.70
   4 -21  -1   16.70    3.00
  -4  21   1    9.80    2.90
  -4  21   1   12.60    2.50
   4  21  -1   11.60    2.60
  -3 -21   1   12.60    2.70
   3 -21  -1   14.10    2.90
  -3  21   1   10.40    2.30
  -3  21   1   16.10    2.70
   3  21  -1   11.90    2.30
   2 -21  -1    9.10    2.50
  -2 -21   1    7.80    2.40
  -2  21   1    9.70    2.10
   2  21  -1    9.70    2.20
  -2  21   1   10.70    2.30
   2  21  -1   16.10    2.40
   1 -21  -1   28.70    3.20
  -1 -21   1   24.80    3.10
   1  21  -1   25.30    2.80
  -1  21   1   27.80    3.20
  -1  21   1   33.50    2.70
   1  21  -1   30.60    3.00
   0 -21  -1   27.30    3.10
   0 -21   1   20.00    2.80
   0  21  -1   23.50    2.40
   0  21  -1   27.00    2.60
   0  21   1   18.60    2.10
   0  21   1   13.40    2.10
   1 -21   1  129.39    6.50
  -1 -21  -1  114.79    6.30
   1  21   1  124.69    5.90
   1  21   1  130.99    5.50
  -1  21  -1  121.79    5.60
  -1  21  -1  127.99    5.80
   2 -21   1   14.50    2.60
  -2 -21  -1   17.60    2.90
  -2  21  -1   18.80    2.60
   2  21   1   28.70    4.10
  -2  21  -1   15.20    2.40
   2  21   1   20.90    2.80
  -3 -21  -1   62.49    4.80
   3 -21   1   63.59    4.80
  -3  21  -1   66.09    4.60
  -3  21  -1   70.59    4.60
   3  21   1   68.89    4.70
   4 -21   1  434.96   15.10
  -4 -21  -1  391.26   15.20
   4 -21   1  397.86   15.00
   4  21   1  386.66   15.10
  -4  21  -1  377.66   14.80
   5 -21   1  133.69    7.20
  -5 -21  -1  124.39    7.20
   5  21   1  132.59    7.60
  -5  21  -1  123.09    7.00
   6 -21   1   -0.20    2.90
   6  21   1   -0.50    3.60
  -6  21  -1    5.10    3.30
   7 -21   1   57.09    5.90
  -7  21  -1   46.00    5.10
   7  21   1   54.19    6.20
   8 -21   1    4.90    4.70
  -8  21  -1    2.60    4.40
  -7 -22   1   56.49    5.90
   7 -22  -1   55.29    5.80
  -7  22   1   54.49    6.10
   6 -22  -1   10.70    3.60
   6  22  -1   20.00    3.50
  -6  22   1   21.50    3.70
  -5 -22   1    4.30    3.00
   5 -22  -1    6.60    2.90
   5  22  -1    0.00    2.70
  -5  22   1    1.10    2.40
   4 -22  -1   59.59    4.60
  -4 -22   1   43.30    5.00
  -4  22   1   57.89    4.30
  -4  22   1   59.49    5.20
   4  22  -1   52.79    4.40
   3 -22  -1    6.10    2.90
  -3 -22   1    6.30    2.60
  -3  22   1   10.90    2.40
  -3  22   1    8.80    2.70
   3  22  -1    8.60    2.40
  -2 -22   1  143.79    7.10
   2 -22  -1  143.09    7.10
   2  22  -1  137.59    6.50
  -2  22   1  151.38    6.90
   1 -22  -1  100.49    6.10
  -1 -22   1  107.69    5.90
   1  22  -1   99.69    5.10
  -1  22   1  111.39    5.60
   0 -22   1  226.48    9.50
   0 -22  -1  227.18    9.60
   0  22   1  231.38    9.10
   0  22  -1  228.58    8.90
   0  22  -1  210.38    8.80
   1 -22   1   55.89    4.60
  -1 -22  -1   42.60    4.20
   1  22   1   39.40    3.80
  -1  22  -1   40.30    3.70
  -1  22  -1   48.70    3.80
  -2 -22  -1    4.70    2.50
   2 -22   1   -0.30    2.10
  -2  22  -1    0.40    2.00
  -2  22  -1    0.50    2.10
   2  22   1   -1.00    2.10
  -3 -22  -1  136.49    7.00
   3 -22   1  129.69    6.70
  -3  22  -1  135.99    6.60
   3  22   1  134.19    6.90
  -3  22  -1  137.59    6.70
  -4 -22  -1  193.18    8.90
   4 -22   1  191.98    8.70
   4 -22   1  185.48    8.50
   4  22   1  187.08    8.80
  -4  22  -1  179.98    8.50
  -5 -22  -1   -0.90    3.00
   5 -22   1   -1.60    2.90
  -5  22  -1    0.40    2.90
   5  22   1    0.90    3.30
   6 -22   1  125.79    7.80
   6  22   1  123.19    8.10
  -6  22  -1  122.79    7.20
   7 -22   1   -0.40    4.30
  -7  22  -1    3.40    4.20
   7 -23  -1   14.50    4.90
   6 -23  -1   83.39    7.10
   6  23  -1   74.19    6.40
  -5 -23   1   30.90    4.20
   5  23  -1   38.60    4.10
  -4 -23   1  125.39    7.10
   4 -23  -1  133.79    7.30
   4  23  -1  135.59    6.80
  -4  23   1  143.39    7.50
   3 -23  -1   -1.60    2.70
  -3 -23   1   -0.50    2.40
  -3  23   1    0.50    2.60
   3  23  -1   -0.30    2.20
   2 -23  -1   52.29    4.70
  -2 -23   1   66.89    4.90
  -2  23   1   70.79    4.90
   2  23  -1   59.29    4.20
  -1 -23   1  103.99    5.90
   1 -23  -1   90.79    6.10
   1  23  -1  100.89    5.20
  -1  23   1   99.29    5.50
   0 -23   1   57.09    4.60
   0 -23  -1   51.39    4.50
   0  23  -1   47.10    3.90
   0  23   1   52.79    3.90
  -1 -23  -1   25.00    3.40
   1 -23   1   32.50    3.50
   1  23   1   25.70    3.00
  -1  23  -1   32.50    3.10
   2 -23   1    0.70    2.30
  -2 -23  -1   -0.20    2.50
   2  23   1   -1.00    2.30
  -2  23  -1   -0.20    2.20
  -2  23  -1    0.70    2.20
   3 -23   1    5.70    2.60
  -3 -23  -1    7.60    3.10
  -3  23  -1    6.90    2.70
  -3  23  -1    6.90    2.60
   3  23   1    9.30    2.60
  -4 -23  -1  625.14   22.70
   4 -23   1  590.14   22.00
  -4  23  -1  618.54   22.10
   4  23   1  621.14   22.40
  -5 -23  -1   -2.30    3.20
   5 -23   1   -2.40    3.00
  -5  23  -1   -2.00    2.70
   5  23   1    0.80    3.20
   6 -23   1   49.70    5.20
  -6  23  -1   30.80    4.60
   7 -23   1   26.70    5.30
  -7  23  -1   25.50    5.10
   7 -24  -1  303.37   13.80
   6 -24  -1    1.10    4.10
  -5 -24   1    9.40    3.70
   5  24  -1   14.50    4.50
  -4 -24   1   59.59    5.30
   4 -24  -1   59.19    5.60
  -4  24   1   64.29    5.70
   4  24  -1   53.99    4.50
   3 -24  -1   22.90    3.40
  -3 -24   1   21.40    3.50
  -3  24   1   18.70    3.10
   3  24  -1   21.60    3.10
   2 -24  -1   14.30    3.10
  -2 -24   1   17.40    3.20
  -2  24   1   18.90    3.10
   2  24  -1   14.50    2.70
  -1 -24   1   89.69    5.70
   1 -24  -1   83.19    5.60
  -1  24   1   87.39    5.40
   1  24  -1   81.89    4.90
   0 -24   1  198.08    9.10
   0 -24  -1  208.88    9.30
   0  24  -1  202.38    8.40
   0  24   1  206.48    8.80
  -1 -24  -1  297.57   12.40
   1 -24   1  293.07   12.30
  -1  24  -1  307.47   11.70
   1  24   1  314.67   11.90
   2 -24   1    6.50    2.80
  -2 -24  -1    4.80    2.90
   2  24   1   11.90    2.80
  -2  24  -1   11.20    2.60
   3 -24   1   25.10    3.50
  -3 -24  -1   22.00    3.60
   3  24   1   22.50    3.40
  -3  24  -1   18.00    2.90
   4 -24   1  130.19    7.10
  -4 -24  -1  137.79    7.60
  -4  24  -1  132.09    7.20
   4  24   1  135.09    7.40
  -5 -24  -1   19.00    4.00
   5 -24   1   11.50    3.50
  -5  24  -1   12.80    3.20
   6 -24   1   22.40    4.50
  -6  24  -1   21.40    4.40
   7 -24   1   14.80    5.10
  -7  24  -1   13.20    4.70
   7 -25  -1   32.90    5.80
   6 -25  -1   26.90    5.00
  -5 -25   1    3.90    3.50
   4 -25  -1   38.90    4.50
  -4 -25   1   29.90    4.20
  -4  25   1   30.30    4.20
   3 -25  -1   45.40    4.90
  -3 -25   1   44.50    5.00
  -3  25   1   51.19    5.10
  -2 -25   1  140.09    7.60
   2 -25  -1  153.38    7.70
  -2  25   1  149.79    7.40
   2  25  -1  141.09    6.90
  -1 -25   1    9.30    3.00
   1 -25  -1   16.30    3.30
   1  25  -1    9.00    2.60
  -1  25   1   15.10    2.90
   0 -25   1   29.00    3.70
   0 -25  -1   31.20    3.90
   0  25   1   30.40    3.40
   0  25  -1   33.20    3.30
   1 -25   1  253.57   11.20
  -1 -25  -1  262.77   11.40
   1  25   1  278.87   10.90
  -1  25  -1  262.17   10.50
   2 -25   1    3.00    2.80
  -2 -25  -1    2.70    2.90
  -2  25  -1   -2.00    2.40
   2  25   1   -0.80    2.60
   3 -25   1   90.69    6.00
  -3 -25  -1   88.09    6.30
  -3  25  -1   81.99    5.70
  -4 -25  -1   22.50    4.20
  -4  25  -1   19.50    3.40
  -5 -25  -1    4.90    3.70
  -5  25  -1    5.00    3.10
  -6  25  -1   31.90    4.90
  -7  25  -1    8.20    4.40
   7 -26  -1   -0.40    5.20
   6 -26  -1   32.80    5.30
  -5 -26   1   18.80    4.10
   4 -26  -1  113.49    7.20
  -4 -26   1   98.99    7.40
  -4  26   1  106.69    6.70
  -3 -26   1  309.57   13.50
   3 -26  -1  342.67   13.60
  -3  26   1  330.07   13.30
  -2 -26   1   92.09    6.80
   2 -26  -1   90.09    6.20
  -2  26   1  101.69    6.10
   1 -26  -1  223.78   10.40
  -1 -26   1  242.18   10.80
  -1  26   1  232.58    9.90
   0 -26  -1   95.79    6.30
   0 -26   1  102.19    6.30
   0  26   1   93.39    5.80
  -1 -26  -1   49.40    5.10
   1 -26   1   49.80    5.00
   1  26   1   57.29    5.50
  -2 -26  -1   18.00    3.60
   2 -26   1   20.90    3.60
  -2  26  -1   21.90    4.60
   3 -26   1   15.40    3.50
  -3 -26  -1   14.40    4.00
  -3  26  -1   17.10    3.60
  -4 -26  -1   23.30    4.10
  -4  26  -1   25.30    4.20
  -5 -26  -1  216.58   10.20
  -5  26  -1  179.68   11.90
   6 -27  -1   -0.50    4.60
  -5 -27   1  170.68    9.60
   5 -27  -1  164.88    8.80
  -4 -27   1   33.70    5.00
   4 -27  -1   39.50    5.60
  -4  27   1   38.60    4.80
  -3 -27   1   24.20    4.10
   3 -27  -1   39.20    4.40
  -3  27   1   25.30    3.80
  -2 -27   1    6.20    3.20
   2 -27  -1    9.90    3.40
  -2  27   1    8.00    3.10
  -1 -27   1    8.10    3.30
   1 -27  -1    6.50    3.20
   0 -27   1   38.80    4.60
   0 -27  -1   47.10    5.10
   1 -27   1   11.60    3.60
  -1 -27  -1    8.00    3.40
  -2 -27  -1   13.30    3.90
   2 -27   1   12.30    3.80
  -3 -27  -1    5.80    3.40
   3 -27   1    4.30    3.20
  -4 -27  -1   56.49    5.90
  -5 -27  -1   74.29    7.60
   6 -28  -1  105.79   10.50
   5 -28  -1  192.48   11.00
  -5 -28   1  214.88   11.10
  -4 -28   1   18.50    4.60
  -3 -28   1    2.00    3.50
   3 -28  -1    2.70    3.70
  -2 -28   1  192.18    9.70
   2 -28  -1  187.58    9.60
   1 -28  -1   24.00    4.10
  -1 -28   1   21.90    3.90
   0 -28  -1    9.10    3.30
   0 -28   1    3.30    3.10
  -1 -28  -1  239.18   11.10
   1 -28   1  232.38   10.80
  -2 -28  -1  294.47   13.00
   2 -28   1  300.57   12.80
  -3 -28  -1   58.39    6.20
   3 -28   1   55.99    5.80
  -4 -28  -1   15.50    4.20
  -5 -28  -1    3.60    4.50
  -5 -29   1   41.20    5.90
  -4 -29   1  139.09    9.30
  -3 -29   1    2.10    3.70
   3 -29  -1    0.40    4.00
   2 -29  -1  116.09    7.60
  -2 -29   1  110.49    7.60
   1 -29  -1   87.39    6.80
  -1 -29   1   82.89    7.20
   0 -29  -1   81.89    6.70
   0 -29   1   85.99    6.60
  -1 -29  -1   21.40    4.30
   1 -29   1   35.00    4.80
   2 -29   1   25.50    4.30
  -2 -29  -1   10.90    4.00
  -3 -29  -1  136.39    8.80
   3 -29   1  158.48    9.10
  -4 -29  -1  110.69    8.80
  -5 -29  -1   27.50    5.10
  -5 -30   1   13.90    5.50
  -4 -30   1  148.19    9.30
  -3 -30   1   -0.30    4.40
   3 -30  -1   -0.20    4.20
  -2 -30   1  353.56   15.70
   2 -30  -1  374.26   15.50
  -1 -30   1   13.10    4.00
   1 -30  -1    8.60    3.90
   0 -30  -1    3.00    3.70
   0 -30   1    7.80    3.70
  -1 -30  -1    0.70    3.70
   1 -30   1    1.80    3.60
   2 -30   1   41.70    5.40
  -2 -30  -1   36.60    5.20
  -3 -30  -1    6.70    4.60
   3 -30   1    4.60    4.10
  -4 -30  -1   39.10    5.50
  -5 -30  -1    5.10    5.30
  -5 -31   1   24.50    5.90
  -4 -31   1    4.80    4.60
  -3 -31   1    1.70    4.20
   3 -31  -1    6.70    4.80
   2 -31  -1    4.30    3.90
  -2 -31   1    4.50    4.20
   1 -31  -1   39.30    5.30
  -1 -31   1   27.00    4.80
   0 -31   1    9.40    4.20
   0 -31  -1    5.90    4.10
  -1 -31  -1   81.29    7.40
   1 -31   1   70.09    6.90
   2 -31   1    5.80    4.10
  -2 -31  -1    9.50    4.30
   3 -31   1   94.19    7.50
  -3 -31  -1   58.79    6.50
  -4 -31  -1    7.20    4.80
  -5 -31  -1    5.50    5.40
  -4 -32   1   48.50    6.30
   3 -32  -1   35.40    6.00
  -3 -32   1   21.90    5.30
  -2 -32   1    0.40    4.20
   2 -32  -1   -1.00    4.20
   1 -32  -1    3.00    4.20
  -1 -32   1   -0.20    4.10
   0 -32  -1  139.99    9.10
   0 -32   1  119.29    9.40
  -1 -32  -1   72.59    7.40
   1 -32   1   57.59    6.20
  -2 -32  -1   96.19    8.20
   2 -32   1   91.99    7.90
  -3 -32  -1   81.29    8.00
   3 -32   1   75.39    8.50
  -4 -32  -1    8.60    6.30
   3 -33  -1   34.30    6.40
  -3 -33   1   23.00    8.80
   2 -33  -1   15.10    5.00
  -2 -33   1   19.20    5.20
   1 -33  -1   46.60    6.30
  -1 -33   1   62.19    6.60
   0 -33  -1   27.50    5.50
   0 -33   1   28.30    5.50
  -1 -33  -1   11.90    5.00
   1 -33   1   14.70    5.00
   2 -33   1   33.30    6.40
  -2 -33  -1   40.10    6.40
   3 -33   1   55.99    7.00
   3 -34  -1    2.00    5.20
   2 -34  -1    2.30    4.90
   1 -34  -1   76.69    8.50
   0 -34  -1    1.90    4.90
   0 -34   1    1.60    5.50
   1 -34   1    4.10    4.80
   2 -34   1   21.30    5.60
   3 -34   1    6.50    5.30
  10   0  -2    9.20    6.10
   9   0  -2   87.79    6.90
  -9   0   2   84.19    6.50
   8   0  -2  219.78   10.10
  -8   0   2  223.18    9.80
   7   0  -2  728.23   26.10
  -7   0   2  737.43   25.80
  -6   0   2  806.92   27.50
   6   0  -2  781.82   27.60
   5   0  -2   23.90    2.50
  -5   0   2   24.30    2.40
   4   0  -2 2372.46   79.89
  -4   0   2 2373.06   79.79
  -4   0   2 2492.85   79.19
  -3   0   2 1832.52   61.29
   3   0  -2 1842.92   61.29
  -3   0   2 1888.31   60.99
  -2   0   2  125.69    4.50
  -2   0   2  121.69    4.60
  -2   0   2  128.09    4.70
  -1   0   2 3064.99   99.19
  -1   0   2 2981.30   98.99
  -1   0   2 3018.60   99.19
   0   0   2    2.70    0.60
   0   0  -2    2.50    0.50
   0   0   2    1.50    0.50
  -1   0  -2 5216.38  174.18
   1   0   2 5592.44  174.58
   1   0   2 5138.59  174.28
   2   0   2  206.08    6.90
  -2   0  -2  198.88    7.20
   2   0   2  197.28    7.30
  -3   0  -2  645.04   20.80
   3   0   2  629.74   21.50
  -3   0  -2  607.74   21.30
  -4   0  -2 3124.19   99.19
   4   0   2 2970.20  100.19
  -4   0  -2 2990.50   99.99
  -5   0  -2    8.20    1.80
   5   0   2    8.30    2.00
   6   0   2   46.50    4.20
  -6   0  -2   62.89    4.00
   7   0   2   28.10    4.00
  -7   0  -2   24.10    3.20
  -8   0  -2   67.99    5.50
   8   0   2   82.79    6.90
   9   0   2   40.20    5.60
  -9   0  -2   58.59    5.80
  10  -1  -2   11.60    6.00
  10   1  -2   20.80    5.50
  -9  -1   2  137.59    8.30
   9  -1  -2  132.19    8.80
  -9   1   2  133.99    8.30
   9   1  -2  130.39    8.20
   8  -1  -2  185.18    9.10
  -8  -1   2  196.78    9.10
  -8   1   2  179.98    8.80
   8   1  -2  201.48    9.20
   7  -1  -2   26.90    3.40
  -7  -1   2   24.40    3.10
  -7   1   2   26.60    3.20
   7   1  -2   25.90    3.30
   6  -1  -2   70.99    4.40
  -6  -1   2   66.19    4.40
  -6   1   2   67.79    4.10
   6   1  -2   68.19    4.30
  -5  -1   2  100.09    4.50
   5  -1  -2   88.29    4.60
   5   1  -2   93.79    4.60
  -5   1   2  100.99    4.70
  -4  -1   2  491.35   16.60
  -4  -1   2  478.15   16.00
   4  -1  -2  461.95   16.70
   4   1  -2  484.55   16.70
  -4   1   2  479.25   16.60
  -3  -1   2 2971.50   96.19
   3  -1  -2 2848.52   96.59
  -3  -1   2 2916.41   96.49
   3   1  -2 2901.41   96.49
  -3   1   2 2899.71   96.49
  -3   1   2 3053.99   96.19
  -2  -1   2  233.78    7.90
  -2  -1   2  225.38    7.80
   2   1  -2  224.38    7.90
  -2   1   2  232.08    7.80
  -2   1   2  217.68    7.90
  -1  -1   2 1599.74   52.49
  -1  -1   2 1572.34   52.49
  -1  -1   2 1578.84   52.49
  -1   1   2 1612.54   52.49
  -1   1   2 1625.54   52.59
   0  -1  -2  683.83   23.00
   0  -1   2  717.33   23.00
   0  -1   2  671.53   23.10
   0   1   2  706.13   23.10
   0   1  -2  701.13   23.10
   0   1   2  707.43   23.10
   1  -1   2 1591.04   51.89
   1  -1   2 1545.25   51.99
  -1  -1  -2 1598.04   51.89
  -1   1  -2 1574.14   51.99
   1   1   2 1605.54   51.89
   1   1   2 1560.84   51.99
   2  -1   2    1.60    0.90
  -2  -1  -2    1.10    0.60
  -2  -1  -2    1.50    0.80
   2  -1   2    1.80    0.60
  -2   1  -2    1.20    0.80
   2   1   2    4.30    1.00
  -3  -1  -2   54.49    2.30
   3  -1   2   56.39    2.90
  -3  -1  -2   50.19    2.60
  -3   1  -2   57.09    2.20
  -3   1  -2   47.90    2.70
   3   1   2   49.80    2.90
   4  -1   2    7.80    1.60
  -4  -1  -2    7.30    0.90
  -4  -1  -2    6.10    1.40
  -4   1  -2    8.30    1.50
   4   1   2    9.50    1.90
  -4   1  -2    7.90    0.70
   5  -1   2  910.91   31.50
  -5  -1  -2  931.11   31.30
  -5   1  -2  915.41   31.30
   5   1   2  915.61   31.60
  -6  -1  -2    3.80    2.00
   6  -1   2    1.30    2.20
  -6   1  -2    0.10    1.90
   6   1   2    0.70    2.20
   7  -1   2   33.90    4.10
  -7  -1  -2   46.40    4.20
   7   1   2   48.60    4.70
  -7   1  -2   46.30    4.60
  -8  -1  -2   36.90    4.20
   8  -1   2   42.40    5.00
  -8   1  -2   49.90    4.90
   8   1   2   48.90    5.20
  -9  -1  -2   79.89    6.70
   9  -1   2   85.29    7.50
   9   1   2   95.29    7.80
  -9   1  -2   82.69    6.90
  10   2  -2   17.60    5.40
   9  -2  -2  336.97   14.40
  -9  -2   2  311.67   13.40
  -9   2   2  314.97   13.50
   9   2  -2  329.47   14.40
   8  -2  -2   53.99    5.10
  -8  -2   2   59.59    5.30
   8   2  -2   61.99    5.30
  -8   2   2   51.49    4.90
  -7  -2   2   91.09    5.50
   7  -2  -2   76.59    5.30
  -7   2   2   78.89    5.10
   7   2  -2   89.99    5.40
  -6  -2   2  457.15   16.80
   6  -2  -2  458.75   16.90
   6   2  -2  471.95   17.00
  -6   2   2  477.05   16.80
   5  -2  -2   25.10    2.60
  -5  -2   2   35.30    2.60
  -5   2   2   29.20    2.50
   5   2  -2   25.80    2.60
  -4  -2   2    1.00    0.70
   4  -2  -2    1.80    1.20
  -4  -2   2   -0.70    1.10
   4  -2  -2    0.20    0.70
   4   2  -2   -0.20    1.20
  -4   2   2    1.00    1.10
  -3  -2   2  158.88    6.00
   3  -2  -2  165.68    5.70
   3  -2  -2  150.28    6.10
  -3  -2   2  166.38    5.70
   3   2  -2  159.78    6.00
  -3   2   2  159.48    6.00
  -2  -2   2  118.49    4.50
  -2  -2   2  123.09    4.40
   2   2  -2  118.99    4.50
  -2   2   2  119.19    4.50
  -2   2   2  126.09    4.40
  -1  -2   2  193.88    6.80
  -1  -2   2  189.68    6.80
  -1  -2   2  201.78    6.70
  -1   2   2  193.38    6.80
  -1   2   2  201.38    6.70
  -1   2   2  196.88    6.90
   0  -2  -2  692.83   22.80
   0  -2   2  699.43   23.10
   0  -2   2  687.53   22.80
   0   2  -2  699.93   23.00
   0   2   2  703.53   23.10
   0   2   2  685.03   23.10
   1  -2   2  222.08    7.50
  -1  -2  -2  210.18    7.50
   1  -2   2  221.48    7.50
  -1  -2  -2  221.08    7.40
  -1   2  -2  209.88    7.50
   1   2   2  216.18    7.60
  -2  -2  -2  339.87   11.70
  -2  -2  -2  343.37   11.60
   2  -2   2  353.26   11.50
   2  -2   2  336.27   11.80
  -2   2  -2  344.87   11.80
   2   2   2  331.07   11.90
   3  -2   2   32.70    2.20
  -3  -2  -2   34.10    1.70
   3  -2   2   30.70    1.50
  -3  -2  -2   23.80    1.90
  -3   2  -2   26.20    2.00
   3   2   2   32.50    2.30
  -4  -2  -2    1.40    0.80
   4  -2   2    0.60    1.30
  -4  -2  -2    1.10    1.20
  -4   2  -2    0.30    1.20
  -4   2  -2    1.30    0.50
   4   2   2    1.60    1.50
   5  -2   2   56.19    3.70
  -5  -2  -2   51.49    3.40
   5   2   2   58.39    3.80
  -5   2  -2   57.69    3.50
   6  -2   2  217.18    9.40
  -6  -2  -2  232.28    9.10
  -6   2  -2  225.08    9.20
   6   2   2  219.48    9.60
   7  -2   2   83.59    5.80
  -7  -2  -2   89.39    5.30
   7   2   2   84.59    5.70
  -7   2  -2   71.99    5.10
   8  -2   2    8.30    3.60
  -8  -2  -2   11.50    3.20
   8   2   2    7.00    3.90
  -8   2  -2   10.10    3.50
  -9  -2  -2    1.80    3.70
   9  -2   2    0.70    4.00
  -9   2  -2    1.60    4.20
   9   2   2    3.60    4.80
  10   3  -2   10.40    5.10
   9  -3  -2  141.19    8.40
  -9  -3   2  140.99    8.00
  -9   3   2  116.29    7.80
   9   3  -2  150.98    9.10
   8  -3  -2    2.60    2.90
  -8  -3   2    2.40    2.90
   8   3  -2    6.50    3.40
  -8   3   2    4.30    3.10
   7  -3  -2  762.22   26.90
  -7  -3   2  767.42   26.70
   7   3  -2  741.23   26.90
  -7   3   2  766.02   26.60
   6  -3  -2   47.10    3.70
  -6  -3   2   37.80    3.30
  -6   3   2   43.70    3.40
   6   3  -2   48.70    3.70
   5  -3  -2    7.80    1.80
  -5  -3   2    9.00    1.30
  -5  -3   2    9.50    1.70
  -5   3   2    7.50    1.70
   5   3  -2    8.10    1.80
   4  -3  -2   95.09    3.60
   4  -3  -2   89.59    4.30
  -4  -3   2   99.19    3.70
  -4  -3   2   94.89    4.20
  -4   3   2   95.09    4.20
   4   3  -2   90.09    4.30
   3  -3  -2 1074.59   34.60
  -3  -3   2 1019.40   34.90
  -3  -3   2 1053.69   34.70
   3   3  -2 1016.10   34.90
  -3   3   2 1045.60   35.10
  -3   3   2 1073.49   34.90
  -2  -3   2 3754.62  122.09
  -2  -3   2 3721.93  122.19
   2  -3  -2 3766.42  122.09
   2   3  -2 3790.52  122.09
  -2   3   2 3699.43  122.09
  -2   3   2 3610.64  122.29
   1  -3  -2    5.00    0.70
  -1  -3   2    5.30    0.80
  -1  -3   2    6.00    0.80
   1   3  -2    4.40    0.50
  -1   3   2    6.40    0.60
  -1   3   2    4.10    0.80
   0  -3   2  408.96   13.70
   0  -3  -2  405.56   13.40
   0  -3   2  411.16   13.40
   0  -3  -2  411.46   13.70
   0   3   2  399.16   13.70
   0   3  -2  407.56   13.70
   1  -3   2 3106.99  101.59
  -1  -3  -2 3160.78  101.49
  -1  -3  -2 3109.19  101.69
   1  -3   2 3207.58  101.59
   1   3   2 3064.49  101.79
  -1   3  -2 2943.61  101.69
   2  -3   2 2535.95   86.09
  -2  -3  -2 2671.33   85.89
  -2  -3  -2 2651.93   85.99
   2  -3   2 2700.53   85.79
  -2   3  -2 2593.34   86.09
   2   3   2 2543.45   86.19
  -3  -3  -2  759.92   27.00
   3  -3   2  811.92   27.20
   3  -3   2  824.62   26.60
  -3  -3  -2  835.72   26.80
   3   3   2  788.42   27.30
  -3   3  -2  805.22   27.10
  -4  -3  -2  253.67    8.40
  -4  -3  -2  233.08    8.90
   4  -3   2  233.78    9.10
   4   3   2  231.78    9.30
  -4   3  -2  229.08    9.00
  -4   3  -2  255.47    8.10
   5  -3   2    2.90    1.70
  -5  -3  -2    2.20    1.50
   5   3   2    1.40    1.80
  -5   3  -2    2.80    1.70
  -6  -3  -2  420.56   15.50
   6  -3   2  438.76   15.90
  -6   3  -2  408.46   15.50
   6   3   2  426.36   16.00
   7  -3   2    2.30    2.80
  -7  -3  -2    1.20    2.30
   7   3   2    0.60    3.00
  -7   3  -2    0.80    2.60
   8  -3   2   28.90    4.40
  -8  -3  -2   28.20    4.10
  -8   3  -2   21.50    3.70
   8   3   2   26.90    4.70
   9  -3   2    5.40    4.60
  -9  -3  -2   13.40    4.00
   9   3   2   15.60    4.90
  -9   3  -2   12.40    4.10
  10   4  -2    0.00    4.70
  -9  -4   2  114.09    7.30
   9  -4  -2  111.29    8.30
  -9   4   2  107.89    7.20
   9   4  -2  125.39    7.90
  -8  -4   2   -2.20    2.80
   8  -4  -2    1.30    2.90
   8   4  -2   -2.90    2.80
  -8   4   2    2.00    2.80
  -7  -4   2    1.30    2.20
   7  -4  -2   -0.10    2.30
   7   4  -2    3.50    2.70
  -7   4   2    1.90    2.20
   6  -4  -2  643.54   22.60
  -6  -4   2  626.14   22.40
   6   4  -2  621.34   22.50
  -6   4   2  665.83   22.40
   5  -4  -2  866.21   30.70
  -5  -4   2  935.61   29.90
  -5  -4   2  879.51   30.50
  -5   4   2  901.31   30.50
   5   4  -2  898.81   30.60
  -4  -4   2    6.90    1.00
  -4  -4   2    4.70    1.30
   4  -4  -2    6.80    1.50
   4  -4  -2    5.90    0.90
   4   4  -2    4.60    1.30
  -4   4   2    5.00    1.30
  -3  -4   2  970.30   31.70
  -3  -4   2  953.20   32.00
   3  -4  -2  973.70   31.60
  -3   4   2  956.00   31.90
   3   4  -2  939.41   31.90
  -3   4   2  936.01   32.10
  -2  -4   2  281.37    9.40
   2  -4  -2  275.27    9.40
  -2  -4   2  262.77    9.40
  -2   4   2  275.77    9.60
   2   4  -2  270.87    9.30
  -2   4   2  265.07    9.30
  -1  -4   2  310.97   10.80
   1  -4  -2  306.07   10.70
   1   4  -2  324.17   10.40
   1   4  -2  316.87   10.70
  -1   4   2  319.77   10.50
  -1   4   2  306.17   10.80
   0  -4  -2 2825.42   92.59
   0  -4   2 2880.81   92.59
   0  -4   2 2703.83   92.29
   0   4   2 2821.92   92.59
   0   4  -2 2869.01   92.49
  -1  -4  -2 1806.52   57.59
   1  -4   2 1746.23   57.69
   1  -4   2 1755.62   57.79
  -1  -4  -2 1732.83   57.89
  -1   4  -2 1703.53   57.89
   1   4   2 1793.62   57.99
  -2  -4  -2  358.06   11.90
   2  -4   2  352.16   11.80
   2  -4   2  349.37   12.00
  -2  -4  -2  353.36   11.90
   2   4   2  351.46   12.20
  -2   4  -2  330.27   12.10
  -3  -4  -2 2827.92   91.59
   3  -4   2 2814.62   91.39
   3  -4   2 2792.42   91.89
  -3  -4  -2 2839.62   91.79
   3   4   2 2716.53   91.99
  -3   4  -2 2725.63   91.89
   4  -4   2   27.10    2.40
  -4  -4  -2   25.40    1.80
  -4  -4  -2   21.00    2.00
   4  -4   2   23.60    1.30
   4   4   2   24.40    2.50
  -4   4  -2   18.30    2.00
   5  -4   2   -0.30    1.60
  -5  -4  -2    0.20    1.50
   5   4   2   -0.80    1.90
  -5   4  -2    1.10    1.60
   6  -4   2   33.60    3.70
  -6  -4  -2   34.50    3.70
  -6   4  -2   27.90    3.00
   6   4   2   31.50    3.60
  -7  -4  -2  193.68    8.60
   7  -4   2  197.78    9.20
   7   4   2  211.08    9.40
  -7   4  -2  194.48    8.90
  -8  -4  -2    0.20    2.80
   8  -4   2    2.50    3.50
  -8   4  -2    0.60    3.20
   8   4   2    0.90    3.30
  -9  -4  -2    8.40    3.90
   9  -4   2    3.80    4.80
   9   4   2    5.90    4.60
  -9   4  -2    7.80    4.00
  10   5  -2   17.30    5.60
   9  -5  -2    5.50    3.80
  -9  -5   2   11.10    4.20
  -9   5   2    8.30    4.00
   9   5  -2    9.80    4.00
  -8  -5   2   97.59    5.90
   8  -5  -2   84.09    6.10
  -8   5   2   77.89    5.60
   8   5  -2   89.69    6.20
  -7  -5   2   42.10    4.00
   7  -5  -2   46.40    4.30
   7   5  -2   43.00    4.30
  -7   5   2   39.90    4.00
   6  -5  -2    2.60    2.00
  -6  -5   2    0.10    2.00
   6   5  -2    1.40    1.90
  -6   5   2    1.40    2.10
  -5  -5   2    3.80    1.60
  -5  -5   2    3.70    1.10
   5  -5  -2    2.20    1.60
   5   5  -2    1.60    1.50
  -5   5   2    5.00    1.60
  -4  -5   2  218.68    8.60
   4  -5  -2  214.08    8.70
  -4  -5   2  240.08    8.30
   4  -5  -2  254.47    8.20
  -4   5   2  240.28    8.70
   4   5  -2  226.38    8.70
  -3  -5   2   49.10    2.60
   3  -5  -2   52.49    2.30
  -3  -5   2   53.39    2.40
  -3   5   2   48.10    2.50
   3   5  -2   44.30    2.40
  -3   5   2   51.09    2.80
  -2  -5   2   27.90    1.80
  -2  -5   2   24.50    1.70
   2  -5  -2   24.70    1.60
  -2   5   2   30.00    1.80
   2   5  -2   24.00    1.50
  -2   5   2   27.60    1.50
  -1  -5   2  536.75   18.20
   1  -5  -2  553.04   18.20
   1   5  -2  534.65   17.80
  -1   5   2  561.74   17.90
   1   5  -2  533.95   18.10
  -1   5   2  521.25   18.20
   0  -5   2 3378.76  107.69
   0  -5  -2 3293.97  107.89
   0  -5   2 3354.96  107.89
   0   5   2 3223.68  107.89
   0   5  -2 3185.78  107.89
  -1  -5  -2   29.30    1.70
   1  -5   2   27.70    1.60
  -1  -5  -2   27.90    1.30
   1  -5   2   27.50    1.40
   1   5   2   22.40    1.70
  -1   5  -2   27.30    1.80
  -2  -5  -2  950.10   30.60
   2  -5   2  953.10   30.60
   2  -5   2  938.81   30.80
  -2  -5  -2  928.81   30.70
   2   5   2  894.81   30.90
  -2   5  -2  867.81   30.80
  -3  -5  -2  333.27   11.70
  -3  -5  -2  329.77   11.80
   3  -5   2  346.97   11.60
   3  -5   2  352.76   12.10
  -3   5  -2  339.17   12.00
   3   5   2  339.37   12.20
  -4  -5  -2  188.18    7.30
   4  -5   2  201.48    6.70
  -4  -5  -2  193.98    7.00
   4  -5   2  197.68    7.60
  -4   5  -2  179.48    7.40
   4   5   2  182.38    7.80
   5  -5   2  256.97    9.80
  -5  -5  -2  241.58    9.40
  -5   5  -2  241.78    9.70
   5   5   2  248.88    9.90
  -6  -5  -2   59.19    4.00
   6  -5   2   65.69    4.50
   6   5   2   60.69    5.00
  -6   5  -2   54.49    4.00
   7  -5   2   93.89    6.40
  -7  -5  -2   94.79    5.60
   7   5   2   91.29    6.60
  -7   5  -2  101.09    5.70
   8  -5   2    3.10    3.40
  -8  -5  -2    0.30    2.90
  -8   5  -2    1.10    3.00
   8   5   2    1.20    3.50
   9  -5   2    5.00    4.90
  -9  -5  -2    7.60    3.90
   9   5   2    6.80    4.80
  -9   5  -2   11.70    4.50
  10   6  -2  158.48   10.50
  -9  -6   2   -0.60    3.80
   9  -6  -2   -0.10    3.70
  -9   6   2    0.10    3.80
   9   6  -2    2.60    3.70
   8  -6  -2    9.60    3.50
  -8  -6   2    6.20    2.90
  -8   6   2    5.60    3.20
   8   6  -2    5.60    3.20
   7  -6  -2  144.29    7.30
  -7  -6   2  150.78    7.30
  -7   6   2  147.19    7.30
   7   6  -2  150.68    7.70
  -6  -6   2  299.07   11.80
   6  -6  -2  300.97   11.90
   6   6  -2  327.97   12.00
  -6   6   2  298.87   11.70
  -5  -6   2  128.49    5.00
  -5  -6   2  134.39    5.60
   5  -6  -2  122.19    5.70
   5   6  -2  111.39    5.60
  -5   6   2  127.39    5.60
   4  -6  -2    0.70    1.20
  -4  -6   2    0.10    1.10
   4  -6  -2   -0.40    0.80
  -4  -6   2    1.40    0.90
  -4   6   2   -1.40    1.00
   4   6  -2   -0.40    1.10
  -3  -6   2    1.50    1.00
   3  -6  -2    1.00    0.80
  -3  -6   2    1.40    0.90
  -3   6   2    1.70    1.00
  -3   6   2    0.10    1.10
   3   6  -2    0.60    0.80
  -2  -6   2    1.90    0.90
   2  -6  -2    0.70    0.80
  -2  -6   2    1.00    0.90
  -2   6   2    1.00    0.90
   2   6  -2    1.10    0.70
  -2   6   2    0.10    0.70
   1  -6  -2 2314.87   74.49
  -1  -6   2 2288.57   74.49
  -1   6   2 2198.38   74.49
   1   6  -2 2264.57   74.09
  -1   6   2 2306.97   74.19
   1   6  -2 2203.58   74.39
   0  -6  -2 2583.04   83.29
   0  -6   2 2560.84   83.29
   0   6  -2 2499.25   83.19
   0   6  -2 2613.04   82.89
   0   6   2 2450.85   82.79
   0   6   2 2485.15   83.29
   1  -6   2  167.58    5.60
  -1  -6  -2  157.98    5.50
  -1  -6  -2  152.98    5.90
   1  -6   2  161.88    5.80
  -1   6  -2  152.48    5.80
   1   6   2  157.08    5.90
  -2  -6  -2  114.19    4.60
  -2  -6  -2  118.19    4.40
   2  -6   2  122.69    4.50
   2  -6   2  123.59    4.60
   2   6   2  110.89    4.80
  -2   6  -2  109.19    4.60
  -3  -6  -2  254.97    9.30
   3  -6   2  263.87    9.50
   3  -6   2  257.37    9.00
  -3  -6  -2  276.47    9.30
   3   6   2  251.77    9.60
  -3   6  -2  255.37    9.50
   4  -6   2  181.38    7.00
   4  -6   2  177.58    6.10
  -4  -6  -2  176.28    6.40
  -4  -6  -2  163.18    6.70
  -4   6  -2  172.58    6.90
   4   6   2  156.98    7.00
  -5  -6  -2   23.50    2.50
   5  -6   2   26.40    3.00
   5   6   2   22.80    2.80
  -5   6  -2   19.80    2.40
   6  -6   2   42.30    4.40
  -6  -6  -2   47.00    4.20
   6   6   2   51.59    4.40
  -6   6  -2   48.70    3.90
  -7  -6  -2  100.89    5.80
   7  -6   2  104.79    6.30
  -7   6  -2   98.99    5.80
   7   6   2  100.59    6.40
   8  -6   2   25.20    4.30
  -8  -6  -2   29.10    3.90
  -8   6  -2   31.10    4.00
   8   6   2   31.30    4.60
  -9  -6  -2   29.90    4.70
   9  -6   2   20.80    5.00
   9   6   2   31.80    5.60
  -9   6  -2   29.60    5.10
  10   7  -2    7.50    6.60
  -9  -7   2   -0.40    3.90
   9  -7  -2    1.10    4.10
   9   7  -2   -2.90    4.10
  -9   7   2    1.90    3.90
  -8  -7   2   69.39    5.30
   8  -7  -2   65.49    5.50
   8   7  -2   62.99    5.50
  -8   7   2   46.00    4.90
  -7  -7   2    7.40    2.60
   7  -7  -2   18.10    3.10
   7   7  -2   14.90    3.10
  -7   7   2   11.70    2.70
   6  -7  -2 1098.49   37.60
  -6  -7   2 1074.09   37.40
   6   7  -2 1121.09   37.60
  -6   7   2 1091.89   37.30
  -5  -7   2  498.85   16.70
   5  -7  -2  476.65   17.40
  -5  -7   2  491.65   17.30
   5   7  -2  476.05   17.20
  -5   7   2  484.95   17.10
  -4  -7   2   23.80    1.90
   4  -7  -2   19.10    2.20
  -4  -7   2   18.50    1.90
   4  -7  -2   18.50    1.70
  -4   7   2   20.80    2.00
   4   7  -2   21.00    2.20
   3  -7  -2   90.69    3.70
  -3  -7   2   95.89    3.90
  -3  -7   2   87.59    3.90
  -3   7   2   95.39    3.90
  -3   7   2   97.49    4.30
   3   7  -2   85.49    3.80
  -2  -7   2   68.09    3.10
   2  -7  -2   71.89    3.10
  -2  -7   2   68.69    3.20
  -2   7   2   78.39    2.90
   2   7  -2   73.19    2.90
  -2   7   2   67.59    3.20
   1  -7  -2  693.13   23.50
  -1  -7   2  690.43   23.60
   1   7  -2  685.53   23.50
   1   7  -2  717.53   23.10
  -1   7   2  693.13   23.60
  -1   7   2  721.03   23.10
   0  -7   2 2454.55   80.99
   0  -7  -2 2501.25   80.99
   0   7  -2 2430.76   80.89
   0   7   2 2420.76   80.99
   0   7  -2 2472.75   80.49
   0   7   2 2474.25   80.49
   1  -7   2  155.48    5.20
   1  -7   2  144.79    5.40
  -1  -7  -2  141.49    5.50
  -1  -7  -2  148.19    5.10
  -1   7  -2  142.09    5.50
   1   7   2  141.79    5.50
   2  -7   2 1349.66   45.10
   2  -7   2 1405.06   45.00
  -2  -7  -2 1338.47   45.10
  -2  -7  -2 1377.86   44.90
  -2   7  -2 1331.17   45.20
   2   7   2 1354.26   45.30
  -3  -7  -2   61.49    3.00
   3  -7   2   60.59    3.20
  -3  -7  -2   65.19    2.90
   3  -7   2   61.49    2.70
   3   7   2   59.19    3.30
  -3   7  -2   62.39    3.20
  -4  -7  -2   78.19    3.50
   4  -7   2   81.69    4.10
   4  -7   2   74.99    3.10
  -4  -7  -2   67.19    3.60
   4   7   2   66.49    4.00
  -4   7  -2   79.09    3.90
   5  -7   2   15.70    2.30
  -5  -7  -2   13.90    2.20
   5   7   2   17.40    2.60
  -5   7  -2   13.50    2.20
   6  -7   2  126.89    6.70
  -6  -7  -2  129.19    6.10
  -6   7  -2  129.99    6.30
   6   7   2  130.09    6.70
   7  -7   2   50.29    4.90
  -7  -7  -2   57.39    4.60
   7   7   2   58.59    5.20
  -7   7  -2   50.59    4.60
   8  -7   2   20.10    4.10
  -8  -7  -2   24.70    4.10
  -8   7  -2   21.50    4.10
   8   7   2   31.40    4.90
   9  -7   2   67.99    7.50
  -9  -7  -2   82.99    6.70
   9   7   2   87.19    8.20
  -9   7  -2   97.59    7.90
  10   8  -2   20.70    7.30
  -9  -8   2    8.50    4.30
   9  -8  -2   13.10    4.60
   9   8  -2    7.60    4.20
  -9   8   2    9.90    3.80
   8  -8  -2   30.60    4.10
  -8  -8   2   41.70    4.40
   8   8  -2   27.40    4.10
  -8   8   2   29.60    3.90
  -7  -8   2    6.10    2.50
   7  -8  -2    0.50    2.50
  -7   8   2    2.20    2.60
   7   8  -2    8.00    3.00
  -6  -8   2   40.00    3.60
   6  -8  -2   42.30    3.70
  -6   8   2   36.80    3.70
   6   8  -2   38.60    4.00
  -5  -8   2  519.25   17.20
   5  -8  -2  490.05   17.90
  -5  -8   2  488.45   17.70
  -5   8   2  508.05   17.60
   5   8  -2  489.55   17.80
  -4  -8   2    0.60    1.20
  -4  -8   2    0.30    1.20
   4  -8  -2    1.00    1.00
  -4   8   2    1.50    1.30
   4   8  -2    1.60    1.30
  -4   8   2    2.90    1.40
  -3  -8   2  102.19    4.60
  -3  -8   2  113.99    4.60
   3  -8  -2  116.59    4.50
  -3   8   2  116.89    4.50
   3   8  -2  107.09    4.50
  -3   8   2  106.69    4.80
  -2  -8   2 1329.37   42.90
  -2  -8   2 1244.38   42.80
   2  -8  -2 1261.87   42.80
  -2   8   2 1269.87   43.00
   2   8  -2 1311.57   42.60
  -2   8   2 1319.87   42.60
  -1  -8   2   86.19    3.80
   1  -8  -2   86.89    3.80
  -1   8   2   87.19    3.80
  -1   8   2   93.99    3.30
   1   8  -2   93.99    3.70
   1   8  -2   93.89    3.30
   0  -8  -2  672.13   22.40
   0  -8   2  647.84   22.30
   0   8  -2  680.33   21.90
   0   8   2  677.23   21.80
   0   8   2  653.33   22.30
   0   8  -2  636.24   22.20
  -1  -8  -2  452.35   15.00
  -1  -8  -2  448.26   15.50
   1  -8   2  438.36   15.40
   1  -8   2  470.65   15.20
  -1   8  -2  441.06   15.40
   1   8   2  447.96   15.50
  -2  -8  -2  530.65   17.50
   2  -8   2  539.75   17.70
  -2  -8  -2  515.95   17.80
   2  -8   2  512.85   17.60
   2   8   2  516.25   17.90
  -2   8  -2  497.45   17.80
  -3  -8  -2  108.39    4.30
  -3  -8  -2   92.99    4.10
   3  -8   2  102.79    4.30
   3  -8   2   96.59    4.00
  -3   8  -2  100.69    4.40
   3   8   2   95.29    4.50
   4  -8   2   37.20    3.00
  -4  -8  -2   37.30    2.50
   4  -8   2   32.30    2.00
  -4  -8  -2   36.20    2.50
  -4   8  -2   40.30    3.00
   4   8   2   33.70    2.90
   5  -8   2   62.19    4.30
  -5  -8  -2   67.29    3.80
  -5   8  -2   65.49    4.00
   5   8   2   74.29    4.70
  -6  -8  -2    7.90    2.20
   6  -8   2    5.10    2.40
  -6   8  -2    2.00    2.10
   6   8   2    5.10    2.60
   7  -8   2    3.10    2.80
  -7  -8  -2    1.00    2.50
   7   8   2    1.10    2.80
  -7   8  -2    4.20    2.60
  -8  -8  -2    6.90    3.10
   8  -8   2    5.50    3.90
  -8   8  -2   -0.80    3.40
   8   8   2    4.70    3.70
   9  -8   2    2.70    5.00
  -9  -8  -2    5.20    4.30
   9   8   2    2.20    4.70
  -9   8  -2   -6.00    3.70
   9  -9  -2   -0.60    4.40
  -9  -9   2    1.70    4.20
  -9   9   2   -0.10    3.60
   9   9  -2    2.70    4.50
  -8  -9   2   40.10    4.30
   8  -9  -2   32.80    4.30
  -8   9   2   28.30    3.90
   8   9  -2   33.80    4.30
   7  -9  -2  111.39    6.40
  -7  -9   2  115.49    6.20
  -7   9   2  101.69    5.90
   7   9  -2  115.19    6.70
   6  -9  -2  398.46   15.10
  -6  -9   2  412.56   14.80
   6   9  -2  400.56   14.90
  -6   9   2  380.56   14.60
   5  -9  -2   30.50    3.10
  -5  -9   2   32.30    2.60
  -5  -9   2   32.20    3.00
  -5   9   2   36.70    3.00
   5   9  -2   29.00    3.10
   4  -9  -2  150.58    5.80
  -4  -9   2  146.99    6.10
  -4  -9   2  148.29    5.90
   4   9  -2  146.69    6.10
  -4   9   2  153.18    6.00
  -4   9   2  143.99    6.30
   3  -9  -2 1095.29   36.30
  -3  -9   2 1107.69   36.40
  -3  -9   2 1070.19   36.40
  -3   9   2 1082.49   36.20
  -3   9   2 1059.69   36.60
   3   9  -2 1110.69   36.30
  -2  -9   2    1.50    1.20
  -2  -9   2    1.20    1.00
   2  -9  -2    2.40    1.10
  -2   9   2    2.70    0.90
   2   9  -2    1.50    0.80
  -2   9   2    2.10    1.10
   1  -9  -2  392.16   14.10
  -1  -9   2  390.46   14.10
   1   9  -2  413.66   14.00
   1   9  -2  424.56   13.60
  -1   9   2  391.66   14.00
  -1   9   2  415.86   13.60
   0  -9  -2 1095.19   37.40
   0  -9   2 1098.19   37.30
   0   9   2 1121.19   37.40
   0   9   2 1152.28   36.80
   0   9  -2 1134.39   36.90
   0   9  -2 1109.09   37.20
  -1  -9  -2    7.50    1.30
   1  -9   2    3.90    1.00
  -1  -9  -2    5.50    0.70
   1   9   2    4.10    1.10
  -1   9  -2    6.10    1.20
  -1   9  -2    5.00    0.90
   2  -9   2  978.80   32.70
   2  -9   2  987.80   32.70
  -2  -9  -2  999.90   32.50
  -2  -9  -2  980.70   32.90
  -2   9  -2  969.70   32.90
   2   9   2  961.50   33.00
  -3  -9  -2  152.48    6.00
   3  -9   2  147.49    5.70
   3  -9   2  156.78    6.00
  -3  -9  -2  148.09    5.70
  -3   9  -2  139.19    6.00
   3   9   2  145.19    6.20
  -4  -9  -2    1.60    1.30
   4  -9   2    3.20    1.10
   4  -9   2    5.20    1.60
  -4  -9  -2    5.10    1.40
   4   9   2    3.10    1.80
  -4   9  -2    2.50    1.50
  -5  -9  -2  591.64   20.50
   5  -9   2  605.44   20.90
  -5   9  -2  571.14   20.60
   5   9   2  576.84   21.00
   6  -9   2  117.99    6.40
  -6  -9  -2  130.39    6.20
  -6   9  -2  139.29    6.70
   6   9   2  128.59    6.80
  -7  -9  -2   11.60    3.10
   7  -9   2   17.40    3.60
  -7   9  -2   18.40    3.50
   7   9   2   16.00    3.90
   8  -9   2  121.69    8.20
  -8  -9  -2  120.19    7.00
  -8   9  -2  119.29    7.70
   8   9   2  115.89    7.90
  -9  -9  -2   13.20    4.30
   9  -9   2    2.30    5.10
  -9   9  -2   11.40    4.40
   9   9   2   13.80    5.40
   9 -10  -2    9.20    4.90
  -9 -10   2   10.90    4.60
  -9  10   2   14.10    4.40
   9  10  -2    9.90    4.90
   8 -10  -2   12.30    3.70
  -8 -10   2   19.00    3.90
  -8  10   2   14.30    3.30
   8  10  -2   13.30    4.00
   7 -10  -2    6.40    2.80
  -7 -10   2    4.10    2.80
  -7  10   2    3.10    2.40
   7  10  -2    4.10    3.10
  -6 -10   2    2.20    2.10
   6 -10  -2    3.10    2.30
  -6  10   2    1.20    2.20
   6  10  -2    1.80    2.50
  -5 -10   2  340.67   12.40
   5 -10  -2  345.77   13.00
  -5 -10   2  345.47   12.80
  -5  10   2  366.06   12.70
   5  10  -2  331.27   12.70
  -4 -10   2  477.15   15.90
  -4 -10   2  438.46   16.00
   4 -10  -2  462.95   15.70
  -4  10   2  433.96   16.20
   4  10  -2  456.25   16.00
  -4  10   2  448.56   15.80
   3 -10  -2   64.79    3.30
  -3 -10   2   60.49    3.20
  -3 -10   2   60.59    3.20
  -3  10   2   66.39    3.10
   3  10  -2   63.29    3.10
  -3  10   2   65.49    3.40
  -2 -10   2    2.80    1.30
   2 -10  -2    0.60    1.20
   2  10  -2    1.60    0.90
  -2  10   2    0.50    1.00
  -2  10   2    0.70    0.80
   2  10  -2    2.70    1.20
  -1 -10   2  374.06   13.40
   1 -10  -2  370.76   13.40
  -1  10   2  378.26   13.40
   1  10  -2  403.26   12.90
  -1  10   2  387.06   12.90
   1  10  -2  376.86   13.20
   0 -10   2  237.98    9.10
   0 -10  -2  246.08    9.20
   0  10   2  245.78    9.10
   0  10  -2  254.27    8.60
   0  10  -2  258.37    9.00
   0  10   2  261.37    8.50
   1 -10   2  182.58    6.80
  -1 -10  -2  173.08    6.80
  -1 -10  -2  175.58    6.20
  -1  10  -2  176.58    6.40
  -1  10  -2  186.88    6.70
   1  10   2  170.98    6.70
   2 -10   2   17.30    1.90
   2 -10   2   21.00    1.80
  -2 -10  -2   25.60    2.20
  -2 -10  -2   21.70    1.50
  -2  10  -2   22.30    2.00
   2  10   2   21.80    2.10
   3 -10   2  369.56   12.60
  -3 -10  -2  355.96   12.60
  -3 -10  -2  355.36   12.30
   3 -10   2  351.96   12.30
   3  10   2  335.87   12.70
  -3  10  -2  345.97   12.60
   4 -10   2    1.50    1.10
  -4 -10  -2    0.60    1.40
   4 -10   2    2.80    1.50
  -4 -10  -2    3.90    1.50
  -4  10  -2    1.80    1.50
   4  10   2    3.50    1.70
   5 -10   2    9.80    2.40
  -5 -10  -2   18.60    2.40
  -5  10  -2   21.40    2.60
   5  10   2   19.00    2.80
   6 -10   2    1.00    2.50
  -6 -10  -2    3.80    2.20
  -6  10  -2    2.90    2.40
   6  10   2    3.40    2.90
  -7 -10  -2   40.20    4.30
   7 -10   2   39.90    4.30
   7  10   2   41.30    4.90
  -7  10  -2   46.60    4.50
   8 -10   2    1.00    4.10
  -8 -10  -2    4.50    3.50
  -8  10  -2    4.90    3.40
   8  10   2   10.10    4.10
  -9 -10  -2    7.30    4.60
   9 -10   2    8.20    4.70
  -9  10  -2   10.00    4.40
   9  10   2    3.90    5.70
  -9 -11   2   19.30    4.40
   9 -11  -2   14.50    4.70
   9  11  -2   19.60    5.30
  -9  11   2   11.70    4.10
   8 -11  -2    5.80    3.50
  -8 -11   2    7.30    3.30
  -8  11   2    3.50    3.40
   8  11  -2    9.40    3.60
   7 -11  -2    0.40    2.60
  -7 -11   2   -2.10    2.40
  -7  11   2   -0.60    2.30
   7  11  -2    0.40    3.20
   6 -11  -2  623.34   23.00
  -6 -11   2  642.14   22.90
   6  11  -2  682.83   23.10
  -6  11   2  633.84   22.70
  -5 -11   2  772.52   26.40
  -5 -11   2  759.62   26.00
   5 -11  -2  756.22   26.50
  -5  11   2  773.42   26.20
   5  11  -2  744.33   26.30
  -4 -11   2  379.76   13.80
   4 -11  -2  379.86   13.60
  -4 -11   2  392.06   13.80
   4  11  -2  389.96   13.80
  -4  11   2  379.96   14.20
  -4  11   2  401.36   13.70
  -3 -11   2  327.87   11.60
  -3 -11   2  324.37   11.70
   3 -11  -2  317.27   11.60
  -3  11   2  308.37   11.80
  -3  11   2  342.37   11.40
   3  11  -2  320.67   11.40
   2 -11  -2  779.82   26.60
  -2 -11   2  787.72   26.70
   2  11  -2  792.22   26.50
  -2  11   2  776.42   26.70
  -2  11   2  775.62   26.20
   2  11  -2  806.02   26.30
  -1 -11   2  979.40   33.40
   1 -11  -2  966.80   33.40
  -1  11   2  997.10   32.80
   1  11  -2  959.70   33.20
   1  11  -2 1036.60   32.90
  -1  11   2 1014.10   33.40
   0 -11   2    1.00    1.20
   0 -11  -2    3.90    1.30
   0  11   2    4.10    0.70
   0  11  -2    1.90    0.70
   0  11   2    3.10    1.10
   0  11  -2    1.70    1.10
   1 -11   2   25.00    2.10
  -1 -11  -2   25.90    2.40
  -1  11  -2   32.30    1.90
   1  11   2   26.60    2.20
   1  11   2   32.10    1.60
  -1  11  -2   32.00    2.20
  -2 -11  -2 1086.49   36.30
   2 -11   2 1117.39   36.50
   2 -11   2 1068.89   36.60
  -2 -11  -2 1099.99   36.80
   2  11   2 1104.99   36.80
  -2  11  -2 1088.69   36.70
  -3 -11  -2  399.46   13.60
   3 -11   2  401.66   13.50
   3 -11   2  373.56   13.30
  -3 -11  -2  381.46   13.30
  -3  11  -2  368.96   13.60
   3  11   2  359.46   13.70
   4 -11   2   32.40    2.70
  -4 -11  -2   31.40    2.80
  -4 -11  -2   30.00    2.50
   4 -11   2   28.10    2.40
   4  11   2   28.70    3.00
  -4  11  -2   28.90    2.80
   5 -11   2    9.30    2.20
  -5 -11  -2   11.10    2.20
  -5  11  -2    8.50    2.20
   5  11   2   10.50    2.50
  -6 -11  -2  421.26   15.50
   6 -11   2  408.46   16.00
   6  11   2  423.06   16.20
  -6  11  -2  433.56   15.80
  -7 -11  -2  124.29    7.00
   7 -11   2  128.59    7.20
  -7  11  -2  130.29    7.00
   7  11   2  133.99    7.60
  -8 -11  -2   46.60    4.80
   8 -11   2   21.50    4.50
   8  11   2   42.80    5.30
  -8  11  -2   36.10    4.60
   9 -11   2   27.50    5.40
  -9 -11  -2   44.00    5.30
  -9  11  -2   35.40    6.00
   9  11   2   43.00    6.90
   9 -12  -2   10.10    4.50
  -9 -12   2   12.70    4.40
   9  12  -2   14.00    5.30
  -9  12   2    7.70    4.50
   8 -12  -2    8.40    3.60
  -8 -12   2    4.90    3.50
   8  12  -2    4.90    3.80
  -8  12   2   11.90    3.40
   7 -12  -2   97.39    6.40
  -7 -12   2  112.99    6.20
   7  12  -2  107.59    6.80
  -7  12   2  103.99    6.00
  -6 -12   2   70.49    4.70
   6 -12  -2   69.39    4.90
   6  12  -2   80.09    4.90
  -6  12   2   73.59    4.50
  -5 -12   2   92.89    4.80
  -5 -12   2  103.79    5.10
   5 -12  -2  102.69    5.30
  -5  12   2   91.89    4.70
   5  12  -2  103.09    5.20
  -4 -12   2  345.37   12.00
  -4 -12   2  327.47   12.10
   4 -12  -2  336.07   11.90
   4  12  -2  323.07   12.00
  -4  12   2  319.07   12.40
  -4  12   2  330.27   11.90
  -3 -12   2    4.00    1.30
   3 -12  -2    4.40    1.50
  -3 -12   2    4.30    1.50
  -3  12   2    6.10    1.30
  -3  12   2    3.90    1.50
   3  12  -2    5.80    1.30
  -2 -12   2    1.40    1.30
   2 -12  -2   -0.30    1.30
   2  12  -2   -0.30    0.90
  -2  12   2   -0.40    1.10
  -2  12   2   -1.00    0.90
   2  12  -2    0.80    1.10
  -1 -12   2   -0.90    1.20
   1 -12  -2   -0.10    1.20
  -1  12   2    0.10    1.10
   1  12  -2    0.80    1.10
   1  12  -2   -0.30    0.70
  -1  12   2   -0.60    0.70
   0 -12  -2   90.09    4.40
   0 -12   2   89.99    4.30
   0  12   2  108.39    3.70
   0  12  -2   92.19    4.20
   0  12  -2   98.69    3.80
   0  12   2  102.59    4.40
  -1 -12  -2  115.09    5.00
   1 -12   2  113.79    4.90
  -1  12  -2  106.79    4.40
  -1  12  -2  121.39    4.90
   1  12   2  114.19    4.20
   1  12   2  111.09    4.90
  -2 -12  -2  169.98    6.80
   2 -12   2  169.68    6.60
   2 -12   2  168.88    6.40
  -2 -12  -2  172.88    6.20
   2  12   2  166.38    6.80
  -2  12  -2  171.28    6.70
  -3 -12  -2   20.30    2.10
   3 -12   2   28.60    2.50
   3 -12   2   25.50    2.20
  -3 -12  -2   25.60    2.40
  -3  12  -2   23.50    2.40
   3  12   2   24.80    2.80
   4 -12   2  141.29    5.90
   4 -12   2  151.38    6.40
  -4 -12  -2  145.19    6.10
  -4 -12  -2  158.38    6.40
   4  12   2  165.88    6.80
  -4  12  -2  139.09    6.40
  -5 -12  -2   25.50    2.70
   5 -12   2   22.00    2.70
   5  12   2   23.40    3.30
  -5  12  -2   21.20    2.70
   6 -12   2  177.78    8.40
  -6 -12  -2  191.88    8.20
  -6  12  -2  184.08    8.30
   6  12   2  195.58    8.80
   7 -12   2   19.30    3.90
  -7 -12  -2   22.20    3.50
  -7  12  -2   22.00    3.50
   7  12   2   13.30    3.70
  -8 -12  -2   14.10    3.90
   8 -12   2   10.90    4.00
   8  12   2   17.30    4.60
  -8  12  -2   15.80    4.30
   9 -12   2   26.80    6.00
  -9 -12  -2   27.20    5.40
   9  12   2   30.10    6.10
  -9 -13   2   53.39    5.80
   9 -13  -2   53.89    6.20
  -9  13   2   52.89    5.70
   9  13  -2   59.69    6.70
  -8 -13   2   13.30    3.60
   8 -13  -2   16.00    4.30
   8  13  -2   13.60    4.20
  -8  13   2   18.20    3.90
   7 -13  -2  117.09    7.40
  -7 -13   2  131.19    6.80
   7  13  -2  142.49    7.50
  -7  13   2  117.19    6.90
   6 -13  -2   87.29    5.50
  -6 -13   2   96.09    5.30
   6  13  -2  100.69    5.70
  -6  13   2   85.19    5.00
  -5 -13   2  180.48    7.40
  -5 -13   2  171.88    7.10
   5 -13  -2  157.28    7.50
   5  13  -2  173.88    7.40
  -5  13   2  172.48    7.20
  -4 -13   2    6.20    1.70
  -4 -13   2    3.30    1.70
   4 -13  -2    3.20    1.60
  -4  13   2    2.70    1.50
   4  13  -2    2.40    1.50
  -4  13   2    5.40    2.10
  -3 -13   2   63.59    3.40
  -3 -13   2   63.79    3.50
   3 -13  -2   54.79    3.50
   3  13  -2   60.69    3.20
  -3  13   2   60.09    3.50
  -3  13   2   66.19    3.20
  -2 -13   2   37.00    2.90
   2 -13  -2   32.30    2.60
  -2  13   2   34.20    2.70
  -2  13   2   39.90    2.20
   2  13  -2   35.40    2.20
   2  13  -2   34.80    2.50
  -1 -13   2  113.99    5.10
   1 -13  -2  114.39    5.10
  -1  13   2  116.89    5.00
   1  13  -2  117.09    4.90
   1  13  -2  113.39    4.40
  -1  13   2  119.29    4.40
   0 -13   2    1.90    1.20
   0 -13  -2    2.80    1.40
   0  13  -2    1.80    1.30
   0  13   2    1.50    1.20
   0  13   2    2.70    0.80
   0  13  -2    1.70    0.80
  -1 -13  -2 1272.57   42.20
   1 -13   2 1216.18   42.00
   1  13   2 1217.08   42.00
  -1  13  -2 1229.38   41.90
   1  13   2 1315.67   41.40
  -1  13  -2 1267.67   41.60
   2 -13   2  510.75   17.00
   2 -13   2  480.25   17.20
  -2 -13  -2  495.25   17.40
  -2 -13  -2  494.55   16.80
   2  13   2  481.35   17.30
  -2  13  -2  502.85   17.20
  -3 -13  -2  474.35   16.60
  -3 -13  -2  469.65   16.10
   3 -13   2  458.05   16.30
   3 -13   2  479.65   16.40
  -3  13  -2  458.85   16.50
   3  13   2  457.45   16.60
   4 -13   2  236.58    9.20
  -4 -13  -2  239.48    9.20
   4 -13   2  234.78    8.80
  -4 -13  -2  235.78    8.90
   4  13   2  240.78    9.50
  -4  13  -2  221.38    9.20
  -5 -13  -2    7.30    2.20
   5 -13   2    5.50    2.10
  -5 -13  -2    7.20    2.20
   5  13   2    7.10    2.50
  -5  13  -2    4.00    2.40
  -6 -13  -2   61.69    4.60
   6 -13   2   50.49    4.60
  -6  13  -2   67.79    4.70
   6  13   2   53.39    5.50
   7 -13   2    0.00    3.20
  -7 -13  -2   -0.70    2.90
   7  13   2    3.00    3.30
  -7  13  -2    1.90    3.20
  -8 -13  -2    7.70    3.70
   8 -13   2    7.20    4.20
  -8  13  -2    5.10    3.70
   8  13   2    4.50    4.70
  -9 -13  -2   46.00    6.00
   9  13   2   46.30    7.70
  -9 -14   2   26.20    5.30
   9 -14  -2   18.80    5.50
   9  14  -2   16.40    7.10
  -9  14   2   15.60    5.00
   8 -14  -2   23.90    4.50
  -8 -14   2   30.70    4.70
   8  14  -2   45.10    5.30
  -8  14   2   23.70    3.90
  -7 -14   2    2.80    2.80
   7 -14  -2    1.40    2.90
   7  14  -2   -0.50    3.20
  -7  14   2   -0.20    2.50
  -6 -14   2   25.30    3.40
   6 -14  -2   26.20    3.60
   6  14  -2   29.80    3.40
  -6  14   2   24.40    3.00
  -5 -14   2    9.50    2.10
  -5 -14   2   11.60    2.50
   5  14  -2    7.40    2.20
  -5  14   2   14.60    2.40
  -4 -14   2    0.10    1.50
   4 -14  -2    0.20    1.50
  -4 -14   2    0.40    1.40
   4  14  -2    0.10    1.60
  -4  14   2    2.50    1.90
  -4  14   2   -1.90    1.40
  -3 -14   2 1082.39   36.80
   3 -14  -2 1069.09   36.70
   3  14  -2 1079.39   36.60
   3  14  -2 1122.19   36.50
  -3  14   2 1097.49   36.40
  -3  14   2 1071.29   36.90
   2 -14  -2  719.33   25.80
  -2 -14   2  755.72   25.90
  -2  14   2  735.53   25.80
   2  14  -2  777.22   25.40
  -2  14   2  781.92   25.30
   2  14  -2  744.93   25.60
  -1 -14   2    8.40    1.60
   1 -14  -2    5.80    1.60
   1  14  -2    5.30    1.10
  -1  14   2    4.90    1.50
   1  14  -2    7.10    1.40
  -1  14   2    6.50    1.00
   0 -14  -2 1701.53   58.39
   0 -14   2 1724.13   58.29
   0  14  -2 1768.82   58.09
   0  14   2 1759.62   57.59
   0  14  -2 1788.92   57.79
   0  14   2 1754.42   58.29
   1 -14   2  103.59    4.90
  -1 -14  -2  115.39    5.10
  -1  14  -2  110.19    4.40
   1  14   2   99.99    4.80
  -1  14  -2  114.39    4.90
   1  14   2  115.19    4.20
   2 -14   2   28.60    2.70
  -2 -14  -2   35.80    3.10
  -2 -14  -2   30.30    2.00
   2  14   2   29.80    2.60
  -2  14  -2   30.50    2.70
  -2  14  -2   30.30    2.30
  -3 -14  -2   21.80    2.50
   3 -14   2   19.20    2.10
   3 -14   2   20.50    2.10
  -3 -14  -2   21.30    2.10
  -3  14  -2   21.60    2.30
   3  14   2   15.10    2.20
   4 -14   2    3.40    1.80
  -4 -14  -2    5.00    2.00
  -4 -14  -2    7.30    1.80
  -4  14  -2    9.00    2.10
   4  14   2   10.10    2.50
  -5 -14  -2    0.20    2.10
   5 -14   2    2.80    2.20
  -5 -14  -2    5.10    2.10
   5  14   2    2.10    2.30
  -5  14  -2    2.10    2.20
   6 -14   2    5.00    2.60
  -6 -14  -2    4.40    2.60
   6  14   2    3.00    2.90
  -6  14  -2    2.30    2.50
  -7 -14  -2   11.60    3.10
   7 -14   2   13.50    3.40
  -7  14  -2   12.10    3.30
   7  14   2   13.30    3.80
  -8 -14  -2  147.19    7.90
   8 -14   2  136.09    8.50
   8  14   2  140.89    9.00
  -8  14  -2  128.09    8.10
  -9 -14  -2    3.10    4.50
  -9 -15   2    1.20    4.40
  -9  15   2    1.00    4.60
   8 -15  -2   71.49    7.30
  -8 -15   2   71.69    6.20
   8  15  -2   71.89    6.30
  -8  15   2   72.59    6.60
  -7 -15   2    3.70    2.90
   7 -15  -2    1.20    3.30
  -7  15   2    1.80    3.00
   7  15  -2   -2.00    3.20
  -6 -15   2   10.00    2.90
   6 -15  -2    6.40    2.70
  -6  15   2    6.70    2.60
   6  15  -2    7.80    2.90
  -5 -15   2  236.68    9.30
  -5 -15   2  236.38    9.20
   5  15  -2  222.78    9.30
  -5  15   2  221.58    9.10
  -5  15   2  227.38    9.60
   4 -15  -2  959.40   33.00
  -4 -15   2  975.30   33.20
  -4 -15   2  970.50   33.10
   4  15  -2  988.90   33.00
  -4  15   2  972.40   32.80
  -4  15   2  954.80   33.40
   3 -15  -2  198.38    8.00
  -3 -15   2  197.48    8.20
   3  15  -2  201.48    8.00
   3  15  -2  201.38    7.70
  -3  15   2  201.38    8.30
  -3  15   2  213.88    7.70
  -2 -15   2    2.30    1.60
   2 -15  -2    0.40    1.50
  -2  15   2    0.80    1.00
   2  15  -2    0.90    1.10
   2  15  -2    2.10    1.30
  -2  15   2    1.10    1.50
  -1 -15   2  219.18    8.70
   1 -15  -2  217.78    8.80
   1  15  -2  237.78    8.50
   1  15  -2  226.58    8.10
  -1  15   2  221.38    8.70
  -1  15   2  229.78    8.00
   0 -15  -2    4.90    1.70
   0 -15   2    4.20    1.50
   0  15  -2    7.80    1.60
   0  15   2    6.30    1.50
   0  15  -2    3.80    1.00
   1 -15   2   62.29    3.60
  -1 -15  -2   62.19    3.80
   1  15   2   65.19    3.50
  -1  15  -2   62.69    3.10
   1  15   2   62.89    2.80
  -1  15  -2   65.99    3.40
   2 -15   2   12.40    1.80
  -2 -15  -2   16.40    2.30
  -2  15  -2   12.80    1.70
  -2  15  -2   12.20    1.80
   2  15   2   14.30    1.50
   2  15   2    7.50    1.70
  -3 -15  -2    8.30    2.00
  -3 -15  -2    7.80    1.50
   3 -15   2   12.20    1.90
   3 -15   2    8.90    1.80
  -3  15  -2    8.50    2.10
   3  15   2    7.80    1.90
   4 -15   2  536.45   18.80
  -4 -15  -2  529.75   18.90
   4 -15   2  533.05   18.50
  -4 -15  -2  518.25   18.40
  -4  15  -2  530.35   18.80
   4  15   2  520.35   19.10
  -5 -15  -2  143.29    6.70
  -5 -15  -2  137.79    6.40
   5 -15   2  143.89    6.80
   5  15   2  129.69    7.20
  -5  15  -2  134.59    6.80
  -6 -15  -2   36.50    3.80
   6 -15   2   35.80    4.00
   6  15   2   35.60    4.20
  -6  15  -2   28.20    3.60
  -7 -15  -2   10.40    3.40
   7 -15   2   12.30    3.80
   7  15   2    7.60    3.70
  -7  15  -2   13.70    3.40
   8 -15   2   30.50    5.20
  -8 -15  -2   29.30    4.70
   8  15   2   27.60    5.20
  -8  15  -2   28.50    5.00
  -9 -16   2   12.10    5.50
  -9  16   2   21.10    5.40
   8 -16  -2   -0.40    4.20
  -8 -16   2   -0.50    3.40
  -8  16   2   -1.20    3.70
   7 -16  -2  303.77   13.30
  -7 -16   2  352.36   13.20
   7  16  -2  327.97   13.50
  -7  16   2  304.17   12.70
  -6 -16   2   -0.50    2.30
   6 -16  -2    1.70    2.50
   6  16  -2    0.80    2.70
  -6  16   2    0.70    2.30
  -5 -16   2   55.29    4.40
  -5 -16   2   60.69    4.30
   5  16  -2   56.19    4.30
  -5  16   2   60.09    4.10
  -5  16   2   61.89    4.90
   4 -16  -2  500.65   18.30
  -4 -16   2  528.95   18.50
  -4 -16   2  482.15   18.20
   4  16  -2  515.45   18.20
  -4  16   2  542.55   18.80
  -4  16   2  531.35   18.10
  -3 -16   2   -0.80    1.70
   3 -16  -2   -1.50    1.50
   3  16  -2    1.60    1.40
   3  16  -2    1.30    1.60
  -3  16   2    1.50    1.30
  -3  16   2    2.30    1.90
   2 -16  -2    4.70    1.70
  -2 -16   2    5.70    1.80
   2  16  -2    5.50    1.50
   2  16  -2    7.40    1.40
  -2  16   2    7.20    1.40
  -2  16   2    6.70    1.80
   1 -16  -2  122.09    5.80
  -1 -16   2  131.59    5.90
  -1  16   2  120.69    5.60
   1  16  -2  139.99    5.50
  -1  16   2  128.39    4.90
   1  16  -2  128.49    5.10
   0 -16  -2   52.39    3.60
   0 -16   2   53.59    3.40
   0  16   2   50.89    3.20
   0  16  -2   55.69    3.10
   0  16   2   62.99    2.70
   0  16  -2   54.19    2.80
  -1 -16  -2   52.99    3.60
   1 -16   2   51.59    3.50
  -1  16  -2   48.40    3.20
   1  16   2   51.79    2.60
   1  16   2   48.10    3.20
  -1  16  -2   48.00    2.80
  -2 -16  -2   44.90    3.70
   2 -16   2   34.30    3.10
  -2  16  -2   37.60    2.70
   2  16   2   36.90    3.20
  -2  16  -2   45.70    3.20
   2  16   2   37.00    2.40
   3 -16   2    9.80    1.90
  -3 -16  -2   14.30    2.30
  -3 -16  -2   16.10    1.80
   3 -16   2   11.90    2.10
  -3  16  -2   18.40    2.30
   3  16   2   12.80    2.20
  -4 -16  -2  302.47   12.10
   4 -16   2  326.87   11.80
   4 -16   2  325.47   12.10
  -4 -16  -2  308.47   11.60
   4  16   2  319.07   12.30
  -4  16  -2  322.47   12.10
   5 -16   2   31.60    3.60
  -5 -16  -2   40.00    4.00
  -5 -16  -2   37.80    3.60
  -5  16  -2   35.90    3.80
   5  16   2   31.00    3.70
  -6 -16  -2    1.50    2.60
   6 -16   2    2.20    2.60
  -6  16  -2   -3.00    2.90
   6  16   2    1.60    3.30
  -7 -16  -2   53.89    5.50
   7 -16   2   51.89    5.60
   7  16   2   65.99    6.30
  -7  16  -2   55.59    5.30
   8 -16   2   77.89    8.00
  -8  16  -2   69.69    7.50
   8  16   2   96.59    8.80
  -9  17   2    8.00    5.20
   8 -17  -2  182.38   10.20
  -8 -17   2  217.48   10.40
  -8  17   2  186.68   10.00
   7 -17  -2   34.00    4.50
  -7 -17   2   34.40    4.10
  -7  17   2   41.70    4.40
   6 -17  -2   44.70    4.60
  -6 -17   2   48.60    4.30
  -6  17   2   45.00    4.50
  -5 -17   2   22.00    2.70
  -5 -17   2   17.60    2.70
   5  17  -2   20.60    3.00
  -5  17   2   27.70    3.60
  -5  17   2   21.20    2.70
  -4 -17   2   23.20    2.90
   4 -17  -2   20.40    2.60
  -4  17   2   20.00    2.40
  -4  17   2   19.90    3.00
   4  17  -2   24.40    2.80
   4  17  -2   20.90    2.50
  -3 -17   2  396.86   14.90
   3 -17  -2  384.56   14.80
   3  17  -2  417.86   14.40
  -3  17   2  392.76   14.80
  -3  17   2  413.56   14.30
   3  17  -2  424.56   14.60
  -2 -17   2    8.90    2.00
   2 -17  -2    5.70    2.10
   2  17  -2    7.40    1.80
  -2  17   2    7.80    1.50
  -2  17   2    5.40    1.70
   2  17  -2    7.00    1.50
   1 -17  -2   53.69    3.70
  -1 -17   2   58.39    3.70
  -1  17   2   52.39    3.40
   1  17  -2   53.79    2.90
  -1  17   2   62.19    2.80
   1  17  -2   56.29    3.20
   0 -17   2  136.79    6.50
   0 -17  -2  152.38    6.80
   0  17  -2  159.18    6.30
   0  17  -2  156.28    5.90
   0  17   2  153.98    5.70
   0  17   2  149.88    6.30
   1 -17   2   14.20    2.10
  -1 -17  -2   18.00    2.40
  -1  17  -2   19.60    2.20
   1  17   2   17.70    1.60
   1  17   2   14.70    2.20
  -1  17  -2   16.90    1.80
   2 -17   2  960.80   33.10
  -2 -17  -2  961.80   33.30
   2  17   2  936.61   33.10
  -2  17  -2  986.70   32.80
   2  17   2 1000.20   32.40
  -2  17  -2  968.10   32.90
   3 -17   2  224.88    9.10
   3 -17   2  231.08    8.90
  -3 -17  -2  231.48    8.70
  -3 -17  -2  234.48    9.50
   3  17   2  231.68    9.40
  -3  17  -2  228.68    9.10
  -4 -17  -2   17.10    2.60
  -4 -17  -2   20.80    2.40
   4 -17   2   21.60    2.70
   4 -17   2   17.10    2.40
  -4  17  -2   18.30    2.70
   4  17   2   21.50    3.00
  -5 -17  -2    6.20    2.60
   5 -17   2    4.40    2.60
  -5 -17  -2    8.30    2.40
   5  17   2    5.70    3.00
  -5  17  -2    4.70    2.40
   6 -17   2   -0.10    3.00
  -6 -17  -2    2.10    2.80
  -6  17  -2   -0.10    2.90
   6  17   2    1.40    3.40
   7 -17   2   48.40    5.30
  -7  17  -2   50.59    5.30
   7  17   2   56.79    6.30
   8 -17   2   11.70    4.50
  -8  17  -2   17.60    5.00
   8  17   2   22.40    5.30
  -9  18   2  259.27   14.10
   8 -18  -2  153.68   10.20
  -8 -18   2  167.98    9.10
  -8  18   2  174.98    9.50
  -7 -18   2   20.90    3.80
   7 -18  -2   12.60    3.90
  -7  18   2   20.00    3.80
   6 -18  -2   -1.00    3.00
  -6 -18   2   -0.40    2.70
  -6  18   2   -0.20    2.60
  -5 -18   2  131.69    6.40
  -5 -18   2  129.19    6.60
  -5  18   2  123.89    6.20
  -5  18   2  133.59    7.10
  -4 -18   2   73.59    4.70
   4 -18  -2   86.79    5.00
  -4  18   2   82.19    5.00
   4  18  -2   85.09    5.40
   4  18  -2   78.69    4.60
  -4  18   2   89.29    4.50
  -3 -18   2  100.99    5.30
   3 -18  -2   93.79    5.20
   3  18  -2   94.29    5.00
  -3  18   2  113.59    5.40
  -3  18   2  107.79    4.80
   3  18  -2  100.59    4.90
  -2 -18   2  705.73   24.50
   2 -18  -2  682.93   24.50
   2  18  -2  708.33   23.80
   2  18  -2  705.33   24.10
  -2  18   2  705.33   23.70
  -2  18   2  680.83   24.30
   1 -18  -2  339.07   12.40
  -1 -18   2  321.77   12.20
   1  18  -2  316.37   11.40
  -1  18   2  321.87   11.20
   1  18  -2  321.07   11.70
  -1  18   2  308.27   11.90
   0 -18  -2  538.55   19.10
   0 -18   2  534.65   19.00
   0  18  -2  526.55   18.20
   0  18  -2  540.45   18.60
   0  18   2  538.25   18.00
   0  18   2  507.75   18.70
  -1 -18  -2    5.60    2.10
   1 -18   2    4.80    1.90
   1  18   2    7.50    1.30
  -1  18  -2    3.20    1.40
   1  18   2    6.10    1.70
  -1  18  -2    5.90    1.70
  -2 -18  -2   74.09    4.60
   2 -18   2   71.89    4.40
  -2  18  -2   71.19    3.90
   2  18   2   70.69    4.40
   2  18   2   68.39    3.50
  -2  18  -2   71.09    4.00
   3 -18   2   16.00    2.30
  -3 -18  -2   17.00    2.70
   3 -18   2   13.90    2.40
   3  18   2   22.10    2.10
   3  18   2   17.90    2.80
  -3  18  -2   19.50    2.70
  -4 -18  -2    5.40    2.20
   4 -18   2    7.30    2.30
  -4 -18  -2   11.20    2.70
   4 -18   2    8.20    2.20
  -4  18  -2    8.50    2.40
   4  18   2   14.20    3.00
  -5 -18  -2   -1.30    2.40
   5 -18   2    0.60    2.20
  -5  18  -2   -0.30    2.30
   5  18   2    1.40    2.70
   6 -18   2  180.28    8.80
   6  18   2  201.08    9.40
  -6  18  -2  190.88    9.20
   7 -18   2  173.28    9.60
   7  18   2  180.68    9.60
  -7  18  -2  174.18    9.50
   8 -18   2   12.10    4.60
  -8  18  -2    3.60    4.80
   8  18   2    8.40    5.10
  -8 -19   2    0.40    3.80
   8 -19  -2   -1.20    4.70
  -8  19   2    0.80    4.20
   7 -19  -2  113.59    7.70
  -7 -19   2  134.79    7.80
  -7  19   2  126.39    7.50
   6 -19  -2    4.40    3.40
  -6 -19   2   10.30    3.20
  -6  19   2    4.40    2.80
  -5 -19   2   34.40    3.70
  -5 -19   2   32.70    3.40
  -5  19   2   29.30    3.20
  -5  19   2   34.70    3.90
   4 -19  -2  117.99    5.90
  -4 -19   2  108.09    6.00
   4  19  -2  101.69    5.60
  -4  19   2  101.59    5.80
  -4  19   2  103.39    5.20
   3 -19  -2  416.36   14.90
  -3 -19   2  394.76   15.00
  -3  19   2  406.06   14.30
   3  19  -2  386.46   14.50
  -3  19   2  402.36   15.00
  -2 -19   2  131.49    6.40
   2 -19  -2  139.89    6.60
   2  19  -2  128.89    5.90
  -2  19   2  122.29    6.20
  -2  19   2  137.59    5.50
  -1 -19   2   58.99    4.10
   1 -19  -2   67.89    4.70
   1  19  -2   68.39    3.90
  -1  19   2   61.39    4.10
  -1  19   2   62.49    3.20
   1  19  -2   59.89    3.30
   0 -19  -2   29.40    3.30
   0 -19   2   23.80    2.80
   0  19  -2   32.30    3.00
   0  19  -2   30.60    2.50
   0  19   2   27.50    3.10
  -1 -19  -2  152.98    7.50
   1 -19   2  169.58    7.20
  -1  19  -2  161.38    6.40
  -1  19  -2  166.78    6.90
   1  19   2  157.68    7.00
   2 -19   2    3.40    2.20
  -2 -19  -2   -0.40    2.10
  -2  19  -2    2.40    1.60
  -2  19  -2    1.80    2.10
   2  19   2    1.30    2.10
   3 -19   2    3.90    1.90
  -3 -19  -2    2.80    2.30
   3 -19   2    0.40    1.90
   3  19   2   -0.20    2.10
  -3  19  -2    0.10    1.90
   4 -19   2   39.00    3.80
  -4 -19  -2   33.90    3.70
   4 -19   2   32.00    3.70
  -4  19  -2   29.60    3.50
   4  19   2   34.70    4.00
  -5 -19  -2  391.86   14.90
   5 -19   2  397.66   14.90
  -5  19  -2  381.26   14.90
   5  19   2  380.36   15.30
   6 -19   2    2.30    2.90
   6  19   2    1.90    3.30
  -6  19  -2    5.50    3.00
   7 -19   2   32.90    5.00
  -7  19  -2   31.20    4.60
   7  19   2   33.70    5.10
   8 -19   2    3.00    5.00
  -8  19  -2    9.80    4.50
   8  19   2    6.20    5.80
   8 -20  -2    2.40    5.00
  -8 -20   2    1.40    4.50
   7 -20  -2    9.00    4.10
  -7 -20   2    3.40    3.90
  -7  20   2    6.80    3.20
   6 -20  -2  717.13   26.10
  -6 -20   2  719.43   25.80
  -6  20   2  718.93   25.40
  -5 -20   2  238.58   10.10
  -5  20   2  256.17    9.80
   5  20  -2  225.68    9.90
  -5  20   2  241.98   10.50
   4 -20  -2   -0.30    2.40
  -4 -20   2    1.90    2.50
  -4  20   2   -1.80    2.00
   4  20  -2    0.40    2.00
  -4  20   2    3.20    2.40
  -3 -20   2 1042.50   36.70
   3 -20  -2 1098.39   36.80
  -3  20   2 1087.79   36.30
  -3  20   2 1070.99   36.70
   3  20  -2 1037.40   36.30
   2 -20  -2  239.28    9.90
  -2 -20   2  240.98    9.70
  -2  20   2  229.98    9.40
   2  20  -2  224.38    9.10
  -1 -20   2  421.56   15.80
   1 -20  -2  419.96   15.80
   1  20  -2  435.06   15.30
  -1  20   2  421.76   15.50
   0 -20  -2   43.50    3.90
   0 -20   2   40.70    3.70
   0  20  -2   39.00    3.30
   0  20   2   32.30    3.40
  -1 -20  -2  131.99    6.60
   1 -20   2  135.19    6.60
   1  20   2  134.79    6.10
  -1  20  -2  129.99    5.70
  -1  20  -2  134.19    6.10
   2 -20   2   49.99    4.30
  -2 -20  -2   61.19    4.50
  -2  20  -2   51.09    3.60
   2  20   2   54.89    4.20
  -2  20  -2   44.50    3.60
  -3 -20  -2  341.17   13.90
   3 -20   2  367.56   13.80
   3 -20   2  389.96   13.50
  -3  20  -2  355.86   13.60
   3  20   2  357.46   13.90
   4 -20   2   17.00    2.90
  -4 -20  -2   16.00    3.20
  -4  20  -2   17.20    2.90
   4  20   2   24.50    3.60
  -5 -20  -2  262.97   10.90
   5 -20   2  254.07   10.70
   5  20   2  248.48   10.90
  -5  20  -2  240.08   10.50
   6 -20   2    1.40    2.90
   6  20   2    3.70    3.90
  -6  20  -2    0.90    3.00
   7 -20   2   48.80    5.80
  -7  20  -2   59.69    6.20
   7  20   2   72.69    6.90
   8 -20   2   48.30    6.50
   8  20   2   49.99    7.40
  -8 -21   2    0.50    5.00
   8 -21  -2   -3.40    4.50
   7 -21  -2   46.40    5.60
  -7 -21   2   42.20    5.20
   6 -21  -2   86.19    6.80
  -5 -21   2   64.89    5.50
   5  21  -2   68.99    5.30
  -5  21   2   65.79    5.40
  -4 -21   2   26.10    3.50
   4 -21  -2   24.20    3.40
   4  21  -2   15.10    2.90
  -4  21   2   22.10    3.50
  -3 -21   2   66.49    4.70
   3 -21  -2   62.49    4.70
   3  21  -2   62.19    4.50
  -3  21   2   72.29    4.70
   2 -21  -2  385.66   14.50
  -2 -21   2  382.76   14.40
   2  21  -2  368.66   13.80
  -2  21   2  374.46   14.20
  -1 -21   2  125.69    6.30
   1 -21  -2  123.99    6.50
  -1  21   2  119.39    6.20
   1  21  -2  133.49    6.00
   0 -21   2   44.20    3.90
   0 -21  -2   40.10    4.10
   0  21   2   40.30    3.50
   0  21  -2   42.50    3.60
  -1 -21  -2   -0.70    2.30
   1 -21   2   -0.80    2.00
  -1  21  -2   -0.10    2.10
   1  21   2   -1.10    2.00
   2 -21   2   77.59    4.80
  -2 -21  -2   72.29    5.10
   2  21   2   80.69    5.00
  -2  21  -2   68.39    4.70
   3 -21   2  134.99    6.40
  -3 -21  -2  140.59    7.30
   3 -21   2  145.09    6.80
   3  21   2  137.99    6.90
  -3  21  -2  118.39    6.30
   4 -21   2  235.78    9.70
  -4 -21  -2  243.58   10.40
  -4  21  -2  223.08   10.00
   4  21   2  234.58   10.10
  -5 -21  -2   -1.20    2.60
   5 -21   2   -1.80    2.80
   5  21   2    0.30    3.40
  -5  21  -2    2.50    3.10
   6 -21   2  310.57   13.50
   6  21   2  344.17   14.20
  -6  21  -2  321.17   13.50
   7 -21   2   68.79    7.40
   7  21   2   85.99    7.50
  -7  21  -2   77.59    7.60
   8 -21   2   16.30    5.70
   8  21   2   27.80    6.90
  -8 -22   2  101.49    8.30
  -7 -22   2   14.50    4.50
   7 -22  -2    7.90    4.10
   6 -22  -2   34.20    4.60
   6  22  -2   46.00    4.60
  -5 -22   2   59.09    5.60
  -5  22   2   66.99    6.00
   5  22  -2   67.29    5.40
   4 -22  -2    0.70    2.70
  -4 -22   2   -1.20    2.70
   4  22  -2    0.90    2.50
  -4  22   2   -1.20    2.70
   3 -22  -2   13.10    3.10
  -3 -22   2   10.00    3.00
  -3  22   2    8.20    2.60
   3  22  -2   11.60    2.70
  -2 -22   2    0.50    2.30
   2 -22  -2    0.00    2.30
   2  22  -2    0.60    2.10
  -2  22   2    2.80    2.10
  -1 -22   2 1036.60   36.10
   1 -22  -2 1046.70   36.20
  -1  22   2 1047.60   35.80
   1  22  -2 1037.50   35.50
   0 -22  -2  541.95   19.90
   0 -22   2  512.55   19.50
   0  22   2  559.14   19.40
   0  22  -2  533.75   19.10
  -1 -22  -2   30.00    3.60
   1 -22   2   26.70    3.40
  -1  22  -2   24.40    2.80
   1  22   2   34.00    3.40
   2 -22   2    4.50    2.40
  -2 -22  -2   10.30    3.20
  -2  22  -2    7.90    2.30
   2  22   2    5.80    2.60
  -3 -22  -2    9.80    3.30
   3 -22   2   16.10    2.80
  -3  22  -2   16.30    3.10
   3  22   2   11.90    2.80
  -4 -22  -2   49.90    5.00
   4 -22   2   47.40    4.80
  -4  22  -2   52.89    5.10
   4  22   2   62.99    5.60
  -5 -22  -2    1.30    3.30
   5 -22   2   -0.70    2.80
  -5  22  -2    1.40    2.90
   5  22   2    2.80    3.40
   6 -22   2   68.79    6.50
   6  22   2   86.89    7.40
  -6  22  -2   69.49    6.10
   7 -22   2   72.59    6.70
  -7  22  -2   67.19    7.00
   7  22   2   72.29    7.40
  -8 -23   2    6.10    4.90
   7 -23  -2    3.10    4.30
   7  23  -2    5.00    4.50
   6 -23  -2  117.09    8.10
   6  23  -2  123.39    7.10
  -5 -23   2    6.00    3.40
  -5  23   2    3.60    3.40
   5  23  -2    4.60    2.80
   4 -23  -2  395.36   14.80
  -4 -23   2  362.66   14.90
  -4  23   2  385.26   15.10
   4  23  -2  385.66   14.60
   3 -23  -2  136.49    7.00
  -3 -23   2  123.89    6.80
  -3  23   2  132.69    7.00
   3  23  -2  119.29    6.40
  -2 -23   2   -1.10    2.60
   2 -23  -2    2.10    2.60
  -2  23   2    1.10    2.20
   2  23  -2    1.00    2.20
  -1 -23   2   30.20    3.50
   1 -23  -2   28.10    3.50
  -1  23   2   35.60    4.10
   1  23  -2   21.80    2.90
   0 -23   2  322.67   12.60
   0 -23  -2  306.87   12.50
   0  23  -2  295.07   11.80
   0  23   2  315.57   12.00
  -1 -23  -2  132.19    7.20
   1 -23   2  136.49    7.00
   1  23   2  140.59    6.60
  -1  23  -2  138.39    6.70
   2 -23   2  101.19    6.10
  -2 -23  -2   86.59    5.90
   2  23   2   93.29    5.70
  -2  23  -2   95.99    5.60
   3 -23   2  109.29    6.20
  -3 -23  -2  121.29    7.10
  -3  23  -2  108.79    6.30
   3  23   2  108.49    6.20
  -4 -23  -2   44.00    5.00
   4  23   2   53.69    5.40
  -4  23  -2   38.90    4.30
  -5 -23  -2    8.70    3.60
   5  23   2   10.40    3.50
  -5  23  -2    8.20    3.20
  -6  23  -2   31.70    4.50
   6  23   2   26.90    4.70
   7  23   2   49.80    6.30
  -7  23  -2   44.70    5.50
   7 -24  -2    2.70    4.90
   7  24  -2    7.20    4.70
   6 -24  -2   12.60    4.40
   6  24  -2   15.00    3.70
  -5 -24   2   28.20    4.40
  -5  24   2   36.60    4.70
   5  24  -2   32.80    4.10
   4 -24  -2  206.28    9.40
  -4  24   2  188.38    9.10
   4  24  -2  187.58    8.50
  -3 -24   2    1.40    2.90
   3 -24  -2    3.40    3.10
   3  24  -2    0.10    2.60
  -3  24   2    1.80    2.60
  -2 -24   2   65.89    5.30
   2 -24  -2   70.09    5.40
   2  24  -2   67.49    4.80
  -2  24   2   76.39    5.00
   1 -24  -2   32.70    3.90
  -1 -24   2   31.10    3.70
  -1  24   2   34.50    3.70
   1  24  -2   35.40    3.40
   0 -24   2   34.60    3.80
   0 -24  -2   35.20    4.20
   0  24  -2   36.00    3.60
   0  24   2   30.50    3.50
   1 -24   2   48.40    4.70
  -1 -24  -2   48.80    4.90
  -1  24  -2   49.80    4.40
   1  24   2   47.30    4.10
  -2 -24  -2    2.40    2.90
   2 -24   2    5.50    2.70
   2  24   2    6.80    2.60
  -2  24  -2    4.20    2.70
  -3 -24  -2   80.69    6.50
   3 -24   2   96.69    6.30
   3  24   2   91.49    6.10
  -3  24  -2   91.99    5.60
  -4 -24  -2   46.40    5.00
   4  24   2   66.09    5.30
  -4  24  -2   55.59    5.50
  -5 -24  -2   12.30    4.00
  -5  24  -2   14.60    3.60
   5  24   2   12.80    4.10
  -6  24  -2   11.00    4.00
   6  24   2   10.10    4.20
  -7  24  -2   97.89    8.80
   7 -25  -2    2.60    5.10
   6 -25  -2   -0.50    4.20
   6  25  -2    2.10    3.90
  -5 -25   2   25.10    4.20
  -5  25   2   31.10    4.80
   5  25  -2   39.40    4.50
   4 -25  -2   32.50    4.30
  -4 -25   2   29.30    4.40
   4  25  -2   22.80    3.40
  -4  25   2   30.90    4.30
  -3 -25   2  414.16   16.90
   3 -25  -2  456.95   17.00
   3  25  -2  445.06   16.40
  -3  25   2  439.76   16.70
  -2 -25   2  284.97   12.10
   2 -25  -2  288.07   12.10
   2  25  -2  290.67   11.40
  -2  25   2  280.67   11.60
   1 -25  -2  325.57   13.20
  -1 -25   2  334.77   13.20
  -1  25   2  324.57   12.90
   1  25  -2  306.87   12.40
   0 -25   2   16.20    3.30
   0 -25  -2   21.90    3.60
   0  25  -2   26.70    3.20
   0  25   2   18.40    2.90
  -1 -25  -2  213.58    9.80
   1 -25   2  212.38    9.80
   1  25   2  211.28    9.30
  -1  25  -2  201.98    9.00
   2 -25   2  147.09    7.40
  -2 -25  -2  118.49    7.30
  -2  25  -2  138.89    7.00
   2  25   2  128.79    7.10
   3 -25   2  157.38    8.00
  -3 -25  -2  164.08    8.80
   3  25   2  159.98    8.20
  -3  25  -2  159.08    8.00
  -4 -25  -2   25.80    4.30
   4  25   2   19.30    3.60
  -4  25  -2   20.90    3.60
  -5 -25  -2  258.07   11.30
   5  25   2  236.88   11.50
  -5  25  -2  229.08   10.70
  -6  25  -2    3.30    4.30
  -7  25  -2    9.00    6.00
   7 -26  -2   16.40    6.40
   6 -26  -2    6.30    4.60
  -5 -26   2   33.50    4.90
  -5  26   2   45.10    5.40
   4 -26  -2   33.30    4.50
  -4 -26   2   20.00    4.00
  -4  26   2   25.00    4.20
   4  26  -2   22.80    3.90
  -3 -26   2   10.30    3.30
   3 -26  -2   15.70    3.50
  -3  26   2   12.40    3.60
   3  26  -2   11.40    3.20
  -2 -26   2  108.29    6.90
   2 -26  -2  121.99    7.50
   2  26  -2  108.49    6.30
  -2  26   2  112.79    6.90
   1 -26  -2    1.90    2.90
  -1 -26   2    2.50    2.80
   1  26  -2    3.40    2.80
  -1  26   2    1.60    2.70
   0 -26  -2  114.19    6.90
   0 -26   2  117.09    6.80
   0  26   2  110.19    6.60
   0  26  -2  113.39    6.20
   1 -26   2  127.89    7.50
  -1 -26  -2  112.39    7.10
  -1  26  -2  122.99    6.70
   1  26   2  123.99    6.90
   2 -26   2    5.30    3.30
  -2 -26  -2    7.10    3.30
   2  26   2    7.10    3.10
  -2  26  -2    3.50    2.80
  -3 -26  -2    3.10    3.60
   3 -26   2    4.00    3.40
  -3  26  -2    3.60    3.20
   3  26   2    5.30    3.20
  -4 -26  -2    4.90    3.50
   4  26   2    5.20    3.70
  -4  26  -2    3.60    3.50
  -5 -26  -2   -1.80    4.00
  -5  26  -2    1.30    3.80
  -6  26  -2   41.10    5.20
   6 -27  -2    5.40    4.90
  -5 -27   2   16.10    4.60
  -5  27   2   13.20    4.10
   4 -27  -2   55.49    6.20
  -4 -27   2   58.69    6.00
  -4  27   2   49.20    5.40
   3 -27  -2    9.20    3.90
  -3 -27   2    3.70    3.60
  -3  27   2    2.00    3.40
   2 -27  -2   16.10    3.60
  -2 -27   2   15.10    4.00
  -2  27   2   22.80    3.90
   2  27  -2   16.60    4.80
   1 -27  -2  210.78   10.00
  -1 -27   2  214.48    9.90
   1  27  -2  197.38    9.10
  -1  27   2  207.48    9.30
   0 -27  -2    3.20    3.00
   0 -27   2    3.70    3.00
   0  27   2    3.00    2.60
   0  27  -2    1.70    2.50
  -1 -27  -2   51.19    5.60
   1 -27   2   62.09    6.00
  -1  27  -2   51.99    5.10
   1  27   2   53.59    5.30
  -2 -27  -2  188.58   10.20
   2 -27   2  222.98   10.20
   2  27   2  202.98    9.50
  -2  27  -2  195.98    9.20
   3 -27   2    8.30    3.70
  -3 -27  -2   10.90    4.00
  -3  27  -2    4.90    3.30
  -4 -27  -2   -2.10    3.60
  -4  27  -2   -0.30    3.10
  -5 -27  -2   22.90    4.70
  -5  27  -2   24.40    4.80
  -6  27  -2   -1.00    4.10
   6 -28  -2   15.60    4.80
  -5 -28   2    4.40    4.40
  -5  28   2   10.90    4.70
  -4 -28   2   76.89    7.60
   4 -28  -2   92.69    7.30
  -4  28   2   94.69    6.80
   3 -28  -2   11.80    4.20
  -3 -28   2    4.10    3.80
  -3  28   2    0.40    3.50
  -2 -28   2   64.09    6.70
   2 -28  -2   66.39    6.00
  -2  28   2   62.69    5.90
  -1 -28   2   73.19    6.00
   1 -28  -2   72.49    6.10
  -1  28   2   71.19    5.50
   0 -28  -2    1.50    3.20
   0 -28   2    3.40    3.10
   0  28   2    4.70    3.20
  -1 -28  -2    4.30    3.40
   1 -28   2    4.70    3.60
   1  28   2    5.60    5.20
  -2 -28  -2   -1.10    3.40
   2 -28   2    2.80    3.50
  -3 -28  -2   13.60    4.50
   3 -28   2   10.90    4.00
  -4 -28  -2   24.30    4.80
  -5 -28  -2    0.30    4.60
   6 -29  -2    4.70    5.30
  -5 -29   2    5.20    4.30
  -5  29   2    5.60    4.30
  -4 -29   2   65.49    7.30
  -4  29   2   56.19    6.00
   3 -29  -2   12.90    3.90
  -3 -29   2   18.90    4.30
  -3  29   2   18.70    4.30
  -2 -29   2  110.19    8.20
   2 -29  -2  107.49    8.10
  -2  29   2  120.39    7.60
   1 -29  -2    2.70    3.90
  -1 -29   2    5.10    3.50
   0 -29   2   55.39    5.90
   0 -29  -2   58.99    6.10
   1 -29   2    7.40    4.00
  -1 -29  -2    3.50    3.60
   2 -29   2   13.20    4.20
  -2 -29  -2   12.30    4.10
  -3 -29  -2   15.30    4.70
   3 -29   2    9.90    3.80
  -4 -29  -2   45.90    6.10
  -5 -29  -2   33.30    5.70
  -5 -30   2    8.30    5.30
  -4 -30   2   29.60    5.20
   3 -30  -2   64.99    6.80
  -3 -30   2   60.89    6.70
  -2 -30   2   48.30    5.80
   2 -30  -2   45.20    5.60
  -1 -30   2   17.90    4.20
   1 -30  -2   10.50    4.00
   0 -30   2  221.08   11.20
   0 -30  -2  251.27   12.00
  -1 -30  -2    8.50    4.50
   1 -30   2    8.80    4.30
  -2 -30  -2   22.20    4.60
   2 -30   2   21.10    4.80
  -3 -30  -2   -0.60    4.70
   3 -30   2   -2.30    3.60
  -4 -30  -2   11.00    5.40
  -5 -30  -2   42.00    6.40
  -5 -31   2   -2.80    5.30
   3 -31  -2    4.00    4.30
  -3 -31   2   -0.30    4.10
  -2 -31   2   11.30    4.30
   2 -31  -2    7.30    4.30
   1 -31  -2   26.30    4.80
  -1 -31   2   29.50    5.30
   0 -31  -2   51.79    5.80
   0 -31   2   58.09    6.20
   1 -31   2   18.10    4.40
  -1 -31  -2   15.40    4.60
  -2 -31  -2    3.50    4.20
   2 -31   2    1.60    4.40
  -3 -31  -2   18.50    5.50
   3 -31   2   17.90    4.70
  -4 -31  -2   28.70    6.20
  -4 -32   2   88.29    9.70
   3 -32  -2    7.80    5.30
  -3 -32   2   11.90    5.40
  -2 -32   2   14.10    4.90
   2 -32  -2   26.10    5.20
  -1 -32   2   13.40    5.00
   1 -32  -2   11.50    4.60
   0 -32   2    3.90    4.70
   0 -32  -2    5.70    4.40
   1 -32   2    0.30    4.00
  -1 -32  -2    1.00    4.40
  -2 -32  -2    5.50    4.60
   2 -32   2    7.10    4.40
  -3 -32  -2    2.00    5.30
   3 -32   2   -1.40    4.30
   3 -33  -2   39.40    6.80
   2 -33  -2   25.60    5.60
  -2 -33   2   29.50    5.60
   1 -33  -2   96.99    9.60
  -1 -33   2  102.89    8.50
   0 -33   2   19.90    5.00
   0 -33  -2    8.80    4.90
  -1 -33  -2   84.69    8.50
   1 -33   2   77.89    7.90
   2 -33   2  166.68   10.50
  -2 -33  -2  187.38   11.00
   3 -33   2    6.10    5.50
   3 -34  -2    3.40    6.80
   2 -34  -2   90.39   10.00
   1 -34  -2  227.28   12.70
   0 -34   2    9.60    5.20
   0 -34  -2   11.30    6.00
   1 -34   2  143.29   10.80
   2 -34   2    8.50    6.00
  10   0  -3    3.60    4.70
  -9   0   3   -1.80    3.30
   9   0  -3   -1.60    3.40
  -8   0   3    0.60    3.00
   8   0  -3    1.40    2.80
   7   0  -3   -0.50    2.20
  -7   0   3   -1.90    2.10
   6   0  -3    3.00    2.10
  -6   0   3   -0.90    1.80
   5   0  -3   -0.20    1.40
  -5   0   3   -1.30    0.90
  -5   0   3   -1.30    1.30
  -4   0   3   -0.40    1.10
  -4   0   3   -0.10    0.80
   4   0  -3    0.90    1.10
   3   0  -3    0.30    0.90
  -3   0   3    1.00    0.90
  -3   0   3    0.00    0.80
  -2   0   3    0.20    0.80
  -2   0   3    0.20    0.80
  -2   0   3    1.40    0.80
  -1   0   3    1.10    0.70
  -1   0   3   -0.80    0.60
  -1   0   3    0.60    0.60
   0   0   3   -0.20    0.60
   0   0   3    0.20    0.70
   0   0  -3    0.40    0.60
   1   0   3   -0.30    0.80
   1   0   3    0.20    0.70
  -1   0  -3    1.00    0.70
  -2   0  -3   -0.10    0.80
   2   0   3    2.40    0.90
   2   0   3    0.30    0.70
  -3   0  -3    0.50    0.80
   3   0   3   -0.30    1.10
  -3   0  -3    1.00    1.10
   4   0   3    2.10    1.40
  -4   0  -3   -0.30    0.80
  -4   0  -3   -0.60    1.20
  -5   0  -3   -0.20    1.70
   5   0   3   -0.10    1.80
   6   0   3    0.50    2.50
  -6   0  -3    0.20    2.00
  -7   0  -3    0.00    2.30
   7   0   3   -0.20    2.80
  -8   0  -3   -2.00    2.80
   8   0   3    0.20    3.80
   9   0   3    0.80    5.10
  -9   0  -3   -0.30    3.90
  10  -1  -3    3.80    4.80
  10   1  -3    0.80    5.30
   9  -1  -3   15.50    4.10
  -9  -1   3   28.00    4.60
  -9   1   3   17.70    3.90
   9   1  -3   21.10    4.20
   8  -1  -3   76.99    5.90
  -8  -1   3   85.49    5.70
   8   1  -3   96.09    6.50
  -8   1   3   81.29    5.60
   7  -1  -3  105.99    5.90
  -7  -1   3  104.89    5.60
   7   1  -3  102.89    5.90
  -7   1   3   96.79    5.60
  -6  -1   3  609.74   21.80
   6  -1  -3  627.74   22.00
   6   1  -3  616.14   22.00
  -6   1   3  633.64   21.90
  -5  -1   3   70.39    3.00
  -5  -1   3   78.39    4.00
   5  -1  -3   59.49    3.70
  -5   1   3   69.59    3.70
   5   1  -3   69.79    4.00
  -4  -1   3  440.96   15.60
   4  -1  -3  434.96   15.60
  -4  -1   3  461.75   15.20
   4   1  -3  434.86   15.60
  -4   1   3  454.55   15.60
  -4   1   3  455.15   15.20
  -3  -1   3   12.40    1.40
  -3  -1   3   14.90    1.60
  -3   1   3   14.50    1.50
  -3   1   3   18.20    1.50
  -3   1   3   18.40    1.70
   3   1  -3   13.70    1.60
  -2  -1   3 1011.10   35.00
  -2  -1   3 1079.29   35.00
  -2  -1   3 1053.29   35.00
  -2   1   3 1074.49   35.00
  -2   1   3 1044.90   34.90
  -2   1   3 1065.49   35.10
  -1  -1   3   59.09    2.60
  -1  -1   3   61.49    2.40
  -1   1   3   61.39    2.50
  -1   1   3   57.99    2.30
  -1   1   3   52.89    2.50
   1   1  -3   60.09    2.40
   0  -1   3  398.16   13.20
   0  -1   3  385.36   13.30
   0  -1  -3  402.76   13.10
   0   1   3  391.16   13.30
   0   1  -3  394.66   13.20
   0   1   3  387.56   13.40
   1  -1   3  748.33   24.50
  -1  -1  -3  748.93   24.40
   1  -1   3  717.43   24.50
   1   1   3  741.43   24.50
  -1   1  -3  726.53   24.50
   1   1   3  722.33   24.50
   2  -1   3   63.19    3.00
   2  -1   3   64.39    2.60
  -2  -1  -3   51.19    2.60
   2   1   3   62.29    2.90
   2   1   3   62.29    2.60
  -2   1  -3   57.99    2.70
   3  -1   3  818.62   26.80
   3  -1   3  802.62   27.30
  -3  -1  -3  783.12   27.10
  -3  -1  -3  827.72   26.80
   3   1   3  785.12   27.30
  -3   1  -3  808.72   27.20
  -4  -1  -3  398.56   13.40
  -4  -1  -3  389.86   14.00
   4  -1   3  395.66   14.30
  -4   1  -3  409.66   13.30
  -4   1  -3  384.86   14.00
   4   1   3  384.86   14.30
  -5  -1  -3   49.10    3.30
   5  -1   3   41.70    3.50
  -5   1  -3   44.20    3.30
   5   1   3   42.60    3.50
  -6  -1  -3  126.09    6.10
   6  -1   3  127.29    6.60
  -6   1  -3  120.29    6.30
   6   1   3  135.79    6.70
   7  -1   3  326.27   13.00
  -7  -1  -3  304.67   12.30
  -7   1  -3  308.87   12.50
   7   1   3  305.07   12.90
   8  -1   3   18.30    4.20
  -8  -1  -3   16.50    3.50
   8   1   3   13.20    4.10
  -8   1  -3   14.50    3.40
  -9  -1  -3   31.90    5.20
   9  -1   3   32.40    5.70
   9   1   3   32.00    5.80
  -9   1  -3   35.60    5.10
  10  -2  -3   17.20    6.40
  10   2  -3   16.50    5.80
   9  -2  -3   25.30    4.70
  -9  -2   3   19.80    4.10
   9   2  -3   20.00    4.60
  -9   2   3   19.90    4.00
  -8  -2   3  105.29    6.20
   8  -2  -3  100.79    6.40
  -8   2   3   99.49    6.20
   8   2  -3   98.29    6.40
   7  -2  -3   22.80    3.40
  -7  -2   3   18.90    2.90
  -7   2   3   12.50    2.70
   7   2  -3   18.30    3.00
  -6  -2   3   14.10    2.50
   6  -2  -3   13.40    2.40
   6   2  -3   12.60    2.30
  -6   2   3   10.50    2.20
  -5  -2   3  529.55   18.90
  -5  -2   3  562.84   18.30
   5  -2  -3  523.35   19.00
  -5   2   3  557.14   19.00
   5   2  -3  536.75   19.00
   4  -2  -3  126.09    5.50
  -4  -2   3  136.29    5.00
  -4  -2   3  138.59    5.50
   4   2  -3  130.59    5.50
  -4   2   3  134.39    5.40
  -3  -2   3  949.01   31.20
  -3  -2   3  918.21   31.30
   3   2  -3  948.41   31.30
  -3   2   3  938.51   31.10
  -3   2   3  921.21   31.40
  -3   2   3  942.21   31.30
  -2  -2   3    6.90    1.00
  -2  -2   3    6.20    0.90
  -2   2   3    5.80    0.90
  -2   2   3    6.40    1.00
  -2   2   3    4.50    1.00
  -1  -2   3 2593.14   84.69
  -1  -2   3 2567.14   84.99
   1   2  -3 2664.23   84.89
  -1   2   3 2569.04   84.69
  -1   2   3 2523.65   84.89
  -1   2   3 2593.14   84.99
   0  -2  -3    4.50    0.60
   0  -2   3    3.80    0.80
   0  -2   3    5.30    0.70
   0   2   3    5.20    0.90
   0   2  -3    6.90    0.90
   0   2   3    4.20    0.90
   1  -2   3   33.30    1.80
  -1  -2  -3   39.10    1.80
   1  -2   3   38.80    1.90
   1   2   3   38.50    2.00
  -2  -2  -3   48.10    2.30
  -2  -2  -3   49.00    2.30
   2  -2   3   50.89    2.40
   2  -2   3   44.00    2.10
   2   2   3   46.00    2.50
  -2   2  -3   45.80    2.40
  -3  -2  -3    4.80    1.20
   3  -2   3    5.00    0.90
  -3  -2  -3    5.20    1.00
   3  -2   3    4.30    1.30
   3   2   3    5.30    1.40
  -3   2  -3    5.00    1.30
   4  -2   3    1.20    1.40
  -4  -2  -3    0.00    1.10
  -4  -2  -3    1.50    0.90
  -4   2  -3    2.00    0.90
   4   2   3    0.90    1.40
  -4   2  -3    1.20    1.30
   5  -2   3   52.19    3.90
  -5  -2  -3   61.69    3.80
  -5   2  -3   54.99    3.60
   5   2   3   61.49    4.30
   6  -2   3  154.68    7.50
  -6  -2  -3  155.38    7.00
   6   2   3  157.48    7.60
  -6   2  -3  163.48    7.10
   7  -2   3   -1.80    2.80
  -7  -2  -3   -1.30    2.30
   7   2   3   -0.80    2.80
  -7   2  -3    0.00    2.70
   8  -2   3   61.39    6.30
  -8  -2  -3   76.39    5.70
   8   2   3   71.89    6.60
  -8   2  -3   82.69    6.30
  -9  -2  -3    6.60    3.90
   9  -2   3    8.00    5.20
   9   2   3   10.00    5.40
  -9   2  -3   11.60    4.30
  10   3  -3    4.80    5.40
  -9  -3   3  167.88    8.90
   9  -3  -3  169.48    9.60
  -9   3   3  160.08    8.70
   9   3  -3  176.98    9.80
  -8  -3   3   35.80    4.10
   8  -3  -3   42.50    4.90
  -8   3   3   47.80    4.60
   8   3  -3   38.00    4.30
   7  -3  -3   43.00    4.20
  -7  -3   3   46.80    4.20
  -7   3   3   46.30    4.10
   7   3  -3   48.10    4.20
  -6  -3   3   91.19    4.90
   6  -3  -3  102.49    5.40
  -6   3   3   90.19    4.80
   6   3  -3   95.39    5.10
  -5  -3   3  468.45   16.50
  -5  -3   3  478.15   15.90
   5  -3  -3  452.05   16.60
  -5   3   3  479.25   16.50
   5   3  -3  449.36   16.50
  -4  -3   3  366.66   12.60
   4  -3  -3  337.17   12.60
  -4  -3   3  358.76   12.20
   4  -3  -3  355.86   12.10
  -4   3   3  356.76   12.50
   4   3  -3  348.77   12.50
   3  -3  -3  637.44   20.70
  -3  -3   3  597.44   20.90
  -3  -3   3  618.04   20.70
  -3   3   3  617.44   21.00
   3   3  -3  607.64   20.80
  -3   3   3  611.54   20.80
  -2  -3   3 3511.25  115.59
  -2  -3   3 3484.05  115.69
  -2   3   3 3632.34  115.59
  -2   3   3 3475.55  115.49
   2   3  -3 3549.84  115.49
  -2   3   3 3479.75  115.69
  -1  -3   3    2.10    0.80
  -1  -3   3    1.20    0.50
  -1   3   3    1.40    0.50
  -1   3   3    1.10    0.80
  -1   3   3    0.00    0.70
   1   3  -3    2.10    0.70
   0  -3   3  616.24   20.90
   0  -3  -3  638.14   20.60
   0  -3  -3  621.14   20.90
   0  -3   3  636.44   20.60
   0   3   3  607.84   20.90
   0   3  -3  619.44   20.90
   1  -3   3 4484.65  147.29
  -1  -3  -3 4542.95  147.09
   1  -3   3 4459.65  147.09
  -1  -3  -3 4414.56  146.89
   1   3   3 4543.25  147.29
  -1   3  -3 4478.55  147.09
   2  -3   3    3.60    0.80
   2  -3   3    2.70    0.90
  -2  -3  -3    4.20    0.90
  -2  -3  -3    2.40    0.90
   2   3   3    3.90    1.20
  -2   3  -3    5.00    1.10
   3  -3   3    0.00    1.10
  -3  -3  -3    0.80    0.90
  -3  -3  -3    0.90    0.90
   3  -3   3   -0.70    0.70
   3   3   3   -1.40    1.10
  -3   3  -3   -0.60    1.20
  -4  -3  -3   22.70    1.80
  -4  -3  -3   19.20    2.10
   4  -3   3   22.10    1.60
   4  -3   3   22.80    2.40
   4   3   3   22.40    2.50
  -4   3  -3   16.30    2.00
   5  -3   3  141.89    6.30
  -5  -3  -3  134.49    6.00
   5   3   3  131.49    6.30
  -5   3  -3  121.79    5.90
   6  -3   3   56.79    4.50
  -6  -3  -3   64.19    4.10
   6   3   3   56.79    4.60
  -6   3  -3   56.89    4.10
   7  -3   3   78.99    5.90
  -7  -3  -3   76.29    5.60
  -7   3  -3   87.59    5.80
   7   3   3   90.89    6.60
  -8  -3  -3   59.29    5.30
   8  -3   3   57.39    6.70
  -8   3  -3   60.39    5.40
   8   3   3   52.19    6.00
  -9  -3  -3   27.60    4.70
   9  -3   3   24.50    5.70
  -9   3  -3   33.00    4.90
   9   3   3   23.40    5.50
  10   4  -3  135.49   10.40
  -9  -4   3   22.70    4.40
   9  -4  -3   21.90    4.40
  -9   4   3   18.70    4.10
   9   4  -3   25.10    4.40
   8  -4  -3   50.89    5.10
  -8  -4   3   43.80    4.40
  -8   4   3   43.70    4.70
   8   4  -3   48.00    5.50
   7  -4  -3   18.40    3.10
  -7  -4   3   20.70    3.00
  -7   4   3   15.00    2.60
   7   4  -3   17.80    3.20
   6  -4  -3   95.29    5.10
  -6  -4   3   80.99    4.80
  -6   4   3   98.89    5.10
   6   4  -3   90.19    4.90
  -5  -4   3  188.38    7.50
   5  -4  -3  175.38    7.50
  -5  -4   3  198.58    6.90
  -5   4   3  183.28    7.40
   5   4  -3  182.98    7.40
   4  -4  -3   65.29    3.60
  -4  -4   3   69.39    3.50
  -4  -4   3   73.59    3.10
   4  -4  -3   67.19    3.00
   4   4  -3   61.49    3.30
  -4   4   3   72.09    3.30
  -3  -4   3  200.38    7.20
   3  -4  -3  203.38    7.10
  -3  -4   3  202.38    7.30
  -3   4   3  187.68    7.40
  -3   4   3  192.28    7.10
   3   4  -3  192.58    7.10
  -2  -4   3   14.60    1.40
  -2  -4   3   13.70    1.50
   2  -4  -3   12.00    1.30
  -2   4   3   13.50    1.20
  -2   4   3   14.20    1.50
   2   4  -3   12.90    1.20
  -1  -4   3   13.90    1.40
   1  -4  -3   10.10    1.10
   1   4  -3   12.40    1.30
  -1   4   3   15.70    1.50
  -1   4   3   16.50    0.90
   0  -4  -3 2411.76   78.09
   0  -4   3 2410.36   77.89
   0  -4  -3 2416.86   77.69
   0  -4   3 2380.16   78.09
   0   4   3 2359.16   78.09
   0   4  -3 2258.67   77.99
  -1  -4  -3   14.90    1.10
   1  -4   3   12.30    1.20
  -1  -4  -3   13.60    1.40
   1  -4   3   11.60    1.20
   1   4   3    9.10    1.20
  -1   4  -3   14.20    1.40
   2  -4   3   85.79    3.40
  -2  -4  -3   82.89    3.60
  -2  -4  -3   88.19    3.40
   2  -4   3   85.29    3.60
  -2   4  -3   83.39    3.70
   2   4   3   90.69    3.90
  -3  -4  -3  118.09    4.80
  -3  -4  -3  121.59    4.60
   3  -4   3  126.59    5.00
   3  -4   3  115.39    4.40
  -3   4  -3  103.09    4.80
   3   4   3  117.69    5.20
   4  -4   3  432.46   15.30
  -4  -4  -3  436.16   14.60
  -4  -4  -3  413.16   15.00
   4  -4   3  441.16   14.40
  -4   4  -3  410.36   15.10
   4   4   3  423.36   15.40
  -5  -4  -3   45.00    3.20
   5  -4   3   46.50    3.90
   5   4   3   48.00    3.80
  -5   4  -3   46.90    3.40
  -6  -4  -3  251.17   10.00
   6  -4   3  241.48   10.30
   6   4   3  251.77   10.50
  -6   4  -3  246.08   10.10
   7  -4   3   12.70    3.60
  -7  -4  -3    8.80    2.70
   7   4   3    8.90    3.20
  -7   4  -3    8.50    2.80
  -8  -4  -3   34.50    4.40
   8  -4   3   28.70    4.60
   8   4   3   37.70    5.00
  -8   4  -3   40.00    4.30
  -9  -4  -3   84.29    7.00
   9  -4   3   89.39    7.90
   9   4   3   90.29    8.30
  -9   4  -3   97.49    7.40
  10   5  -3   33.30    6.40
  -9  -5   3    5.30    3.60
   9  -5  -3    0.90    4.00
  -9   5   3   -0.60    3.40
   9   5  -3    3.30    4.10
  -8  -5   3   43.00    4.60
   8  -5  -3   38.90    4.40
   8   5  -3   42.90    4.60
  -8   5   3   34.20    3.90
   7  -5  -3    5.70    2.50
  -7  -5   3    9.70    2.60
   7   5  -3    3.40    2.40
  -7   5   3    6.40    2.40
  -6  -5   3    1.00    1.80
   6  -5  -3   -0.30    2.10
   6   5  -3    1.00    1.90
  -6   5   3    0.40    1.70
   5  -5  -3 1427.96   48.50
  -5  -5   3 1516.95   47.80
  -5  -5   3 1417.56   48.30
  -5   5   3 1421.66   48.20
   5   5  -3 1417.36   48.30
  -4  -5   3  267.37    9.30
   4  -5  -3  253.67    9.20
  -4  -5   3  272.37    9.70
  -4   5   3  262.67    9.80
   4   5  -3  263.07    9.60
  -4   5   3  252.07    9.50
  -3  -5   3 1268.27   41.40
   3  -5  -3 1269.37   41.30
  -3  -5   3 1243.78   41.50
  -3   5   3 1221.38   41.30
   3   5  -3 1237.48   41.30
  -3   5   3 1227.68   41.60
   2  -5  -3  382.36   13.30
  -2  -5   3  371.06   13.40
  -2  -5   3  393.96   13.40
  -2   5   3  382.96   13.50
   2   5  -3  401.66   13.10
  -2   5   3  401.66   13.20
  -1  -5   3  312.47   11.00
   1  -5  -3  310.27   11.00
  -1   5   3  324.37   10.50
   1   5  -3  309.57   10.90
   1   5  -3  327.17   10.50
  -1   5   3  308.87   11.00
   0  -5  -3 1987.20   63.69
   0  -5  -3 1937.01   64.29
   0  -5   3 1967.80   64.29
   0  -5   3 1987.80   63.79
   0   5   3 1913.11   64.29
   0   5  -3 1895.61   64.19
   1  -5   3  202.48    7.00
  -1  -5  -3  194.18    7.10
  -1  -5  -3  197.38    6.60
   1  -5   3  194.78    6.80
   1   5   3  185.58    7.10
  -1   5  -3  184.78    7.00
   2  -5   3    7.30    1.20
   2  -5   3    4.50    0.90
  -2  -5  -3    5.50    1.10
  -2  -5  -3    3.70    0.90
   2   5   3    3.00    1.20
  -2   5  -3    3.30    1.10
   3  -5   3 1677.13   54.69
  -3  -5  -3 1640.94   54.89
   3  -5   3 1674.03   55.19
  -3  -5  -3 1641.34   54.99
   3   5   3 1684.33   55.39
  -3   5  -3 1637.64   55.19
   4  -5   3  339.17   11.90
  -4  -5  -3  321.07   11.50
   4  -5   3  321.07   11.00
  -4  -5  -3  337.57   11.30
  -4   5  -3  299.27   11.70
   4   5   3  300.17   11.90
  -5  -5  -3  130.39    5.70
   5  -5   3  132.39    6.10
  -5   5  -3  132.19    5.90
   5   5   3  123.59    6.40
  -6  -5  -3    1.30    2.00
   6  -5   3    4.80    2.40
   6   5   3    0.10    2.40
  -6   5  -3    3.30    2.40
   7  -5   3    5.90    3.00
  -7  -5  -3    6.80    2.70
  -7   5  -3    6.20    2.70
   7   5   3    1.80    2.90
   8  -5   3    3.00    3.60
  -8  -5  -3    0.30    2.90
  -8   5  -3    0.90    3.10
   8   5   3    6.60    3.80
   9  -5   3    9.10    4.70
  -9  -5  -3   10.80    4.10
   9   5   3   14.00    5.80
  -9   5  -3    7.20    4.20
  10   6  -3    3.30    4.80
   9  -6  -3   34.20    4.80
  -9  -6   3   27.60    4.40
   9   6  -3   27.10    4.60
  -9   6   3   28.60    4.40
  -8  -6   3  182.18    8.70
   8  -6  -3  188.88    9.30
   8   6  -3  191.98    9.30
  -8   6   3  171.18    8.80
  -7  -6   3   99.19    5.60
   7  -6  -3   97.09    5.80
  -7   6   3   92.59    5.40
   7   6  -3  108.09    6.20
   6  -6  -3    6.90    2.20
  -6  -6   3    3.80    1.90
  -6   6   3    3.40    1.90
   6   6  -3    4.90    2.20
  -5  -6   3    1.20    1.20
   5  -6  -3   -1.40    1.50
  -5  -6   3    1.90    1.80
   5   6  -3    1.30    1.60
  -5   6   3    0.40    1.60
  -4  -6   3    3.50    1.30
   4  -6  -3    7.30    1.20
  -4  -6   3    8.80    1.30
   4   6  -3    6.60    1.40
  -4   6   3    8.10    1.50
  -4   6   3   13.00    1.90
   3  -6  -3  305.57   10.60
  -3  -6   3  285.57   10.80
  -3  -6   3  311.27   10.70
   3   6  -3  295.87   10.60
  -3   6   3  308.17   10.60
  -3   6   3  307.87   10.90
   2  -6  -3   20.80    1.60
  -2  -6   3   20.60    1.80
  -2  -6   3   19.30    1.60
  -2   6   3   20.30    1.80
  -2   6   3   18.20    1.40
   2   6  -3   18.60    1.30
  -1  -6   3  759.22   26.10
   1  -6  -3  763.62   26.10
  -1   6   3  796.92   25.60
   1   6  -3  770.82   25.50
  -1   6   3  786.82   26.10
   1   6  -3  781.32   26.00
   0  -6   3   55.89    2.70
   0  -6  -3   53.49    2.70
   0  -6   3   60.39    2.10
   0   6   3   57.29    2.80
  -1  -6  -3  958.80   32.00
   1  -6   3  941.81   31.90
  -1  -6  -3  987.00   31.60
   1  -6   3  973.50   31.70
   1   6   3  936.61   32.10
  -1   6  -3  943.31   32.00
  -2  -6  -3   69.79    3.00
  -2  -6  -3   78.79    3.30
   2  -6   3   65.89    3.10
   2  -6   3   69.49    3.10
   2   6   3   69.59    3.40
  -2   6  -3   73.89    3.40
  -3  -6  -3  455.75   15.40
   3  -6   3  453.65   15.20
  -3  -6  -3  452.25   15.40
   3  -6   3  456.15   15.60
   3   6   3  439.16   15.80
  -3   6  -3  421.76   15.60
  -4  -6  -3   33.30    2.50
   4  -6   3   45.20    3.20
  -4  -6  -3   37.70    2.50
   4  -6   3   37.10    2.10
   4   6   3   40.60    3.10
  -4   6  -3   39.50    2.80
  -5  -6  -3  103.69    5.00
   5  -6   3   97.19    5.30
  -5   6  -3   83.59    4.80
   5   6   3  104.29    5.40
  -6  -6  -3  345.57   12.80
   6  -6   3  344.87   13.10
   6   6   3  339.07   13.40
  -6   6  -3  314.87   12.80
  -7  -6  -3   43.70    4.20
   7  -6   3   34.40    4.20
  -7   6  -3   34.80    3.80
   7   6   3   36.50    4.40
  -8  -6  -3   82.89    6.50
   8  -6   3   78.29    7.40
  -8   6  -3   82.49    6.70
   8   6   3   88.89    7.00
   9  -6   3    2.20    4.90
  -9  -6  -3    1.30    4.40
   9   6   3    2.60    5.40
  -9   6  -3    1.20    4.00
  10   7  -3   64.19    7.40
  -9  -7   3   41.80    5.00
   9  -7  -3   46.30    5.50
   9   7  -3   30.90    4.80
  -9   7   3   43.70    5.00
   8  -7  -3   33.80    4.10
  -8  -7   3   29.10    3.90
   8   7  -3   25.80    3.90
  -8   7   3   24.90    3.90
   7  -7  -3    8.60    3.00
  -7  -7   3    5.70    2.50
  -7   7   3    7.20    2.40
   7   7  -3   10.60    3.10
  -6  -7   3  312.47   12.30
   6  -7  -3  316.37   12.50
   6   7  -3  331.37   12.50
  -6   7   3  338.47   12.30
   5  -7  -3  244.28    9.60
  -5  -7   3  243.48    8.90
  -5  -7   3  243.48    9.40
  -5   7   3  248.68    9.20
   5   7  -3  236.18    9.30
  -4  -7   3   43.60    2.90
   4  -7  -3   43.70    2.60
  -4  -7   3   51.39    2.80
   4   7  -3   45.10    2.80
  -4   7   3   51.29    2.70
  -4   7   3   48.80    3.10
  -3  -7   3  424.86   15.00
  -3  -7   3  443.86   15.00
   3  -7  -3  428.46   14.90
  -3   7   3  411.86   15.10
   3   7  -3  439.36   14.80
  -3   7   3  439.36   14.80
   2  -7  -3   22.70    1.70
  -2  -7   3   15.20    1.60
  -2  -7   3   18.50    1.70
   2   7  -3   17.60    1.30
  -2   7   3   17.90    1.80
  -2   7   3   18.70    1.30
  -1  -7   3 1613.74   54.39
   1  -7  -3 1602.44   54.29
   1   7  -3 1630.24   54.29
  -1   7   3 1684.13   53.79
   1   7  -3 1695.03   53.69
  -1   7   3 1613.04   54.39
   0  -7  -3 1979.00   67.29
   0  -7   3 2093.49   66.69
   0  -7   3 2046.60   67.29
   0   7  -3 2055.79   67.29
   0   7   3 2013.40   67.39
  -1  -7  -3   69.99    2.60
   1  -7   3   67.29    3.10
  -1  -7  -3   67.39    3.20
   1  -7   3   71.09    2.80
  -1   7  -3   66.99    3.10
   1   7   3   60.79    3.20
  -2  -7  -3   71.59    3.30
   2  -7   3   69.09    3.20
  -2  -7  -3   72.99    2.90
   2  -7   3   73.49    3.20
  -2   7  -3   69.69    3.40
   2   7   3   64.19    3.40
   3  -7   3  145.79    5.70
   3  -7   3  147.09    5.40
  -3  -7  -3  137.69    5.60
  -3  -7  -3  132.09    5.40
   3   7   3  144.39    6.00
  -3   7  -3  137.29    5.70
   4  -7   3   24.30    1.90
   4  -7   3   32.60    2.60
  -4  -7  -3   19.90    2.00
  -4  -7  -3   26.40    2.30
  -4   7  -3   19.90    2.20
   4   7   3   25.20    2.70
  -5  -7  -3   -0.70    1.50
   5  -7   3   -0.40    1.80
  -5   7  -3    1.00    1.60
   5   7   3    1.50    2.10
  -6  -7  -3   53.59    4.30
   6  -7   3   56.99    4.50
  -6   7  -3   46.70    4.10
   6   7   3   54.09    4.70
   7  -7   3   14.60    3.30
  -7  -7  -3   14.70    3.00
   7   7   3    9.70    3.40
  -7   7  -3   12.00    2.90
  -8  -7  -3    0.40    3.40
   8  -7   3   -1.60    3.40
  -8   7  -3   -0.10    3.60
   8   7   3    3.30    3.90
   9  -7   3    7.90    4.70
  -9  -7  -3   21.40    5.00
   9   7   3   21.50    5.60
  -9   7  -3   18.50    4.80
  10   8  -3    2.10    5.50
   9  -8  -3    5.10    4.10
  -9  -8   3    7.90    3.90
  -9   8   3    4.80    3.70
   9   8  -3    7.30    4.30
  -8  -8   3   48.30    4.80
   8  -8  -3   52.69    5.30
   8   8  -3   50.79    5.70
  -8   8   3   49.40    4.70
   7  -8  -3    0.20    2.40
  -7  -8   3   -0.80    2.30
   7   8  -3   -2.90    2.70
  -7   8   3    1.70    2.20
   6  -8  -3   67.09    4.80
  -6  -8   3   69.09    4.50
   6   8  -3   76.79    4.50
  -6   8   3   69.19    4.50
  -5  -8   3   50.29    3.10
   5  -8  -3   51.89    3.60
  -5  -8   3   52.69    3.40
  -5   8   3   48.70    3.30
   5   8  -3   43.50    3.40
   4  -8  -3  572.34   19.40
  -4  -8   3  564.14   19.70
  -4  -8   3  569.54   19.50
   4   8  -3  577.94   19.60
  -4   8   3  561.34   19.50
  -3  -8   3  121.79    5.20
   3  -8  -3  126.89    5.10
  -3  -8   3  132.89    5.20
  -3   8   3  133.39    5.00
   3   8  -3  128.39    5.00
  -3   8   3  119.19    5.30
  -2  -8   3  349.57   12.50
   2  -8  -3  362.26   12.50
  -2   8   3  336.07   12.50
   2   8  -3  364.16   12.40
  -2   8   3  363.56   12.10
   2   8  -3  354.56   12.00
   1  -8  -3    3.80    1.10
  -1  -8   3    6.80    1.30
   1   8  -3    5.40    0.50
  -1   8   3    2.80    1.00
  -1   8   3    6.00    0.60
   1   8  -3    4.10    1.10
   0  -8   3 3788.62  120.19
   0  -8   3 3608.24  120.59
   0  -8  -3 3643.74  120.69
   0   8   3 3602.84  120.69
   0   8  -3 3695.03  120.59
  -1  -8  -3    0.30    0.50
   1  -8   3    0.90    0.70
  -1  -8  -3   -1.10    0.90
   1  -8   3    0.40    0.90
  -1   8  -3    0.30    1.00
   1   8   3    1.10    1.00
  -2  -8  -3  542.65   18.00
   2  -8   3  532.45   18.20
  -2  -8  -3  516.75   18.40
   2  -8   3  558.54   18.20
   2   8   3  525.95   18.50
  -2   8  -3  531.35   18.40
   3  -8   3   50.29    2.80
  -3  -8  -3   44.80    2.50
  -3  -8  -3   52.59    2.90
   3  -8   3   48.10    2.50
  -3   8  -3   39.20    2.80
   3   8   3   44.10    3.00
  -4  -8  -3   19.00    1.90
   4  -8   3   24.70    2.70
   4  -8   3   21.30    1.90
  -4  -8  -3   20.80    2.20
  -4   8  -3   19.80    2.30
   4   8   3   24.90    2.80
  -5  -8  -3  186.88    7.40
   5  -8   3  180.48    7.70
  -5   8  -3  175.28    7.60
   5   8   3  177.88    8.20
  -6  -8  -3   23.70    3.10
   6  -8   3   23.50    3.40
  -6   8  -3   21.30    3.00
   6   8   3   26.10    3.80
   7  -8   3   81.89    6.30
  -7  -8  -3   77.99    5.70
   7   8   3   81.19    6.20
  -7   8  -3   82.19    5.50
  -8  -8  -3  131.69    7.30
   8  -8   3  117.49    7.90
   8   8   3  135.99    9.10
  -8   8  -3  121.89    7.90
  -9  -8  -3  117.79    7.90
   9  -8   3  114.79    8.90
   9   8   3  133.99    9.60
  -9   8  -3  107.49    8.20
  10   9  -3    5.50    6.10
   9  -9  -3    3.50    3.90
  -9  -9   3    1.90    3.90
   9   9  -3    4.00    4.40
  -9   9   3    2.70    3.90
   8  -9  -3   29.40    4.20
  -8  -9   3   29.80    4.00
  -8   9   3   33.30    4.10
   8   9  -3   27.50    4.40
  -7  -9   3    1.40    2.40
   7  -9  -3    2.20    2.90
   7   9  -3    1.60    2.80
  -7   9   3    1.50    2.50
  -6  -9   3  777.72   27.30
   6  -9  -3  798.12   27.50
   6   9  -3  806.22   27.30
  -6   9   3  748.03   27.00
  -5  -9   3   78.19    4.30
   5  -9  -3   81.59    4.70
  -5  -9   3   82.69    4.00
   5   9  -3   71.99    4.30
  -5   9   3   80.39    4.20
   4  -9  -3    5.30    1.40
  -4  -9   3    7.50    1.50
  -4  -9   3    7.00    1.70
  -4   9   3    8.60    1.80
  -4   9   3    6.50    1.40
   4   9  -3    6.70    1.40
  -3  -9   3  146.99    5.80
   3  -9  -3  133.19    5.70
  -3  -9   3  145.09    5.80
   3   9  -3  146.29    5.50
  -3   9   3  150.98    5.50
  -3   9   3  140.69    6.00
   2  -9  -3  385.36   13.50
  -2  -9   3  384.36   13.50
  -2   9   3  391.26   13.00
   2   9  -3  382.56   13.40
  -2   9   3  366.06   13.50
   2   9  -3  389.96   13.00
   1  -9  -3    0.30    1.00
  -1  -9   3   -0.60    1.00
  -1   9   3    0.50    0.50
  -1   9   3   -0.90    1.00
   1   9  -3    0.50    0.40
   1   9  -3    1.30    1.10
   0  -9   3 1980.40   62.79
   0  -9  -3 1841.32   63.49
   0  -9   3 1959.60   63.49
   0   9   3 1899.31   63.49
   0   9  -3 1900.11   63.39
   1  -9   3   29.70    1.60
   1  -9   3   24.40    2.00
  -1  -9  -3   27.50    2.20
  -1  -9  -3   29.90    1.40
  -1   9  -3   31.10    2.20
   1   9   3   24.30    2.10
  -2  -9  -3 3020.10   97.39
   2  -9   3 3061.39   97.69
   2  -9   3 2993.70   97.59
  -2  -9  -3 2975.50   97.89
  -2   9  -3 2871.11   97.79
   2   9   3 2873.01   97.99
   3  -9   3   28.90    2.20
   3  -9   3   32.60    2.50
  -3  -9  -3   29.60    2.60
  -3  -9  -3   29.10    2.10
   3   9   3   29.40    2.60
  -3   9  -3   29.80    2.50
   4  -9   3  392.16   13.30
  -4  -9  -3  374.16   13.50
   4  -9   3  375.76   13.80
  -4  -9  -3  387.76   13.60
  -4   9  -3  376.56   13.90
   4   9   3  380.96   14.10
  -5  -9  -3   -0.40    1.60
   5  -9   3   -1.20    1.80
   5   9   3    2.20    2.20
  -5   9  -3    0.60    1.90
   6  -9   3   18.60    3.00
  -6  -9  -3   16.60    2.90
  -6   9  -3   17.60    3.20
   6   9   3   19.90    3.60
   7  -9   3   33.70    4.10
  -7  -9  -3   30.80    3.60
  -7   9  -3   28.50    3.80
   7   9   3   32.60    4.40
   8  -9   3   85.69    6.90
  -8  -9  -3   83.69    6.00
   8   9   3   81.49    8.00
  -8   9  -3   77.99    6.90
  -9  -9  -3    0.70    4.60
   9  -9   3   -1.90    5.20
   9   9   3    2.50    5.20
  10  10  -3   40.90    6.60
  -9 -10   3   54.79    5.70
   9 -10  -3   66.19    6.80
  -9  10   3   46.00    5.20
   9  10  -3   64.99    6.50
  -8 -10   3  139.19    7.90
   8 -10  -3  157.28    8.30
   8  10  -3  163.08    8.30
  -8  10   3  149.19    8.00
   7 -10  -3  311.97   12.70
  -7 -10   3  298.17   12.20
   7  10  -3  310.57   12.50
  -7  10   3  302.27   12.20
   6 -10  -3   32.00    3.80
  -6 -10   3   42.20    3.70
  -6  10   3   32.70    3.40
   6  10  -3   43.10    3.70
  -5 -10   3   56.99    3.70
  -5 -10   3   61.69    3.40
  -5  10   3   53.49    3.90
   5  10  -3   49.10    3.60
  -5  10   3   51.09    3.60
  -4 -10   3    2.30    1.40
  -4 -10   3    2.80    1.40
   4 -10  -3    0.50    1.20
  -4  10   3    1.50    1.20
   4  10  -3    0.50    1.30
  -4  10   3    1.30    1.50
   3 -10  -3  635.24   22.10
  -3 -10   3  614.64   22.10
  -3 -10   3  669.03   22.20
   3  10  -3  663.13   21.90
  -3  10   3  630.74   22.30
  -3  10   3  663.63   21.80
  -2 -10   3  739.63   25.10
   2 -10  -3  720.73   25.10
   2  10  -3  731.63   25.00
  -2  10   3  757.02   24.60
   2  10  -3  757.82   24.60
  -2  10   3  716.13   25.10
  -1 -10   3   49.00    2.80
   1 -10  -3   50.19    2.80
   1  10  -3   47.20    1.90
   1  10  -3   47.00    2.70
  -1  10   3   49.40    1.90
  -1  10   3   43.50    2.70
   0 -10   3  143.19    6.10
   0 -10  -3  159.38    6.20
   0  10  -3  155.78    6.00
   0  10   3  160.28    5.20
   0  10   3  157.58    6.20
  -1 -10  -3 1497.25   50.79
   1 -10   3 1493.85   50.69
   1 -10   3 1551.64   50.19
  -1 -10  -3 1556.34   50.09
   1  10   3 1520.25   50.79
  -1  10  -3 1516.95   50.69
   2 -10   3   88.89    4.00
  -2 -10  -3   86.79    3.50
  -2 -10  -3   92.59    4.30
   2 -10   3   87.69    3.80
   2  10   3   89.99    4.20
  -2  10  -3   85.19    4.10
   3 -10   3   19.90    1.90
  -3 -10  -3   19.60    2.10
   3 -10   3   20.70    2.20
  -3 -10  -3   17.50    1.80
  -3  10  -3   21.80    2.30
   3  10   3   16.20    2.10
  -4 -10  -3    0.30    1.50
  -4 -10  -3   -0.80    1.40
   4 -10   3    0.30    1.60
   4 -10   3   -0.90    1.20
  -4  10  -3    0.30    1.60
   4  10   3    2.00    1.80
  -5 -10  -3  190.98    7.60
   5 -10   3  188.88    8.00
   5  10   3  194.88    8.40
  -5  10  -3  176.08    7.90
   6 -10   3    9.50    2.90
  -6 -10  -3    5.70    2.60
  -6  10  -3    6.80    2.50
   6  10   3    6.50    3.20
  -7 -10  -3    0.60    2.90
   7 -10   3    1.10    2.90
   7  10   3    0.40    3.20
  -7  10  -3   -0.40    2.70
   8 -10   3   18.50    4.70
  -8 -10  -3   26.40    4.00
   8  10   3   31.90    5.20
  -8  10  -3   29.10    4.40
  -9 -10  -3   15.50    4.50
   9 -10   3   16.60    5.30
   9 -11  -3    8.50    4.80
  -9 -11   3    4.40    4.00
   9  11  -3    5.20    4.70
  -9  11   3    3.50    3.70
   8 -11  -3    8.10    3.60
  -8 -11   3    5.10    3.50
   8  11  -3   10.20    3.90
  -8  11   3   12.90    3.30
   7 -11  -3   35.60    4.20
  -7 -11   3   32.10    3.90
   7  11  -3   41.10    4.20
  -7  11   3   33.10    3.80
   6 -11  -3  247.38   10.30
  -6 -11   3  244.38   10.00
   6  11  -3  264.27   10.20
  -6  11   3  236.48    9.70
  -5 -11   3  611.24   21.40
  -5 -11   3  607.44   21.70
  -5  11   3  627.24   22.00
   5  11  -3  616.64   21.60
  -5  11   3  625.94   21.50
   4 -11  -3   10.20    1.70
  -4 -11   3    7.80    1.70
  -4 -11   3   10.00    1.80
  -4  11   3    9.40    1.60
  -4  11   3    9.90    2.10
   4  11  -3    8.70    1.70
  -3 -11   3   27.60    2.30
   3 -11  -3   24.30    2.40
  -3 -11   3   27.20    2.50
   3  11  -3   25.40    2.00
  -3  11   3   28.60    2.80
  -3  11   3   29.80    2.00
   2 -11  -3  140.69    6.10
  -2 -11   3  154.18    6.20
   2  11  -3  154.48    5.50
  -2  11   3  158.28    5.50
   2  11  -3  159.18    6.00
  -2  11   3  142.79    6.10
  -1 -11   3  355.86   13.40
   1 -11  -3  383.26   13.50
  -1  11   3  362.66   13.40
   1  11  -3  372.26   13.30
  -1  11   3  400.56   12.70
   1  11  -3  389.76   12.70
   0 -11  -3   77.79    3.90
   0 -11   3   80.39    3.80
   0  11  -3   83.29    3.70
   0  11   3   69.89    3.70
   0  11  -3   79.09    3.00
   0  11   3   83.89    2.80
  -1 -11  -3  537.55   18.30
   1 -11   3  532.85   17.70
   1 -11   3  524.15   18.20
  -1  11  -3  517.75   18.10
   1  11   3  511.55   18.20
  -2 -11  -3  315.67   11.00
   2 -11   3  332.97   11.30
  -2 -11  -3  337.87   11.70
   2 -11   3  309.57   11.40
  -2  11  -3  324.17   11.60
   2  11   3  305.47   11.70
  -3 -11  -3  712.03   24.70
  -3 -11  -3  755.62   25.20
   3 -11   3  744.93   25.00
   3 -11   3  738.33   24.90
   3  11   3  706.43   25.30
  -3  11  -3  736.93   25.20
  -4 -11  -3    4.50    1.70
  -4 -11  -3    4.90    1.60
   4 -11   3    3.80    1.40
   4 -11   3    5.90    1.70
  -4  11  -3    7.60    1.90
   4  11   3    5.30    2.00
   5 -11   3   14.00    2.60
  -5 -11  -3   10.90    2.20
   5  11   3   14.80    3.00
  -5  11  -3   15.70    2.60
   6 -11   3   19.60    3.10
  -6 -11  -3   16.00    2.90
  -6  11  -3   21.50    3.40
   6  11   3   21.50    3.80
   7 -11   3   68.89    5.70
  -7 -11  -3   74.49    5.70
   7  11   3   68.79    6.60
  -7  11  -3   85.19    5.70
   8 -11   3   10.30    4.50
  -8 -11  -3   16.20    3.70
   8  11   3   19.50    4.70
  -8  11  -3   18.70    4.10
   9 -11   3   -0.10    5.30
  -9 -11  -3    6.80    4.70
  -9 -12   3    2.40    4.10
   9 -12  -3    5.00    4.40
  -9  12   3    3.20    3.90
   9  12  -3    5.50    5.00
  -8 -12   3   28.30    4.10
   8 -12  -3   33.90    4.60
  -8  12   3   28.20    3.90
   8  12  -3   32.10    4.70
   7 -12  -3    3.50    3.20
  -7 -12   3    2.00    2.50
  -7  12   3    2.00    2.80
   7  12  -3    0.50    2.60
   6 -12  -3    2.30    2.40
  -6 -12   3    5.20    2.30
  -6  12   3    4.90    2.10
   6  12  -3    4.00    2.60
  -5 -12   3   51.29    3.40
  -5 -12   3   49.90    3.70
  -5  12   3   47.60    3.90
   5  12  -3   44.50    3.60
  -5  12   3   46.60    3.40
   4 -12  -3  177.98    7.00
  -4 -12   3  173.28    7.00
  -4 -12   3  174.88    7.20
  -4  12   3  165.88    7.30
  -4  12   3  174.78    6.80
   4  12  -3  168.78    6.80
  -3 -12   3   11.60    1.70
   3 -12  -3   12.00    1.80
  -3 -12   3   10.00    1.70
  -3  12   3   11.00    1.40
  -3  12   3    7.70    1.80
   3  12  -3    8.80    1.30
  -2 -12   3  198.48    7.60
   2 -12  -3  180.98    7.50
   2  12  -3  197.38    7.50
  -2  12   3  186.78    7.60
   2  12  -3  199.48    7.00
  -2  12   3  204.68    7.00
   1 -12  -3   56.59    3.30
  -1 -12   3   49.40    3.10
   1  12  -3   56.99    2.30
  -1  12   3   56.79    3.10
  -1  12   3   58.49    2.30
   1  12  -3   58.89    3.10
   0 -12   3    0.70    1.20
   0 -12  -3    1.60    1.30
   0  12  -3    1.70    0.70
   0  12  -3    2.40    1.20
   0  12   3    0.80    1.20
   0  12   3    1.80    0.60
  -1 -12  -3  146.59    6.00
   1 -12   3  132.39    5.80
   1 -12   3  151.98    5.30
   1  12   3  140.69    5.90
  -1  12  -3  129.99    5.80
   1  12   3  149.79    5.10
   2 -12   3  341.27   13.00
  -2 -12  -3  368.56   13.30
   2 -12   3  387.16   12.80
  -2 -12  -3  374.76   12.60
  -2  12  -3  371.16   13.20
   2  12   3  355.96   13.30
  -3 -12  -3    0.20    1.10
   3 -12   3    1.40    1.30
  -3 -12  -3   -0.30    1.50
   3 -12   3   -0.40    1.30
   3  12   3   -0.40    1.60
  -3  12  -3    3.40    1.60
   4 -12   3  340.97   12.90
  -4 -12  -3  345.57   12.90
  -4 -12  -3  362.06   12.70
   4 -12   3  353.46   12.60
  -4  12  -3  354.16   13.10
   4  12   3  363.76   13.50
  -5 -12  -3   64.79    4.10
   5 -12   3   66.09    4.30
  -5  12  -3   66.19    4.50
   5  12   3   68.09    4.80
   6 -12   3    8.60    2.80
  -6 -12  -3    9.60    2.50
  -6  12  -3   13.20    2.90
   6  12   3   14.30    3.60
   7 -12   3   -2.00    2.90
  -7 -12  -3    2.70    3.00
  -7  12  -3    0.30    2.90
   7  12   3   -1.30    3.20
  -8 -12  -3   69.39    5.80
   8 -12   3   51.19    5.70
   8  12   3   61.69    6.70
  -8  12  -3   77.69    7.00
  -9 -12  -3   35.30    5.90
  -9 -13   3   29.00    5.10
   9 -13  -3   33.00    5.40
  -9  13   3   30.60    5.10
  -8 -13   3   13.00    3.60
   8 -13  -3   15.60    4.30
   8  13  -3   11.80    4.10
  -8  13   3   12.50    3.70
   7 -13  -3   65.39    5.50
  -7 -13   3   72.99    5.30
   7  13  -3   64.29    5.70
  -7  13   3   67.09    4.90
   6 -13  -3   -1.90    2.30
  -6 -13   3   -1.60    2.10
  -6  13   3    1.90    2.30
   6  13  -3    1.50    2.50
  -5 -13   3  106.79    5.20
  -5 -13   3  102.29    5.00
   5  13  -3   96.29    5.00
  -5  13   3   84.39    4.80
  -5  13   3  102.09    5.50
  -4 -13   3    3.80    1.60
  -4 -13   3   -0.30    1.60
   4 -13  -3    2.50    1.60
   4  13  -3    1.50    1.50
  -4  13   3    2.20    1.40
  -4  13   3    4.40    1.90
   3 -13  -3   73.99    4.10
  -3 -13   3   79.09    4.00
   3  13  -3   78.69    4.10
   3  13  -3   74.89    3.50
  -3  13   3   80.39    3.60
  -3  13   3   69.19    4.00
   2 -13  -3  596.24   21.30
  -2 -13   3  619.44   21.30
   2  13  -3  628.14   20.60
   2  13  -3  625.44   21.20
  -2  13   3  591.24   21.30
  -2  13   3  619.74   20.60
  -1 -13   3   90.39    4.40
   1 -13  -3   85.39    4.50
  -1  13   3   78.19    4.10
   1  13  -3   86.89    3.40
  -1  13   3   96.39    3.40
   1  13  -3   90.69    4.10
   0 -13  -3  146.29    6.30
   0 -13   3  142.79    6.20
   0  13  -3  151.58    5.40
   0  13  -3  147.39    6.00
   0  13   3  157.18    5.20
   0  13   3  151.48    6.20
   1 -13   3  206.68    8.30
   1 -13   3  223.58    7.80
  -1 -13  -3  222.08    8.50
  -1  13  -3  220.48    8.40
   1  13   3  221.98    7.50
   1  13   3  207.98    8.40
  -2 -13  -3   71.89    4.20
  -2 -13  -3   76.69    3.20
   2 -13   3   65.39    3.70
   2 -13   3   80.59    3.50
  -2  13  -3   77.09    3.90
   2  13   3   79.59    4.20
  -3 -13  -3  147.39    6.20
   3 -13   3  145.29    5.90
   3 -13   3  137.59    5.90
  -3 -13  -3  140.69    5.60
  -3  13  -3  140.99    6.10
   3  13   3  138.59    6.30
  -4 -13  -3  117.39    5.50
   4 -13   3  117.59    5.50
   4 -13   3  117.19    5.30
  -4 -13  -3  128.09    5.30
   4  13   3  124.79    6.10
  -4  13  -3  119.49    5.80
   5 -13   3   -0.10    2.20
  -5 -13  -3    1.40    1.90
  -5  13  -3   -3.90    2.30
   5  13   3   -0.20    2.30
  -6 -13  -3   34.70    3.50
   6 -13   3   31.40    3.70
   6  13   3   38.30    4.50
  -6  13  -3   33.80    3.70
  -7 -13  -3   68.29    5.20
   7 -13   3   78.79    6.50
   7  13   3   80.79    6.40
  -7  13  -3   67.29    5.70
  -8 -13  -3    0.40    3.70
   8 -13   3    1.10    4.40
   8  13   3    4.10    4.50
  -8  13  -3    2.00    3.70
  -9 -14   3    8.20    4.50
   9 -14  -3    8.10    4.70
  -9  14   3   12.00    4.50
  -8 -14   3  168.88    9.20
   8 -14  -3  160.48    9.10
  -8  14   3  166.98    8.80
  -7 -14   3   48.00    4.60
   7 -14  -3   35.40    4.60
   7  14  -3   49.00    5.20
  -7  14   3   41.70    4.10
   6 -14  -3   15.50    3.30
  -6 -14   3   16.90    2.90
  -6  14   3   13.20    2.50
   6  14  -3   10.40    2.70
  -5 -14   3  628.64   22.00
  -5 -14   3  621.14   22.20
  -5  14   3  634.34   22.50
  -5  14   3  630.04   21.80
   5  14  -3  623.54   22.00
   4 -14  -3    1.20    1.70
  -4 -14   3    1.20    1.90
  -4 -14   3    1.00    1.70
  -4  14   3    0.60    1.80
   4  14  -3    1.30    1.50
  -4  14   3    0.00    1.40
   3 -14  -3  702.63   25.00
  -3 -14   3  738.43   25.10
   3  14  -3  753.72   24.60
  -3  14   3  734.93   24.50
  -3  14   3  694.03   25.10
   3  14  -3  725.53   24.90
  -2 -14   3    6.10    1.70
   2 -14  -3    5.80    1.60
   2  14  -3    6.80    1.70
  -2  14   3    8.90    1.20
   2  14  -3    8.10    1.20
  -2  14   3    6.90    1.70
   1 -14  -3  882.71   29.80
  -1 -14   3  843.92   29.70
   1  14  -3  879.31   28.90
  -1  14   3  833.22   29.60
   1  14  -3  865.91   29.50
  -1  14   3  914.71   28.90
   0 -14  -3  132.79    5.90
   0 -14   3  128.89    5.80
   0  14   3  127.19    5.70
   0  14   3  140.49    4.80
   0  14  -3  135.59    5.00
   0  14  -3  140.99    5.60
  -1 -14  -3   11.30    2.00
   1 -14   3   10.40    1.70
   1  14   3   10.00    1.80
  -1  14  -3   18.40    2.00
   1  14   3   13.90    1.40
  -2 -14  -3  225.08    7.80
   2 -14   3  229.58    8.10
   2 -14   3  205.88    8.40
  -2 -14  -3  225.68    8.80
  -2  14  -3  227.88    8.60
   2  14   3  201.98    8.60
  -3 -14  -3   10.90    2.20
  -3 -14  -3   11.80    1.60
   3 -14   3   20.30    2.20
   3 -14   3   16.70    2.00
   3  14   3   16.10    2.50
  -3  14  -3   17.10    2.30
   4 -14   3  136.49    6.10
   4 -14   3  120.29    5.70
  -4 -14  -3  134.49    6.20
  -4 -14  -3  128.09    5.70
   4  14   3  130.29    6.70
  -4  14  -3  143.29    6.30
   5 -14   3    1.70    2.30
  -5 -14  -3    1.80    2.10
   5  14   3    3.00    2.90
  -5  14  -3    3.50    2.40
   6 -14   3   54.59    4.70
  -6 -14  -3   50.99    4.50
  -6  14  -3   56.99    5.30
   6  14   3   53.99    5.80
  -7 -14  -3   54.59    4.80
   7 -14   3   53.79    6.00
  -7  14  -3   48.50    4.90
   7  14   3   61.79    6.10
   8 -14   3    1.30    4.00
  -8  14  -3    2.80    3.90
   8  14   3    0.00    4.90
  -9 -15   3    2.00    5.00
  -9  15   3    8.40    4.20
   8 -15  -3    1.80    3.60
  -8 -15   3    0.10    3.40
  -8  15   3   -2.20    3.20
   7 -15  -3   38.20    4.70
  -7 -15   3   45.90    4.60
  -7  15   3   42.60    4.20
  -6 -15   3  476.95   17.50
   6 -15  -3  468.75   17.70
  -6  15   3  465.45   17.00
  -5 -15   3   15.40    2.70
  -5 -15   3   16.20    2.50
   5  15  -3   21.00    2.60
  -5  15   3   20.20    2.50
  -5  15   3   12.80    2.70
   4 -15  -3   10.80    2.10
  -4 -15   3   12.40    2.30
  -4 -15   3   12.50    2.20
  -4  15   3   11.30    2.60
  -4  15   3   11.30    1.90
   4  15  -3   11.40    2.00
   3 -15  -3  113.99    5.60
  -3 -15   3  124.59    5.60
   3  15  -3  122.29    5.00
   3  15  -3  119.39    5.40
  -3  15   3  119.29    5.70
  -3  15   3  122.79    5.00
  -2 -15   3   30.60    2.80
   2 -15  -3   28.20    3.10
   2  15  -3   26.90    2.00
   2  15  -3   28.80    2.50
  -2  15   3   26.90    2.00
  -2  15   3   23.40    2.60
  -1 -15   3   11.40    1.90
   1 -15  -3    9.20    1.90
   1  15  -3    9.40    1.10
   1  15  -3    9.60    1.70
  -1  15   3    8.20    1.70
  -1  15   3   12.40    1.10
   0 -15   3  368.26   13.80
   0 -15  -3  368.86   14.00
   0  15  -3  381.06   13.70
   0  15   3  387.16   13.90
   0  15  -3  393.76   13.10
   0  15   3  392.96   12.90
  -1 -15  -3   38.30    3.10
   1 -15   3   26.20    2.90
  -1  15  -3   40.50    2.90
  -1  15  -3   34.80    2.20
   1  15   3   40.00    2.00
   1  15   3   33.30    2.80
  -2 -15  -3 1078.39   36.40
   2 -15   3 1108.19   35.80
  -2 -15  -3 1096.19   35.50
   2 -15   3 1040.60   36.20
  -2  15  -3 1044.60   36.20
   2  15   3 1038.80   36.30
   3 -15   3  650.23   22.60
  -3 -15  -3  658.13   22.10
  -3 -15  -3  673.63   22.90
   3 -15   3  656.33   22.40
   3  15   3  631.44   22.90
  -3  15  -3  635.64   22.70
  -4 -15  -3  165.78    7.10
  -4 -15  -3  146.09    6.40
   4 -15   3  159.68    7.20
   4 -15   3  145.59    6.70
  -4  15  -3  154.98    7.00
   4  15   3  160.98    7.30
  -5 -15  -3   34.80    3.60
   5 -15   3   27.80    3.40
   5  15   3   37.40    4.00
  -5  15  -3   31.10    3.40
   6 -15   3    7.90    3.10
  -6 -15  -3    7.30    2.90
  -6  15  -3    5.30    2.80
   6  15   3    5.70    3.60
   7 -15   3   -1.70    3.00
  -7  15  -3   -0.60    3.60
   7  15   3   -0.80    4.00
   8 -15   3    6.80    4.90
   8  15   3   -3.40    4.50
  -8  15  -3    8.20    4.10
  -9  16   3    5.80    4.20
   8 -16  -3   27.80    5.20
  -8 -16   3   31.10    5.00
  -8  16   3   35.10    4.70
   7 -16  -3   11.70    3.50
  -7 -16   3   12.60    3.30
  -7  16   3    9.80    3.20
  -6 -16   3   15.60    3.20
   6 -16  -3   20.50    3.40
  -6  16   3   17.90    3.00
  -5 -16   3   54.59    4.10
  -5 -16   3   48.00    3.80
  -5  16   3   47.10    3.80
  -5  16   3   52.49    4.40
   4 -16  -3   14.40    2.40
  -4 -16   3   14.90    2.40
  -4  16   3   14.10    2.00
  -4  16   3   17.10    2.70
   4  16  -3   19.40    2.40
   3 -16  -3  130.29    6.30
  -3 -16   3  139.49    6.30
   3  16  -3  120.49    6.40
   3  16  -3  153.58    6.30
  -3  16   3  147.19    5.60
  -3  16   3  144.29    6.40
   2 -16  -3   57.29    4.00
  -2 -16   3   59.89    3.70
   2  16  -3   59.89    3.40
  -2  16   3   58.99    2.80
   2  16  -3   55.89    2.90
  -2  16   3   47.70    3.50
   1 -16  -3    3.70    1.80
  -1 -16   3    2.60    1.60
  -1  16   3    2.70    1.00
  -1  16   3    2.20    1.50
   1  16  -3    1.60    1.00
   1  16  -3    4.50    1.50
   0 -16   3   59.89    4.00
   0 -16  -3   53.49    3.90
   0  16  -3   65.19    2.90
   0  16   3   72.29    2.80
   0  16   3   59.79    3.70
   0  16  -3   69.19    3.80
  -1 -16  -3    1.80    1.70
   1 -16   3    0.30    1.50
   1  16   3   -0.70    1.00
  -1  16  -3    0.90    1.10
   1  16   3    0.10    1.60
  -1  16  -3    2.50    1.50
   2 -16   3    0.60    1.70
   2 -16   3   -0.50    1.40
  -2 -16  -3   -0.70    1.70
  -2  16  -3    3.70    1.70
   2  16   3    0.70    1.80
   2  16   3    0.20    1.10
   3 -16   3  298.07   10.60
  -3 -16  -3  280.47   11.20
  -3 -16  -3  274.37   10.60
   3 -16   3  287.67   10.80
  -3  16  -3  276.47   10.90
   3  16   3  289.77   11.30
  -4 -16  -3    0.80    2.70
  -4 -16  -3    1.90    2.30
   4 -16   3    2.90    1.80
   4  16   3    4.50    2.60
  -4  16  -3    3.20    2.20
  -5 -16  -3   31.80    4.90
   5 -16   3   24.00    3.20
  -5  16  -3   24.10    3.50
   5  16   3   28.30    3.70
   6 -16   3   31.90    3.70
   6  16   3   43.20    4.90
  -6  16  -3   31.50    3.90
   7 -16   3   11.60    4.00
   7  16   3   18.20    4.50
  -7  16  -3   14.10    4.20
   8 -16   3    1.20    4.80
   8  16   3    0.00    5.50
  -8  16  -3    3.00    4.70
  -9  17   3   81.89    7.30
  -8 -17   3    1.80    3.70
   8 -17  -3    4.10    4.40
  -8  17   3    1.60    3.60
   7 -17  -3   90.19    6.70
  -7 -17   3  103.89    6.40
  -7  17   3  105.09    6.50
  -6 -17   3   47.10    4.50
   6 -17  -3   38.80    4.60
  -6  17   3   57.59    4.50
  -5 -17   3   14.20    2.80
  -5 -17   3   12.90    2.60
  -5  17   3   10.20    2.40
  -5  17   3   12.70    2.90
   4 -17  -3    1.10    2.00
  -4 -17   3    0.20    2.10
  -4  17   3    2.90    1.70
   4  17  -3    5.00    2.00
  -4  17   3    1.40    2.10
  -3 -17   3   77.19    4.70
   3 -17  -3   87.39    5.00
  -3  17   3   91.39    4.10
  -3  17   3   91.19    5.20
   3  17  -3   86.79    4.70
  -2 -17   3  181.88    7.70
   2 -17  -3  170.38    7.70
   2  17  -3  189.68    7.40
  -2  17   3  182.68    6.70
  -2  17   3  177.98    7.70
  -1 -17   3  335.87   12.50
   1 -17  -3  312.27   12.40
   1  17  -3  333.37   12.20
  -1  17   3  345.07   12.40
   0 -17   3   51.99    3.60
   0 -17  -3   58.39    4.20
   0  17   3   46.90    3.40
   0  17  -3   61.99    3.70
   0  17  -3   49.00    2.80
  -1 -17  -3    4.70    2.00
   1 -17   3    1.50    1.70
  -1  17  -3    3.80    1.30
  -1  17  -3    1.50    1.80
   1  17   3    2.20    1.60
  -2 -17  -3   78.89    4.80
   2 -17   3   85.69    4.00
   2 -17   3   71.69    4.30
  -2  17  -3   84.99    4.50
   2  17   3   91.19    4.90
   3 -17   3    3.80    1.70
  -3 -17  -3    1.30    2.30
   3 -17   3    3.70    1.80
  -3  17  -3    1.00    1.90
   3  17   3    4.20    2.10
  -4 -17  -3  237.18   10.10
   4 -17   3  251.37    9.80
  -4  17  -3  243.18   10.00
   4  17   3  246.18   10.20
   5 -17   3   24.40    3.30
  -5 -17  -3   22.50    3.20
   5  17   3   23.10    3.60
  -5  17  -3   33.20    3.90
   6 -17   3  133.69    7.50
  -6  17  -3  119.69    7.10
   6  17   3  137.59    8.20
   7 -17   3  144.49    8.80
  -7  17  -3  150.48    8.90
   7  17   3  147.99    9.00
   8 -17   3   18.10    4.80
   8  17   3   15.90    5.50
  -8  17  -3   12.70    4.40
   8 -18  -3   10.10    4.80
  -8 -18   3   12.40    4.60
  -8  18   3   15.90    4.70
  -7 -18   3  152.58    8.40
   7 -18  -3  148.39    8.40
  -7  18   3  149.19    7.60
   6 -18  -3    0.50    2.80
  -6 -18   3    1.10    3.00
  -6  18   3   -0.40    2.50
  -5 -18   3   75.79    4.90
   5  18  -3   75.89    5.00
  -5  18   3   87.79    4.80
  -5  18   3   84.89    5.90
   4 -18  -3   16.50    2.80
  -4 -18   3   13.70    2.80
  -4  18   3   15.90    3.00
  -4  18   3   16.10    2.30
   4  18  -3   13.80    2.70
   3 -18  -3   23.60    2.80
  -3 -18   3   17.40    2.60
  -3  18   3   18.30    2.70
   3  18  -3   21.40    2.60
  -2 -18   3    2.00    1.90
   2 -18  -3    1.90    2.00
  -2  18   3    3.60    1.90
   2  18  -3    3.50    1.70
   1 -18  -3   78.19    4.80
  -1 -18   3   91.29    4.80
   1  18  -3   88.69    4.50
  -1  18   3   80.79    4.50
   0 -18   3  195.38    8.40
   0 -18  -3  211.08    8.60
   0  18   3  195.78    8.30
   0  18  -3  210.18    8.10
   1 -18   3  203.48    8.40
  -1 -18  -3  205.28    8.50
  -1  18  -3  198.08    8.00
   1  18   3  193.38    8.20
  -2 -18  -3   11.30    2.50
   2 -18   3   11.60    2.20
   2 -18   3   13.40    1.90
   2  18   3   14.20    2.60
  -2  18  -3   12.50    2.30
   3 -18   3    0.70    2.00
   3 -18   3    0.70    1.80
  -3 -18  -3    1.60    2.50
  -3  18  -3    1.20    2.30
   3  18   3   -0.60    2.10
  -4 -18  -3   19.00    3.20
   4 -18   3   13.60    2.60
   4  18   3   13.60    3.00
  -4  18  -3   13.90    3.00
  -5 -18  -3   23.90    3.40
   5 -18   3   19.20    3.20
   5  18   3   25.20    4.00
  -5  18  -3   19.60    3.30
   6 -18   3   24.90    3.70
  -6  18  -3   16.90    3.60
   6  18   3   29.70    4.60
   7 -18   3    0.60    4.00
  -7  18  -3    1.40    4.00
   7  18   3   -0.80    4.50
   8 -18   3   26.70    5.30
   8  18   3   28.10    6.60
  -8 -19   3   29.50    4.90
   8 -19  -3   36.80    5.50
  -7 -19   3    3.20    3.60
   7 -19  -3    4.40    3.70
  -6 -19   3    0.60    3.00
   6 -19  -3    2.80    2.90
  -5 -19   3  275.07   10.80
   5  19  -3  255.67   10.60
  -5  19   3  253.97   11.10
   4 -19  -3   17.80    2.90
  -4 -19   3   19.40    2.90
   4  19  -3   22.80    3.00
  -4  19   3   18.40    3.10
  -3 -19   3  288.87   12.10
   3 -19  -3  322.57   12.20
  -3  19   3  304.57   12.10
   3  19  -3  318.77   11.80
  -2 -19   3  190.88    8.20
   2 -19  -3  190.28    8.30
   2  19  -3  185.08    7.80
  -2  19   3  195.28    8.10
   1 -19  -3  146.09    6.70
  -1 -19   3  136.69    6.50
  -1  19   3  138.09    6.60
   1  19  -3  140.69    6.20
   0 -19   3  109.59    5.90
   0 -19  -3  125.79    6.30
   0  19   3  115.69    5.60
   0  19  -3  111.59    5.40
  -1 -19  -3  703.73   25.60
   1 -19   3  696.03   25.40
   1  19   3  753.82   25.50
  -1  19  -3  753.32   25.20
   2 -19   3    3.40    2.20
  -2 -19  -3    4.00    2.40
   2  19   3    5.50    2.20
  -2  19  -3    3.70    2.00
   3 -19   3   27.60    3.10
   3 -19   3   19.80    2.90
  -3 -19  -3   17.80    3.00
  -3  19  -3   20.80    2.90
   3  19   3   19.70    2.90
   4 -19   3  302.17   11.30
  -4 -19  -3  278.07   11.70
  -4  19  -3  276.97   11.50
   4  19   3  301.17   11.90
   5 -19   3   33.80    3.70
  -5 -19  -3   33.40    4.00
   5  19   3   39.40    4.60
  -5  19  -3   36.30    4.00
   6 -19   3   18.10    3.60
   6  19   3   24.20    4.60
  -6  19  -3   18.10    4.10
   7 -19   3  148.89    9.10
   7  19   3  151.98   10.00
  -7  19  -3  150.28    8.70
   8 -19   3    9.80    5.40
   8  19   3   11.40    6.40
   8 -20  -3    1.90    4.20
  -8 -20   3   -1.40    4.70
  -7 -20   3   63.89    5.90
   7 -20  -3   52.49    5.60
   6 -20  -3   25.40    4.20
   6  20  -3   17.30    3.50
  -5 -20   3   53.79    4.60
   5  20  -3   65.39    4.80
  -5  20   3   58.69    5.60
  -4 -20   3   12.60    2.70
   4 -20  -3   12.50    3.00
   4  20  -3   11.60    2.80
  -4  20   3   16.90    3.00
   3 -20  -3   62.09    4.80
  -3 -20   3   46.10    4.20
  -3  20   3   58.59    4.70
   3  20  -3   53.19    3.90
  -2 -20   3   36.20    3.70
   2 -20  -3   38.30    3.90
   2  20  -3   31.20    3.20
  -2  20   3   40.20    4.00
   1 -20  -3   94.99    5.70
  -1 -20   3   93.69    5.20
   1  20  -3   86.49    4.70
  -1  20   3   93.99    5.10
   0 -20  -3    5.40    2.40
   0 -20   3    3.40    2.10
   0  20   3    6.00    2.30
   0  20  -3    5.10    2.00
   1 -20   3  150.68    7.20
  -1 -20  -3  144.39    7.20
  -1  20  -3  159.68    7.00
   1  20   3  151.88    6.90
   2 -20   3  122.19    6.30
  -2 -20  -3  134.09    6.80
  -2  20  -3  131.59    6.50
   2  20   3  142.69    6.50
   3 -20   3    0.50    2.30
  -3 -20  -3    1.00    2.70
   3  20   3   -0.10    2.20
  -3  20  -3    1.80    2.20
   4 -20   3   74.59    5.60
  -4 -20  -3   89.99    5.70
   4  20   3   87.89    6.10
  -4  20  -3   99.09    5.60
   5 -20   3   -0.70    2.70
  -5 -20  -3    3.40    3.20
  -5  20  -3    3.10    3.20
   5  20   3    2.40    3.40
   6 -20   3   12.20    3.60
  -6  20  -3   15.80    3.70
   6  20   3    8.30    4.20
   7 -20   3    9.80    4.50
  -7  20  -3   14.20    4.30
   7  20   3   13.40    4.80
  -8 -21   3   77.79    8.40
  -7 -21   3   43.50    5.00
   7 -21  -3   44.20    5.70
   6 -21  -3    5.10    3.30
   6  21  -3   10.90    3.40
  -5 -21   3  367.46   14.60
  -5  21   3  371.36   14.90
   5  21  -3  379.06   14.40
   4 -21  -3   78.29    5.50
  -4 -21   3   64.49    4.90
   4  21  -3   66.49    5.00
  -4  21   3   67.89    5.10
   3 -21  -3    5.50    2.60
  -3 -21   3    4.50    2.40
  -3  21   3    2.70    2.40
   3  21  -3    6.50    2.20
   2 -21  -3  169.98    7.80
  -2 -21   3  158.58    7.80
  -2  21   3  178.78    7.80
   2  21  -3  149.49    7.20
  -1 -21   3   76.49    5.00
   1 -21  -3   75.09    5.20
   1  21  -3   77.79    4.80
  -1  21   3   85.79    4.90
   0 -21   3   55.49    4.30
   0 -21  -3   67.69    4.80
   0  21  -3   54.59    3.90
   0  21   3   56.79    4.20
   1 -21   3  285.07   11.60
  -1 -21  -3  295.37   11.70
  -1  21  -3  282.57   11.20
   1  21   3  282.47   11.30
   2 -21   3  121.29    6.40
  -2 -21  -3  113.39    6.50
  -2  21  -3  108.69    5.80
   2  21   3  124.19    6.40
  -3 -21  -3  150.38    7.60
   3 -21   3  149.69    7.20
   3  21   3  160.98    7.50
  -3  21  -3  152.38    7.20
  -4 -21  -3  302.07   12.10
  -4  21  -3  259.97   11.50
   4  21   3  279.47   11.90
  -5 -21  -3    2.30    3.30
   5  21   3   -2.90    3.40
  -5  21  -3    0.00    2.90
   6  21   3  150.68    8.80
  -6  21  -3  153.48    8.90
  -7  21  -3    7.70    4.70
   7  21   3    5.20    4.60
  -8 -22   3   45.90    6.10
   7 -22  -3    0.30    4.00
   7  22  -3    2.30    4.20
   6  22  -3    0.20    3.10
  -5 -22   3    1.30    2.70
   5  22  -3    0.10    2.70
  -5  22   3   -1.30    2.80
   4 -22  -3   11.50    3.20
  -4 -22   3    7.40    3.10
  -4  22   3    4.90    2.90
   4  22  -3    7.30    3.00
   3 -22  -3    9.30    2.90
  -3 -22   3    7.30    2.70
  -3  22   3    9.00    3.00
   3  22  -3    9.50    2.70
  -2 -22   3   26.80    3.40
   2 -22  -3   27.00    3.50
   2  22  -3   25.80    2.90
  -2  22   3   28.10    3.40
   1 -22  -3    0.60    2.50
  -1 -22   3    1.30    2.20
   1  22  -3   -0.20    2.10
  -1  22   3   -1.10    2.30
   0 -22   3   16.80    2.90
   0 -22  -3    7.40    2.80
   0  22   3   15.30    2.80
   0  22  -3   10.70    2.40
  -1 -22  -3   10.20    3.00
   1 -22   3   11.90    2.90
   1  22   3    9.40    2.50
  -1  22  -3    6.70    2.30
   2 -22   3   20.90    3.20
  -2 -22  -3   26.10    3.80
   2  22   3   23.90    3.40
  -2  22  -3   23.40    3.00
  -3 -22  -3   25.00    3.90
   3 -22   3   23.30    3.40
   3  22   3   21.50    3.40
  -3  22  -3   30.50    3.70
  -4 -22  -3  107.69    7.30
   4  22   3  122.99    7.40
  -4  22  -3  126.59    7.00
  -5 -22  -3   65.69    5.70
   5  22   3   62.79    6.50
  -5  22  -3   74.69    5.70
  -6  22  -3   15.30    4.10
   6  22   3   21.90    4.60
  -7  22  -3    2.90    4.80
   7  22   3   -1.50    5.30
   7 -23  -3    3.10    4.40
   7  23  -3    7.70    4.30
   6  23  -3   96.89    6.70
  -5 -23   3   41.20    4.60
  -5  23   3   43.50    4.70
   5  23  -3   32.90    4.00
   4 -23  -3   68.49    5.70
  -4 -23   3   50.39    5.40
  -4  23   3   56.99    5.10
   4  23  -3   50.29    5.00
  -3 -23   3   60.79    5.10
   3  23  -3   67.79    5.10
  -3  23   3   65.19    5.00
   2 -23  -3  980.70   34.30
  -2 -23   3  969.50   34.20
   2  23  -3  972.30   33.60
  -2  23   3  990.10   34.10
  -1 -23   3   97.39    5.70
   1 -23  -3   88.19    5.90
  -1  23   3   98.09    5.80
   1  23  -3   80.69    5.00
   0 -23  -3  542.85   19.30
   0 -23   3  503.15   19.10
   0  23  -3  498.15   18.40
   0  23   3  509.55   18.70
  -1 -23  -3   10.10    3.10
   1 -23   3   12.90    3.20
   1  23   3    7.00    2.60
  -1  23  -3   13.70    2.90
   2 -23   3   61.19    5.30
  -2 -23  -3   62.19    5.40
   2  23   3   66.49    4.80
  -2  23  -3   60.49    5.00
  -3 -23  -3   44.20    5.10
   3 -23   3   49.90    5.10
   3  23   3   52.99    4.80
  -3  23  -3   48.60    4.50
  -4 -23  -3    1.70    3.50
  -4  23  -3    2.20    3.10
   4  23   3    1.40    3.30
  -5 -23  -3   28.00    4.40
   5  23   3   28.50    4.80
  -5  23  -3   28.30    4.20
  -6  23  -3  166.18    9.10
   6  23   3  155.38    9.30
   7  23   3   29.30    6.80
  -7  23  -3   30.80    5.20
   7 -24  -3   22.20    5.70
   7  24  -3   29.50    5.00
  -6  24   3    3.20    3.80
   6  24  -3    3.50    4.00
  -5 -24   3   54.19    5.80
   5  24  -3   43.00    4.70
  -5  24   3   39.10    4.70
   4 -24  -3   27.20    4.10
  -4 -24   3   32.00    4.30
  -4  24   3   28.80    4.20
   4  24  -3   29.40    3.40
  -3 -24   3   68.79    5.40
   3 -24  -3   68.09    6.00
   3  24  -3   55.49    4.70
  -3  24   3   70.59    5.70
  -2 -24   3  463.45   17.80
   2 -24  -3  464.55   17.90
  -2  24   3  465.95   17.70
   2  24  -3  483.35   17.30
  -1 -24   3   41.90    4.40
   1 -24  -3   47.30    4.60
  -1  24   3   32.30    3.60
   1  24  -3   36.50    3.70
   0 -24   3    2.80    2.50
   0 -24  -3    3.00    2.90
   0  24  -3    1.70    2.30
   0  24   3    3.10    2.60
   1 -24   3    0.50    2.50
  -1 -24  -3    4.30    2.90
   1  24   3    3.90    2.50
  -1  24  -3    2.80    2.70
  -2 -24  -3   49.00    5.20
   2 -24   3   56.39    5.30
   2  24   3   51.49    5.10
  -2  24  -3   52.99    5.00
  -3 -24  -3   69.09    6.30
   3 -24   3   59.89    5.50
   3  24   3   61.79    5.60
  -3  24  -3   59.69    5.50
  -4 -24  -3   84.79    6.90
  -4  24  -3   78.79    5.90
   4  24   3   93.99    6.70
  -5 -24  -3   76.49    7.00
  -5  24  -3   87.79    6.50
   5  24   3   80.09    7.40
   6  24   3   10.90    4.50
  -6  24  -3   14.40    4.40
   7  24   3   17.60    6.30
   7 -25  -3    8.10    5.40
   7  25  -3   16.10    5.30
   6  25  -3  169.08    9.60
  -5 -25   3   17.20    4.10
  -5  25   3   16.60    4.00
   5  25  -3   18.10    4.00
  -4 -25   3   -1.40    3.30
   4 -25  -3    2.70    3.50
   4  25  -3   -1.00    2.70
  -4  25   3    0.50    3.00
  -3 -25   3   19.40    3.60
   3 -25  -3   19.70    3.60
  -3  25   3   21.20    3.80
   3  25  -3   19.50    3.60
  -2 -25   3   50.79    5.60
   2 -25  -3   54.19    5.30
  -2  25   3   46.10    4.60
   2  25  -3   49.90    4.80
  -1 -25   3    2.40    2.70
   1 -25  -3    6.30    3.00
  -1  25   3    3.90    2.60
   1  25  -3    3.00    2.70
   0 -25   3   57.69    5.10
   0 -25  -3   69.89    6.00
   0  25   3   65.79    5.30
   0  25  -3   60.19    5.00
   1 -25   3   59.29    5.10
  -1 -25  -3   57.59    5.50
  -1  25  -3   55.69    5.00
   1  25   3   45.90    4.60
   2 -25   3  340.07   13.80
  -2 -25  -3  364.76   14.30
  -2  25  -3  337.77   13.50
   2  25   3  336.77   13.60
  -3 -25  -3   71.09    6.10
   3 -25   3   75.99    6.20
  -3  25  -3   80.19    5.60
   3  25   3   74.79    6.20
  -4 -25  -3   32.90    4.50
  -4  25  -3   26.10    4.00
   4  25   3   31.30    4.60
  -5 -25  -3   13.20    4.40
  -5  25  -3    5.60    3.70
   5  25   3    8.20    4.30
   6  25   3   84.89    8.70
  -6  25  -3   64.89    6.30
   7  26  -3  121.69    9.30
   6  26  -3   -3.00    4.30
  -5 -26   3    2.10    4.00
  -5  26   3    1.10    4.00
   5  26  -3   -1.00    3.60
  -4 -26   3   16.00    3.70
   4 -26  -3   16.80    3.70
   4  26  -3   13.40    3.70
  -4  26   3   17.70    4.20
   3 -26  -3  176.98    8.80
  -3 -26   3  169.98    8.70
   3  26  -3  159.38    8.20
  -3  26   3  160.78    8.70
  -2 -26   3   10.10    3.40
   2 -26  -3   15.70    3.90
  -2  26   3   10.60    3.40
   2  26  -3    9.20    2.90
  -1 -26   3   23.30    3.70
   1 -26  -3   24.20    4.00
  -1  26   3   23.70    3.50
   1  26  -3   20.80    3.50
   0 -26   3  108.79    6.60
   0 -26  -3  114.49    6.90
   0  26   3   92.89    6.40
   0  26  -3  102.09    6.20
  -1 -26  -3  145.59    8.10
   1 -26   3  143.39    7.70
  -1  26  -3  135.69    7.40
   1  26   3  149.59    7.50
  -2 -26  -3    0.10    3.50
   2 -26   3   -2.30    2.70
   2  26   3    3.70    3.20
  -2  26  -3   -2.60    2.90
   3 -26   3   59.49    6.00
  -3 -26  -3   63.59    6.00
  -3  26  -3   53.69    5.80
   3  26   3   52.39    5.90
  -4 -26  -3    3.70    3.60
  -4  26  -3    0.80    3.70
   4  26   3    0.10    3.70
  -5 -26  -3   65.59    7.50
   5  26   3   59.59    6.20
  -5  26  -3   72.09    7.20
   6  26   3  244.68   13.10
  -6  26  -3  234.68   11.70
  -5 -27   3   43.30    5.60
  -5  27   3   43.70    5.70
   5  27  -3   45.20    5.20
  -4 -27   3   -1.10    3.80
   4 -27  -3    6.50    3.90
   4  27  -3    1.70    3.60
  -4  27   3    4.90    3.50
   3 -27  -3  183.48    9.80
  -3 -27   3  165.78    9.20
   3  27  -3  187.48    8.90
  -3  27   3  192.38    9.50
   2 -27  -3    8.60    3.60
  -2 -27   3    7.50    3.70
  -2  27   3    6.30    3.00
   2  27  -3   10.20    3.00
   1 -27  -3  282.37   12.60
  -1 -27   3  308.37   12.60
  -1  27   3  289.37   12.30
   1  27  -3  285.47   11.70
   0 -27  -3   51.29    5.40
   0 -27   3   41.10    4.80
   0  27  -3   40.50    4.30
   0  27   3   41.60    4.50
   1 -27   3    5.40    3.10
  -1 -27  -3   10.90    3.70
   1  27   3    8.50    3.10
  -1  27  -3    8.90    3.40
  -2 -27  -3    4.30    3.70
   2 -27   3    3.10    3.40
   2  27   3    6.90    3.50
  -2  27  -3    7.80    3.10
  -3 -27  -3    6.00    3.80
   3 -27   3    4.90    3.20
  -3  27  -3    8.30    3.80
   3  27   3    9.80    3.40
  -4 -27  -3    4.50    3.90
  -4  27  -3    7.90    3.70
   4  27   3    1.80    3.50
  -5 -27  -3   78.69    7.30
   5  27   3   62.99    7.10
  -5  27  -3   80.19    7.70
  -6  27  -3    4.80    5.10
   6 -28  -3    6.10    4.60
  -5 -28   3   60.89    6.90
  -5  28   3   77.59    8.00
   4 -28  -3   74.29    7.10
  -4 -28   3   64.49    6.60
  -4  28   3   78.69    7.20
   4  28  -3   71.09    7.70
  -3 -28   3   12.90    4.00
   3 -28  -3    7.50    3.70
  -3  28   3    2.10    3.70
   3  28  -3    3.10    3.40
   2 -28  -3   30.20    4.50
  -2 -28   3   25.50    4.30
   2  28  -3   31.30    4.00
  -2  28   3   30.10    4.40
  -1 -28   3  232.48   10.70
   1 -28  -3  221.58   10.70
  -1  28   3  216.78   10.40
   1  28  -3  220.88   10.00
   0 -28  -3  118.59    7.50
   0 -28   3  110.09    7.10
   0  28  -3  108.79    6.80
   0  28   3  109.89    6.70
   1 -28   3    2.00    3.20
  -1 -28  -3    4.20    3.70
  -1  28  -3    0.70    3.30
   1  28   3    1.60    2.90
  -2 -28  -3   49.00    5.70
   2 -28   3   45.70    5.00
   2  28   3   41.10    4.50
  -2  28  -3   39.80    4.60
   3 -28   3    1.80    3.80
  -3 -28  -3    4.80    4.40
   3  28   3    4.20    3.80
  -3  28  -3    5.40    3.90
  -4 -28  -3   49.30    5.70
  -4  28  -3   46.90    5.60
  -5 -28  -3   22.80    5.20
  -5  28  -3   22.10    4.70
  -5 -29   3   31.70    5.80
  -5  29   3   31.80    5.40
  -4 -29   3   26.90    5.30
   4 -29  -3   41.60    5.60
  -4  29   3   39.80    5.60
   3 -29  -3   68.59    7.30
  -3 -29   3   63.29    6.40
  -3  29   3   73.09    6.80
  -2 -29   3  333.47   14.50
   2 -29  -3  358.96   15.00
  -2  29   3  326.57   13.90
   1 -29  -3    2.00    3.70
  -1 -29   3    2.00    3.50
  -1  29   3    0.40    3.50
   1  29  -3   -2.20    3.60
   0 -29   3   25.20    4.30
   0 -29  -3   29.80    4.70
   0  29   3   40.20    4.70
   0  29  -3   36.10    4.40
  -1 -29  -3    4.50    3.80
   1 -29   3    9.40    3.70
  -1  29  -3    0.80    3.00
   1  29   3    6.40    3.30
   2 -29   3   81.79    6.80
  -2 -29  -3   86.89    7.30
  -2  29  -3   87.19    6.70
   2  29   3   83.89    6.80
   3 -29   3   92.69    7.10
  -3 -29  -3   96.59    8.40
  -3  29  -3   84.79    7.30
  -4 -29  -3   11.90    4.70
  -4  29  -3   14.40    4.70
  -5 -29  -3   14.40    5.90
  -5  29  -3   13.70    5.20
  -5 -30   3    9.60    4.80
  -5  30   3    6.80    5.70
  -4 -30   3   22.10    5.00
   4 -30  -3   15.40    5.90
  -4  30   3   21.30    5.30
  -3 -30   3   66.39    6.90
   3 -30  -3   82.89    7.20
  -3  30   3   61.79    6.30
   2 -30  -3  150.08    9.00
  -2 -30   3  147.89    8.90
  -2  30   3  133.69    8.60
  -1 -30   3  123.09    8.20
   1 -30  -3  136.09    9.00
  -1  30   3  120.79    7.90
   0 -30   3   -2.40    3.60
   0 -30  -3   -2.90    3.60
   0  30   3    1.90    3.50
  -1 -30  -3   30.10    5.30
   1 -30   3   31.50    5.20
   2 -30   3   66.39    7.30
  -2 -30  -3   67.49    7.10
  -3 -30  -3   22.30    5.10
   3 -30   3   25.80    5.10
  -4 -30  -3   19.30    5.40
  -5  31   3    2.40    5.80
  -4 -31   3    5.10    5.20
  -4  31   3    5.00    5.30
  -3 -31   3    3.00    4.20
   3 -31  -3   -1.00    4.70
  -3  31   3    2.10    4.80
   2 -31  -3    3.30    4.70
  -2 -31   3    0.00    4.10
  -1 -31   3   10.80    4.90
   1 -31  -3   13.40    4.50
   0 -31  -3    3.80    4.20
   0 -31   3    1.20    4.00
  -1 -31  -3   10.00    4.60
   1 -31   3   15.10    4.80
  -2 -31  -3   19.00    4.90
   2 -31   3   23.40    5.20
   3 -31   3  100.49    8.60
  -3 -31  -3   94.49    8.60
  -4 -31  -3   -0.40    5.10
  -3 -32   3  194.18   11.30
   3 -32  -3  229.68   12.30
  -2 -32   3   29.50    5.90
   2 -32  -3   30.40    5.40
   1 -32  -3   39.60    5.70
  -1 -32   3   35.10    6.00
   0 -32   3   17.70    5.00
   0 -32  -3   10.10    4.80
  -1 -32  -3   46.90    6.20
   1 -32   3   56.29    6.30
  -2 -32  -3    1.90    5.10
   2 -32   3   -0.60    4.90
   3 -32   3    1.70    4.70
  -3 -32  -3    5.60    5.10
   3 -33  -3   25.70    5.80
   2 -33  -3   25.60    5.60
  -2 -33   3   21.10    6.70
   1 -33  -3   82.29    8.40
  -1 -33   3   80.69    8.90
   0 -33  -3    8.10    5.50
   0 -33   3    3.70    4.60
  -1 -33  -3   14.80    5.80
   1 -33   3   20.80    5.70
   2 -33   3   -3.50    5.30
   3 -33   3   -0.30    5.00
  10   0  -4  109.09    9.60
   9   0  -4   95.69    7.60
  -9   0   4   92.59    7.30
  -8   0   4   11.10    3.10
   8   0  -4    5.40    3.00
   7   0  -4    9.20    2.90
  -7   0   4    7.50    2.50
   6   0  -4  268.77   10.40
  -6   0   4  259.57   10.20
  -5   0   4   62.79    3.10
  -5   0   4   64.99    3.60
   5   0  -4   55.39    3.50
  -4   0   4  760.82   25.20
  -4   0   4  748.93   25.50
   4   0  -4  742.43   25.50
  -3   0   4 1796.52   59.59
  -3   0   4 1797.22   59.49
  -3   0   4 1803.42   59.49
  -2   0   4 2177.08   70.89
  -2   0   4 2157.68   70.79
  -2   0   4 2115.19   70.79
  -1   0   4   32.70    2.10
  -1   0   4   32.80    1.80
   1   0  -4   29.30    1.60
   0   0  -4   29.50    1.50
   0   0   4   23.20    1.80
   0   0   4   31.20    1.70
  -1   0  -4   50.09    2.30
   1   0   4   50.19    2.40
   1   0   4   50.59    2.50
  -2   0  -4   86.89    3.80
   2   0   4   88.89    4.00
   2   0   4   97.19    3.80
   3   0   4  583.04   19.40
   3   0   4  578.24   19.80
  -3   0  -4  553.94   19.60
  -4   0  -4  731.93   23.90
   4   0   4  727.33   24.80
  -4   0  -4  678.63   24.40
  -5   0  -4    0.70    1.90
   5   0   4   -0.40    2.00
  -6   0  -4  285.27   11.10
   6   0   4  276.47   11.50
  -7   0  -4   54.79    5.00
   7   0   4   44.20    5.20
   8   0   4    2.90    3.80
  -8   0  -4    8.80    3.30
   9   0   4   35.80    6.00
  -9   0  -4   36.80    5.60
  10  -1  -4    0.00    4.60
  10   1  -4    2.40    5.30
  -9  -1   4   15.10    3.90
   9  -1  -4   24.60    4.70
   9   1  -4   26.70    4.80
  -9   1   4   17.60    4.00
   8  -1  -4  204.98    9.50
  -8  -1   4  195.88    9.20
  -8   1   4  181.98    8.80
   8   1  -4  186.58    9.00
  -7  -1   4   25.60    3.20
   7  -1  -4   25.80    3.30
   7   1  -4   30.80    3.60
  -7   1   4   23.00    3.10
  -6  -1   4    0.50    2.00
   6  -1  -4   -0.80    1.80
   6   1  -4   -0.90    1.80
  -6   1   4   -1.60    1.70
  -5  -1   4   23.80    2.00
   5  -1  -4   21.20    2.50
  -5  -1   4   23.10    2.50
   5   1  -4   21.50    2.40
  -5   1   4   23.60    2.40
  -5   1   4   25.30    2.00
  -4  -1   4    4.80    1.10
   4  -1  -4    4.40    1.40
  -4  -1   4    5.20    1.30
  -4   1   4    6.30    1.20
   4   1  -4    5.60    1.40
  -4   1   4    2.80    1.20
  -3  -1   4  438.76   14.90
  -3  -1   4  436.66   15.00
  -3  -1   4  423.06   14.90
  -3   1   4  424.66   14.90
  -3   1   4  444.66   15.10
  -3   1   4  433.66   14.90
  -2  -1   4   57.79    2.90
  -2  -1   4   62.49    2.80
  -2  -1   4   69.09    2.80
  -2   1   4   61.89    2.70
  -2   1   4   60.09    2.80
  -2   1   4   61.99    2.90
   1  -1  -4  967.30   32.70
  -1  -1   4 1012.30   32.70
  -1  -1   4 1006.40   33.00
  -1   1   4  970.90   32.80
  -1   1   4  967.40   32.90
   1   1  -4 1005.70   32.80
   0  -1  -4 4575.14  150.38
   0  -1   4 4652.43  150.48
   0  -1   4 4487.05  150.28
   0   1  -4 4560.34  150.18
   0   1   4 4735.33  150.38
   0   1   4 4485.55  150.28
   1  -1   4  325.67   11.10
   1  -1   4  316.27   11.20
  -1  -1  -4  314.17   11.00
   1   1   4  319.27   11.20
   1   1   4  330.47   11.20
  -1   1  -4  324.07   11.10
  -2  -1  -4    0.30    0.90
   2  -1   4    0.90    1.00
   2  -1   4    0.00    0.80
  -2   1  -4   -0.40    1.00
   2   1   4    0.20    1.10
   2   1   4   -0.80    0.80
  -3  -1  -4   58.89    2.70
  -3  -1  -4   48.20    2.90
   3  -1   4   50.19    3.00
   3  -1   4   50.89    2.60
   3   1   4   56.59    3.20
  -3   1  -4   53.69    3.00
  -4  -1  -4  237.18    8.00
   4  -1   4  218.08    8.70
  -4  -1  -4  203.38    8.30
  -4   1  -4  203.78    8.40
   4   1   4  230.38    8.90
  -4   1  -4  223.68    7.90
  -5  -1  -4    7.20    1.90
   5  -1   4    6.90    2.20
  -5   1  -4    9.20    2.30
   5   1   4    6.70    2.20
  -6  -1  -4    1.80    2.10
   6  -1   4    0.20    2.50
   6   1   4   -2.60    2.40
  -6   1  -4    5.10    2.50
  -7  -1  -4    1.60    2.50
   7  -1   4    2.20    3.10
   7   1   4    1.20    3.40
  -7   1  -4    3.20    2.90
   8  -1   4  253.77   12.00
  -8  -1  -4  250.27   11.10
  -8   1  -4  260.57   11.50
   8   1   4  250.97   12.00
   9  -1   4   27.80    6.10
  -9  -1  -4   30.40    4.90
  -9   1  -4   21.80    4.80
   9   1   4   17.60    5.50
  10  -2  -4   74.39    7.80
  10   2  -4   60.39    7.10
   9  -2  -4    3.20    4.10
  -9  -2   4    2.70    3.40
  -9   2   4    2.50    3.50
   9   2  -4    2.60    3.90
   8  -2  -4   -1.40    2.80
  -8  -2   4    2.50    2.80
  -8   2   4    1.70    2.60
   8   2  -4   -0.90    2.80
  -7  -2   4   -0.80    2.20
   7  -2  -4    4.00    2.40
   7   2  -4    4.60    2.70
  -7   2   4    1.60    2.30
  -6  -2   4   20.60    2.60
   6  -2  -4   21.00    2.70
   6   2  -4   21.40    2.80
  -6   2   4   25.30    2.60
   5  -2  -4  102.09    4.20
  -5  -2   4   95.69    4.70
   5  -2  -4   92.59    4.90
  -5  -2   4  105.49    4.30
   5   2  -4   99.39    4.80
  -5   2   4  100.19    4.70
  -4  -2   4   21.50    2.10
  -4  -2   4   26.90    2.00
   4  -2  -4   18.50    2.00
  -4   2   4   22.50    2.00
   4   2  -4   19.30    2.10
  -4   2   4   22.10    1.80
  -3  -2   4   42.30    2.50
  -3  -2   4   43.90    2.40
   3   2  -4   36.90    2.30
  -3   2   4   44.20    2.40
  -3   2   4   46.30    2.50
  -3   2   4   49.20    2.70
  -2  -2   4 1198.48   39.50
  -2  -2   4 1212.98   39.40
  -2  -2   4 1166.08   39.50
  -2   2   4 1161.78   39.50
  -2   2   4 1195.58   39.50
  -2   2   4 1196.18   39.30
  -1  -2   4 1001.20   32.60
   1  -2  -4 1017.30   32.60
  -1  -2   4  956.00   32.90
  -1   2   4  993.70   32.80
   1   2  -4  989.50   32.80
  -1   2   4  960.20   32.90
   0  -2   4   83.49    3.20
   0  -2   4   78.69    3.40
   0  -2  -4   84.89    3.10
   0   2   4   83.29    3.50
   0   2   4   77.79    3.40
   0   2  -4   78.79    3.30
  -1  -2  -4  244.18    8.00
   1  -2   4  237.68    8.20
   1  -2   4  224.48    8.20
  -1   2  -4  233.68    8.20
   1   2   4  217.18    8.30
   1   2   4  226.28    8.30
   2  -2   4    2.20    1.10
  -2  -2  -4    0.40    0.90
   2  -2   4    0.40    0.90
  -2  -2  -4    0.20    0.90
  -2   2  -4    1.30    1.00
   2   2   4    1.30    1.30
  -3  -2  -4    4.40    1.20
   3  -2   4    5.10    1.10
   3  -2   4    6.30    1.60
  -3  -2  -4    5.40    1.20
   3   2   4    6.00    1.50
  -3   2  -4    5.90    1.50
   4  -2   4   45.60    2.30
  -4  -2  -4   43.50    2.40
  -4  -2  -4   36.30    2.70
   4  -2   4   41.60    3.10
  -4   2  -4   39.80    2.90
   4   2   4   42.30    3.20
  -5  -2  -4  193.68    8.30
   5  -2   4  210.28    8.80
  -5   2  -4  210.08    8.60
   5   2   4  218.08    8.90
  -6  -2  -4  103.59    5.50
   6  -2   4   92.79    6.10
   6   2   4  101.59    6.00
  -6   2  -4  104.69    5.50
  -7  -2  -4  221.08    9.70
   7  -2   4  208.18   10.00
  -7   2  -4  223.38    9.80
   7   2   4  218.28   10.50
   8  -2   4   22.80    4.60
  -8  -2  -4   32.60    4.50
   8   2   4   28.80    4.80
  -8   2  -4   24.70    4.00
   9  -2   4    1.10    4.70
  -9  -2  -4    7.70    4.20
   9   2   4    5.80    5.60
  -9   2  -4    2.80    4.60
  10   3  -4   35.50    6.30
   9  -3  -4    1.50    3.90
  -9  -3   4    3.40    3.50
  -9   3   4    2.30    3.40
   9   3  -4    2.60    3.50
  -8  -3   4   71.59    5.50
   8  -3  -4   86.49    5.90
  -8   3   4   70.09    5.30
   8   3  -4   82.49    6.20
  -7  -3   4   96.99    5.90
   7  -3  -4  101.79    5.80
  -7   3   4  103.69    5.90
   7   3  -4   99.09    5.70
   6  -3  -4  212.58    8.80
  -6  -3   4  211.18    8.80
   6   3  -4  207.78    8.80
  -6   3   4  215.78    8.60
   5  -3  -4  262.07    9.40
   5  -3  -4  254.37   10.00
  -5  -3   4  269.77    9.50
  -5  -3   4  265.57   10.00
   5   3  -4  256.77    9.90
  -5   3   4  272.27   10.00
  -4  -3   4  726.13   23.90
  -4  -3   4  725.63   24.20
   4  -3  -4  706.63   23.80
   4   3  -4  684.93   24.00
  -4   3   4  698.13   24.00
  -4   3   4  699.53   24.30
  -3  -3   4  983.20   33.30
  -3  -3   4  969.30   33.40
   3   3  -4 1017.20   33.30
  -3   3   4 1009.20   33.30
  -3   3   4 1014.10   33.30
  -3   3   4  995.40   33.50
  -2  -3   4 1490.75   48.40
  -2  -3   4 1457.45   48.60
  -2  -3   4 1447.46   48.60
  -2   3   4 1466.55   48.70
  -2   3   4 1447.26   48.60
  -2   3   4 1488.85   48.40
  -1  -3   4    3.10    1.00
  -1  -3   4    1.50    0.60
   1  -3  -4    1.40    0.60
  -1   3   4    2.90    1.00
   1   3  -4    2.40    0.90
  -1   3   4    2.00    0.90
   0  -3   4  153.08    5.40
   0  -3  -4  148.59    5.30
   0  -3   4  151.68    5.70
   0   3   4  148.69    5.80
   0   3  -4  155.38    5.70
   0   3   4  163.68    5.80
   1  -3   4  437.96   14.70
   1  -3   4  426.76   14.60
  -1  -3  -4  436.06   14.70
  -1  -3  -4  430.96   14.50
   1   3   4  425.96   14.80
  -1   3  -4  420.16   14.70
   2  -3   4    7.40    1.20
  -2  -3  -4   10.50    1.30
   2  -3   4    7.80    1.20
  -2  -3  -4    7.80    1.10
  -2   3  -4    6.30    1.30
   2   3   4   11.60    1.50
   3  -3   4    4.70    1.40
   3  -3   4    4.90    1.10
  -3  -3  -4    7.70    1.40
  -3  -3  -4    7.00    1.20
  -3   3  -4    6.40    1.40
   3   3   4    8.10    1.70
   4  -3   4  111.29    4.40
  -4  -3  -4  124.99    4.60
   4  -3   4  114.99    5.30
  -4  -3  -4  106.59    5.00
  -4   3  -4   98.19    5.00
   4   3   4  116.19    5.50
   5  -3   4  487.95   17.70
  -5  -3  -4  480.45   17.30
   5   3   4  471.85   17.80
  -5   3  -4  504.75   17.50
  -6  -3  -4    2.30    2.10
   6  -3   4    3.20    2.80
   6   3   4    0.10    2.50
  -6   3  -4    2.40    2.30
  -7  -3  -4  134.79    6.80
   7  -3   4  118.49    7.20
  -7   3  -4  130.39    7.20
   7   3   4  129.89    7.60
  -8  -3  -4    0.10    3.50
   8  -3   4    2.60    3.90
  -8   3  -4   -0.20    3.10
   8   3   4    1.00    4.30
  -9  -3  -4   26.00    4.80
   9  -3   4   27.30    5.70
   9   3   4   27.50    6.00
  -9   3  -4   27.20    5.00
  10   4  -4  126.19   10.20
   9  -4  -4   34.30    4.80
  -9  -4   4   33.90    5.00
   9   4  -4   36.30    5.20
  -9   4   4   40.60    5.10
   8  -4  -4   28.30    3.90
  -8  -4   4   17.10    3.40
  -8   4   4   21.80    3.50
   8   4  -4   33.30    4.30
   7  -4  -4   16.20    3.20
  -7  -4   4   17.30    2.90
   7   4  -4   19.80    3.20
  -7   4   4   18.40    2.90
  -6  -4   4   -1.90    1.80
   6  -4  -4    0.30    2.10
   6   4  -4    0.10    1.80
  -6   4   4   -3.30    1.70
  -5  -4   4    5.90    1.80
   5  -4  -4    5.00    1.70
   5  -4  -4    7.40    1.30
  -5  -4   4    7.60    1.40
   5   4  -4    6.20    1.70
  -5   4   4    7.00    1.80
   4  -4  -4   36.30    2.20
  -4  -4   4   38.10    2.50
  -4  -4   4   42.80    2.70
  -4   4   4   37.50    2.40
   4   4  -4   32.80    2.40
  -4   4   4   38.40    2.80
  -3  -4   4    8.20    1.30
   3  -4  -4    6.00    1.10
  -3  -4   4    8.10    1.30
  -3   4   4    7.80    1.20
   3   4  -4    7.20    1.10
  -3   4   4    7.70    1.40
  -2  -4   4  802.82   26.80
   2  -4  -4  751.12   26.70
  -2  -4   4  805.62   26.70
   2   4  -4  825.82   26.40
  -2   4   4  780.22   26.80
  -2   4   4  807.92   26.50
  -1  -4   4  179.18    6.10
  -1  -4   4  177.98    6.60
   1  -4  -4  182.98    6.20
   1  -4  -4  170.28    6.60
  -1   4   4  181.98    6.60
   1   4  -4  179.38    6.60
   0  -4   4   17.90    1.60
   0  -4  -4   20.20    1.70
   0  -4  -4   20.20    1.10
   0  -4   4   20.80    1.20
   0   4  -4   19.70    1.70
   0   4   4   20.90    1.70
   1  -4   4  603.04   20.20
  -1  -4  -4  602.74   20.20
  -1  -4  -4  603.34   19.90
   1  -4   4  596.94   20.00
   1   4   4  590.64   20.30
  -1   4  -4  577.64   20.20
   2  -4   4 1187.08   39.40
  -2  -4  -4 1188.68   39.50
  -2  -4  -4 1225.58   39.30
   2  -4   4 1199.98   39.50
  -2   4  -4 1148.49   39.60
   2   4   4 1166.38   39.70
   3  -4   4   -0.20    0.90
  -3  -4  -4    0.80    1.00
   3  -4   4    0.50    1.20
  -3  -4  -4    1.50    1.10
  -3   4  -4   -0.70    1.30
   3   4   4    0.80    1.50
  -4  -4  -4   11.50    1.50
  -4  -4  -4   11.10    1.80
   4  -4   4   15.50    2.10
   4  -4   4   10.20    1.30
  -4   4  -4   11.50    1.90
   4   4   4   13.60    2.10
  -5  -4  -4    4.30    2.00
   5  -4   4    0.60    2.10
   5   4   4    3.30    2.40
  -5   4  -4    0.20    2.00
  -6  -4  -4   58.09    4.40
   6  -4   4   49.60    5.00
   6   4   4   60.49    4.90
  -6   4  -4   55.39    4.30
  -7  -4  -4    0.90    2.50
   7  -4   4    0.80    3.20
  -7   4  -4   -0.30    2.50
   7   4   4    1.00    3.10
  -8  -4  -4    1.60    3.10
   8  -4   4    3.40    4.30
   8   4   4   -0.10    3.80
  -8   4  -4    3.00    3.30
   9  -4   4    3.40    4.90
  -9  -4  -4   -2.80    4.00
   9   4   4   -1.70    6.20
  -9   4  -4    3.40    4.20
  10   5  -4    4.80    5.40
  -9  -5   4   69.39    6.20
   9  -5  -4   66.29    7.20
   9   5  -4   58.89    6.20
  -9   5   4   51.29    5.50
  -8  -5   4   99.09    6.50
   8  -5  -4  115.69    7.20
   8   5  -4  122.69    7.20
  -8   5   4  102.69    6.70
  -7  -5   4   52.09    4.50
   7  -5  -4   61.39    5.20
   7   5  -4   65.09    4.70
  -7   5   4   62.09    4.50
  -6  -5   4  592.84   21.50
   6  -5  -4  622.74   21.80
  -6   5   4  618.94   21.40
   6   5  -4  604.04   21.60
  -5  -5   4    6.80    1.80
   5  -5  -4    8.40    1.50
  -5  -5   4    6.60    1.50
   5  -5  -4    6.90    1.90
   5   5  -4    7.60    1.80
  -5   5   4    8.10    1.70
  -4  -5   4   46.50    2.80
  -4  -5   4   46.50    2.60
   4  -5  -4   41.50    2.50
   4   5  -4   40.70    2.70
  -4   5   4   46.10    2.80
  -4   5   4   41.40    2.90
   3  -5  -4 1238.08   40.70
  -3  -5   4 1237.08   40.80
  -3  -5   4 1199.28   40.80
  -3   5   4 1212.78   40.60
   3   5  -4 1236.78   40.60
  -3   5   4 1209.28   41.00
   2  -5  -4    2.80    1.10
  -2  -5   4    2.60    1.10
   2   5  -4    3.80    0.70
   2   5  -4    2.30    1.00
  -2   5   4    3.20    1.10
  -2   5   4    5.70    0.90
  -1  -5   4 1077.39   33.80
  -1  -5   4  988.30   34.40
   1  -5  -4 1025.00   34.40
  -1   5   4 1012.40   34.40
   1   5  -4 1041.00   34.30
   0  -5  -4  797.42   25.20
   0  -5  -4  747.23   25.80
   0  -5   4  753.02   25.80
   0  -5   4  798.62   25.30
   0   5   4  739.33   25.80
   0   5  -4  753.02   25.70
   1  -5   4 1184.58   39.30
  -1  -5  -4 1199.78   39.30
  -1  -5  -4 1195.18   38.90
   1  -5   4 1162.68   39.00
  -1   5  -4 1153.28   39.30
   1   5   4 1178.88   39.40
  -2  -5  -4  588.34   19.90
   2  -5   4  591.44   19.80
  -2  -5  -4  600.74   19.70
   2  -5   4  602.04   19.90
  -2   5  -4  555.94   20.00
   2   5   4  566.24   20.10
   3  -5   4   30.80    2.00
   3  -5   4   38.30    2.50
  -3  -5  -4   34.20    2.30
  -3  -5  -4   37.00    2.30
  -3   5  -4   30.00    2.50
   3   5   4   36.10    3.00
  -4  -5  -4    2.70    1.30
   4  -5   4    0.40    1.50
  -4  -5  -4    3.30    1.30
   4  -5   4    1.20    1.10
  -4   5  -4    1.20    1.50
   4   5   4    2.30    1.70
   5  -5   4   68.69    4.50
  -5  -5  -4   73.29    4.30
   5   5   4   72.99    5.00
  -5   5  -4   76.19    4.40
   6  -5   4    9.20    3.00
  -6  -5  -4   16.40    2.60
   6   5   4   10.70    3.00
  -6   5  -4   12.90    2.60
  -7  -5  -4   20.00    3.40
   7  -5   4   11.70    3.40
   7   5   4   10.50    3.60
  -7   5  -4   20.80    3.30
  -8  -5  -4  144.39    8.20
   8  -5   4  154.78    8.70
   8   5   4  147.09    8.90
  -8   5  -4  130.69    7.90
  -9  -5  -4   26.10    4.90
   9  -5   4   22.10    5.40
  -9   5  -4   25.60    5.80
  10   6  -4   28.30    5.80
   9  -6  -4   -0.10    3.70
  -9  -6   4    1.20    3.60
   9   6  -4   -2.60    3.50
  -9   6   4    2.20    3.80
  -8  -6   4   11.30    3.20
   8  -6  -4   15.30    3.50
   8   6  -4   12.00    3.40
  -8   6   4   15.90    3.50
   7  -6  -4   12.10    2.90
  -7  -6   4   14.70    2.90
  -7   6   4    7.30    2.50
   7   6  -4   12.40    2.80
  -6  -6   4  295.37   11.90
   6  -6  -4  322.97   12.10
  -6   6   4  316.37   11.70
   6   6  -4  303.07   11.80
  -5  -6   4   -0.10    1.30
   5  -6  -4    1.50    1.70
  -5  -6   4    2.00    1.60
   5  -6  -4    1.50    1.30
  -5   6   4    1.30    1.60
   5   6  -4    2.90    1.60
   4  -6  -4   14.30    1.60
  -4  -6   4   18.00    2.00
  -4  -6   4   18.00    1.90
  -4   6   4   20.60    2.30
  -4   6   4   20.70    2.10
   4   6  -4   14.30    1.70
  -3  -6   4  122.49    4.90
   3  -6  -4  111.29    4.80
  -3  -6   4  119.99    4.90
  -3   6   4  124.79    4.70
  -3   6   4  118.19    5.10
   3   6  -4  115.49    4.70
  -2  -6   4 1107.69   36.20
   2  -6  -4 1045.00   36.20
  -2   6   4 1089.99   36.30
   2   6  -4 1121.49   35.70
   2   6  -4 1059.59   36.20
  -2   6   4 1070.59   35.80
   1  -6  -4   19.50    1.80
  -1  -6   4   30.50    2.00
   1   6  -4   26.00    1.90
   1   6  -4   27.50    1.00
  -1   6   4   27.50    2.00
  -1   6   4   28.10    1.30
   0  -6   4   15.90    1.60
   0  -6  -4   15.00    1.70
   0  -6   4   18.50    1.00
   0  -6  -4   15.00    0.80
   0   6  -4   13.20    1.40
   0   6   4   16.60    1.70
   1  -6   4  517.65   17.30
   1  -6   4  517.75   17.60
  -1  -6  -4  514.75   17.70
  -1  -6  -4  532.15   17.20
  -1   6  -4  496.95   17.70
   1   6   4  511.25   17.80
   2  -6   4    0.10    0.90
  -2  -6  -4    1.10    1.20
  -2  -6  -4    0.60    0.80
   2  -6   4    1.30    1.00
  -2   6  -4    0.80    1.30
   2   6   4    0.20    1.20
   3  -6   4   16.80    1.80
  -3  -6  -4   13.50    1.50
   3  -6   4   22.40    2.10
  -3  -6  -4   18.80    2.00
   3   6   4   15.30    2.00
  -3   6  -4   16.90    1.90
   4  -6   4    3.70    1.20
   4  -6   4    3.20    1.60
  -4  -6  -4    5.50    1.50
  -4  -6  -4    3.40    1.50
   4   6   4    2.00    1.80
  -4   6  -4    2.80    1.60
  -5  -6  -4    0.50    1.80
   5  -6   4    0.10    1.90
   5   6   4    0.00    2.30
  -5   6  -4    0.00    1.80
  -6  -6  -4  367.76   13.50
   6  -6   4  341.27   13.80
  -6   6  -4  349.27   13.50
   6   6   4  354.46   14.10
   7  -6   4    7.40    3.50
  -7  -6  -4    6.10    2.90
   7   6   4    3.30    3.20
  -7   6  -4    3.40    2.70
  -8  -6  -4    4.10    3.20
   8  -6   4    0.40    3.70
  -8   6  -4    2.10    3.40
   8   6   4   -2.70    3.90
   9  -6   4   -2.50    4.70
  -9  -6  -4    1.90    4.60
  10   7  -4   77.99    7.80
   9  -7  -4    0.00    3.70
  -9  -7   4   -1.00    4.00
   9   7  -4    0.50    3.50
  -9   7   4    2.10    3.50
  -8  -7   4   -2.70    2.70
   8  -7  -4    3.30    3.30
  -8   7   4    2.80    2.80
   8   7  -4    1.80    3.40
   7  -7  -4   20.80    3.20
  -7  -7   4   24.40    3.40
   7   7  -4   21.10    3.20
  -7   7   4   22.50    3.20
   6  -7  -4   17.30    2.70
  -6  -7   4   24.00    2.80
   6   7  -4   21.50    2.60
  -6   7   4   14.60    2.40
  -5  -7   4  187.48    7.00
  -5  -7   4  187.18    7.30
   5  -7  -4  171.28    6.80
  -5   7   4  181.08    7.60
   5   7  -4  161.88    7.10
  -5   7   4  169.08    7.00
  -4  -7   4  652.83   22.10
   4  -7  -4  654.53   22.00
  -4  -7   4  656.43   22.30
  -4   7   4  638.04   22.50
   4   7  -4  625.84   22.00
  -4   7   4  655.43   22.00
   3  -7  -4   33.40    2.40
  -3  -7   4   37.00    2.40
  -3  -7   4   35.80    2.40
  -3   7   4   36.80    2.60
  -3   7   4   37.10    2.10
   3   7  -4   33.80    2.00
   2  -7  -4  609.34   20.90
  -2  -7   4  634.94   20.90
   2   7  -4  602.44   20.80
  -2   7   4  591.34   20.90
  -2   7   4  609.54   20.40
   2   7  -4  619.34   20.30
  -1  -7   4  120.19    5.00
   1  -7  -4  117.89    4.90
  -1   7   4  129.69    5.10
  -1   7   4  123.19    4.20
   1   7  -4  121.69    4.90
   0  -7   4  519.95   18.20
   0  -7   4  552.74   17.50
   0  -7  -4  535.95   18.20
   0   7  -4  512.85   18.10
   0   7   4  519.65   18.20
   1  -7   4   17.30    1.70
   1  -7   4   20.70    1.50
  -1  -7  -4   18.50    1.20
  -1  -7  -4   21.90    2.00
  -1   7  -4   17.30    1.90
   1   7   4   21.30    2.20
   2  -7   4   66.49    3.10
  -2  -7  -4   65.39    2.80
  -2  -7  -4   70.69    3.50
   2  -7   4   60.09    3.00
  -2   7  -4   65.49    3.40
   2   7   4   67.09    3.50
   3  -7   4  985.20   32.30
  -3  -7  -4  982.40   32.50
  -3  -7  -4  944.51   32.30
   3  -7   4  954.50   32.50
  -3   7  -4  944.31   32.70
   3   7   4  984.00   32.90
  -4  -7  -4  258.27    9.90
   4  -7   4  255.17   10.10
   4  -7   4  270.17    9.70
  -4  -7  -4  293.27    9.90
   4   7   4  272.87   10.60
  -4   7  -4  263.07   10.20
   5  -7   4   63.09    4.40
  -5  -7  -4   61.39    3.80
   5   7   4   65.39    4.60
  -5   7  -4   54.59    4.00
   6  -7   4   35.90    4.10
  -6  -7  -4   39.30    4.00
   6   7   4   35.90    4.30
  -6   7  -4   40.20    4.00
  -7  -7  -4   17.50    3.20
   7  -7   4   23.30    4.00
  -7   7  -4   25.90    3.80
   7   7   4   24.00    4.40
   8  -7   4    5.30    4.00
  -8  -7  -4    7.20    3.70
  -8   7  -4    8.00    3.60
   8   7   4   12.40    4.60
   9  -7   4    8.20    5.00
  -9  -7  -4   10.50    5.00
  10   8  -4    1.40    5.70
   9  -8  -4   38.60    5.20
  -9  -8   4   37.30    5.20
  -9   8   4   29.70    4.50
   9   8  -4   29.00    5.00
   8  -8  -4    2.10    3.00
  -8  -8   4    1.20    2.90
  -8   8   4   -2.60    2.60
   8   8  -4   -2.90    3.20
  -7  -8   4   15.50    3.00
   7  -8  -4   21.70    3.30
  -7   8   4   20.40    3.00
   7   8  -4   26.60    3.30
   6  -8  -4    4.90    2.20
  -6  -8   4    7.50    2.20
  -6   8   4    5.80    2.20
   6   8  -4    7.70    2.40
   5  -8  -4    1.40    1.60
  -5  -8   4    1.50    1.40
  -5  -8   4   -0.80    1.80
   5   8  -4    2.90    1.70
  -5   8   4    1.20    1.50
  -5   8   4    2.50    2.00
  -4  -8   4   78.99    4.30
   4  -8  -4   88.59    4.10
  -4  -8   4  105.09    4.40
  -4   8   4   90.59    4.60
   4   8  -4   86.59    4.10
  -4   8   4   99.69    4.20
  -3  -8   4    5.50    1.30
   3  -8  -4    2.00    1.20
  -3  -8   4    1.20    1.30
  -3   8   4    2.50    1.40
  -3   8   4    2.30    1.00
   3   8  -4    1.00    0.90
   2  -8  -4   82.59    3.90
  -2  -8   4   82.99    3.80
   2   8  -4   77.89    3.70
  -2   8   4   76.69    3.80
   2   8  -4   83.09    3.10
  -2   8   4   83.29    3.20
  -1  -8   4   69.29    3.50
   1  -8  -4   69.29    3.50
  -1   8   4   73.59    3.60
  -1   8   4   80.29    2.70
   1   8  -4   74.29    3.50
   0  -8   4   34.60    1.30
   0  -8   4   30.50    2.20
   0  -8  -4   30.60    2.30
   0   8  -4   31.50    2.20
   0   8   4   33.40    2.40
   1  -8   4    6.20    0.90
   1  -8   4    7.20    1.40
  -1  -8  -4    6.30    0.70
  -1  -8  -4    7.60    1.40
  -1   8  -4    7.80    1.40
   1   8   4    7.80    1.50
   2  -8   4   32.70    2.10
  -2  -8  -4   30.30    1.80
   2  -8   4   28.40    2.10
  -2  -8  -4   27.70    2.30
  -2   8  -4   28.90    2.40
   2   8   4   30.70    2.50
  -3  -8  -4   13.80    1.60
  -3  -8  -4   14.00    1.80
   3  -8   4    9.70    1.50
   3  -8   4   13.40    1.80
  -3   8  -4   12.80    1.80
   3   8   4   14.50    2.00
  -4  -8  -4    2.00    1.60
  -4  -8  -4    1.80    1.40
   4  -8   4    1.00    1.40
   4  -8   4    1.00    1.60
  -4   8  -4    1.60    1.90
   4   8   4    0.70    1.70
  -5  -8  -4   34.60    3.30
   5  -8   4   33.90    3.40
  -5   8  -4   33.60    3.50
   5   8   4   34.50    3.80
   6  -8   4    0.10    2.70
  -6  -8  -4   -0.30    2.40
  -6   8  -4   -0.30    2.50
   6   8   4    0.60    2.70
   7  -8   4   41.80    4.50
  -7  -8  -4   42.30    4.20
   7   8   4   28.00    4.40
  -7   8  -4   46.00    4.30
   8  -8   4   14.00    4.30
  -8  -8  -4   16.30    4.10
   8   8   4   19.40    4.90
  -8   8  -4   12.70    4.00
  -9  -8  -4    5.70    4.40
   9  -8   4   15.80    8.30
  -9  -9   4   -3.00    3.70
   9  -9  -4    4.70    4.10
   9   9  -4    3.20    3.80
  -9   9   4    6.50    4.20
   8  -9  -4  139.39    7.70
  -8  -9   4  135.59    7.30
  -8   9   4  121.39    7.30
   8   9  -4  124.29    7.70
   7  -9  -4  245.88   11.10
  -7  -9   4  262.37   10.70
   7   9  -4  259.67   10.90
  -7   9   4  256.87   10.40
   6  -9  -4  261.07   10.90
  -6  -9   4  270.47   10.80
  -6   9   4  256.87   10.30
   6   9  -4  291.57   10.80
  -5  -9   4  494.45   17.90
  -5  -9   4  511.25   17.60
   5   9  -4  500.85   17.70
  -5   9   4  504.95   17.60
  -5   9   4  494.25   18.10
  -4  -9   4   20.40    2.00
  -4  -9   4   14.00    1.90
   4  -9  -4   12.70    1.80
  -4   9   4   16.70    1.80
   4   9  -4   14.00    1.70
  -4   9   4   17.20    2.20
  -3  -9   4  109.79    4.90
   3  -9  -4  114.09    4.90
  -3  -9   4  110.99    4.90
  -3   9   4  120.79    5.20
  -3   9   4  119.19    4.60
   3   9  -4  110.39    4.40
  -2  -9   4 1268.57   42.60
   2  -9  -4 1265.57   42.60
  -2   9   4 1277.37   42.70
   2   9  -4 1243.78   42.50
   2   9  -4 1278.87   41.90
  -2   9   4 1302.07   42.00
  -1  -9   4    6.40    1.30
   1  -9  -4    0.80    1.20
  -1   9   4    8.10    1.40
  -1   9   4    6.80    0.60
   1   9  -4    5.50    1.30
   0  -9   4  466.45   15.00
   0  -9   4  446.06   15.80
   0  -9  -4  449.16   15.90
   0   9  -4  459.25   15.80
   0   9   4  443.46   15.90
   1  -9   4  720.03   24.40
  -1  -9  -4  706.03   24.50
  -1  -9  -4  727.73   23.70
   1  -9   4  723.93   23.90
   1   9   4  724.83   24.60
  -1   9  -4  708.03   24.50
  -2  -9  -4 1080.99   35.80
   2  -9   4 1086.09   36.20
  -2  -9  -4 1085.29   36.40
   2  -9   4 1092.09   36.00
   2   9   4 1041.10   36.50
  -2   9  -4 1090.59   36.40
   3  -9   4 1237.28   41.00
   3  -9   4 1229.68   40.80
  -3  -9  -4 1258.37   41.10
  -3  -9  -4 1240.18   40.70
   3   9   4 1191.68   41.40
  -3   9  -4 1171.28   41.10
   4  -9   4   28.50    3.10
   4  -9   4   28.60    3.10
  -4  -9  -4   38.70    2.90
  -4  -9  -4   30.60    2.70
  -4   9  -4   40.80    3.20
   4   9   4   34.20    3.30
  -5  -9  -4   20.10    2.50
   5  -9   4   21.10    3.00
  -5   9  -4   21.50    2.90
   5   9   4   22.60    3.30
  -6  -9  -4  137.59    6.30
   6  -9   4  109.49    6.30
  -6   9  -4  111.59    6.20
   6   9   4  112.09    6.70
   7  -9   4    0.40    3.00
  -7  -9  -4   -2.70    2.90
   7   9   4   -2.30    3.20
  -7   9  -4    0.10    2.80
   8  -9   4   35.70    5.20
  -8  -9  -4   42.50    4.80
   8   9   4   37.20    5.70
  -8   9  -4   39.60    4.90
  -9  -9  -4    5.60    4.90
   9 -10  -4    2.50    4.10
  -9 -10   4   -0.50    3.90
   9  10  -4    0.80    4.90
  -9  10   4   -0.20    4.10
   8 -10  -4   65.29    5.80
  -8 -10   4   58.99    5.50
   8  10  -4   63.19    5.60
  -8  10   4   69.09    5.80
   7 -10  -4   90.59    5.70
  -7 -10   4   78.49    5.30
  -7  10   4   79.39    5.40
   7  10  -4   78.69    5.70
  -6 -10   4   14.40    2.60
   6 -10  -4   11.10    2.60
  -6  10   4   18.10    2.60
   6  10  -4   13.20    2.60
  -5 -10   4  315.97   11.60
  -5 -10   4  300.17   11.90
   5  10  -4  322.07   11.60
  -5  10   4  307.67   12.10
  -5  10   4  319.57   11.60
   4 -10  -4    1.90    1.40
  -4 -10   4    4.10    1.60
  -4 -10   4    3.60    1.60
  -4  10   4    3.50    1.30
  -4  10   4    2.70    1.60
   4  10  -4    1.00    1.30
   3 -10  -4  137.39    5.90
  -3 -10   4  142.99    6.00
  -3 -10   4  153.08    6.10
  -3  10   4  153.58    5.60
   3  10  -4  151.28    5.60
  -3  10   4  150.08    6.30
   2 -10  -4    2.10    1.30
  -2 -10   4    6.10    1.40
  -2  10   4    5.10    0.90
  -2  10   4    4.10    1.40
   2  10  -4    3.40    0.70
   2  10  -4    5.30    1.30
  -1 -10   4  133.29    5.30
   1 -10  -4  116.29    5.20
  -1  10   4  126.69    4.20
  -1  10   4  115.39    5.20
   1  10  -4  125.09    5.10
   0 -10   4   15.10    0.90
   0 -10   4   11.80    1.60
   0 -10  -4   15.30    1.80
   0  10  -4   14.00    1.70
   0  10   4   11.30    1.70
   1 -10   4 1227.18   40.40
  -1 -10  -4 1266.47   40.20
   1 -10   4 1221.38   40.90
  -1 -10  -4 1234.08   41.00
  -1  10  -4 1175.08   40.90
   1  10   4 1200.38   41.10
   2 -10   4   31.80    2.40
  -2 -10  -4   38.20    3.00
   2 -10   4   40.60    2.30
  -2 -10  -4   41.10    2.10
  -2  10  -4   39.80    2.80
   2  10   4   37.40    2.80
  -3 -10  -4  115.79    4.80
  -3 -10  -4  120.39    5.30
   3 -10   4  125.89    5.20
   3 -10   4  118.09    5.00
  -3  10  -4  123.89    5.40
   3  10   4  102.19    5.40
  -4 -10  -4  116.49    5.10
   4 -10   4  107.19    5.20
  -4 -10  -4  103.99    4.80
   4  10   4  114.39    5.60
  -4  10  -4   95.69    5.20
  -5 -10  -4   57.99    3.60
   5 -10   4   45.80    3.90
  -5  10  -4   51.39    4.10
   5  10   4   55.09    4.80
   6 -10   4    2.20    2.80
  -6 -10  -4    6.50    2.60
  -6  10  -4    2.90    2.40
   6  10   4    1.80    3.10
   7 -10   4   10.50    3.30
  -7 -10  -4   10.60    3.20
   7  10   4    8.80    4.10
  -7  10  -4    6.70    3.40
   8 -10   4   10.00    4.70
  -8 -10  -4   10.90    4.00
  -8  10  -4   12.20    4.30
   8  10   4   17.50    4.90
  -9 -10  -4    4.20    5.00
  -9 -11   4  181.78    9.80
   9 -11  -4  167.88   10.60
  -9  11   4  183.28    9.90
  -8 -11   4   15.60    3.60
   8 -11  -4   13.20    4.00
   8  11  -4   10.00    3.90
  -8  11   4    8.90    3.10
  -7 -11   4   56.49    4.70
   7 -11  -4   58.79    4.80
   7  11  -4   48.90    5.00
  -7  11   4   37.40    3.90
   6 -11  -4   -1.70    2.20
  -6 -11   4    0.20    2.20
  -6  11   4   -1.30    1.80
   6  11  -4   -1.40    2.30
  -5 -11   4    5.40    1.80
  -5 -11   4    0.00    2.10
   5  11  -4    4.00    1.90
  -5  11   4    3.30    2.00
  -5  11   4    6.30    1.90
   4 -11  -4   66.49    3.80
  -4 -11   4   81.39    4.10
  -4 -11   4   66.39    4.10
  -4  11   4   71.29    4.20
  -4  11   4   79.59    3.70
   4  11  -4   72.79    3.70
   3 -11  -4  133.19    5.80
  -3 -11   4  133.49    5.80
  -3  11   4  133.99    6.10
   3  11  -4  135.69    5.80
   3  11  -4  138.19    5.20
  -3  11   4  145.39    5.30
  -2 -11   4   57.79    3.40
   2 -11  -4   62.79    3.40
   2  11  -4   63.89    2.50
  -2  11   4   66.39    2.60
  -2  11   4   56.29    3.40
   2  11  -4   57.59    3.20
   1 -11  -4  504.65   17.90
  -1 -11   4  512.85   17.90
  -1  11   4  488.05   17.90
   1  11  -4  519.65   17.80
  -1  11   4  536.45   16.90
   0 -11  -4 1026.20   34.80
   0 -11   4  980.80   34.60
   0 -11   4 1069.79   33.80
   0  11  -4 1054.29   34.60
   0  11   4 1003.20   34.70
   1 -11   4  175.18    7.30
  -1 -11  -4  187.68    6.40
   1 -11   4  187.78    6.60
  -1 -11  -4  201.48    7.50
  -1  11  -4  184.08    7.30
   1  11   4  181.98    7.40
  -2 -11  -4  172.28    6.80
   2 -11   4  173.38    6.30
  -2 -11  -4  169.48    6.00
   2 -11   4  156.58    6.50
  -2  11  -4  170.88    6.90
   2  11   4  146.99    6.80
  -3 -11  -4   33.30    3.00
  -3 -11  -4   30.20    2.30
   3 -11   4   30.30    2.60
   3 -11   4   40.60    2.70
  -3  11  -4   39.60    3.30
   3  11   4   36.60    3.40
   4 -11   4   11.80    2.10
  -4 -11  -4   12.80    1.90
  -4 -11  -4   13.90    2.20
  -4  11  -4   11.40    2.30
   4  11   4    9.90    2.60
  -5 -11  -4   37.50    3.50
   5 -11   4   40.50    3.60
   5  11   4   37.10    4.10
  -5  11  -4   29.40    3.30
   6 -11   4   18.20    3.50
  -6 -11  -4   21.30    2.90
   6  11   4   16.80    3.50
  -6  11  -4   20.90    3.50
  -7 -11  -4   15.50    3.40
   7 -11   4   15.80    3.70
  -7  11  -4   14.80    3.50
   7  11   4   15.80    4.10
  -8 -11  -4    6.60    3.90
   8 -11   4    3.20    4.60
  -8  11  -4    4.10    3.80
   8  11   4    2.10    5.00
   9 -12  -4   94.59    8.10
  -9 -12   4  114.19    8.10
  -9  12   4  107.79    7.40
   8 -12  -4    0.10    3.20
  -8 -12   4   -1.00    3.50
  -8  12   4    0.60    3.20
  -7 -12   4    0.90    2.90
   7 -12  -4   -0.40    2.80
   7  12  -4    1.30    4.10
  -7  12   4    3.30    2.40
   6 -12  -4    2.60    2.40
  -6 -12   4   -1.70    2.10
  -6  12   4    1.10    2.20
   6  12  -4    0.00    2.40
  -5 -12   4   48.20    3.60
  -5 -12   4   51.49    4.10
   5  12  -4   50.49    3.60
  -5  12   4   47.70    3.40
  -5  12   4   50.09    4.00
  -4 -12   4    8.20    1.90
   4 -12  -4    6.00    1.80
  -4 -12   4    8.50    1.90
  -4  12   4    5.70    1.50
  -4  12   4    3.80    1.90
   4  12  -4    5.60    1.50
   3 -12  -4   28.30    2.80
  -3 -12   4   32.90    2.90
   3  12  -4   32.10    2.10
  -3  12   4   41.40    2.30
   3  12  -4   37.40    2.70
  -3  12   4   34.20    2.90
  -2 -12   4  151.48    6.40
   2 -12  -4  140.19    6.30
   2  12  -4  163.08    5.50
  -2  12   4  157.98    5.50
  -2  12   4  153.98    6.40
   2  12  -4  147.79    6.20
   1 -12  -4  326.77   12.00
  -1 -12   4  322.87   11.90
   1  12  -4  331.97   11.80
  -1  12   4  338.07   10.80
  -1  12   4  308.97   11.90
   0 -12  -4  255.97    9.80
   0 -12   4  253.37    9.60
   0 -12   4  264.67    8.70
   0  12   4  248.28    9.70
   0  12  -4  261.57    9.60
   1 -12   4  516.75   17.00
   1 -12   4  508.15   17.70
  -1 -12  -4  502.85   17.80
   1  12   4  465.05   17.70
   1  12   4  521.85   16.80
  -1  12  -4  506.45   17.70
  -2 -12  -4    4.90    1.00
   2 -12   4    5.80    1.30
   2 -12   4    5.20    1.50
  -2 -12  -4    7.50    1.70
   2  12   4    5.20    1.70
  -2  12  -4   10.50    2.00
  -3 -12  -4  176.68    7.30
  -3 -12  -4  174.98    6.70
   3 -12   4  191.18    7.00
   3 -12   4  171.68    7.00
  -3  12  -4  170.88    7.30
   3  12   4  175.98    7.60
  -4 -12  -4   11.90    1.90
  -4 -12  -4   19.00    2.50
   4 -12   4   15.90    2.30
   4  12   4   16.20    2.70
  -4  12  -4   12.70    2.40
   5 -12   4   20.80    3.00
  -5 -12  -4   22.10    2.60
  -5  12  -4   25.70    3.20
   5  12   4   25.10    3.40
  -6 -12  -4   61.49    4.70
   6 -12   4   49.99    5.20
  -6  12  -4   48.60    4.70
   6  12   4   64.29    5.40
  -7 -12  -4   16.70    3.50
   7 -12   4    9.90    3.50
   7  12   4   11.50    4.00
  -7  12  -4   10.50    3.60
   8 -12   4    5.50    4.20
  -8  12  -4    3.10    3.90
   8  12   4    4.40    5.20
  -9 -13   4   92.29    7.80
   9 -13  -4   96.79    8.00
  -9  13   4   90.99    7.80
   8 -13  -4    1.60    3.40
  -8 -13   4   -0.10    3.30
  -8  13   4    4.40    3.40
  -7 -13   4   63.49    5.10
   7 -13  -4   60.59    5.40
  -7  13   4   56.99    4.60
   6 -13  -4  103.69    6.30
  -6 -13   4  104.99    5.80
  -6  13   4  102.79    5.60
  -5 -13   4  295.37   11.20
  -5 -13   4  286.47   10.90
  -5  13   4  281.67   10.70
   5  13  -4  273.87   10.90
  -5  13   4  295.97   11.50
  -4 -13   4  688.53   23.30
  -4 -13   4  647.04   23.20
   4 -13  -4  656.63   23.10
   4  13  -4  674.13   22.80
  -4  13   4  647.64   23.50
  -4  13   4  684.93   22.80
   3 -13  -4  416.66   14.70
  -3 -13   4  400.26   14.60
  -3  13   4  415.56   14.00
  -3  13   4  395.16   14.80
   3  13  -4  405.26   13.90
   3  13  -4  397.76   14.50
  -2 -13   4   18.40    2.10
   2 -13  -4   16.90    2.10
  -2  13   4   19.50    1.50
   2  13  -4   16.50    1.40
  -2  13   4   17.90    2.10
   2  13  -4   17.90    2.00
   1 -13  -4  689.23   24.40
  -1 -13   4  698.63   24.40
  -1  13   4  741.03   23.30
   1  13  -4  712.93   24.30
  -1  13   4  687.13   24.40
   0 -13   4  409.46   15.50
   0 -13  -4  439.66   15.80
   0 -13   4  465.95   14.60
   0  13   4  426.06   15.60
   0  13  -4  441.86   15.50
   1 -13   4   11.00    1.80
   1 -13   4   20.90    1.60
  -1 -13  -4   16.10    2.30
   1  13   4   15.40    1.20
  -1  13  -4   20.80    2.10
   1  13   4   17.60    2.10
  -2 -13  -4  264.77   10.00
  -2 -13  -4  260.57    9.10
   2 -13   4  254.07    9.80
   2 -13   4  267.47    9.40
  -2  13  -4  254.77    9.90
   2  13   4  255.37   10.00
   3 -13   4    0.20    1.50
  -3 -13  -4    0.10    1.10
  -3 -13  -4    0.90    1.80
   3 -13   4    1.50    1.50
  -3  13  -4    2.10    1.80
   3  13   4    2.50    1.90
  -4 -13  -4  207.88    8.00
   4 -13   4  209.78    8.40
  -4 -13  -4  205.38    8.50
  -4  13  -4  209.68    8.70
   4  13   4  204.88    8.90
  -5 -13  -4  619.34   21.40
   5 -13   4  591.94   21.70
   5  13   4  623.54   22.30
  -5  13  -4  606.24   22.00
  -6 -13  -4    2.10    2.50
   6 -13   4    4.00    3.10
  -6  13  -4    3.50    2.70
   6  13   4    2.40    3.40
   7 -13   4   67.49    6.50
   7  13   4   71.99    6.70
  -7  13  -4   82.69    6.70
   8 -13   4    0.50    4.70
  -8  13  -4   -0.40    4.00
   8  13   4    1.10    4.70
  -9 -14   4    7.30    4.60
   9 -14  -4   13.30    5.50
  -9  14   4   10.50    4.70
  -8 -14   4    5.90    3.60
   8 -14  -4    1.70    3.60
  -8  14   4    3.60    3.40
   7 -14  -4  265.07   11.40
  -7 -14   4  233.48   10.80
  -7  14   4  234.48   10.30
  -6 -14   4   11.50    2.70
   6 -14  -4   12.00    3.00
  -6  14   4   14.50    2.60
  -5 -14   4   33.80    3.50
  -5 -14   4   34.70    3.60
  -5  14   4   39.40    3.30
  -5  14   4   35.60    3.90
   4 -14  -4  159.18    7.00
  -4 -14   4  163.68    7.10
   4  14  -4  174.68    7.20
  -4  14   4  163.18    6.50
  -4  14   4  160.28    7.30
   3 -14  -4   28.40    3.00
  -3 -14   4   26.90    2.70
  -3  14   4   26.50    2.20
   3  14  -4   25.70    2.70
  -3  14   4   21.10    2.60
  -2 -14   4   28.10    2.60
   2 -14  -4   20.00    2.40
   2  14  -4   24.90    2.70
  -2  14   4   28.60    1.70
  -2  14   4   23.30    2.60
   1 -14  -4  120.39    5.40
  -1 -14   4  112.19    5.20
  -1  14   4  105.99    5.20
   1  14  -4  117.59    5.10
   0 -14  -4  429.86   15.60
   0 -14   4  416.86   15.40
   0 -14   4  446.16   14.40
   0  14  -4  434.96   15.30
   0  14   4  423.16   15.50
   1 -14   4  279.87    9.30
  -1 -14  -4  260.87   10.30
   1 -14   4  257.97   10.10
   1  14   4  259.87   10.20
  -1  14  -4  271.17   10.10
  -2 -14  -4   48.90    3.60
   2 -14   4   51.79    3.50
   2 -14   4   56.89    3.00
   2  14   4   55.99    3.70
  -2  14  -4   55.49    3.60
   3 -14   4   10.80    1.90
  -3 -14  -4   13.10    2.20
   3 -14   4    8.10    1.80
   3  14   4    5.70    2.10
  -3  14  -4    7.70    2.20
  -4 -14  -4   29.50    3.10
   4 -14   4   27.80    3.20
  -4  14  -4   27.70    3.30
   4  14   4   22.00    3.20
   5 -14   4   14.60    2.90
   5  14   4   13.60    3.20
  -5  14  -4   13.00    2.90
   6 -14   4   27.20    3.80
   6  14   4   20.40    3.90
  -6  14  -4   22.80    3.60
   7 -14   4   24.80    4.50
   7  14   4   31.80    4.90
  -7  14  -4   23.20    4.10
   8 -14   4   82.79    7.50
  -8  14  -4   73.69    7.00
   8  14   4   76.79    8.30
  -9  15   4   21.10    4.90
   8 -15  -4   46.20    5.70
  -8 -15   4   52.09    5.20
  -8  15   4   49.80    5.10
  -7 -15   4  178.28    8.70
   7 -15  -4  179.98    9.20
  -7  15   4  188.48    8.30
  -6 -15   4    3.00    2.50
  -6  15   4    3.60    2.30
  -6  15   4    3.50    2.70
  -5 -15   4  130.49    6.40
  -5 -15   4  141.29    6.40
  -5  15   4  137.19    6.90
  -5  15   4  122.59    5.90
  -4 -15   4   15.70    2.30
   4 -15  -4   11.90    2.40
   4  15  -4   18.10    2.60
  -4  15   4   15.00    2.00
  -4  15   4   17.50    2.70
  -3 -15   4   54.29    4.00
   3 -15  -4   54.39    4.00
   3  15  -4   56.79    3.90
  -3  15   4   58.29    3.00
  -3  15   4   63.49    4.00
   2 -15  -4   57.49    3.80
  -2 -15   4   55.69    3.60
   2  15  -4   58.79    3.50
  -2  15   4   55.49    3.70
   1 -15  -4  293.37   11.70
  -1 -15   4  315.97   11.70
   1  15  -4  324.07   11.50
  -1  15   4  311.77   11.70
   0 -15   4  716.43   25.40
   0 -15  -4  717.73   25.50
   0  15  -4  758.32   25.30
   0  15   4  748.23   25.50
   1 -15   4   76.49    3.30
   1 -15   4   66.69    4.00
  -1 -15  -4   77.99    4.40
   1  15   4   70.29    4.10
  -1  15  -4   80.29    4.10
   2 -15   4   46.20    3.20
   2 -15   4   43.10    2.80
  -2 -15  -4   44.80    3.50
  -2  15  -4   44.60    3.40
   2  15   4   49.80    3.60
  -3 -15  -4  166.58    7.40
   3 -15   4  173.48    7.10
   3 -15   4  175.58    7.00
   3  15   4  165.58    7.60
  -3  15  -4  172.18    7.40
  -4 -15  -4  355.06   13.20
   4 -15   4  353.56   12.90
  -4  15  -4  359.56   13.40
   4  15   4  314.47   13.30
   5 -15   4   34.80    3.60
  -5  15  -4   41.90    4.30
   5  15   4   49.30    4.80
   6 -15   4    0.10    2.90
   6  15   4   -3.40    3.10
  -6  15  -4    2.80    2.90
   7 -15   4    0.90    3.90
   7  15   4    1.60    4.00
  -7  15  -4    0.20    3.50
   8 -15   4   51.59    6.30
   8  15   4   76.69    8.30
  -8  15  -4   55.39    6.30
  -8 -16   4   49.10    5.50
   8 -16  -4   25.80    4.70
  -8  16   4   40.90    4.40
   7 -16  -4    5.00    3.30
  -7 -16   4    9.90    3.60
  -7  16   4    9.20    3.30
  -6 -16   4   19.20    3.50
  -6  16   4   16.60    2.90
  -6  16   4   24.40    3.60
  -5 -16   4   73.09    5.00
  -5 -16   4   82.59    5.10
  -5  16   4   89.29    4.70
  -5  16   4   93.19    5.60
  -4 -16   4    0.90    1.80
   4 -16  -4   -0.60    2.00
  -4  16   4    1.00    2.10
  -4  16   4   -0.90    1.60
   4  16  -4    1.90    1.90
  -3 -16   4   -0.10    1.70
   3 -16  -4    0.30    1.80
   3  16  -4    0.30    1.70
  -3  16   4    0.30    1.90
  -2 -16   4  144.89    6.40
   2 -16  -4  136.69    6.50
  -2  16   4  144.49    6.50
   2  16  -4  149.59    6.30
  -1 -16   4    5.90    1.90
   1 -16  -4    5.40    2.00
   1  16  -4   11.70    1.90
  -1  16   4    7.30    1.90
   0 -16  -4   40.10    3.50
   0 -16   4   29.90    3.00
   0  16   4   34.40    3.10
   0  16  -4   44.50    3.10
  -1 -16  -4    8.50    2.10
   1 -16   4    2.70    1.70
  -1  16  -4    7.00    2.00
   1  16   4    8.10    2.00
   2 -16   4   14.20    2.30
  -2 -16  -4   11.30    2.30
   2 -16   4   12.30    1.70
  -2  16  -4   12.30    2.30
   2  16   4   11.30    2.30
  -3 -16  -4  153.28    7.30
   3 -16   4  169.78    6.60
   3 -16   4  138.09    6.60
  -3  16  -4  155.08    7.00
   3  16   4  159.28    7.20
   4 -16   4  272.97   10.50
  -4 -16  -4  265.87   10.90
  -4  16  -4  274.07   11.00
   4  16   4  265.37   11.10
   5 -16   4    0.10    2.50
   5  16   4    0.70    2.80
  -5  16  -4    0.10    2.60
   6 -16   4   10.50    3.40
   6  16   4    7.80    3.90
  -6  16  -4   14.80    3.80
   7 -16   4    1.10    3.40
  -7  16  -4    5.20    3.70
   7  16   4   -2.90    3.90
   8 -16   4   23.00    5.70
   8  16   4   23.30    6.60
   8 -17  -4   -1.40    4.00
  -8 -17   4   -1.40    3.80
  -7 -17   4    0.00    3.10
   7 -17  -4   -1.40    3.40
  -6 -17   4   69.89    5.20
  -6  17   4   70.79    5.50
  -5 -17   4   86.39    5.30
   5  17  -4   84.49    5.50
  -5  17   4   89.69    5.70
   4 -17  -4  414.16   14.90
  -4 -17   4  393.36   14.80
  -4  17   4  399.56   15.20
   4  17  -4  387.46   14.70
   3 -17  -4  224.38    9.20
  -3 -17   4  215.48    9.00
  -3  17   4  220.08    9.20
   3  17  -4  216.68    8.80
  -2 -17   4  119.99    5.80
   2 -17  -4  120.79    5.90
  -2  17   4  110.89    5.80
   2  17  -4  131.69    5.70
  -1 -17   4   26.40    3.00
   1 -17  -4   26.00    2.90
  -1  17   4   27.40    3.00
   1  17  -4   23.10    2.70
   0 -17  -4   16.50    2.50
   0 -17   4   14.60    2.30
   0  17   4   18.40    2.60
   0  17  -4   12.50    2.30
  -1 -17  -4  694.63   24.30
   1 -17   4  664.03   24.00
  -1  17  -4  720.43   24.00
   1  17   4  669.63   24.10
  -2 -17  -4    7.90    2.40
   2 -17   4   11.60    2.30
  -2  17  -4   13.70    2.60
   2  17   4   10.40    2.50
   3 -17   4  438.06   15.10
  -3 -17  -4  417.66   15.70
   3 -17   4  432.06   15.40
  -3  17  -4  403.86   15.50
   3  17   4  414.06   15.80
  -4 -17  -4   70.59    5.20
   4 -17   4   71.59    4.50
  -4  17  -4   71.09    4.90
   4  17   4   73.99    5.30
   5 -17   4   84.09    5.60
  -5  17  -4   93.19    5.90
   5  17   4   99.39    6.30
   6 -17   4  145.49    7.90
  -6  17  -4  131.99    7.70
   6  17   4  151.88    8.40
   7 -17   4   15.30    4.40
  -7  17  -4   13.90    4.00
   7  17   4   15.30    4.80
   8 -17   4    1.40    5.10
  -8 -18   4   37.40    5.10
   8 -18  -4   37.10    5.50
  -7 -18   4   14.80    4.10
   7 -18  -4   15.10    4.00
  -6 -18   4  177.48    8.70
  -6  18   4  199.38    9.30
  -5 -18   4    6.20    2.70
  -5  18   4    8.10    2.90
   5  18  -4    9.30    2.90
   4 -18  -4    1.80    2.40
  -4 -18   4   -1.10    2.00
  -4  18   4   -0.10    2.30
   4  18  -4   -1.80    2.00
  -3 -18   4   64.39    4.50
   3 -18  -4   84.49    5.10
   3  18  -4   74.29    4.70
  -3  18   4   76.69    4.80
  -2 -18   4  146.79    6.90
   2 -18  -4  147.29    7.00
   2  18  -4  156.08    6.80
  -2  18   4  156.78    7.20
   1 -18  -4  157.78    7.20
  -1 -18   4  157.48    7.10
   1  18  -4  156.38    6.70
  -1  18   4  147.79    6.80
   0 -18   4  268.67   10.70
   0 -18  -4  272.97   11.00
   0  18  -4  277.87   10.60
   0  18   4  278.27   10.80
   1 -18   4   39.10    3.40
  -1 -18  -4   30.40    3.30
   1  18   4   32.40    3.70
  -1  18  -4   36.40    3.70
   2 -18   4   35.90    3.40
  -2 -18  -4   44.60    4.30
   2  18   4   31.20    3.50
  -2  18  -4   31.20    3.20
  -3 -18  -4   40.00    4.10
   3 -18   4   36.30    3.80
  -3  18  -4   41.90    3.90
   3  18   4   45.40    4.20
  -4 -18  -4  112.19    6.80
   4  18   4  139.79    7.00
  -4  18  -4  120.09    6.50
   5 -18   4   40.60    4.50
   5  18   4   46.00    5.00
  -5  18  -4   50.69    4.80
   6 -18   4  334.47   14.00
  -6  18  -4  356.36   14.20
   6  18   4  350.06   14.70
   7 -18   4   91.29    8.00
   7  18   4  110.49    9.00
  -7  18  -4   88.39    7.20
   8 -19  -4    2.80    4.70
  -8 -19   4    1.00    4.60
  -7 -19   4  137.09    7.80
   7 -19  -4  123.49    8.70
   6  19  -4   62.99    5.70
  -6  19   4   56.49    5.40
  -5 -19   4  236.68    9.90
   5  19  -4  224.38    9.90
  -5  19   4  248.28   10.50
  -4 -19   4   15.00    3.00
   4 -19  -4   11.40    2.80
  -4  19   4   19.70    3.10
   4  19  -4   16.10    3.00
   3 -19  -4  267.57   10.70
  -3 -19   4  253.27   10.40
  -3  19   4  262.87   10.60
   3  19  -4  243.98   10.10
  -2 -19   4    9.40    2.40
   2 -19  -4   11.00    2.50
   2  19  -4    8.20    2.40
  -2  19   4    7.50    2.30
   1 -19  -4  137.19    6.90
  -1 -19   4  152.68    6.90
  -1  19   4  147.49    6.70
   1  19  -4  143.59    6.70
   0 -19   4    6.20    2.20
   0 -19  -4    6.10    2.40
   0  19   4    8.50    2.20
   0  19  -4    5.20    2.00
  -1 -19  -4   72.29    5.20
   1 -19   4   67.59    4.50
   1  19   4   71.89    4.80
  -1  19  -4   70.29    4.70
  -2 -19  -4  152.08    7.20
   2 -19   4  147.29    6.70
  -2  19  -4  134.39    6.70
   2  19   4  142.99    6.90
   3 -19   4   74.69    4.50
  -3 -19  -4   59.49    4.90
  -3  19  -4   68.49    4.70
   3  19   4   65.69    4.90
  -4 -19  -4   52.79    4.80
   4  19   4   55.99    5.10
  -4  19  -4   50.09    4.70
   5  19   4  123.79    7.80
  -5  19  -4  116.99    6.80
   6  19   4    2.20    4.10
  -6  19  -4   -0.10    3.20
   7  19   4    9.30    4.70
  -7  19  -4   16.40    4.80
  -8 -20   4   21.30    5.10
   8 -20  -4   26.10    5.40
   7 -20  -4   34.70    5.00
  -6  20   4    0.50    3.20
   6  20  -4    0.30    3.00
  -5 -20   4    3.60    2.60
  -5  20   4    3.50    3.20
   5  20  -4    0.70    2.60
   4 -20  -4   60.39    5.00
  -4 -20   4   48.50    4.90
  -4  20   4   58.69    4.80
   4  20  -4   53.99    4.30
  -3 -20   4    7.40    2.50
   3 -20  -4   14.80    2.90
  -3  20   4   11.60    3.00
   3  20  -4    8.80    2.60
   2 -20  -4  205.48    9.00
  -2 -20   4  196.28    8.80
   2  20  -4  208.38    8.70
  -2  20   4  214.58    8.90
  -1 -20   4   22.40    3.00
   1 -20  -4   24.90    3.30
   1  20  -4   19.40    2.70
  -1  20   4   26.30    3.00
   0 -20   4    4.10    2.20
   0 -20  -4    1.30    2.60
   0  20   4    1.60    2.30
   0  20  -4    2.50    2.20
   1 -20   4  160.48    7.40
  -1 -20  -4  149.49    7.70
   1  20   4  177.38    7.70
  -1  20  -4  158.38    7.40
   2 -20   4  619.54   21.70
  -2 -20  -4  601.34   21.90
  -2  20  -4  609.64   21.60
   2  20   4  588.14   21.70
  -3 -20  -4   -0.90    2.50
   3 -20   4    1.30    2.40
   3  20   4    0.20    2.80
  -3  20  -4    1.10    2.80
  -4 -20  -4  116.69    7.20
  -4  20  -4  110.99    6.90
   4  20   4  123.89    7.30
   5  20   4   31.50    4.60
  -5  20  -4   32.10    4.10
   6  20   4   29.60    5.20
  -6  20  -4   36.60    5.00
   7  20   4   -0.40    5.10
  -7  20  -4   -2.00    4.10
   7 -21  -4   20.90    4.70
   7  21  -4   22.50    4.50
  -6  21   4   14.60    3.90
   6  21  -4   15.70    3.90
  -5 -21   4    4.40    2.70
  -5  21   4    3.30    3.00
   5  21  -4    7.00    3.20
  -4 -21   4   76.69    5.40
   4 -21  -4   84.29    5.90
   4  21  -4   79.09    5.20
  -4  21   4   92.69    5.80
  -3 -21   4   17.00    3.30
   3 -21  -4   20.10    3.40
  -3  21   4   17.70    3.10
   3  21  -4   19.50    2.90
   2 -21  -4   25.30    3.70
  -2 -21   4   30.70    3.40
   2  21  -4   30.70    3.30
  -2  21   4   24.60    3.20
   1 -21  -4   -1.00    2.30
  -1 -21   4    4.50    2.50
   1  21  -4    3.90    2.40
  -1  21   4    2.50    2.50
   0 -21   4  306.37   12.40
   0 -21  -4  320.57   12.70
   0  21   4  302.97   12.30
   0  21  -4  332.97   12.30
   1 -21   4   19.50    3.10
  -1 -21  -4   18.90    3.20
  -1  21  -4   15.30    3.00
   1  21   4   20.30    3.20
   2 -21   4    5.80    2.40
  -2 -21  -4    5.80    2.90
   2  21   4   11.60    3.00
  -2  21  -4    1.10    2.30
  -3 -21  -4   37.20    4.10
   3 -21   4   36.30    3.80
   3  21   4   38.30    4.00
  -3  21  -4   38.40    4.10
  -4 -21  -4  146.79    7.70
  -4  21  -4  142.99    7.80
   4  21   4  141.89    8.10
  -5  21  -4   61.29    5.70
   5  21   4   70.29    6.10
  -6  21  -4   14.60    4.10
   6  21   4   11.20    4.40
   7  21   4   64.79    6.80
  -7  21  -4   41.80    6.10
   7 -22  -4   29.60    5.20
   7  22  -4   24.80    5.10
  -6  22   4   36.60    4.90
   6  22  -4   42.70    4.90
  -5 -22   4   89.89    6.50
   5  22  -4   89.39    5.90
  -5  22   4   92.79    6.50
   4 -22  -4   -0.40    2.60
  -4 -22   4   -0.50    2.80
   4  22  -4    5.20    2.90
  -4  22   4    2.00    2.80
  -3 -22   4   50.69    4.70
   3 -22  -4   58.49    4.90
  -3  22   4   49.50    4.60
   3  22  -4   44.00    4.70
  -2 -22   4  172.88    8.40
   2 -22  -4  177.08    8.50
  -2  22   4  182.78    8.60
   2  22  -4  187.98    8.10
  -1 -22   4   70.69    5.00
   1 -22  -4   66.09    5.20
   1  22  -4   73.99    4.60
  -1  22   4   75.09    5.30
   0 -22   4   36.10    4.10
   0 -22  -4   41.60    4.40
   0  22  -4   32.40    3.40
   0  22   4   38.80    4.40
  -1 -22  -4   63.09    5.80
   1 -22   4   77.09    5.10
   1  22   4   69.39    5.30
  -1  22  -4   59.49    4.60
  -2 -22  -4  100.89    6.50
   2 -22   4  120.39    6.50
  -2  22  -4   99.19    6.00
   2  22   4  116.49    6.30
  -3 -22  -4  144.89    8.10
   3 -22   4  140.49    7.30
   3  22   4  133.59    7.40
  -3  22  -4  153.98    7.30
  -4 -22  -4    8.30    3.70
   4  22   4    1.10    3.00
  -4  22  -4   -0.50    3.20
   5  22   4  348.07   14.20
  -5  22  -4  318.27   13.70
  -6  22  -4    4.80    3.90
   6  22   4    7.10    4.90
   7  22   4   29.00    6.90
   7 -23  -4    6.80    5.00
   7  23  -4    7.20    4.20
   6  23  -4   44.40    4.90
  -6  23   4   53.49    6.20
  -5 -23   4    0.80    3.30
   5  23  -4    1.60    2.90
  -5  23   4    3.90    3.30
  -4 -23   4  197.58    9.30
   4 -23  -4  199.68    9.30
   4  23  -4  187.98    8.90
  -4  23   4  214.68    9.60
   3 -23  -4   63.49    5.40
  -3 -23   4   59.69    5.10
  -3  23   4   79.79    5.80
   3  23  -4   61.19    5.20
  -2 -23   4  372.56   14.60
   2 -23  -4  367.26   14.70
  -2  23   4  384.66   14.70
   2  23  -4  362.76   14.20
   1 -23  -4   55.09    5.10
  -1 -23   4   58.69    4.80
   1  23  -4   48.20    4.30
  -1  23   4   59.99    4.70
   0 -23   4  144.29    7.40
   0 -23  -4  125.49    7.60
   0  23   4  138.39    6.90
   0  23  -4  130.69    6.70
   1 -23   4   24.90    3.40
  -1 -23  -4   19.20    3.90
   1  23   4   23.80    3.50
  -1  23  -4   24.00    3.30
   2 -23   4  165.98    7.90
  -2 -23  -4  167.18    8.40
   2  23   4  167.88    8.30
  -2  23  -4  148.49    7.90
   3 -23   4    4.30    2.70
  -3 -23  -4    5.10    3.20
  -3  23  -4    6.70    3.00
   3  23   4    6.10    3.30
  -4 -23  -4  161.08    8.50
  -4  23  -4  151.18    8.40
   4  23   4  155.18    8.30
   5  23   4    6.40    4.20
  -5  23  -4    0.50    3.80
   6  23   4    1.60    5.00
  -6  23  -4    1.90    4.00
   7 -24  -4   13.60    5.40
   7  24  -4   21.00    5.40
   6  24  -4    0.60    4.00
  -6  24   4   -1.20    3.80
  -5 -24   4   75.49    6.60
   5  24  -4   80.09    6.50
  -5  24   4   66.79    6.20
   4 -24  -4    2.40    3.00
  -4 -24   4    1.60    3.20
   4  24  -4    7.50    3.40
  -4  24   4    5.30    3.20
   3 -24  -4  182.08    9.10
  -3 -24   4  167.38    8.80
  -3  24   4  186.78    8.70
   3  24  -4  160.28    8.00
  -2 -24   4    6.30    2.90
   2 -24  -4    1.60    3.30
   2  24  -4    4.40    2.80
  -2  24   4    5.60    2.80
  -1 -24   4    0.30    2.60
   1 -24  -4    1.70    2.90
   1  24  -4   -1.50    2.60
  -1  24   4    1.80    2.60
   0 -24   4    9.40    3.20
   0 -24  -4    2.30    3.20
   0  24   4    6.70    2.70
   0  24  -4    3.50    2.60
   1 -24   4  124.59    7.00
  -1 -24  -4  140.09    8.00
  -1  24  -4  131.09    7.10
   1  24   4  131.79    7.00
  -2 -24  -4   64.39    5.70
   2 -24   4   54.99    5.40
  -2  24  -4   55.09    5.30
   2  24   4   61.59    5.60
   3 -24   4  122.39    7.20
  -3 -24  -4  111.59    7.30
  -3  24  -4  119.49    7.30
   3  24   4  131.79    7.20
  -4 -24  -4   13.70    4.30
   4  24   4   14.40    4.10
  -4  24  -4    7.20    3.40
  -5  24  -4   10.90    4.00
   5  24   4    9.40    4.50
   6  24   4  112.09    8.80
  -6  24  -4  118.59    8.90
   7  25  -4  121.59    8.60
   6  25  -4   90.39    7.10
  -6  25   4   90.69    7.70
  -5 -25   4   -2.60    3.30
   5  25  -4    0.80    3.40
  -5  25   4    2.20    4.10
   4 -25  -4   45.90    4.70
  -4 -25   4   36.10    4.70
   4  25  -4   47.60    4.90
  -4  25   4   35.90    4.50
  -3 -25   4    2.50    3.30
   3 -25  -4    3.60    3.60
  -3  25   4    3.60    3.00
   3  25  -4   -0.20    3.00
   2 -25  -4   -4.00    3.30
  -2 -25   4    1.30    2.90
   2  25  -4    1.70    3.00
  -2  25   4   -0.60    2.70
   1 -25  -4  157.38    8.20
  -1 -25   4  155.88    7.90
   1  25  -4  151.28    7.70
  -1  25   4  146.49    7.70
   0 -25   4   62.49    5.20
   0 -25  -4   53.79    6.00
   0  25   4   71.19    5.60
   0  25  -4   58.29    4.90
   1 -25   4    3.40    2.90
  -1 -25  -4    2.70    3.60
   1  25   4    1.60    2.70
  -1  25  -4    5.50    2.90
  -2 -25  -4   18.90    4.10
   2 -25   4   31.40    4.10
   2  25   4   28.70    3.80
  -2  25  -4   36.40    4.30
   3 -25   4    4.10    3.30
  -3 -25  -4    2.90    3.90
   3  25   4    6.70    3.70
  -3  25  -4    0.60    3.40
  -4 -25  -4   13.20    4.30
   4  25   4   17.20    4.30
  -4  25  -4   15.90    3.90
  -5  25  -4    6.00    4.30
   5  25   4   -0.20    3.90
   6  25   4   27.40    6.30
  -6  25  -4   21.50    5.50
   7  26  -4   -0.80    6.00
  -6  26   4   46.10    6.00
   6  26  -4   44.40    5.80
  -5 -26   4   -2.20    3.40
   5  26  -4   -3.70    3.80
  -5  26   4    1.70    3.80
  -4 -26   4    4.30    3.80
   4 -26  -4    9.70    3.70
  -4  26   4   10.60    3.70
   4  26  -4    9.50    3.80
  -3 -26   4   15.70    3.70
   3 -26  -4   27.60    4.50
   3  26  -4   19.80    3.80
  -3  26   4   19.50    3.80
   2 -26  -4  119.59    8.00
  -2 -26   4  127.99    7.50
   2  26  -4  130.69    7.30
  -2  26   4  128.49    7.60
   1 -26  -4   88.19    6.50
  -1 -26   4   84.49    6.10
  -1  26   4   85.69    6.40
   1  26  -4  100.09    6.20
   0 -26  -4    0.80    3.50
   0 -26   4   -0.70    2.80
   0  26  -4    2.20    2.70
   0  26   4    4.00    2.80
   1 -26   4   37.60    4.30
  -1 -26  -4   41.70    4.90
   1  26   4   35.80    4.10
  -1  26  -4   38.40    4.40
  -2 -26  -4  272.87   12.50
   2 -26   4  269.77   11.80
   2  26   4  254.47   11.50
  -2  26  -4  276.97   11.60
  -3 -26  -4    0.10    3.60
   3 -26   4   -0.40    3.30
   3  26   4    2.10    3.30
  -3  26  -4    0.90    3.30
  -4 -26  -4   32.30    5.00
  -4  26  -4   34.60    5.00
   4  26   4   27.70    4.60
   5  26   4    2.20    4.80
  -5  26  -4   -1.40    4.00
   6  26   4    6.00    5.90
  -6  26  -4    6.90    5.20
  -6  27   4    5.50    5.30
   6  27  -4    8.30    5.00
  -5 -27   4   12.50    4.20
   5  27  -4   15.30    5.20
  -5  27   4   16.10    5.00
   4 -27  -4   23.40    4.70
  -4 -27   4   19.10    4.10
  -4  27   4   27.90    5.00
   4  27  -4   24.60    4.10
  -3 -27   4   36.90    4.80
   3 -27  -4   57.99    6.00
  -3  27   4   40.80    4.70
   3  27  -4   47.50    4.90
   2 -27  -4   -3.90    3.60
  -2 -27   4    2.20    3.20
   2  27  -4    1.10    3.20
  -2  27   4   -0.40    2.90
   1 -27  -4  131.99    7.90
  -1 -27   4  123.29    7.50
   1  27  -4  130.79    7.40
  -1  27   4  127.39    7.70
   0 -27   4   85.89    6.20
   0 -27  -4   72.79    6.40
   0  27   4   84.79    6.30
   0  27  -4   75.99    5.60
  -1 -27  -4   49.00    5.30
   1 -27   4   41.10    4.60
  -1  27  -4   39.30    4.20
   1  27   4   37.20    4.60
   2 -27   4   23.60    4.00
  -2 -27  -4   20.90    4.40
  -2  27  -4   27.70    3.90
   2  27   4   24.50    4.40
   3 -27   4  122.39    8.00
  -3 -27  -4  145.79    9.30
  -3  27  -4  123.79    7.60
   3  27   4  134.59    8.30
  -4 -27  -4    1.50    4.60
   4  27   4    3.40    4.30
  -4  27  -4    2.00    3.80
   5  27   4   89.79    8.80
  -5  27  -4   76.79    8.30
   6  28  -4   50.89    5.90
  -6  28   4   45.00    7.90
  -5 -28   4    5.10    4.20
  -5  28   4   -0.60    4.20
   5  28  -4    3.40    4.40
  -4 -28   4   34.60    5.00
   4 -28  -4   37.10    5.30
  -4  28   4   43.20    5.60
   4  28  -4   33.10    5.00
  -3 -28   4   16.00    4.10
   3 -28  -4   18.10    4.30
   3  28  -4   15.80    3.60
  -3  28   4   11.50    4.10
   2 -28  -4   -0.20    3.50
  -2 -28   4    0.50    3.40
   2  28  -4    2.70    3.40
  -2  28   4    1.30    3.50
  -1 -28   4   28.20    4.30
   1 -28  -4   23.20    4.40
   1  28  -4   34.80    4.10
  -1  28   4   32.00    4.50
   0 -28  -4   47.80    5.30
   0 -28   4   55.49    6.30
   0  28   4   46.40    4.90
   0  28  -4   43.30    4.80
  -1 -28  -4    3.40    3.80
   1 -28   4    1.20    3.70
   1  28   4    8.40    3.70
  -1  28  -4    5.00    3.60
  -2 -28  -4   34.20    5.40
   2 -28   4   38.10    4.70
  -2  28  -4   31.20    4.30
   2  28   4   37.50    4.90
   3 -28   4    0.50    3.80
  -3 -28  -4    1.10    3.80
  -3  28  -4    3.80    3.60
   3  28   4    2.50    3.60
  -4 -28  -4   21.80    5.50
   4  28   4   21.50    4.80
  -4  28  -4   16.00    4.50
   5  28   4    0.40    4.90
  -5  28  -4    6.20    4.60
  -5 -29   4   25.50    5.20
  -5  29   4   20.60    5.90
   5  29  -4   24.10    5.50
   4 -29  -4   63.29    7.00
  -4 -29   4   71.99    7.10
   4  29  -4   74.49    6.40
  -4  29   4   68.29    6.70
  -3 -29   4   21.70    4.60
   3 -29  -4   19.90    4.90
  -3  29   4   28.20    5.00
   3  29  -4   22.40    4.40
  -2 -29   4    3.60    4.10
   2 -29  -4    0.60    3.70
  -2  29   4    4.60    3.40
   2  29  -4    1.20    3.50
  -1 -29   4   45.60    5.20
   1 -29  -4   43.50    5.40
  -1  29   4   42.50    5.10
   1  29  -4   47.60    4.90
   0 -29  -4   12.90    4.30
   0 -29   4    9.60    3.80
   0  29  -4   15.10    4.00
   0  29   4   11.10    3.90
   1 -29   4   49.50    5.30
  -1 -29  -4   39.30    5.40
  -1  29  -4   43.80    5.00
   1  29   4   42.30    5.10
  -2 -29  -4    1.20    4.20
   2 -29   4    6.70    4.10
  -2  29  -4    2.80    4.00
   2  29   4   -3.00    3.70
  -3 -29  -4    8.10    5.10
   3 -29   4    7.50    4.40
   3  29   4   10.20    4.50
  -3  29  -4    7.90    4.20
  -4 -29  -4    3.20    4.70
   4  29   4    6.80    5.10
  -4  29  -4    8.30    5.10
  -5  29  -4  182.08   11.00
  -5 -30   4    3.40    5.20
  -5  30   4    2.90    5.70
  -4 -30   4    4.00    4.50
   4 -30  -4   10.30    5.10
  -4  30   4   15.20    5.30
  -3 -30   4    8.10    4.20
   3 -30  -4    1.30    4.70
   3  30  -4    3.80    4.50
  -3  30   4    4.10    3.90
  -2 -30   4    1.30    3.90
   2 -30  -4    5.60    4.20
   2  30  -4   -2.60    3.70
  -2  30   4    0.80    3.40
  -1 -30   4   64.19    6.70
   1 -30  -4   54.39    6.40
   1  30  -4   59.49    5.80
  -1  30   4   71.49    6.90
   0 -30   4    7.00    3.90
   0 -30  -4    6.80    4.90
   0  30  -4    8.80    4.10
   0  30   4   10.80    4.10
   1 -30   4    6.10    4.40
  -1 -30  -4    5.80    4.40
   1  30   4   10.40    4.20
  -1  30  -4    8.70    4.10
   2 -30   4    2.40    3.90
  -2 -30  -4    1.80    4.30
   2  30   4    2.30    4.00
  -2  30  -4   -1.40    3.50
  -3 -30  -4   14.30    5.60
   3 -30   4   10.80    4.40
   3  30   4   14.80    5.10
  -3  30  -4   10.10    4.30
  -4 -30  -4    3.60    4.90
  -4  30  -4    3.60    5.10
  -4 -31   4   29.90    5.50
   4 -31  -4   30.30    6.60
  -4  31   4   32.60    6.10
   3 -31  -4   12.80    4.80
  -3 -31   4    8.60    4.70
  -3  31   4    9.80    4.80
  -2 -31   4    5.50    4.40
   2 -31  -4    5.50    5.00
  -2  31   4    1.80    4.20
  -1 -31   4   65.29    7.10
   1 -31  -4   81.69    7.80
  -1  31   4   91.79    7.40
   0 -31   4   80.99    8.10
   0 -31  -4   86.89    7.90
   0  31   4   83.19    7.50
   1 -31   4   39.30    5.40
  -1 -31  -4   40.80    6.40
  -1  31  -4   34.90    6.40
   1  31   4   29.90    5.00
  -2 -31  -4  110.89    8.70
   2 -31   4  106.39    8.80
  -2  31  -4   89.79    8.40
  -3 -31  -4    9.30    5.00
   3 -31   4    6.60    5.20
  -3  31  -4   11.00    5.80
  -4  32   4    5.10    5.90
   3 -32  -4   17.90    5.90
  -3 -32   4   17.00    6.10
  -3  32   4   10.20    5.30
   2 -32  -4   20.60    5.40
  -2 -32   4   21.40    5.60
  -2  32   4   28.20    5.40
   1 -32  -4   28.40    5.70
  -1 -32   4   31.70    5.50
  -1  32   4   27.40    4.90
   0 -32  -4    3.40    4.80
   0 -32   4    4.10    4.40
   1 -32   4    1.30    4.40
  -1 -32  -4   -1.40    4.60
  -2 -32  -4    9.40    5.60
   2 -32   4    9.60    4.70
   3 -33  -4   92.39    9.10
   2 -33  -4   42.30    6.90
  -1 -33   4   13.40    6.30
   1 -33  -4   10.90    5.30
   0 -33  -4    4.80    5.00
   0 -33   4   -1.60    4.70
   1 -33   4  126.69    9.50
   2 -33   4   59.89    6.80
  10   0  -5    1.30    5.20
   9   0  -5   -0.50    3.50
  -9   0   5    2.70    3.50
   8   0  -5    1.50    3.10
  -8   0   5    0.30    3.00
   7   0  -5   -0.20    2.30
  -7   0   5   -1.00    2.20
   6   0  -5   -1.30    2.00
  -6   0   5   -0.20    1.80
  -5   0   5   -0.40    1.50
   5   0  -5    0.70    1.40
  -5   0   5    0.40    1.30
  -4   0   5    0.20    1.20
   4   0  -5   -0.40    1.20
  -4   0   5    1.20    1.20
  -3   0   5   -0.60    1.00
  -3   0   5    0.70    1.10
  -3   0   5    0.80    1.10
  -2   0   5   -0.90    1.00
  -2   0   5    0.20    0.90
  -2   0   5    0.80    1.00
   1   0  -5    0.80    0.80
  -1   0   5    0.00    1.10
  -1   0   5    0.40    0.80
   0   0   5    0.40    0.90
   0   0   5    0.00    0.70
   0   0  -5    1.30    0.80
  -1   0  -5   -1.80    0.90
   1   0   5    0.20    1.00
   1   0   5    1.00    0.90
   2   0   5    0.60    1.20
   2   0   5   -0.60    0.90
  -2   0  -5    0.20    1.10
   3   0   5    1.00    1.30
   3   0   5   -0.30    1.10
  -3   0  -5    1.10    1.20
  -4   0  -5    0.50    1.60
   4   0   5    1.40    1.70
  -4   0  -5    1.30    1.30
  -5   0  -5   -0.80    1.80
   5   0   5   -0.60    2.30
  -6   0  -5    2.30    2.30
   6   0   5    0.30    2.90
  -7   0  -5    1.20    2.70
   7   0   5    0.30    3.50
   8   0   5    3.30    4.50
  -8   0  -5    2.30    3.30
  -9   0  -5    1.00    4.90
  10  -1  -5   68.79    7.40
  10   1  -5   87.59    9.10
   9  -1  -5    7.60    3.70
  -9  -1   5    8.50    4.10
  -9   1   5    9.50    3.80
   9   1  -5    6.40    3.60
   8  -1  -5  265.77   11.90
  -8  -1   5  272.87   11.50
   8   1  -5  294.67   11.70
  -8   1   5  267.77   11.50
  -7  -1   5   38.60    4.00
   7  -1  -5   35.70    4.00
   7   1  -5   37.80    4.40
  -7   1   5   38.20    3.90
  -6  -1   5   21.00    2.80
   6  -1  -5   15.90    2.50
   6   1  -5   16.20    2.50
  -6   1   5   16.00    2.40
  -5  -1   5 1062.29   35.40
   5  -1  -5 1021.70   35.80
  -5  -1   5 1070.89   35.80
  -5   1   5 1087.79   35.40
   5   1  -5 1039.60   35.80
  -5   1   5 1054.59   35.80
  -4  -1   5   27.20    2.20
  -4  -1   5   22.40    2.10
   4   1  -5   18.10    2.00
  -4   1   5   21.40    2.10
  -4   1   5   15.80    1.80
  -4   1   5   18.60    2.10
  -3  -1   5  953.40   32.30
  -3  -1   5  957.00   32.30
  -3  -1   5  971.20   32.30
  -3   1   5  973.30   32.30
  -3   1   5  958.00   32.40
  -3   1   5  967.00   32.20
  -2  -1   5 2067.69   68.69
  -2  -1   5 2076.89   68.59
  -2  -1   5 2116.19   68.89
  -2   1   5 2065.59   68.69
  -2   1   5 2113.69   68.59
  -2   1   5 2047.80   68.79
  -1  -1   5  259.07    9.20
  -1  -1   5  267.47    9.00
   1  -1  -5  256.57    8.90
  -1   1   5  246.68    9.20
   1   1  -5  244.88    9.00
  -1   1   5  258.47    9.10
   0  -1   5  414.16   13.90
   0  -1   5  397.76   14.10
   0  -1  -5  411.76   13.90
   0   1   5  407.96   14.00
   0   1  -5  408.36   14.00
   0   1   5  407.06   14.20
   1  -1   5  128.09    4.90
   1  -1   5  120.09    5.00
  -1  -1  -5  129.69    4.80
   1   1   5  126.89    5.00
  -1   1  -5  119.59    4.90
   1   1   5  122.09    5.00
   2  -1   5    1.70    1.10
  -2  -1  -5    1.10    1.10
   2  -1   5    2.40    1.30
  -2   1  -5    1.30    1.10
   2   1   5    2.70    1.40
   2   1   5    0.90    1.10
   3  -1   5  291.57   10.50
  -3  -1  -5  294.47   10.70
   3  -1   5  297.67   11.00
  -3  -1  -5  297.67   10.50
  -3   1  -5  285.67   10.70
   3   1   5  307.37   11.10
  -4  -1  -5  143.79    5.80
   4  -1   5  160.58    6.60
  -4  -1  -5  137.59    6.20
  -4   1  -5  150.18    5.70
   4   1   5  145.09    6.50
  -4   1  -5  143.89    6.20
  -5  -1  -5   32.00    3.20
   5  -1   5   33.10    3.70
  -5   1  -5   37.00    3.40
   5   1   5   38.70    3.80
  -6  -1  -5    9.20    2.50
   6  -1   5    5.50    3.10
  -6   1  -5    5.70    2.70
   6   1   5    2.70    2.70
  -7  -1  -5   44.50    4.30
   7  -1   5   44.50    4.80
   7   1   5   46.60    5.40
  -7   1  -5   36.30    4.10
  -8  -1  -5    7.70    3.50
   8  -1   5    1.00    4.00
   8   1   5    1.70    4.10
  -8   1  -5    2.00    3.70
  -9  -1  -5   56.09    6.60
  10  -2  -5    6.40    4.90
  10   2  -5    0.20    5.30
   9  -2  -5   48.70    5.30
  -9  -2   5   55.09    5.90
   9   2  -5   57.49    6.70
  -9   2   5   55.59    5.80
   8  -2  -5    9.80    3.20
  -8  -2   5    4.60    3.00
   8   2  -5    4.20    3.00
  -8   2   5    5.00    3.20
   7  -2  -5   16.60    3.30
  -7  -2   5   27.00    3.30
  -7   2   5   23.50    3.30
   7   2  -5   25.00    3.20
  -6  -2   5   41.00    3.50
   6  -2  -5   41.80    3.50
   6   2  -5   42.90    3.50
  -6   2   5   32.90    3.30
   5  -2  -5  158.58    7.00
  -5  -2   5  172.58    7.20
  -5  -2   5  172.48    6.70
   5   2  -5  160.48    6.90
  -5   2   5  179.28    7.00
  -5   2   5  184.78    6.70
  -4  -2   5  187.18    6.90
  -4  -2   5  174.08    7.00
   4   2  -5  176.18    7.00
  -4   2   5  183.58    7.00
  -4   2   5  178.48    6.90
  -4   2   5  184.18    7.20
  -3  -2   5  215.68    8.10
  -3  -2   5  218.28    7.90
  -3  -2   5  212.98    8.00
  -3   2   5  221.58    7.90
  -3   2   5  214.98    8.10
  -3   2   5  219.18    8.10
  -2  -2   5   37.20    2.00
  -2  -2   5   34.90    2.40
   2   2  -5   26.40    1.90
  -2   2   5   32.30    1.90
  -2   2   5   34.30    2.20
  -2   2   5   35.90    2.30
   1  -2  -5  697.53   22.70
  -1  -2   5  673.03   22.60
  -1  -2   5  662.63   23.00
  -1   2   5  692.33   22.90
  -1   2   5  675.83   23.00
   1   2  -5  669.73   22.80
   0  -2   5  707.13   22.90
   0  -2   5  688.93   23.20
   0  -2  -5  677.43   22.80
   0   2   5  681.63   23.20
   0   2   5  683.73   23.10
   0   2  -5  667.73   23.00
  -1  -2  -5    0.40    0.90
   1  -2   5   -0.80    0.90
   1  -2   5    1.00    0.90
  -1   2  -5    0.40    0.90
   1   2   5    0.30    1.10
   1   2   5    0.20    1.10
  -2  -2  -5   26.60    2.00
   2  -2   5   23.10    2.20
   2  -2   5   23.50    2.00
   2   2   5   22.70    2.10
   2   2   5   31.10    2.50
  -2   2  -5   24.70    2.00
   3  -2   5  193.58    7.40
  -3  -2  -5  184.08    7.10
   3  -2   5  189.88    7.00
  -3  -2  -5  196.98    7.20
   3   2   5  185.48    7.50
  -3   2  -5  175.68    7.20
   4  -2   5   77.39    3.70
  -4  -2  -5   77.79    4.20
  -4  -2  -5   83.89    3.80
   4  -2   5   81.69    4.30
   4   2   5   69.39    4.40
  -4   2  -5   78.29    4.20
   5  -2   5   34.40    3.60
  -5  -2  -5   37.00    3.50
  -5   2  -5   35.00    3.40
   5   2   5   38.20    4.20
  -6  -2  -5  118.09    6.50
   6  -2   5  117.49    7.10
  -6   2  -5  145.69    6.50
   6   2   5  119.89    6.90
   7  -2   5   -0.90    3.10
  -7  -2  -5    2.10    2.60
   7   2   5    0.90    3.20
  -7   2  -5   -0.50    2.60
   8  -2   5   35.40    5.70
  -8  -2  -5   35.70    4.70
  -8   2  -5   39.40    4.60
   8   2   5   27.20    5.40
  -9  -2  -5   14.30    5.20
  10   3  -5   75.99    7.70
  -9  -3   5   23.40    4.60
   9  -3  -5   20.10    4.40
  -9   3   5   15.60    4.00
   9   3  -5   25.90    4.30
  -8  -3   5   83.49    5.80
   8  -3  -5   87.89    6.00
  -8   3   5   76.19    5.60
   8   3  -5   91.39    6.00
   7  -3  -5  159.68    7.60
  -7  -3   5  155.68    7.50
  -7   3   5  152.48    7.30
   7   3  -5  161.98    7.70
   6  -3  -5  101.19    5.50
  -6  -3   5   97.19    5.10
  -6   3   5   89.79    4.90
   6   3  -5   95.99    5.00
  -5  -3   5  470.75   16.90
  -5  -3   5  471.55   16.50
   5  -3  -5  470.55   17.10
   5  -3  -5  488.55   16.50
  -5   3   5  477.55   16.80
   5   3  -5  477.55   16.90
  -4  -3   5   68.69    3.40
  -4  -3   5   58.29    3.40
  -4   3   5   65.69    3.30
  -4   3   5   67.09    3.40
  -4   3   5   67.79    3.60
   4   3  -5   60.69    3.30
  -3  -3   5   40.50    2.60
  -3  -3   5   43.30    2.50
  -3   3   5   37.50    2.50
  -3   3   5   35.00    2.10
  -3   3   5   35.20    2.60
   3   3  -5   36.20    2.10
  -2  -3   5 1607.64   53.69
  -2  -3   5 1641.24   53.29
  -2   3   5 1602.14   53.69
  -2   3   5 1609.64   53.59
  -2   3   5 1627.04   53.29
   2   3  -5 1605.44   53.49
   1  -3  -5  170.68    5.90
  -1  -3   5  167.08    5.80
  -1  -3   5  156.58    6.30
  -1   3   5  162.18    6.20
  -1   3   5  167.38    6.30
   1   3  -5  159.48    6.20
   0  -3  -5    3.40    0.80
   0  -3   5    4.80    0.80
   0  -3   5    3.80    1.10
   0   3  -5    4.70    1.10
   0   3   5    6.50    1.10
   0   3   5    4.90    1.20
   1  -3   5 3982.80  128.39
   1  -3   5 3826.02  128.59
  -1  -3  -5 3962.50  128.29
  -1   3  -5 3929.81  128.59
   1   3   5 3893.91  128.69
   1   3   5 3869.81  128.59
  -2  -3  -5  167.08    6.30
  -2  -3  -5  164.48    6.10
   2  -3   5  160.68    6.20
   2  -3   5  162.38    6.30
  -2   3  -5  153.58    6.30
   2   3   5  167.38    6.50
  -3  -3  -5    7.20    1.50
  -3  -3  -5    7.10    1.40
   3  -3   5    4.50    1.30
   3  -3   5    6.30    1.60
  -3   3  -5    7.40    1.50
   3   3   5    7.50    1.70
   4  -3   5  215.78    8.20
  -4  -3  -5  217.08    8.60
   4  -3   5  228.58    9.00
  -4  -3  -5  232.98    8.40
  -4   3  -5  227.38    8.80
   4   3   5  232.18    9.20
  -5  -3  -5   37.20    3.30
   5  -3   5   42.40    4.20
  -5   3  -5   38.00    3.80
   5   3   5   37.70    3.90
  -6  -3  -5   24.40    3.10
   6  -3   5   19.00    3.30
  -6   3  -5   26.70    3.20
   6   3   5   21.40    3.60
   7  -3   5   62.29    6.40
  -7  -3  -5   76.99    5.60
   7   3   5   67.49    6.10
  -7   3  -5   65.19    5.20
  -8  -3  -5   -0.20    3.70
   8  -3   5    0.60    3.90
  -8   3  -5    2.90    3.40
   8   3   5    0.30    4.10
  -9  -3  -5   51.39    6.30
  10   4  -5   14.40    5.80
   9  -4  -5   68.69    7.30
  -9  -4   5   62.29    6.20
   9   4  -5   74.99    7.10
  -9   4   5   60.29    6.10
  -8  -4   5   65.69    5.40
   8  -4  -5   58.39    5.30
   8   4  -5   58.29    5.20
  -8   4   5   55.09    5.00
   7  -4  -5   77.49    5.30
  -7  -4   5   81.09    5.30
   7   4  -5   83.19    5.20
  -7   4   5   84.39    5.10
   6  -4  -5   95.79    5.40
  -6  -4   5  107.09    5.40
  -6   4   5  100.59    5.10
   6   4  -5  105.79    5.50
   5  -4  -5  163.38    7.00
  -5  -4   5  165.88    6.90
   5  -4  -5  168.38    6.50
  -5  -4   5  165.38    6.50
   5   4  -5  154.28    6.70
  -5   4   5  169.78    6.70
  -4  -4   5  118.79    5.10
   4  -4  -5  118.09    4.90
  -4  -4   5  123.09    5.20
  -4   4   5  118.69    5.30
  -4   4   5  123.59    5.10
   4   4  -5  117.79    5.00
  -3  -4   5 1096.69   37.00
  -3  -4   5 1107.59   36.90
  -3   4   5 1087.99   36.70
   3   4  -5 1104.29   36.70
  -3   4   5 1114.09   36.90
  -3   4   5 1102.59   37.10
  -2  -4   5  431.36   15.10
  -2  -4   5  444.36   14.70
  -2   4   5  427.36   15.10
  -2   4   5  450.55   14.70
  -2   4   5  427.06   15.10
   2   4  -5  422.96   15.00
   1  -4  -5  220.98    7.70
  -1  -4   5  212.78    8.20
  -1  -4   5  228.38    7.70
  -1   4   5  224.68    8.30
  -1   4   5  225.78    8.20
   1   4  -5  222.78    8.10
   0  -4   5    1.00    0.70
   0  -4  -5    0.00    1.00
   0  -4  -5   -0.20    0.60
   0  -4   5    0.50    1.10
   0   4  -5    2.90    1.00
   0   4   5   -1.00    1.00
  -1  -4  -5  424.96   14.50
   1  -4   5  408.36   14.40
   1  -4   5  418.06   14.20
  -1  -4  -5  403.26   14.00
  -1   4  -5  408.36   14.40
   1   4   5  420.76   14.60
  -2  -4  -5   35.30    2.30
   2  -4   5   35.20    2.40
  -2  -4  -5   31.90    2.10
   2  -4   5   34.00    2.30
   2   4   5   32.40    2.50
  -2   4  -5   35.30    2.40
  -3  -4  -5   95.39    4.20
   3  -4   5   95.39    4.40
  -3  -4  -5  103.89    4.30
   3  -4   5   89.29    4.10
  -3   4  -5   88.29    4.40
   3   4   5  102.59    4.70
   4  -4   5    5.60    1.50
  -4  -4  -5    6.90    1.60
   4  -4   5    5.40    2.00
  -4  -4  -5    6.40    1.60
   4   4   5    5.70    2.10
  -4   4  -5    7.60    1.90
  -5  -4  -5    2.60    1.80
   5  -4   5    2.40    2.10
  -5   4  -5    1.60    1.90
   5   4   5    3.00    2.20
  -6  -4  -5  159.78    7.40
   6  -4   5  179.38    8.20
   6   4   5  163.28    8.30
  -6   4  -5  168.18    7.70
   7  -4   5    7.40    3.40
  -7  -4  -5   12.20    3.00
   7   4   5   12.60    3.90
  -7   4  -5   16.20    3.50
   8  -4   5    2.70    4.10
  -8  -4  -5    3.30    3.40
  -8   4  -5    2.40    3.80
   8   4   5    5.30    4.90
  -9  -4  -5   75.99    7.00
  10   5  -5   -1.80    4.90
   9  -5  -5   21.70    4.50
  -9  -5   5   34.60    5.10
  -9   5   5   25.20    4.50
   9   5  -5   26.00    4.40
   8  -5  -5    6.10    3.50
  -8  -5   5    7.70    3.20
  -8   5   5    9.10    3.00
   8   5  -5   10.60    3.20
   7  -5  -5   55.79    4.50
  -7  -5   5   39.80    4.30
  -7   5   5   51.99    4.20
   7   5  -5   54.89    4.70
   6  -5  -5   16.00    2.60
  -6  -5   5   13.70    2.50
   6   5  -5   15.00    2.40
  -6   5   5   10.70    2.20
   5  -5  -5   32.00    2.50
  -5  -5   5   32.60    2.60
  -5  -5   5   40.00    3.30
   5   5  -5   31.60    2.90
  -5   5   5   36.20    3.20
  -5   5   5   35.30    3.00
  -4  -5   5  939.91   32.50
   4  -5  -5  968.00   32.30
  -4  -5   5  972.00   32.30
   4   5  -5  963.20   32.20
  -4   5   5  980.10   32.30
  -4   5   5  926.61   32.60
  -3  -5   5  377.66   13.30
  -3  -5   5  356.66   13.20
   3  -5  -5  378.76   13.10
  -3   5   5  388.96   12.90
   3   5  -5  368.26   12.80
  -3   5   5  369.66   13.30
   2  -5  -5  226.78    8.80
  -2  -5   5  237.78    8.90
  -2   5   5  256.07    9.00
  -2   5   5  249.97    8.40
   2   5  -5  246.68    8.30
   2   5  -5  226.08    8.70
  -1  -5   5  154.18    5.40
   1  -5  -5  157.78    5.40
   1  -5  -5  150.78    6.00
  -1  -5   5  152.68    6.00
  -1   5   5  164.98    6.10
   1   5  -5  145.29    5.90
   0  -5   5   41.20    1.80
   0  -5  -5   38.70    1.80
   0  -5  -5   39.60    2.50
   0  -5   5   36.00    2.40
   0   5  -5   38.10    2.50
   0   5   5   37.00    2.40
  -1  -5  -5   17.30    1.40
   1  -5   5   20.00    2.00
   1  -5   5   20.70    1.60
  -1  -5  -5   19.60    2.00
  -1   5  -5   20.10    2.00
   1   5   5   20.90    2.20
   2  -5   5  399.76   14.00
  -2  -5  -5  419.36   14.10
   2  -5   5  408.86   14.00
  -2  -5  -5  389.36   13.70
  -2   5  -5  390.56   14.10
   2   5   5  396.46   14.30
  -3  -5  -5   59.59    3.10
  -3  -5  -5   61.59    3.30
   3  -5   5   62.39    3.50
   3  -5   5   55.39    3.00
  -3   5  -5   56.99    3.40
   3   5   5   61.29    3.60
  -4  -5  -5  398.16   14.30
  -4  -5  -5  404.06   14.20
   4  -5   5  407.66   14.70
  -4   5  -5  402.66   14.50
   4   5   5  389.36   14.80
   5  -5   5  184.08    8.10
  -5  -5  -5  190.38    7.80
   5   5   5  186.38    8.40
  -5   5  -5  187.58    8.00
  -6  -5  -5  123.69    6.50
   6  -5   5  124.49    6.70
  -6   5  -5  126.49    6.50
   6   5   5  129.59    7.50
   7  -5   5  123.89    7.90
  -7  -5  -5  126.39    6.80
   7   5   5  120.89    7.80
  -7   5  -5  129.19    7.00
  -8  -5  -5    2.90    3.70
   8  -5   5    0.20    4.10
  -8   5  -5   -0.90    3.90
   8   5   5    0.50    4.80
  -9  -5  -5    0.20    4.90
  10   6  -5   12.40    6.00
  -9  -6   5  116.29    7.90
   9  -6  -5  127.79    8.70
  -9   6   5  119.79    7.60
   9   6  -5  126.39    7.90
  -8  -6   5   11.80    3.30
   8  -6  -5   11.40    3.40
  -8   6   5    8.80    3.40
   8   6  -5    9.90    3.60
   7  -6  -5   13.90    3.00
  -7  -6   5   15.50    3.00
   7   6  -5   16.70    3.10
  -7   6   5   18.10    3.10
   6  -6  -5  259.67   10.60
  -6  -6   5  248.78   10.40
  -6   6   5  270.97   10.30
   6   6  -5  267.87   10.30
  -5  -6   5   39.50    3.20
  -5  -6   5   45.60    3.10
   5  -6  -5   38.60    2.90
   5   6  -5   35.70    3.00
  -5   6   5   46.90    3.10
  -5   6   5   37.10    3.40
   4  -6  -5   29.60    2.40
  -4  -6   5   34.10    2.60
  -4  -6   5   29.70    2.60
   4   6  -5   30.00    2.30
  -4   6   5   32.80    2.80
  -4   6   5   33.00    2.50
  -3  -6   5   -0.60    1.30
  -3  -6   5    1.60    1.20
   3  -6  -5    0.80    1.10
   3   6  -5    0.00    0.90
  -3   6   5    1.20    1.30
  -3   6   5    0.10    0.90
   2  -6  -5   25.50    2.20
  -2  -6   5   30.60    2.50
  -2   6   5   27.40    2.50
   2   6  -5   30.70    1.60
  -2   6   5   33.00    1.80
   2   6  -5   27.10    2.10
   1  -6  -5  833.82   28.90
  -1  -6   5  829.62   28.90
   1  -6  -5  886.41   28.20
  -1  -6   5  896.81   28.10
  -1   6   5  837.92   28.90
   1   6  -5  830.02   28.80
   0  -6  -5  293.77   10.70
   0  -6  -5  304.47    9.90
   0  -6   5  307.17   10.00
   0  -6   5  289.87   10.60
   0   6  -5  279.77   10.50
   0   6   5  288.77   10.70
   1  -6   5  345.17   11.60
  -1  -6  -5  354.96   12.10
  -1  -6  -5  347.57   11.50
   1  -6   5  330.37   12.00
  -1   6  -5  321.47   12.00
   1   6   5  325.67   12.10
  -2  -6  -5   18.70    1.90
   2  -6   5   15.40    1.70
  -2  -6  -5   15.90    1.60
   2  -6   5   16.20    1.80
  -2   6  -5   17.90    2.00
   2   6   5   17.70    2.00
  -3  -6  -5  314.17   11.40
  -3  -6  -5  315.57   11.20
   3  -6   5  325.07   11.50
   3  -6   5  322.77   11.30
  -3   6  -5  312.67   11.60
   3   6   5  299.97   11.80
  -4  -6  -5   11.10    1.80
   4  -6   5   11.90    2.00
  -4  -6  -5    8.60    1.60
   4   6   5    9.90    2.20
  -4   6  -5   14.30    2.30
   5  -6   5   58.09    4.20
  -5  -6  -5   56.29    4.00
  -5   6  -5   67.19    4.60
   5   6   5   57.19    4.60
  -6  -6  -5   38.70    3.80
   6  -6   5   40.30    4.20
   6   6   5   33.60    4.20
  -6   6  -5   31.90    3.60
   7  -6   5  146.19    8.50
  -7  -6  -5  155.18    7.50
   7   6   5  148.29    8.50
  -7   6  -5  135.19    7.90
  -8  -6  -5   12.00    3.60
   8  -6   5   13.10    4.60
   8   6   5    7.80    4.60
  -8   6  -5   11.70    3.90
  -9  -6  -5   58.19    6.50
   9  -7  -5   55.59    6.00
  -9  -7   5   49.20    5.60
   9   7  -5   41.10    5.10
  -9   7   5   36.30    4.80
  -8  -7   5   51.49    5.00
   8  -7  -5   46.70    5.00
  -8   7   5   42.00    4.50
   8   7  -5   53.79    5.10
  -7  -7   5  244.38    9.90
   7  -7  -5  237.78   10.30
  -7   7   5  229.88    9.60
   7   7  -5  214.48    9.60
   6  -7  -5  595.84   21.70
  -6  -7   5  602.64   21.70
   6   7  -5  610.44   21.50
  -6   7   5  618.54   21.40
  -5  -7   5   10.60    2.10
  -5  -7   5    5.70    1.70
   5  -7  -5    6.40    1.70
   5   7  -5    6.80    1.80
  -5   7   5    8.40    1.70
  -5   7   5    8.40    2.20
   4  -7  -5    2.50    1.40
  -4  -7   5    4.40    1.40
  -4  -7   5    3.00    1.50
  -4   7   5    5.70    1.80
  -4   7   5    4.20    1.40
   4   7  -5    2.50    1.20
  -3  -7   5  178.78    6.90
  -3  -7   5  171.08    6.80
   3  -7  -5  169.18    6.70
   3   7  -5  172.48    6.40
  -3   7   5  172.48    7.00
  -3   7   5  178.48    6.40
   2  -7  -5  936.21   32.50
  -2  -7   5  967.50   32.60
   2   7  -5  988.10   31.90
  -2   7   5  986.10   32.00
   2   7  -5  975.00   32.50
  -2   7   5  939.21   32.60
  -1  -7   5    0.60    1.10
   1  -7  -5    0.80    0.50
   1  -7  -5    0.60    1.20
   1   7  -5   -1.40    1.20
  -1   7   5    1.90    1.20
   0  -7  -5    9.40    0.80
   0  -7   5    5.50    1.30
   0  -7  -5   11.00    1.60
   0  -7   5    9.30    1.00
   0   7  -5    8.80    1.50
   0   7   5   10.80    1.50
  -1  -7  -5  360.06   11.70
   1  -7   5  340.37   11.90
  -1  -7  -5  357.76   12.50
   1  -7   5  342.97   12.30
  -1   7  -5  328.37   12.30
   1   7   5  344.57   12.50
   2  -7   5  597.34   20.10
  -2  -7  -5  606.04   19.90
  -2  -7  -5  594.54   20.40
   2  -7   5  590.74   20.20
   2   7   5  577.14   20.60
  -2   7  -5  569.94   20.40
  -3  -7  -5    4.00    1.50
   3  -7   5    7.60    1.70
   3  -7   5    4.10    1.40
  -3  -7  -5    7.70    1.30
   3   7   5    6.60    2.00
  -3   7  -5    3.20    1.60
   4  -7   5   11.70    2.20
  -4  -7  -5    8.10    1.70
  -4  -7  -5   11.00    2.00
  -4   7  -5   13.10    2.30
   4   7   5    8.90    2.20
   5  -7   5    9.60    2.50
  -5  -7  -5    7.50    2.20
  -5   7  -5    7.10    2.40
   5   7   5    8.80    2.90
   6  -7   5  134.39    7.10
  -6  -7  -5  143.69    6.60
   6   7   5  134.29    7.50
  -6   7  -5  130.19    6.80
  -7  -7  -5    4.40    3.00
   7  -7   5    4.10    3.20
  -7   7  -5    2.00    2.90
   7   7   5    2.20    3.60
   8  -7   5    7.10    4.30
  -8  -7  -5    1.00    3.80
  -8   7  -5    8.40    3.90
   8   7   5    2.60    4.50
  -9  -7  -5   27.90    5.30
  -9  -8   5   10.20    4.10
   9  -8  -5   10.20    4.30
  -9   8   5   11.00    4.30
  -8  -8   5   18.50    4.00
   8  -8  -5   11.90    3.50
   8   8  -5   12.80    3.80
  -8   8   5   16.40    3.60
  -7  -8   5    1.20    2.50
   7  -8  -5    6.10    2.70
  -7   8   5    0.40    2.30
   7   8  -5    1.40    2.70
  -6  -8   5   48.10    4.10
   6  -8  -5   52.39    4.60
  -6   8   5   53.69    3.80
   6   8  -5   54.69    4.10
  -5  -8   5    1.00    1.60
  -5  -8   5    0.10    1.90
   5  -8  -5   -0.40    1.50
  -5   8   5   -1.70    1.30
   5   8  -5   -0.60    1.50
  -5   8   5    0.20    1.80
  -4  -8   5  453.55   16.20
  -4  -8   5  437.86   16.20
   4  -8  -5  454.95   16.10
  -4   8   5  467.05   16.50
   4   8  -5  470.85   15.90
  -4   8   5  461.15   15.90
  -3  -8   5  997.80   33.70
   3  -8  -5  974.50   33.60
   3   8  -5  979.90   33.70
  -3   8   5 1007.40   33.90
  -3   8   5 1027.50   33.20
   3   8  -5  993.80   33.10
   2  -8  -5  143.69    5.80
  -2  -8   5  141.19    5.90
   2   8  -5  142.59    4.90
  -2   8   5  135.09    5.90
   2   8  -5  139.69    5.70
  -2   8   5  145.29    5.10
  -1  -8   5   21.70    2.10
   1  -8  -5   17.00    1.90
   1  -8  -5   18.40    1.00
   1   8  -5   20.30    2.00
  -1   8   5   22.20    2.10
   0  -8   5  264.37    8.70
   0  -8  -5  262.47    9.60
   0  -8   5  253.17    9.60
   0   8  -5  254.07    9.50
   0   8   5  254.97    9.60
  -1  -8  -5  135.79    4.70
  -1  -8  -5  129.39    5.50
   1  -8   5  127.99    5.40
   1  -8   5  137.19    5.00
  -1   8  -5  125.19    5.50
   1   8   5  133.59    5.60
   2  -8   5   35.00    2.50
  -2  -8  -5   41.30    2.90
   2  -8   5   38.60    2.30
  -2  -8  -5   34.70    2.10
   2   8   5   38.50    2.90
  -2   8  -5   35.90    2.70
  -3  -8  -5  669.73   22.80
   3  -8   5  680.13   23.00
  -3  -8  -5  671.93   23.20
   3  -8   5  690.43   23.10
  -3   8  -5  669.53   23.30
   3   8   5  654.03   23.50
   4  -8   5  729.83   25.00
  -4  -8  -5  715.43   24.60
  -4  -8  -5  721.53   24.70
   4   8   5  728.83   25.40
  -4   8  -5  703.53   25.10
   5  -8   5   83.39    5.10
  -5  -8  -5   91.49    4.90
   5   8   5   86.89    5.50
  -5   8  -5   94.79    5.50
   6  -8   5    9.40    3.20
  -6  -8  -5    9.20    2.60
   6   8   5    6.00    3.50
  -6   8  -5    8.30    2.70
   7  -8   5   12.60    3.60
  -7  -8  -5   20.90    3.60
  -7   8  -5   18.90    3.60
   7   8   5   20.80    4.20
  -8  -8  -5   34.80    4.80
   8  -8   5   21.70    4.80
  -8   8  -5   25.70    4.60
   8   8   5   30.70    5.40
  -9  -8  -5    8.90    5.20
  -9  -9   5   48.00    5.60
   9  -9  -5   40.00    5.50
  -9   9   5   50.69    5.20
  -8  -9   5   -1.20    3.40
   8  -9  -5    1.70    3.10
   8   9  -5    3.30    5.10
  -8   9   5    3.50    2.90
  -7  -9   5  159.48    7.60
   7  -9  -5  144.19    7.60
   7   9  -5  156.48    7.60
  -7   9   5  150.88    7.50
   6  -9  -5    1.20    2.30
  -6  -9   5    0.80    2.10
   6   9  -5   -0.80    2.20
  -6   9   5    0.60    2.10
   5  -9  -5   19.00    2.20
  -5  -9   5   17.80    2.50
  -5  -9   5   22.10    2.40
  -5   9   5   20.20    2.70
   5   9  -5   14.70    2.20
  -5   9   5   20.40    2.30
  -4  -9   5   13.50    1.90
  -4  -9   5   15.40    2.20
   4  -9  -5   13.60    1.90
   4   9  -5   15.70    1.80
  -4   9   5   16.40    1.80
  -4   9   5   15.30    2.20
  -3  -9   5  372.56   13.60
   3  -9  -5  386.56   13.50
   3   9  -5  379.66   12.90
  -3   9   5  368.26   13.70
  -3   9   5  386.76   13.00
   3   9  -5  364.66   13.50
  -2  -9   5  534.35   18.50
   2  -9  -5  512.65   18.40
   2   9  -5  541.45   17.50
   2   9  -5  509.25   18.30
  -2   9   5  544.45   17.70
  -2   9   5  517.85   18.50
   1  -9  -5   -0.10    1.20
  -1  -9   5    0.30    1.20
   1   9  -5    0.90    1.20
  -1   9   5    1.40    1.20
   0  -9   5   73.79    2.50
   0  -9  -5   71.29    3.70
   0  -9   5   61.79    3.50
   0   9  -5   69.39    3.60
   0   9   5   68.69    3.70
  -1  -9  -5  552.74   17.90
   1  -9   5  539.65   18.70
  -1  -9  -5  523.85   18.70
   1  -9   5  538.05   18.10
   1   9   5  523.35   18.80
  -1   9  -5  546.35   18.70
  -2  -9  -5  458.95   15.30
  -2  -9  -5  446.26   15.90
   2  -9   5  461.65   15.60
   2  -9   5  436.56   15.80
   2   9   5  449.76   16.20
  -2   9  -5  445.46   16.00
   3  -9   5   20.10    2.10
  -3  -9  -5   24.70    2.50
  -3  -9  -5   22.40    2.00
   3  -9   5   21.90    2.50
  -3   9  -5   26.50    2.80
   3   9   5   22.30    2.60
  -4  -9  -5   31.30    3.10
  -4  -9  -5   31.90    2.80
   4  -9   5   32.80    3.30
   4   9   5   32.30    3.50
  -4   9  -5   35.40    3.30
   5  -9   5  293.67   11.90
  -5  -9  -5  307.57   11.40
  -5   9  -5  291.87   11.70
   5   9   5  305.47   12.20
   6  -9   5  197.58    9.30
  -6  -9  -5  211.68    8.80
  -6   9  -5  208.08    9.20
   6   9   5  217.88    9.90
   7  -9   5   70.29    6.20
  -7  -9  -5   80.59    5.50
   7   9   5   87.09    6.80
  -7   9  -5   74.59    5.90
  -8  -9  -5   70.69    6.80
   8  -9   5   62.69    6.90
   8   9   5   65.39    7.60
  -8   9  -5   72.59    6.60
  -9 -10   5  157.88    9.50
   9 -10  -5  169.48   10.40
  -9  10   5  172.08    9.50
  -8 -10   5   44.40    5.00
   8 -10  -5   43.10    4.70
  -8  10   5   32.40    4.00
   7 -10  -5   71.79    5.40
  -7 -10   5   71.29    5.50
  -7  10   5   68.89    5.20
   6 -10  -5   21.40    3.10
  -6 -10   5   18.20    2.90
   6  10  -5   23.70    2.90
  -6  10   5   16.00    2.50
  -5 -10   5   67.29    4.20
   5 -10  -5   67.29    3.90
  -5 -10   5   79.39    4.20
   5  10  -5   67.29    3.90
  -5  10   5   67.09    3.90
  -5  10   5   65.89    4.50
  -4 -10   5  222.68    8.40
  -4 -10   5  212.88    8.50
   4 -10  -5  195.18    8.20
  -4  10   5  222.78    8.00
  -4  10   5  207.58    8.60
   4  10  -5  214.78    7.90
  -3 -10   5   28.30    2.80
   3 -10  -5   21.60    2.40
  -3  10   5   25.90    2.60
   3  10  -5   26.50    1.90
   3  10  -5   27.10    2.50
  -3  10   5   29.10    2.00
  -2 -10   5   80.49    3.90
   2 -10  -5   66.19    3.80
   2  10  -5   67.89    3.70
   2  10  -5   75.19    2.70
  -2  10   5   78.39    3.90
  -2  10   5   78.89    3.00
   1 -10  -5  352.06   13.10
  -1 -10   5  367.76   13.10
  -1  10   5  375.56   13.20
   1  10  -5  362.46   13.00
   0 -10  -5  848.12   28.20
   0 -10   5  807.62   28.10
   0  10   5  837.42   28.20
   0  10  -5  809.12   28.10
   1 -10   5  454.95   16.20
   1 -10   5  470.25   15.50
  -1 -10  -5  491.25   16.40
  -1 -10  -5  457.75   15.30
  -1  10  -5  446.76   16.20
   1  10   5  437.46   16.30
   2 -10   5  342.17   12.40
  -2 -10  -5  350.36   11.80
  -2 -10  -5  339.47   12.50
   2 -10   5  350.76   12.10
   2  10   5  362.96   12.80
  -2  10  -5  316.27   12.50
  -3 -10  -5    3.20    1.60
  -3 -10  -5    2.10    1.30
   3 -10   5    2.30    1.50
   3 -10   5    1.30    1.40
   3  10   5    2.10    1.80
  -3  10  -5    3.30    2.00
  -4 -10  -5    4.60    1.60
   4 -10   5    6.10    2.00
  -4 -10  -5    3.10    1.90
   4  10   5    9.00    2.40
  -4  10  -5    4.90    2.10
  -5 -10  -5    1.50    2.10
   5 -10   5    0.60    2.30
   5  10   5    2.40    2.80
  -5  10  -5    1.20    2.20
  -6 -10  -5  105.49    5.80
   6 -10   5   95.59    6.10
  -6  10  -5  100.19    6.00
   6  10   5  103.79    6.60
  -7 -10  -5   67.69    5.60
   7 -10   5   66.99    6.00
  -7  10  -5   64.19    6.40
   7  10   5   66.49    6.40
   8 -10   5   32.00    5.60
  -8  10  -5   30.20    5.20
   8  10   5   24.90    6.00
   9 -11  -5   45.30    5.90
  -9 -11   5   70.59    6.70
  -9  11   5   59.39    6.20
   8 -11  -5   22.20    4.10
  -8 -11   5   20.80    4.30
  -8  11   5   20.50    3.90
   7 -11  -5   40.70    4.60
  -7 -11   5   40.00    4.40
  -7  11   5   31.20    3.70
  -6 -11   5   10.00    2.70
  -6  11   5   16.10    2.60
  -6  11   5   16.00    3.10
  -5 -11   5   50.89    3.80
   5 -11  -5   55.09    3.70
  -5 -11   5   54.09    3.80
  -5  11   5   52.89    4.10
  -5  11   5   56.29    3.60
  -4 -11   5   51.69    3.50
   4 -11  -5   44.10    3.40
  -4 -11   5   54.79    3.60
  -4  11   5   51.39    3.00
   4  11  -5   47.30    3.00
  -4  11   5   49.10    3.70
  -3 -11   5  400.46   14.20
   3 -11  -5  377.06   14.10
   3  11  -5  388.56   13.60
  -3  11   5  390.56   14.30
  -3  11   5  392.26   13.40
   3  11  -5  402.66   14.20
  -2 -11   5  154.38    6.40
   2 -11  -5  140.19    6.30
   2  11  -5  150.98    6.30
  -2  11   5  162.38    5.50
  -2  11   5  157.58    6.50
   1 -11  -5  149.99    6.60
  -1 -11   5  169.28    6.60
   1  11  -5  160.38    6.50
  -1  11   5  160.18    6.70
   0 -11  -5  244.78    9.30
   0 -11   5  234.68    9.20
   0  11   5  238.28    9.30
   0  11  -5  251.97    9.20
   1 -11   5    2.70    1.40
  -1 -11  -5    2.20    1.50
   1 -11   5    2.00    0.90
  -1 -11  -5    2.20    0.60
   1  11   5    0.80    1.30
  -1  11  -5    3.00    1.60
   2 -11   5  137.89    6.10
  -2 -11  -5  146.89    6.30
  -2 -11  -5  152.18    5.30
   2 -11   5  149.29    5.70
   2  11   5  134.39    6.30
  -2  11  -5  142.99    6.20
  -3 -11  -5  115.89    5.50
   3 -11   5  117.79    5.40
   3 -11   5  128.89    5.30
  -3 -11  -5  118.99    5.00
   3  11   5  123.69    5.90
  -3  11  -5  125.79    5.80
   4 -11   5  390.16   13.90
  -4 -11  -5  385.76   13.90
  -4 -11  -5  368.36   13.50
   4  11   5  366.86   14.40
  -4  11  -5  371.36   14.10
  -5 -11  -5  135.99    6.30
   5 -11   5  141.69    7.00
  -5  11  -5  146.09    7.10
   5  11   5  138.09    7.30
  -6 -11  -5   12.50    3.00
   6 -11   5    9.30    3.00
  -6  11  -5   11.20    3.00
   6  11   5    7.40    3.30
   7 -11   5   28.80    4.40
  -7  11  -5   37.40    4.60
   7  11   5   35.20    5.00
   8 -11   5    7.30    4.50
   8  11   5    5.80    5.50
  -8  11  -5    6.30    4.20
  -9 -12   5   23.70    5.60
   9 -12  -5   14.70    4.80
  -9  12   5   19.10    4.80
  -8 -12   5   71.09    6.80
   8 -12  -5   77.69    6.40
  -8  12   5   67.29    5.60
   7 -12  -5   -0.10    2.70
  -7 -12   5    1.10    2.70
  -7  12   5    2.50    2.40
  -6 -12   5   36.50    3.90
  -6  12   5   37.40    4.30
  -6  12   5   37.30    3.80
  -5 -12   5  316.47   12.20
  -5 -12   5  325.27   12.00
   5 -12  -5  306.57   11.80
  -5  12   5  313.77   11.70
  -5  12   5  325.67   12.50
  -4 -12   5  243.18    9.40
   4 -12  -5  231.88    9.30
  -4  12   5  244.58    8.80
   4  12  -5  231.78    9.40
  -4  12   5  236.78    9.70
   3 -12  -5   61.69    3.70
  -3 -12   5   68.39    4.00
  -3  12   5   60.99    3.90
  -3  12   5   63.39    3.00
   3  12  -5   72.59    3.80
  -2 -12   5   70.09    4.00
   2 -12  -5   72.39    3.90
  -2  12   5   77.09    2.90
   2  12  -5   73.69    3.80
  -2  12   5   60.69    3.80
  -1 -12   5   93.49    4.60
   1 -12  -5   98.19    4.70
  -1  12   5   94.19    4.80
   1  12  -5  100.59    4.50
   0 -12   5    2.60    1.40
   0 -12  -5    0.50    1.50
   0  12  -5    5.50    1.60
   0  12   5    2.30    1.50
   1 -12   5    6.10    1.10
   1 -12   5    5.90    1.70
  -1 -12  -5    7.30    1.80
  -1  12  -5    8.10    1.80
   1  12   5    4.30    1.80
   2 -12   5  212.88    8.30
  -2 -12  -5  212.98    8.50
   2 -12   5  217.08    7.80
  -2  12  -5  194.58    8.40
   2  12   5  220.08    8.70
   3 -12   5  539.05   18.80
   3 -12   5  544.85   18.70
  -3 -12  -5  519.55   19.00
   3  12   5  531.55   19.30
  -3  12  -5  541.05   19.20
  -4 -12  -5  514.05   17.70
   4 -12   5  484.25   17.50
  -4  12  -5  468.85   17.80
   4  12   5  496.35   18.20
   5 -12   5   37.10    4.10
  -5  12  -5   36.40    3.80
   5  12   5   40.30    4.50
   6 -12   5  308.77   12.30
  -6  12  -5  305.67   12.30
   6  12   5  283.17   12.80
   7 -12   5    2.80    3.90
  -7  12  -5    3.60    3.40
   7  12   5    3.90    4.40
   8 -12   5  142.89   10.00
   8  12   5  143.99   10.80
  -8  12  -5  135.09    9.30
   9 -13  -5    1.70    5.00
  -9 -13   5    2.50    4.50
  -9  13   5    5.60    4.40
   8 -13  -5    5.80    3.80
  -8 -13   5    1.70    3.90
  -8  13   5   -2.80    3.30
  -7 -13   5  126.19    7.00
   7 -13  -5  117.59    7.20
  -7  13   5  137.79    6.90
  -6 -13   5  239.28   10.10
  -6  13   5  247.68   10.50
  -6  13   5  237.08    9.60
   5 -13  -5  115.39    5.90
  -5 -13   5  121.99    6.00
  -5 -13   5  120.79    6.30
  -5  13   5  122.19    5.50
  -5  13   5  121.79    6.30
  -4 -13   5   -0.90    1.80
   4 -13  -5   -1.30    1.80
  -4  13   5    0.40    1.40
   4  13  -5    0.10    1.80
  -4  13   5   -0.60    1.90
  -3 -13   5    8.80    1.90
   3 -13  -5    7.40    1.90
  -3  13   5    5.80    1.90
  -3  13   5    7.10    1.30
   3  13  -5    6.70    1.80
  -2 -13   5    7.60    1.80
   2 -13  -5    8.30    1.90
  -2  13   5    8.70    1.80
   2  13  -5    9.50    2.00
  -1 -13   5  262.57    9.90
   1 -13  -5  256.17   10.00
   1  13  -5  271.47    9.80
  -1  13   5  248.78    9.90
   0 -13   5  100.79    5.10
   0 -13  -5  121.89    5.40
   0  13  -5  120.19    5.20
   0  13   5  105.49    5.20
   1 -13   5  269.47   10.60
  -1 -13  -5  292.97   10.90
   1 -13   5  284.77    9.90
   1  13   5  285.27   10.90
  -1  13  -5  295.17   10.80
  -2 -13  -5   22.70    2.50
   2 -13   5   16.90    2.20
   2 -13   5   19.20    2.20
  -2  13  -5   21.20    2.50
   2  13   5   19.10    2.70
  -3 -13  -5    1.30    2.00
   3 -13   5    1.70    1.60
   3 -13   5    0.90    1.70
  -3  13  -5   -0.30    1.80
   3  13   5   -0.20    1.90
   4 -13   5    8.80    2.10
  -4 -13  -5    4.20    2.00
   4  13   5    6.00    2.60
  -4  13  -5    7.80    2.50
   5 -13   5    1.70    2.60
   5  13   5    3.00    3.00
  -5  13  -5    3.30    2.90
   6 -13   5   16.40    3.30
   6  13   5   17.90    4.20
  -6  13  -5   19.90    3.60
   7 -13   5    2.10    4.00
  -7  13  -5    8.10    3.70
   7  13   5    6.40    4.20
   8 -13   5    3.10    4.40
  -8  13  -5    2.90    4.40
   8  13   5    6.00    6.00
   8 -14  -5   20.30    4.30
  -8 -14   5    8.10    4.30
  -8  14   5   15.00    3.80
   7 -14  -5    0.40    2.90
  -7 -14   5    7.90    3.40
  -7  14   5    5.70    2.90
  -6 -14   5   56.09    5.00
  -6  14   5   64.29    5.50
  -6  14   5   55.29    4.20
   5 -14  -5   59.79    4.70
  -5 -14   5   66.09    4.50
  -5 -14   5   66.49    4.60
  -5  14   5   69.29    4.20
  -5  14   5   69.49    4.90
   4 -14  -5  216.28    8.80
  -4 -14   5  205.78    8.80
  -4  14   5  214.88    9.10
  -4  14   5  229.88    9.70
   4  14  -5  226.98    9.00
   3 -14  -5  401.06   14.90
  -3 -14   5  405.16   14.80
   3  14  -5  408.56   14.70
  -3  14   5  408.96   15.00
   2 -14  -5  119.19    5.80
  -2 -14   5  133.39    5.90
   2  14  -5  130.09    5.90
  -2  14   5  124.29    5.90
   1 -14  -5   44.80    3.40
  -1 -14   5   38.50    3.10
   1  14  -5   43.40    3.10
  -1  14   5   44.80    3.20
   0 -14  -5 1257.27   42.10
   0 -14   5 1205.68   42.00
   0  14  -5 1272.57   41.90
   0  14   5 1233.08   42.10
  -1 -14  -5    2.00    1.80
   1 -14   5    0.50    1.50
   1  14   5    1.30    1.70
  -1  14  -5    2.50    1.80
   2 -14   5    1.80    1.30
   2 -14   5    1.00    1.50
  -2 -14  -5    0.50    1.80
  -2  14  -5   -1.40    1.80
   2  14   5    1.80    1.90
   3 -14   5   42.90    3.50
  -3 -14  -5   54.29    4.20
   3 -14   5   47.00    3.20
   3  14   5   50.19    4.00
  -3  14  -5   44.30    4.10
   4 -14   5   78.09    4.60
  -4 -14  -5   67.69    4.90
  -4  14  -5   63.49    4.70
   4  14   5   77.29    5.50
   5 -14   5   34.70    3.70
   5  14   5   38.70    4.20
  -5  14  -5   32.20    3.80
   6 -14   5   41.20    4.40
   6  14   5   45.60    5.00
  -6  14  -5   43.00    4.50
   7 -14   5   82.69    7.30
  -7  14  -5   90.39    7.40
   7  14   5   89.89    7.70
   8 -14   5   49.40    6.40
  -8 -15   5  112.19    7.60
   8 -15  -5  118.59    8.60
  -7 -15   5   -3.60    2.80
   7 -15  -5    0.00    3.20
  -6 -15   5   14.80    3.10
  -6  15   5   12.20    3.20
  -5 -15   5  135.79    6.50
   5  15  -5  128.39    6.70
  -5  15   5  125.79    6.80
   4 -15  -5  161.58    7.20
  -4 -15   5  161.28    7.30
   4  15  -5  167.28    7.30
  -4  15   5  165.58    7.50
   3 -15  -5   52.09    3.80
  -3 -15   5   53.09    3.70
  -3  15   5   49.99    3.90
   3  15  -5   50.49    3.60
  -2 -15   5  627.94   22.50
   2 -15  -5  661.23   22.60
   2  15  -5  652.43   22.30
  -2  15   5  618.54   22.50
  -1 -15   5   51.79    3.70
   1 -15  -5   59.39    3.90
   1  15  -5   52.19    3.80
  -1  15   5   56.89    3.80
   0 -15  -5  136.39    6.70
   0 -15   5  152.88    6.70
   0  15   5  151.68    6.70
   0  15  -5  157.88    6.70
  -1 -15  -5   18.40    2.80
   1 -15   5   11.40    2.00
  -1  15  -5   20.40    2.70
   1  15   5   18.40    2.40
   2 -15   5   -0.60    1.50
  -2 -15  -5    0.10    2.00
  -2  15  -5    1.50    2.20
   2  15   5    0.00    2.10
   3 -15   5  212.38    8.40
  -3 -15  -5  197.68    8.70
   3 -15   5  195.28    8.30
  -3  15  -5  199.58    8.60
   3  15   5  207.18    8.80
   4 -15   5    3.20    2.10
  -4 -15  -5    7.50    2.60
   4  15   5    3.00    2.50
  -4  15  -5    3.80    2.50
   5 -15   5   17.60    3.20
   5  15   5   14.60    3.70
  -5  15  -5   16.60    3.30
   6 -15   5  106.19    6.90
   6  15   5  111.59    7.90
  -6  15  -5  103.39    6.80
   7 -15   5   33.60    4.90
  -7  15  -5   25.80    4.80
   7  15   5   19.00    4.90
   8 -15   5    8.80    5.50
  -8 -16   5   68.29    6.60
   8 -16  -5   64.29    6.50
   7 -16  -5    5.40    3.40
  -7 -16   5    7.00    3.40
  -6 -16   5   -0.80    2.90
  -6  16   5    1.50    2.80
  -5 -16   5  258.77   10.60
   5  16  -5  255.57   10.60
  -5  16   5  263.97   11.00
  -4 -16   5   24.00    2.90
   4 -16  -5   31.90    3.40
  -4  16   5   39.60    3.80
   4  16  -5   28.40    3.30
   3 -16  -5  293.87   11.40
  -3 -16   5  301.37   11.30
  -3  16   5  270.37   11.20
   3  16  -5  279.77   11.00
  -2 -16   5   62.89    4.20
   2 -16  -5   68.19    4.40
   2  16  -5   69.89    4.10
  -2  16   5   65.19    4.20
  -1 -16   5   41.40    3.30
   1 -16  -5   35.70    3.60
   1  16  -5   32.90    3.10
  -1  16   5   37.70    3.40
   0 -16  -5   21.00    2.70
   0 -16   5   12.20    2.20
   0  16   5   14.30    2.40
   0  16  -5   17.60    2.40
   1 -16   5   69.59    4.50
  -1 -16  -5   77.39    4.70
  -1  16  -5   69.49    4.30
   1  16   5   79.79    4.80
  -2 -16  -5   16.50    2.70
   2 -16   5   14.80    2.50
  -2  16  -5   13.70    2.70
   2  16   5   14.40    2.50
   3 -16   5  248.88    9.80
  -3 -16  -5  254.27   10.30
  -3  16  -5  226.28    9.90
   3  16   5  248.48   10.20
  -4 -16  -5    0.30    2.60
   4  16   5    8.60    2.90
  -4  16  -5    4.90    2.60
   5 -16   5  116.69    8.70
   5  16   5  143.19    7.60
  -5  16  -5  124.99    7.10
   6 -16   5    1.50    3.00
  -6  16  -5    1.90    3.30
   6  16   5    1.90    3.50
   7 -16   5   15.60    6.50
   7  16   5   12.50    5.30
  -7  16  -5   19.30    4.50
  -8 -17   5   24.40    4.80
   8 -17  -5   20.20    5.20
   7 -17  -5    4.90    3.60
  -7 -17   5    9.30    3.80
   6  17  -5  150.38    8.00
  -6  17   5  176.68    8.90
  -5 -17   5  112.59    6.20
   5  17  -5  102.99    6.30
  -5  17   5  121.49    6.90
   4 -17  -5  147.89    7.20
  -4 -17   5  130.99    6.80
   4  17  -5  155.48    6.90
  -4  17   5  151.58    7.30
  -3 -17   5    1.20    2.00
   3 -17  -5   -1.40    2.10
  -3  17   5    0.10    2.10
   3  17  -5   -0.40    2.10
  -2 -17   5  187.58    8.10
   2 -17  -5  203.98    8.60
  -2  17   5  189.68    8.40
   2  17  -5  184.98    8.00
   1 -17  -5   -2.70    1.90
  -1 -17   5    0.10    1.80
  -1  17   5    0.80    1.90
   1  17  -5    0.30    1.80
   0 -17   5   68.29    4.20
   0 -17  -5   67.69    4.60
   0  17  -5   60.49    4.10
   0  17   5   68.59    4.30
  -1 -17  -5   16.60    2.80
   1 -17   5   20.20    2.80
  -1  17  -5   25.00    2.90
   1  17   5   17.90    2.90
   2 -17   5    0.00    1.80
  -2 -17  -5    1.90    2.20
   2  17   5    1.90    2.10
  -2  17  -5   -1.00    2.30
   3 -17   5    0.60    1.90
  -3 -17  -5    0.20    2.30
  -3  17  -5    2.10    2.40
   3  17   5    1.90    2.40
  -4 -17  -5   10.80    2.90
  -4  17  -5   12.20    3.00
   4  17   5   10.00    3.30
  -5  17  -5    4.60    3.10
   5  17   5    6.30    3.20
   6  17   5    8.00    4.20
  -6  17  -5    3.40    3.50
  -7  17  -5   36.80    5.60
   7  17   5   42.40    6.00
  -8 -18   5   21.60    4.80
   8 -18  -5   17.30    5.40
  -7 -18   5   22.80    4.10
   7 -18  -5   15.60    4.20
   6  18  -5    7.10    3.20
  -6  18   5   13.90    3.50
  -5 -18   5    5.60    2.80
   5  18  -5    4.90    2.70
  -5  18   5   10.70    3.00
   4 -18  -5   -0.80    2.60
  -4 -18   5    0.00    2.30
   4  18  -5    0.70    2.20
  -4  18   5   -0.30    2.30
   3 -18  -5    0.30    2.50
  -3 -18   5    0.50    2.00
   3  18  -5   -0.20    2.20
  -3  18   5    0.20    2.20
   2 -18  -5   86.79    5.30
  -2 -18   5   89.89    5.40
   2  18  -5   84.29    5.10
  -2  18   5   86.89    5.10
  -1 -18   5  236.48    9.60
   1 -18  -5  233.78    9.80
   1  18  -5  238.68    9.50
  -1  18   5  233.18    9.60
   0 -18   5   43.30    3.60
   0 -18  -5   33.60    3.80
   0  18   5   38.30    3.60
   0  18  -5   34.40    3.40
  -1 -18  -5   77.89    5.10
   1 -18   5   78.49    4.70
  -1  18  -5   84.59    5.10
   1  18   5   76.89    4.80
   2 -18   5   46.10    3.80
  -2 -18  -5   47.70    4.40
  -2  18  -5   49.99    4.10
   2  18   5   55.29    4.60
  -3 -18  -5    5.00    2.80
   3 -18   5    1.90    2.30
  -3  18  -5    0.90    2.70
   3  18   5    1.80    2.80
  -4 -18  -5   81.09    5.60
   4  18   5   91.39    6.00
  -4  18  -5   94.49    5.90
   5  18   5    4.00    3.60
  -5  18  -5    0.30    3.00
  -6  18  -5    5.10    4.20
   6  18   5   10.70    4.10
   7  18   5   17.00    5.30
  -7  18  -5   24.70    5.30
  -8 -19   5  125.09    9.30
   8 -19  -5  119.49    8.80
   7 -19  -5   35.00    5.20
   7  19  -5   45.40    5.10
   6  19  -5  100.99    7.00
  -6  19   5  107.49    7.00
  -5 -19   5   39.50    4.30
   5  19  -5   37.40    4.20
  -5  19   5   38.20    4.50
   4 -19  -5   21.40    3.50
  -4 -19   5   14.40    2.90
  -4  19   5   19.60    3.30
   4  19  -5   19.10    3.00
  -3 -19   5   83.99    5.40
   3 -19  -5  101.99    5.80
  -3  19   5  107.99    6.10
   3  19  -5   97.49    5.40
  -2 -19   5  484.25   17.70
   2 -19  -5  468.85   17.80
  -2  19   5  478.65   17.80
   2  19  -5  493.35   17.60
   1 -19  -5   41.20    4.10
  -1 -19   5   47.90    3.90
   1  19  -5   38.90    3.70
   0 -19   5  373.66   13.90
   0 -19  -5  359.16   13.90
   0  19  -5  340.47   13.50
   0  19   5  365.46   13.90
   1 -19   5  587.04   21.10
  -1 -19  -5  575.94   21.30
   1  19   5  596.04   21.30
  -1  19  -5  593.94   21.00
  -2 -19  -5   42.50    4.40
   2 -19   5   40.90    4.10
  -2  19  -5   38.60    4.00
   2  19   5   40.40    4.10
   3 -19   5   10.90    2.70
  -3 -19  -5    8.60    2.90
  -3  19  -5   15.80    3.30
   3  19   5    9.90    2.90
  -4 -19  -5   16.80    3.30
   4  19   5   18.20    3.50
  -4  19  -5   18.00    3.70
  -5  19  -5   31.60    4.20
   5  19   5   28.80    4.40
  -6  19  -5   14.30    4.40
   6  19   5    8.40    4.20
  -7  19  -5    1.90    4.30
   7  19   5   -0.40    5.50
   8  20  -5    1.20    5.20
   7 -20  -5  125.99    8.30
   7  20  -5  128.39    8.00
  -6 -20   5    2.90    3.50
   6  20  -5    0.60    3.30
  -6  20   5    5.30    3.80
  -5 -20   5   68.59    5.60
   5  20  -5   57.89    5.10
  -5  20   5   74.99    5.60
   4 -20  -5   33.90    4.00
  -4 -20   5   26.40    3.40
  -4  20   5   25.20    3.60
   4  20  -5   25.80    3.40
  -3 -20   5   13.80    2.90
   3 -20  -5   12.90    2.90
   3  20  -5   10.20    2.70
  -3  20   5   12.00    2.80
   2 -20  -5    2.70    2.50
  -2 -20   5    1.60    2.20
  -2  20   5    3.70    2.40
   2  20  -5    4.10    2.20
   1 -20  -5   -1.30    2.30
  -1 -20   5   -1.70    2.00
   1  20  -5    0.60    2.10
  -1  20   5    0.70    2.20
   0 -20  -5    0.00    2.40
   0 -20   5   -0.50    2.10
   0  20   5    1.20    2.20
   0  20  -5    2.30    2.30
  -1 -20  -5  151.38    7.60
   1 -20   5  147.99    7.10
  -1  20  -5  158.88    7.20
   1  20   5  146.69    7.30
   2 -20   5   40.10    3.90
  -2 -20  -5   44.50    4.60
  -2  20  -5   41.70    4.20
   2  20   5   44.00    4.30
  -3 -20  -5    0.70    2.70
   3 -20   5   -0.50    2.10
  -3  20  -5   -0.90    2.90
   3  20   5    0.10    2.80
  -4 -20  -5   11.60    3.40
   4  20   5   18.20    3.70
  -4  20  -5   15.10    3.40
   5  20   5   62.29    6.70
  -5  20  -5   56.49    5.70
   6  20   5    1.80    4.10
  -6  20  -5   -3.40    3.60
   7  20   5   45.70    6.70
   7 -21  -5   41.50    5.80
   7  21  -5   52.69    5.80
  -6 -21   5    3.40    5.30
   6  21  -5    2.50    3.70
  -6  21   5    6.50    3.70
  -5 -21   5   95.69    6.40
  -5  21   5   91.79    6.30
   5  21  -5   70.99    5.60
  -4 -21   5   18.50    3.20
   4 -21  -5   14.30    3.20
   4  21  -5   13.60    3.30
  -4  21   5   20.20    3.50
   3 -21  -5   12.90    3.40
  -3 -21   5   12.30    2.90
  -3  21   5   15.40    3.30
   3  21  -5   12.40    2.80
   2 -21  -5   48.90    4.80
  -2 -21   5   47.40    4.40
   2  21  -5   48.00    4.10
  -2  21   5   55.39    4.60
   1 -21  -5  143.09    7.30
  -1 -21   5  140.49    7.20
   1  21  -5  136.49    6.90
  -1  21   5  142.39    7.20
   0 -21   5   12.20    3.00
   0 -21  -5    5.80    2.80
   0  21   5    6.30    2.60
   0  21  -5   10.30    2.60
  -1 -21  -5   67.49    5.70
   1 -21   5   72.69    5.00
  -1  21  -5   71.99    5.30
   1  21   5   64.39    4.90
   2 -21   5   10.00    2.60
  -2 -21  -5   16.10    3.60
   2  21   5   12.00    2.90
  -2  21  -5    8.00    2.80
   3 -21   5    6.50    2.90
  -3 -21  -5    3.10    3.20
   3  21   5    3.80    2.80
  -3  21  -5    6.40    3.30
  -4 -21  -5   -1.10    3.40
  -4  21  -5    1.60    3.00
   4  21   5    3.30    3.20
  -5  21  -5    2.40    3.90
   5  21   5    3.30    3.70
   6  21   5    1.10    4.20
  -6  21  -5    2.60    4.40
   7 -22  -5   -1.00    4.10
   7  22  -5    0.00    4.20
  -6 -22   5    1.50    4.70
   6  22  -5   -2.80    3.30
  -6  22   5   -2.70    3.50
  -5 -22   5    9.40    3.50
  -5  22   5    5.80    3.40
   5  22  -5    9.30    3.50
   4 -22  -5   67.39    5.80
  -4 -22   5   54.99    5.00
  -4  22   5   64.99    5.40
   4  22  -5   56.89    5.30
  -3 -22   5   67.39    5.10
   3 -22  -5   63.49    5.30
  -3  22   5   58.69    5.00
   3  22  -5   51.89    4.70
  -2 -22   5   53.19    4.80
   2 -22  -5   55.59    5.50
  -2  22   5   51.09    5.20
   2  22  -5   54.09    4.80
   1 -22  -5    1.20    2.70
  -1 -22   5    4.50    2.50
  -1  22   5    2.20    2.50
   1  22  -5    2.20    2.40
   0 -22  -5  239.28   10.40
   0 -22   5  233.28    9.90
   0  22  -5  207.98    9.50
   0  22   5  229.48   10.00
   1 -22   5    4.20    2.80
  -1 -22  -5    7.10    3.10
  -1  22  -5    7.10    3.00
   1  22   5    3.10    2.90
  -2 -22  -5    1.90    2.90
   2 -22   5    4.00    2.60
  -2  22  -5    1.70    2.90
   2  22   5    4.50    3.10
   3 -22   5   16.80    3.40
  -3 -22  -5   23.40    4.20
   3  22   5   20.50    3.60
  -3  22  -5   21.70    3.60
  -4 -22  -5   -0.60    3.60
   4  22   5    1.00    3.10
  -4  22  -5    1.00    3.20
  -5  22  -5   12.10    4.00
   5  22   5   17.00    4.80
  -6  22  -5    5.10    4.80
   6  22   5   10.90    5.30
   7 -23  -5  124.29    8.80
   7  23  -5  119.29    8.40
  -6 -23   5   26.50    6.60
  -6  23   5   26.70    4.90
   6  23  -5   26.90    4.60
  -5 -23   5  139.59    7.90
  -5  23   5  129.39    7.80
   5  23  -5  118.79    7.30
  -4 -23   5    0.20    2.60
   4 -23  -5   -1.70    2.90
   4  23  -5    2.60    2.90
  -4  23   5    0.60    3.30
  -3 -23   5    8.60    3.30
   3 -23  -5    2.50    3.30
   3  23  -5    6.30    2.90
  -3  23   5    1.30    2.80
  -2 -23   5    2.40    2.70
   2 -23  -5    0.30    2.90
  -2  23   5    0.70    2.90
   2  23  -5   -0.20    2.50
  -1 -23   5    0.40    2.70
   1 -23  -5    1.20    2.90
   1  23  -5    2.20    2.50
  -1  23   5    1.90    2.60
   0 -23  -5  202.48    9.40
   0 -23   5  209.58    9.10
   0  23   5  188.48    8.90
   0  23  -5  181.48    8.60
  -1 -23  -5  250.17   10.80
   1 -23   5  219.28   10.20
   1  23   5  254.67   10.70
  -1  23  -5  228.58   10.10
  -2 -23  -5   62.69    5.60
   2 -23   5   57.29    4.90
  -2  23  -5   49.80    4.80
   2  23   5   68.09    5.80
   3 -23   5   74.79    5.80
  -3 -23  -5   68.19    6.00
  -3  23  -5   69.39    6.10
   3  23   5   67.19    6.10
  -4 -23  -5   26.00    4.30
   4  23   5   32.90    4.80
  -4  23  -5   36.60    4.70
  -5  23  -5    3.30    3.80
   5  23   5    2.20    3.90
   6  23   5   13.50    5.20
  -6  23  -5   10.60    4.60
   7  24  -5    6.10    5.20
   6  24  -5    0.40    4.30
  -6  24   5    7.00    4.30
  -5 -24   5    1.30    3.30
   5  24  -5    1.50    3.70
  -5  24   5    2.40    4.00
   4 -24  -5   94.39    7.10
  -4 -24   5   96.09    6.40
   4  24  -5   79.49    6.00
  -4  24   5   98.39    6.60
   3 -24  -5  152.48    8.30
  -3 -24   5  160.48    8.20
  -3  24   5  165.28    8.30
   3  24  -5  149.59    7.70
  -2 -24   5    0.20    2.80
   2 -24  -5    3.60    3.40
  -2  24   5   -1.10    2.70
   2  24  -5   -0.60    2.60
   1 -24  -5  114.29    7.40
  -1 -24   5  113.89    6.70
   1  24  -5  118.59    6.40
  -1  24   5  121.79    6.80
   0 -24   5   36.40    4.10
   0 -24  -5   32.70    4.20
   0  24   5   43.20    4.60
   0  24  -5   38.00    4.10
  -1 -24  -5    6.70    3.30
   1 -24   5    5.10    3.20
   1  24   5   15.00    3.30
  -1  24  -5    5.40    2.90
   2 -24   5   68.79    5.80
  -2 -24  -5   53.79    5.80
   2  24   5   67.39    6.00
  -2  24  -5   66.49    5.80
   3 -24   5   77.39    6.10
  -3 -24  -5   75.59    6.40
  -3  24  -5   75.39    5.90
   3  24   5   88.99    6.20
  -4 -24  -5  173.08    9.80
   4  24   5  171.58    9.20
  -4  24  -5  173.98    9.50
  -5  24  -5   30.20    5.30
   5  24   5   24.30    5.30
   6  24   5   13.30    5.80
  -6  24  -5    8.10    4.70
  -6  25   5   34.60    5.50
   6  25  -5   30.00    5.10
  -5 -25   5   -2.50    3.80
  -5  25   5    0.00    3.60
   5  25  -5   -1.80    3.80
  -4 -25   5    3.70    3.60
   4 -25  -5    2.60    3.80
  -4  25   5    0.80    3.70
   4  25  -5    3.20    3.60
   3 -25  -5   31.80    4.60
  -3 -25   5   27.60    4.10
  -3  25   5   26.80    4.00
   3  25  -5   27.30    3.80
   2 -25  -5   54.59    5.60
  -2 -25   5   52.29    5.30
  -2  25   5   53.29    5.20
   2  25  -5   53.59    5.40
   1 -25  -5   -2.10    3.00
  -1 -25   5    2.30    2.80
  -1  25   5    1.70    3.20
   1  25  -5    0.50    3.10
   0 -25  -5   10.10    3.70
   0 -25   5    4.50    2.90
   0  25   5    7.40    3.30
   0  25  -5    6.70    3.30
   1 -25   5   17.50    3.50
  -1 -25  -5   27.10    4.60
  -1  25  -5   14.30    3.70
   1  25   5   15.50    3.40
  -2 -25  -5   -0.40    3.40
   2 -25   5   -1.30    2.80
   2  25   5    2.70    3.40
  -2  25  -5    1.20    3.30
  -3 -25  -5   38.00    5.00
   3 -25   5   36.50    4.20
   3  25   5   31.70    4.50
  -3  25  -5   29.80    4.50
  -4 -25  -5   14.60    4.70
  -4  25  -5   14.40    4.10
   4  25   5   16.10    4.70
  -5  25  -5    9.20    5.10
   5  25   5    7.60    4.40
   6  26  -5   44.90    6.10
  -6  26   5   43.60    6.40
  -5 -26   5   -0.30    3.50
  -5  26   5    5.40    4.00
   5  26  -5    0.80    3.70
  -4 -26   5   93.49    7.00
   4 -26  -5  102.49    7.80
  -4  26   5   92.09    7.50
   4  26  -5   92.19    7.10
   3 -26  -5   62.09    6.70
  -3 -26   5   57.99    5.80
  -3  26   5   63.99    5.80
   3  26  -5   54.09    5.30
  -2 -26   5  413.96   16.70
   2 -26  -5  399.86   16.50
   2  26  -5  422.36   16.10
  -2  26   5  413.16   16.30
   1 -26  -5  225.78   10.50
  -1 -26   5  210.48   10.20
   1  26  -5  214.78    9.70
  -1  26   5  225.48   10.40
   0 -26  -5  227.18   10.60
   0 -26   5  194.78    9.60
   0  26  -5  191.58    9.50
   0  26   5  205.68    9.90
  -1 -26  -5   76.89    7.20
   1 -26   5   85.49    6.20
  -1  26  -5   78.99    5.90
   1  26   5   86.99    6.60
  -2 -26  -5    3.60    3.70
   2 -26   5    0.90    3.10
   2  26   5    1.60    3.10
  -2  26  -5    3.50    3.50
   3 -26   5    5.50    3.60
  -3 -26  -5   -1.50    4.20
   3  26   5    9.70    4.30
  -3  26  -5    5.60    3.90
  -4 -26  -5   55.29    6.30
  -4  26  -5   46.40    5.80
   4  26   5   48.30    5.60
  -5  26  -5   58.89    6.30
   5  26   5   51.09    6.80
   6  27  -5   87.69    8.60
  -6  27   5   80.49    9.10
  -5 -27   5   21.00    4.60
  -5  27   5   23.40    5.40
   5  27  -5   27.70    5.20
   4 -27  -5   40.20    5.30
  -4 -27   5   25.40    4.50
  -4  27   5   37.40    5.00
   4  27  -5   39.80    4.80
  -3 -27   5    0.10    3.40
   3 -27  -5   -2.40    4.00
  -3  27   5    1.80    3.50
   3  27  -5    0.30    3.40
   2 -27  -5   22.40    4.40
  -2 -27   5   31.00    4.80
  -2  27   5   25.70    4.20
   2  27  -5   26.90    3.90
   1 -27  -5    4.40    3.70
  -1 -27   5    3.80    3.30
  -1  27   5    7.60    3.60
   1  27  -5    2.10    3.60
   0 -27   5    3.40    3.20
   0 -27  -5    5.10    4.10
   0  27   5    1.50    3.10
   0  27  -5    0.50    3.10
   1 -27   5    2.50    3.30
  -1 -27  -5    1.40    4.10
  -1  27  -5   -2.50    3.60
   1  27   5    2.50    3.60
  -2 -27  -5   84.69    7.30
   2 -27   5   84.69    6.50
   2  27   5   87.09    6.70
  -2  27  -5   84.49    6.90
   3 -27   5   91.99    7.20
  -3 -27  -5   87.59    7.50
   3  27   5   92.79    7.60
  -3  27  -5   82.89    6.80
  -4 -27  -5   12.20    5.40
   4  27   5   10.30    4.80
  -4  27  -5    9.70    4.40
   5  27   5   37.80    6.60
  -5  27  -5   32.90    5.60
   6  28  -5   53.89    6.30
  -5 -28   5   13.20    5.00
   5  28  -5   12.50    5.10
  -5  28   5   11.90    5.30
  -4 -28   5    0.00    3.80
   4 -28  -5   -0.30    4.40
   4  28  -5    1.20    3.80
  -4  28   5    2.30    4.00
  -3 -28   5   95.89    7.60
   3 -28  -5  127.89    8.80
  -3  28   5  113.99    7.60
   3  28  -5  120.49    7.80
   2 -28  -5   12.50    4.20
  -2 -28   5   10.50    3.90
   2  28  -5   15.60    3.70
  -2  28   5   18.20    4.00
   1 -28  -5  111.19    7.60
  -1 -28   5   89.79    7.00
   1  28  -5   95.29    7.00
  -1  28   5   92.69    7.30
   0 -28  -5    3.80    4.30
   0 -28   5   -1.90    3.20
   0  28  -5   -3.20    3.10
   0  28   5    0.40    3.50
  -1 -28  -5   -1.40    3.70
   1 -28   5    2.70    3.50
  -1  28  -5    1.70    3.30
   1  28   5   -0.20    3.20
  -2 -28  -5   16.90    5.10
   2 -28   5   26.30    4.30
   2  28   5   17.00    4.10
  -2  28  -5   19.90    4.60
  -3 -28  -5  138.69    9.30
   3 -28   5  137.49    8.70
  -3  28  -5  132.99    8.50
   3  28   5  147.89    8.80
  -4 -28  -5  117.79    9.90
   4  28   5  115.39    9.30
  -4  28  -5  114.79    9.10
   5  28   5  103.19   10.80
  -5 -29   5    5.40    4.50
   5  29  -5    2.40    4.50
  -5  29   5    4.50    4.90
   4 -29  -5   11.90    5.10
  -4 -29   5    9.10    4.30
  -4  29   5    3.80    4.40
   4  29  -5    9.40    4.70
   3 -29  -5   13.90    5.00
  -3 -29   5   10.10    4.40
   3  29  -5   14.80    4.50
  -3  29   5   13.00    4.70
   2 -29  -5    1.60    4.00
  -2 -29   5   -1.60    3.60
   2  29  -5   -4.20    3.80
  -2  29   5   -1.50    3.90
   1 -29  -5   31.70    5.20
  -1 -29   5   41.20    5.40
  -1  29   5   40.50    5.20
   1  29  -5   23.70    4.30
   0 -29  -5    1.60    4.60
   0 -29   5    2.30    3.70
   0  29   5    2.20    3.80
   0  29  -5   -2.80    3.80
  -1 -29  -5   58.29    6.20
   1 -29   5   63.49    6.40
   1  29   5   61.29    6.80
  -1  29  -5   65.69    6.90
  -2 -29  -5  231.98   11.70
   2 -29   5  225.98   10.90
  -2  29  -5  204.18   10.50
   2  29   5  221.38   10.90
  -3 -29  -5    9.10    5.50
   3 -29   5    9.10    4.50
  -3  29  -5    3.50    4.20
   3  29   5    2.10    4.70
  -4 -29  -5   13.60    5.30
  -4  29  -5   10.20    5.40
   4  29   5    8.20    5.20
   5  30  -5   51.19    6.70
   4 -30  -5   16.20    5.60
  -4 -30   5    9.00    5.20
  -4  30   5    9.20    4.90
   4  30  -5    8.00    4.80
  -3 -30   5   16.00    4.60
   3 -30  -5   12.60    5.30
  -3  30   5   14.40    5.00
   3  30  -5   10.00    4.60
   2 -30  -5    2.80    4.30
  -2 -30   5   11.00    5.00
  -2  30   5    3.10    3.70
   2  30  -5    1.50    4.20
   1 -30  -5  161.98    9.90
  -1 -30   5  162.78    9.50
   1  30  -5  157.28    9.30
  -1  30   5  160.38    9.60
   0 -30   5  106.89    8.50
   0 -30  -5  103.69    8.30
   0  30   5  105.29    7.50
   0  30  -5  104.09    7.90
   1 -30   5   70.69    7.50
  -1 -30  -5   60.09    6.60
   1  30   5   61.49    6.10
  -1  30  -5   59.69    6.10
   2 -30   5    2.00    3.90
  -2 -30  -5    2.10    4.70
  -2  30  -5    2.40    4.60
   2  30   5    2.70    4.10
   3 -30   5   -4.30    7.10
  -3 -30  -5    4.80    5.20
   3  30   5    1.40    5.10
  -3  30  -5    1.90    4.40
  -4 -30  -5   16.20    6.80
   4  30   5   17.10    6.20
  -4  30  -5   23.20    5.80
   4 -31  -5   50.99    7.20
  -4  31   5   48.40    6.40
   4  31  -5   49.70    6.20
   3 -31  -5    1.90    5.60
  -3 -31   5    1.40    4.40
  -3  31   5    4.30    4.40
   3  31  -5    1.50    4.60
  -2 -31   5    3.30    4.50
   2 -31  -5    1.70    4.70
   2  31  -5    3.30    4.00
  -2  31   5    0.60    3.90
  -1 -31   5   86.79    7.80
   1 -31  -5   89.69    8.40
   1  31  -5   81.29    6.90
  -1  31   5   85.89    8.00
   0 -31  -5   10.50    4.90
   0 -31   5    7.90    4.50
   0  31   5    9.90    4.80
   0  31  -5    7.00    4.60
   1 -31   5  113.19    8.20
  -1 -31  -5  104.59    9.00
  -1  31  -5   96.49    8.30
   1  31   5  112.39    8.60
  -2 -31  -5   13.70    5.80
   2 -31   5   13.60    5.20
  -2  31  -5   10.40    4.50
   2  31   5   11.10    5.10
   3  31   5   38.20    6.60
  -3  31  -5   30.00    5.90
   4 -32  -5  100.09    9.40
   3 -32  -5    4.60    5.30
  -3  32   5   -2.50    5.20
  -2 -32   5    7.40    5.90
   2 -32  -5    8.60    5.60
   2  32  -5    9.90    6.60
  -2  32   5   17.30    5.20
  -1 -32   5   27.10    5.40
   1 -32  -5   19.10    6.10
   1  32  -5   15.80    5.10
  -1  32   5   15.60    5.20
   0 -32   5  117.89    9.80
   0 -32  -5  118.09    9.40
   0  32  -5  108.69    8.70
   0  32   5  111.79    8.30
  -1 -32  -5    1.10    6.10
   1 -32   5    3.40    5.10
   1  32   5    4.80    4.40
  -1  32  -5    4.20    4.30
   2 -32   5   70.79    7.80
  -2  32  -5   75.39    7.10
   2  32   5   76.89    7.50
  -3  32  -5   73.09    7.40
  -3  33   5   -0.70    5.00
  -2  33   5    2.60    5.40
  -1  33   5   14.20    5.60
   0  33   5    4.60    5.30
  10   0  -6    3.60    4.90
  -9   0   6    0.10    3.90
   9   0  -6    0.70    3.90
  -8   0   6   11.80    3.60
   8   0  -6    9.30    3.20
  -7   0   6    3.60    2.40
   7   0  -6    1.30    2.60
   6   0  -6  198.78    8.40
  -6   0   6  195.78    8.20
   5   0  -6   68.29    4.00
  -5   0   6   84.29    4.00
  -5   0   6   75.99    4.10
  -4   0   6 2496.75   81.99
  -4   0   6 2494.65   82.09
  -4   0   6 2443.66   81.99
  -3   0   6 1014.50   33.70
  -3   0   6 1000.70   33.80
  -3   0   6  996.90   33.70
  -2   0   6  225.38    8.10
  -2   0   6  226.58    8.40
   2   0  -6  211.08    8.00
   1   0  -6 1206.78   39.90
  -1   0   6 1179.68   40.20
  -1   0   6 1211.28   39.90
   0   0   6 1326.77   45.50
   0   0   6 1370.16   45.30
   0   0  -6 1388.46   45.20
   1   0   6 1059.59   36.10
   1   0   6 1105.29   36.00
  -1   0  -6 1058.69   35.80
  -2   0  -6   44.40    2.70
   2   0   6   38.10    2.60
   2   0   6   48.30    3.00
   3   0   6   23.90    2.60
  -3   0  -6   20.50    2.20
   3   0   6   21.60    2.30
   4   0   6  924.91   32.30
  -4   0  -6  924.71   31.90
  -4   0  -6  960.50   31.60
  -5   0  -6  366.56   13.90
   5   0   6  383.16   14.40
  -6   0  -6    9.20    2.70
   6   0   6    5.70    2.90
  -7   0  -6  108.79    6.70
   7   0   6  133.09    7.80
   8   0   6   13.80    5.30
  -8   0  -6   11.40    4.20
  10  -1  -6    2.60    4.80
  10   1  -6    5.30    5.50
  -9  -1   6   30.20    5.00
   9  -1  -6   35.00    5.20
  -9   1   6   30.00    4.60
   9   1  -6   26.90    4.60
  -8  -1   6    6.60    3.10
   8  -1  -6    8.10    3.50
  -8   1   6    6.30    3.00
   8   1  -6    9.30    3.50
  -7  -1   6  100.29    5.90
   7  -1  -6  112.79    6.30
  -7   1   6   95.39    6.00
   7   1  -6  109.69    6.20
  -6  -1   6    4.90    2.40
   6  -1  -6    6.40    2.20
   6   1  -6    4.00    2.00
  -6   1   6    4.40    2.00
   5  -1  -6  257.77    9.90
  -5  -1   6  258.27    9.90
  -5  -1   6  254.97    9.60
   5   1  -6  246.38    9.70
  -5   1   6  262.77    9.80
  -5   1   6  266.37    9.70
  -4  -1   6  102.89    4.70
  -4  -1   6  105.39    4.70
  -4   1   6   94.29    4.70
  -4   1   6  104.39    4.60
  -4   1   6   98.99    4.60
  -3  -1   6  158.48    6.40
  -3  -1   6  160.88    6.30
  -3  -1   6  164.38    6.30
  -3   1   6  161.78    6.50
  -3   1   6  164.88    6.30
  -3   1   6  168.58    6.50
  -2  -1   6  370.06   12.70
   2  -1  -6  363.16   12.70
  -2  -1   6  352.56   13.00
   2   1  -6  365.76   12.80
  -2   1   6  370.16   12.80
  -2   1   6  374.46   13.10
   1  -1  -6  805.72   26.90
  -1  -1   6  811.32   27.00
  -1  -1   6  798.32   27.30
  -1   1   6  785.42   27.30
   1   1  -6  815.62   27.00
  -1   1   6  812.32   27.10
   0  -1  -6  243.68    8.90
   0  -1   6  243.28    9.30
   0  -1   6  269.97    9.00
   0   1   6  245.48    9.30
   0   1   6  261.17    9.10
   0   1  -6  244.78    9.00
   1  -1   6  259.57    9.80
  -1  -1  -6  271.57    9.60
   1  -1   6  283.17    9.80
  -1   1  -6  278.47    9.70
   1   1   6  258.37    9.90
   1   1   6  272.27    9.80
  -2  -1  -6   13.20    1.60
   2  -1   6   11.80    1.60
   2  -1   6    8.90    1.50
   2   1   6   11.50    1.80
   2   1   6    8.20    1.60
  -2   1  -6    8.90    1.60
   3  -1   6  576.94   19.90
  -3  -1  -6  552.44   19.60
  -3  -1  -6  577.74   19.60
   3  -1   6  569.44   19.50
  -3   1  -6  550.54   19.70
   3   1   6  573.64   20.00
   4  -1   6  175.18    7.60
  -4  -1  -6  156.88    7.00
  -4  -1  -6  173.18    6.90
  -4   1  -6  176.98    6.90
  -4   1  -6  177.18    7.20
   4   1   6  170.68    7.70
   5  -1   6   24.90    3.40
  -5  -1  -6   22.50    2.80
   5   1   6   27.30    3.30
  -5   1  -6   25.90    2.90
  -6  -1  -6   28.00    3.50
   6  -1   6   20.40    3.60
   6   1   6   23.20    3.70
  -6   1  -6   19.80    3.10
  -7  -1  -6  103.89    6.80
   7  -1   6  104.99    7.80
   7   1   6  117.49    8.00
  -7   1  -6   95.19    6.40
  -8  -1  -6   46.50    5.30
   8  -1   6   48.20    5.90
   8   1   6   41.90    5.90
  -8   1  -6   44.60    5.00
  10  -2  -6   -0.40    7.80
  10   2  -6    1.70    4.80
  -9  -2   6   22.90    4.40
   9  -2  -6   23.80    4.90
   9   2  -6   12.20    4.30
  -9   2   6   25.20    4.30
   8  -2  -6   68.89    6.00
  -8  -2   6   64.79    5.90
   8   2  -6   69.19    6.00
  -8   2   6   63.49    5.20
  -7  -2   6  228.58    9.80
   7  -2  -6  223.38    9.60
  -7   2   6  226.38    9.40
   7   2  -6  216.28    9.60
   6  -2  -6  169.88    7.30
  -6  -2   6  167.28    7.40
  -6   2   6  151.78    7.00
   6   2  -6  164.28    7.30
  -5  -2   6  258.07    9.80
  -5  -2   6  254.17    9.60
   5  -2  -6  245.88    9.80
   5   2  -6  250.57    9.70
  -5   2   6  260.17    9.60
  -5   2   6  263.37    9.70
  -4  -2   6   94.09    4.40
  -4  -2   6   92.49    4.20
  -4   2   6   88.79    4.40
  -4   2   6   99.29    4.40
   4   2  -6   85.59    4.20
  -4   2   6   91.09    4.20
  -3  -2   6   26.50    2.40
  -3  -2   6   25.30    2.50
  -3  -2   6   31.40    2.20
  -3   2   6   25.50    2.20
  -3   2   6   29.20    2.40
  -3   2   6   30.30    2.50
  -2  -2   6   25.90    2.20
   2  -2  -6   23.40    1.70
  -2  -2   6   26.20    1.90
   2   2  -6   19.10    1.80
  -2   2   6   24.10    2.20
  -2   2   6   29.50    2.30
  -1  -2   6  392.46   13.00
   1  -2  -6  375.36   13.00
  -1  -2   6  359.26   13.40
  -1   2   6  383.96   13.40
   1   2  -6  370.46   13.10
  -1   2   6  386.86   13.30
   0  -2   6   72.79    3.20
   0  -2  -6   71.99    3.10
   0  -2   6   74.29    3.50
   0   2   6   72.69    3.40
   0   2   6   60.39    3.40
   0   2  -6   72.19    3.40
   1  -2   6 2093.79   70.19
  -1  -2  -6 2130.79   70.09
   1  -2   6 2106.49   70.39
   1   2   6 2105.59   70.49
  -1   2  -6 2139.09   70.29
   1   2   6 2180.38   70.49
   2  -2   6  952.50   32.40
  -2  -2  -6  968.30   32.20
   2  -2   6  961.80   32.40
  -2   2  -6  946.11   32.40
   2   2   6  968.30   32.50
   2   2   6  969.60   32.60
  -3  -2  -6   88.29    4.10
   3  -2   6   91.29    4.50
  -3  -2  -6   83.49    4.10
   3  -2   6   78.89    4.00
  -3   2  -6   79.09    4.20
   3   2   6   82.99    4.40
  -4  -2  -6  185.28    7.50
   4  -2   6  192.28    8.00
  -4  -2  -6  186.48    7.40
   4   2   6  192.28    8.20
  -4   2  -6  191.68    7.70
  -5  -2  -6   14.20    2.60
   5  -2   6    9.00    2.90
   5   2   6    9.70    2.70
  -5   2  -6   15.80    2.80
   6  -2   6   46.60    4.70
  -6  -2  -6   48.30    4.20
   6   2   6   42.90    4.90
  -6   2  -6   43.80    4.30
  -7  -2  -6   19.50    3.40
   7  -2   6   14.80    3.90
   7   2   6   11.10    4.00
  -7   2  -6   12.80    3.30
   8  -2   6   56.39    6.40
  -8  -2  -6   56.09    5.60
   8   2   6   58.39    6.40
  -8   2  -6   60.29    6.20
  10   3  -6    2.60    4.90
   9  -3  -6  111.49    7.60
  -9  -3   6  113.19    7.50
  -9   3   6  100.39    7.20
   9   3  -6  116.79    7.50
  -8  -3   6   -0.70    2.90
   8  -3  -6    1.00    3.30
   8   3  -6   -0.10    3.20
  -8   3   6    0.30    3.10
  -7  -3   6  173.68    8.30
   7  -3  -6  181.58    8.60
  -7   3   6  191.78    8.40
   7   3  -6  187.58    8.30
  -6  -3   6  204.58    8.60
   6  -3  -6  211.08    8.90
   6   3  -6  208.38    8.60
  -6   3   6  208.28    8.50
  -5  -3   6  268.77   10.00
  -5  -3   6  242.88   10.20
  -5   3   6  281.77   10.20
   5   3  -6  270.27   10.10
  -5   3   6  272.27   10.40
  -4  -3   6    2.40    1.60
  -4  -3   6    4.70    1.50
  -4   3   6    2.60    1.40
  -4   3   6    3.80    1.60
  -4   3   6    5.80    1.60
   4   3  -6    3.10    1.30
  -3  -3   6   10.70    1.60
  -3  -3   6   10.40    1.40
  -3  -3   6   14.30    1.80
  -3   3   6   10.50    1.70
  -3   3   6   14.10    1.50
  -3   3   6   13.90    1.80
  -2  -3   6  434.36   14.60
  -2  -3   6  423.16   15.00
   2  -3  -6  419.96   14.60
   2   3  -6  425.56   14.80
  -2   3   6  431.76   15.00
  -2   3   6  425.06   15.00
  -1  -3   6  103.39    3.80
   1  -3  -6   93.39    3.70
  -1  -3   6   91.59    4.30
  -1   3   6   95.89    4.20
   1   3  -6   90.89    4.10
  -1   3   6   92.39    4.30
   0  -3   6  227.08    8.40
   0  -3  -6  223.98    7.90
   0  -3   6  232.88    8.00
   0   3   6  217.78    8.40
   0   3  -6  219.18    8.20
   0   3   6  228.08    8.40
  -1  -3  -6    2.10    1.00
   1  -3   6    1.70    1.20
   1  -3   6    3.00    1.10
   1   3   6    0.80    1.20
  -1   3  -6    1.00    1.30
   1   3   6    2.00    1.20
  -2  -3  -6  181.88    6.80
  -2  -3  -6  194.68    7.00
   2  -3   6  182.18    7.00
   2  -3   6  166.28    7.00
   2   3   6  177.28    7.20
  -2   3  -6  174.48    7.00
  -3  -3  -6  175.98    6.70
  -3  -3  -6  180.48    6.80
   3  -3   6  155.48    6.60
   3  -3   6  176.38    7.00
  -3   3  -6  157.68    6.90
   3   3   6  166.28    7.10
   4  -3   6   73.29    4.70
  -4  -3  -6   76.89    4.30
  -4  -3  -6   79.79    4.00
  -4   3  -6   82.99    4.60
   4   3   6   75.39    4.90
   5  -3   6   12.20    3.00
  -5  -3  -6   12.30    2.30
  -5   3  -6   10.30    2.40
   5   3   6   14.90    2.90
  -6  -3  -6   41.50    4.00
   6  -3   6   45.90    4.90
  -6   3  -6   42.90    4.30
   6   3   6   44.10    4.90
   7  -3   6    3.30    3.90
  -7  -3  -6    0.40    3.10
  -7   3  -6   -0.60    3.20
   7   3   6   -3.30    3.50
   8  -3   6    9.90    4.60
  -8  -3  -6    2.20    3.50
   8   3   6    0.60    5.00
  -8   3  -6    2.40    4.10
  10   4  -6   38.80    6.70
   9  -4  -6    2.90    3.80
  -9  -4   6    1.90    4.10
  -9   4   6    0.20    4.00
   9   4  -6    4.90    4.00
   8  -4  -6    2.80    3.30
  -8  -4   6    4.60    3.40
   8   4  -6    2.30    3.30
  -8   4   6    1.60    3.20
   7  -4  -6   78.49    5.60
  -7  -4   6   69.99    5.10
  -7   4   6   66.99    4.80
   7   4  -6   75.29    5.30
  -6  -4   6   88.89    5.00
   6  -4  -6   90.69    5.10
   6   4  -6   88.39    5.00
  -6   4   6   80.39    5.00
  -5  -4   6   93.09    4.60
  -5  -4   6   83.79    4.40
   5  -4  -6   80.09    4.20
   5   4  -6   91.49    4.50
  -5   4   6   88.69    4.50
  -5   4   6   92.39    4.80
  -4  -4   6   26.40    2.50
   4  -4  -6   20.90    2.40
  -4  -4   6   24.40    2.30
   4   4  -6   21.00    2.20
  -4   4   6   28.00    2.40
  -4   4   6   26.10    2.60
  -3  -4   6 1255.57   42.60
  -3  -4   6 1278.87   42.70
  -3   4   6 1269.37   42.70
  -3   4   6 1272.17   42.80
   3   4  -6 1274.07   42.30
  -3   4   6 1291.67   42.40
  -2  -4   6 1001.70   32.90
   2  -4  -6  954.30   32.40
  -2  -4   6 1010.90   32.40
  -2   4   6  958.80   32.80
   2   4  -6  946.91   32.70
  -2   4   6  967.20   32.90
  -1  -4   6   34.60    2.50
   1  -4  -6   30.80    1.80
  -1  -4   6   35.80    1.80
  -1   4   6   34.40    2.50
   1   4  -6   32.80    2.40
  -1   4   6   31.30    2.30
   0  -4  -6  211.58    7.40
   0  -4   6  217.58    7.50
   0  -4   6  204.78    8.00
   0   4   6  205.88    8.00
   0   4  -6  195.98    7.80
   0   4   6  226.18    8.00
   1  -4   6  427.96   15.20
   1  -4   6  430.16   14.90
  -1  -4  -6  439.26   15.20
  -1  -4  -6  435.96   14.70
   1   4   6  432.96   15.30
  -1   4  -6  435.36   15.20
  -2  -4  -6   63.99    3.20
   2  -4   6   69.79    3.50
  -2  -4  -6   75.39    3.60
   2  -4   6   62.99    3.50
   2   4   6   67.99    3.70
  -2   4  -6   64.99    3.50
  -3  -4  -6   15.40    1.80
   3  -4   6   12.80    1.80
   3  -4   6   18.10    2.20
  -3  -4  -6   13.20    1.90
   3   4   6   15.60    2.30
  -3   4  -6   10.10    1.80
  -4  -4  -6  151.88    6.50
   4  -4   6  156.28    7.00
  -4  -4  -6  156.28    6.50
   4   4   6  152.38    7.10
  -4   4  -6  152.48    6.70
   5  -4   6  334.17   13.40
  -5  -4  -6  343.07   12.80
  -5   4  -6  348.57   13.10
   5   4   6  344.57   13.70
  -6  -4  -6  150.28    7.30
   6  -4   6  137.79    7.60
  -6   4  -6  156.68    7.40
   6   4   6  151.18    8.10
  -7  -4  -6    2.00    2.80
   7  -4   6    2.10    3.80
  -7   4  -6   -3.70    2.80
   7   4   6    1.70    3.50
  -8  -4  -6   57.19    5.70
   8  -4   6   60.39    6.70
   8   4   6   46.00    6.30
  -8   4  -6   59.59    6.30
   9  -5  -6   75.59    7.40
  -9  -5   6   63.09    6.40
   9   5  -6   65.69    7.00
  -9   5   6   67.39    7.00
   8  -5  -6   17.10    3.50
  -8  -5   6    8.20    3.30
   8   5  -6   15.10    3.70
  -8   5   6   13.20    3.50
   7  -5  -6  104.79    6.60
  -7  -5   6  109.59    6.10
  -7   5   6  112.59    6.20
   7   5  -6  105.09    6.20
  -6  -5   6  136.29    6.30
   6  -5  -6  115.99    6.20
   6   5  -6  124.69    6.10
  -6   5   6  119.79    6.00
  -5  -5   6  102.59    4.70
   5  -5  -6   90.29    4.50
  -5  -5   6   96.39    5.10
  -5   5   6   98.89    4.70
  -5   5   6   89.49    5.00
   5   5  -6   87.69    4.50
  -4  -5   6  490.55   17.10
  -4  -5   6  479.35   17.00
   4  -5  -6  475.55   16.90
  -4   5   6  494.25   16.80
   4   5  -6  483.35   16.80
  -4   5   6  483.95   17.30
   3  -5  -6  358.76   13.60
  -3  -5   6  380.86   13.70
   3   5  -6  394.16   13.20
  -3   5   6  400.76   13.80
   3   5  -6  379.96   13.60
  -3   5   6  385.76   13.30
   2  -5  -6    2.40    1.30
  -2  -5   6    7.00    1.00
  -2  -5   6    6.30    1.50
   2   5  -6    9.60    1.50
  -2   5   6    7.40    1.10
  -2   5   6    3.70    1.30
   1  -5  -6  207.58    7.30
   1  -5  -6  186.58    7.90
  -1  -5   6  217.38    8.00
  -1  -5   6  217.78    7.30
   1   5  -6  211.98    7.90
  -1   5   6  206.68    7.90
   0  -5  -6   19.70    1.50
   0  -5   6   20.00    2.10
   0  -5  -6   22.20    2.10
   0  -5   6   23.90    1.60
   0   5  -6   24.00    2.10
   0   5   6   22.70    2.30
   1  -5   6  121.79    4.80
   1  -5   6  118.09    5.20
  -1  -5  -6  124.29    5.30
  -1  -5  -6  130.69    4.70
   1   5   6  117.49    5.30
[truncated: 306,457 more chars]
