# Supplementary material
Source: MDPI journal article supplement (https://www.mdpi.com/2073-4352/13/11/1583)
Supplement: s1 [file s1 › Compound 4b.cif]

data_global
_audit_creation_method                  'APEX3 v2018.1-0'

_publ_requested_journal                 ?

_publ_contact_author_name               ?
_publ_contact_author_address            
;


;
_publ_contact_author_email              ?
_publ_contact_author_fax                ?
_publ_contact_author_phone              ?

_publ_section_title                     
;
Crystal structure of piperidinium [3-cyano-5-(ethoxycarbonyl)-6-methyl-4-
[(E)-2-phenylethenyl]pyridin-2-yl]sulfanide
;
_publ_section_abstract                  
;
In the title compound, [C~5~H~12~N][C~18~H~15~N~2~O~2~S], the two ions are 
primarily associated by an N---H...N hydrogen bond. In the crystal, layers 
parallel to the <i>bc</i> plane are formed by pairs of C---H...O and 
N---H...S hydrogen bonds and by C---H...\p(ring) interactions.
;

_publ_section_synopsis
;
The ions in the asymmetric unit are associated through an N---H...N hydrogen 
bond with two such units forming inversion dimers through N---H...S hydrogen 
bonds. Zig-zag chains of dimers extending along the <i>c</i>-axis direction 
are formed by C---H...O hydrogen bonds and C---H...\p(ring) interactions with 
the chains connected into layers parallel to the <i>bc</i> plane by additional 
C---H...\p(ring) interactions.
;

_publ_section_keywords
;
Crystal structure; hydrogen bond; C---H...\p(ring); pyridine; sulfanide
;

_publ_section_references                
;
Brandenburg, K. & Putz, H. (2012). <i>DIAMOND</i>,
Crystal Impact GbR, Bonn, Germany.

Bruker (2016). <i>APEX3</i>, <i>SADABS</i>, <i>SAINT</i>
& <i>SHELXTL</i>, Madison, WI.

Krause, L., Herbst-Irmer, R., Sheldrick G.M. & Stalke D. (2015).  <i>J.
Appl. Cryst.</i> <b>48</b>,  3-10.

Sheldrick, G. M. (2015<i>a</i>). <i>SHELXT</i>. <i>Acta Cryst.</i>
A<b>71</b>, 3-8.

Sheldrick, G. M. (2015<i>b</i>). <i>SHELXL-2018/1</i>.
<i>Acta Cryst.</i> C<b>71</b>, 3-8.
;

_publ_manuscript_text
;
The dihedral angle between the N1/C1...C5 and C9...C14 rings is 
48.62(5)\% while the piperidinium cation adopts a chair conformation. 
In the crystal two formula units form inversion dimers through 
N3---H3B...N1 and N3---H3A...S1 hydrogen bonds (Table 2 and Fig. 2). 
The dimers are connected into zig-zag chains extending along the 
<i>c</i>-axis direction by inversion-related C19---H19B...O1 and 
C23---H23B...O1 hydrogen bonds as well as C21---H21B...Cg2 interactions 
(Table 2 and Fig. 2). Finally, the chains are connected into layers 
parallel to the <i>bc</i> plane by inversion-related C14---H14...Cg1 
interactions (Table 2 and Figs. 2 and 3).
;

_publ_section_exptl_refinement
;
Crystal and refinement details are presented in Table 1.
;

_publ_section_exptl_prep
;

;

_publ_section_figure_captions
;
Figure 1. The title molecule with labeling scheme and 50% probability 
ellipsoids. The interionic hydrogen bond is shown by a dashed line.

Figure 2. Detail of the interionic interactions. N---H...N, C---H...O 
and N---H...S hydrogen bonds are depicted, respectively, by dark blue, 
black and light blue dashed lines. The C---H...\p(ring) interactions 
are shown by green dashed lines.

Figure 3. Packing viewed along the <i>a</i>-axis direction with 
interionic interactions shown as in Fig. 2.
;


_publ_section_acknowledgements
;
JTM thanks Tulane University for support of the Tulane Crystallography 
Laboratory.
;
 
data_SKM265_0m_a
 
_audit_creation_method            'SHELXL-2018/1'
_shelx_SHELXL_version_number      '2018/1'
_chemical_name_systematic         
;
piperidinium [3-cyano-5-(ethoxycarbonyl)-6-methyl-4-
[(E)-2-phenylethenyl]pyridin-2-yl]sulfanide
;
_chemical_name_common             ?
_chemical_melting_point           ?
_chemical_formula_moiety          'C18 H15 N2 O2 S, C5 H12 N'
_chemical_formula_sum
 'C23 H27 N3 O2 S' 
_chemical_formula_weight          409.53

loop_
 _atom_type_symbol
 _atom_type_description
 _atom_type_scat_dispersion_real
 _atom_type_scat_dispersion_imag
 _atom_type_scat_source
 'C'  'C'   0.0033   0.0016
 'International Tables Vol C Tables 4.2.6.8 and 6.1.1.4'
 'H'  'H'   0.0000   0.0000
 'International Tables Vol C Tables 4.2.6.8 and 6.1.1.4'
 'N'  'N'   0.0061   0.0033
 'International Tables Vol C Tables 4.2.6.8 and 6.1.1.4'
 'O'  'O'   0.0106   0.0060
 'International Tables Vol C Tables 4.2.6.8 and 6.1.1.4'
 'S'  'S'   0.1246   0.1234
 'International Tables Vol C Tables 4.2.6.8 and 6.1.1.4'
 
_space_group_crystal_system       triclinic
_space_group_IT_number            2
_space_group_name_H-M_alt         'P -1'
_space_group_name_Hall            '-P 1'
 
_shelx_space_group_comment
;
The symmetry employed for this shelxl refinement is uniquely defined
by the following loop, which should always be used as a source of
symmetry information in preference to the above space-group names.
They are only intended as comments.
;
 
loop_
 _space_group_symop_operation_xyz
 'x, y, z'
 '-x, -y, -z'
 
_cell_length_a                    10.0768(4)
_cell_length_b                    10.4188(4)
_cell_length_c                    11.3759(5)
_cell_angle_alpha                 78.519(1)
_cell_angle_beta                  82.891(1)
_cell_angle_gamma                 65.707(1)
_cell_volume                      1065.63(8)
_cell_formula_units_Z             2
_cell_measurement_reflns_used     9973
_cell_measurement_theta_min       2.1740
_cell_measurement_theta_max       29.1703
_cell_measurement_temperature     120(2)

_exptl_crystal_description        'thick plate'
_exptl_crystal_colour             yellow
_exptl_crystal_density_meas       ?
_exptl_crystal_density_method     'not measured'
_exptl_crystal_density_diffrn     1.276          
_exptl_crystal_F_000              436
_exptl_transmission_factor_min    0.821
_exptl_transmission_factor_max    0.901
_exptl_crystal_size_max           0.302
_exptl_crystal_size_mid           0.270
_exptl_crystal_size_min           0.167
_exptl_absorpt_coefficient_mu     0.176
_shelx_estimated_absorpt_T_min    0.949
_shelx_estimated_absorpt_T_max    0.971
_exptl_absorpt_correction_type    multi-scan
_exptl_absorpt_process_details          
    '<i>SADABS</i> (Krause <i>et al.</i>, 2015)'
_exptl_absorpt_correction_T_min   0.82
_exptl_absorpt_correction_T_max   0.90

_exptl_special_details                  
;

The diffraction data were obtained from 3 sets of 400 frames,
each of width 0.5\% in \w, colllected at \f = 0.00,
90.00 and 180.00\% and 2 sets of 800 frames, each of
width 0.45\% in \f, collected at \w = --30.00 and 210.00\%.
The scan time was 10 sec/frame.
; 

_diffrn_ambient_temperature       120(2)
_diffrn_radiation_wavelength      0.71073
_diffrn_radiation_type            MoK\a
_diffrn_source                    'fine-focus sealed tube'
_diffrn_radiation_monochromator   graphite

_diffrn_measurement_device_type   'Bruker Smart APEX CCD'
_diffrn_measurement_method        '\f and \w scans'

_diffrn_detector_area_resol_mean  8.3333

_diffrn_reflns_number             20787
_diffrn_reflns_av_unetI/netI      0.0256
_diffrn_reflns_av_R_equivalents   0.0251
_diffrn_reflns_limit_h_min        -13
_diffrn_reflns_limit_h_max        13
_diffrn_reflns_limit_k_min        -14
_diffrn_reflns_limit_k_max        14
_diffrn_reflns_limit_l_min        -15
_diffrn_reflns_limit_l_max        15
_diffrn_reflns_theta_min          1.829
_diffrn_reflns_theta_max          29.187
_diffrn_reflns_theta_full         28.500
_diffrn_measured_fraction_theta_max   0.982
_diffrn_measured_fraction_theta_full  0.994
_diffrn_reflns_Laue_measured_fraction_max    0.982
_diffrn_reflns_Laue_measured_fraction_full   0.994
_diffrn_reflns_point_group_measured_fraction_max   0.982
_diffrn_reflns_point_group_measured_fraction_full  0.994
_reflns_number_total              5673
_reflns_number_gt                 4716
_reflns_threshold_expression      'I > 2\s(I)'
_reflns_Friedel_coverage          0.000
_reflns_Friedel_fraction_max      .
_reflns_Friedel_fraction_full     .
 
_reflns_special_details
;
 Reflections were merged by SHELXL according to the crystal
 class for the calculation of statistics and refinement.
 
 _reflns_Friedel_fraction is defined as the number of unique
 Friedel pairs measured divided by the number that would be
 possible theoretically, ignoring centric projections and
 systematic absences.
;
 
_computing_data_collection        '<i>APEX3</i> (Bruker, 2016)'
_computing_cell_refinement        '<i>SAINT</i> (Bruker, 2016)'
_computing_data_reduction         '<i>SAINT</i> (Bruker, 2016)'
_computing_structure_solution           
    '<i>SHELXT</i> (Sheldrick, 2015<i>a</i>)'
_computing_structure_refinement         
    '<i>SHELXL-2018/1</i> (Sheldrick, 2015<i>b</i>)'
_computing_molecular_graphics           
    '<i>DIAMOND</i> (Brandenburg & Putz, 2012)'
_computing_publication_material   '<i>SHELXTL</i> (Bruker, 2016)'

_refine_special_details                 
;
Refinement of F^2^ against ALL reflections.  The weighted R-factor wR and
goodness of fit S are based on F^2^, conventional R-factors R are based
on F, with F set to zero for negative F^2^. The threshold expression of
F^2^ > 2sigma(F^2^) is used only for calculating R-factors(gt) etc. and is
not relevant to the choice of reflections for refinement.  R-factors based
on F^2^ are statistically about twice as large as those based on F, and R-
factors based on ALL data will be even larger.
;

_refine_ls_structure_factor_coef  Fsqd
_refine_ls_matrix_type            full
_refine_ls_weighting_scheme       calc
_refine_ls_weighting_details
'w=1/[\s^2^(Fo^2^)+(0.0775P)^2^] where P=(Fo^2^+2Fc^2^)/3'
_atom_sites_solution_primary      direct
_atom_sites_solution_secondary    difmap
_atom_sites_solution_hydrogens    difmap
_refine_ls_hydrogen_treatment     refall
_refine_ls_extinction_method      none
_refine_ls_extinction_coef        .
_refine_ls_number_reflns          5673
_refine_ls_number_parameters      370
_refine_ls_number_restraints      0
_refine_ls_R_factor_all           0.0456
_refine_ls_R_factor_gt            0.0390
_refine_ls_wR_factor_ref          0.1154
_refine_ls_wR_factor_gt           0.1120
_refine_ls_goodness_of_fit_ref    1.114
_refine_ls_restrained_S_all       1.114
_refine_ls_shift/su_max           0.001
_refine_ls_shift/su_mean          0.000
 
loop_
 _atom_site_label
 _atom_site_type_symbol
 _atom_site_fract_x
 _atom_site_fract_y
 _atom_site_fract_z
 _atom_site_U_iso_or_equiv
 _atom_site_adp_type
 _atom_site_occupancy
 _atom_site_site_symmetry_order  
 _atom_site_calc_flag
 _atom_site_refinement_flags_posn
 _atom_site_refinement_flags_adp
 _atom_site_refinement_flags_occupancy
 _atom_site_disorder_assembly
 _atom_site_disorder_group
S1 S 0.28829(3) 0.58342(3) 0.12326(2) 0.01880(9) Uani 1 1 d . . . . .
O1 O 0.51464(9) 0.25709(9) 0.68170(7) 0.02372(19) Uani 1 1 d . . . . .
O2 O 0.68288(8) 0.11676(9) 0.56206(7) 0.02236(18) Uani 1 1 d . . . . .
N1 N 0.50178(9) 0.45902(9) 0.27700(8) 0.01567(19) Uani 1 1 d . . . . .
N2 N 0.02172(11) 0.45689(12) 0.31089(10) 0.0307(3) Uani 1 1 d . . . . .
C1 C 0.36461(11) 0.47968(11) 0.25509(9) 0.0149(2) Uani 1 1 d . . . . .
C2 C 0.28522(11) 0.41807(11) 0.34352(9) 0.0160(2) Uani 1 1 d . . . . .
C3 C 0.34763(11) 0.33367(11) 0.45112(9) 0.0155(2) Uani 1 1 d . . . . .
C4 C 0.48998(11) 0.31445(11) 0.46848(9) 0.0154(2) Uani 1 1 d . . . . .
C5 C 0.56229(11) 0.38034(11) 0.38033(9) 0.0159(2) Uani 1 1 d . . . . .
C6 C 0.13937(12) 0.44115(12) 0.32243(10) 0.0204(2) Uani 1 1 d . . . . .
C7 C 0.26242(12) 0.27025(12) 0.54006(9) 0.0181(2) Uani 1 1 d . . . . .
H7 H 0.1654(19) 0.3289(17) 0.5554(14) 0.038(4) Uiso 1 1 d . . . . .
C8 C 0.31679(12) 0.13627(12) 0.59915(9) 0.0185(2) Uani 1 1 d . . . . .
H8 H 0.4162(17) 0.0792(16) 0.5824(13) 0.029(4) Uiso 1 1 d . . . . .
C9 C 0.23954(12) 0.06840(12) 0.69101(9) 0.0174(2) Uani 1 1 d . . . . .
C10 C 0.09733(12) 0.14179(12) 0.73500(10) 0.0208(2) Uani 1 1 d . . . . .
H10 H 0.0469(15) 0.2425(15) 0.7064(11) 0.020(3) Uiso 1 1 d . . . . .
C11 C 0.03077(13) 0.07215(13) 0.82270(10) 0.0237(2) Uani 1 1 d . . . . .
H11 H -0.0672(16) 0.1293(15) 0.8483(12) 0.026(4) Uiso 1 1 d . . . . .
C12 C 0.10401(13) -0.07165(13) 0.86823(10) 0.0234(2) Uani 1 1 d . . . . .
H12 H 0.0587(15) -0.1153(15) 0.9280(13) 0.026(4) Uiso 1 1 d . . . . .
C13 C 0.24447(13) -0.14554(13) 0.82621(10) 0.0224(2) Uani 1 1 d . . . . .
H13 H 0.2980(15) -0.2472(16) 0.8557(13) 0.030(4) Uiso 1 1 d . . . . .
C14 C 0.31219(13) -0.07602(12) 0.73875(10) 0.0194(2) Uani 1 1 d . . . . .
H14 H 0.4107(17) -0.1258(16) 0.7076(13) 0.031(4) Uiso 1 1 d . . . . .
C15 C 0.56134(11) 0.22947(11) 0.58304(9) 0.0168(2) Uani 1 1 d . . . . .
C16 C 0.75557(14) 0.02211(16) 0.66915(12) 0.0328(3) Uani 1 1 d . . . . .
H16A H 0.7575(16) 0.0810(17) 0.7245(13) 0.033(4) Uiso 1 1 d . . . . .
H16B H 0.691(2) -0.022(2) 0.7095(19) 0.077(7) Uiso 1 1 d . . . . .
C17 C 0.90034(15) -0.08116(15) 0.63049(13) 0.0332(3) Uani 1 1 d . . . . .
H17A H 0.892(2) -0.123(2) 0.5704(18) 0.061(6) Uiso 1 1 d . . . . .
H17B H 0.970(2) -0.025(2) 0.5978(16) 0.058(5) Uiso 1 1 d . . . . .
H17C H 0.9461(18) -0.1500(18) 0.7043(15) 0.046(5) Uiso 1 1 d . . . . .
N3 N 0.62393(10) 0.61899(10) 0.08363(8) 0.01743(19) Uani 1 1 d . . . . .
H3A H 0.6387(15) 0.5646(15) 0.0289(13) 0.024(3) Uiso 1 1 d . . . . .
H3B H 0.5763(17) 0.5775(17) 0.1516(14) 0.038(4) Uiso 1 1 d . . . . .
C18 C 0.71190(12) 0.37041(13) 0.39708(11) 0.0212(2) Uani 1 1 d . . . . .
H18A H 0.7828(18) 0.2989(18) 0.3587(14) 0.041(4) Uiso 1 1 d . . . . .
H18B H 0.7302(17) 0.3540(16) 0.4842(15) 0.039(4) Uiso 1 1 d . . . . .
H18C H 0.7160(15) 0.4654(16) 0.3615(12) 0.026(4) Uiso 1 1 d . . . . .
C19 C 0.52939(12) 0.77044(12) 0.03671(10) 0.0199(2) Uani 1 1 d . . . . .
H19A H 0.4420(17) 0.7684(17) 0.0070(14) 0.035(4) Uiso 1 1 d . . . . .
H19B H 0.5014(15) 0.8221(16) 0.1072(13) 0.027(3) Uiso 1 1 d . . . . .
C20 C 0.61073(12) 0.83149(12) -0.06454(10) 0.0201(2) Uani 1 1 d . . . . .
H20A H 0.6319(16) 0.7775(16) -0.1310(13) 0.028(4) Uiso 1 1 d . . . . .
H20B H 0.5467(16) 0.9291(17) -0.0942(13) 0.032(4) Uiso 1 1 d . . . . .
C21 C 0.75203(13) 0.82288(13) -0.02171(11) 0.0235(2) Uani 1 1 d . . . . .
H21A H 0.7959(17) 0.8655(17) -0.0868(14) 0.033(4) Uiso 1 1 d . . . . .
H21B H 0.7304(16) 0.8853(16) 0.0451(14) 0.032(4) Uiso 1 1 d . . . . .
C22 C 0.84725(12) 0.66784(13) 0.02598(10) 0.0228(2) Uani 1 1 d . . . . .
H22A H 0.8790(16) 0.6083(16) -0.0386(14) 0.031(4) Uiso 1 1 d . . . . .
H22B H 0.9363(15) 0.6619(14) 0.0595(12) 0.021(3) Uiso 1 1 d . . . . .
C23 C 0.76592(12) 0.60288(13) 0.12500(10) 0.0206(2) Uani 1 1 d . . . . .
H23A H 0.8204(15) 0.4972(15) 0.1537(12) 0.023(3) Uiso 1 1 d . . . . .
H23B H 0.7371(15) 0.6512(16) 0.2040(13) 0.028(4) Uiso 1 1 d . . . . .
 
loop_
 _atom_site_aniso_label
 _atom_site_aniso_U_11
 _atom_site_aniso_U_22
 _atom_site_aniso_U_33
 _atom_site_aniso_U_23
 _atom_site_aniso_U_13
 _atom_site_aniso_U_12
S1 0.02033(15) 0.01825(15) 0.01561(14) 0.00205(10) -0.00349(10) -0.00692(11)
O1 0.0270(4) 0.0285(5) 0.0157(4) -0.0043(3) -0.0010(3) -0.0108(4)
O2 0.0199(4) 0.0231(4) 0.0156(4) 0.0029(3) -0.0029(3) -0.0023(3)
N1 0.0154(4) 0.0142(4) 0.0166(4) -0.0014(3) -0.0010(3) -0.0055(3)
N2 0.0231(5) 0.0352(6) 0.0319(6) 0.0083(5) -0.0083(4) -0.0141(5)
C1 0.0165(5) 0.0120(5) 0.0156(5) -0.0026(4) -0.0004(4) -0.0051(4)
C2 0.0155(5) 0.0151(5) 0.0168(5) -0.0009(4) -0.0015(4) -0.0060(4)
C3 0.0168(5) 0.0134(5) 0.0155(5) -0.0022(4) -0.0001(4) -0.0053(4)
C4 0.0172(5) 0.0145(5) 0.0144(5) -0.0022(4) -0.0014(4) -0.0061(4)
C5 0.0167(5) 0.0144(5) 0.0162(5) -0.0028(4) -0.0008(4) -0.0059(4)
C6 0.0202(5) 0.0198(5) 0.0191(5) 0.0035(4) -0.0026(4) -0.0084(4)
C7 0.0155(5) 0.0210(5) 0.0176(5) -0.0010(4) 0.0001(4) -0.0084(4)
C8 0.0181(5) 0.0200(5) 0.0184(5) -0.0032(4) 0.0010(4) -0.0090(4)
C9 0.0209(5) 0.0186(5) 0.0149(5) -0.0021(4) -0.0016(4) -0.0102(4)
C10 0.0215(5) 0.0204(6) 0.0202(5) -0.0022(4) -0.0006(4) -0.0087(5)
C11 0.0217(6) 0.0294(6) 0.0212(5) -0.0052(5) 0.0030(4) -0.0122(5)
C12 0.0308(6) 0.0284(6) 0.0167(5) -0.0017(4) 0.0019(4) -0.0193(5)
C13 0.0318(6) 0.0197(6) 0.0176(5) -0.0004(4) -0.0025(4) -0.0130(5)
C14 0.0221(5) 0.0191(5) 0.0177(5) -0.0031(4) -0.0008(4) -0.0088(4)
C15 0.0171(5) 0.0189(5) 0.0166(5) -0.0008(4) -0.0018(4) -0.0102(4)
C16 0.0261(6) 0.0371(7) 0.0218(6) 0.0109(5) -0.0081(5) -0.0044(6)
C17 0.0328(7) 0.0273(7) 0.0320(7) -0.0006(5) -0.0133(6) -0.0030(6)
N3 0.0181(4) 0.0184(5) 0.0158(4) 0.0006(4) -0.0016(3) -0.0086(4)
C18 0.0181(5) 0.0245(6) 0.0223(5) -0.0014(4) -0.0032(4) -0.0103(5)
C19 0.0190(5) 0.0188(5) 0.0191(5) 0.0017(4) -0.0027(4) -0.0065(4)
C20 0.0234(6) 0.0189(5) 0.0167(5) 0.0022(4) -0.0030(4) -0.0089(5)
C21 0.0254(6) 0.0261(6) 0.0220(5) 0.0028(5) -0.0018(4) -0.0160(5)
C22 0.0184(5) 0.0278(6) 0.0218(5) 0.0002(5) -0.0009(4) -0.0105(5)
C23 0.0186(5) 0.0238(6) 0.0185(5) 0.0029(4) -0.0039(4) -0.0096(5)
 
_geom_special_details
;
 All esds (except the esd in the dihedral angle between two l.s. planes)
 are estimated using the full covariance matrix.  The cell esds are taken
 into account individually in the estimation of esds in distances, angles
 and torsion angles; correlations between esds in cell parameters are only
 used when they are defined by crystal symmetry.  An approximate (isotropic)
 treatment of cell esds is used for estimating esds involving l.s. planes.
;
 
loop_
 _geom_bond_atom_site_label_1
 _geom_bond_atom_site_label_2
 _geom_bond_distance
 _geom_bond_site_symmetry_2
 _geom_bond_publ_flag
S1 C1 1.7219(10) . ?
O1 C15 1.2044(13) . ?
O2 C15 1.3386(14) . ?
O2 C16 1.4633(13) . ?
N1 C5 1.3446(13) . ?
N1 C1 1.3558(13) . ?
N2 C6 1.1488(15) . ?
C1 C2 1.4248(14) . ?
C2 C3 1.4051(14) . ?
C2 C6 1.4313(15) . ?
C3 C4 1.3982(14) . ?
C3 C7 1.4775(14) . ?
C4 C5 1.4016(14) . ?
C4 C15 1.4993(13) . ?
C5 C18 1.5015(15) . ?
C7 C8 1.3375(15) . ?
C7 H7 0.932(17) . ?
C8 C9 1.4681(15) . ?
C8 H8 0.949(15) . ?
C9 C14 1.4006(15) . ?
C9 C10 1.4007(16) . ?
C10 C11 1.3851(16) . ?
C10 H10 0.965(14) . ?
C11 C12 1.3905(17) . ?
C11 H11 0.963(15) . ?
C12 C13 1.3810(18) . ?
C12 H12 0.921(14) . ?
C13 C14 1.3900(15) . ?
C13 H13 0.979(15) . ?
C14 H14 0.971(16) . ?
C16 C17 1.489(2) . ?
C16 H16A 0.970(16) . ?
C16 H16B 0.97(2) . ?
C17 H17A 0.91(2) . ?
C17 H17B 1.07(2) . ?
C17 H17C 1.008(17) . ?
N3 C23 1.4949(14) . ?
N3 C19 1.4954(14) . ?
N3 H3A 0.883(15) . ?
N3 H3B 0.980(16) . ?
C18 H18A 0.933(17) . ?
C18 H18B 0.999(16) . ?
C18 H18C 1.007(15) . ?
C19 C20 1.5188(15) . ?
C19 H19A 0.991(16) . ?
C19 H19B 1.001(15) . ?
C20 C21 1.5239(16) . ?
C20 H20A 0.983(15) . ?
C20 H20B 0.971(15) . ?
C21 C22 1.5261(17) . ?
C21 H21A 0.944(16) . ?
C21 H21B 1.043(15) . ?
C22 C23 1.5241(15) . ?
C22 H22A 0.994(15) . ?
C22 H22B 0.992(13) . ?
C23 H23A 1.012(14) . ?
C23 H23B 1.068(14) . ?
 
loop_
 _geom_angle_atom_site_label_1
 _geom_angle_atom_site_label_2
 _geom_angle_atom_site_label_3
 _geom_angle
 _geom_angle_site_symmetry_1
 _geom_angle_site_symmetry_3
 _geom_angle_publ_flag
C15 O2 C16 115.36(9) . . ?
C5 N1 C1 120.34(9) . . ?
N1 C1 C2 119.07(9) . . ?
N1 C1 S1 119.48(8) . . ?
C2 C1 S1 121.42(8) . . ?
C3 C2 C1 121.32(9) . . ?
C3 C2 C6 119.04(9) . . ?
C1 C2 C6 119.64(9) . . ?
C4 C3 C2 117.22(9) . . ?
C4 C3 C7 123.04(9) . . ?
C2 C3 C7 119.74(9) . . ?
C3 C4 C5 119.38(9) . . ?
C3 C4 C15 119.95(9) . . ?
C5 C4 C15 120.61(9) . . ?
N1 C5 C4 122.63(9) . . ?
N1 C5 C18 115.59(9) . . ?
C4 C5 C18 121.77(9) . . ?
N2 C6 C2 176.86(11) . . ?
C8 C7 C3 123.96(10) . . ?
C8 C7 H7 119.2(9) . . ?
C3 C7 H7 116.8(9) . . ?
C7 C8 C9 126.64(10) . . ?
C7 C8 H8 117.5(9) . . ?
C9 C8 H8 115.8(9) . . ?
C14 C9 C10 118.25(10) . . ?
C14 C9 C8 118.58(10) . . ?
C10 C9 C8 123.16(10) . . ?
C11 C10 C9 120.46(11) . . ?
C11 C10 H10 119.7(8) . . ?
C9 C10 H10 119.8(8) . . ?
C10 C11 C12 120.51(11) . . ?
C10 C11 H11 115.8(8) . . ?
C12 C11 H11 123.7(8) . . ?
C13 C12 C11 119.81(10) . . ?
C13 C12 H12 121.0(9) . . ?
C11 C12 H12 119.1(9) . . ?
C12 C13 C14 119.95(11) . . ?
C12 C13 H13 121.5(8) . . ?
C14 C13 H13 118.5(8) . . ?
C13 C14 C9 121.01(11) . . ?
C13 C14 H14 121.4(9) . . ?
C9 C14 H14 117.6(9) . . ?
O1 C15 O2 124.01(9) . . ?
O1 C15 C4 124.66(10) . . ?
O2 C15 C4 111.32(9) . . ?
O2 C16 C17 108.28(10) . . ?
O2 C16 H16A 108.0(9) . . ?
C17 C16 H16A 115.7(9) . . ?
O2 C16 H16B 106.4(12) . . ?
C17 C16 H16B 113.9(13) . . ?
H16A C16 H16B 104.0(15) . . ?
C16 C17 H17A 111.3(13) . . ?
C16 C17 H17B 109.0(10) . . ?
H17A C17 H17B 108.2(16) . . ?
C16 C17 H17C 107.5(9) . . ?
H17A C17 H17C 114.5(16) . . ?
H17B C17 H17C 106.2(14) . . ?
C23 N3 C19 112.87(9) . . ?
C23 N3 H3A 110.6(9) . . ?
C19 N3 H3A 110.2(9) . . ?
C23 N3 H3B 107.0(9) . . ?
C19 N3 H3B 112.0(9) . . ?
H3A N3 H3B 103.7(13) . . ?
C5 C18 H18A 110.7(10) . . ?
C5 C18 H18B 110.8(9) . . ?
H18A C18 H18B 111.1(13) . . ?
C5 C18 H18C 107.9(8) . . ?
H18A C18 H18C 109.7(13) . . ?
H18B C18 H18C 106.5(12) . . ?
N3 C19 C20 109.89(9) . . ?
N3 C19 H19A 106.3(9) . . ?
C20 C19 H19A 110.6(9) . . ?
N3 C19 H19B 106.1(8) . . ?
C20 C19 H19B 113.5(8) . . ?
H19A C19 H19B 110.1(12) . . ?
C19 C20 C21 110.75(9) . . ?
C19 C20 H20A 108.8(8) . . ?
C21 C20 H20A 110.1(8) . . ?
C19 C20 H20B 108.3(9) . . ?
C21 C20 H20B 111.8(9) . . ?
H20A C20 H20B 107.1(12) . . ?
C20 C21 C22 109.62(10) . . ?
C20 C21 H21A 107.2(9) . . ?
C22 C21 H21A 114.0(9) . . ?
C20 C21 H21B 110.7(8) . . ?
C22 C21 H21B 110.0(8) . . ?
H21A C21 H21B 105.3(13) . . ?
C23 C22 C21 111.14(10) . . ?
C23 C22 H22A 108.1(8) . . ?
C21 C22 H22A 111.5(9) . . ?
C23 C22 H22B 108.2(8) . . ?
C21 C22 H22B 110.2(8) . . ?
H22A C22 H22B 107.5(11) . . ?
N3 C23 C22 111.10(9) . . ?
N3 C23 H23A 105.9(8) . . ?
C22 C23 H23A 114.3(8) . . ?
N3 C23 H23B 104.4(8) . . ?
C22 C23 H23B 114.8(8) . . ?
H23A C23 H23B 105.5(11) . . ?
 
loop_
 _geom_torsion_atom_site_label_1
 _geom_torsion_atom_site_label_2
 _geom_torsion_atom_site_label_3
 _geom_torsion_atom_site_label_4
 _geom_torsion
 _geom_torsion_site_symmetry_1
 _geom_torsion_site_symmetry_2
 _geom_torsion_site_symmetry_3
 _geom_torsion_site_symmetry_4
 _geom_torsion_publ_flag
C5 N1 C1 C2 0.61(15) . . . . ?
C5 N1 C1 S1 178.88(8) . . . . ?
N1 C1 C2 C3 -1.66(15) . . . . ?
S1 C1 C2 C3 -179.89(8) . . . . ?
N1 C1 C2 C6 178.91(10) . . . . ?
S1 C1 C2 C6 0.68(14) . . . . ?
C1 C2 C3 C4 0.91(15) . . . . ?
C6 C2 C3 C4 -179.65(10) . . . . ?
C1 C2 C3 C7 -179.31(10) . . . . ?
C6 C2 C3 C7 0.13(15) . . . . ?
C2 C3 C4 C5 0.80(15) . . . . ?
C7 C3 C4 C5 -178.97(10) . . . . ?
C2 C3 C4 C15 178.05(9) . . . . ?
C7 C3 C4 C15 -1.72(16) . . . . ?
C1 N1 C5 C4 1.15(16) . . . . ?
C1 N1 C5 C18 -177.31(9) . . . . ?
C3 C4 C5 N1 -1.89(16) . . . . ?
C15 C4 C5 N1 -179.12(9) . . . . ?
C3 C4 C5 C18 176.48(10) . . . . ?
C15 C4 C5 C18 -0.75(16) . . . . ?
C4 C3 C7 C8 -43.08(16) . . . . ?
C2 C3 C7 C8 137.15(11) . . . . ?
C3 C7 C8 C9 177.96(10) . . . . ?
C7 C8 C9 C14 176.62(11) . . . . ?
C7 C8 C9 C10 -4.60(18) . . . . ?
C14 C9 C10 C11 -0.53(16) . . . . ?
C8 C9 C10 C11 -179.31(10) . . . . ?
C9 C10 C11 C12 -0.10(17) . . . . ?
C10 C11 C12 C13 0.33(17) . . . . ?
C11 C12 C13 C14 0.07(17) . . . . ?
C12 C13 C14 C9 -0.72(16) . . . . ?
C10 C9 C14 C13 0.94(16) . . . . ?
C8 C9 C14 C13 179.78(10) . . . . ?
C16 O2 C15 O1 2.48(16) . . . . ?
C16 O2 C15 C4 -176.37(10) . . . . ?
C3 C4 C15 O1 -58.55(15) . . . . ?
C5 C4 C15 O1 118.67(12) . . . . ?
C3 C4 C15 O2 120.30(10) . . . . ?
C5 C4 C15 O2 -62.48(13) . . . . ?
C15 O2 C16 C17 -170.07(11) . . . . ?
C23 N3 C19 C20 56.56(12) . . . . ?
N3 C19 C20 C21 -57.99(12) . . . . ?
C19 C20 C21 C22 58.13(13) . . . . ?
C20 C21 C22 C23 -55.98(13) . . . . ?
C19 N3 C23 C22 -54.88(13) . . . . ?
C21 C22 C23 N3 54.21(13) . . . . ?
 
loop_
 _geom_hbond_atom_site_label_D 
 _geom_hbond_atom_site_label_H 
 _geom_hbond_atom_site_label_A 
 _geom_hbond_distance_DH 
 _geom_hbond_distance_HA 
 _geom_hbond_distance_DA 
 _geom_hbond_angle_DHA 
 _geom_hbond_site_symmetry_A 
 _geom_hbond_publ_flag
N3 H3A S1  0.883(15) 2.393(15) 3.2702(10) 172.1(12) 2_665 yes
N3 H3B N1  0.980(16) 1.980(17) 2.9479(12) 169.0(14) . yes
C14 H14 Cg1 0.971(16) 2.848(15) 3.6112(13) 136.2(13) 2_656 yes
C19 H19B O1  1.001(15) 2.387(15) 3.1508(14) 132.4(11) 2_666 yes
C21 H21B Cg2 1.043(15) 2.972(16) 3.9189(14) 151.4(13) 2_666 yes
C23 H23B O1  1.068(14) 2.592(14) 3.3617(14) 128.4(10) 2_666 yes
_iucr_geom_hbonds_special_details
;
Cg1 and Cg2 are, respectively the centroids of the N1/C1...C5 and 
C9...C14 rings.
;
 
_refine_diff_density_max    0.490
_refine_diff_density_min   -0.224
_refine_diff_density_rms    0.060

_shelx_res_file
;
TITL SKM265_0m_a.res in P-1
    SKM265_0m_a.res
    created by SHELXL-2018/1 at 09:20:28 on 24-Oct-2018
REM Old TITL SKM265_0m in P-1
REM SHELXT solution in P-1
REM R1 0.100,  Rweak 0.003,  Alpha 0.039,  Orientation as input
REM Formula found by SHELXT:  C23 N3 O2 S
CELL  0.71073  10.0768  10.4188  11.3759   78.519   82.891   65.707
ZERR    2.000   0.0004   0.0004   0.0005    0.001    0.001    0.001
LATT  1
SFAC C H N O S
UNIT 46 54 6 4 2
TEMP -153
SIZE 0.167 0.27 0.302
L.S. 5
BOND $H
LIST 4
FMAP 2
PLAN 5
CONF
EQIV $1 -x+1, -y+1, -z
HTAB N3 S1_$1
EQIV $2 -x+1, -y+1, -z+1
HTAB N3 N1
HTAB C19 O1_$2
HTAB C23 O1_$2
ACTA 57
WGHT    0.077500
FVAR       0.48811
S1    5    0.288293    0.583417    0.123258    11.00000    0.02033    0.01825 =
         0.01561    0.00205   -0.00349   -0.00692
O1    4    0.514635    0.257089    0.681705    11.00000    0.02695    0.02855 =
         0.01570   -0.00432   -0.00099   -0.01078
O2    4    0.682882    0.116764    0.562059    11.00000    0.01993    0.02307 =
         0.01565    0.00286   -0.00291   -0.00230
N1    3    0.501780    0.459017    0.276999    11.00000    0.01536    0.01425 =
         0.01659   -0.00139   -0.00098   -0.00551
N2    3    0.021718    0.456886    0.310888    11.00000    0.02309    0.03525 =
         0.03186    0.00831   -0.00827   -0.01406
C1    1    0.364606    0.479676    0.255094    11.00000    0.01653    0.01199 =
         0.01564   -0.00262   -0.00039   -0.00510
C2    1    0.285216    0.418075    0.343518    11.00000    0.01552    0.01509 =
         0.01682   -0.00095   -0.00153   -0.00598
C3    1    0.347628    0.333666    0.451120    11.00000    0.01676    0.01343 =
         0.01552   -0.00221   -0.00007   -0.00532
C4    1    0.489983    0.314448    0.468484    11.00000    0.01721    0.01448 =
         0.01443   -0.00222   -0.00143   -0.00609
C5    1    0.562293    0.380336    0.380329    11.00000    0.01672    0.01442 =
         0.01621   -0.00278   -0.00078   -0.00585
C6    1    0.139374    0.441148    0.322432    11.00000    0.02021    0.01977 =
         0.01908    0.00349   -0.00260   -0.00843
C7    1    0.262422    0.270254    0.540061    11.00000    0.01545    0.02102 =
         0.01763   -0.00101    0.00015   -0.00841
H7    2    0.165390    0.328931    0.555360    11.00000    0.03799
C8    1    0.316785    0.136270    0.599145    11.00000    0.01814    0.01996 =
         0.01836   -0.00324    0.00103   -0.00902
H8    2    0.416160    0.079158    0.582415    11.00000    0.02917
C9    1    0.239542    0.068398    0.691006    11.00000    0.02089    0.01856 =
         0.01493   -0.00211   -0.00159   -0.01024
C10   1    0.097333    0.141788    0.735001    11.00000    0.02153    0.02042 =
         0.02019   -0.00216   -0.00057   -0.00869
H10   2    0.046888    0.242488    0.706448    11.00000    0.01997
C11   1    0.030766    0.072149    0.822703    11.00000    0.02174    0.02943 =
         0.02116   -0.00522    0.00300   -0.01217
H11   2   -0.067175    0.129345    0.848272    11.00000    0.02631
C12   1    0.104010   -0.071650    0.868233    11.00000    0.03082    0.02844 =
         0.01673   -0.00166    0.00186   -0.01931
H12   2    0.058734   -0.115303    0.928037    11.00000    0.02632
C13   1    0.244474   -0.145544    0.826213    11.00000    0.03177    0.01974 =
         0.01761   -0.00043   -0.00255   -0.01295
H13   2    0.297994   -0.247215    0.855744    11.00000    0.02964
C14   1    0.312190   -0.076020    0.738747    11.00000    0.02207    0.01909 =
         0.01768   -0.00311   -0.00082   -0.00875
H14   2    0.410721   -0.125845    0.707626    11.00000    0.03082
C15   1    0.561341    0.229472    0.583036    11.00000    0.01714    0.01889 =
         0.01662   -0.00075   -0.00177   -0.01021
C16   1    0.755575    0.022111    0.669146    11.00000    0.02613    0.03713 =
         0.02176    0.01087   -0.00811   -0.00438
H16A  2    0.757459    0.080994    0.724530    11.00000    0.03283
H16B  2    0.690524   -0.022300    0.709473    11.00000    0.07668
C17   1    0.900339   -0.081162    0.630491    11.00000    0.03276    0.02729 =
         0.03201   -0.00056   -0.01328   -0.00301
H17A  2    0.892201   -0.123269    0.570374    11.00000    0.06074
H17B  2    0.969526   -0.025432    0.597832    11.00000    0.05844
H17C  2    0.946141   -0.149954    0.704302    11.00000    0.04566
N3    3    0.623928    0.618985    0.083630    11.00000    0.01808    0.01839 =
         0.01584    0.00059   -0.00157   -0.00857
H3A   2    0.638658    0.564622    0.028866    11.00000    0.02429
H3B   2    0.576295    0.577523    0.151596    11.00000    0.03800
C18   1    0.711896    0.370413    0.397075    11.00000    0.01811    0.02446 =
         0.02226   -0.00140   -0.00318   -0.01026
H18A  2    0.782827    0.298855    0.358717    11.00000    0.04092
H18B  2    0.730192    0.354049    0.484185    11.00000    0.03945
H18C  2    0.715960    0.465371    0.361522    11.00000    0.02606
C19   1    0.529386    0.770441    0.036706    11.00000    0.01897    0.01883 =
         0.01906    0.00169   -0.00266   -0.00648
H19A  2    0.441994    0.768412    0.006974    11.00000    0.03550
H19B  2    0.501403    0.822065    0.107198    11.00000    0.02676
C20   1    0.610731    0.831488   -0.064541    11.00000    0.02339    0.01889 =
         0.01671    0.00220   -0.00303   -0.00889
H20A  2    0.631868    0.777462   -0.131033    11.00000    0.02832
H20B  2    0.546675    0.929121   -0.094235    11.00000    0.03192
C21   1    0.752034    0.822878   -0.021709    11.00000    0.02545    0.02608 =
         0.02201    0.00279   -0.00177   -0.01603
H21A  2    0.795913    0.865472   -0.086793    11.00000    0.03285
H21B  2    0.730430    0.885288    0.045099    11.00000    0.03160
C22   1    0.847252    0.667840    0.025981    11.00000    0.01837    0.02777 =
         0.02175    0.00016   -0.00086   -0.01047
H22A  2    0.878953    0.608295   -0.038627    11.00000    0.03097
H22B  2    0.936298    0.661872    0.059532    11.00000    0.02069
C23   1    0.765923    0.602882    0.124996    11.00000    0.01863    0.02384 =
         0.01848    0.00292   -0.00386   -0.00965
H23A  2    0.820377    0.497235    0.153713    11.00000    0.02349
H23B  2    0.737056    0.651167    0.204043    11.00000    0.02816
HKLF 4


REM  SKM265_0m_a.res in P-1
REM R1 =  0.0390 for    4716 Fo > 4sig(Fo)  and  0.0456 for all    5673 data
REM    370 parameters refined using      0 restraints

END

WGHT      0.0775      0.0000

REM Highest difference peak  0.490,  deepest hole -0.224,  1-sigma level  0.060
Q1    1   0.3147  0.3769  0.3942  11.00000  0.05    0.49
Q2    1   0.3189  0.5362  0.1923  11.00000  0.05    0.48
Q3    1   0.5202  0.2763  0.5186  11.00000  0.05    0.44
Q4    1   0.3216  0.4548  0.3024  11.00000  0.05    0.40
Q5    1   0.5234  0.3570  0.4294  11.00000  0.05    0.39
;
_shelx_res_checksum   65724

_shelx_hkl_file
;
  -1   0   0  986.10   26.50
  -1   0   0 1003.80   26.30
  -1   0   0 1016.80   26.30
   1   0   0 1067.19   26.60
   1   0   0  961.50   26.40
  -2   0   0  509.15   13.40
  -2   0   0  513.05   13.40
  -2   0   0  500.55   13.30
   2   0   0  516.95   13.30
   2   0   0  497.05   13.40
   2   0   0  500.95   13.30
  -3   0   0  155.98    4.30
  -3   0   0  163.48    4.30
  -3   0   0  153.98    4.20
  -3   0   0  156.88    4.30
   3   0   0  150.88    4.20
   3   0   0  151.78    4.30
   3   0   0  156.38    4.30
  -4   0   0  524.05   14.10
  -4   0   0  531.85   14.00
  -4   0   0  507.05   14.00
  -4   0   0  522.25   14.10
   4   0   0  544.05   14.00
   4   0   0  523.75   14.00
   4   0   0  536.05   14.10
  -5   0   0  672.73   18.20
  -5   0   0  661.63   18.10
  -5   0   0  659.83   18.00
  -5   0   0  680.03   18.20
   5   0   0  711.03   18.10
   5   0   0  691.83   18.20
   5   0   0  684.63   18.20
   5   0   0  683.23   18.00
  -6   0   0    0.30    0.50
  -6   0   0    0.70    0.50
  -6   0   0    0.30    0.40
   6   0   0    0.40    0.50
   6   0   0    0.90    0.50
   6   0   0    0.40    0.50
   6   0   0    0.20    0.30
  -7   0   0   24.80    1.30
  -7   0   0   23.50    1.40
  -7   0   0   20.90    1.10
   7   0   0   26.20    1.40
   7   0   0   24.60    1.20
   7   0   0   25.40    1.40
  -8   0   0   47.10    2.10
  -8   0   0   52.29    1.90
  -8   0   0   50.39    2.20
   8   0   0   51.69    1.90
   8   0   0   49.00    2.10
   8   0   0   49.20    2.20
  -9   0   0   14.60    1.50
  -9   0   0   14.50    1.50
  -9   0   0   13.50    1.10
   9   0   0   15.30    1.40
   9   0   0   15.70    1.40
   9   0   0   14.30    1.20
 -10   0   0    4.80    0.90
 -10   0   0    4.70    1.10
  10   0   0    4.60    1.10
 -11   0   0   -0.10    0.90
 -11   0   0    0.20    1.10
  11   0   0    0.50    1.30
 -12   0   0    0.90    1.40
 -12   0   0    0.40    1.10
  12   0   0    1.20    1.80
  12  -1   0   14.30    2.30
 -12   1   0   13.30    1.60
  11  -1   0   17.30    2.00
 -11   1   0   11.30    1.80
 -11   1   0   14.70    1.50
  10  -1   0    6.00    1.40
 -10   1   0    5.00    1.20
 -10   1   0    7.00    1.00
   9  -1   0  290.27    8.50
   9  -1   0  293.27    8.20
   9  -1   0  287.27    8.50
  -9   1   0  272.87    8.50
  -9   1   0  292.27    8.20
   8  -1   0   24.60    1.30
   8  -1   0   25.50    1.60
   8  -1   0   23.90    1.50
  -8   1   0   24.50    1.50
  -8   1   0   23.30    1.30
  -8   1   0   24.90    1.60
   7  -1   0  128.49    3.90
   7  -1   0  128.19    4.10
   7  -1   0  131.99    4.10
  -7   1   0  128.69    4.10
  -7   1   0  126.29    3.90
  -7   1   0  131.79    4.20
   6  -1   0    0.60    0.40
   6  -1   0    0.20    0.50
   6  -1   0    0.20    0.50
  -6   1   0    0.40    0.40
  -6   1   0    0.30    0.50
  -6   1   0    0.60    0.60
   5  -1   0   17.40    0.90
   5  -1   0   17.60    0.80
   5  -1   0   16.20    1.00
   5  -1   0   14.60    0.90
  -5   1   0   15.70    0.80
  -5   1   0   17.20    1.00
  -5   1   0   16.30    1.00
   4  -1   0   14.40    0.80
   4  -1   0   14.10    0.80
   4  -1   0   15.40    0.80
   4  -1   0   14.70    0.70
  -4   1   0   13.40    0.80
  -4   1   0   15.70    0.70
  -4   1   0   13.60    0.80
  -4   1   0   13.90    0.70
   3  -1   0   63.99    1.90
   3  -1   0   63.29    1.80
   3  -1   0   62.69    1.90
   3  -1   0   66.79    2.00
  -3   1   0   62.99    2.00
  -3   1   0   61.69    1.80
  -3   1   0   63.99    2.00
  -3   1   0   60.59    1.90
   2  -1   0   56.89    1.70
   2  -1   0   58.09    1.70
   2  -1   0   56.49    1.60
   2  -1   0   56.49    1.70
  -2   1   0   58.59    1.80
  -2   1   0   56.99    1.70
   1  -1   0 1346.17   36.10
   1  -1   0 1450.15   36.20
   1  -1   0 1355.86   36.00
  -1   1   0 1387.36   36.10
  -1   1   0 1336.37   36.10
   0  -1   0  146.69    4.00
   0  -1   0  158.58    4.00
   0   1   0  147.19    4.00
   0   1   0  148.99    4.00
  -1  -1   0   23.90    0.70
  -1  -1   0   23.30    0.70
  -1  -1   0   22.10    0.70
   1   1   0   22.90    0.70
   1   1   0   23.30    0.70
  -2  -1   0  171.28    4.60
  -2  -1   0  161.08    4.50
  -2  -1   0  166.48    4.60
  -2  -1   0  169.68    4.60
   2   1   0  175.78    4.60
   2   1   0  173.78    4.50
   2   1   0  171.78    4.60
  -3  -1   0   66.39    1.90
  -3  -1   0   65.89    2.00
  -3  -1   0   66.79    2.00
  -3  -1   0   66.59    1.90
   3   1   0   66.09    1.90
   3   1   0   66.59    1.90
   3   1   0   68.09    2.00
  -4  -1   0   14.20    0.70
  -4  -1   0   14.10    0.70
  -4  -1   0   15.60    0.60
  -4  -1   0   14.30    0.70
   4   1   0   14.40    0.70
   4   1   0   14.10    0.60
   4   1   0   14.40    0.70
  -5  -1   0   45.20    1.60
  -5  -1   0   45.80    1.60
  -5  -1   0   46.50    1.50
  -5  -1   0   47.00    1.50
   5   1   0   42.00    1.60
   5   1   0   46.40    1.50
   5   1   0   47.60    1.60
  -6  -1   0  470.95   12.70
  -6  -1   0  468.25   12.50
  -6  -1   0  465.95   12.70
  -6  -1   0  460.75   12.60
   6   1   0  477.55   12.50
   6   1   0  476.45   12.60
   6   1   0  445.76   12.70
  -7  -1   0    0.30    0.50
  -7  -1   0   -0.10    0.40
  -7  -1   0    0.10    0.50
   7   1   0    0.10    0.60
   7   1   0    0.10    0.60
   7   1   0    0.20    0.40
  -8  -1   0    2.00    0.70
  -8  -1   0    1.70    0.60
  -8  -1   0    0.80    0.70
   8   1   0    1.50    0.70
   8   1   0    1.60    0.70
   8   1   0    1.10    0.50
  -9  -1   0    3.00    0.70
  -9  -1   0    4.40    1.00
  -9  -1   0    4.40    0.90
   9   1   0    3.20    0.90
   9   1   0    5.00    1.00
   9   1   0    3.10    0.70
 -10  -1   0    0.20    0.70
 -10  -1   0   -0.10    0.80
  10   1   0    0.00    0.90
 -11  -1   0    5.80    1.00
 -11  -1   0    6.50    1.30
  11   1   0    8.40    1.40
 -12  -1   0   54.89    2.50
 -12  -1   0   50.09    2.90
  12   1   0   58.39    3.30
  11  -2   0   10.70    1.80
 -11   2   0    7.00    1.70
 -11   2   0    6.60    1.30
  10  -2   0   -0.20    1.10
 -10   2   0    0.00    1.10
 -10   2   0    0.00    0.80
   9  -2   0   33.20    1.80
   9  -2   0   36.60    2.10
   9  -2   0   35.10    2.00
  -9   2   0   36.10    1.70
  -9   2   0   35.40    2.10
   8  -2   0   19.00    1.30
   8  -2   0   20.90    1.60
   8  -2   0   20.60    1.60
  -8   2   0   22.20    1.30
  -8   2   0   21.10    1.50
   7  -2   0    3.40    0.60
   7  -2   0    4.00    0.80
   7  -2   0    2.80    0.80
  -7   2   0    2.70    0.80
  -7   2   0    3.50    0.60
   6  -2   0   47.60    1.70
   6  -2   0   44.10    1.90
   6  -2   0   47.40    1.90
  -6   2   0   47.10    2.00
  -6   2   0   44.70    1.70
   5  -2   0   89.49    2.90
   5  -2   0   86.09    2.70
   5  -2   0   89.09    2.80
   5  -2   0   88.09    2.80
  -5   2   0   84.19    2.90
  -5   2   0   89.59    2.70
   4  -2   0    4.80    0.50
   4  -2   0    3.60    0.50
   4  -2   0    3.70    0.60
   4  -2   0    2.70    0.50
  -4   2   0    2.80    0.40
  -4   2   0    4.20    0.50
  -4   2   0    3.10    0.50
   3  -2   0  186.28    5.10
   3  -2   0  178.88    5.00
   3  -2   0  182.68    5.10
   3  -2   0  175.88    5.20
  -3   2   0  186.18    5.20
   2  -2   0  144.29    3.90
   2  -2   0  142.29    3.90
   2  -2   0  138.69    4.00
   2  -2   0  134.69    3.80
  -2   2   0  139.99    4.00
   1  -2   0  290.57    7.80
   1  -2   0  286.67    7.90
   1  -2   0  298.97    7.80
  -1   2   0  291.97    7.80
   0  -2   0  138.09    3.80
   0  -2   0  135.89    3.70
   0   2   0  138.29    3.70
   0   2   0  138.29    3.80
  -1  -2   0  854.31   22.30
  -1  -2   0  873.31   22.40
  -1  -2   0  838.72   22.30
   1   2   0  853.51   22.30
   1   2   0  855.01   22.30
   1   2   0  834.62   22.30
  -2  -2   0  183.08    4.90
  -2  -2   0  189.08    5.00
  -2  -2   0  184.48    5.00
  -2  -2   0  178.78    5.00
   2   2   0  188.38    4.90
   2   2   0  184.58    5.00
   2   2   0  182.68    5.00
  -3  -2   0  479.75   12.60
  -3  -2   0  487.85   12.60
  -3  -2   0  481.45   12.60
   3   2   0  456.75   12.60
   3   2   0  473.75   12.50
   3   2   0  471.45   12.60
  -4  -2   0   27.10    1.00
  -4  -2   0   28.00    1.00
  -4  -2   0   28.10    1.00
  -4  -2   0   28.00    1.00
   4   2   0   26.80    1.00
   4   2   0   27.40    1.10
   4   2   0   26.50    0.90
  -5  -2   0  252.37    7.00
  -5  -2   0  251.87    7.00
  -5  -2   0  261.07    6.90
  -5  -2   0  254.57    7.00
   5   2   0  254.17    7.00
   5   2   0  253.37    6.90
   5   2   0  253.87    7.10
  -6  -2   0   71.09    2.30
  -6  -2   0   74.39    2.20
  -6  -2   0   71.79    2.40
  -6  -2   0   68.09    2.30
   6   2   0   72.29    2.20
   6   2   0   70.59    2.30
   6   2   0   74.39    2.40
  -7  -2   0   24.00    1.20
  -7  -2   0   21.50    1.10
  -7  -2   0   24.10    1.30
   7   2   0   25.10    1.30
   7   2   0   22.80    1.20
   7   2   0   23.90    1.10
  -8  -2   0   12.20    1.00
  -8  -2   0   12.10    1.00
  -8  -2   0   10.20    1.00
   8   2   0   12.80    0.90
   8   2   0   14.20    1.20
  -9  -2   0   44.00    2.00
  -9  -2   0   39.30    2.00
  -9  -2   0   45.20    1.80
   9   2   0   44.80    2.10
   9   2   0   43.10    1.80
 -10  -2   0   49.90    2.30
 -10  -2   0   47.00    2.10
  10   2   0   47.10    2.40
 -11  -2   0   25.30    1.70
 -11  -2   0   24.70    1.80
  11   2   0   24.70    1.90
 -12  -2   0   38.50    2.60
 -12  -2   0   36.80    2.10
  12   2   0   38.50    2.60
 -13  -2   0    3.50    1.40
 -13  -2   0    3.20    1.60
  13   2   0    3.20    2.00
  10  -3   0    0.70    1.30
 -10   3   0    1.10    0.90
 -10   3   0    0.50    1.30
   9  -3   0   19.30    1.90
   9  -3   0   19.10    2.00
  -9   3   0   17.60    1.40
  -9   3   0   17.90    1.80
   8  -3   0   13.40    1.20
   8  -3   0   11.90    1.60
   8  -3   0   12.10    1.40
  -8   3   0   12.50    1.20
  -8   3   0    8.50    1.30
   7  -3   0    2.00    0.80
   7  -3   0    3.20    0.90
   7  -3   0    3.00    0.70
  -7   3   0    2.00    0.60
  -7   3   0    2.90    0.80
   6  -3   0  111.99    3.70
   6  -3   0  112.49    3.40
   6  -3   0  107.99    3.60
  -6   3   0  109.39    3.40
  -6   3   0  113.09    3.70
   5  -3   0    0.30    0.50
   5  -3   0    0.70    0.40
   5  -3   0    0.80    0.60
  -5   3   0    0.20    0.50
  -5   3   0    0.60    0.40
   4  -3   0   54.29    2.00
   4  -3   0   56.19    1.90
   4  -3   0   52.29    1.90
   4  -3   0   56.29    1.80
  -4   3   0   57.09    1.80
  -4   3   0   50.49    2.00
   3  -3   0   97.69    3.10
   3  -3   0   98.19    2.90
   3  -3   0   96.29    2.80
   3  -3   0   97.69    2.90
  -3   3   0   93.99    3.00
  -3   3   0   99.69    2.90
   2  -3   0   37.00    1.20
   2  -3   0   36.60    1.30
   2  -3   0   34.50    1.20
   2  -3   0   34.90    1.30
  -2   3   0   34.20    1.30
  -2   3   0   32.80    1.20
   1  -3   0   32.10    1.20
   1  -3   0   34.00    1.00
   1  -3   0   32.20    1.00
  -1   3   0   32.80    1.20
  -1   3   0   31.20    1.10
   0  -3   0   65.69    1.90
   0  -3   0   69.19    2.00
   0  -3   0   66.19    1.80
   0  -3   0   61.49    2.00
   0   3   0   66.09    1.90
   0   3   0   67.49    2.00
  -1  -3   0   27.10    0.90
  -1  -3   0   27.50    0.90
  -1  -3   0   25.90    1.00
   1   3   0   28.10    0.80
   1   3   0   28.90    0.90
   1   3   0   26.90    0.90
   1   3   0   26.50    0.90
  -2  -3   0  358.06    9.50
  -2  -3   0  352.36    9.40
  -2  -3   0  352.46    9.40
  -2  -3   0  348.57    9.40
   2   3   0  358.86    9.40
   2   3   0  360.16    9.40
   2   3   0  344.37    9.40
  -3  -3   0  720.33   19.20
  -3  -3   0  715.33   19.20
  -3  -3   0  728.33   19.30
   3   3   0  744.13   19.20
   3   3   0  717.23   19.20
   3   3   0  744.83   19.20
  -4  -3   0  193.58    5.40
  -4  -3   0  192.78    5.30
  -4  -3   0  191.28    5.30
  -4  -3   0  199.98    5.40
   4   3   0  192.38    5.40
   4   3   0  193.98    5.30
   4   3   0  193.58    5.30
  -5  -3   0    5.60    0.50
  -5  -3   0    6.00    0.50
  -5  -3   0    6.20    0.60
  -5  -3   0    6.40    0.50
   5   3   0    7.10    0.70
   5   3   0    5.20    0.50
   5   3   0    6.10    0.50
  -6  -3   0  228.78    6.20
  -6  -3   0  225.48    6.40
  -6  -3   0  229.08    6.30
  -6  -3   0  222.98    6.40
   6   3   0  222.68    6.20
   6   3   0  222.98    6.40
   6   3   0  231.48    6.40
  -7  -3   0   15.70    0.90
  -7  -3   0   15.20    1.00
  -7  -3   0   16.60    1.00
  -7  -3   0   15.50    1.00
   7   3   0   16.00    1.10
   7   3   0   16.70    1.10
   7   3   0   17.20    0.90
  -8  -3   0   19.10    1.10
  -8  -3   0   17.10    1.20
  -8  -3   0   15.80    1.10
   8   3   0   18.90    1.30
   8   3   0   17.90    1.10
   8   3   0   16.60    1.20
  -9  -3   0   96.69    3.10
  -9  -3   0   94.79    3.30
  -9  -3   0   92.89    3.30
   9   3   0   91.69    3.40
   9   3   0   93.59    3.10
 -10  -3   0   69.19    2.80
 -10  -3   0   70.89    2.60
  10   3   0   69.69    2.90
 -11  -3   0    9.80    1.20
 -11  -3   0    5.80    1.20
  11   3   0    7.20    1.30
 -12  -3   0   -0.10    1.10
 -12  -3   0   -0.60    0.90
  12   3   0   -0.20    1.20
 -13  -3   0    8.10    1.90
 -13  -3   0   11.00    1.60
  13   3   0    9.00    1.90
 -10   4   0   23.20    1.90
 -10   4   0   22.10    2.40
   9  -4   0    1.30    1.20
  -9   4   0    0.70    0.80
  -9   4   0    1.50    1.20
   8  -4   0   43.50    2.50
   8  -4   0   43.10    2.00
  -8   4   0   42.60    2.40
  -8   4   0   42.90    1.90
   7  -4   0    7.60    0.90
   7  -4   0    7.10    1.10
   7  -4   0    8.30    1.30
  -7   4   0    7.90    0.90
  -7   4   0    7.00    1.10
   6  -4   0   -0.30    0.70
   6  -4   0    0.70    0.70
   6  -4   0    0.10    0.50
  -6   4   0    0.20    0.70
  -6   4   0    0.00    0.50
   5  -4   0   71.59    2.30
   5  -4   0   71.69    2.70
   5  -4   0   71.69    2.50
  -5   4   0   70.19    2.60
  -5   4   0   66.89    2.30
   4  -4   0   52.59    1.80
   4  -4   0   55.19    1.80
   4  -4   0   47.90    2.00
  -4   4   0   50.79    2.00
  -4   4   0   47.40    1.80
   3  -4   0  296.67    8.70
   3  -4   0  323.57    8.50
   3  -4   0  318.57    8.40
   3  -4   0  309.77    8.40
  -3   4   0  298.17    8.60
  -3   4   0  306.17    8.40
   2  -4   0  371.46   10.00
   2  -4   0  382.26   10.10
   2  -4   0  383.26   10.00
   2  -4   0  360.56   10.20
  -2   4   0  369.16   10.00
  -2   4   0  362.66   10.20
   1  -4   0   31.60    1.00
   1  -4   0   30.50    1.00
   1  -4   0   31.60    1.20
   1  -4   0   30.80    1.30
  -1   4   0   27.60    1.10
  -1   4   0   28.70    1.20
   0  -4   0  570.94   15.00
   0  -4   0  548.45   15.10
   0  -4   0  572.94   14.80
   0   4   0  562.74   15.00
   0   4   0  560.24   14.90
  -1  -4   0   24.20    1.00
  -1  -4   0   23.50    0.90
  -1  -4   0   24.60    0.90
   1   4   0   25.30    0.70
   1   4   0   24.20    0.90
   1   4   0   23.20    0.90
   1   4   0   24.90    0.90
  -2  -4   0  744.23   19.70
  -2  -4   0  739.23   19.80
  -2  -4   0  746.03   19.70
  -2  -4   0  726.93   19.70
   2   4   0  741.23   19.70
   2   4   0  759.02   19.80
   2   4   0  758.22   19.60
   2   4   0  762.42   19.70
  -3  -4   0  207.78    5.80
  -3  -4   0  215.98    5.80
  -3  -4   0  212.58    5.80
  -3  -4   0  213.78    5.90
   3   4   0  207.98    5.80
   3   4   0  220.08    5.80
   3   4   0  209.28    5.80
  -4  -4   0  136.79    3.90
  -4  -4   0  138.49    3.90
  -4  -4   0  138.69    4.00
  -4  -4   0  139.39    3.80
   4   4   0  136.59    3.80
   4   4   0  133.59    3.90
   4   4   0  134.29    3.90
  -5  -4   0    2.00    0.40
  -5  -4   0    2.40    0.50
  -5  -4   0    2.30    0.40
  -5  -4   0    2.40    0.40
   5   4   0    2.60    0.40
   5   4   0    2.20    0.40
   5   4   0    2.80    0.50
  -6  -4   0  121.59    3.60
  -6  -4   0  114.29    3.60
  -6  -4   0  124.89    3.50
  -6  -4   0  119.69    3.60
   6   4   0  121.49    3.60
   6   4   0  120.79    3.50
   6   4   0  119.39    3.60
  -7  -4   0  107.49    3.40
  -7  -4   0  106.89    3.40
  -7  -4   0  106.89    3.30
  -7  -4   0  109.29    3.20
   7   4   0  101.89    3.30
   7   4   0  107.79    3.20
   7   4   0  110.19    3.40
  -8  -4   0    2.70    0.70
  -8  -4   0    3.40    0.70
  -8  -4   0    3.10    0.70
   8   4   0    3.70    0.80
   8   4   0    3.10    0.80
   8   4   0    2.90    0.60
  -9  -4   0    0.20    0.60
  -9  -4   0    0.90    0.70
  -9  -4   0    0.30    0.70
   9   4   0    0.20    0.70
 -10  -4   0    3.20    0.90
 -10  -4   0    1.10    0.80
  10   4   0    1.80    0.90
 -11  -4   0    5.90    1.00
 -11  -4   0    4.00    1.10
  11   4   0    4.80    1.20
 -12  -4   0    0.50    1.10
 -12  -4   0    0.60    1.00
  12   4   0    0.40    1.20
 -13  -4   0    1.50    1.60
 -13  -4   0    1.60    1.30
  13   4   0    2.00    1.50
   9  -5   0    0.50    1.40
  -9   5   0    0.00    0.90
  -9   5   0    0.40    1.60
   8  -5   0   -0.20    0.90
   8  -5   0    1.10    1.30
  -8   5   0    0.70    1.10
  -8   5   0    0.50    0.80
   7  -5   0   50.29    2.20
   7  -5   0   51.49    2.50
  -7   5   0   54.69    2.10
  -7   5   0   48.00    2.40
   6  -5   0   21.10    1.30
   6  -5   0   22.50    1.80
  -6   5   0   21.00    1.30
  -6   5   0   22.70    1.60
   5  -5   0   26.70    1.60
   5  -5   0   26.30    1.30
  -5   5   0   28.00    1.30
  -5   5   0   27.90    1.60
   4  -5   0   15.10    1.10
   4  -5   0   18.20    1.30
   4  -5   0   16.30    1.00
  -4   5   0   17.20    1.20
  -4   5   0   15.70    1.00
   3  -5   0    0.00    0.50
   3  -5   0    0.10    0.60
   3  -5   0    0.20    0.40
  -3   5   0    0.20    0.50
  -3   5   0    0.00    0.40
   2  -5   0   17.10    0.80
   2  -5   0   14.50    1.00
   2  -5   0   14.90    1.30
   2  -5   0   15.80    0.80
  -2   5   0   12.20    0.90
  -2   5   0   13.40    0.80
   1  -5   0  136.19    3.60
   1  -5   0  130.39    3.80
   1  -5   0  127.19    4.00
   1  -5   0  124.79    3.70
  -1   5   0  129.69    3.70
  -1   5   0  129.09    3.90
   0  -5   0    0.90    0.40
   0  -5   0    0.70    0.20
   0  -5   0    1.20    0.40
   0  -5   0    0.60    0.30
   0   5   0    0.50    0.30
   0   5   0    0.90    0.40
  -1  -5   0   13.10    0.90
  -1  -5   0   11.70    0.60
   1   5   0   13.30    0.70
   1   5   0   10.90    0.70
   1   5   0   13.80    0.50
   1   5   0   13.50    0.70
  -2  -5   0  229.28    6.20
  -2  -5   0  218.18    6.30
  -2  -5   0  215.08    6.10
  -2  -5   0  223.48    6.10
   2   5   0  213.38    6.10
   2   5   0  227.58    5.90
   2   5   0  233.78    6.10
   2   5   0  218.08    6.10
  -3  -5   0   41.10    1.50
  -3  -5   0   39.90    1.40
  -3  -5   0   43.10    1.40
  -3  -5   0   43.60    1.40
   3   5   0   39.00    1.40
   3   5   0   41.10    1.40
   3   5   0   42.60    1.30
  -4  -5   0   55.79    1.80
  -4  -5   0   54.69    1.80
  -4  -5   0   51.69    1.90
  -4  -5   0   57.09    1.80
   4   5   0   56.09    1.70
   4   5   0   49.60    1.80
   4   5   0   55.59    1.70
  -5  -5   0   12.20    0.80
  -5  -5   0    9.70    0.70
  -5  -5   0   10.90    0.80
  -5  -5   0   12.40    0.70
   5   5   0   12.10    0.70
   5   5   0   11.50    0.70
   5   5   0   12.50    0.80
  -6  -5   0  295.67    7.90
  -6  -5   0  293.47    8.00
  -6  -5   0  296.17    8.00
  -6  -5   0  281.87    8.00
   6   5   0  279.17    8.00
   6   5   0  292.77    7.90
   6   5   0  283.37    8.00
  -7  -5   0   94.19    2.90
  -7  -5   0   91.39    3.00
  -7  -5   0   90.99    2.90
  -7  -5   0   92.59    3.00
   7   5   0   89.59    3.00
   7   5   0   94.99    3.10
   7   5   0   94.69    2.90
  -8  -5   0   26.20    1.40
  -8  -5   0   24.30    1.40
  -8  -5   0   25.80    1.40
   8   5   0   25.50    1.50
   8   5   0   27.00    1.40
  -9  -5   0  103.09    3.50
  -9  -5   0  111.39    3.50
   9   5   0  106.29    3.70
   9   5   0  105.49    3.60
 -10  -5   0   11.60    1.20
 -10  -5   0   12.00    1.30
  10   5   0   11.70    1.30
 -11  -5   0   27.60    1.80
 -11  -5   0   26.30    1.70
  11   5   0   22.60    1.90
 -12  -5   0   82.99    3.30
 -12  -5   0   80.09    3.20
  12   5   0   72.69    3.40
 -13  -5   0    7.70    1.60
 -13  -5   0   11.70    1.60
  13   5   0    8.20    1.80
   9  -6   0    2.20    2.00
   8  -6   0    1.90    1.40
  -8   6   0    1.50    1.00
  -8   6   0    1.70    1.40
   7  -6   0   57.89    2.40
   7  -6   0   53.59    2.80
  -7   6   0   57.39    2.80
  -7   6   0   52.39    2.30
   6  -6   0   33.70    1.80
   6  -6   0   34.00    2.30
  -6   6   0   36.80    1.70
  -6   6   0   35.30    2.00
   5  -6   0   63.89    2.80
   5  -6   0   67.29    2.40
  -5   6   0   75.19    2.80
  -5   6   0   67.19    2.40
   4  -6   0   66.99    2.40
   4  -6   0   69.89    2.80
  -4   6   0   67.59    2.70
  -4   6   0   71.99    2.40
   3  -6   0   29.00    1.30
   3  -6   0   32.00    1.70
  -3   6   0   30.00    1.50
  -3   6   0   29.10    1.30
   2  -6   0    0.50    0.60
   2  -6   0    0.70    0.40
  -2   6   0    0.70    0.40
  -2   6   0    0.80    0.60
   1  -6   0    0.20    0.40
   1  -6   0   -0.10    0.50
  -1   6   0   -0.10    0.50
  -1   6   0    0.10    0.30
   0  -6   0  224.28    6.50
   0  -6   0  227.58    6.30
   0  -6   0  226.78    6.20
   0   6   0  224.68    6.40
   0   6   0  218.18    6.20
  -1  -6   0   12.50    0.90
  -1  -6   0   14.60    0.70
  -1  -6   0   13.70    0.90
   1   6   0   14.40    0.80
   1   6   0   12.20    0.70
   1   6   0   13.60    0.80
  -2  -6   0   23.10    1.00
  -2  -6   0   22.90    0.90
  -2  -6   0   19.60    1.20
  -2  -6   0   21.30    1.10
   2   6   0   21.90    1.00
   2   6   0   19.90    1.00
   2   6   0   23.00    0.70
   2   6   0   21.10    1.00
  -3  -6   0    4.80    0.50
  -3  -6   0    5.00    0.70
  -3  -6   0    4.90    0.60
   3   6   0    5.00    0.50
   3   6   0    5.10    0.40
   3   6   0    4.70    0.60
   3   6   0    4.30    0.50
  -4  -6   0  104.29    3.30
  -4  -6   0  107.59    3.20
  -4  -6   0  108.59    3.20
  -4  -6   0  110.19    3.20
   4   6   0  109.29    3.10
   4   6   0  100.39    3.20
   4   6   0  108.99    3.10
  -5  -6   0  207.68    6.20
  -5  -6   0  221.08    6.00
  -5  -6   0  214.58    6.10
  -5  -6   0  216.18    6.10
   5   6   0  222.08    6.00
   5   6   0  206.08    6.00
   5   6   0  219.98    6.10
  -6  -6   0   16.50    1.00
  -6  -6   0   21.70    1.00
  -6  -6   0   19.50    1.20
  -6  -6   0   20.30    1.10
   6   6   0   20.80    1.10
   6   6   0   17.80    1.10
   6   6   0   20.40    1.00
  -7  -6   0   91.09    3.00
  -7  -6   0   86.79    3.00
  -7  -6   0   85.99    2.90
  -7  -6   0   89.89    2.80
   7   6   0   91.49    3.00
   7   6   0   88.99    2.90
  -8  -6   0   70.69    2.60
  -8  -6   0   78.39    2.70
  -8  -6   0   67.19    2.50
   8   6   0   73.89    2.70
   8   6   0   73.79    2.60
  -9  -6   0    2.40    0.80
  -9  -6   0    1.20    0.70
   9   6   0    1.70    0.80
   9   6   0    2.90    0.90
 -10  -6   0   19.70    1.60
 -10  -6   0   18.00    1.40
  10   6   0   21.10    1.70
 -11  -6   0    3.30    1.20
 -11  -6   0    4.00    1.10
  11   6   0    4.40    1.20
 -12  -6   0  142.79    5.00
 -12  -6   0  152.78    4.90
  12   6   0  137.89    5.10
 -13  -6   0    1.80    1.30
 -13  -6   0    1.80    1.30
  13   6   0    3.50    1.70
   8  -7   0    6.70    2.00
  -8   7   0    7.50    1.90
   7  -7   0   55.09    3.00
  -7   7   0   51.89    2.30
  -7   7   0   53.59    3.10
   6  -7   0   15.50    1.90
   6  -7   0   14.70    1.50
  -6   7   0   15.70    1.80
  -6   7   0   16.70    1.40
   5  -7   0   48.60    2.60
   5  -7   0   52.79    2.20
  -5   7   0   53.29    2.10
  -5   7   0   50.69    2.50
   4  -7   0   47.40    1.90
   4  -7   0   45.90    2.40
  -4   7   0   46.30    2.20
  -4   7   0   52.29    2.00
   3  -7   0   24.40    1.60
   3  -7   0   25.40    1.30
  -3   7   0   25.10    1.50
  -3   7   0   24.00    1.30
   2  -7   0  186.18    5.80
   2  -7   0  179.88    5.30
  -2   7   0  188.58    5.60
  -2   7   0  187.28    5.30
   1  -7   0   55.69    2.20
   1  -7   0   51.89    1.90
  -1   7   0   51.59    1.90
  -1   7   0   51.29    2.00
   0  -7   0   12.00    0.80
   0  -7   0   12.60    1.10
   0   7   0   10.40    0.80
   0   7   0   10.40    0.90
  -1  -7   0   59.59    2.00
  -1  -7   0   61.99    2.40
   1   7   0   61.49    2.20
   1   7   0   63.29    2.10
  -2  -7   0   15.60    1.00
  -2  -7   0   12.80    1.00
  -2  -7   0   13.10    1.30
  -2  -7   0   13.40    0.80
   2   7   0   12.40    0.80
   2   7   0   14.50    1.00
  -3  -7   0    3.40    0.50
  -3  -7   0    2.00    0.60
  -3  -7   0    2.20    0.60
  -3  -7   0    2.80    0.60
   3   7   0    1.80    0.60
   3   7   0    2.00    0.50
  -4  -7   0   38.00    1.50
  -4  -7   0   33.00    1.60
  -4  -7   0   36.20    1.50
  -4  -7   0   35.90    1.40
   4   7   0   33.60    1.40
   4   7   0   37.40    1.30
  -5  -7   0   54.39    2.00
  -5  -7   0   49.70    2.00
  -5  -7   0   54.69    1.90
  -5  -7   0   53.99    2.00
   5   7   0   51.79    1.90
   5   7   0   54.49    1.80
  -6  -7   0   25.20    1.30
  -6  -7   0   22.80    1.30
  -6  -7   0   25.50    1.20
  -6  -7   0   23.20    1.30
   6   7   0   25.30    1.20
   6   7   0   21.60    1.20
  -7  -7   0    5.40    0.80
  -7  -7   0    4.70    0.80
  -7  -7   0    4.40    0.80
  -7  -7   0    5.20    0.70
   7   7   0    4.00    0.70
   7   7   0    5.10    0.80
  -8  -7   0    7.90    1.00
  -8  -7   0    8.20    1.00
  -8  -7   0    8.40    1.00
   8   7   0    9.00    1.00
   8   7   0    9.40    1.10
  -9  -7   0   50.99    2.20
  -9  -7   0   47.60    2.10
   9   7   0   47.10    2.10
   9   7   0   46.70    2.10
 -10  -7   0   16.10    1.60
 -10  -7   0   18.60    1.50
  10   7   0   17.60    1.70
 -11  -7   0    4.50    1.10
 -11  -7   0    3.90    1.20
  11   7   0    3.70    1.20
 -12  -7   0    0.70    1.90
 -12  -7   0    0.10    1.10
  12   7   0    0.90    1.20
 -13  -7   0    2.80    1.50
  13   7   0    2.70    1.60
   7  -8   0    6.60    1.90
  -7   8   0    5.10    1.90
   6  -8   0    0.40    1.50
  -6   8   0   -0.10    0.90
  -6   8   0    0.70    1.30
   5  -8   0    2.10    1.20
   5  -8   0    3.60    1.00
  -5   8   0    2.20    0.80
  -5   8   0    2.90    1.30
   4  -8   0    5.70    0.90
   4  -8   0    4.90    1.20
  -4   8   0    6.40    0.90
  -4   8   0    5.70    1.20
   3  -8   0    2.60    0.80
   3  -8   0    2.10    1.00
  -3   8   0    2.50    0.70
  -3   8   0    1.80    1.00
   2  -8   0    0.40    0.60
   2  -8   0    0.00    0.80
  -2   8   0    0.40    0.80
  -2   8   0    0.10    0.60
   1  -8   0   58.79    2.10
   1  -8   0   59.89    2.60
  -1   8   0   61.89    2.20
   0  -8   0    2.20    0.60
   0  -8   0    2.40    0.80
   0   8   0    1.90    0.70
   0   8   0    1.60    0.50
  -1  -8   0   14.90    1.20
  -1  -8   0   12.90    0.90
   1   8   0   11.70    1.00
   1   8   0   13.90    0.90
  -2  -8   0    2.30    0.50
  -2  -8   0    2.40    0.60
  -2  -8   0    3.30    0.80
   2   8   0    3.10    0.60
   2   8   0    2.80    0.70
  -3  -8   0    0.20    0.40
  -3  -8   0    0.10    0.60
  -3  -8   0   -0.10    0.50
   3   8   0    0.10    0.50
   3   8   0    0.50    0.50
  -4  -8   0    0.90    0.70
  -4  -8   0    0.40    0.50
  -4  -8   0    0.40    0.50
   4   8   0    0.50    0.50
  -5  -8   0    4.80    0.80
  -5  -8   0    6.00    0.70
  -5  -8   0    6.70    0.80
   5   8   0    5.20    0.70
  -6  -8   0    5.90    0.80
  -6  -8   0    4.60    0.90
  -6  -8   0    5.10    0.80
   6   8   0    4.60    0.80
  -7  -8   0    1.20    0.80
  -7  -8   0    0.90    0.90
  -7  -8   0    1.10    0.70
   7   8   0    1.40    0.70
   7   8   0    0.30    0.70
  -8  -8   0    4.10    0.90
  -8  -8   0    4.80    1.00
   8   8   0    4.10    0.90
   8   8   0    4.70    0.90
  -9  -8   0   65.69    2.70
   9   8   0   77.39    2.80
   9   8   0   70.29    2.80
 -10  -8   0   18.30    1.70
  10   8   0   21.50    1.80
  10   8   0   14.90    1.50
 -11  -8   0   18.20    1.80
  11   8   0   15.60    1.60
 -12  -8   0    0.80    1.20
  12   8   0    0.70    1.40
 -13  -8   0    0.40    1.50
  13   8   0   -0.30    1.70
   6  -9   0   22.00    2.80
  -6   9   0   25.40    2.60
   5  -9   0   46.20    2.90
  -5   9   0   49.80    2.80
  -5   9   0   49.30    2.20
   4  -9   0   19.20    1.60
   4  -9   0   20.00    2.00
  -4   9   0   15.90    1.90
  -4   9   0   19.00    1.50
   3  -9   0    3.30    1.30
  -3   9   0    4.20    1.20
  -3   9   0    4.30    0.80
   2  -9   0    1.20    1.00
   2  -9   0    1.70    0.70
  -2   9   0    1.40    0.70
  -2   9   0    0.80    1.00
   1  -9   0    3.80    1.00
   1  -9   0    2.80    0.70
  -1   9   0    1.70    0.70
  -1   9   0    2.90    0.90
   0  -9   0    0.70    0.60
   0  -9   0    0.10    0.80
   0   9   0    0.60    0.60
   0   9   0    0.50    0.80
  -1  -9   0    5.90    0.80
  -1  -9   0    6.50    1.10
   1   9   0    5.70    0.70
   1   9   0    5.40    0.90
  -2  -9   0   53.49    2.00
  -2  -9   0   54.39    2.40
  -2  -9   0   53.49    2.20
   2   9   0   59.99    2.30
   2   9   0   56.79    2.10
  -3  -9   0   12.40    1.20
  -3  -9   0   13.60    1.00
  -3  -9   0   14.30    1.10
   3   9   0   13.00    1.00
   3   9   0   13.40    1.10
  -4  -9   0  109.59    3.30
  -4  -9   0  100.29    3.40
  -4  -9   0  106.09    3.70
   4   9   0   98.29    3.30
  -5  -9   0    6.40    1.10
  -5  -9   0    5.50    0.90
  -5  -9   0    9.20    0.90
   5   9   0    6.40    0.80
  -6  -9   0  195.68    5.90
  -6  -9   0  184.78    5.60
   6   9   0  186.08    5.60
  -7  -9   0    0.10    0.90
  -7  -9   0   -0.20    0.70
   7   9   0    0.00    0.70
  -8  -9   0   43.00    2.00
  -8  -9   0   45.90    2.30
   8   9   0   44.80    2.00
  -9  -9   0   40.60    2.10
   9   9   0   41.50    2.00
 -10  -9   0    2.20    1.10
  10   9   0    3.60    1.10
 -11  -9   0   57.09    2.70
  11   9   0   48.50    2.50
 -12  -9   0    1.10    1.40
  12   9   0    1.10    1.30
 -13  -9   0    1.20    1.70
  13   9   0    2.00    1.80
   4 -10   0    2.40    1.60
  -4  10   0    1.70    1.40
  -4  10   0    2.80    1.00
   3 -10   0   32.40    2.50
   3 -10   0   39.70    2.10
  -3  10   0   31.40    2.30
  -3  10   0   34.10    1.80
   2 -10   0    0.30    1.20
   2 -10   0    0.80    0.90
  -2  10   0    0.40    0.80
  -2  10   0    0.50    1.10
   1 -10   0   29.60    1.70
   1 -10   0   29.30    2.10
  -1  10   0   33.50    2.10
  -1  10   0   30.00    1.60
   0 -10   0    6.50    0.90
   0 -10   0    6.60    1.40
   0  10   0    4.40    1.00
   0  10   0    4.60    0.80
  -1 -10   0   15.00    1.60
  -1 -10   0   16.60    1.30
   1  10   0   18.60    1.60
   1  10   0   16.20    1.20
  -2 -10   0   66.59    2.90
  -2 -10   0   71.49    2.50
  -2 -10   0   71.29    2.70
   2  10   0   70.79    2.80
   2  10   0   64.79    2.50
  -3 -10   0    0.90    0.60
  -3 -10   0    1.60    0.80
  -3 -10   0    0.70    0.90
   3  10   0    1.10    0.70
   3  10   0    0.70    0.80
  -4 -10   0    5.40    1.10
  -4 -10   0    4.50    0.80
  -4 -10   0    5.20    1.00
   4  10   0    5.60    0.90
  -5 -10   0   35.00    1.70
  -5 -10   0   33.10    1.90
  -5 -10   0   33.00    1.80
   5  10   0   35.30    1.70
  -6 -10   0   12.70    1.50
  -6 -10   0   13.80    1.40
   6  10   0   10.80    1.20
  -7 -10   0   23.40    1.80
  -7 -10   0   25.50    1.70
   7  10   0   26.40    1.60
  -8 -10   0    0.80    1.10
  -8 -10   0    1.30    1.00
   8  10   0    0.50    0.80
  -9 -10   0    4.70    1.20
   9  10   0    3.90    1.10
 -10 -10   0    0.30    1.00
  10  10   0    0.70    1.10
 -11 -10   0    3.70    1.50
  11  10   0    2.90    1.40
   3 -11   0    5.30    1.70
  -3  11   0    5.40    1.20
  -3  11   0    5.20    1.90
   2 -11   0    1.10    1.50
  -2  11   0    1.10    0.90
  -2  11   0    1.30    1.50
   1 -11   0    1.00    1.00
   1 -11   0    0.70    1.50
  -1  11   0    1.20    0.80
  -1  11   0    1.70    1.30
   0 -11   0   10.90    1.60
   0 -11   0   12.80    1.30
   0  11   0    9.10    1.00
   0  11   0   10.30    1.50
  -1 -11   0   14.40    1.50
  -1 -11   0   10.10    1.60
  -1 -11   0   12.00    1.40
   1  11   0   10.70    1.40
   1  11   0   10.60    1.30
  -2 -11   0   35.90    2.10
  -2 -11   0   32.40    2.20
  -2 -11   0   33.50    1.80
   2  11   0   37.60    2.20
   2  11   0   33.50    1.70
  -3 -11   0   -0.10    0.80
  -3 -11   0   -0.40    1.10
  -3 -11   0    0.10    1.00
   3  11   0    0.20    1.00
   3  11   0    0.40    0.80
  -4 -11   0    8.90    1.10
  -4 -11   0    7.70    1.20
  -4 -11   0    6.50    1.30
   4  11   0    7.50    1.00
  -5 -11   0   24.40    1.90
  -5 -11   0   29.10    1.80
   5  11   0   26.20    1.60
  -6 -11   0   -0.10    1.00
  -6 -11   0   -0.60    1.00
   6  11   0   -0.10    0.80
  -7 -11   0    2.70    1.10
   7  11   0    1.50    0.90
  -8 -11   0   42.20    2.50
   8  11   0   40.30    2.10
   9  11   0    0.60    1.00
  10  11   0    6.40    1.40
  11  11   0   32.00    2.40
   1 -12   0   -0.10    1.60
  -1  12   0   -0.20    1.00
   0 -12   0   28.30    2.60
   0  12   0   24.80    1.80
  -1 -12   0    2.50    1.40
   1  12   0    2.00    1.00
  -2 -12   0   44.30    2.90
   2  12   0   45.20    2.20
  -3 -12   0    8.90    1.60
   3  12   0    7.30    1.10
  -4 -12   0   10.10    1.70
   4  12   0    7.40    1.10
  -5 -12   0   20.00    2.00
   5  12   0   19.50    1.70
  -6 -12   0    0.20    1.20
   6  12   0    0.60    0.90
  -7 -12   0   26.40    2.30
   7  12   0   20.60    1.80
   8  12   0    8.10    1.30
   9  12   0    1.60    1.20
  10  12   0    0.70    1.40
  11  12   0   31.70    2.60
  -1 -13   0    3.30    2.00
   1  13   0    3.60    1.40
  -2 -13   0   81.49    4.00
   2  13   0   76.99    3.10
  -3 -13   0   21.80    2.40
   3  13   0   24.70    1.80
  -4 -13   0    1.20    1.60
   4  13   0    2.10    1.10
  -5 -13   0   11.50    1.90
   5  13   0   10.60    1.40
  -6 -13   0   15.80    2.20
   6  13   0   15.40    1.70
  -7 -13   0    7.60    1.90
   7  13   0    5.90    1.30
   8  13   0   15.20    1.70
   9  13   0    5.50    1.50
   9  13  -1    0.40    1.50
   8  13  -1    4.60    1.40
   7  13  -1   10.60    1.40
   6  13  -1    4.40    1.20
  -6 -13   1    5.20    1.80
   5  13  -1    0.60    1.10
  -5 -13   1    0.30    1.70
   4  13  -1   35.80    2.10
   3  13  -1   40.40    2.20
  -3 -13   1   46.20    3.30
   2  13  -1   -0.10    0.90
  -2 -13   1    0.10    1.60
  10  12  -1   14.60    1.70
   9  12  -1    3.00    1.20
   8  12  -1   -0.40    1.00
   7  12  -1   49.00    2.30
   6  12  -1   32.70    1.80
  -6 -12   1   27.20    2.20
  -6 -12   1   33.00    2.30
   5  12  -1   -0.10    0.80
  -5 -12   1   -0.10    1.20
  -5 -12   1   -0.10    1.20
   4  12  -1    1.10    0.90
  -4 -12   1    0.80    1.10
  -4 -12   1    2.50    1.10
  -4 -12   1    1.30    1.30
   3  12  -1    1.50    0.80
   3  12  -1    2.00    1.40
  -3 -12   1    1.40    1.30
  -3 -12   1    1.40    1.40
  -3 -12   1    1.20    1.00
   2  12  -1   42.20    2.60
   2  12  -1   37.30    1.90
  -2 -12   1   40.20    2.60
  -2 -12   1   39.40    2.70
  -2 -12   1   42.70    2.20
   1  12  -1   20.30    1.60
   1  12  -1   21.30    2.10
  -1 -12   1   21.20    1.90
  -1 -12   1   21.90    2.60
  -1 -12   1   22.00    2.00
   0  12  -1   22.60    1.70
   0  12  -1   27.70    2.50
   0 -12   1   27.10    2.80
   0 -12   1   22.90    2.00
  -1  12  -1    1.80    1.60
  -1  12  -1    1.00    1.00
   1 -12   1    0.30    1.70
   1 -12   1    1.00    1.70
  11  11  -1    4.70    1.50
  10  11  -1    3.10    1.20
 -10 -11   1    6.40    1.60
   9  11  -1   21.80    1.80
  -9 -11   1   23.30    2.10
   8  11  -1    8.50    1.20
  -8 -11   1    9.80    1.50
   7  11  -1   17.40    1.50
  -7 -11   1   18.50    1.80
   6  11  -1   66.79    2.60
  -6 -11   1   66.69    2.90
  -6 -11   1   66.99    3.00
   5  11  -1    3.90    0.90
  -5 -11   1    4.60    1.20
  -5 -11   1    3.20    0.90
  -5 -11   1    5.40    1.30
   4  11  -1   36.60    1.80
  -4 -11   1   38.40    2.10
  -4 -11   1   40.10    1.90
   3  11  -1   26.60    2.00
   3  11  -1   24.50    1.50
  -3 -11   1   24.60    1.60
  -3 -11   1   23.80    1.90
  -3 -11   1   23.10    2.00
   2  11  -1  163.48    5.20
   2  11  -1  147.09    4.70
  -2 -11   1  156.28    4.80
  -2 -11   1  154.08    5.40
  -2 -11   1  154.68    5.10
   1  11  -1  109.49    4.10
   1  11  -1   99.39    3.50
  -1 -11   1  112.09    4.30
  -1 -11   1  114.09    4.00
  -1 -11   1  104.59    3.60
   0  11  -1    0.70    1.10
   0  11  -1    1.30    0.80
   0 -11   1    1.70    0.90
   0 -11   1    1.80    1.30
  -1  11  -1   13.40    1.70
  -1  11  -1   12.80    1.30
   1 -11   1   14.60    2.10
   1 -11   1   15.00    1.60
  -2  11  -1    1.40    1.40
  -2  11  -1    1.20    0.90
   2 -11   1    0.70    1.00
   2 -11   1    0.20    1.50
  -3  11  -1   10.40    2.20
   3 -11   1   11.70    1.50
  12  10  -1    0.70    1.40
 -12 -10   1    1.00    1.60
  11  10  -1    5.30    1.40
 -11 -10   1    5.40    1.40
  10  10  -1   72.59    3.00
 -10 -10   1   71.39    3.20
   9  10  -1   16.60    1.60
  -9 -10   1   14.80    1.50
   8  10  -1   54.09    2.40
  -8 -10   1   61.79    2.60
   7  10  -1   17.70    1.40
  -7 -10   1   19.10    1.60
  -7 -10   1   19.60    1.80
   6  10  -1    4.30    0.80
  -6 -10   1    5.90    1.10
  -6 -10   1    5.30    0.90
  -6 -10   1    4.70    1.00
   5  10  -1   34.90    1.70
  -5 -10   1   37.10    1.70
  -5 -10   1   36.30    2.00
  -5 -10   1   35.30    1.80
   4  10  -1  110.79    3.70
  -4 -10   1  116.59    3.90
  -4 -10   1  116.99    3.70
   3  10  -1   36.00    1.60
   3  10  -1   37.10    1.90
  -3 -10   1   37.00    1.70
  -3 -10   1   37.70    2.10
  -3 -10   1   37.20    1.90
   2  10  -1   53.99    2.40
   2  10  -1   53.09    2.00
  -2 -10   1   52.79    2.40
  -2 -10   1   52.49    2.70
  -2 -10   1   53.19    2.10
   1  10  -1   90.79    3.10
   1  10  -1  100.89    3.60
  -1 -10   1   95.69    3.20
  -1 -10   1   95.49    3.80
   0  10  -1   17.70    1.70
   0  10  -1   17.80    1.20
   0 -10   1   16.60    1.40
   0 -10   1   18.80    1.80
  -1  10  -1   17.80    1.90
  -1  10  -1   18.80    1.20
   1 -10   1   21.10    2.10
   1 -10   1   17.50    1.40
  -2  10  -1   12.40    1.10
  -2  10  -1   15.40    1.80
   2 -10   1   13.40    1.40
   2 -10   1   15.80    2.10
  -3  10  -1    9.00    1.00
  -3  10  -1    8.40    1.60
   3 -10   1    9.10    1.70
   3 -10   1   11.00    1.30
  -4  10  -1   10.90    1.20
  -4  10  -1   15.70    2.10
   4 -10   1   13.20    2.00
 -12  -9   1    7.30    1.60
  11   9  -1   12.30    1.50
 -11  -9   1   11.40    1.60
  10   9  -1   35.70    2.10
 -10  -9   1   36.90    2.10
   9   9  -1    0.80    0.90
  -9  -9   1    1.30    1.00
   8   9  -1    5.50    1.00
  -8  -9   1    4.70    1.00
   7   9  -1   21.40    1.40
  -7  -9   1   21.60    1.50
  -7  -9   1   21.50    1.60
  -7  -9   1   21.20    1.40
   6   9  -1   37.80    1.70
  -6  -9   1   37.20    1.90
  -6  -9   1   39.30    2.00
  -6  -9   1   45.00    1.80
   5   9  -1    8.80    1.00
  -5  -9   1    6.80    0.80
  -5  -9   1    7.00    0.90
  -5  -9   1    8.40    1.10
   4   9  -1   48.30    1.90
  -4  -9   1   46.80    1.90
  -4  -9   1   46.90    2.00
  -4  -9   1   51.09    2.30
   3   9  -1    0.90    0.50
   3   9  -1    1.80    0.80
  -3  -9   1    1.10    0.80
  -3  -9   1    0.50    0.60
  -3  -9   1    1.80    0.80
   2   9  -1    2.20    0.60
   2   9  -1    2.30    0.90
  -2  -9   1    2.40    0.60
  -2  -9   1    2.50    0.80
  -2  -9   1    2.40    0.90
   1   9  -1    0.60    0.50
   1   9  -1    0.50    0.70
  -1  -9   1    0.80    0.60
  -1  -9   1    0.20    0.80
   0   9  -1    8.40    0.90
   0   9  -1   10.50    1.20
   0  -9   1    8.60    0.90
   0  -9   1    9.10    1.40
  -1   9  -1    0.10    0.50
  -1   9  -1    0.20    0.90
   1  -9   1   -0.10    1.00
   1  -9   1    0.10    0.60
  -2   9  -1   10.70    1.00
  -2   9  -1   10.70    1.40
   2  -9   1    8.70    1.00
   2  -9   1    9.00    1.40
  -3   9  -1    0.80    0.60
  -3   9  -1    0.70    1.00
   3  -9   1    0.50    1.10
   3  -9   1    0.90    0.70
  -4   9  -1   43.80    1.90
  -4   9  -1   47.50    2.70
   4  -9   1   40.30    2.10
   4  -9   1   41.50    2.70
  -5   9  -1    0.60    1.40
  -5   9  -1    1.40    0.80
   5  -9   1    0.90    1.60
   5  -9   1    1.00    1.10
  13   8  -1    0.70    1.80
 -13  -8   1    1.40    1.50
  12   8  -1    1.20    1.50
 -12  -8   1    0.80    1.40
  11   8  -1    1.10    1.10
  11   8  -1    0.60    1.10
 -11  -8   1    0.50    1.00
  10   8  -1   38.20    2.00
 -10  -8   1   36.70    2.00
   9   8  -1    0.10    0.80
   9   8  -1    0.40    0.90
  -9  -8   1    0.00    0.90
   8   8  -1   13.90    1.20
   8   8  -1   11.50    1.10
  -8  -8   1   11.50    1.20
   7   8  -1    0.70    0.60
  -7  -8   1    0.90    0.70
  -7  -8   1    0.70    0.60
  -7  -8   1    1.00    0.80
   6   8  -1   39.40    1.60
  -6  -8   1   36.30    1.80
  -6  -8   1   36.50    1.70
  -6  -8   1   36.70    1.60
   5   8  -1  197.18    5.90
  -5  -8   1  204.58    6.00
  -5  -8   1  207.68    6.10
  -5  -8   1  209.78    5.80
   4   8  -1    0.40    0.50
  -4  -8   1    0.40    0.60
  -4  -8   1    0.10    0.50
  -4  -8   1    0.90    0.50
   3   8  -1  127.79    4.10
   3   8  -1  129.49    3.90
  -3  -8   1  135.29    4.30
  -3  -8   1  128.49    3.90
  -3  -8   1  130.39    4.10
   2   8  -1   16.00    1.00
   2   8  -1   17.60    1.20
  -2  -8   1   16.10    1.20
  -2  -8   1   15.90    1.00
  -2  -8   1   17.80    1.30
   1   8  -1    3.00    0.60
   1   8  -1    3.90    0.80
  -1  -8   1    3.10    0.80
  -1  -8   1    3.50    0.60
   0   8  -1  195.28    5.60
   0   8  -1  172.88    5.20
   0  -8   1  183.88    5.20
   0  -8   1  175.78    5.70
  -1   8  -1    4.40    1.00
  -1   8  -1    4.40    0.60
   1  -8   1    4.00    0.90
   1  -8   1    2.00    0.60
  -2   8  -1   39.20    1.60
  -2   8  -1   41.10    2.10
   2  -8   1   41.40    1.70
   2  -8   1   40.00    2.20
  -3   8  -1    2.60    0.60
  -3   8  -1    2.30    1.00
   3  -8   1    3.80    1.20
   3  -8   1    2.40    0.70
  -4   8  -1    7.30    0.80
  -4   8  -1    7.30    1.30
   4  -8   1    8.20    1.00
   4  -8   1    7.50    1.40
  -5   8  -1   19.50    1.30
  -5   8  -1   18.20    1.80
   5  -8   1   16.60    1.90
   5  -8   1   19.00    1.50
  -6   8  -1   10.00    1.10
  -6   8  -1   10.60    1.70
   6  -8   1   11.20    1.40
   6  -8   1   13.00    2.00
  -7   8  -1   48.90    3.30
   7  -8   1   45.40    3.10
  13   7  -1   15.00    2.10
 -13  -7   1   13.40    1.90
  12   7  -1    7.70    1.60
 -12  -7   1    7.30    1.60
  11   7  -1   37.70    2.60
  11   7  -1   38.80    2.40
 -11  -7   1   39.80    2.30
  10   7  -1   19.10    1.60
  10   7  -1   20.90    1.70
 -10  -7   1   19.70    1.70
   9   7  -1    5.40    1.00
   9   7  -1    4.30    0.90
  -9  -7   1    4.10    1.00
   8   7  -1   13.90    1.10
   8   7  -1   14.60    1.20
  -8  -7   1   12.70    1.10
   7   7  -1   89.49    3.00
   7   7  -1   91.39    3.00
  -7  -7   1   88.99    3.10
  -7  -7   1   88.69    3.10
  -7  -7   1   89.69    2.90
   6   7  -1   13.70    1.00
   6   7  -1   16.10    1.00
  -6  -7   1   14.00    1.10
  -6  -7   1   18.20    1.00
  -6  -7   1   15.40    1.10
   5   7  -1    0.10    0.40
   5   7  -1   -0.10    0.50
  -5  -7   1    0.20    0.50
  -5  -7   1   -0.10    0.40
  -5  -7   1    0.40    0.60
   4   7  -1   61.89    2.10
  -4  -7   1   64.89    2.10
  -4  -7   1   62.09    2.20
   3   7  -1   28.70    1.20
   3   7  -1   29.10    1.40
  -3  -7   1   30.60    1.20
  -3  -7   1   28.10    1.40
  -3  -7   1   26.60    1.40
   2   7  -1   51.49    1.80
   2   7  -1   50.39    2.00
  -2  -7   1   56.59    2.00
  -2  -7   1   55.59    1.80
  -2  -7   1   52.69    2.10
   1   7  -1    0.00    0.40
   1   7  -1   -0.10    0.50
  -1  -7   1   -0.10    0.40
  -1  -7   1    0.10    0.60
   0   7  -1  137.09    4.30
   0   7  -1  132.99    3.90
   0  -7   1  135.19    4.00
   0  -7   1  141.89    4.40
  -1   7  -1  142.39    4.10
  -1   7  -1  141.49    4.50
   1  -7   1  140.39    4.60
   1  -7   1  146.19    4.20
  -2   7  -1   19.00    1.00
  -2   7  -1   19.90    1.30
   2  -7   1   19.10    1.10
   2  -7   1   18.50    1.40
  -3   7  -1   12.30    0.90
  -3   7  -1   11.10    1.20
   3  -7   1    9.50    1.00
   3  -7   1    9.40    1.30
  -4   7  -1    0.90    0.80
  -4   7  -1    1.50    0.60
   4  -7   1    1.20    0.60
   4  -7   1    1.30    0.90
  -5   7  -1    9.70    1.30
  -5   7  -1    9.30    1.00
   5  -7   1   10.40    1.50
   5  -7   1    9.70    1.00
  -6   7  -1   11.40    1.20
  -6   7  -1   11.90    1.70
   6  -7   1   11.20    1.80
   6  -7   1   10.40    1.10
  -7   7  -1   30.40    2.40
  -7   7  -1   29.60    1.70
   7  -7   1   29.70    2.50
   7  -7   1   30.60    2.00
   8  -7   1    0.20    1.90
  13   6  -1   28.70    2.50
 -13  -6   1   28.80    2.40
  12   6  -1    1.10    1.40
 -12  -6   1    2.20    1.20
  11   6  -1    6.50    1.40
 -11  -6   1    5.50    1.30
  10   6  -1   24.20    1.80
  10   6  -1   27.20    1.80
 -10  -6   1   25.80    1.70
   9   6  -1    3.90    0.90
   9   6  -1    5.00    0.90
  -9  -6   1    5.00    0.90
   8   6  -1  153.68    4.50
   8   6  -1  145.19    4.60
  -8  -6   1  145.09    4.50
  -8  -6   1  139.59    4.50
   7   6  -1   21.60    1.30
   7   6  -1   23.30    1.30
  -7  -6   1   25.70    1.40
  -7  -6   1   23.40    1.30
  -7  -6   1   23.60    1.40
  -7  -6   1   23.70    1.20
   6   6  -1   48.60    1.80
   6   6  -1   48.20    1.80
  -6  -6   1   49.20    1.90
  -6  -6   1   49.20    1.90
  -6  -6   1   51.19    1.90
  -6  -6   1   53.19    1.80
   5   6  -1   88.89    2.80
   5   6  -1   91.49    2.80
  -5  -6   1   86.89    2.90
  -5  -6   1   91.69    2.70
  -5  -6   1   87.39    2.80
  -5  -6   1   90.49    2.90
   4   6  -1   67.99    2.00
   4   6  -1   65.59    2.20
  -4  -6   1   60.79    2.30
  -4  -6   1   70.39    2.10
  -4  -6   1   67.19    2.20
   3   6  -1    3.50    0.60
   3   6  -1    3.90    0.50
   3   6  -1    4.20    0.40
  -3  -6   1    4.20    0.60
  -3  -6   1    5.10    0.60
  -3  -6   1    4.30    0.60
  -3  -6   1    4.00    0.50
   2   6  -1    0.40    0.40
   2   6  -1    0.30    0.30
  -2  -6   1    0.30    0.40
  -2  -6   1    0.40    0.50
  -2  -6   1    0.40    0.50
  -2  -6   1    0.40    0.30
   1   6  -1   60.29    1.90
   1   6  -1   56.19    2.10
  -1  -6   1   57.49    2.20
  -1  -6   1   61.09    1.90
   0   6  -1   59.59    1.90
   0   6  -1   57.89    2.10
   0  -6   1   57.99    2.20
   0  -6   1   60.69    1.90
  -1   6  -1  128.19    3.80
  -1   6  -1  129.29    4.10
   1  -6   1  137.89    3.80
   1  -6   1  134.39    4.20
  -2   6  -1    5.80    0.60
  -2   6  -1    5.30    0.80
   2  -6   1    5.00    0.80
   2  -6   1    3.70    0.50
  -3   6  -1    8.90    0.80
  -3   6  -1    9.20    1.00
   3  -6   1   10.30    0.80
   3  -6   1    9.50    1.20
  -4   6  -1   34.00    1.90
  -4   6  -1   35.50    1.40
   4  -6   1   35.00    2.00
   4  -6   1   34.40    1.50
  -5   6  -1   25.80    1.30
  -5   6  -1   24.80    1.70
   5  -6   1   24.40    1.40
   5  -6   1   27.30    1.80
  -6   6  -1  166.98    5.40
  -6   6  -1  153.78    4.70
   6  -6   1  163.68    4.90
   6  -6   1  151.88    5.40
  -7   6  -1   10.60    1.50
  -7   6  -1   11.30    1.20
   7  -6   1   10.10    1.70
   7  -6   1   10.20    1.10
  -8   6  -1    0.60    0.80
  -8   6  -1    0.50    1.50
   8  -6   1    0.70    1.00
   8  -6   1    1.30    1.40
  13   5  -1    1.20    1.50
 -13  -5   1    0.20    1.30
  12   5  -1    1.10    1.40
 -12  -5   1    0.70    1.10
 -12  -5   1    0.40    1.10
  11   5  -1    4.90    1.20
 -11  -5   1    5.10    1.10
 -11  -5   1    3.90    1.10
  10   5  -1   26.10    1.60
  10   5  -1   22.90    1.70
 -10  -5   1   28.20    1.70
 -10  -5   1   25.20    1.60
   9   5  -1   22.90    1.50
   9   5  -1   22.70    1.50
  -9  -5   1   24.30    1.50
  -9  -5   1   24.00    1.50
   8   5  -1  405.06   11.30
   8   5  -1  400.46   11.20
  -8  -5   1  419.36   11.20
  -8  -5   1  399.26   11.30
   7   5  -1  147.79    4.50
   7   5  -1  149.09    4.50
  -7  -5   1  151.08    4.50
  -7  -5   1  150.38    4.40
  -7  -5   1  153.68    4.50
  -7  -5   1  145.99    4.40
   6   5  -1    0.50    0.40
   6   5  -1    0.60    0.50
   6   5  -1    0.40    0.40
  -6  -5   1    0.70    0.50
  -6  -5   1    0.30    0.50
  -6  -5   1    0.40    0.40
  -6  -5   1    0.80    0.50
   5   5  -1   66.59    2.10
   5   5  -1   67.19    2.10
   5   5  -1   64.39    2.10
  -5  -5   1   60.59    2.20
  -5  -5   1   65.49    2.20
  -5  -5   1   66.69    2.10
  -5  -5   1   65.89    2.20
   4   5  -1    6.40    0.60
   4   5  -1    7.00    0.60
   4   5  -1    7.00    0.60
  -4  -5   1    6.00    0.50
  -4  -5   1    6.50    0.70
  -4  -5   1    6.10    0.60
  -4  -5   1    7.20    0.60
   3   5  -1   17.20    0.80
   3   5  -1   17.00    0.70
   3   5  -1   17.10    0.80
  -3  -5   1   16.30    0.80
  -3  -5   1   16.30    0.70
  -3  -5   1   17.70    0.90
  -3  -5   1   17.80    0.90
   2   5  -1    2.70    0.30
   2   5  -1    2.30    0.50
   2   5  -1    1.60    0.30
  -2  -5   1    2.30    0.40
  -2  -5   1    2.70    0.40
  -2  -5   1    2.30    0.50
  -2  -5   1    2.30    0.40
   1   5  -1  316.77    8.70
   1   5  -1  322.27    8.90
  -1  -5   1  329.27    9.00
  -1  -5   1  324.77    8.80
  -1  -5   1  323.27    8.70
   0   5  -1  322.57    9.30
   0   5  -1  343.67    9.10
   0  -5   1  331.77    9.10
   0  -5   1  340.07    9.40
   0  -5   1  349.37    9.20
  -1   5  -1  377.76   10.10
  -1   5  -1  365.16   10.30
   1  -5   1  394.56    9.90
   1  -5   1  355.16   10.00
   1  -5   1  374.06   10.20
   1  -5   1  379.36   10.40
  -2   5  -1   19.80    0.90
  -2   5  -1   19.10    1.10
   2  -5   1   19.80    1.20
   2  -5   1   19.20    0.90
   2  -5   1   20.90    0.90
  -3   5  -1  229.98    6.50
  -3   5  -1  244.18    6.90
   3  -5   1  242.98    6.60
   3  -5   1  232.28    7.00
  -4   5  -1  159.48    4.60
  -4   5  -1  153.28    4.90
   4  -5   1  154.18    5.00
   4  -5   1  164.48    4.60
  -5   5  -1  109.19    3.30
  -5   5  -1  113.29    3.80
   5  -5   1  106.89    3.40
   5  -5   1  107.59    3.90
  -6   5  -1  142.09    4.90
  -6   5  -1  155.48    4.50
   6  -5   1  148.39    4.50
   6  -5   1  147.89    5.00
  -7   5  -1    0.20    0.90
  -7   5  -1   -0.10    0.60
   7  -5   1   -0.10    0.70
   7  -5   1    0.00    1.10
  -8   5  -1   46.00    2.00
  -8   5  -1   48.40    2.80
   8  -5   1   43.80    2.60
   8  -5   1   50.49    2.30
  -9   5  -1    2.40    0.90
  -9   5  -1    2.50    1.50
   9  -5   1    2.00    1.60
   9  -5   1    2.80    1.40
  13   4  -1   35.50    2.70
 -13  -4   1   39.50    2.50
 -13  -4   1   34.80    2.60
  12   4  -1    0.70    1.20
 -12  -4   1    0.30    1.10
 -12  -4   1    1.30    1.20
  11   4  -1    1.50    1.10
 -11  -4   1    2.70    1.00
 -11  -4   1    3.50    1.10
  10   4  -1   90.79    3.40
 -10  -4   1   85.19    3.20
 -10  -4   1   88.69    3.10
   9   4  -1  219.88    6.50
   9   4  -1  210.68    6.60
  -9  -4   1  226.28    6.40
  -9  -4   1  219.68    6.60
   8   4  -1 1009.50   26.90
   8   4  -1  999.00   27.00
  -8  -4   1  995.30   27.00
  -8  -4   1 1026.70   26.90
   7   4  -1   32.90    1.50
   7   4  -1   34.00    1.30
   7   4  -1   31.40    1.50
  -7  -4   1   31.10    1.40
  -7  -4   1   31.80    1.40
  -7  -4   1   28.50    1.30
  -7  -4   1   32.40    1.30
   6   4  -1  185.68    5.20
   6   4  -1  181.68    5.30
   6   4  -1  177.48    5.30
  -6  -4   1  184.68    5.30
  -6  -4   1  184.88    5.20
  -6  -4   1  188.18    5.20
  -6  -4   1  183.58    5.30
   5   4  -1  128.39    3.80
   5   4  -1  131.49    3.90
   5   4  -1  133.49    3.70
  -5  -4   1  134.99    3.70
  -5  -4   1  127.69    3.80
  -5  -4   1  129.49    3.80
  -5  -4   1  132.09    3.90
   4   4  -1  728.93   19.20
   4   4  -1  706.63   19.20
  -4  -4   1  739.73   19.20
  -4  -4   1  718.33   19.30
  -4  -4   1  740.63   19.30
  -4  -4   1  717.33   19.20
   3   4  -1  562.04   15.00
   3   4  -1  560.74   14.90
   3   4  -1  559.24   15.00
  -3  -4   1  558.64   15.10
  -3  -4   1  589.24   15.00
  -3  -4   1  571.94   15.10
  -3  -4   1  552.94   15.00
   2   4  -1  156.78    4.10
   2   4  -1  149.29    4.30
   2   4  -1  150.38    4.20
  -2  -4   1  153.68    4.20
  -2  -4   1  147.59    4.30
  -2  -4   1  154.18    4.30
  -2  -4   1  153.98    4.30
   1   4  -1   17.80    0.70
   1   4  -1   17.90    0.80
  -1  -4   1   17.90    0.90
  -1  -4   1   20.60    0.70
   0   4  -1  161.88    4.50
   0   4  -1  157.88    4.40
   0  -4   1  161.08    4.60
   0  -4   1  155.18    4.30
  -1   4  -1  181.48    5.10
  -1   4  -1  176.78    5.30
   1  -4   1  182.48    5.40
   1  -4   1  189.88    5.10
   1  -4   1  200.78    5.00
  -2   4  -1    4.80    0.60
  -2   4  -1    5.30    0.50
   2  -4   1    5.60    0.50
   2  -4   1    5.80    0.70
   2  -4   1    6.00    0.50
  -3   4  -1   15.50    1.00
  -3   4  -1   18.70    0.80
   3  -4   1   18.10    0.90
   3  -4   1   16.40    0.80
   3  -4   1   20.10    1.10
  -4   4  -1   -0.10    0.30
  -4   4  -1    0.40    0.50
   4  -4   1    0.10    0.40
   4  -4   1    0.30    0.50
   4  -4   1    0.10    0.60
  -5   4  -1  233.88    6.90
  -5   4  -1  238.18    6.60
   5  -4   1  226.78    7.00
   5  -4   1  233.18    6.70
   5  -4   1  244.98    6.60
  -6   4  -1   11.40    0.90
  -6   4  -1   13.30    1.30
   6  -4   1   12.20    1.20
   6  -4   1   11.40    1.00
   6  -4   1   14.00    1.30
  -7   4  -1   50.49    2.00
  -7   4  -1   50.49    2.40
   7  -4   1   50.49    2.50
   7  -4   1   52.99    2.10
  -8   4  -1    1.00    1.00
  -8   4  -1    1.10    0.70
   8  -4   1    0.20    0.80
   8  -4   1    0.40    1.10
  -9   4  -1    0.40    0.80
  -9   4  -1    0.90    1.20
   9  -4   1    0.80    0.90
   9  -4   1   -0.30    1.40
 -10   4  -1    9.00    1.80
 -10   4  -1   11.50    1.30
  10  -4   1    9.20    1.90
  13   3  -1    6.30    2.10
 -13  -3   1    4.50    1.60
 -13  -3   1    2.60    1.40
  12   3  -1   -0.90    1.20
 -12  -3   1    0.20    1.10
 -12  -3   1    0.40    1.20
  11   3  -1    0.80    1.10
 -11  -3   1    0.50    0.90
 -11  -3   1    0.80    0.90
  10   3  -1    0.00    0.90
 -10  -3   1    0.20    0.80
 -10  -3   1   -0.40    0.80
   9   3  -1    3.30    0.90
   9   3  -1    2.70    0.90
  -9  -3   1    1.80    0.70
  -9  -3   1    2.30    0.80
   8   3  -1   37.70    1.80
   8   3  -1   42.70    1.90
  -8  -3   1   46.00    1.90
  -8  -3   1   40.70    1.70
  -8  -3   1   41.70    1.80
   7   3  -1   11.60    0.90
   7   3  -1   10.80    0.90
   7   3  -1   13.00    0.90
  -7  -3   1    9.50    0.80
  -7  -3   1   10.40    0.90
  -7  -3   1    9.60    0.90
  -7  -3   1   11.40    0.80
   6   3  -1    1.40    0.40
   6   3  -1    1.10    0.50
   6   3  -1    1.60    0.50
  -6  -3   1    1.50    0.40
  -6  -3   1    1.60    0.40
  -6  -3   1    1.40    0.50
  -6  -3   1    1.30    0.50
   5   3  -1    4.70    0.60
   5   3  -1    5.50    0.50
   5   3  -1    4.30    0.50
  -5  -3   1    5.70    0.50
  -5  -3   1    5.20    0.50
  -5  -3   1    5.60    0.60
  -5  -3   1    5.30    0.60
   4   3  -1  117.39    3.40
   4   3  -1  120.99    3.40
   4   3  -1  118.59    3.50
  -4  -3   1  118.19    3.40
  -4  -3   1  119.69    3.40
  -4  -3   1  120.19    3.50
  -4  -3   1  122.19    3.40
   3   3  -1  166.68    4.60
   3   3  -1  158.78    4.60
  -3  -3   1  164.08    4.60
  -3  -3   1  174.18    4.60
  -3  -3   1  166.28    4.60
   2   3  -1 1403.66   37.30
   2   3  -1 1487.05   37.40
  -2  -3   1 1421.26   37.40
  -2  -3   1 1431.16   37.40
  -2  -3   1 1414.86   37.30
  -2  -3   1 1398.46   37.40
   1   3  -1   24.60    0.80
   1   3  -1   23.20    0.90
  -1  -3   1   22.10    0.90
  -1  -3   1   23.50    0.80
   0   3  -1    1.10    0.30
   0   3  -1    1.30    0.20
   0  -3   1    1.70    0.20
   0  -3   1    1.10    0.30
  -1   3  -1   28.20    0.90
  -1   3  -1   29.30    1.10
   1  -3   1   28.70    1.10
   1  -3   1   28.70    0.90
   1  -3   1   29.90    0.90
  -2   3  -1   67.29    2.20
  -2   3  -1   66.69    2.00
   2  -3   1   68.69    2.00
   2  -3   1   66.49    2.00
   2  -3   1   67.09    2.20
  -3   3  -1   31.20    1.30
  -3   3  -1   31.40    1.10
   3  -3   1   34.40    1.40
   3  -3   1   32.10    1.20
   3  -3   1   33.30    1.40
   3  -3   1   33.60    1.10
  -4   3  -1  109.29    3.50
  -4   3  -1  114.29    3.30
   4  -3   1  113.99    3.60
   4  -3   1  113.49    3.40
   4  -3   1  114.79    3.30
  -5   3  -1   73.69    2.60
  -5   3  -1   75.39    2.40
   5  -3   1   78.79    2.70
   5  -3   1   74.29    2.40
   5  -3   1   75.89    2.50
  -6   3  -1  298.37    8.30
  -6   3  -1  299.37    8.70
   6  -3   1  298.77    8.70
   6  -3   1  309.67    8.50
   6  -3   1  303.57    8.30
  -7   3  -1    5.70    0.70
  -7   3  -1    4.70    0.90
   7  -3   1    7.20    1.10
   7  -3   1    4.40    0.70
   7  -3   1    5.20    1.00
  -8   3  -1    0.50    0.60
  -8   3  -1   -0.20    0.80
   8  -3   1   -0.10    0.90
   8  -3   1   -0.10    0.90
   8  -3   1    0.10    0.70
  -9   3  -1   22.80    1.90
  -9   3  -1   21.30    1.40
   9  -3   1   23.70    1.80
   9  -3   1   22.20    1.60
   9  -3   1   25.10    2.10
 -10   3  -1    9.60    1.60
 -10   3  -1    8.80    1.10
  10  -3   1   11.80    1.90
 -13  -2   1   13.50    1.80
  12   2  -1   -0.30    1.40
 -12  -2   1    0.90    1.10
 -12  -2   1   -0.10    1.20
  11   2  -1    0.50    1.20
 -11  -2   1    0.30    1.00
 -11  -2   1    0.60    0.90
  10   2  -1   11.90    1.40
 -10  -2   1   10.50    1.20
 -10  -2   1    9.60    1.30
   9   2  -1    4.90    1.00
  -9  -2   1    4.00    0.90
  -9  -2   1    5.30    0.90
   8   2  -1    0.30    0.50
   8   2  -1    0.20    0.60
   8   2  -1    0.50    0.60
  -8  -2   1    0.10    0.60
  -8  -2   1    0.10    0.60
  -8  -2   1    0.20    0.60
   7   2  -1   39.60    1.70
   7   2  -1   42.60    1.60
   7   2  -1   43.80    1.80
  -7  -2   1   39.90    1.70
  -7  -2   1   39.40    1.60
  -7  -2   1   43.60    1.70
  -7  -2   1   44.50    1.60
   6   2  -1    4.70    0.60
   6   2  -1    4.90    0.70
   6   2  -1    6.50    0.60
  -6  -2   1    5.60    0.70
  -6  -2   1    6.30    0.60
  -6  -2   1    5.50    0.70
  -6  -2   1    5.30    0.60
   5   2  -1   44.50    1.60
   5   2  -1   46.10    1.50
   5   2  -1   47.80    1.70
  -5  -2   1   43.70    1.50
  -5  -2   1   46.90    1.50
  -5  -2   1   46.30    1.60
  -5  -2   1   46.80    1.50
   4   2  -1    0.00    0.30
   4   2  -1    0.00    0.30
   4   2  -1    0.00    0.20
  -4  -2   1   -0.10    0.30
  -4  -2   1    0.10    0.20
  -4  -2   1    0.20    0.30
  -4  -2   1    0.10    0.30
   3   2  -1   70.79    2.00
   3   2  -1   69.29    2.10
   3   2  -1   67.69    2.00
  -3  -2   1   72.69    2.10
  -3  -2   1   69.29    2.00
  -3  -2   1   69.39    2.00
  -3  -2   1   67.79    2.10
   2   2  -1   18.10    0.70
   2   2  -1   20.60    0.70
  -2  -2   1   19.80    0.70
  -2  -2   1   19.30    0.70
  -2  -2   1   19.50    0.80
  -2  -2   1   19.10    0.60
   1   2  -1    0.00    0.20
   1   2  -1    0.00    0.10
   1   2  -1    0.10    0.10
  -1  -2   1    0.10    0.20
  -1  -2   1    0.00    0.20
  -1  -2   1    0.00    0.10
   0   2  -1   19.60    0.70
   0   2  -1   21.10    0.60
   0  -2   1   19.70    0.60
   0  -2   1   19.60    0.80
  -1   2  -1  216.28    5.90
  -1   2  -1  218.58    5.80
   1  -2   1  217.88    5.90
   1  -2   1  227.08    5.70
   1  -2   1  199.28    5.70
  -2   2  -1  651.53   16.70
  -2   2  -1  612.54   16.90
   2  -2   1  619.64   16.70
   2  -2   1  629.14   16.90
   2  -2   1  660.53   16.80
  -3   2  -1    0.70    0.30
  -3   2  -1    0.60    0.20
  -3   2  -1    0.80    0.40
   3  -2   1    0.50    0.20
   3  -2   1    0.80    0.40
   3  -2   1    0.40    0.30
  -4   2  -1    0.10    0.40
  -4   2  -1    0.40    0.30
  -4   2  -1    0.20    0.40
   4  -2   1    0.40    0.30
   4  -2   1    0.20    0.30
   4  -2   1    0.50    0.40
   4  -2   1    0.20    0.40
  -5   2  -1    2.00    0.40
  -5   2  -1    2.90    0.70
  -5   2  -1    2.80    0.70
   5  -2   1    2.50    0.40
   5  -2   1    3.20    0.60
   5  -2   1    3.40    0.70
  -6   2  -1   34.30    1.60
  -6   2  -1   32.80    1.60
  -6   2  -1   35.40    1.40
   6  -2   1   34.10    1.60
   6  -2   1   35.40    1.40
   6  -2   1   33.70    1.70
  -7   2  -1   47.70    2.10
  -7   2  -1   51.39    1.90
   7  -2   1   50.19    2.10
   7  -2   1   48.30    2.20
   7  -2   1   51.39    1.90
  -8   2  -1    1.40    0.60
  -8   2  -1    2.00    0.90
   8  -2   1    1.40    0.60
   8  -2   1    1.70    0.80
   8  -2   1    1.90    0.90
  -9   2  -1   18.50    1.30
  -9   2  -1   18.70    1.70
   9  -2   1   19.60    1.80
   9  -2   1   18.60    1.40
   9  -2   1   17.20    1.80
 -10   2  -1    7.20    1.00
 -10   2  -1    7.10    1.50
  10  -2   1    8.40    1.60
  10  -2   1    9.80    1.60
  10  -2   1    9.00    1.20
 -11   2  -1   13.50    1.90
 -11   2  -1   13.90    1.60
  11  -2   1   12.50    1.90
  12   1  -1    3.40    1.60
 -12  -1   1    3.00    1.40
 -12  -1   1    3.40    1.20
  11   1  -1    7.70    1.60
 -11  -1   1    7.70    1.40
 -11  -1   1   10.10    1.30
  10   1  -1    9.80    1.40
 -10  -1   1   10.20    1.30
 -10  -1   1   10.50    1.20
   9   1  -1    1.80    0.90
  -9  -1   1    2.80    0.90
  -9  -1   1    2.70    0.80
   8   1  -1    0.40    0.70
   8   1  -1    0.80    0.60
   8   1  -1    0.30    0.60
   8   1  -1    0.50    1.10
  -8  -1   1    0.50    0.60
  -8  -1   1    0.50    0.60
  -8  -1   1    0.60    0.70
   7   1  -1   21.50    1.30
   7   1  -1   20.10    1.20
   7   1  -1   21.40    1.10
   7   1  -1   23.80    1.20
  -7  -1   1   22.60    1.20
  -7  -1   1   26.60    1.30
  -7  -1   1   23.20    1.20
   6   1  -1    2.70    0.40
   6   1  -1    2.20    0.60
   6   1  -1    2.00    0.50
  -6  -1   1    2.40    0.50
  -6  -1   1    2.20    0.50
  -6  -1   1    1.90    0.40
  -6  -1   1    2.30    0.50
   5   1  -1   31.10    1.10
   5   1  -1   31.60    1.30
   5   1  -1   31.30    1.20
  -5  -1   1   30.30    1.20
  -5  -1   1   29.10    1.20
  -5  -1   1   32.90    1.30
  -5  -1   1   34.40    1.20
   4   1  -1   11.60    0.70
   4   1  -1   10.20    0.60
  -4  -1   1   10.80    0.60
  -4  -1   1   11.90    0.60
  -4  -1   1   11.60    0.60
  -4  -1   1   10.60    0.60
   3   1  -1  174.98    4.80
   3   1  -1  175.58    4.80
   3   1  -1  173.48    4.90
  -3  -1   1  174.38    4.80
  -3  -1   1  186.88    4.80
  -3  -1   1  179.98    4.90
  -3  -1   1  177.08    4.80
   2   1  -1  504.95   13.30
   2   1  -1  516.55   13.30
   2   1  -1  503.65   13.30
  -2  -1   1  483.75   13.20
  -2  -1   1  507.35   13.30
  -2  -1   1  512.55   13.20
  -2  -1   1  498.55   13.30
   1   1  -1  360.46    9.50
   1   1  -1  365.96    9.50
  -1  -1   1  356.66    9.50
   0   1  -1  157.18    4.10
   0   1  -1  161.58    4.20
   0   1  -1  153.58    4.10
   0  -1   1  153.98    4.10
   0  -1   1  153.08    4.20
  -1   1  -1  720.53   19.60
  -1   1  -1  736.53   19.60
  -1   1  -1  769.92   19.70
  -1   1  -1  774.42   19.80
   1  -1   1  754.62   19.70
   1  -1   1  735.93   19.60
   1  -1   1  759.82   19.80
  -2   1  -1   29.80    1.10
  -2   1  -1   29.90    1.00
  -2   1  -1   29.00    0.90
   2  -1   1   29.20    1.00
   2  -1   1   30.80    0.90
   2  -1   1   29.70    1.10
  -3   1  -1    8.40    0.40
  -3   1  -1   10.10    0.60
  -3   1  -1   10.60    0.60
   3  -1   1    8.90    0.50
   3  -1   1   10.30    0.50
   3  -1   1    9.80    0.60
  -4   1  -1    1.20    0.40
  -4   1  -1    1.60    0.30
  -4   1  -1    1.40    0.40
   4  -1   1    1.40    0.40
   4  -1   1    1.30    0.40
   4  -1   1    2.10    0.40
   4  -1   1    1.80    0.30
  -5   1  -1   61.09    2.10
  -5   1  -1   67.69    2.40
  -5   1  -1   68.49    2.30
   5  -1   1   70.09    2.10
   5  -1   1   74.19    2.30
   5  -1   1   70.79    2.40
   5  -1   1   65.79    2.30
  -6   1  -1    4.60    0.70
  -6   1  -1    4.20    0.70
  -6   1  -1    4.10    0.50
   6  -1   1    4.80    0.50
   6  -1   1    4.40    0.70
   6  -1   1    4.80    0.70
  -7   1  -1    9.80    1.10
  -7   1  -1   10.70    0.80
  -7   1  -1   11.30    1.00
   7  -1   1    9.90    0.80
   7  -1   1    9.40    1.00
   7  -1   1    9.50    1.10
  -8   1  -1   50.29    1.80
  -8   1  -1   47.10    2.10
  -8   1  -1   52.09    2.30
   8  -1   1   47.10    2.10
   8  -1   1   46.80    2.10
   8  -1   1   44.20    1.80
  -9   1  -1   12.40    1.40
  -9   1  -1    9.80    1.30
  -9   1  -1   11.40    1.10
   9  -1   1   10.90    1.40
   9  -1   1    9.10    1.00
   9  -1   1   11.10    1.30
 -10   1  -1    1.90    1.10
 -10   1  -1    2.10    0.80
  10  -1   1    2.50    1.30
  10  -1   1    2.20    1.20
  10  -1   1    2.10    0.90
 -11   1  -1   15.80    1.90
 -11   1  -1   14.50    1.50
  11  -1   1   15.60    1.90
  12  -1   1    0.10    1.90
  12   0  -1    6.30    2.00
 -12   0   1    5.90    1.40
 -12   0   1    7.00    1.70
  11   0  -1   20.10    2.00
 -11   0   1   21.10    1.70
 -11   0   1   16.50    1.80
  10   0  -1   12.90    1.60
 -10   0   1   14.50    1.40
 -10   0   1   15.70    1.50
   9   0  -1   15.00    1.50
  -9   0   1   17.10    1.30
  -9   0   1   15.90    1.40
   8   0  -1   78.99    2.70
   8   0  -1   78.49    2.60
   8   0  -1   77.69    2.90
  -8   0   1   75.29    2.80
  -8   0   1   76.59    2.60
  -8   0   1   72.59    2.70
   7   0  -1   10.90    0.90
   7   0  -1    9.30    1.00
   7   0  -1    9.90    1.00
   7   0  -1   10.70    0.90
  -7   0   1    9.90    1.00
  -7   0   1    8.90    0.80
  -7   0   1   11.10    1.00
   6   0  -1  109.39    3.20
   6   0  -1  110.99    3.40
   6   0  -1  105.69    3.40
   6   0  -1  112.79    3.40
  -6   0   1  114.49    3.20
  -6   0   1  103.39    3.30
  -6   0   1  109.09    3.30
  -6   0   1  104.69    3.40
   5   0  -1   26.30    1.20
   5   0  -1   25.40    1.20
   5   0  -1   28.20    1.10
   5   0  -1   28.40    1.00
  -5   0   1   24.60    1.10
  -5   0   1   29.60    1.10
  -5   0   1   23.40    1.10
  -5   0   1   23.70    1.10
   4   0  -1    4.10    0.40
   4   0  -1    4.50    0.40
   4   0  -1    3.50    0.50
   4   0  -1    4.30    0.50
  -4   0   1    4.80    0.40
  -4   0   1    3.70    0.50
  -4   0   1    4.10    0.50
  -4   0   1    4.30    0.40
   3   0  -1    2.70    0.30
   3   0  -1    3.10    0.30
   3   0  -1    2.30    0.30
   3   0  -1    2.50    0.30
  -3   0   1    3.00    0.30
  -3   0   1    3.00    0.30
  -3   0   1    3.10    0.40
  -3   0   1    2.50    0.30
   2   0  -1  146.19    4.00
   2   0  -1  149.79    4.00
   2   0  -1  149.29    4.10
   2   0  -1  145.79    4.00
  -2   0   1  148.89    4.00
  -2   0   1  142.09    4.00
  -2   0   1  148.59    4.00
  -2   0   1  146.79    4.00
   1   0  -1  118.69    3.20
   1   0  -1  117.69    3.10
  -1   0   1  115.69    3.10
  -1   0   1  111.79    3.10
   0   0  -1   71.89    2.00
  -1   0  -1  153.78    4.10
  -1   0  -1  159.48    4.20
   1   0   1  150.68    4.10
   1   0   1  154.78    4.10
  -2   0  -1    9.80    0.50
  -2   0  -1    8.90    0.40
  -2   0  -1    9.90    0.40
   2   0   1    8.90    0.30
   2   0   1    9.30    0.50
  -3   0  -1   34.90    1.10
  -3   0  -1   34.10    1.20
  -3   0  -1   34.80    1.20
   3   0   1   32.00    1.20
   3   0   1   36.20    1.10
  -4   0  -1   90.19    2.80
  -4   0  -1   95.09    2.80
  -4   0  -1   90.49    2.70
   4   0   1   96.99    2.70
   4   0   1   93.09    2.80
   4   0   1   91.79    2.60
  -5   0  -1  239.18    6.80
  -5   0  -1  250.27    6.80
  -5   0  -1  235.58    6.60
   5   0   1  253.57    6.70
   5   0   1  228.88    6.70
   5   0   1  240.68    6.60
  -6   0  -1    2.60    0.40
  -6   0  -1    2.70    0.60
  -6   0  -1    3.40    0.60
   6   0   1    3.20    0.50
   6   0   1    3.50    0.60
   6   0   1    2.90    0.70
   6   0   1    2.30    0.60
  -7   0  -1   11.30    1.10
  -7   0  -1   11.10    1.00
  -7   0  -1    9.60    0.80
   7   0   1   10.70    1.00
   7   0   1    9.80    0.80
   7   0   1   10.00    1.00
  -8   0  -1    0.30    0.50
  -8   0  -1    0.10    0.60
  -8   0  -1    0.40    0.80
   8   0   1    0.10    0.70
   8   0   1    0.80    0.60
   8   0   1    0.70    0.70
  -9   0  -1   40.10    1.70
  -9   0  -1   40.20    2.10
  -9   0  -1   43.20    2.10
   9   0   1   40.40    2.10
   9   0   1   40.90    1.80
   9   0   1   43.80    2.10
 -10   0  -1   18.70    1.40
 -10   0  -1   20.20    1.90
 -10   0  -1   19.50    1.80
  10   0   1   18.70    1.60
  10   0   1   20.30    1.50
  10   0   1   19.80    1.80
 -11   0  -1    2.00    0.90
 -11   0  -1    3.00    1.20
  11   0   1    2.30    1.30
 -12   0  -1   32.70    2.50
 -12   0  -1   30.30    2.10
  12   0   1   35.80    2.90
  12  -1  -1   10.60    2.10
 -12   1   1    9.00    1.50
  11  -1  -1   12.60    1.90
 -11   1   1    7.90    1.60
 -11   1   1   11.70    1.40
  10  -1  -1    0.20    1.20
 -10   1   1   -0.10    1.00
 -10   1   1   -0.30    0.80
   9  -1  -1    1.00    1.00
  -9   1   1    0.60    0.90
  -9   1   1    0.50    0.70
   8  -1  -1    7.60    0.90
   8  -1  -1   10.00    1.20
   8  -1  -1    9.10    1.20
  -8   1   1    9.40    1.00
  -8   1   1    7.20    1.00
   7  -1  -1    8.90    1.00
   7  -1  -1   10.90    0.90
   7  -1  -1   11.00    1.10
  -7   1   1   11.00    1.00
  -7   1   1   10.60    0.90
   6  -1  -1   30.60    1.50
   6  -1  -1   33.30    1.50
   6  -1  -1   36.70    1.40
   6  -1  -1   35.30    1.40
  -6   1   1   30.20    1.30
  -6   1   1   34.80    1.50
   5  -1  -1    5.10    0.70
   5  -1  -1    5.40    0.70
   5  -1  -1    6.50    0.60
   5  -1  -1    4.60    0.60
  -5   1   1    5.70    0.60
  -5   1   1    5.00    0.60
  -5   1   1    5.70    0.70
  -5   1   1    6.50    0.60
   4  -1  -1  314.37    8.40
   4  -1  -1  320.27    8.50
   4  -1  -1  316.27    8.50
   4  -1  -1  301.57    8.60
  -4   1   1  322.87    8.40
  -4   1   1  305.47    8.50
  -4   1   1  307.27    8.60
   3  -1  -1    0.00    0.30
   3  -1  -1    0.00    0.30
   3  -1  -1    0.10    0.20
   3  -1  -1    0.10    0.20
  -3   1   1   -0.10    0.20
  -3   1   1    0.10    0.20
  -3   1   1    0.20    0.30
   2  -1  -1  133.19    3.50
   2  -1  -1  123.19    3.60
   2  -1  -1  133.79    3.60
   2  -1  -1  124.29    3.60
  -2   1   1  126.29    3.50
  -2   1   1  130.59    3.60
  -2   1   1  126.59    3.50
   1  -1  -1  256.07    7.00
   1  -1  -1  265.47    7.00
   1  -1  -1  260.57    7.00
   1  -1  -1  269.77    7.00
  -1   1   1  265.27    7.00
  -1   1   1  263.77    7.00
  -1   1   1  265.07    7.00
   0  -1  -1   12.70    0.40
   0  -1  -1   11.60    0.40
   0  -1  -1   12.80    0.40
   0   1   1   12.50    0.40
  -1  -1  -1   90.69    2.40
  -1  -1  -1   84.99    2.40
  -1  -1  -1   91.79    2.40
   1   1   1   84.29    2.40
   1   1   1   86.79    2.30
  -2  -1  -1 1072.29   27.50
  -2  -1  -1  996.80   27.40
  -2  -1  -1 1055.79   27.50
   2   1   1 1052.29   27.40
   2   1   1 1063.89   27.50
  -3  -1  -1  463.75   12.30
  -3  -1  -1  468.55   12.20
  -3  -1  -1  463.35   12.20
   3   1   1  466.55   12.30
   3   1   1  441.86   12.10
  -4  -1  -1 1772.32   48.20
  -4  -1  -1 1845.12   48.40
  -4  -1  -1 1794.42   48.30
   4   1   1 1861.71   48.20
   4   1   1 1928.91   48.30
   4   1   1 1846.52   48.30
  -5  -1  -1   14.30    0.90
  -5  -1  -1   13.30    0.80
  -5  -1  -1   13.50    0.70
  -5  -1  -1   12.80    0.70
   5   1   1   14.10    0.80
   5   1   1   14.80    0.70
   5   1   1   14.30    0.80
  -6  -1  -1   24.60    1.00
  -6  -1  -1   25.90    1.20
  -6  -1  -1   25.40    1.20
   6   1   1   24.80    1.20
   6   1   1   27.20    1.20
   6   1   1   25.90    1.00
  -7  -1  -1    3.40    0.70
  -7  -1  -1    2.20    0.50
  -7  -1  -1    1.80    0.60
   7   1   1    1.90    0.40
   7   1   1    1.30    0.60
  -8  -1  -1   63.19    2.50
  -8  -1  -1   66.19    2.20
  -8  -1  -1   61.99    2.40
   8   1   1   68.69    2.60
   8   1   1   66.39    2.20
  -9  -1  -1    1.90    0.80
  -9  -1  -1    1.80    0.60
  -9  -1  -1    1.80    0.80
   9   1   1    1.90    0.70
   9   1   1    2.10    0.80
   9   1   1    1.50    0.90
 -10  -1  -1    2.80    1.10
 -10  -1  -1    1.80    1.00
 -10  -1  -1    1.70    0.70
  10   1   1    2.20    1.00
  10   1   1    2.30    0.80
  10   1   1    2.40    1.00
 -11  -1  -1   26.60    1.70
 -11  -1  -1   24.70    2.10
  11   1   1   31.50    2.10
 -12  -1  -1   25.20    1.90
 -12  -1  -1   22.20    2.30
  12   1   1   23.00    2.20
  11  -2  -1    8.50    1.80
 -11   2   1    8.70    1.80
 -11   2   1    8.80    1.40
  10  -2  -1    8.30    1.50
 -10   2   1    8.70    1.50
 -10   2   1   10.60    1.30
   9  -2  -1    3.90    1.20
  -9   2   1    3.60    0.90
  -9   2   1    3.70    1.10
   8  -2  -1   17.10    1.50
   8  -2  -1   16.70    1.30
   8  -2  -1   18.70    1.50
  -8   2   1   18.00    1.30
  -8   2   1   18.10    1.50
   7  -2  -1    4.80    0.70
   7  -2  -1    3.80    0.80
   7  -2  -1    4.00    0.90
  -7   2   1    4.40    0.70
  -7   2   1    3.40    0.80
   6  -2  -1    0.50    0.60
   6  -2  -1    0.00    0.60
   6  -2  -1    0.00    0.40
  -6   2   1   -0.20    0.50
  -6   2   1    0.20    0.50
   5  -2  -1   25.40    1.30
   5  -2  -1   27.40    1.10
   5  -2  -1   23.80    1.20
   5  -2  -1   25.00    1.20
  -5   2   1   25.00    1.10
  -5   2   1   25.00    1.20
   4  -2  -1  317.87    8.80
   4  -2  -1  315.87    8.70
   4  -2  -1  323.47    8.80
   4  -2  -1  313.27    8.80
  -4   2   1  343.87    8.70
  -4   2   1  312.07    8.70
  -4   2   1  320.77    8.90
   3  -2  -1  153.98    4.30
   3  -2  -1  157.18    4.40
   3  -2  -1  154.68    4.30
   3  -2  -1  153.58    4.40
  -3   2   1  149.39    4.40
  -3   2   1  155.08    4.20
  -3   2   1  151.58    4.30
   2  -2  -1    0.20    0.20
   2  -2  -1    0.70    0.30
   2  -2  -1    0.40    0.20
   2  -2  -1    0.60    0.30
  -2   2   1    1.10    0.30
  -2   2   1    0.60    0.20
  -2   2   1    0.20    0.20
   1  -2  -1   75.49    2.20
   1  -2  -1   73.29    2.10
   1  -2  -1   76.29    2.20
   1  -2  -1   73.39    2.10
  -1   2   1   76.09    2.10
  -1   2   1   74.89    2.10
   0  -2  -1   72.39    2.00
   0  -2  -1   73.99    2.10
   0  -2  -1   72.39    2.00
   0  -2  -1   74.39    2.10
   0   2   1   74.19    2.00
   0   2   1   74.29    2.00
   0   2   1   72.99    2.10
  -1  -2  -1  445.16   11.80
  -1  -2  -1  443.26   11.70
  -1  -2  -1  456.45   11.80
  -1  -2  -1  445.06   11.90
   1   2   1  435.06   11.70
   1   2   1  454.55   11.80
   1   2   1  453.85   11.80
  -2  -2  -1  756.72   20.30
  -2  -2  -1  763.82   20.40
  -2  -2  -1  776.42   20.30
  -2  -2  -1  785.62   20.40
   2   2   1  756.72   20.40
   2   2   1  797.12   20.40
   2   2   1  791.52   20.30
  -3  -2  -1  386.06   10.10
  -3  -2  -1  384.96   10.20
  -3  -2  -1  369.86   10.10
  -3  -2  -1  381.96   10.10
   3   2   1  381.66   10.20
   3   2   1  363.86   10.10
   3   2   1  389.56   10.10
  -4  -2  -1   96.49    2.70
  -4  -2  -1   95.49    2.70
  -4  -2  -1   94.49    2.80
  -4  -2  -1   92.29    2.80
   4   2   1   95.69    2.80
   4   2   1   94.69    2.70
   4   2   1   95.39    2.70
  -5  -2  -1   28.30    1.20
  -5  -2  -1   29.50    1.10
  -5  -2  -1   28.80    1.10
  -5  -2  -1   29.20    1.10
   5   2   1   29.00    1.00
   5   2   1   31.20    1.20
   5   2   1   30.30    1.20
  -6  -2  -1  114.89    3.40
  -6  -2  -1  117.49    3.30
  -6  -2  -1  117.09    3.50
  -6  -2  -1  114.49    3.50
   6   2   1  111.09    3.50
   6   2   1  111.69    3.30
   6   2   1  117.99    3.40
  -7  -2  -1    5.00    0.70
  -7  -2  -1    5.70    0.80
  -7  -2  -1    5.60    0.70
   7   2   1    5.50    0.70
   7   2   1    4.80    0.70
  -8  -2  -1  121.29    3.70
  -8  -2  -1  124.19    3.80
  -8  -2  -1  120.99    3.90
   8   2   1  114.59    3.60
   8   2   1  117.69    3.90
  -9  -2  -1    1.20    0.80
  -9  -2  -1    0.50    0.60
  -9  -2  -1    0.60    0.80
   9   2   1    0.60    0.80
   9   2   1    1.00    0.60
 -10  -2  -1    7.30    0.90
 -10  -2  -1    8.10    1.30
 -10  -2  -1    8.80    1.20
  10   2   1    8.70    1.20
  10   2   1    7.60    1.00
  10   2   1    8.50    1.20
 -11  -2  -1   10.50    1.10
 -11  -2  -1   10.20    1.30
  11   2   1   10.80    1.50
 -12  -2  -1    1.20    1.20
 -12  -2  -1    1.30    1.00
  12   2   1    1.70    1.40
 -13  -2  -1    6.90    1.40
 -13  -2  -1    8.00    1.90
  13   2   1    8.90    2.10
  11  -3  -1   25.90    2.60
  10  -3  -1    4.40    1.50
 -10   3   1    4.40    1.50
 -10   3   1    5.50    1.20
   9  -3  -1    0.20    1.20
  -9   3   1    0.10    0.80
  -9   3   1    1.00    1.10
   8  -3  -1   64.89    2.70
   8  -3  -1   63.69    2.70
  -8   3   1   63.79    2.70
  -8   3   1   60.29    2.40
   7  -3  -1    1.20    0.90
   7  -3  -1    1.10    0.60
   7  -3  -1    1.10    0.80
  -7   3   1    2.20    0.70
  -7   3   1    1.00    0.80
   6  -3  -1   21.10    1.40
   6  -3  -1   23.30    1.40
   6  -3  -1   20.40    1.20
  -6   3   1   24.00    1.40
  -6   3   1   24.00    1.20
   5  -3  -1    9.20    0.90
   5  -3  -1   11.40    0.80
   5  -3  -1    9.30    0.90
   5  -3  -1   12.00    1.30
  -5   3   1    9.10    0.90
   4  -3  -1   45.50    1.60
   4  -3  -1   44.30    1.70
   4  -3  -1   45.00    1.70
   4  -3  -1   45.60    1.70
  -4   3   1   46.40    1.60
  -4   3   1   45.20    1.80
  -4   3   1   44.00    1.60
   3  -3  -1   23.50    1.10
   3  -3  -1   24.40    0.90
   3  -3  -1   21.70    1.00
   3  -3  -1   24.20    1.10
  -3   3   1   19.10    1.00
  -3   3   1   21.80    1.00
  -3   3   1   25.60    1.00
   2  -3  -1  267.27    7.10
   2  -3  -1  257.07    7.10
   2  -3  -1  263.07    7.00
   2  -3  -1  261.37    7.20
  -2   3   1  255.97    7.10
  -2   3   1  253.97    7.10
  -2   3   1  259.67    7.00
   1  -3  -1  106.89    3.00
   1  -3  -1  108.39    3.10
   1  -3  -1  109.39    3.00
   1  -3  -1  108.99    3.10
  -1   3   1  102.39    3.00
  -1   3   1  100.09    3.00
  -1   3   1  107.49    3.00
   0  -3  -1  555.74   14.70
   0  -3  -1  558.54   14.60
   0  -3  -1  544.95   14.50
   0   3   1  548.15   14.60
   0   3   1  544.55   14.60
   0   3   1  556.54   14.50
  -1  -3  -1  827.82   21.70
  -1  -3  -1  839.02   21.80
  -1  -3  -1  819.22   21.70
  -1  -3  -1  801.92   21.90
   1   3   1  822.22   21.70
   1   3   1  836.12   21.80
   1   3   1  846.52   21.70
  -2  -3  -1  327.27    8.80
  -2  -3  -1  341.57    8.80
  -2  -3  -1  324.17    8.90
  -2  -3  -1  343.77    8.70
   2   3   1  323.77    8.80
   2   3   1  322.17    8.80
   2   3   1  322.67    8.70
  -3  -3  -1  885.71   23.50
  -3  -3  -1  896.41   23.40
  -3  -3  -1  888.91   23.40
  -3  -3  -1  898.61   23.60
   3   3   1  849.32   23.50
   3   3   1  912.31   23.50
   3   3   1  908.71   23.40
  -4  -3  -1   77.09    2.30
  -4  -3  -1   78.29    2.30
  -4  -3  -1   76.29    2.40
  -4  -3  -1   82.29    2.30
   4   3   1   79.39    2.30
   4   3   1   77.79    2.30
   4   3   1   78.29    2.40
  -5  -3  -1   85.29    2.50
  -5  -3  -1   84.99    2.60
  -5  -3  -1   86.39    2.60
  -5  -3  -1   82.89    2.50
   5   3   1   83.09    2.50
   5   3   1   82.59    2.50
   5   3   1   82.69    2.60
  -6  -3  -1   49.50    1.80
  -6  -3  -1   51.89    1.80
  -6  -3  -1   58.29    1.70
  -6  -3  -1   50.79    1.90
   6   3   1   53.69    1.90
   6   3   1   50.49    1.80
  -7  -3  -1   50.89    1.80
  -7  -3  -1   47.60    1.90
  -7  -3  -1   50.89    1.90
   7   3   1   50.09    2.00
   7   3   1   49.10    1.90
   7   3   1   51.79    1.70
  -8  -3  -1    3.70    0.70
  -8  -3  -1    2.80    0.60
  -8  -3  -1    2.60    0.70
   8   3   1    3.70    0.80
   8   3   1    3.10    0.60
  -9  -3  -1    0.10    0.60
  -9  -3  -1   -0.30    0.60
  -9  -3  -1   -0.10    0.80
   9   3   1   -0.10    0.60
   9   3   1   -0.30    0.70
 -10  -3  -1    2.30    0.70
 -10  -3  -1    4.50    1.10
 -10  -3  -1    2.60    0.90
  10   3   1    2.80    1.00
  10   3   1    3.50    0.80
 -11  -3  -1    9.70    1.30
 -11  -3  -1    7.60    1.00
  11   3   1    8.20    1.40
 -12  -3  -1    0.60    0.90
 -12  -3  -1    0.10    1.20
  12   3   1    0.70    1.20
 -13  -3  -1   -0.30    1.50
 -13  -3  -1    0.10    1.10
  13   3   1   -0.60    1.50
 -10   4   1    0.00    1.40
 -10   4   1    0.70    1.10
  -9   4   1    6.60    1.40
  -9   4   1    5.60    1.10
   8  -4  -1   14.90    1.80
   8  -4  -1   14.70    1.70
  -8   4   1   16.40    1.40
  -8   4   1   15.30    1.60
   7  -4  -1    0.30    0.80
   7  -4  -1    0.50    0.90
   7  -4  -1    0.50    0.70
  -7   4   1   -0.10    0.80
  -7   4   1    0.30    0.70
   6  -4  -1   17.70    1.20
   6  -4  -1   18.60    1.40
   6  -4  -1   18.30    1.50
  -6   4   1   19.00    1.40
  -6   4   1   16.60    1.10
   5  -4  -1   12.80    1.10
   5  -4  -1   12.40    0.90
   5  -4  -1   13.60    1.20
  -5   4   1   13.10    1.00
  -5   4   1   13.40    1.10
   4  -4  -1   14.10    1.00
   4  -4  -1   13.20    1.00
   4  -4  -1   13.40    0.90
   4  -4  -1   14.80    1.30
  -4   4   1   13.80    0.90
  -4   4   1   13.70    1.00
   3  -4  -1    4.40    0.60
   3  -4  -1    3.80    0.60
   3  -4  -1    4.30    0.60
   3  -4  -1    4.80    0.50
  -3   4   1    3.20    0.60
  -3   4   1    3.60    0.50
  -3   4   1    4.90    0.50
   2  -4  -1   38.40    1.40
   2  -4  -1   38.10    1.40
   2  -4  -1   40.40    1.60
   2  -4  -1   41.40    1.50
  -2   4   1   48.40    1.60
  -2   4   1   42.90    1.40
  -2   4   1   39.80    1.40
   1  -4  -1   63.89    2.20
   1  -4  -1   63.19    1.90
   1  -4  -1   63.39    1.90
   1  -4  -1   61.89    2.00
  -1   4   1   65.99    2.00
  -1   4   1   61.99    2.00
  -1   4   1   66.59    1.90
   0  -4  -1    0.20    0.20
   0  -4  -1    0.60    0.30
   0  -4  -1    1.50    0.30
   0  -4  -1    0.60    0.30
   0   4   1    0.60    0.20
   0   4   1    0.50    0.30
   0   4   1    0.30    0.30
  -1  -4  -1  157.48    4.10
  -1  -4  -1  147.99    4.20
  -1  -4  -1  147.99    4.30
  -1  -4  -1  154.68    4.20
   1   4   1  151.38    4.20
   1   4   1  151.98    4.20
   1   4   1  149.88    4.20
  -2  -4  -1   63.29    1.90
  -2  -4  -1   59.49    1.80
   2   4   1   62.49    1.80
   2   4   1   64.29    1.90
   2   4   1   61.79    1.90
   2   4   1   63.69    1.80
  -3  -4  -1   18.50    0.80
  -3  -4  -1   20.30    0.90
  -3  -4  -1   21.10    0.80
   3   4   1   19.10    0.80
  -4  -4  -1    0.50    0.30
  -4  -4  -1    1.10    0.30
  -4  -4  -1    0.90    0.30
  -4  -4  -1    1.00    0.30
   4   4   1    0.90    0.30
   4   4   1    0.80    0.30
   4   4   1    1.00    0.30
  -5  -4  -1   -0.30    0.30
  -5  -4  -1   -0.10    0.30
  -5  -4  -1    0.00    0.30
  -5  -4  -1    0.10    0.30
   5   4   1    0.00    0.30
   5   4   1    0.20    0.30
   5   4   1    0.20    0.30
  -6  -4  -1  190.58    5.60
  -6  -4  -1  189.08    5.50
  -6  -4  -1  195.28    5.50
  -6  -4  -1  200.98    5.50
   6   4   1  204.08    5.60
   6   4   1  190.38    5.40
   6   4   1  201.78    5.60
  -7  -4  -1   36.70    1.50
  -7  -4  -1   37.40    1.60
  -7  -4  -1   34.90    1.50
   7   4   1   40.10    1.40
   7   4   1   37.20    1.60
   7   4   1   36.60    1.60
  -8  -4  -1   30.90    1.50
  -8  -4  -1   30.80    1.40
  -8  -4  -1   31.80    1.50
   8   4   1   31.00    1.50
   8   4   1   31.40    1.40
  -9  -4  -1    1.80    0.60
  -9  -4  -1    1.80    0.70
  -9  -4  -1    3.90    0.90
   9   4   1    3.00    0.80
   9   4   1    2.80    0.70
 -10  -4  -1   27.80    1.80
 -10  -4  -1   31.90    1.60
 -10  -4  -1   28.20    1.70
  10   4   1   29.00    1.80
 -11  -4  -1   31.30    1.90
 -11  -4  -1   35.10    1.80
  11   4   1   32.40    2.20
 -12  -4  -1    2.30    1.20
 -12  -4  -1    4.50    1.10
  12   4   1    3.40    1.30
 -13  -4  -1    3.90    1.40
 -13  -4  -1    3.40    1.20
  13   4   1    3.80    1.70
  -9   5   1    8.80    1.70
  -9   5   1   11.20    1.40
   8  -5  -1    0.00    1.10
  -8   5   1    0.60    1.20
  -8   5   1    0.40    0.90
   7  -5  -1   10.50    1.40
  -7   5   1    8.60    1.00
  -7   5   1   10.20    1.30
   6  -5  -1   29.80    1.90
   6  -5  -1   30.60    1.60
  -6   5   1   31.00    1.50
  -6   5   1   25.00    1.70
   5  -5  -1    1.30    0.80
   5  -5  -1    0.90    0.60
   5  -5  -1    0.80    0.70
  -5   5   1    1.20    0.60
  -5   5   1    0.90    0.70
   4  -5  -1  159.28    4.60
   4  -5  -1  158.58    4.90
   4  -5  -1  148.69    4.50
  -4   5   1  154.18    4.60
  -4   5   1  158.08    4.80
   3  -5  -1    0.20    0.60
   3  -5  -1    0.00    0.40
   3  -5  -1    0.00    0.50
  -3   5   1    0.20    0.50
  -3   5   1    0.30    0.40
   2  -5  -1  102.09    2.90
   2  -5  -1   90.29    3.10
   2  -5  -1  101.59    3.10
   2  -5  -1   95.49    2.90
  -2   5   1   93.99    2.90
  -2   5   1   95.49    3.10
   1  -5  -1  354.16    9.30
   1  -5  -1  335.27    9.60
   1  -5  -1  345.17    9.30
  -1   5   1  338.27    9.40
  -1   5   1  343.27    9.40
  -1   5   1  353.06    9.30
   0  -5  -1  268.87    7.10
   0  -5  -1  254.57    7.40
   0  -5  -1  256.07    7.20
   0  -5  -1  274.67    7.30
   0   5   1  255.47    7.20
   0   5   1  279.37    7.20
   0   5   1  261.57    7.30
  -1  -5  -1  203.18    5.60
  -1  -5  -1  207.88    5.90
  -1  -5  -1  209.58    5.60
  -1  -5  -1  211.18    5.70
   1   5   1  200.38    5.70
   1   5   1  203.98    5.70
   1   5   1  209.28    5.60
  -2  -5  -1  178.98    4.80
  -2  -5  -1  169.98    4.80
  -2  -5  -1  170.58    5.00
   2   5   1  174.18    4.70
   2   5   1  170.78    4.80
   2   5   1  176.38    4.80
   2   5   1  171.28    4.80
  -3  -5  -1   76.09    2.50
  -3  -5  -1   83.19    2.40
  -3  -5  -1   81.19    2.40
   3   5   1   77.99    2.40
   3   5   1   82.69    2.40
   3   5   1   77.69    2.40
  -4  -5  -1  274.67    7.60
  -4  -5  -1  279.87    7.60
  -4  -5  -1  278.97    7.70
   4   5   1  283.57    7.60
   4   5   1  275.47    7.50
   4   5   1  273.57    7.60
  -5  -5  -1   29.50    1.30
  -5  -5  -1   33.00    1.20
  -5  -5  -1   29.90    1.20
  -5  -5  -1   32.90    1.20
   5   5   1   32.10    1.30
   5   5   1   31.30    1.20
  -6  -5  -1    1.30    0.40
  -6  -5  -1    1.50    0.50
  -6  -5  -1    1.90    0.50
  -6  -5  -1    1.60    0.40
   6   5   1    1.90    0.50
   6   5   1    1.60    0.40
   6   5   1    1.80    0.50
  -7  -5  -1  104.39    3.20
  -7  -5  -1  100.49    3.30
  -7  -5  -1  105.99    3.30
   7   5   1  104.59    3.10
   7   5   1  101.09    3.30
   7   5   1  104.09    3.30
  -8  -5  -1   38.10    1.80
  -8  -5  -1   38.10    1.60
  -8  -5  -1   40.90    1.70
   8   5   1   40.90    1.80
   8   5   1   40.30    1.60
   8   5   1   43.20    1.80
  -9  -5  -1    9.70    1.10
  -9  -5  -1    9.50    1.20
  -9  -5  -1    9.60    1.00
   9   5   1    9.50    1.20
   9   5   1   10.00    1.00
 -10  -5  -1   10.00    1.20
 -10  -5  -1   10.30    1.70
 -10  -5  -1    9.60    1.10
  10   5   1    9.70    1.20
 -11  -5  -1    1.40    1.00
 -11  -5  -1    0.90    0.90
  11   5   1    0.10    1.00
 -12  -5  -1    0.30    1.20
 -12  -5  -1    0.10    0.90
  12   5   1    0.20    1.10
 -13  -5  -1    0.20    1.30
 -13  -5  -1    0.50    1.20
  13   5   1   -0.70    1.30
  -9   6   1   18.60    2.60
   8  -6  -1   12.10    1.90
  -8   6   1   11.30    1.90
  -8   6   1   14.00    1.60
   7  -6  -1    8.00    1.40
  -7   6   1    6.30    1.40
  -7   6   1    6.90    1.00
   6  -6  -1   23.30    1.50
   6  -6  -1   18.80    1.70
  -6   6   1   20.00    1.40
  -6   6   1   20.00    1.70
   5  -6  -1  116.99    3.60
   5  -6  -1  104.49    3.90
  -5   6   1  108.19    3.80
  -5   6   1  109.79    3.50
   4  -6  -1    7.70    1.10
   4  -6  -1   10.40    1.00
  -4   6   1    8.20    1.00
  -4   6   1    9.80    1.00
   3  -6  -1    9.70    1.10
   3  -6  -1    8.60    0.80
  -3   6   1    9.20    1.10
  -3   6   1   10.50    0.90
   2  -6  -1    2.50    0.50
   2  -6  -1    3.80    0.80
  -2   6   1    3.70    0.60
  -2   6   1    3.60    0.70
   1  -6  -1   34.30    1.30
   1  -6  -1   32.60    1.40
   1  -6  -1   34.40    1.60
   1  -6  -1   37.60    1.30
  -1   6   1   32.60    1.40
  -1   6   1   34.00    1.40
   0  -6  -1   35.10    1.20
   0  -6  -1   34.00    1.30
   0  -6  -1   34.60    1.60
   0  -6  -1   34.70    1.40
   0   6   1   31.50    1.40
   0   6   1   37.10    1.30
   0   6   1   31.30    1.30
  -1  -6  -1   13.60    0.60
  -1  -6  -1   12.90    0.70
  -1  -6  -1   12.30    0.80
  -1  -6  -1   11.90    1.00
   1   6   1   11.20    0.80
   1   6   1   13.70    0.60
   1   6   1   11.10    0.70
   1   6   1   13.70    0.80
  -2  -6  -1   72.19    2.30
  -2  -6  -1   72.19    2.50
  -2  -6  -1   76.49    2.30
  -2  -6  -1   73.79    2.40
   2   6   1   77.39    2.30
   2   6   1   71.69    2.30
   2   6   1   74.19    2.10
   2   6   1   71.19    2.30
  -3  -6  -1  200.18    5.70
  -3  -6  -1  206.48    5.80
  -3  -6  -1  211.28    5.70
  -3  -6  -1  203.88    5.90
   3   6   1  206.88    5.70
   3   6   1  207.88    5.60
   3   6   1  194.88    5.70
  -4  -6  -1   96.59    2.90
  -4  -6  -1  100.79    2.90
  -4  -6  -1   95.19    3.10
  -4  -6  -1   95.69    3.00
   4   6   1   91.09    2.90
   4   6   1   97.79    2.90
   4   6   1   99.29    2.90
  -5  -6  -1   67.39    2.40
  -5  -6  -1   72.79    2.20
  -5  -6  -1   71.09    2.30
  -5  -6  -1   69.09    2.30
   5   6   1   72.19    2.30
   5   6   1   71.99    2.30
   5   6   1   68.89    2.20
  -6  -6  -1  207.58    6.10
  -6  -6  -1  209.28    6.30
  -6  -6  -1  217.38    6.10
  -6  -6  -1  222.38    6.10
   6   6   1  215.98    6.10
   6   6   1  221.08    6.10
   6   6   1  220.78    6.20
  -7  -6  -1    0.50    0.50
  -7  -6  -1    0.30    0.60
  -7  -6  -1    0.30    0.50
   7   6   1    0.30    0.50
   7   6   1    0.50    0.60
   7   6   1    0.00    0.60
  -8  -6  -1  208.88    6.10
  -8  -6  -1  203.88    6.00
  -8  -6  -1  203.78    6.00
   8   6   1  201.38    6.10
   8   6   1  212.58    6.10
   8   6   1  204.98    6.00
  -9  -6  -1  109.19    3.70
  -9  -6  -1  120.39    3.90
  -9  -6  -1  118.29    3.70
   9   6   1  115.69    3.90
 -10  -6  -1  112.49    3.90
 -10  -6  -1  117.89    3.80
  10   6   1  111.99    3.90
 -11  -6  -1    0.10    0.80
 -11  -6  -1    0.30    1.00
  11   6   1    0.70    1.00
 -12  -6  -1   15.10    1.80
 -12  -6  -1   18.00    1.60
  12   6   1   17.60    1.90
 -13  -6  -1   -0.20    1.50
 -13  -6  -1    0.90    1.20
  13   6   1    1.00    1.50
   8  -7  -1   14.20    2.10
  -8   7   1   13.70    2.20
  -8   7   1   12.00    1.70
   7  -7  -1    5.60    1.50
  -7   7   1    4.60    1.10
  -7   7   1    4.20    1.40
   6  -7  -1  105.89    4.20
  -6   7   1  107.99    3.70
  -6   7   1  110.89    4.10
   5  -7  -1   19.70    1.40
   5  -7  -1   16.30    1.80
  -5   7   1   18.80    1.30
  -5   7   1   20.80    1.60
   4  -7  -1    9.00    1.30
   4  -7  -1   12.80    1.20
  -4   7   1    9.80    1.10
  -4   7   1    9.30    1.20
   3  -7  -1   48.80    1.80
   3  -7  -1   48.10    2.30
  -3   7   1   42.70    1.80
  -3   7   1   43.70    2.00
   2  -7  -1   13.50    1.20
   2  -7  -1   15.40    1.00
  -2   7   1   14.90    1.10
  -2   7   1   13.20    1.00
   1  -7  -1  107.89    3.70
   1  -7  -1  108.29    3.30
  -1   7   1  110.89    3.40
  -1   7   1  110.19    3.50
   0  -7  -1  147.49    4.60
   0  -7  -1  149.49    4.20
   0   7   1  145.09    4.40
   0   7   1  143.19    4.30
  -1  -7  -1   21.10    1.30
  -1  -7  -1   20.10    1.10
  -1  -7  -1   20.40    1.00
   1   7   1   21.40    1.10
   1   7   1   20.50    1.10
  -2  -7  -1  152.88    4.80
  -2  -7  -1  154.38    4.40
  -2  -7  -1  156.98    4.50
  -2  -7  -1  164.78    4.60
   2   7   1  147.29    4.50
   2   7   1  155.48    4.50
  -3  -7  -1  212.18    5.90
  -3  -7  -1  202.98    6.20
  -3  -7  -1  219.48    5.90
  -3  -7  -1  212.28    6.00
   3   7   1  213.18    5.70
   3   7   1  210.28    6.00
   3   7   1  210.88    5.90
   3   7   1  202.08    5.90
  -4  -7  -1  105.99    3.40
  -4  -7  -1  102.29    3.50
  -4  -7  -1  111.99    3.30
  -4  -7  -1  114.29    3.30
   4   7   1  115.69    3.30
   4   7   1  107.79    3.20
   4   7   1  112.59    3.40
  -5  -7  -1    0.20    0.50
  -5  -7  -1    0.40    0.40
  -5  -7  -1    0.30    0.50
  -5  -7  -1    0.60    0.50
   5   7   1    0.20    0.50
   5   7   1    0.20    0.40
   5   7   1    0.80    0.50
  -6  -7  -1   25.10    1.20
  -6  -7  -1   24.70    1.20
  -6  -7  -1   20.50    1.20
  -6  -7  -1   22.50    1.30
   6   7   1   23.60    1.20
   6   7   1   23.40    1.30
  -7  -7  -1   84.79    2.90
  -7  -7  -1   85.59    3.00
  -7  -7  -1   86.89    2.90
   7   7   1   87.59    2.90
   7   7   1   83.69    2.90
  -8  -7  -1  549.15   15.10
  -8  -7  -1  560.04   14.90
  -8  -7  -1  550.44   14.90
   8   7   1  520.95   14.90
   8   7   1  553.64   14.90
  -9  -7  -1   18.30    1.50
  -9  -7  -1   18.80    1.40
  -9  -7  -1   21.70    1.40
   9   7   1   20.70    1.50
 -10  -7  -1    0.90    0.80
 -10  -7  -1    1.90    0.90
  10   7   1    2.20    1.00
 -11  -7  -1    0.10    1.10
 -11  -7  -1   -0.30    0.90
  11   7   1    0.20    1.00
 -12  -7  -1   -0.40    1.00
 -12  -7  -1    0.20    1.20
  12   7   1   -0.50    1.20
 -13  -7  -1    4.20    1.60
 -13  -7  -1    2.80    1.30
  13   7   1    3.70    1.60
   7  -8  -1   43.10    3.10
  -7   8   1   43.70    2.60
  -7   8   1   46.70    3.00
   6  -8  -1  116.19    4.60
  -6   8   1  112.89    3.90
  -6   8   1  115.19    4.40
   5  -8  -1   20.60    2.20
  -5   8   1   23.70    1.60
  -5   8   1   23.30    1.90
   4  -8  -1   14.00    1.40
   4  -8  -1   13.30    1.60
  -4   8   1   14.60    1.70
  -4   8   1   11.70    1.20
   3  -8  -1    5.10    1.10
   3  -8  -1    6.60    0.90
  -3   8   1    5.90    1.00
  -3   8   1    5.70    0.90
   2  -8  -1   14.90    1.40
   2  -8  -1   14.20    1.10
  -2   8   1   15.70    1.10
  -2   8   1   15.70    1.40
   1  -8  -1   51.79    2.00
   1  -8  -1   55.99    2.40
  -1   8   1   58.19    2.20
  -1   8   1   57.09    2.10
   0  -8  -1   16.50    1.00
   0  -8  -1   16.40    1.30
   0   8   1   14.40    1.20
   0   8   1   14.70    1.10
  -1  -8  -1   62.99    2.20
  -1  -8  -1   64.69    2.50
   1   8   1   65.49    2.20
   1   8   1   57.69    2.30
  -2  -8  -1    1.20    0.50
  -2  -8  -1    0.80    0.60
  -2  -8  -1    1.00    0.60
   2   8   1    1.00    0.60
   2   8   1    0.90    0.50
  -3  -8  -1   55.19    1.90
  -3  -8  -1   54.09    2.20
  -3  -8  -1   53.09    2.10
  -3  -8  -1   59.39    2.00
   3   8   1   51.39    2.00
   3   8   1   54.09    2.00
  -4  -8  -1   14.30    1.20
  -4  -8  -1   15.40    1.00
  -4  -8  -1   15.40    1.00
   4   8   1   14.20    1.00
  -5  -8  -1    0.60    0.60
  -5  -8  -1    0.30    0.70
  -5  -8  -1    0.10    0.50
  -5  -8  -1    0.10    0.50
   5   8   1   -0.20    0.50
  -6  -8  -1   69.59    2.30
  -6  -8  -1   61.19    2.40
  -6  -8  -1   71.49    2.60
  -6  -8  -1   67.69    2.40
   6   8   1   63.39    2.40
   6   8   1   66.29    2.30
  -7  -8  -1   38.20    1.80
  -7  -8  -1   30.90    1.70
  -7  -8  -1   34.90    1.60
   7   8   1   37.20    1.70
   7   8   1   33.70    1.70
  -8  -8  -1  360.06    9.90
  -8  -8  -1  353.26   10.00
  -8  -8  -1  336.47    9.80
   8   8   1  343.57    9.80
   8   8   1  358.96    9.90
  -9  -8  -1   38.00    2.10
  -9  -8  -1   38.60    1.90
  -9  -8  -1   40.70    1.90
   9   8   1   35.20    1.90
   9   8   1   39.70    2.00
 -10  -8  -1    0.20    1.00
 -10  -8  -1    0.60    0.90
  10   8   1    0.60    1.00
 -11  -8  -1   10.60    1.50
 -11  -8  -1   10.30    1.30
  11   8   1    9.40    1.50
 -12  -8  -1    2.50    1.20
 -12  -8  -1    1.60    1.30
  12   8   1    1.70    1.30
 -13  -8  -1   45.50    2.60
 -13  -8  -1   44.30    2.90
  13   8   1   42.80    3.00
   6  -9  -1   33.90    3.10
  -6   9   1   36.70    3.00
   5  -9  -1    0.20    1.40
  -5   9   1   -0.20    1.40
  -5   9   1    0.10    0.90
   4  -9  -1   -0.40    1.30
  -4   9   1    0.40    0.80
  -4   9   1   -0.10    1.10
   3  -9  -1   41.00    2.40
  -3   9   1   41.70    1.90
  -3   9   1   43.60    2.30
   2  -9  -1    2.00    0.80
   2  -9  -1    2.40    1.20
  -2   9   1    1.50    0.90
  -2   9   1    1.10    0.70
   1  -9  -1  147.59    4.90
   1  -9  -1  137.49    4.30
  -1   9   1  141.69    4.60
  -1   9   1  141.19    4.40
   0  -9  -1   48.90    2.00
   0  -9  -1   47.40    2.30
   0   9   1   49.30    2.00
   0   9   1   49.10    2.20
  -1  -9  -1   54.69    2.50
  -1  -9  -1   56.19    2.10
   1   9   1   57.89    2.30
   1   9   1   54.39    2.10
  -2  -9  -1   35.60    1.70
  -2  -9  -1   32.90    1.50
  -2  -9  -1   36.80    1.90
   2   9   1   36.80    1.60
   2   9   1   32.40    1.70
  -3  -9  -1   58.49    2.10
  -3  -9  -1   57.89    2.40
  -3  -9  -1   59.59    2.20
   3   9   1   55.89    2.10
   3   9   1   56.19    2.20
  -4  -9  -1   32.40    1.70
  -4  -9  -1   28.90    1.40
  -4  -9  -1   29.30    1.50
   4   9   1   31.90    1.50
  -5  -9  -1  108.89    3.40
  -5  -9  -1  107.09    3.50
  -5  -9  -1  108.59    3.80
   5   9   1  110.09    3.50
  -6  -9  -1   67.79    2.50
  -6  -9  -1   65.59    2.80
   6   9   1   67.29    2.50
  -7  -9  -1    0.30    0.70
  -7  -9  -1    0.00    0.80
   7   9   1    0.50    0.80
  -8  -9  -1   54.19    2.40
  -8  -9  -1   42.00    2.10
   8   9   1   49.50    2.20
  -9  -9  -1    8.60    1.40
  -9  -9  -1    7.40    1.20
   9   9   1    8.50    1.20
   9   9   1    6.00    1.10
 -10  -9  -1    2.40    1.00
  10   9   1    1.80    1.10
 -11  -9  -1    6.00    1.40
  11   9   1    3.70    1.30
  12   9   1    0.30    1.40
  13   9   1   20.80    2.60
   4 -10  -1   -0.50    1.40
  -4  10   1    0.40    1.40
  -4  10   1    0.20    1.00
   3 -10  -1   13.20    1.80
  -3  10   1   12.60    1.70
  -3  10   1   13.40    1.40
   2 -10  -1    0.50    1.20
  -2  10   1    0.40    1.00
  -2  10   1    0.60    0.80
   1 -10  -1   11.20    1.10
   1 -10  -1   11.40    1.50
  -1  10   1   11.30    1.30
  -1  10   1   12.80    1.50
   0 -10  -1   78.89    3.30
   0 -10  -1   78.59    2.80
   0  10   1   80.09    3.00
   0  10   1   79.19    2.80
  -1 -10  -1    2.30    1.00
  -1 -10  -1    2.00    0.80
   1  10   1    2.40    0.90
   1  10   1    3.00    0.80
  -2 -10  -1   80.69    2.90
  -2 -10  -1   73.59    2.70
  -2 -10  -1   82.39    3.30
   2  10   1   75.89    2.70
   2  10   1   79.79    2.90
  -3 -10  -1   38.20    1.80
  -3 -10  -1   41.50    1.80
  -3 -10  -1   36.80    2.10
   3  10   1   35.80    1.70
   3  10   1   37.60    1.90
  -4 -10  -1    0.40    0.70
  -4 -10  -1    0.30    0.70
  -4 -10  -1    0.20    0.80
   4  10   1    0.60    0.70
  -5 -10  -1   70.29    3.00
  -5 -10  -1   73.39    2.70
   5  10   1   73.09    2.70
  -6 -10  -1    7.80    1.00
  -6 -10  -1    8.00    1.30
   6  10   1    8.80    1.10
  -7 -10  -1   42.40    2.30
   7  10   1   43.10    2.10
  -8 -10  -1    0.30    0.90
   8  10   1    0.10    0.90
  -9 -10  -1    5.60    1.20
   9  10   1    6.40    1.20
   3 -11  -1    2.40    1.60
  -3  11   1    0.80    1.10
   2 -11  -1    2.30    1.60
  -2  11   1    3.10    1.10
   1 -11  -1    5.20    1.50
  -1  11   1    7.90    1.20
   0 -11  -1    9.40    1.60
   0  11   1   10.50    1.30
  -1 -11  -1    7.50    1.40
   1  11   1    8.70    1.10
  -2 -11  -1    2.70    1.10
   2  11   1    3.00    0.90
  -3 -11  -1   -0.40    0.90
   3  11   1    0.50    0.80
  -4 -11  -1   59.09    2.80
   4  11   1   54.59    2.40
  -5 -11  -1    8.90    1.40
   5  11   1    8.10    1.10
  -6 -11  -1    0.80    1.00
   6  11   1    1.20    0.90
  -7 -11  -1    0.90    1.10
   7  11   1    0.00    0.90
  -8 -11  -1   23.00    2.10
   8  11   1   27.30    1.90
  -9 -11  -1    7.80    1.80
   9  11   1    8.20    1.30
  10  11   1   11.30    1.60
   1 -12  -1    1.20    1.60
  -1  12   1    1.60    1.10
   0 -12  -1   13.40    2.00
   0  12   1   15.60    1.60
  -1 -12  -1   36.10    2.70
   1  12   1   34.60    2.00
  -2 -12  -1   -0.20    1.20
   2  12   1    0.30    0.90
  -3 -12  -1   29.00    2.20
   3  12   1   27.10    1.80
  -4 -12  -1    2.40    1.40
   4  12   1    3.20    1.00
  -5 -12  -1    9.90    1.60
   5  12   1   11.90    1.30
  -6 -12  -1   15.60    1.90
   6  12   1   17.60    1.60
  -7 -12  -1   39.90    2.60
   7  12   1   35.40    2.20
  -8 -12  -1    3.50    1.50
   8  12   1    4.10    1.20
   9  12   1    0.60    1.20
  10  12   1   41.50    2.60
  -1 -13  -1   28.20    3.00
   1  13   1   26.90    2.10
  -2 -13  -1   26.20    2.60
   2  13   1   25.10    2.10
  -3 -13  -1   10.50    2.00
   3  13   1   12.70    1.50
  -4 -13  -1   46.10    3.00
   4  13   1   46.30    2.50
  -5 -13  -1    5.00    1.70
   5  13   1    3.40    1.20
  -6 -13  -1   19.10    2.60
   6  13   1   19.40    1.90
  -7 -13  -1    4.10    1.60
   7  13   1    3.10    1.30
  -8 -13  -1   16.60    2.10
   8  13   1   19.70    2.10
   9  13   1   11.10    1.70
  10  13   1   13.30    1.90
  -4 -14  -1    0.70    2.10
   4  14   1    1.90    2.00
  -5 -14  -1    0.30    2.00
   5  14   1    0.00    1.30
  -6 -14  -1   29.00    3.00
   6  14   1   28.30    2.30
  -7 -14  -1    9.10    2.30
   7  14   1    8.50    1.70
   7  13  -2    4.40    1.20
   6  13  -2    5.50    1.20
   5  13  -2    1.00    1.00
  -5 -13   2   -0.30    2.20
  -5 -13   2    0.80    1.60
   4  13  -2   10.80    1.20
  -4 -13   2   12.30    2.00
  -4 -13   2   17.60    2.20
   3  13  -2   17.30    2.70
   3  13  -2   13.40    1.50
  -3 -13   2   12.00    2.10
  -3 -13   2   18.20    1.80
  -3 -13   2   15.30    2.10
   2  13  -2   17.20    2.40
  -2 -13   2   15.60    2.20
  -2 -13   2   14.40    1.70
  -2 -13   2   11.90    2.10
  10  12  -2   10.40    1.60
 -10 -12   2    7.70    1.90
   9  12  -2   12.70    1.60
  -9 -12   2   13.70    1.90
   8  12  -2   66.19    2.90
  -8 -12   2   73.09    3.40
   7  12  -2    0.40    0.90
  -7 -12   2    1.70    1.40
   6  12  -2    0.20    0.80
  -6 -12   2    0.00    1.30
   5  12  -2    0.10    0.80
  -5 -12   2   -0.10    0.90
  -5 -12   2   -0.80    1.30
  -5 -12   2   -0.40    1.30
   4  12  -2    6.40    1.00
  -4 -12   2    7.50    1.50
  -4 -12   2    6.90    1.10
  -4 -12   2    8.00    1.60
   3  12  -2   23.80    2.10
   3  12  -2   23.50    1.50
  -3 -12   2   26.50    1.80
  -3 -12   2   24.70    2.10
  -3 -12   2   29.70    2.50
   2  12  -2   -0.20    0.70
   2  12  -2    0.50    1.40
  -2 -12   2    0.10    1.00
  -2 -12   2    0.60    1.40
  -2 -12   2   -0.10    1.40
   1  12  -2    0.10    1.50
   1  12  -2    0.30    0.80
  -1 -12   2    1.40    1.50
  -1 -12   2    0.20    1.70
  -1 -12   2    0.10    1.00
   0  12  -2    1.20    1.70
   0  12  -2    0.70    0.80
   0 -12   2    1.60    1.70
   0 -12   2    1.30    1.60
   0 -12   2    1.40    1.20
  -1  12  -2    1.60    1.70
   1 -12   2    3.50    1.30
  11  11  -2    2.40    1.40
 -11 -11   2    2.60    1.70
  10  11  -2    1.70    1.20
 -10 -11   2    2.30    1.40
   9  11  -2    0.80    1.00
  -9 -11   2    0.30    1.30
   8  11  -2   25.00    1.80
  -8 -11   2   25.20    1.90
   7  11  -2   25.00    1.60
  -7 -11   2   26.00    2.00
   6  11  -2    6.60    1.00
  -6 -11   2    6.00    1.30
  -6 -11   2    5.50    1.00
   5  11  -2    1.70    0.80
  -5 -11   2    2.70    1.20
  -5 -11   2    2.10    1.20
  -5 -11   2    2.00    0.90
   4  11  -2   25.80    1.50
  -4 -11   2   25.50    1.80
  -4 -11   2   27.00    2.00
  -4 -11   2   27.30    1.60
   3  11  -2   40.50    2.40
   3  11  -2   40.40    1.80
  -3 -11   2   43.50    2.40
  -3 -11   2   43.80    2.00
  -3 -11   2   41.60    2.40
   2  11  -2  167.88    5.60
   2  11  -2  161.98    5.00
  -2 -11   2  168.38    5.10
  -2 -11   2  170.38    5.80
  -2 -11   2  165.28    5.50
   1  11  -2   39.00    1.70
   1  11  -2   41.40    2.50
  -1 -11   2   37.90    2.40
  -1 -11   2   42.10    2.70
  -1 -11   2   41.90    2.00
   0  11  -2    5.10    0.80
   0  11  -2    6.10    1.40
   0 -11   2    4.60    1.60
   0 -11   2    4.70    1.00
  -1  11  -2   12.90    1.90
  -1  11  -2   12.30    1.20
   1 -11   2   11.60    1.90
   1 -11   2   13.00    1.40
  -2  11  -2    6.10    1.70
  -2  11  -2    5.90    0.90
   2 -11   2    5.80    2.00
   2 -11   2    5.30    1.20
  12  10  -2   22.00    2.40
 -12 -10   2   22.20    2.60
  11  10  -2    9.30    1.50
 -11 -10   2    8.00    1.60
  10  10  -2   -0.20    1.00
 -10 -10   2    0.30    1.30
   9  10  -2    4.10    1.10
  -9 -10   2    4.60    1.30
   8  10  -2   15.50    1.40
  -8 -10   2   15.50    1.70
   7  10  -2   25.10    1.50
  -7 -10   2   23.90    1.80
  -7 -10   2   24.10    1.60
   6  10  -2   14.70    1.20
  -6 -10   2   15.10    1.30
  -6 -10   2   18.60    1.70
  -6 -10   2   12.90    1.50
   5  10  -2   19.60    1.30
  -5 -10   2   21.30    1.40
  -5 -10   2   22.20    1.80
  -5 -10   2   21.10    1.70
   4  10  -2    6.10    0.80
  -4 -10   2    8.80    1.00
  -4 -10   2    6.30    1.10
  -4 -10   2    7.40    1.30
   3  10  -2    9.20    1.00
   3  10  -2   10.10    1.40
  -3 -10   2    8.30    1.20
  -3 -10   2    7.80    0.90
  -3 -10   2   10.10    1.30
   2  10  -2   43.90    2.20
   2  10  -2   41.80    1.70
  -2 -10   2   49.10    2.50
  -2 -10   2   42.20    1.90
  -2 -10   2   44.00    2.20
   1  10  -2    3.40    0.70
   1  10  -2    3.60    1.20
  -1 -10   2    4.00    0.80
  -1 -10   2    4.40    1.10
  -1 -10   2    4.90    1.30
   0  10  -2    2.00    0.60
   0  10  -2    2.70    1.20
   0 -10   2    1.70    0.70
   0 -10   2    2.40    1.20
  -1  10  -2    2.20    0.70
  -1  10  -2    1.50    1.10
   1 -10   2    1.10    0.80
   1 -10   2    2.50    1.20
  -2  10  -2   40.50    2.60
  -2  10  -2   37.80    1.70
   2 -10   2   37.60    1.90
   2 -10   2   42.40    2.60
  -3  10  -2    1.50    0.70
  -3  10  -2    2.20    1.40
   3 -10   2    0.70    0.90
   3 -10   2    0.90    1.40
  -4  10  -2    0.50    1.50
  -4  10  -2    0.50    0.80
   4 -10   2    0.50    1.10
   4 -10   2    0.60    1.50
  12   9  -2   -0.10    1.40
 -12  -9   2    0.60    1.40
  11   9  -2    4.50    1.30
 -11  -9   2    3.40    1.30
  10   9  -2    0.30    0.90
 -10  -9   2   -0.20    1.00
   9   9  -2    4.30    1.00
  -9  -9   2    4.60    1.20
   8   9  -2   74.29    2.70
  -8  -9   2   75.29    3.00
   7   9  -2    1.10    0.70
  -7  -9   2    1.70    0.90
  -7  -9   2    1.30    0.80
   6   9  -2   59.89    2.20
  -6  -9   2   60.69    2.50
  -6  -9   2   57.89    2.40
  -6  -9   2   60.39    2.30
   5   9  -2  194.48    5.70
  -5  -9   2  193.58    5.70
  -5  -9   2  211.38    6.10
  -5  -9   2  190.88    6.00
   4   9  -2   71.89    2.40
  -4  -9   2   68.29    2.40
  -4  -9   2   69.09    2.70
  -4  -9   2   65.69    2.60
   3   9  -2   27.50    1.30
   3   9  -2   27.90    1.60
  -3  -9   2   28.80    1.40
  -3  -9   2   28.20    1.70
  -3  -9   2   24.60    1.50
   2   9  -2   18.90    1.10
   2   9  -2   21.60    1.50
  -2  -9   2   16.60    1.30
  -2  -9   2   20.20    1.20
  -2  -9   2   18.50    1.60
   1   9  -2   34.70    1.90
   1   9  -2   35.90    1.50
  -1  -9   2   34.70    1.60
  -1  -9   2   37.20    2.10
   0   9  -2  115.39    4.10
   0   9  -2  119.79    3.60
   0  -9   2  118.59    3.70
   0  -9   2  121.89    4.30
  -1   9  -2    0.00    0.50
  -1   9  -2    0.60    1.00
   1  -9   2   -0.10    0.90
   1  -9   2   -0.30    0.60
  -2   9  -2   42.30    2.40
  -2   9  -2   42.00    1.60
   2  -9   2   41.60    2.40
   2  -9   2   38.20    1.80
  -3   9  -2    3.00    1.20
  -3   9  -2    2.60    0.60
   3  -9   2    2.90    1.30
   3  -9   2    3.10    0.80
  -4   9  -2    0.70    1.20
  -4   9  -2    0.50    0.60
   4  -9   2    0.30    0.90
   4  -9   2   -0.10    1.20
  -5   9  -2   15.30    2.00
  -5   9  -2   13.70    1.20
   5  -9   2   17.40    1.80
   5  -9   2   11.30    1.90
 -13  -8   2   -0.20    1.50
  12   8  -2   18.70    2.10
  12   8  -2   20.40    2.40
 -12  -8   2   22.00    2.10
  11   8  -2   10.50    1.50
  11   8  -2    8.50    1.50
 -11  -8   2    8.00    1.50
  10   8  -2   -0.20    1.00
  10   8  -2    0.00    0.90
 -10  -8   2   -0.40    0.90
   9   8  -2    2.20    1.10
   9   8  -2    1.50    0.90
  -9  -8   2    1.70    0.90
   8   8  -2    0.30    0.70
  -8  -8   2    0.50    0.80
  -8  -8   2    0.50    0.70
   7   8  -2   14.80    1.20
  -7  -8   2   13.10    1.30
  -7  -8   2   13.60    1.10
   6   8  -2    4.70    0.70
  -6  -8   2    3.30    0.70
  -6  -8   2    4.30    0.90
  -6  -8   2    4.00    0.90
   5   8  -2   10.40    0.90
  -5  -8   2   11.40    0.90
  -5  -8   2    9.10    1.10
  -5  -8   2   11.70    1.00
   4   8  -2    2.70    0.60
  -4  -8   2    2.70    0.80
  -4  -8   2    3.50    0.60
  -4  -8   2    2.10    0.80
   3   8  -2   76.89    2.70
   3   8  -2   73.19    2.40
  -3  -8   2   74.69    2.70
  -3  -8   2   73.09    2.50
  -3  -8   2   77.99    2.80
   2   8  -2  129.89    4.00
   2   8  -2  135.79    4.30
  -2  -8   2  134.89    4.00
  -2  -8   2  138.69    4.40
  -2  -8   2  141.19    4.30
   1   8  -2    2.60    0.80
   1   8  -2    1.50    0.50
  -1  -8   2    1.50    0.80
  -1  -8   2    2.20    0.50
   0   8  -2    0.20    0.40
   0   8  -2    0.50    0.70
   0  -8   2   -0.30    0.70
   0  -8   2    0.10    0.50
  -1   8  -2   50.09    1.80
  -1   8  -2   51.99    2.30
   1  -8   2   50.69    1.90
   1  -8   2   48.10    2.40
  -2   8  -2    8.00    1.10
  -2   8  -2    8.40    0.80
   2  -8   2    8.60    0.90
   2  -8   2    9.30    1.40
  -3   8  -2   24.40    1.80
  -3   8  -2   25.10    1.20
   3  -8   2   26.80    1.40
   3  -8   2   26.40    1.90
  -4   8  -2    2.30    1.20
  -4   8  -2    2.00    0.60
   4  -8   2    2.90    1.20
   4  -8   2    2.40    0.80
  -5   8  -2   19.90    1.20
  -5   8  -2   22.00    2.10
   5  -8   2   26.80    1.60
   5  -8   2   22.10    2.10
  -6   8  -2   32.00    1.60
  -6   8  -2   38.10    2.80
   6  -8   2   36.80    2.10
   6  -8   2   38.00    3.00
  13   7  -2    2.30    1.90
 -13  -7   2    3.40    1.60
  12   7  -2    0.30    1.30
  12   7  -2    1.60    1.50
 -12  -7   2   -0.10    1.30
  11   7  -2   73.39    3.20
  11   7  -2   67.19    2.90
 -11  -7   2   69.49    3.10
  10   7  -2    4.30    1.10
  10   7  -2    5.70    1.10
 -10  -7   2    4.30    1.10
   9   7  -2   19.40    1.50
   9   7  -2   20.90    1.50
  -9  -7   2   20.20    1.60
   8   7  -2   -0.10    0.70
   8   7  -2   -0.30    0.80
  -8  -7   2    0.00    0.80
  -8  -7   2   -0.20    0.60
   7   7  -2   12.80    1.00
   7   7  -2   12.50    1.10
  -7  -7   2   11.20    1.10
  -7  -7   2   11.30    1.00
   6   7  -2  111.29    3.40
   6   7  -2  110.59    3.50
  -6  -7   2  107.79    3.40
  -6  -7   2  111.69    3.60
  -6  -7   2  114.39    3.60
   5   7  -2    5.80    0.70
  -5  -7   2    3.70    0.70
  -5  -7   2    5.20    0.80
  -5  -7   2    4.70    0.60
   4   7  -2   65.39    2.10
  -4  -7   2   64.29    2.10
  -4  -7   2   58.69    2.30
  -4  -7   2   62.49    2.30
   3   7  -2  261.07    7.50
   3   7  -2  254.67    7.20
  -3  -7   2  265.17    7.50
  -3  -7   2  268.77    7.20
  -3  -7   2  255.27    7.50
   2   7  -2  189.48    5.10
   2   7  -2  180.38    5.40
  -2  -7   2  175.38    5.50
  -2  -7   2  182.78    5.10
  -2  -7   2  182.98    5.40
   1   7  -2    0.50    0.40
   1   7  -2    0.80    0.60
  -1  -7   2    0.60    0.70
  -1  -7   2    0.60    0.40
   0   7  -2    2.00    0.40
   0   7  -2    1.70    0.60
   0  -7   2    1.50    0.40
   0  -7   2    1.60    0.70
  -1   7  -2    2.50    0.70
  -1   7  -2    2.60    0.40
   1  -7   2    3.10    0.50
   1  -7   2    2.10    0.80
  -2   7  -2   69.09    2.70
  -2   7  -2   69.59    2.20
   2  -7   2   71.89    2.90
   2  -7   2   72.99    2.40
  -3   7  -2    9.30    1.20
  -3   7  -2    6.50    0.70
   3  -7   2    8.80    1.20
   3  -7   2    8.20    0.90
  -4   7  -2    5.80    0.70
  -4   7  -2    5.50    1.10
   4  -7   2    5.40    1.20
   4  -7   2    6.70    0.80
  -5   7  -2    3.70    1.10
  -5   7  -2    5.00    0.70
   5  -7   2    4.00    1.20
   5  -7   2    4.90    0.90
  -6   7  -2   16.00    1.20
  -6   7  -2   15.40    1.80
   6  -7   2   18.50    2.00
   6  -7   2   19.10    1.50
  -7   7  -2    0.10    0.70
  -7   7  -2    1.20    1.60
   7  -7   2    0.70    1.00
   7  -7   2    1.30    1.50
  13   6  -2    2.20    1.80
 -13  -6   2    3.00    1.60
  12   6  -2    3.80    1.50
 -12  -6   2    4.20    1.40
  11   6  -2   25.60    2.10
  11   6  -2   28.30    2.00
 -11  -6   2   26.30    1.90
  10   6  -2    3.70    1.10
  10   6  -2    3.90    1.10
 -10  -6   2    2.40    0.90
   9   6  -2    3.50    1.00
   9   6  -2    2.60    0.80
  -9  -6   2    1.90    0.80
   8   6  -2    1.20    0.70
   8   6  -2    2.20    0.70
  -8  -6   2    2.20    0.70
  -8  -6   2    2.60    0.80
   7   6  -2    0.30    0.50
   7   6  -2    0.40    0.70
  -7  -6   2    0.60    0.60
  -7  -6   2    0.80    0.60
   6   6  -2   30.90    1.40
   6   6  -2   31.70    1.40
  -6  -6   2   34.00    1.40
  -6  -6   2   34.90    1.50
  -6  -6   2   30.90    1.50
   5   6  -2   13.90    0.90
   5   6  -2   11.10    0.80
  -5  -6   2   12.10    0.90
  -5  -6   2   12.70    0.90
  -5  -6   2   13.10    0.80
   4   6  -2   26.70    1.20
   4   6  -2   29.10    1.10
  -4  -6   2   30.00    1.20
  -4  -6   2   30.50    1.30
  -4  -6   2   29.10    1.30
   3   6  -2    0.30    0.50
   3   6  -2    0.10    0.30
   3   6  -2    0.20    0.30
  -3  -6   2    0.30    0.40
  -3  -6   2    0.00    0.50
  -3  -6   2    0.00    0.30
   2   6  -2   71.69    2.30
   2   6  -2   78.39    2.60
  -2  -6   2   78.79    2.30
  -2  -6   2   74.09    2.50
  -2  -6   2   75.59    2.60
   1   6  -2    0.00    0.50
   1   6  -2    0.00    0.30
  -1  -6   2    0.10    0.30
  -1  -6   2   -0.10    0.50
   0   6  -2    1.60    0.60
   0   6  -2    2.30    0.40
   0  -6   2    1.50    0.60
   0  -6   2    2.20    0.40
  -1   6  -2   92.19    2.80
  -1   6  -2   96.19    3.10
   1  -6   2   97.29    2.80
   1  -6   2   92.09    3.20
  -2   6  -2    0.30    0.60
  -2   6  -2    0.10    0.30
   2  -6   2   -0.20    0.40
   2  -6   2    0.30    0.60
  -3   6  -2  102.59    3.50
  -3   6  -2  102.39    3.10
   3  -6   2  103.59    3.20
   3  -6   2  106.89    3.70
  -4   6  -2   31.50    1.30
  -4   6  -2   28.90    1.70
   4  -6   2   29.20    1.80
   4  -6   2   31.80    1.40
  -5   6  -2    1.70    0.50
  -5   6  -2    1.90    0.90
   5  -6   2    1.90    0.90
   5  -6   2    1.10    0.60
  -6   6  -2    6.60    1.20
  -6   6  -2    5.00    0.70
   6  -6   2    4.60    1.20
   6  -6   2    4.00    0.80
  -7   6  -2    0.00    1.20
  -7   6  -2   -0.10    0.60
   7  -6   2    0.30    1.20
   7  -6   2    0.20    0.80
  -8   6  -2   26.40    2.40
  -8   6  -2   23.40    1.40
   8  -6   2   28.40    2.00
   8  -6   2   24.50    2.40
  13   5  -2    8.10    2.00
 -13  -5   2   10.30    1.90
  12   5  -2   10.70    1.90
 -12  -5   2    9.00    1.50
  11   5  -2   28.90    2.00
  11   5  -2   28.00    2.00
 -11  -5   2   27.90    2.10
  10   5  -2    9.10    1.20
  10   5  -2    6.40    1.20
 -10  -5   2    6.70    1.10
   9   5  -2   15.60    1.30
   9   5  -2   12.90    1.30
  -9  -5   2   16.00    1.30
   8   5  -2  150.78    4.70
   8   5  -2  151.08    4.60
  -8  -5   2  145.49    4.70
  -8  -5   2  157.18    4.50
   7   5  -2   22.30    1.20
   7   5  -2   20.70    1.20
  -7  -5   2   20.70    1.10
  -7  -5   2   21.70    1.20
   6   5  -2   58.59    2.10
   6   5  -2   57.09    2.00
  -6  -5   2   58.89    2.00
  -6  -5   2   59.19    2.10
  -6  -5   2   57.69    2.00
  -6  -5   2   59.09    2.10
   5   5  -2    9.00    0.70
   5   5  -2    8.30    0.70
  -5  -5   2    8.10    0.70
  -5  -5   2    8.70    0.70
  -5  -5   2    8.50    0.80
  -5  -5   2    8.90    0.80
   4   5  -2   15.80    0.80
   4   5  -2   16.50    0.80
  -4  -5   2   15.20    0.90
  -4  -5   2   16.40    0.90
  -4  -5   2   15.40    0.90
  -4  -5   2   16.50    0.80
   3   5  -2    3.00    0.40
   3   5  -2    2.40    0.40
  -3  -5   2    2.50    0.50
  -3  -5   2    3.20    0.50
  -3  -5   2    2.60    0.50
  -3  -5   2    3.50    0.40
   2   5  -2   49.80    1.70
   2   5  -2   56.09    1.70
   2   5  -2   56.59    1.50
   2   5  -2   50.39    1.90
  -2  -5   2   49.30    1.80
  -2  -5   2   54.19    1.90
  -2  -5   2   54.99    1.70
   1   5  -2    1.90    0.30
   1   5  -2    1.30    0.40
   1   5  -2    3.20    0.40
  -1  -5   2    1.70    0.50
  -1  -5   2    2.00    0.30
   0   5  -2    0.90    0.30
   0   5  -2    0.80    0.50
   0   5  -2    1.20    0.40
   0  -5   2    0.90    0.50
   0  -5   2    1.20    0.30
  -1   5  -2  286.77    7.90
  -1   5  -2  290.37    8.30
  -1   5  -2  311.77    8.00
   1  -5   2  294.47    8.00
   1  -5   2  293.57    8.40
  -2   5  -2   60.79    1.80
  -2   5  -2   59.79    2.20
   2  -5   2   58.69    1.90
   2  -5   2   55.79    2.20
  -3   5  -2   58.09    2.20
  -3   5  -2   55.39    1.80
   3  -5   2   57.49    1.90
   3  -5   2   57.19    2.30
  -4   5  -2   40.00    1.90
  -4   5  -2   40.80    1.40
   4  -5   2   38.10    1.50
   4  -5   2   37.50    1.90
  -5   5  -2   62.79    2.10
  -5   5  -2   67.39    2.70
   5  -5   2   64.49    2.70
   5  -5   2   65.69    2.20
  -6   5  -2    6.80    1.10
  -6   5  -2    7.40    0.80
   6  -5   2    7.00    1.30
   6  -5   2    8.60    0.90
  -7   5  -2   35.50    2.20
  -7   5  -2   31.10    1.50
   7  -5   2   34.80    2.30
   7  -5   2   30.10    1.70
  -8   5  -2    9.80    1.10
  -8   5  -2    9.70    1.50
   8  -5   2    9.40    1.20
   8  -5   2   10.70    1.80
  -9   5  -2    3.20    1.60
  -9   5  -2    3.30    0.90
   9  -5   2    4.70    1.20
   9  -5   2    3.60    1.60
  13   4  -2   13.00    2.10
 -13  -4   2   13.00    1.90
  12   4  -2   29.40    2.30
 -12  -4   2   25.10    2.10
  11   4  -2    3.00    1.20
 -11  -4   2    1.90    1.10
  10   4  -2   13.60    1.50
  10   4  -2   10.80    1.40
 -10  -4   2   11.50    1.30
   9   4  -2    9.70    1.20
   9   4  -2   10.20    1.10
  -9  -4   2    8.50    1.20
  -9  -4   2    8.80    1.10
   8   4  -2   32.40    1.60
   8   4  -2   35.70    1.80
  -8  -4   2   36.40    1.70
  -8  -4   2   37.80    1.60
  -8  -4   2   35.50    1.70
   7   4  -2    0.10    0.50
   7   4  -2    0.30    0.50
  -7  -4   2    0.30    0.50
  -7  -4   2    0.20    0.50
  -7  -4   2    0.50    0.40
   6   4  -2    8.40    0.90
   6   4  -2    7.70    0.80
  -6  -4   2    9.20    0.80
  -6  -4   2   10.40    0.70
  -6  -4   2   10.00    0.90
  -6  -4   2    9.30    0.70
   5   4  -2   90.39    2.60
   5   4  -2   82.19    2.60
   5   4  -2   86.29    2.70
  -5  -4   2   84.39    2.60
  -5  -4   2   83.19    2.70
  -5  -4   2   82.59    2.60
  -5  -4   2   85.59    2.50
   4   4  -2  180.78    5.10
   4   4  -2  183.38    5.10
  -4  -4   2  185.38    5.20
  -4  -4   2  179.78    5.00
  -4  -4   2  184.78    5.10
  -4  -4   2  184.68    5.10
   3   4  -2  173.78    4.80
   3   4  -2  177.98    4.80
  -3  -4   2  169.58    4.80
  -3  -4   2  177.48    4.90
  -3  -4   2  173.28    4.90
  -3  -4   2  173.18    4.80
   2   4  -2   42.90    1.30
   2   4  -2   39.90    1.30
   2   4  -2   40.70    1.50
  -2  -4   2   39.60    1.30
  -2  -4   2   40.00    1.40
  -2  -4   2   42.10    1.50
   1   4  -2    0.70    0.30
   1   4  -2    1.10    0.30
   1   4  -2    1.30    0.20
  -1  -4   2    1.00    0.20
  -1  -4   2    0.90    0.40
   0   4  -2    8.00    0.70
   0   4  -2   10.90    0.50
   0   4  -2   10.20    0.50
   0  -4   2    8.10    0.70
   0  -4   2    8.30    0.50
  -1   4  -2  130.89    3.40
  -1   4  -2  119.39    3.40
  -1   4  -2  118.29    3.60
   1  -4   2  114.99    3.70
   1  -4   2  124.29    3.30
   1  -4   2  120.09    3.40
  -2   4  -2  123.49    4.00
  -2   4  -2  132.29    3.70
  -2   4  -2  138.19    3.70
   2  -4   2  133.49    3.70
   2  -4   2  135.39    3.70
   2  -4   2  128.89    4.10
  -3   4  -2    0.80    0.50
  -3   4  -2    1.80    0.30
   3  -4   2    1.80    0.40
   3  -4   2    1.50    0.60
   3  -4   2    1.60    0.40
  -4   4  -2   96.89    3.20
  -4   4  -2   99.49    2.90
   4  -4   2   94.89    2.90
   4  -4   2   97.39    3.30
   4  -4   2   97.39    3.00
  -5   4  -2   31.80    1.20
  -5   4  -2   30.80    1.60
   5  -4   2   29.10    1.30
   5  -4   2   29.70    1.50
   5  -4   2   30.60    1.70
  -6   4  -2  272.97    8.20
  -6   4  -2  282.17    7.70
   6  -4   2  280.37    7.80
   6  -4   2  282.77    8.30
  -7   4  -2  218.78    6.50
  -7   4  -2  203.48    5.90
   7  -4   2  202.68    6.00
   7  -4   2  200.88    6.60
  -8   4  -2    3.50    1.20
  -8   4  -2    4.50    0.70
   8  -4   2    4.80    0.90
   8  -4   2    3.40    1.20
  -9   4  -2   10.40    1.70
  -9   4  -2    6.90    0.90
   9  -4   2    8.60    1.20
   9  -4   2    6.90    1.70
 -10   4  -2   -0.20    0.80
 -10   4  -2    0.60    1.50
  10  -4   2    0.90    1.80
  10  -4   2    0.00    1.10
 -13  -3   2    0.40    1.70
  12   3  -2   82.09    3.70
 -12  -3   2   77.99    3.50
  11   3  -2    0.40    1.10
 -11  -3   2    0.40    1.00
 -11  -3   2    0.00    1.00
  10   3  -2    5.90    1.20
 -10  -3   2    9.10    1.20
 -10  -3   2    7.00    1.10
   9   3  -2   79.59    2.80
   9   3  -2   72.39    2.90
  -9  -3   2   76.59    2.80
  -9  -3   2   70.79    2.80
   8   3  -2   52.69    2.10
   8   3  -2   55.59    2.20
  -8  -3   2   50.49    2.00
  -8  -3   2   54.89    2.20
   7   3  -2   84.29    2.90
   7   3  -2   86.79    2.80
  -7  -3   2   86.99    2.70
  -7  -3   2   83.79    2.80
  -7  -3   2   89.69    2.90
   6   3  -2    0.00    0.40
   6   3  -2    0.00    0.40
   6   3  -2    0.30    0.50
  -6  -3   2    0.30    0.40
  -6  -3   2   -0.20    0.40
  -6  -3   2    0.00    0.40
  -6  -3   2    0.10    0.40
   5   3  -2  216.68    6.20
   5   3  -2  216.48    6.10
   5   3  -2  224.08    6.00
  -5  -3   2  221.88    6.00
  -5  -3   2  215.68    6.10
  -5  -3   2  227.28    6.20
  -5  -3   2  215.68    6.00
   4   3  -2  222.58    6.20
   4   3  -2  213.38    6.20
   4   3  -2  226.08    6.30
  -4  -3   2  238.48    6.20
  -4  -3   2  230.18    6.30
  -4  -3   2  226.18    6.20
  -4  -3   2  235.28    6.40
   3   3  -2  317.97    8.60
   3   3  -2  316.97    8.60
  -3  -3   2  324.67    8.60
  -3  -3   2  333.27    8.60
  -3  -3   2  306.37    8.70
   2   3  -2  347.27    9.20
   2   3  -2  352.46    9.20
  -2  -3   2  334.37    9.10
  -2  -3   2  346.27    9.20
  -2  -3   2  344.07    9.30
   1   3  -2  164.28    4.40
   1   3  -2  172.98    4.40
   1   3  -2  160.88    4.60
  -1  -3   2  161.18    4.60
  -1  -3   2  165.78    4.60
  -1  -3   2  160.98    4.40
   0   3  -2  382.96   10.00
   0   3  -2  400.76   10.00
   0   3  -2  372.96   10.30
   0  -3   2  373.16   10.30
   0  -3   2  370.56   10.00
   0  -3   2  380.86   10.00
   0  -3   2  377.56   10.00
  -1   3  -2    7.80    0.60
  -1   3  -2    8.00    0.40
  -1   3  -2    9.50    0.40
   1  -3   2    8.30    0.40
   1  -3   2    9.30    0.60
   1  -3   2    8.40    0.40
   1  -3   2    8.20    0.40
  -2   3  -2   10.70    0.50
  -2   3  -2    9.30    0.70
  -2   3  -2   11.20    0.50
   2  -3   2   10.10    0.50
   2  -3   2    9.50    0.70
   2  -3   2   10.00    0.50
  -3   3  -2   40.30    1.30
  -3   3  -2   45.70    1.40
  -3   3  -2   39.20    1.60
   3  -3   2   40.00    1.30
   3  -3   2   41.90    1.70
   3  -3   2   40.20    1.40
  -4   3  -2  127.29    3.60
  -4   3  -2  126.69    4.00
   4  -3   2  122.39    4.00
   4  -3   2  133.49    3.60
   4  -3   2  125.79    3.70
  -5   3  -2   12.00    1.00
  -5   3  -2   11.30    0.70
   5  -3   2   12.60    0.80
   5  -3   2   12.50    1.10
   5  -3   2   10.50    0.90
  -6   3  -2  155.28    4.40
  -6   3  -2  151.78    4.80
   6  -3   2  152.48    4.50
   6  -3   2  155.38    4.90
   6  -3   2  149.49    4.60
  -7   3  -2  189.58    6.00
  -7   3  -2  194.28    5.60
   7  -3   2  196.98    6.10
   7  -3   2  194.08    5.60
   7  -3   2  202.28    5.90
  -8   3  -2    3.40    1.00
  -8   3  -2    3.70    0.70
   8  -3   2    2.20    0.70
   8  -3   2    2.80    1.00
   8  -3   2    2.90    1.10
  -9   3  -2    0.20    1.00
  -9   3  -2    0.80    0.70
   9  -3   2    0.80    1.20
   9  -3   2    0.20    0.80
 -10   3  -2    5.50    0.90
 -10   3  -2    3.60    1.40
  10  -3   2    4.80    1.70
  10  -3   2    5.30    1.20
  11  -3   2    5.80    2.10
  12   2  -2   13.60    1.90
 -12  -2   2   12.60    1.80
 -12  -2   2   13.20    1.60
  11   2  -2    0.30    1.10
 -11  -2   2   -0.10    1.00
 -11  -2   2   -0.10    1.00
  10   2  -2    3.60    1.20
 -10  -2   2    5.40    1.10
 -10  -2   2    2.70    0.90
   9   2  -2    4.70    1.00
   9   2  -2    4.80    1.10
  -9  -2   2    5.30    1.00
  -9  -2   2    4.10    0.90
   8   2  -2   90.89    3.30
   8   2  -2   96.79    3.20
  -8  -2   2   94.79    3.30
  -8  -2   2   91.19    3.10
   7   2  -2  214.08    6.30
   7   2  -2  221.48    6.20
   7   2  -2  223.98    6.50
  -7  -2   2  225.28    6.20
  -7  -2   2  216.68    6.30
  -7  -2   2  221.78    6.40
   6   2  -2  129.99    3.90
   6   2  -2  138.79    3.80
   6   2  -2  131.19    4.00
  -6  -2   2  123.69    3.80
  -6  -2   2  132.89    3.70
  -6  -2   2  126.89    3.90
  -6  -2   2  125.99    3.70
   5   2  -2  112.39    3.40
   5   2  -2  114.59    3.30
   5   2  -2  118.49    3.50
  -5  -2   2  112.29    3.30
  -5  -2   2  116.29    3.30
  -5  -2   2  116.69    3.40
  -5  -2   2  111.49    3.40
   4   2  -2   15.50    0.70
   4   2  -2   17.20    0.80
  -4  -2   2   16.00    0.70
  -4  -2   2   14.00    0.70
  -4  -2   2   16.30    0.70
  -4  -2   2   15.70    0.80
   3   2  -2  497.85   13.60
   3   2  -2  507.65   13.70
  -3  -2   2  518.95   13.60
  -3  -2   2  524.05   13.50
  -3  -2   2  521.15   13.60
   2   2  -2 1181.38   30.70
   2   2  -2 1126.19   30.60
  -2  -2   2 1227.98   30.70
  -2  -2   2 1122.79   30.60
  -2  -2   2 1180.78   30.70
   1   2  -2  330.67    8.60
   1   2  -2  316.27    8.50
   1   2  -2  325.67    8.50
   1   2  -2  332.17    8.70
  -1  -2   2  328.27    8.60
  -1  -2   2  322.07    8.70
  -1  -2   2  312.87    8.50
   0   2  -2  435.46   11.00
   0   2  -2  424.76   11.00
   0   2  -2  420.56   11.20
   0   2  -2  429.86   11.10
   0  -2   2  417.16   11.00
   0  -2   2  406.16   11.20
   0  -2   2  407.06   11.00
  -1   2  -2   12.00    0.60
  -1   2  -2   12.80    0.40
  -1   2  -2   12.30    0.40
  -1   2  -2   11.20    0.60
   1  -2   2   12.00    0.40
   1  -2   2   10.30    0.60
   1  -2   2   12.40    0.40
   1  -2   2   11.30    0.50
  -2   2  -2  263.77    7.50
  -2   2  -2  292.47    7.30
  -2   2  -2  265.47    7.60
  -2   2  -2  276.27    7.30
   2  -2   2  276.37    7.30
   2  -2   2  286.37    7.40
   2  -2   2  263.57    7.50
   2  -2   2  264.87    7.30
  -3   2  -2   29.40    1.30
  -3   2  -2   32.60    1.00
  -3   2  -2   35.90    1.10
  -3   2  -2   31.10    1.30
   3  -2   2   32.70    1.10
   3  -2   2   30.20    1.10
   3  -2   2   33.50    1.30
  -4   2  -2    5.10    0.60
  -4   2  -2    4.10    0.70
  -4   2  -2    5.10    0.40
  -4   2  -2    6.30    0.50
   4  -2   2    5.80    0.50
   4  -2   2    3.90    0.50
   4  -2   2    6.20    0.70
  -5   2  -2   16.40    0.80
  -5   2  -2   12.80    1.10
  -5   2  -2   18.00    1.00
   5  -2   2   16.50    1.10
   5  -2   2   15.30    0.80
   5  -2   2   16.20    1.00
  -6   2  -2    0.50    0.60
  -6   2  -2    0.70    0.70
  -6   2  -2    0.20    0.30
   6  -2   2    0.10    0.50
   6  -2   2    1.00    0.40
   6  -2   2    0.90    0.70
  -7   2  -2    1.20    0.80
  -7   2  -2    1.10    0.50
  -7   2  -2    0.90    0.70
   7  -2   2    0.60    0.70
   7  -2   2    0.30    0.50
   7  -2   2    1.00    0.70
  -8   2  -2    1.70    1.00
  -8   2  -2    2.40    0.90
  -8   2  -2    1.60    0.60
   8  -2   2    2.10    0.90
   8  -2   2    1.40    1.00
   8  -2   2    1.70    0.60
  -9   2  -2   -0.10    1.00
  -9   2  -2    0.00    0.60
   9  -2   2   -0.20    1.10
   9  -2   2    0.00    0.90
   9  -2   2   -0.30    0.70
 -10   2  -2   43.70    2.60
 -10   2  -2   44.80    2.00
  10  -2   2   42.10    2.20
  10  -2   2   48.50    2.80
  10  -2   2   44.20    2.60
 -11   2  -2    0.20    1.40
 -11   2  -2    0.80    0.90
  11  -2   2    0.20    1.70
  11  -2   2    0.40    1.20
  11  -2   2    1.00    1.70
  12   1  -2    5.30    1.90
 -12  -1   2    5.60    1.70
 -12  -1   2    6.10    1.40
  11   1  -2   16.40    1.90
 -11  -1   2   18.40    1.70
 -11  -1   2   19.00    1.90
  10   1  -2   31.50    2.00
 -10  -1   2   33.40    1.80
 -10  -1   2   32.30    1.90
   9   1  -2    0.70    0.90
  -9  -1   2    1.80    0.80
  -9  -1   2    0.90    0.80
   8   1  -2    0.20    0.70
   8   1  -2   -0.20    0.70
  -8  -1   2   -0.10    0.60
  -8  -1   2    0.00    0.60
   7   1  -2   15.90    1.00
   7   1  -2   14.40    0.90
   7   1  -2   15.00    1.20
   7   1  -2   14.30    1.10
  -7  -1   2   14.90    1.00
  -7  -1   2   14.30    1.00
  -7  -1   2   14.70    1.00
  -7  -1   2   14.10    1.00
   6   1  -2  281.27    7.60
   6   1  -2  262.87    7.70
   6   1  -2  277.37    7.60
   6   1  -2  279.37    7.90
  -6  -1   2  283.97    7.60
  -6  -1   2  280.07    7.60
  -6  -1   2  279.57    7.70
  -6  -1   2  270.27    7.80
   5   1  -2   46.90    1.40
   5   1  -2   44.60    1.60
   5   1  -2   43.80    1.50
   5   1  -2   44.10    1.70
  -5  -1   2   42.50    1.50
  -5  -1   2   42.10    1.60
  -5  -1   2   43.40    1.50
  -5  -1   2   44.30    1.60
   4   1  -2   15.00    0.70
   4   1  -2   17.70    0.70
   4   1  -2   17.60    0.90
  -4  -1   2   17.30    0.70
  -4  -1   2   16.70    0.70
  -4  -1   2   16.90    0.80
  -4  -1   2   17.40    0.80
   3   1  -2   14.40    0.70
   3   1  -2   12.70    0.60
   3   1  -2   12.70    0.60
  -3  -1   2   12.00    0.60
  -3  -1   2   13.20    0.50
  -3  -1   2   13.30    0.60
  -3  -1   2   12.70    0.50
   2   1  -2  282.87    7.70
   2   1  -2  295.17    7.60
  -2  -1   2  285.57    7.60
  -2  -1   2  283.57    7.70
   1   1  -2 1336.67   34.20
   1   1  -2 1317.57   34.20
   1   1  -2 1304.27   34.20
  -1  -1   2 1276.47   34.20
  -1  -1   2 1298.57   34.20
  -1  -1   2 1289.47   34.20
   0   1  -2   73.59    2.10
   0   1  -2   73.29    2.00
   0   1  -2   70.39    2.10
   0  -1   2   71.09    2.00
  -1   1  -2  107.79    3.00
  -1   1  -2  106.09    2.90
  -1   1  -2  104.69    3.00
   1  -1   2  103.89    2.90
   1  -1   2  104.99    2.80
   1  -1   2  103.69    3.00
   1  -1   2  108.49    2.80
  -2   1  -2   37.60    1.30
  -2   1  -2   36.50    1.00
  -2   1  -2   38.60    1.00
  -2   1  -2   37.40    1.30
   2  -1   2   36.10    1.10
   2  -1   2   34.80    1.30
   2  -1   2   37.60    1.10
   2  -1   2   35.90    1.20
  -3   1  -2  136.19    3.90
  -3   1  -2  135.09    3.70
  -3   1  -2  131.89    4.00
  -3   1  -2  143.59    3.70
   3  -1   2  132.29    3.80
   3  -1   2  135.59    3.70
   3  -1   2  136.59    4.00
  -4   1  -2   17.40    0.70
  -4   1  -2   16.50    1.00
  -4   1  -2   19.00    0.80
  -4   1  -2   18.90    0.90
   4  -1   2   16.50    0.80
   4  -1   2   17.20    0.90
   4  -1   2   18.20    0.70
  -5   1  -2   81.59    2.80
  -5   1  -2   84.19    2.80
  -5   1  -2   82.79    2.50
  -5   1  -2   91.89    2.60
   5  -1   2   86.09    2.70
   5  -1   2   84.19    2.80
   5  -1   2   82.29    2.50
  -6   1  -2   38.70    1.70
  -6   1  -2   43.00    1.70
  -6   1  -2   37.40    1.40
   6  -1   2   36.50    1.70
   6  -1   2   36.10    1.60
   6  -1   2   37.00    1.40
  -7   1  -2   11.30    1.10
  -7   1  -2   10.70    1.10
  -7   1  -2   12.20    0.80
   7  -1   2   11.10    0.80
   7  -1   2   13.00    1.10
   7  -1   2   12.80    1.10
  -8   1  -2    4.10    0.90
  -8   1  -2    4.20    0.60
  -8   1  -2    6.20    1.10
   8  -1   2    5.90    1.00
   8  -1   2    5.50    1.00
   8  -1   2    5.90    0.70
  -9   1  -2    3.60    1.00
  -9   1  -2    4.00    1.10
  -9   1  -2    4.10    0.70
   9  -1   2    4.80    1.10
   9  -1   2    4.80    0.80
   9  -1   2    4.10    1.00
 -10   1  -2   25.50    2.20
 -10   1  -2   29.90    2.20
 -10   1  -2   29.90    1.60
  10  -1   2   31.40    2.10
  10  -1   2   28.40    1.70
  10  -1   2   27.90    2.20
 -11   1  -2    0.30    1.40
 -11   1  -2    1.00    0.90
  11  -1   2    0.80    1.30
  11  -1   2    0.90    1.10
  11  -1   2    0.50    1.30
  12  -1   2    8.40    2.20
  12   0  -2    0.80    1.70
 -12   0   2    1.50    1.50
 -12   0   2    0.40    1.30
  11   0  -2    4.30    1.40
 -11   0   2    7.10    1.30
 -11   0   2    5.40    1.40
  10   0  -2   38.90    2.40
 -10   0   2   39.00    2.20
 -10   0   2   36.40    2.00
   9   0  -2   87.69    3.50
  -9   0   2   90.99    3.30
  -9   0   2   91.79    3.20
   8   0  -2   24.30    1.60
   8   0  -2   23.60    1.60
  -8   0   2   27.70    1.50
  -8   0   2   25.30    1.50
   7   0  -2    8.90    0.90
   7   0  -2    8.70    0.90
   7   0  -2    8.60    0.90
   7   0  -2   10.10    1.00
  -7   0   2    9.00    1.00
  -7   0   2    9.40    0.90
   6   0  -2   48.00    1.60
   6   0  -2   47.60    1.70
   6   0  -2   47.20    1.90
   6   0  -2   46.80    1.80
  -6   0   2   44.80    1.70
  -6   0   2   47.20    1.60
  -6   0   2   43.60    1.70
  -6   0   2   39.90    1.70
   5   0  -2    6.30    0.70
   5   0  -2    5.00    0.50
   5   0  -2    5.80    0.60
   5   0  -2    6.30    0.60
  -5   0   2    4.90    0.60
  -5   0   2    5.40    0.60
  -5   0   2    4.80    0.60
  -5   0   2    6.90    0.50
   4   0  -2   16.10    0.70
   4   0  -2   15.60    0.70
   4   0  -2   15.10    0.80
   4   0  -2   13.40    0.80
  -4   0   2   14.00    0.70
  -4   0   2   15.00    0.80
  -4   0   2   16.20    0.70
  -4   0   2   14.40    0.70
   3   0  -2  268.87    7.20
   3   0  -2  268.67    7.10
   3   0  -2  275.07    7.10
   3   0  -2  265.97    7.20
  -3   0   2  248.78    7.10
  -3   0   2  256.17    7.10
  -3   0   2  267.47    7.20
   2   0  -2  681.53   17.70
   2   0  -2  682.53   17.90
   2   0  -2  682.83   17.80
  -2   0   2  678.63   17.80
  -2   0   2  648.74   17.70
  -2   0   2  674.23   17.80
   1   0  -2  623.94   16.40
   1   0  -2  639.54   16.40
  -1   0   2  620.44   16.40
  -1   0   2  609.44   16.30
   0   0  -2    1.30    0.20
   0   0  -2    1.40    0.20
   0   0  -2    1.00    0.20
   0   0   2    1.00    0.10
  -1   0  -2  115.99    3.20
  -1   0  -2  112.19    3.20
  -1   0  -2  120.09    3.20
  -2   0  -2   78.09    2.10
  -2   0  -2   79.89    2.10
  -2   0  -2   76.19    2.20
  -2   0  -2   80.09    2.30
   2   0   2   75.59    2.10
   2   0   2   75.19    2.10
   2   0   2   74.89    2.20
  -3   0  -2  316.57    8.70
  -3   0  -2  318.47    8.40
  -3   0  -2  326.07    8.40
  -3   0  -2  318.07    8.60
   3   0   2  309.07    8.40
  -4   0  -2  119.79    3.50
  -4   0  -2  125.49    3.40
  -4   0  -2  120.79    3.30
  -4   0  -2  120.59    3.60
   4   0   2  119.89    3.30
   4   0   2  117.29    3.50
  -5   0  -2    0.50    0.40
  -5   0  -2    0.90    0.40
  -5   0  -2    0.60    0.40
  -5   0  -2    0.80    0.30
   5   0   2    0.60    0.30
   5   0   2    0.80    0.40
  -6   0  -2   49.00    1.70
  -6   0  -2   48.90    2.00
  -6   0  -2   53.69    1.90
   6   0   2   53.89    2.00
   6   0   2   53.39    1.70
  -7   0  -2    8.80    0.70
  -7   0  -2    7.00    0.90
  -7   0  -2   10.20    1.00
   7   0   2    8.90    0.70
   7   0   2    9.40    1.10
   7   0   2    7.60    0.90
  -8   0  -2  142.29    4.40
  -8   0  -2  135.29    4.00
  -8   0  -2  138.09    4.50
   8   0   2  137.99    4.40
   8   0   2  134.09    4.10
   8   0   2  133.99    4.40
  -9   0  -2   56.69    2.50
  -9   0  -2   58.29    2.10
  -9   0  -2   54.49    2.40
   9   0   2   55.99    2.40
   9   0   2   53.29    2.40
   9   0   2   55.99    2.10
 -10   0  -2    1.50    0.70
 -10   0  -2    1.10    1.00
 -10   0  -2    1.40    1.20
  10   0   2    1.10    0.80
  10   0   2    2.40    1.20
  10   0   2    1.50    1.10
 -11   0  -2    0.10    1.40
 -11   0  -2   -0.30    1.10
 -11   0  -2    0.50    0.80
  11   0   2    0.30    1.30
  11   0   2    0.70    0.90
  11   0   2    0.00    1.30
 -12   0  -2    1.00    1.60
 -12   0  -2    0.60    1.00
  12   0   2   -0.10    1.50
  11  -1  -2    0.30    1.40
 -11   1   2    0.10    1.10
 -11   1   2    0.20    1.50
  10  -1  -2   -0.10    1.10
 -10   1   2   -0.30    0.90
 -10   1   2    0.20    1.00
   9  -1  -2   26.90    1.80
  -9   1   2   24.60    1.70
  -9   1   2   27.20    1.60
   8  -1  -2    8.80    1.20
  -8   1   2    8.70    1.10
  -8   1   2    9.10    1.10
   7  -1  -2    3.40    0.80
   7  -1  -2    2.60    0.80
   7  -1  -2    3.90    0.70
   7  -1  -2    3.20    0.70
  -7   1   2    3.40    0.80
  -7   1   2    3.00    0.60
   6  -1  -2  223.48    6.10
   6  -1  -2  207.28    6.20
   6  -1  -2  219.08    6.00
   6  -1  -2  206.18    6.10
  -6   1   2  210.48    6.20
  -6   1   2  209.48    6.00
  -6   1   2  209.38    6.20
   5  -1  -2   70.09    2.30
   5  -1  -2   68.09    2.40
   5  -1  -2   69.49    2.30
   5  -1  -2   74.09    2.20
  -5   1   2   68.89    2.40
  -5   1   2   70.59    2.20
  -5   1   2   67.99    2.30
   4  -1  -2  200.98    5.70
   4  -1  -2  198.08    5.60
   4  -1  -2  204.98    5.60
   4  -1  -2  204.48    5.70
  -4   1   2  206.08    5.60
  -4   1   2  199.08    5.70
  -4   1   2  204.28    5.60
   3  -1  -2   16.90    0.80
   3  -1  -2   17.00    0.70
   3  -1  -2   18.00    0.70
   3  -1  -2   16.60    0.80
  -3   1   2   15.20    0.80
  -3   1   2   15.80    0.70
  -3   1   2   17.00    0.70
   2  -1  -2    2.20    0.30
   2  -1  -2    3.30    0.30
   2  -1  -2    2.70    0.30
   2  -1  -2    2.50    0.30
  -2   1   2    2.50    0.30
  -2   1   2    2.60    0.30
  -2   1   2    2.80    0.30
   1  -1  -2    4.70    0.30
   1  -1  -2    5.40    0.40
   1  -1  -2    5.50    0.30
  -1   1   2    4.80    0.30
  -1   1   2    5.40    0.30
   0  -1  -2   44.50    1.30
   0  -1  -2   45.50    1.20
   0   1   2   44.00    1.20
   0   1   2   43.00    1.20
  -1  -1  -2  121.39    3.30
  -1  -1  -2  118.19    3.20
  -1  -1  -2  123.09    3.30
  -1  -1  -2  121.89    3.20
   1   1   2  118.59    3.20
  -2  -1  -2  464.35   12.10
  -2  -1  -2  470.85   12.10
  -2  -1  -2  455.45   12.20
  -2  -1  -2  460.05   12.10
   2   1   2  448.96   12.20
   2   1   2  462.75   12.10
  -3  -1  -2   20.40    0.70
  -3  -1  -2   21.10    0.80
  -3  -1  -2   19.70    0.80
   3   1   2   18.50    0.80
   3   1   2   19.90    0.70
  -4  -1  -2  397.16   10.70
  -4  -1  -2  390.36   10.60
   4   1   2  388.76   10.40
   4   1   2  396.46   10.60
  -5  -1  -2   36.00    1.40
  -5  -1  -2   35.50    1.30
  -5  -1  -2   36.20    1.20
   5   1   2   32.40    1.40
   5   1   2   37.50    1.20
   5   1   2   35.20    1.30
  -6  -1  -2   16.60    1.10
  -6  -1  -2   17.20    0.80
  -6  -1  -2   17.70    1.00
   6   1   2   16.40    1.00
   6   1   2   17.90    0.80
  -7  -1  -2   21.20    1.00
  -7  -1  -2   22.50    1.20
  -7  -1  -2   20.50    1.30
   7   1   2   19.70    1.20
   7   1   2   24.30    1.00
  -8  -1  -2   19.80    1.30
  -8  -1  -2   19.40    1.00
  -8  -1  -2   21.50    1.50
   8   1   2   20.60    1.10
   8   1   2   18.50    1.30
  -9  -1  -2  274.77    7.80
  -9  -1  -2  258.07    7.60
  -9  -1  -2  255.47    7.30
   9   1   2  250.27    7.30
   9   1   2  253.17    7.70
   9   1   2  261.37    7.70
 -10  -1  -2   18.60    1.20
 -10  -1  -2   16.90    1.50
 -10  -1  -2   21.60    1.70
  10   1   2   18.20    1.40
  10   1   2   20.80    1.80
  10   1   2   17.40    1.60
 -11  -1  -2   24.60    2.20
 -11  -1  -2   22.00    1.50
 -11  -1  -2   22.00    1.80
  11   1   2   23.90    2.10
  11   1   2   24.20    2.10
  11   1   2   22.70    1.70
 -12  -1  -2    2.30    1.00
 -12  -1  -2    1.50    1.30
  12   1   2    2.50    1.40
  11  -2  -2    1.10    1.50
 -11   2   2    1.20    1.30
 -11   2   2    2.10    1.60
  10  -2  -2    2.30    1.40
 -10   2   2    1.70    1.20
 -10   2   2    2.10    1.00
   9  -2  -2    1.70    1.10
  -9   2   2    0.70    0.80
  -9   2   2    1.20    1.00
   8  -2  -2    4.30    1.10
  -8   2   2    4.20    0.90
  -8   2   2    3.70    1.00
   7  -2  -2   17.00    1.30
   7  -2  -2   17.40    1.20
   7  -2  -2   17.00    1.30
  -7   2   2   16.70    1.30
  -7   2   2   18.00    1.20
   6  -2  -2   36.30    1.60
   6  -2  -2   35.50    1.50
   6  -2  -2   35.50    1.70
   6  -2  -2   33.00    1.60
  -6   2   2   40.10    1.70
  -6   2   2   38.20    1.60
   5  -2  -2  211.08    6.10
   5  -2  -2  206.08    6.20
   5  -2  -2  213.48    6.10
   5  -2  -2  219.58    6.00
  -5   2   2  215.98    6.10
  -5   2   2  217.98    6.20
  -5   2   2  227.38    6.00
   4  -2  -2  271.17    7.60
   4  -2  -2  269.97    7.70
   4  -2  -2  275.67    7.70
   4  -2  -2  287.97    7.70
  -4   2   2  276.97    7.60
  -4   2   2  274.47    7.70
  -4   2   2  289.47    7.60
   3  -2  -2  505.45   13.60
   3  -2  -2  503.25   13.60
   3  -2  -2  510.35   13.60
   3  -2  -2  498.65   13.50
  -3   2   2  507.15   13.50
  -3   2   2  507.35   13.60
  -3   2   2  512.85   13.50
   2  -2  -2  120.79    3.40
   2  -2  -2  127.69    3.50
   2  -2  -2  125.09    3.50
   2  -2  -2  123.29    3.50
  -2   2   2  120.89    3.40
  -2   2   2  116.29    3.50
  -2   2   2  121.29    3.50
   1  -2  -2  520.05   13.80
   1  -2  -2  496.35   13.80
   1  -2  -2  510.75   13.80
   1  -2  -2  526.05   13.80
  -1   2   2  514.85   13.80
  -1   2   2  541.35   13.80
  -1   2   2  539.45   13.80
   0  -2  -2 9999.00  252.97
   0  -2  -2 9561.24  252.67
   0  -2  -2 9441.56  253.07
   0   2   2 9623.04  252.67
  -1  -2  -2 1304.37   33.70
  -1  -2  -2 1313.97   33.70
   1   2   2 1230.88   33.50
  -2  -2  -2 3152.78   82.79
  -2  -2  -2 3198.18   82.19
  -2  -2  -2 3225.68   82.59
  -2  -2  -2 3099.19   82.09
   2   2   2 3095.79   82.49
   2   2   2 3031.90   82.19
  -3  -2  -2    6.40    0.50
  -3  -2  -2    7.70    0.40
  -3  -2  -2    7.90    0.40
   3   2   2    7.00    0.50
   3   2   2    7.80    0.40
  -4  -2  -2   70.99    2.10
  -4  -2  -2   72.69    2.20
  -4  -2  -2   72.69    2.30
   4   2   2   73.59    2.10
   4   2   2   71.39    2.20
  -5  -2  -2    1.40    0.40
  -5  -2  -2    0.90    0.50
  -5  -2  -2    1.10    0.30
   5   2   2    1.40    0.30
   5   2   2    1.70    0.40
   5   2   2    1.30    0.40
  -6  -2  -2  104.29    3.20
  -6  -2  -2  109.39    3.30
  -6  -2  -2  107.29    3.40
   6   2   2  106.49    3.40
   6   2   2  118.09    3.30
   6   2   2  110.89    3.20
  -7  -2  -2  129.29    3.80
  -7  -2  -2  131.99    4.10
  -7  -2  -2  133.39    4.00
   7   2   2  136.49    3.80
   7   2   2  126.69    4.10
  -8  -2  -2   45.40    2.00
  -8  -2  -2   44.50    1.70
  -8  -2  -2   43.20    1.80
   8   2   2   46.80    1.90
   8   2   2   41.80    1.60
  -9  -2  -2   34.30    1.70
  -9  -2  -2   37.80    1.50
  -9  -2  -2   35.20    1.90
   9   2   2   35.30    1.50
   9   2   2   30.90    1.80
 -10  -2  -2    9.30    1.20
 -10  -2  -2    8.10    0.90
 -10  -2  -2    9.10    1.30
  10   2   2    8.10    0.90
  10   2   2    8.90    1.30
 -11  -2  -2    0.20    1.00
 -11  -2  -2    1.70    1.30
 -11  -2  -2    0.80    0.70
  11   2   2    0.50    1.10
  11   2   2    0.40    0.90
  11   2   2    0.80    1.20
 -12  -2  -2   13.40    1.50
 -12  -2  -2   12.20    1.70
  12   2   2   10.50    1.60
 -13  -2  -2    1.60    1.50
 -13  -2  -2    1.30    1.10
  13   2   2    2.30    1.70
 -11   3   2    4.40    1.50
  10  -3  -2   14.60    2.00
 -10   3   2   16.20    1.80
 -10   3   2   14.80    1.90
   9  -3  -2  138.39    4.90
  -9   3   2  138.19    4.80
  -9   3   2  135.19    4.50
   8  -3  -2   24.70    1.90
  -8   3   2   23.50    1.60
  -8   3   2   24.40    1.70
   7  -3  -2   42.50    2.00
   7  -3  -2   43.70    2.10
  -7   3   2   41.30    1.80
  -7   3   2   43.40    2.00
   6  -3  -2    0.20    0.60
   6  -3  -2    0.80    0.50
   6  -3  -2    0.70    0.80
  -6   3   2    0.60    0.60
  -6   3   2    0.20    0.50
   5  -3  -2   52.69    2.10
   5  -3  -2   56.59    2.10
   5  -3  -2   55.79    2.10
   5  -3  -2   57.89    1.90
  -5   3   2   56.59    2.00
  -5   3   2   51.49    2.10
   4  -3  -2   -0.10    0.40
   4  -3  -2    0.00    0.40
   4  -3  -2    0.10    0.50
   4  -3  -2    0.10    0.40
  -4   3   2    0.10    0.40
  -4   3   2   -0.10    0.40
  -4   3   2    0.20    0.40
   3  -3  -2    0.90    0.40
   3  -3  -2    1.10    0.40
   3  -3  -2    1.30    0.40
   3  -3  -2    0.90    0.40
  -3   3   2    1.40    0.40
  -3   3   2    1.30    0.40
  -3   3   2    0.90    0.40
   2  -3  -2   39.50    1.40
   2  -3  -2   36.70    1.40
   2  -3  -2   38.90    1.30
   2  -3  -2   40.00    1.40
  -2   3   2   37.90    1.30
  -2   3   2   35.80    1.30
  -2   3   2   35.20    1.30
   1  -3  -2  209.68    5.90
   1  -3  -2  212.38    5.90
   1  -3  -2  217.08    5.90
   1  -3  -2  210.18    5.80
  -1   3   2  213.08    5.80
  -1   3   2  217.08    5.80
  -1   3   2  219.98    5.90
   0  -3  -2 2544.85   68.39
   0  -3  -2 2614.04   68.79
   0  -3  -2 2570.74   68.29
   0   3   2 2625.94   68.69
   0   3   2 2672.33   68.59
   0   3   2 2622.84   68.69
  -1  -3  -2   43.70    1.40
  -1  -3  -2   43.20    1.50
  -1  -3  -2   45.00    1.40
  -1  -3  -2   46.40    1.30
   1   3   2   44.50    1.40
   1   3   2   45.80    1.30
   1   3   2   44.20    1.30
  -2  -3  -2  106.39    3.20
  -2  -3  -2  112.49    3.00
  -2  -3  -2  110.19    3.00
  -2  -3  -2  111.69    3.10
  -2  -3  -2  112.09    3.10
   2   3   2  106.09    3.10
   2   3   2  113.09    3.10
   2   3   2  107.99    3.00
  -3  -3  -2   20.70    0.80
  -3  -3  -2   21.50    0.80
  -3  -3  -2   20.90    0.70
  -3  -3  -2   20.50    0.90
   3   3   2   20.90    0.80
   3   3   2   22.50    0.80
   3   3   2   22.10    0.80
  -4  -3  -2  120.79    3.30
  -4  -3  -2  114.79    3.40
  -4  -3  -2  114.99    3.30
  -4  -3  -2  115.29    3.30
   4   3   2  120.19    3.30
   4   3   2  112.79    3.40
  -5  -3  -2  101.59    3.20
  -5  -3  -2  103.09    3.00
  -5  -3  -2  105.49    3.00
  -5  -3  -2  103.69    3.00
   5   3   2  105.69    3.10
   5   3   2  106.29    3.20
   5   3   2  102.09    3.00
  -6  -3  -2   80.39    2.50
  -6  -3  -2   77.49    2.40
  -6  -3  -2   82.19    2.40
  -6  -3  -2   73.49    2.60
   6   3   2   78.09    2.60
   6   3   2   81.39    2.40
   6   3   2   78.69    2.50
  -7  -3  -2   34.40    1.40
  -7  -3  -2   31.20    1.30
  -7  -3  -2   30.80    1.50
   7   3   2   35.20    1.50
   7   3   2   32.70    1.30
  -8  -3  -2    6.90    0.80
  -8  -3  -2    6.80    0.90
  -8  -3  -2    8.10    0.80
   8   3   2    5.90    0.80
   8   3   2    6.50    0.70
  -9  -3  -2   17.20    1.30
  -9  -3  -2   15.80    1.20
  -9  -3  -2   17.00    1.10
   9   3   2   16.00    1.40
   9   3   2   18.10    1.10
 -10  -3  -2    0.10    1.00
 -10  -3  -2    0.10    0.60
 -10  -3  -2   -0.30    0.70
  10   3   2    0.40    0.80
  10   3   2    0.10    0.70
 -11  -3  -2   56.49    2.30
 -11  -3  -2   51.39    2.50
 -11  -3  -2   64.19    2.90
  11   3   2   59.59    2.40
  11   3   2   59.49    2.70
 -12  -3  -2   48.60    2.70
 -12  -3  -2   50.99    2.30
  12   3   2   45.50    2.70
 -13  -3  -2    0.00    1.60
 -13  -3  -2    0.00    1.00
  13   3   2   -0.20    1.40
 -10   4   2    1.40    1.20
 -10   4   2    3.20    1.60
   9  -4  -2   39.60    2.60
  -9   4   2   39.20    2.20
  -9   4   2   39.70    2.50
   8  -4  -2   19.20    1.80
  -8   4   2   18.10    1.70
   7  -4  -2   18.30    1.60
   7  -4  -2   19.40    1.60
  -7   4   2   16.20    1.50
   6  -4  -2    0.50    0.70
   6  -4  -2    0.40    0.70
   6  -4  -2    0.20    0.60
  -6   4   2    0.20    0.70
  -6   4   2    0.10    0.60
   5  -4  -2    8.40    1.10
   5  -4  -2    8.40    0.90
   5  -4  -2    7.20    0.90
  -5   4   2    8.40    0.90
  -5   4   2    8.70    1.00
   4  -4  -2    0.00    0.40
   4  -4  -2    0.30    0.60
   4  -4  -2    0.50    0.60
   4  -4  -2    0.10    0.60
  -4   4   2    0.20    0.50
  -4   4   2    0.10    0.50
   3  -4  -2    7.30    0.70
   3  -4  -2    6.80    0.80
   3  -4  -2    6.90    0.80
   3  -4  -2    7.90    0.70
  -3   4   2   11.50    0.70
  -3   4   2    7.00    0.80
  -3   4   2   10.00    0.70
   2  -4  -2  234.08    6.60
   2  -4  -2  239.18    6.50
   2  -4  -2  237.58    6.70
   2  -4  -2  243.58    6.60
  -2   4   2  233.08    6.60
  -2   4   2  242.78    6.50
  -2   4   2  231.48    6.60
   1  -4  -2  114.39    3.40
   1  -4  -2  116.19    3.30
   1  -4  -2  124.29    3.60
   1  -4  -2  120.99    3.40
  -1   4   2  118.29    3.40
  -1   4   2  115.09    3.40
  -1   4   2  112.19    3.30
   0  -4  -2  631.84   17.10
   0  -4  -2  647.04   16.90
   0  -4  -2  657.53   17.00
   0  -4  -2  638.34   17.00
   0   4   2  642.54   17.00
   0   4   2  632.94   17.00
   0   4   2  634.74   16.90
  -1  -4  -2   25.80    1.00
  -1  -4  -2   24.70    0.90
  -1  -4  -2   24.20    0.90
  -1  -4  -2   24.10    0.90
   1   4   2   23.60    0.90
   1   4   2   23.90    0.80
   1   4   2   24.10    0.90
  -2  -4  -2   12.20    0.50
  -2  -4  -2   10.50    0.70
  -2  -4  -2   10.30    0.60
  -2  -4  -2   11.40    0.60
  -2  -4  -2   12.10    0.60
   2   4   2   11.00    0.60
   2   4   2   12.10    0.60
   2   4   2   11.70    0.60
  -3  -4  -2  113.09    3.20
  -3  -4  -2  109.69    3.40
  -3  -4  -2  114.99    3.10
   3   4   2  114.09    3.20
   3   4   2  114.89    3.20
  -4  -4  -2  198.18    5.70
  -4  -4  -2  188.08    5.50
  -4  -4  -2  204.78    5.50
  -4  -4  -2  201.18    5.50
   4   4   2  201.18    5.50
   4   4   2  197.78    5.60
   4   4   2  207.08    5.60
  -5  -4  -2  673.63   18.00
  -5  -4  -2  666.73   18.00
  -5  -4  -2  696.93   18.00
  -5  -4  -2  660.33   18.20
   5   4   2  675.23   18.10
   5   4   2  700.63   18.10
   5   4   2  676.13   18.00
  -6  -4  -2  226.48    6.50
  -6  -4  -2  230.58    6.40
  -6  -4  -2  228.18    6.40
  -6  -4  -2  233.58    6.30
   6   4   2  230.48    6.50
   6   4   2  223.28    6.30
   6   4   2  229.88    6.40
  -7  -4  -2    1.50    0.40
  -7  -4  -2    1.70    0.60
  -7  -4  -2    1.60    0.50
   7   4   2    2.00    0.60
   7   4   2    2.20    0.50
   7   4   2    1.10    0.50
  -8  -4  -2    2.00    0.70
  -8  -4  -2    2.30    0.60
  -8  -4  -2    2.50    0.50
   8   4   2    2.10    0.50
   8   4   2    2.40    0.70
  -9  -4  -2   11.80    1.00
  -9  -4  -2   10.10    1.00
  -9  -4  -2   12.80    1.20
   9   4   2   10.30    1.10
   9   4   2   10.60    1.00
 -10  -4  -2   24.30    1.40
 -10  -4  -2   23.50    1.70
 -10  -4  -2   20.90    1.50
  10   4   2   24.60    1.70
  10   4   2   24.20    1.40
 -11  -4  -2   11.00    1.20
 -11  -4  -2   11.70    1.40
 -11  -4  -2   11.20    1.60
  11   4   2    9.40    1.40
 -12  -4  -2   11.40    1.40
 -12  -4  -2   11.00    1.60
  12   4   2   12.60    1.70
 -13  -4  -2    3.90    1.20
 -13  -4  -2    3.90    1.60
  13   4   2    3.10    1.80
  -9   5   2   52.89    2.60
  -9   5   2   53.59    3.00
  -8   5   2    0.10    0.90
  -8   5   2    1.10    1.10
   7  -5  -2   26.40    1.90
  -7   5   2   26.40    1.80
  -7   5   2   22.20    1.60
   6  -5  -2   90.59    3.20
   6  -5  -2   86.29    3.30
  -6   5   2   87.89    3.10
  -6   5   2   87.19    3.30
   5  -5  -2    2.30    0.70
   5  -5  -2    4.60    1.00
   5  -5  -2    3.50    0.90
  -5   5   2    5.90    0.80
  -5   5   2    2.50    0.80
   4  -5  -2   75.89    2.80
   4  -5  -2   73.59    2.60
  -4   5   2   75.19    2.70
  -4   5   2   75.29    2.60
   3  -5  -2   50.29    1.90
   3  -5  -2   51.09    1.80
   3  -5  -2   47.70    1.80
   3  -5  -2   49.99    2.00
  -3   5   2   46.60    1.80
  -3   5   2   45.80    1.80
   2  -5  -2    3.20    0.60
   2  -5  -2    3.00    0.60
   2  -5  -2    2.00    0.50
   2  -5  -2    3.30    0.50
  -2   5   2    2.80    0.50
  -2   5   2    2.80    0.50
  -2   5   2    3.30    0.60
   1  -5  -2   16.10    0.90
   1  -5  -2   16.50    0.80
   1  -5  -2   16.00    0.80
   1  -5  -2   17.80    1.00
  -1   5   2   17.50    0.80
  -1   5   2   14.90    0.90
  -1   5   2   17.60    0.90
   0  -5  -2   74.59    2.20
   0  -5  -2   73.69    2.50
   0  -5  -2   73.29    2.30
   0  -5  -2   74.39    2.20
   0   5   2   70.59    2.30
   0   5   2   73.79    2.30
   0   5   2   75.89    2.20
  -1  -5  -2   41.60    1.60
  -1  -5  -2   40.80    1.50
  -1  -5  -2   41.50    1.40
  -1  -5  -2   42.20    1.40
   1   5   2   41.00    1.40
   1   5   2   40.60    1.40
   1   5   2   42.20    1.40
  -2  -5  -2    4.30    0.60
  -2  -5  -2    4.20    0.40
  -2  -5  -2    4.30    0.40
  -2  -5  -2    4.30    0.40
  -2  -5  -2    4.20    0.50
   2   5   2    3.70    0.40
   2   5   2    4.40    0.50
   2   5   2    4.60    0.40
   2   5   2    4.60    0.50
  -3  -5  -2  126.69    3.50
  -3  -5  -2  128.19    3.50
  -3  -5  -2  123.69    3.60
  -3  -5  -2  117.39    3.70
   3   5   2  124.89    3.50
   3   5   2  125.29    3.50
   3   5   2  121.89    3.60
  -4  -5  -2  160.68    4.40
  -4  -5  -2  166.78    4.50
  -4  -5  -2  158.58    4.50
  -4  -5  -2  161.28    4.70
   4   5   2  157.08    4.60
   4   5   2  159.38    4.50
   4   5   2  157.88    4.50
  -5  -5  -2    0.90    0.30
  -5  -5  -2    1.00    0.40
  -5  -5  -2    1.10    0.40
  -5  -5  -2    0.80    0.40
   5   5   2    1.10    0.50
   5   5   2    1.10    0.40
   5   5   2    0.70    0.40
  -6  -5  -2  359.56    9.70
  -6  -5  -2  374.56    9.70
  -6  -5  -2  341.57    9.90
   6   5   2  342.37    9.60
   6   5   2  361.36    9.80
   6   5   2  358.16    9.80
  -7  -5  -2    5.20    0.60
  -7  -5  -2    4.70    0.80
  -7  -5  -2    5.90    0.70
   7   5   2    5.40    0.70
   7   5   2    5.60    0.60
   7   5   2    5.30    0.70
  -8  -5  -2    0.10    0.50
  -8  -5  -2    0.20    0.50
  -8  -5  -2    0.50    0.70
   8   5   2    0.20    0.50
   8   5   2   -0.10    0.60
  -9  -5  -2   80.59    3.00
  -9  -5  -2   77.29    2.90
  -9  -5  -2   81.39    2.80
   9   5   2   86.19    3.00
 -10  -5  -2   74.79    2.90
 -10  -5  -2   81.19    2.80
 -10  -5  -2   82.69    3.20
  10   5   2   82.09    3.10
  10   5   2   81.79    2.80
 -11  -5  -2   58.89    2.50
 -11  -5  -2   60.19    2.40
 -11  -5  -2   54.49    3.80
  11   5   2   58.59    2.70
 -12  -5  -2   46.10    2.20
 -12  -5  -2   49.00    2.40
  12   5   2   44.40    2.60
 -13  -5  -2    6.80    1.30
 -13  -5  -2    6.00    1.50
  13   5   2    9.80    1.80
  -8   6   2   25.50    2.50
  -8   6   2   27.40    2.00
   7  -6  -2    0.40    1.20
  -7   6   2    0.40    0.80
  -7   6   2   -0.10    1.10
   6  -6  -2   35.30    2.20
  -6   6   2   33.80    2.00
  -6   6   2   29.20    1.70
   5  -6  -2   41.30    2.00
   5  -6  -2   37.80    2.10
  -5   6   2   40.30    1.90
  -5   6   2   42.10    2.10
   4  -6  -2   -0.30    0.80
   4  -6  -2    0.20    0.60
  -4   6   2    0.00    0.60
  -4   6   2    0.20    0.70
   3  -6  -2  282.97    7.80
   3  -6  -2  287.67    7.80
   3  -6  -2  268.97    8.10
  -3   6   2  278.27    8.00
  -3   6   2  272.37    7.80
   2  -6  -2    3.10    0.60
   2  -6  -2    2.50    0.70
   2  -6  -2    4.20    0.60
   2  -6  -2    3.30    0.70
  -2   6   2    2.00    0.60
  -2   6   2    2.30    0.50
   1  -6  -2   26.20    1.10
   1  -6  -2   25.70    1.30
   1  -6  -2   25.90    1.10
   1  -6  -2   25.80    1.40
  -1   6   2   23.80    1.20
  -1   6   2   25.10    1.20
   0  -6  -2  198.48    6.00
   0  -6  -2  207.78    5.60
   0  -6  -2  198.38    5.70
   0  -6  -2  205.08    5.80
   0   6   2  206.78    5.80
   0   6   2  209.38    5.70
   0   6   2  201.58    5.80
  -1  -6  -2   49.90    1.70
  -1  -6  -2   50.69    1.90
  -1  -6  -2   49.70    1.80
  -1  -6  -2   51.39    1.60
   1   6   2   48.80    1.70
   1   6   2   52.19    1.70
   1   6   2   46.40    1.70
  -2  -6  -2  137.79    3.90
  -2  -6  -2  132.49    4.10
  -2  -6  -2  137.79    3.90
  -2  -6  -2  136.39    3.80
  -2  -6  -2  131.09    4.00
   2   6   2  139.89    3.90
   2   6   2  130.79    3.90
   2   6   2  134.79    3.90
   2   6   2  142.39    3.80
  -3  -6  -2  168.48    5.10
  -3  -6  -2  173.28    4.90
  -3  -6  -2  178.18    4.80
  -3  -6  -2  173.18    4.90
   3   6   2  176.18    4.90
   3   6   2  174.48    4.80
   3   6   2  173.28    4.90
  -4  -6  -2    5.80    0.60
  -4  -6  -2    5.90    0.60
  -4  -6  -2    4.90    0.60
  -4  -6  -2    3.50    0.60
   4   6   2    6.10    0.60
   4   6   2    5.90    0.60
   4   6   2    5.10    0.60
  -5  -6  -2    5.70    0.60
  -5  -6  -2    5.90    0.60
  -5  -6  -2    4.00    0.50
  -5  -6  -2    4.00    0.70
   5   6   2    4.80    0.60
   5   6   2    5.30    0.70
   5   6   2    4.70    0.50
  -6  -6  -2    5.40    0.70
  -6  -6  -2    5.80    0.80
  -6  -6  -2    4.60    0.80
  -6  -6  -2    4.60    0.60
   6   6   2    5.70    0.70
   6   6   2    5.60    0.70
  -7  -6  -2    0.10    0.60
  -7  -6  -2    0.10    0.50
  -7  -6  -2    0.00    0.50
   7   6   2   -0.10    0.60
   7   6   2   -0.10    0.50
   7   6   2    0.00    0.50
  -8  -6  -2   21.60    1.20
  -8  -6  -2   20.80    1.40
  -8  -6  -2   21.70    1.30
   8   6   2   20.90    1.20
   8   6   2   22.70    1.30
  -9  -6  -2   19.70    1.50
  -9  -6  -2   16.30    1.20
  -9  -6  -2   15.60    1.30
   9   6   2   17.10    1.30
   9   6   2   17.60    1.20
 -10  -6  -2    6.10    1.00
 -10  -6  -2    5.20    1.10
 -10  -6  -2    6.40    0.90
  10   6   2    7.50    1.20
 -11  -6  -2   76.29    2.80
 -11  -6  -2   69.99    2.80
  11   6   2   69.69    3.10
 -12  -6  -2    0.90    1.10
 -12  -6  -2    1.70    1.00
  12   6   2    0.20    1.10
 -13  -6  -2    0.80    1.50
 -13  -6  -2    0.40    1.10
  13   6   2    0.60    1.40
  -8   7   2   -0.20    1.50
  -8   7   2    0.10    1.30
   7  -7  -2    1.80    1.60
  -7   7   2    1.70    1.10
  -7   7   2    2.10    1.50
   6  -7  -2    9.80    1.60
  -6   7   2    8.30    1.20
  -6   7   2    9.80    1.40
   5  -7  -2    1.50    1.10
  -5   7   2    0.60    1.00
  -5   7   2    0.60    0.80
   4  -7  -2   22.90    1.80
   4  -7  -2   21.40    1.40
  -4   7   2   24.50    1.60
  -4   7   2   24.50    1.50
   3  -7  -2    9.40    1.20
   3  -7  -2   11.60    1.00
  -3   7   2   10.60    1.10
  -3   7   2    9.50    1.00
   2  -7  -2    1.90    0.60
   2  -7  -2    2.40    0.90
  -2   7   2    3.00    0.70
  -2   7   2    1.30    0.70
   1  -7  -2   40.30    1.60
   1  -7  -2   46.40    2.00
  -1   7   2   42.10    1.70
  -1   7   2   39.30    1.70
   0  -7  -2   14.20    1.00
   0  -7  -2   15.30    0.90
   0  -7  -2   14.70    1.10
   0   7   2   14.40    1.00
   0   7   2   15.50    1.00
  -1  -7  -2   46.60    1.60
  -1  -7  -2   43.60    1.70
  -1  -7  -2   42.60    1.80
   1   7   2   41.60    1.60
   1   7   2   40.70    1.60
  -2  -7  -2   26.20    1.10
  -2  -7  -2   26.50    1.00
  -2  -7  -2   27.50    1.20
  -2  -7  -2   26.20    1.20
  -2  -7  -2   25.10    1.40
   2   7   2   23.50    1.20
   2   7   2   25.90    1.20
   2   7   2   27.80    1.00
  -3  -7  -2    0.50    0.50
  -3  -7  -2    1.00    0.50
  -3  -7  -2    0.90    0.40
  -3  -7  -2    0.80    0.40
   3   7   2    0.80    0.40
   3   7   2    1.20    0.40
   3   7   2    0.80    0.50
   3   7   2    0.60    0.40
  -4  -7  -2   20.20    1.30
  -4  -7  -2   24.10    1.00
  -4  -7  -2   24.30    1.10
  -4  -7  -2   22.20    1.20
   4   7   2   25.60    1.10
   4   7   2   25.20    1.10
   4   7   2   23.20    1.20
  -5  -7  -2    0.60    0.50
  -5  -7  -2    0.30    0.50
  -5  -7  -2    0.50    0.40
  -5  -7  -2    0.60    0.50
   5   7   2    0.60    0.40
   5   7   2    0.50    0.50
   5   7   2    0.60    0.50
  -6  -7  -2  259.07    7.80
  -6  -7  -2  278.87    7.70
  -6  -7  -2  277.77    7.60
   6   7   2  277.77    7.60
   6   7   2  263.57    7.60
   6   7   2  280.97    7.70
  -7  -7  -2   25.40    1.50
  -7  -7  -2   23.20    1.20
  -7  -7  -2   27.60    1.30
   7   7   2   27.00    1.30
   7   7   2   27.20    1.30
   7   7   2   22.20    1.40
  -8  -7  -2    6.60    0.90
  -8  -7  -2    6.90    0.90
  -8  -7  -2    7.60    1.10
   8   7   2    8.00    1.00
   8   7   2    5.10    0.90
  -9  -7  -2   59.89    2.30
  -9  -7  -2   59.49    2.50
  -9  -7  -2   58.09    2.30
   9   7   2   55.29    2.40
 -10  -7  -2    0.50    1.00
 -10  -7  -2   -0.10    0.70
 -10  -7  -2    0.40    0.70
  10   7   2    0.60    0.90
 -11  -7  -2   43.80    2.10
 -11  -7  -2   40.80    2.20
  11   7   2   42.90    2.40
 -12  -7  -2    7.50    1.20
 -12  -7  -2    6.90    1.40
  12   7   2    5.60    1.40
 -13  -7  -2    9.00    1.40
 -13  -7  -2    9.70    1.80
  13   7   2    6.50    1.80
   7  -8  -2   32.10    2.70
  -7   8   2   31.80    2.90
  -7   8   2   28.80    2.10
   6  -8  -2   -0.20    1.30
  -6   8   2    0.30    1.40
  -6   8   2    0.20    1.00
   5  -8  -2    3.60    1.30
  -5   8   2    3.40    1.00
  -5   8   2    2.80    1.30
   4  -8  -2   11.00    1.50
  -4   8   2   12.10    1.50
  -4   8   2    9.20    1.10
   3  -8  -2   55.79    2.60
  -3   8   2   56.99    2.30
  -3   8   2   57.29    2.50
   2  -8  -2   16.60    1.50
   2  -8  -2   17.30    1.20
  -2   8   2   20.30    1.40
  -2   8   2   20.50    1.30
   1  -8  -2    0.90    0.60
   1  -8  -2    1.10    0.80
  -1   8   2    1.30    0.70
  -1   8   2    1.20    0.60
   0  -8  -2    9.10    0.90
   0  -8  -2    9.20    1.10
   0   8   2    9.10    0.90
   0   8   2    7.80    1.00
  -1  -8  -2    2.20    0.70
  -1  -8  -2    1.70    0.80
  -1  -8  -2    1.60    0.60
   1   8   2    0.90    0.60
   1   8   2    1.80    0.60
  -2  -8  -2  124.39    4.10
  -2  -8  -2  122.39    3.70
  -2  -8  -2  119.29    3.80
  -2  -8  -2  124.89    3.70
   2   8   2  121.69    3.70
   2   8   2  124.09    3.80
  -3  -8  -2   10.60    1.00
  -3  -8  -2   10.80    1.10
  -3  -8  -2   11.80    0.90
  -3  -8  -2   12.30    0.90
   3   8   2   11.70    0.90
   3   8   2   10.70    1.00
  -4  -8  -2    2.70    0.70
  -4  -8  -2    3.30    0.60
  -4  -8  -2    2.10    0.60
  -4  -8  -2    1.20    0.50
   4   8   2    2.70    0.70
  -5  -8  -2   33.40    1.60
  -5  -8  -2   35.60    1.60
  -5  -8  -2   37.40    1.80
  -5  -8  -2   38.40    1.50
   5   8   2   35.50    1.50
   5   8   2   33.90    1.60
  -6  -8  -2   13.20    1.20
  -6  -8  -2   16.70    1.00
  -6  -8  -2   17.40    1.30
   6   8   2   15.50    1.20
   6   8   2   15.90    1.00
  -7  -8  -2  173.18    5.20
  -7  -8  -2  170.98    5.40
  -7  -8  -2  177.38    5.10
   7   8   2  169.68    5.10
   7   8   2  173.28    5.20
  -8  -8  -2  162.98    4.70
  -8  -8  -2  151.28    4.80
   8   8   2  150.78    4.80
  -9  -8  -2    2.90    0.90
  -9  -8  -2    4.60    1.00
  -9  -8  -2    3.70    0.90
   9   8   2    4.20    1.00
 -10  -8  -2    0.90    0.90
 -10  -8  -2    0.50    1.00
 -10  -8  -2    1.30    0.90
  10   8   2    0.30    1.00
 -11  -8  -2    2.80    1.40
 -11  -8  -2    1.30    0.90
  11   8   2    2.70    1.10
 -12  -8  -2  160.78    5.10
  12   8   2  146.29    5.30
 -13  -8  -2    2.70    1.30
  13   8   2    1.00    1.70
   6  -9  -2   26.00    2.90
  -6   9   2   21.60    2.00
  -6   9   2   26.10    2.80
   5  -9  -2   30.60    2.50
  -5   9   2   27.40    1.90
  -5   9   2   27.80    2.40
   4  -9  -2   21.80    2.30
  -4   9   2   23.60    2.10
  -4   9   2   25.20    1.70
   3  -9  -2   35.70    2.20
  -3   9   2   33.80    1.90
  -3   9   2   32.40    2.10
   2  -9  -2   83.69    3.40
  -2   9   2   79.79    3.10
  -2   9   2   77.49    2.90
   1  -9  -2   13.00    1.30
   1  -9  -2   13.30    1.50
  -1   9   2   15.40    1.20
  -1   9   2   15.30    1.50
   0  -9  -2   46.00    1.90
   0  -9  -2   44.40    2.20
   0   9   2   48.20    2.10
   0   9   2   44.90    1.90
  -1  -9  -2   16.00    1.20
  -1  -9  -2   17.80    1.40
   1   9   2   17.90    1.20
   1   9   2   13.70    1.20
  -2  -9  -2   12.10    1.10
  -2  -9  -2    8.90    1.00
  -2  -9  -2   10.40    1.20
   2   9   2    8.70    1.00
   2   9   2   11.60    1.10
  -3  -9  -2    0.40    0.60
  -3  -9  -2    0.00    0.70
  -3  -9  -2    0.10    0.60
   3   9   2    0.20    0.60
   3   9   2    0.90    0.60
  -4  -9  -2   48.50    2.00
  -4  -9  -2   47.50    2.20
  -4  -9  -2   49.50    1.90
   4   9   2   48.00    2.00
  -5  -9  -2   18.80    1.20
  -5  -9  -2   16.40    1.30
  -5  -9  -2   16.90    1.40
   5   9   2   16.80    1.20
  -6  -9  -2    0.60    0.80
  -6  -9  -2    0.60    0.80
   6   9   2    0.40    0.70
  -7  -9  -2    7.20    1.10
  -7  -9  -2    6.50    1.00
   7   9   2    5.60    1.00
  -8  -9  -2    2.20    1.00
  -8  -9  -2    1.40    0.80
   8   9   2    1.10    0.90
   8   9   2    1.30    0.80
  -9  -9  -2   24.60    1.70
  -9  -9  -2   22.40    1.70
   9   9   2   20.40    1.60
 -10  -9  -2    8.90    1.20
 -10  -9  -2    8.50    1.40
  10   9   2    8.50    1.40
 -11  -9  -2    3.30    1.10
  11   9   2    2.60    1.20
 -12  -9  -2   13.10    1.60
  12   9   2   14.00    1.80
 -13  -9  -2   -0.10    1.30
  13   9   2    1.10    1.60
   5 -10  -2   17.50    2.30
   4 -10  -2    4.00    1.60
  -4  10   2    4.20    1.20
   3 -10  -2    1.10    1.40
  -3  10   2    0.80    1.00
   2 -10  -2    1.40    1.20
  -2  10   2    1.20    0.90
   1 -10  -2   -0.10    1.00
  -1  10   2    0.60    0.80
   0 -10  -2   23.90    2.00
   0  10   2   26.80    1.60
  -1 -10  -2   -0.10    0.80
   1  10   2   -0.10    0.70
  -2 -10  -2   10.60    1.40
   2  10   2   10.20    1.20
  -3 -10  -2   29.80    1.90
   3  10   2   30.40    1.60
  -4 -10  -2   63.09    2.70
   4  10   2   59.09    2.30
  -5 -10  -2   74.59    3.10
   5  10   2   76.49    2.80
  -6 -10  -2   -0.10    0.80
   6  10   2    0.20    0.70
  -7 -10  -2   23.60    1.80
   7  10   2   18.70    1.50
  -8 -10  -2   33.80    2.10
   8  10   2   38.70    2.10
  -9 -10  -2  140.39    4.90
 -10 -10  -2   29.10    2.30
 -10 -10  -2   32.60    2.20
 -11 -10  -2    1.30    1.10
 -12 -10  -2    3.30    1.40
   3 -11  -2    0.00    1.50
  -3  11   2   -0.20    1.20
   2 -11  -2    0.00    1.50
  -2  11   2   -0.30    1.00
   1 -11  -2    3.40    1.40
  -1  11   2    4.90    1.10
   0 -11  -2    2.90    1.20
   0  11   2    3.20    1.00
  -1 -11  -2   13.40    1.70
   1  11   2   16.00    1.50
  -2 -11  -2   18.00    1.70
  -3 -11  -2    0.00    1.00
   3  11   2    0.40    0.80
  -4 -11  -2   22.50    2.00
   4  11   2   22.30    1.60
  -5 -11  -2    0.20    1.00
   5  11   2    0.20    0.90
  -6 -11  -2  198.08    6.40
   6  11   2  196.38    6.00
  -7 -11  -2    0.50    1.00
   7  11   2    0.60    1.00
  -8 -11  -2   34.50    2.40
   8  11   2   34.90    2.10
  -9 -11  -2   -0.10    1.20
 -10 -11  -2    8.80    2.00
   1 -12  -2   13.90    2.10
  -1  12   2   15.80    1.80
   0 -12  -2    0.20    1.30
   0  12   2    0.00    1.10
  -1 -12  -2    1.90    1.30
   1  12   2    1.60    1.00
  -2 -12  -2    4.30    1.40
   2  12   2    7.60    1.20
  -3 -12  -2    0.10    1.30
   3  12   2   -0.10    1.00
  -4 -12  -2   22.30    2.10
   4  12   2   21.50    1.80
  -5 -12  -2    1.30    1.20
   5  12   2    0.90    1.00
  -6 -12  -2   12.00    1.70
   6  12   2   14.00    1.50
  -7 -12  -2   37.00    2.40
   7  12   2   38.50    2.20
  -8 -12  -2    3.30    1.50
   8  12   2    3.10    1.20
  -9 -12  -2    0.50    1.60
  -1 -13  -2    0.70    1.80
   1  13   2    1.60    1.20
  -2 -13  -2    2.30    1.60
   2  13   2    2.30    1.30
  -3 -13  -2    0.70    1.60
   3  13   2    0.80    1.20
  -4 -13  -2    4.40    1.60
   4  13   2    8.10    1.40
  -5 -13  -2    0.50    1.40
   5  13   2    0.00    1.20
  -6 -13  -2    0.70    1.40
   6  13   2    0.00    1.10
  -7 -13  -2    0.00    1.40
   7  13   2    1.00    1.30
  -8 -13  -2    0.70    1.60
   8  13   2    0.70    1.40
  -9 -13  -2    0.30    1.60
   9  13   2   -0.60    1.50
  -4 -14  -2    8.00    2.60
   4  14   2    7.50    1.70
  -5 -14  -2    0.40    1.80
   5  14   2    2.60    1.50
  -6 -14  -2    5.50    2.20
   6  14   2   10.40    1.70
  -7 -14  -2   10.40    2.30
   7  14   2    9.20    1.70
  -7 -13   3    0.40    1.60
  -6 -13   3   11.20    2.00
   5  13  -3   -0.20    1.40
  -5 -13   3   -0.70    1.20
  -5 -13   3   -0.10    1.70
   4  13  -3    7.10    1.20
  -4 -13   3    8.00    1.40
  -4 -13   3    8.40    2.00
  -4 -13   3   11.30    2.10
   3  13  -3   10.30    2.20
  -3 -13   3   12.40    2.20
  -3 -13   3   10.70    1.60
  -3 -13   3    6.90    2.00
   9  12  -3    0.70    1.20
  -9 -12   3    0.60    1.70
   8  12  -3    1.50    1.00
  -8 -12   3    1.50    1.40
   7  12  -3   19.40    1.70
  -7 -12   3   20.70    2.30
   6  12  -3    3.60    0.90
  -6 -12   3    5.10    1.20
  -6 -12   3    5.40    1.40
   5  12  -3   33.00    1.80
  -5 -12   3   36.20    2.00
  -5 -12   3   38.70    2.40
   4  12  -3    4.30    0.90
  -4 -12   3    3.70    1.10
  -4 -12   3    5.80    1.40
  -4 -12   3    4.30    1.60
   3  12  -3   10.50    1.10
   3  12  -3   12.70    1.90
  -3 -12   3   13.50    1.40
  -3 -12   3   12.60    1.80
  -3 -12   3   15.40    1.90
   2  12  -3   37.20    2.60
   2  12  -3   37.80    1.70
  -2 -12   3   41.80    2.80
  -2 -12   3   38.40    2.60
  -2 -12   3   36.30    2.20
   1  12  -3   17.90    2.20
   1  12  -3   18.10    1.30
  -1 -12   3   20.80    2.50
  -1 -12   3   20.40    2.40
  -1 -12   3   20.80    1.90
   0  12  -3    0.00    1.90
   0  12  -3    0.30    0.70
   0 -12   3    1.40    1.80
   0 -12   3    0.70    1.70
   0 -12   3    0.70    1.20
  10  11  -3   10.50    1.50
 -10 -11   3   10.70    1.90
   9  11  -3   -0.20    1.00
  -9 -11   3    0.30    1.30
   8  11  -3   16.80    1.50
  -8 -11   3   19.20    2.10
   7  11  -3    2.70    0.90
  -7 -11   3    4.90    1.10
  -7 -11   3    5.00    1.40
   6  11  -3    0.30    0.80
  -6 -11   3    0.30    0.90
  -6 -11   3    0.00    1.00
   5  11  -3   13.50    1.20
  -5 -11   3   17.30    1.50
  -5 -11   3   15.80    1.70
   4  11  -3   13.40    1.10
  -4 -11   3   16.40    1.70
  -4 -11   3   16.10    1.90
  -4 -11   3   20.10    1.40
   3  11  -3   12.80    1.70
   3  11  -3   10.30    1.00
  -3 -11   3   12.70    1.20
  -3 -11   3   10.60    1.50
  -3 -11   3   12.90    1.60
   2  11  -3    0.70    0.60
   2  11  -3    0.80    1.10
  -2 -11   3    0.80    0.80
  -2 -11   3    1.00    1.10
  -2 -11   3    1.60    1.40
   1  11  -3    3.30    0.70
   1  11  -3    3.30    1.50
  -1 -11   3    3.70    1.60
  -1 -11   3    2.50    1.40
  -1 -11   3    2.50    0.90
   0  11  -3    3.80    0.70
   0  11  -3    3.30    1.40
   0 -11   3    6.50    1.40
   0 -11   3    6.20    1.60
   0 -11   3    5.10    1.10
  -1  11  -3    6.20    1.70
  -1  11  -3    6.80    0.70
   1 -11   3    6.20    1.10
   1 -11   3    6.80    1.80
  -2  11  -3   12.30    1.00
  -2  11  -3   10.50    1.90
   2 -11   3   14.80    2.20
   2 -11   3   14.60    1.50
  11  10  -3    2.90    1.40
 -11 -10   3    5.90    1.60
  10  10  -3    3.70    1.20
 -10 -10   3    3.20    1.50
   9  10  -3    2.30    1.00
  -9 -10   3    1.80    1.20
   8  10  -3    0.00    0.80
  -8 -10   3   -0.10    1.00
  -8 -10   3   -0.20    0.90
   7  10  -3  104.19    3.50
  -7 -10   3  108.79    3.60
  -7 -10   3  103.19    3.80
   6  10  -3    1.80    0.70
  -6 -10   3    1.10    0.80
  -6 -10   3    2.10    1.00
   5  10  -3   25.10    1.40
  -5 -10   3   25.90    2.00
  -5 -10   3   24.80    1.50
  -5 -10   3   23.20    1.70
   4  10  -3   14.00    1.00
  -4 -10   3   14.70    1.50
  -4 -10   3   16.30    1.70
  -4 -10   3   14.10    1.20
   3  10  -3    1.50    0.60
   3  10  -3    0.60    1.10
  -3 -10   3    1.40    0.70
  -3 -10   3    2.20    1.10
  -3 -10   3    1.00    1.10
   2  10  -3    5.20    0.70
   2  10  -3    6.00    1.20
  -2 -10   3    5.40    1.20
  -2 -10   3    6.50    1.20
  -2 -10   3    6.00    0.90
   1  10  -3    0.40    0.50
   1  10  -3    0.70    1.00
  -1 -10   3    0.30    1.00
  -1 -10   3    0.00    0.90
  -1 -10   3    1.10    0.70
   0  10  -3   77.69    2.60
   0  10  -3   82.69    3.40
   0 -10   3   77.79    2.80
   0 -10   3   92.49    3.70
  -1  10  -3   11.50    1.50
  -1  10  -3   11.60    0.90
   1 -10   3   10.40    1.80
   1 -10   3   10.00    1.10
  -2  10  -3    0.70    0.50
  -2  10  -3    0.50    1.30
   2 -10   3    1.60    1.40
   2 -10   3    1.50    0.80
  -3  10  -3    5.70    1.80
  -3  10  -3    4.00    0.60
   3 -10   3    3.20    1.60
   3 -10   3    5.00    1.10
  -4  10  -3   13.60    2.10
   4 -10   3   13.30    1.50
  12   9  -3    1.20    1.40
 -12  -9   3    1.50    1.70
  11   9  -3   -0.10    1.10
 -11  -9   3    0.30    1.30
  10   9  -3    4.90    1.20
 -10  -9   3    3.50    1.30
   9   9  -3   25.40    1.60
  -9  -9   3   27.80    1.90
   8   9  -3    2.20    0.80
  -8  -9   3    1.90    1.00
  -8  -9   3    3.30    0.90
   7   9  -3   29.80    1.60
  -7  -9   3   30.40    1.80
  -7  -9   3   30.20    1.60
   6   9  -3   70.49    2.50
  -6  -9   3   66.39    2.80
  -6  -9   3   73.49    2.60
   5   9  -3    1.70    0.60
  -5  -9   3    2.60    1.00
  -5  -9   3    1.50    0.60
  -5  -9   3    2.20    0.90
   4   9  -3   32.70    1.40
  -4  -9   3   31.10    1.50
  -4  -9   3   36.30    1.80
  -4  -9   3   28.30    1.70
   3   9  -3   11.50    1.30
   3   9  -3   12.30    0.90
  -3  -9   3   11.50    1.00
  -3  -9   3   11.70    1.30
  -3  -9   3   13.30    1.30
   2   9  -3   95.29    3.50
   2   9  -3   95.29    3.00
  -2  -9   3   97.19    3.50
  -2  -9   3   94.39    3.10
  -2  -9   3  102.09    3.70
   1   9  -3  208.38    6.40
   1   9  -3  201.88    5.80
  -1  -9   3  205.58    6.00
  -1  -9   3  209.98    6.60
  -1  -9   3  209.08    6.30
   0   9  -3    1.30    1.00
   0   9  -3    2.40    0.50
   0  -9   3    2.40    0.70
   0  -9   3    2.20    1.00
  -1   9  -3   10.70    1.40
  -1   9  -3   11.50    0.80
   1  -9   3   13.60    1.80
   1  -9   3    9.60    1.00
  -2   9  -3    0.90    1.20
  -2   9  -3    1.00    0.50
   2  -9   3    1.00    1.20
   2  -9   3    1.50    0.70
  -3   9  -3    5.70    1.40
  -3   9  -3    5.80    0.60
   3  -9   3    6.60    1.60
   3  -9   3    5.80    0.90
  -4   9  -3    0.20    1.30
  -4   9  -3    0.40    0.50
   4  -9   3    0.20    1.50
   4  -9   3   -0.60    0.80
  -5   9  -3   13.70    2.00
  -5   9  -3   15.10    0.90
   5  -9   3   13.70    1.40
   5  -9   3   11.30    2.20
  12   8  -3    0.00    1.30
  12   8  -3    0.50    1.60
 -12  -8   3    0.60    1.40
  11   8  -3   12.60    1.70
  11   8  -3   14.10    1.60
 -11  -8   3   12.70    1.60
  10   8  -3   94.69    3.30
 -10  -8   3   80.19    3.50
   9   8  -3    2.60    0.90
  -9  -8   3    3.40    1.00
   8   8  -3   57.39    2.30
  -8  -8   3   60.79    2.30
  -8  -8   3   55.19    2.50
   7   8  -3   12.30    1.10
  -7  -8   3   12.90    1.10
  -7  -8   3   11.20    1.20
   6   8  -3   54.89    2.00
  -6  -8   3   53.79    2.00
  -6  -8   3   55.39    2.30
   5   8  -3    8.80    0.90
  -5  -8   3    8.80    1.10
  -5  -8   3    8.30    1.00
  -5  -8   3    8.20    0.90
   4   8  -3   85.79    2.70
  -4  -8   3   86.99    3.00
  -4  -8   3   83.89    3.00
  -4  -8   3   81.99    2.70
   3   8  -3    5.20    0.90
   3   8  -3    5.30    0.60
  -3  -8   3    4.70    0.90
  -3  -8   3    4.90    1.00
  -3  -8   3    5.90    0.70
   2   8  -3  753.82   20.20
   2   8  -3  761.92   20.70
  -2  -8   3  751.12   20.30
  -2  -8   3  760.12   20.70
  -2  -8   3  777.82   20.70
   1   8  -3  279.97    8.20
   1   8  -3  278.87    7.70
  -1  -8   3  285.57    8.10
  -1  -8   3  286.57    7.80
  -1  -8   3  273.57    8.30
   0   8  -3    1.60    0.40
   0   8  -3    1.20    0.80
   0  -8   3    1.50    0.80
   0  -8   3    1.00    0.50
  -1   8  -3    4.30    1.10
  -1   8  -3    4.50    0.50
   1  -8   3    5.10    0.70
   1  -8   3    3.30    1.00
  -2   8  -3    2.30    0.50
  -2   8  -3    2.80    1.00
   2  -8   3    2.20    0.60
   2  -8   3    2.90    1.00
  -3   8  -3   65.59    2.90
  -3   8  -3   66.29    2.10
   3  -8   3   66.09    3.00
   3  -8   3   62.59    2.40
  -4   8  -3   18.00    1.80
  -4   8  -3   20.20    1.00
   4  -8   3   20.30    1.30
   4  -8   3   19.60    2.00
  -5   8  -3    0.40    0.50
  -5   8  -3    0.30    1.30
   5  -8   3    0.00    1.40
   5  -8   3   -0.10    0.80
  -6   8  -3    2.20    0.60
  -6   8  -3    1.00    1.50
   6  -8   3    1.30    1.00
   6  -8   3    2.40    1.80
  12   7  -3    2.00    1.50
  12   7  -3    0.30    1.30
 -12  -7   3    1.70    1.30
  11   7  -3   39.00    2.40
  11   7  -3   42.00    2.40
 -11  -7   3   43.80    2.60
  10   7  -3   67.69    2.90
  10   7  -3   62.59    2.70
 -10  -7   3   66.39    2.90
   9   7  -3   16.00    1.60
   9   7  -3   15.50    1.40
  -9  -7   3   15.30    1.40
   8   7  -3    3.00    0.90
   8   7  -3    3.70    0.80
  -8  -7   3    3.70    0.90
  -8  -7   3    3.10    0.80
   7   7  -3    5.50    0.70
   7   7  -3    4.90    0.90
  -7  -7   3    5.70    0.90
  -7  -7   3    6.30    0.80
   6   7  -3   20.00    1.10
  -6  -7   3   18.70    1.30
  -6  -7   3   19.90    1.10
   5   7  -3   -0.10    0.40
  -5  -7   3   -0.10    0.60
  -5  -7   3    0.00    0.50
  -5  -7   3    0.10    0.60
   4   7  -3    3.30    0.50
  -4  -7   3    4.20    0.50
  -4  -7   3    2.60    0.70
  -4  -7   3    4.20    0.70
   3   7  -3   24.30    1.40
   3   7  -3   23.10    1.00
  -3  -7   3   27.90    1.10
  -3  -7   3   22.90    1.30
  -3  -7   3   25.50    1.40
   2   7  -3   31.20    1.50
   2   7  -3   27.90    1.10
  -2  -7   3   27.40    1.40
  -2  -7   3   26.60    1.20
  -2  -7   3   28.20    1.50
   1   7  -3   14.30    0.80
   1   7  -3   16.30    1.10
  -1  -7   3   14.40    1.20
  -1  -7   3   14.10    0.80
   0   7  -3    9.10    1.00
   0   7  -3    8.10    0.60
   0  -7   3    9.30    1.20
   0  -7   3    9.00    0.70
  -1   7  -3   18.80    1.40
  -1   7  -3   20.40    0.90
   1  -7   3   20.40    1.60
  -2   7  -3    8.60    1.10
  -2   7  -3    8.80    0.70
   2  -7   3    9.50    1.30
   2  -7   3    8.60    0.80
  -3   7  -3   38.20    1.30
  -3   7  -3   37.20    2.10
   3  -7   3   36.70    1.60
   3  -7   3   40.50    2.20
  -4   7  -3   69.39    2.10
  -4   7  -3   73.79    3.00
   4  -7   3   71.49    3.10
   4  -7   3   65.19    2.40
  -5   7  -3    2.80    1.10
  -5   7  -3    4.50    0.60
   5  -7   3    3.60    1.30
   5  -7   3    2.90    0.80
  -6   7  -3   28.10    1.20
  -6   7  -3   28.80    2.40
   6  -7   3   26.80    1.60
   6  -7   3   26.10    2.30
  -7   7  -3    0.20    0.60
  -7   7  -3    0.50    1.60
   7  -7   3    0.20    0.90
   7  -7   3    0.20    1.70
  13   6  -3    7.20    2.10
  12   6  -3   -0.90    1.30
  12   6  -3    0.80    1.60
 -12  -6   3    0.10    1.20
  11   6  -3    7.90    1.40
  11   6  -3    6.90    1.30
 -11  -6   3    6.00    1.30
  10   6  -3   22.40    1.60
  10   6  -3   21.00    1.70
 -10  -6   3   22.60    1.70
   9   6  -3   10.80    1.20
   9   6  -3   10.20    1.30
  -9  -6   3   10.50    1.30
   8   6  -3   31.20    1.70
   8   6  -3   31.50    1.60
  -8  -6   3   30.60    1.50
  -8  -6   3   29.70    1.70
   7   6  -3   24.50    1.40
   7   6  -3   25.60    1.30
  -7  -6   3   22.50    1.40
  -7  -6   3   22.60    1.20
   6   6  -3   49.50    1.90
   6   6  -3   48.10    1.80
  -6  -6   3   49.90    2.00
  -6  -6   3   46.50    1.80
   5   6  -3    7.40    0.80
   5   6  -3    9.10    0.80
  -5  -6   3    7.90    0.90
  -5  -6   3    7.00    0.90
  -5  -6   3    7.90    0.70
   4   6  -3    1.70    0.50
   4   6  -3    1.00    0.40
  -4  -6   3    1.70    0.50
  -4  -6   3    0.90    0.50
  -4  -6   3    2.00    0.40
   3   6  -3  311.67    8.80
   3   6  -3  316.67    8.50
  -3  -6   3  310.67    8.50
  -3  -6   3  312.47    8.80
  -3  -6   3  321.27    8.80
   2   6  -3   65.79    2.00
   2   6  -3   65.09    2.40
  -2  -6   3   68.89    2.40
  -2  -6   3   66.99    2.40
  -2  -6   3   73.09    2.10
   1   6  -3   10.80    0.60
   1   6  -3    9.10    0.90
  -1  -6   3   11.40    0.70
  -1  -6   3   10.10    0.90
   0   6  -3   47.90    2.00
   0   6  -3   54.49    1.60
   0  -6   3   53.49    1.70
   0  -6   3   51.19    2.10
  -1   6  -3   10.40    1.00
  -1   6  -3   12.30    0.60
   1  -6   3   11.30    0.70
   1  -6   3   12.40    1.10
  -2   6  -3  137.09    3.80
  -2   6  -3  131.99    4.30
   2  -6   3  137.09    4.40
   2  -6   3  136.19    3.90
  -3   6  -3   23.30    1.50
  -3   6  -3   25.70    1.00
   3  -6   3   25.10    1.20
   3  -6   3   25.20    1.60
  -4   6  -3   39.90    1.40
  -4   6  -3   39.30    2.00
   4  -6   3   38.40    1.60
   4  -6   3   40.30    2.10
  -5   6  -3    3.70    1.00
  -5   6  -3    3.20    0.50
   5  -6   3    3.90    0.70
   5  -6   3    2.00    1.00
  -6   6  -3   29.30    1.20
  -6   6  -3   30.90    2.00
   6  -6   3   29.90    1.60
   6  -6   3   28.90    2.30
  -7   6  -3   63.99    3.20
  -7   6  -3   61.59    2.00
   7  -6   3   58.69    2.50
   7  -6   3   60.79    3.30
  -8   6  -3    0.20    0.60
  -8   6  -3   -0.10    1.60
   8  -6   3    0.40    1.50
   8  -6   3    0.10    1.00
  13   5  -3    2.80    2.00
  12   5  -3    4.80    1.60
  12   5  -3    5.40    1.70
 -12  -5   3    3.50    1.40
  11   5  -3   30.00    2.10
  11   5  -3   29.30    2.10
 -11  -5   3   26.50    2.00
  10   5  -3   44.00    2.20
  10   5  -3   38.70    2.20
 -10  -5   3   44.50    2.20
   9   5  -3   19.70    1.50
   9   5  -3   20.20    1.50
  -9  -5   3   21.10    1.50
   8   5  -3   28.80    1.60
   8   5  -3   27.20    1.50
  -8  -5   3   30.50    1.60
  -8  -5   3   29.50    1.40
   7   5  -3   51.39    2.10
   7   5  -3   54.09    2.00
  -7  -5   3   54.19    2.10
  -7  -5   3   48.00    1.90
   6   5  -3    5.50    0.60
   6   5  -3    8.10    0.90
  -6  -5   3    7.80    0.90
  -6  -5   3    7.50    0.70
   5   5  -3   60.39    2.00
   5   5  -3   60.89    2.10
  -5  -5   3   59.79    2.20
  -5  -5   3   60.49    2.00
  -5  -5   3   61.29    2.00
   4   5  -3   21.90    1.00
   4   5  -3   20.40    0.90
  -4  -5   3   18.80    1.10
  -4  -5   3   20.60    1.00
  -4  -5   3   19.90    0.90
   3   5  -3   62.29    1.90
   3   5  -3   66.99    2.00
   3   5  -3   65.19    2.00
  -3  -5   3   60.89    2.10
  -3  -5   3   61.79    2.20
  -3  -5   3   60.79    1.90
   2   5  -3    3.40    0.40
   2   5  -3    3.60    0.40
   2   5  -3    2.90    0.60
   2   5  -3    3.10    0.40
  -2  -5   3    2.80    0.50
  -2  -5   3    2.50    0.50
  -2  -5   3    2.50    0.30
   1   5  -3   18.40    0.70
   1   5  -3   17.60    0.70
   1   5  -3   16.20    1.00
  -1  -5   3   17.10    0.70
  -1  -5   3   14.20    0.90
   0   5  -3   55.29    1.60
   0   5  -3   49.30    1.90
   0   5  -3   57.79    1.60
   0  -5   3   48.50    2.00
   0  -5   3   53.19    1.70
  -1   5  -3   30.30    1.00
  -1   5  -3   27.40    1.40
  -1   5  -3   29.90    1.00
   1  -5   3   27.10    1.00
   1  -5   3   26.40    1.40
  -2   5  -3    0.20    0.30
  -2   5  -3    0.40    0.50
  -2   5  -3    0.40    0.30
   2  -5   3    0.40    0.30
   2  -5   3    0.80    0.60
  -3   5  -3   10.70    0.60
  -3   5  -3   10.60    1.00
   3  -5   3    9.30    1.10
   3  -5   3   10.70    0.70
  -4   5  -3    0.20    0.70
  -4   5  -3    0.00    0.30
   4  -5   3    0.40    0.40
   4  -5   3    1.10    0.80
  -5   5  -3    1.50    0.40
  -5   5  -3    1.40    0.90
   5  -5   3    1.30    0.90
   5  -5   3    1.20    0.50
  -6   5  -3    0.70    0.40
  -6   5  -3   -0.10    0.90
   6  -5   3    0.60    0.60
   6  -5   3    0.90    1.10
  -7   5  -3    0.60    1.10
  -7   5  -3   -0.20    0.50
   7  -5   3    0.40    1.10
   7  -5   3   -0.30    0.60
  -8   5  -3   11.50    1.80
  -8   5  -3   10.40    0.90
   8  -5   3   10.60    1.70
   8  -5   3   10.20    1.20
  -9   5  -3    1.10    1.50
  -9   5  -3    1.50    0.70
   9  -5   3    2.30    1.80
   9  -5   3    1.60    1.10
  12   4  -3   -0.10    1.40
 -12  -4   3    0.10    1.20
  11   4  -3    0.60    1.10
  11   4  -3    0.70    1.20
 -11  -4   3    0.30    1.00
  10   4  -3    8.00    1.20
  10   4  -3    6.10    1.20
 -10  -4   3    5.80    1.10
   9   4  -3    4.80    1.10
   9   4  -3    5.00    0.90
  -9  -4   3    4.50    1.00
   8   4  -3  209.58    6.30
   8   4  -3  203.68    6.10
  -8  -4   3  206.58    6.00
  -8  -4   3  210.98    6.20
   7   4  -3    2.60    0.70
   7   4  -3    2.70    0.60
  -7  -4   3    2.70    0.70
  -7  -4   3    2.80    0.60
   6   4  -3   23.70    1.20
   6   4  -3   28.90    1.40
  -6  -4   3   26.20    1.10
  -6  -4   3   26.70    1.30
   5   4  -3    0.60    0.40
   5   4  -3    0.60    0.50
  -5  -4   3    0.60    0.30
  -5  -4   3    0.60    0.30
  -5  -4   3    0.70    0.50
  -5  -4   3    0.90    0.50
   4   4  -3  319.27    8.70
   4   4  -3  318.27    8.80
  -4  -4   3  318.17    8.90
  -4  -4   3  331.67    8.70
  -4  -4   3  341.07    8.80
  -4  -4   3  312.87    8.70
   3   4  -3   39.60    1.30
   3   4  -3   41.90    1.40
   3   4  -3   40.10    1.40
  -3  -4   3   40.90    1.30
  -3  -4   3   40.40    1.50
  -3  -4   3   39.30    1.40
   2   4  -3    2.30    0.50
   2   4  -3    2.60    0.30
   2   4  -3    3.00    0.40
   2   4  -3    2.20    0.30
  -2  -4   3    2.30    0.40
  -2  -4   3    1.90    0.30
  -2  -4   3    2.20    0.40
   1   4  -3    7.00    0.40
   1   4  -3    6.90    0.40
   1   4  -3    6.60    0.40
   1   4  -3    6.10    0.60
  -1  -4   3    7.20    0.60
  -1  -4   3    6.10    0.50
  -1  -4   3    6.30    0.60
  -1  -4   3    6.50    0.40
   0   4  -3  623.84   16.60
   0   4  -3  613.84   16.90
   0   4  -3  648.34   16.60
   0  -4   3  646.44   16.70
   0  -4   3  646.84   16.60
   0  -4   3  633.94   17.00
   0  -4   3  607.34   16.60
  -1   4  -3  201.48    5.40
  -1   4  -3  200.28    5.80
  -1   4  -3  211.78    5.40
   1  -4   3  205.88    5.50
   1  -4   3  197.88    5.50
   1  -4   3  186.38    5.80
   1  -4   3  203.98    5.40
  -2   4  -3  109.79    3.60
  -2   4  -3  112.99    3.10
  -2   4  -3  117.09    3.10
   2  -4   3  111.79    3.20
   2  -4   3  112.29    3.20
   2  -4   3  113.79    3.60
  -3   4  -3    1.30    0.30
  -3   4  -3    1.40    0.30
  -3   4  -3    1.00    0.60
   3  -4   3    0.80    0.60
   3  -4   3    1.10    0.40
   3  -4   3    1.10    0.30
  -4   4  -3  183.28    5.00
  -4   4  -3  190.18    5.60
   4  -4   3  185.58    5.20
   4  -4   3  179.48    5.60
  -5   4  -3  165.38    4.70
  -5   4  -3  168.38    5.20
   5  -4   3  167.28    5.40
   5  -4   3  173.48    4.80
  -6   4  -3   22.40    1.60
  -6   4  -3   22.60    1.00
   6  -4   3   24.20    1.70
   6  -4   3   22.30    1.20
  -7   4  -3   39.00    2.10
  -7   4  -3   31.80    1.30
   7  -4   3   36.30    1.60
   7  -4   3   33.80    2.10
  -8   4  -3    2.40    0.60
  -8   4  -3    2.40    1.10
   8  -4   3    2.20    1.20
   8  -4   3    1.90    0.80
  -9   4  -3    5.40    1.40
  -9   4  -3    6.10    0.80
   9  -4   3    8.50    1.70
   9  -4   3    8.40    1.20
 -10   4  -3    1.10    0.80
  10  -4   3    0.50    1.10
  10  -4   3    0.10    1.90
  12   3  -3    0.00    1.50
 -12  -3   3    0.00    1.30
  11   3  -3    0.30    1.30
 -11  -3   3    0.00    1.00
  10   3  -3    5.40    1.20
  10   3  -3    5.10    1.20
 -10  -3   3    4.10    1.00
   9   3  -3   88.89    3.30
   9   3  -3   91.79    3.20
  -9  -3   3   88.69    3.30
   8   3  -3   85.29    2.90
   8   3  -3   88.29    3.20
  -8  -3   3   92.09    2.90
  -8  -3   3   82.09    3.00
   7   3  -3  141.29    4.40
   7   3  -3  136.09    4.20
  -7  -3   3  139.49    4.10
  -7  -3   3  133.29    4.30
  -7  -3   3  148.99    4.50
   6   3  -3    0.30    0.60
   6   3  -3    0.50    0.40
  -6  -3   3    0.20    0.30
  -6  -3   3    0.10    0.50
  -6  -3   3    0.30    0.50
   5   3  -3   13.90    0.90
   5   3  -3   13.70    0.90
   5   3  -3   12.30    0.80
  -5  -3   3   13.80    0.70
  -5  -3   3   12.70    0.90
  -5  -3   3   13.50    0.90
  -5  -3   3   13.30    0.70
   4   3  -3  103.99    3.20
   4   3  -3  113.39    3.30
  -4  -3   3  106.19    3.10
  -4  -3   3  109.59    3.30
  -4  -3   3  112.39    3.10
  -4  -3   3  113.99    3.20
   3   3  -3  224.48    6.20
   3   3  -3  223.78    6.30
   3   3  -3  243.78    6.30
  -3  -3   3  219.38    6.20
  -3  -3   3  228.08    6.20
  -3  -3   3  230.28    6.40
   2   3  -3    3.90    0.40
   2   3  -3    4.50    0.40
   2   3  -3    3.60    0.30
  -2  -3   3    3.40    0.40
  -2  -3   3    3.50    0.50
  -2  -3   3    3.20    0.30
   1   3  -3  196.38    5.50
   1   3  -3  196.88    5.30
   1   3  -3  203.48    5.20
   1   3  -3  198.68    5.20
  -1  -3   3  194.28    5.20
  -1  -3   3  196.08    5.40
  -1  -3   3  186.48    5.20
  -1  -3   3  191.38    5.50
   0   3  -3  281.37    7.80
   0   3  -3  290.87    7.50
   0  -3   3  281.67    7.50
   0  -3   3  285.07    7.80
   0  -3   3  276.97    7.50
  -1   3  -3 1237.68   33.00
   1  -3   3 1238.48   33.00
   1  -3   3 1220.38   32.70
   1  -3   3 1281.97   32.70
   1  -3   3 1262.07   32.70
  -2   3  -3   19.80    0.60
  -2   3  -3   19.50    1.00
  -2   3  -3   19.70    0.60
   2  -3   3   17.30    0.70
   2  -3   3   17.10    0.70
   2  -3   3   18.40    0.80
   2  -3   3   15.90    1.00
  -3   3  -3  244.78    7.00
  -3   3  -3  243.48    6.60
  -3   3  -3  258.67    6.60
   3  -3   3  251.07    6.80
   3  -3   3  246.78    6.70
   3  -3   3  239.38    7.10
  -4   3  -3    5.70    0.50
  -4   3  -3    4.50    0.70
  -4   3  -3    4.90    0.80
  -4   3  -3    4.90    0.40
   4  -3   3    5.30    0.80
   4  -3   3    5.10    0.70
   4  -3   3    5.40    0.50
  -5   3  -3   68.99    2.10
  -5   3  -3   71.89    2.70
  -5   3  -3   67.39    2.60
   5  -3   3   66.89    2.30
   5  -3   3   68.79    2.20
   5  -3   3   71.29    2.70
  -6   3  -3  411.46   11.00
  -6   3  -3  403.36   11.50
   6  -3   3  411.96   11.30
   6  -3   3  404.66   11.10
   6  -3   3  412.66   11.70
  -7   3  -3    9.80    1.30
  -7   3  -3   11.10    0.80
   7  -3   3    9.70    1.10
   7  -3   3    9.00    0.90
   7  -3   3    9.00    1.30
  -8   3  -3    8.00    0.80
  -8   3  -3    9.00    1.30
   8  -3   3    9.20    1.00
   8  -3   3    8.60    1.40
  -9   3  -3    1.40    1.10
  -9   3  -3    1.40    0.60
   9  -3   3    2.60    1.30
   9  -3   3    1.70    0.80
 -10   3  -3   62.99    2.30
 -10   3  -3   61.09    3.20
  10  -3   3   67.79    2.80
  10  -3   3   67.09    3.40
  12   2  -3   -0.10    1.50
 -12  -2   3    1.40    1.40
  11   2  -3   74.39    3.30
 -11  -2   3   71.29    3.20
  10   2  -3   16.20    1.60
  10   2  -3   13.00    1.60
 -10  -2   3   17.90    1.50
   9   2  -3   45.80    2.00
   9   2  -3   45.20    2.20
  -9  -2   3   46.00    2.10
   8   2  -3  759.82   20.60
   8   2  -3  748.23   20.30
  -8  -2   3  765.42   20.30
  -8  -2   3  741.53   20.50
   7   2  -3   32.40    1.50
   7   2  -3   31.90    1.60
  -7  -2   3   38.00    1.50
  -7  -2   3   32.30    1.50
  -7  -2   3   37.60    1.60
   6   2  -3  425.16   11.70
   6   2  -3  426.26   11.90
  -6  -2   3  414.26   11.90
  -6  -2   3  446.16   11.70
  -6  -2   3  449.46   11.80
   5   2  -3   31.50    1.20
   5   2  -3   29.20    1.30
   5   2  -3   30.40    1.20
  -5  -2   3   27.60    1.30
  -5  -2   3   29.90    1.10
  -5  -2   3   30.60    1.20
  -5  -2   3   30.30    1.00
   4   2  -3   53.29    1.80
   4   2  -3   59.29    1.90
  -4  -2   3   57.59    1.80
  -4  -2   3   55.39    1.90
  -4  -2   3   57.99    1.60
  -4  -2   3   56.09    1.70
   3   2  -3  182.08    5.10
   3   2  -3  178.78    5.00
  -3  -2   3  175.38    4.90
  -3  -2   3  190.68    4.80
  -3  -2   3  179.18    5.10
   2   2  -3    0.10    0.20
   2   2  -3    0.10    0.20
   2   2  -3    0.20    0.30
  -2  -2   3    0.10    0.10
  -2  -2   3    0.40    0.30
  -2  -2   3    0.10    0.20
   1   2  -3  173.48    4.70
   1   2  -3  168.28    4.80
   1   2  -3  176.68    4.50
   1   2  -3  172.48    4.50
  -1  -2   3  172.08    4.60
  -1  -2   3  168.58    4.80
  -1  -2   3  169.68    4.60
  -1  -2   3  177.78    4.70
   0   2  -3  201.08    5.20
   0   2  -3  192.98    5.40
   0  -2   3  193.08    5.10
   0  -2   3  188.78    5.10
   0  -2   3  192.38    5.30
  -1   2  -3  477.55   12.80
  -1   2  -3  467.95   12.80
  -1   2  -3  476.45   12.60
   1  -2   3  483.25   12.60
   1  -2   3  464.15   12.80
   1  -2   3  489.65   12.50
   1  -2   3  475.45   12.50
  -2   2  -3  139.79    4.10
  -2   2  -3  136.19    4.00
   2  -2   3  134.99    4.10
   2  -2   3  138.49    3.90
   2  -2   3  135.19    3.70
   2  -2   3  145.99    3.70
  -3   2  -3   68.29    1.70
  -3   2  -3   63.89    2.30
  -3   2  -3   64.09    2.10
  -3   2  -3   63.09    1.70
   3  -2   3   61.29    2.20
   3  -2   3   64.99    1.90
   3  -2   3   60.99    2.00
   3  -2   3   60.19    1.80
  -4   2  -3   96.99    2.60
  -4   2  -3   92.19    2.60
  -4   2  -3   90.39    3.00
  -4   2  -3   88.59    3.10
   4  -2   3   93.39    2.80
   4  -2   3   89.39    3.10
   4  -2   3   96.19    2.70
  -5   2  -3   35.30    1.60
  -5   2  -3   36.90    1.20
  -5   2  -3   32.70    1.70
   5  -2   3   32.30    1.40
   5  -2   3   34.50    1.30
   5  -2   3   38.50    1.70
  -6   2  -3    0.40    0.30
  -6   2  -3    0.30    0.70
  -6   2  -3    0.30    0.60
   6  -2   3    0.00    0.60
   6  -2   3   -0.20    0.40
   6  -2   3   -0.10    0.50
  -7   2  -3   86.19    3.40
  -7   2  -3   85.49    2.60
  -7   2  -3   88.89    3.20
   7  -2   3   86.59    3.00
   7  -2   3   85.89    2.80
   7  -2   3   87.39    3.30
  -8   2  -3    0.60    1.00
  -8   2  -3   -0.20    0.40
  -8   2  -3   -0.40    0.80
   8  -2   3   -0.20    0.90
   8  -2   3    0.40    0.90
   8  -2   3    0.40    0.60
  -9   2  -3    0.70    0.90
  -9   2  -3    0.20    0.50
  -9   2  -3    0.30    1.10
   9  -2   3    0.20    0.70
   9  -2   3    1.00    1.00
   9  -2   3   -0.30    1.00
 -10   2  -3   14.10    1.80
 -10   2  -3   12.10    1.10
  10  -2   3   13.20    1.70
  10  -2   3   14.00    1.40
  10  -2   3   12.80    1.90
 -11   2  -3    8.10    1.00
 -11   2  -3    7.20    1.80
  11  -2   3    8.60    2.00
  11  -2   3    7.80    1.30
  12   1  -3    7.80    1.80
 -12  -1   3    7.60    1.70
  11   1  -3    0.40    1.30
 -11  -1   3   -0.20    1.10
  10   1  -3   13.60    1.60
 -10  -1   3   16.30    1.60
   9   1  -3   17.00    1.50
   9   1  -3   15.80    1.50
  -9  -1   3   20.70    1.50
  -9  -1   3   16.80    1.40
   8   1  -3    1.80    0.90
   8   1  -3    2.50    0.80
  -8  -1   3    2.30    0.70
  -8  -1   3    1.70    0.70
   7   1  -3   49.50    2.10
   7   1  -3   43.20    1.80
  -7  -1   3   50.09    2.00
  -7  -1   3   48.60    1.90
  -7  -1   3   48.30    1.80
   6   1  -3   -0.20    0.80
   6   1  -3    0.10    0.40
   6   1  -3    0.30    0.50
  -6  -1   3    0.40    0.50
  -6  -1   3    0.00    0.40
  -6  -1   3    0.30    0.50
   5   1  -3    0.40    0.30
   5   1  -3    0.10    0.40
   5   1  -3    0.20    0.40
   5   1  -3    0.20    0.40
  -5  -1   3    0.20    0.40
  -5  -1   3    0.00    0.40
  -5  -1   3    0.40    0.30
   4   1  -3   40.50    1.20
   4   1  -3   37.90    1.40
   4   1  -3   37.80    1.50
   4   1  -3   41.80    1.30
  -4  -1   3   39.40    1.50
  -4  -1   3   40.10    1.40
  -4  -1   3   38.20    1.30
   3   1  -3   58.19    1.80
   3   1  -3   59.79    1.90
  -3  -1   3   60.19    1.80
  -3  -1   3   59.09    1.90
  -3  -1   3   57.59    1.70
   2   1  -3  540.75   14.40
   2   1  -3  550.74   14.50
   2   1  -3  535.65   14.30
  -2  -1   3  547.85   14.40
  -2  -1   3  542.35   14.30
   1   1  -3    0.70    0.20
   1   1  -3    0.70    0.10
   1   1  -3    1.00    0.30
   1   1  -3    0.70    0.10
  -1  -1   3    0.80    0.10
  -1  -1   3    0.50    0.20
  -1  -1   3    0.60    0.20
  -1  -1   3    0.60    0.10
   0   1  -3   90.79    2.60
   0   1  -3   92.09    2.60
   0   1  -3   91.29    2.60
   0  -1   3   91.49    2.60
  -1   1  -3    3.40    0.40
  -1   1  -3    3.20    0.40
  -1   1  -3    2.90    0.30
  -2   1  -3    0.30    0.30
  -2   1  -3    0.10    0.30
   2  -1   3    0.40    0.20
   2  -1   3    1.00    0.10
   2  -1   3    0.30    0.10
  -3   1  -3  292.97    8.00
  -3   1  -3  289.87    8.10
   3  -1   3  295.17    7.90
   3  -1   3  297.07    7.70
   3  -1   3  277.97    7.70
  -4   1  -3   63.29    2.10
  -4   1  -3   62.49    2.30
  -4   1  -3   69.09    1.80
  -4   1  -3   64.89    1.80
   4  -1   3   65.49    1.90
   4  -1   3   60.69    1.90
   4  -1   3   63.99    2.10
   4  -1   3   64.79    2.20
  -5   1  -3    0.30    0.50
  -5   1  -3    0.30    0.20
  -5   1  -3    0.20    0.50
  -5   1  -3    0.20    0.30
   5  -1   3    0.40    0.50
   5  -1   3    0.10    0.50
   5  -1   3    0.40    0.30
  -6   1  -3  384.56   10.20
  -6   1  -3  374.66   10.70
  -6   1  -3  376.86   10.60
   6  -1   3  384.66   10.70
   6  -1   3  384.16   10.50
   6  -1   3  378.96   10.30
  -7   1  -3   54.79    1.80
  -7   1  -3   49.00    2.20
  -7   1  -3   53.89    2.30
   7  -1   3   53.49    2.30
   7  -1   3   55.79    2.10
   7  -1   3   52.89    1.90
  -8   1  -3   76.29    2.50
  -8   1  -3   83.19    3.20
  -8   1  -3   77.79    3.00
   8  -1   3   83.69    3.00
   8  -1   3   76.29    3.10
   8  -1   3   75.89    2.60
  -9   1  -3    9.10    1.40
  -9   1  -3    8.10    1.30
  -9   1  -3    8.40    0.90
   9  -1   3    8.60    0.90
   9  -1   3    7.80    1.30
   9  -1   3    8.70    1.30
 -10   1  -3    0.10    1.00
 -10   1  -3    0.20    0.60
 -10   1  -3    0.50    1.30
  10  -1   3    0.90    1.10
  10  -1   3   -0.20    1.20
  10  -1   3   -0.30    0.80
 -11   1  -3   12.20    1.30
 -11   1  -3   11.80    1.80
 -11   1  -3   13.60    2.00
  11  -1   3   12.60    1.90
  11  -1   3   13.10    1.70
  11  -1   3   14.30    1.40
  12  -1   3    2.00    1.30
  12  -1   3    1.60    2.00
  12   0  -3    2.40    1.70
 -12   0   3    2.40    1.60
 -12   0   3    3.00    1.90
  11   0  -3   -0.60    1.30
 -11   0   3   -0.20    1.10
 -11   0   3   -0.40    1.20
  10   0  -3    0.90    1.10
 -10   0   3    1.00    1.10
 -10   0   3    1.50    1.00
   9   0  -3   26.20    1.80
  -9   0   3   28.50    1.70
  -9   0   3   29.10    1.80
   8   0  -3   15.60    1.30
   8   0  -3   19.90    1.60
  -8   0   3   14.60    1.30
  -8   0   3   18.10    1.40
   7   0  -3    1.90    0.70
   7   0  -3    2.30    0.70
  -7   0   3    1.70    0.70
  -7   0   3    2.60    0.70
   6   0  -3   19.30    1.10
   6   0  -3   19.80    1.20
   6   0  -3   21.10    1.00
   6   0  -3   19.60    1.00
  -6   0   3   19.90    1.10
  -6   0   3   21.50    1.00
  -6   0   3   19.10    1.10
   5   0  -3    5.90    0.60
   5   0  -3    4.40    0.70
   5   0  -3    4.40    0.60
   5   0  -3    5.10    0.50
  -5   0   3    5.40    0.60
  -5   0   3    4.10    0.60
  -5   0   3    5.40    0.50
   4   0  -3  115.69    3.10
   4   0  -3  102.39    3.20
   4   0  -3  103.19    3.30
   4   0  -3  110.49    3.10
  -4   0   3  105.39    3.30
  -4   0   3  111.59    3.10
  -4   0   3  111.59    3.20
   3   0  -3  299.27    7.60
   3   0  -3  272.87    7.70
   3   0  -3  276.27    7.60
   3   0  -3  284.97    7.80
  -3   0   3  291.37    7.80
  -3   0   3  292.97    7.70
  -3   0   3  278.27    7.70
   2   0  -3   66.69    2.00
   2   0  -3   72.09    2.20
  -2   0   3   67.29    2.00
  -2   0   3   71.19    2.10
   1   0  -3   12.20    0.40
   1   0  -3   12.30    0.40
   1   0  -3   12.20    0.40
   1   0  -3   12.00    0.60
  -1   0   3   11.00    0.50
  -1   0   3   12.00    0.40
   0   0  -3  436.96   11.50
   0   0  -3  434.96   11.40
   0   0  -3  433.16   11.40
   0   0   3  427.56   11.20
   0   0   3  425.76   11.20
   0   0   3  425.66   11.40
  -1   0  -3   74.39    2.20
  -1   0  -3   75.79    2.20
  -1   0  -3   76.59    2.20
  -2   0  -3  206.48    5.70
  -2   0  -3  202.48    5.60
  -2   0  -3  203.48    5.60
   2   0   3  203.78    5.60
   2   0   3  210.78    5.40
   2   0   3  205.58    5.40
  -3   0  -3  157.58    4.30
  -3   0  -3  157.18    4.10
  -3   0  -3  155.18    4.10
  -3   0  -3  157.18    4.50
   3   0   3  154.48    4.10
   3   0   3  148.29    4.30
   3   0   3  150.18    4.10
  -4   0  -3   69.79    2.00
  -4   0  -3   74.19    2.40
  -4   0  -3   70.79    2.30
  -4   0  -3   74.19    2.00
   4   0   3   71.89    2.10
   4   0   3   68.49    2.20
   4   0   3   69.89    2.00
  -5   0  -3   -0.10    0.20
  -5   0  -3    0.00    0.40
  -5   0  -3   -0.20    0.30
  -5   0  -3   -0.20    0.50
   5   0   3    0.20    0.20
   5   0   3    0.10    0.40
  -6   0  -3   68.29    2.10
  -6   0  -3   71.39    2.40
  -6   0  -3   68.49    2.50
   6   0   3   69.59    2.20
   6   0   3   71.09    2.40
  -7   0  -3    1.10    0.70
  -7   0  -3    1.10    0.60
  -7   0  -3    1.80    0.40
   7   0   3    2.70    0.50
   7   0   3    1.70    0.70
  -8   0  -3    8.10    1.10
  -8   0  -3    7.40    0.70
  -8   0  -3    7.70    1.10
   8   0   3    7.30    1.00
   8   0   3    8.50    0.80
   8   0   3    8.70    1.10
  -9   0  -3   60.69    2.10
  -9   0  -3   63.59    2.80
  -9   0  -3   58.09    2.50
   9   0   3   57.29    2.50
   9   0   3   62.79    2.70
   9   0   3   57.79    2.20
 -10   0  -3   10.20    1.50
 -10   0  -3   10.10    1.00
 -10   0  -3    9.20    1.40
  10   0   3    9.70    1.40
  10   0   3    8.00    1.00
  10   0   3   10.40    1.40
 -11   0  -3    8.30    1.00
 -11   0  -3    7.10    1.40
 -11   0  -3    8.60    1.80
  11   0   3    6.80    1.40
  11   0   3    8.20    1.20
  11   0   3    7.30    1.60
 -12   0  -3    1.00    1.60
 -12   0  -3    1.70    0.90
 -12   0  -3    2.10    1.70
  12   0   3    1.50    1.70
  12   0   3    2.90    1.20
  12   0   3    1.40    1.50
  11  -1  -3   -0.20    1.40
 -11   1   3   -0.20    1.30
 -11   1   3    0.70    1.30
  10  -1  -3    0.80    1.20
 -10   1   3    0.90    1.10
 -10   1   3    0.80    1.00
   9  -1  -3    0.90    1.00
  -9   1   3    0.50    0.90
  -9   1   3    0.30    0.90
   8  -1  -3    5.30    1.10
   8  -1  -3    5.80    1.10
  -8   1   3    7.20    1.00
  -8   1   3    5.00    1.00
   7  -1  -3    2.10    0.70
   7  -1  -3    2.90    0.80
  -7   1   3    4.30    0.80
  -7   1   3    2.50    0.70
   6  -1  -3    2.40    0.60
   6  -1  -3    2.10    0.70
   6  -1  -3    2.40    0.60
   6  -1  -3    1.20    0.60
  -6   1   3    1.80    0.60
  -6   1   3    1.80    0.60
  -6   1   3    1.20    0.50
   5  -1  -3   39.80    1.40
   5  -1  -3   41.00    1.40
   5  -1  -3   36.20    1.60
   5  -1  -3   38.70    1.50
  -5   1   3   36.20    1.50
  -5   1   3   35.40    1.50
  -5   1   3   41.50    1.40
   4  -1  -3  132.79    3.90
   4  -1  -3  130.49    4.00
   4  -1  -3  138.99    3.80
   4  -1  -3  133.59    3.80
  -4   1   3  128.99    3.80
  -4   1   3  130.79    3.90
  -4   1   3  131.89    3.80
   3  -1  -3  113.29    3.30
   3  -1  -3  118.49    3.20
   3  -1  -3  115.89    3.20
   3  -1  -3  113.49    3.40
  -3   1   3  107.79    3.30
  -3   1   3  111.39    3.30
  -3   1   3  112.59    3.20
   2  -1  -3  558.24   14.70
   2  -1  -3  570.74   14.70
   2  -1  -3  548.65   14.80
  -2   1   3  536.25   14.70
  -2   1   3  559.24   14.70
  -2   1   3  561.64   14.80
   1  -1  -3  100.79    2.80
   1  -1  -3  107.79    2.80
   1  -1  -3   99.89    3.00
  -1   1   3   99.59    2.80
  -1   1   3  103.09    2.80
   0  -1  -3   42.80    1.30
   0  -1  -3   44.60    1.40
   0  -1  -3   43.00    1.20
   0  -1  -3   42.00    1.20
   0   1   3   41.40    1.20
   0   1   3   42.90    1.20
  -1  -1  -3 2431.06   64.49
  -1  -1  -3 2573.94   64.59
  -1  -1  -3 2440.26   64.59
   1   1   3 2468.75   64.29
   1   1   3 2379.26   64.29
  -2  -1  -3 1157.48   30.00
  -2  -1  -3 1139.69   30.10
  -2  -1  -3 1119.89   30.10
   2   1   3 1113.09   29.90
   2   1   3 1178.08   30.00
   2   1   3 1159.98   30.10
  -3  -1  -3    1.20    0.30
  -3  -1  -3    0.70    0.30
  -3  -1  -3    1.50    0.20
  -3  -1  -3    1.20    0.20
   3   1   3    0.90    0.20
   3   1   3    1.00    0.30
   3   1   3    1.10    0.20
  -4  -1  -3   23.90    1.00
  -4  -1  -3   25.80    0.80
  -4  -1  -3   24.90    0.80
  -4  -1  -3   20.90    1.10
   4   1   3   22.80    1.00
   4   1   3   24.60    0.80
  -5  -1  -3    1.60    0.30
  -5  -1  -3    1.00    0.50
  -5  -1  -3    1.00    0.20
  -5  -1  -3    1.30    0.40
   5   1   3    0.60    0.40
   5   1   3    1.10    0.30
  -6  -1  -3   50.39    1.80
  -6  -1  -3   49.60    2.00
  -6  -1  -3   49.60    1.60
   6   1   3   51.09    1.60
   6   1   3   48.10    1.80
  -7  -1  -3   51.69    2.00
  -7  -1  -3   52.19    1.70
  -7  -1  -3   49.70    2.10
   7   1   3   50.39    1.70
   7   1   3   49.70    2.00
  -8  -1  -3   15.30    1.20
  -8  -1  -3   17.10    0.90
  -8  -1  -3   17.00    1.30
   8   1   3   15.40    1.30
   8   1   3   13.90    0.90
  -9  -1  -3    4.60    1.00
  -9  -1  -3    2.90    0.60
  -9  -1  -3    4.20    1.00
   9   1   3    4.30    1.00
   9   1   3    3.20    0.60
 -10  -1  -3    6.20    1.40
 -10  -1  -3    5.90    1.20
 -10  -1  -3    5.60    0.80
  10   1   3    6.50    0.90
  10   1   3    7.20    1.30
  10   1   3    6.60    1.30
 -11  -1  -3   -0.10    0.70
 -11  -1  -3    0.40    1.10
 -11  -1  -3   -0.20    1.10
  11   1   3    0.30    1.10
  11   1   3   -0.20    1.10
  11   1   3    0.10    0.80
 -12  -1  -3    0.80    0.80
 -12  -1  -3    1.00    1.50
 -12  -1  -3    1.60    1.70
  12   1   3    1.30    1.10
  12   1   3    0.70    1.60
  12   1   3    0.90    1.60
  11  -2  -3   20.40    2.50
 -11   2   3   25.00    2.40
 -11   2   3   25.20    2.30
  10  -2  -3    8.30    1.70
 -10   2   3    6.70    1.50
 -10   2   3    8.20    1.40
   9  -2  -3   21.40    1.80
  -9   2   3   22.90    1.70
  -9   2   3   22.00    1.80
   8  -2  -3  118.49    4.30
  -8   2   3  131.29    4.10
  -8   2   3  123.29    4.20
   7  -2  -3    0.40    0.70
   7  -2  -3    0.50    0.70
  -7   2   3    0.50    0.60
  -7   2   3    0.30    0.70
   6  -2  -3    3.50    0.70
   6  -2  -3    3.50    0.80
   6  -2  -3    3.60    0.80
  -6   2   3    3.70    0.80
  -6   2   3    2.50    0.70
   5  -2  -3   26.40    1.20
   5  -2  -3   23.50    1.30
   5  -2  -3   24.70    1.10
   5  -2  -3   22.50    1.20
  -5   2   3   23.00    1.20
  -5   2   3   23.80    1.20
  -5   2   3   23.30    1.10
   4  -2  -3   18.50    1.00
   4  -2  -3   19.20    0.90
   4  -2  -3   18.50    1.10
   4  -2  -3   16.30    0.90
  -4   2   3   16.30    0.90
   3  -2  -3    0.00    0.30
   3  -2  -3    0.00    0.30
   3  -2  -3   -0.10    0.40
   3  -2  -3    0.00    0.30
  -3   2   3   -0.10    0.40
  -3   2   3    0.00    0.30
  -3   2   3   -0.10    0.30
   2  -2  -3   78.89    2.50
   2  -2  -3   82.09    2.40
   2  -2  -3   84.99    2.40
   2  -2  -3   83.29    2.40
  -2   2   3   82.49    2.40
  -2   2   3   81.59    2.40
  -2   2   3   81.09    2.40
   1  -2  -3    0.20    0.30
   1  -2  -3   -0.20    0.20
   1  -2  -3    0.10    0.20
   1  -2  -3    0.00    0.20
  -1   2   3    0.00    0.20
  -1   2   3    0.20    0.20
  -1   2   3    0.20    0.20
   0  -2  -3   36.90    1.20
   0  -2  -3   38.60    1.30
   0  -2  -3   40.20    1.30
   0   2   3   38.10    1.10
   0   2   3   38.90    1.10
  -1  -2  -3  449.66   12.00
  -1  -2  -3  456.55   12.00
  -1  -2  -3  444.96   11.80
   1   2   3  443.96   11.80
  -2  -2  -3  200.68    5.20
  -2  -2  -3  201.58    5.30
  -2  -2  -3  198.08    5.40
  -2  -2  -3  195.28    5.30
  -2  -2  -3  195.98    5.50
   2   2   3  194.58    5.30
   2   2   3  197.98    5.40
  -3  -2  -3  801.12   21.10
  -3  -2  -3  789.12   20.80
  -3  -2  -3  829.82   20.90
  -3  -2  -3  781.02   21.00
  -3  -2  -3  804.22   20.90
   3   2   3  777.42   21.00
   3   2   3  777.52   20.90
  -4  -2  -3   30.20    1.30
  -4  -2  -3   35.80    1.10
  -4  -2  -3   32.60    1.10
  -4  -2  -3   33.00    1.00
   4   2   3   30.10    1.20
   4   2   3   32.90    1.00
  -5  -2  -3  198.68    5.60
  -5  -2  -3  210.78    5.60
  -5  -2  -3  202.78    5.80
  -5  -2  -3  202.88    5.50
   5   2   3  203.98    5.50
   5   2   3  197.68    5.70
  -6  -2  -3  168.18    4.70
  -6  -2  -3  158.18    4.80
  -6  -2  -3  160.18    4.50
   6   2   3  159.78    4.70
   6   2   3  154.48    4.50
  -7  -2  -3   47.20    1.60
  -7  -2  -3   49.10    1.80
  -7  -2  -3   48.20    2.00
   7   2   3   43.30    1.90
   7   2   3   48.90    1.60
  -8  -2  -3   10.10    0.80
  -8  -2  -3    9.80    1.20
  -8  -2  -3   10.50    1.00
   8   2   3    9.30    1.00
   8   2   3    9.70    0.80
  -9  -2  -3   51.69    2.30
  -9  -2  -3   54.69    2.40
  -9  -2  -3   52.39    1.90
   9   2   3   52.89    2.00
   9   2   3   55.79    2.40
 -10  -2  -3   15.00    1.40
 -10  -2  -3   15.50    1.10
 -10  -2  -3   15.80    1.70
  10   2   3   15.70    1.50
  10   2   3   15.20    1.20
 -11  -2  -3    5.00    0.80
 -11  -2  -3    3.20    1.20
 -11  -2  -3    3.80    1.10
  11   2   3    4.80    1.20
  11   2   3    3.40    0.90
  11   2   3    4.10    1.20
 -12  -2  -3   65.59    3.40
 -12  -2  -3   60.19    2.50
 -12  -2  -3   61.19    3.20
  12   2   3   57.89    3.10
  12   2   3   62.79    3.20
  12   2   3   62.69    2.70
 -13  -2  -3   52.89    3.10
  13   2   3   59.69    3.50
  10  -3  -3   -0.10    1.60
 -10   3   3   -0.30    1.20
 -10   3   3    0.20    1.40
   9  -3  -3    6.10    1.50
  -9   3   3    6.10    1.30
  -9   3   3    7.80    1.30
   8  -3  -3    1.70    1.00
  -8   3   3    2.70    0.90
  -8   3   3    1.30    1.00
   7  -3  -3   11.60    1.30
  -7   3   3   11.50    1.40
  -7   3   3   12.30    1.30
   6  -3  -3    0.80    0.70
   6  -3  -3    0.80    0.70
   6  -3  -3    0.40    0.70
  -6   3   3    0.80    0.70
  -6   3   3    0.80    0.70
   5  -3  -3   29.80    1.50
   5  -3  -3   28.60    1.50
   5  -3  -3   29.80    1.30
   5  -3  -3   32.40    1.50
  -5   3   3   29.70    1.40
  -5   3   3   28.30    1.50
   4  -3  -3  142.99    4.20
   4  -3  -3  138.69    4.10
   4  -3  -3  136.79    4.20
   4  -3  -3  139.49    4.30
  -4   3   3  139.09    4.10
  -4   3   3  149.39    4.10
  -4   3   3  133.89    4.20
   3  -3  -3    7.00    0.70
   3  -3  -3    7.20    0.70
   3  -3  -3    7.80    0.70
   3  -3  -3    8.00    0.60
  -3   3   3    6.90    0.60
  -3   3   3    7.40    0.60
  -3   3   3    6.90    0.60
   2  -3  -3  292.97    7.90
   2  -3  -3  289.37    7.90
   2  -3  -3  281.37    7.90
   2  -3  -3  296.17    7.80
  -2   3   3  283.47    7.90
  -2   3   3  290.07    7.90
  -2   3   3  291.17    7.80
   1  -3  -3    2.90    0.40
   1  -3  -3    2.80    0.40
   1  -3  -3    3.40    0.40
   1  -3  -3    3.40    0.40
  -1   3   3    2.60    0.30
  -1   3   3    3.20    0.30
   0  -3  -3   15.00    0.70
   0  -3  -3   15.30    0.70
   0  -3  -3   18.10    0.70
   0  -3  -3   17.60    0.80
   0   3   3   16.50    0.70
   0   3   3   15.90    0.60
   0   3   3   17.30    0.60
  -1  -3  -3  383.26   10.20
  -1  -3  -3  379.96   10.30
  -1  -3  -3  377.06   10.30
   1   3   3  385.46   10.20
   1   3   3  386.16   10.10
  -2  -3  -3  589.64   15.40
  -2  -3  -3  582.34   15.20
  -2  -3  -3  572.24   15.30
   2   3   3  556.94   15.20
  -3  -3  -3  461.15   12.10
  -3  -3  -3  458.85   12.00
  -3  -3  -3  452.15   12.20
   3   3   3  461.15   12.20
   3   3   3  446.16   12.10
  -4  -3  -3  243.58    6.30
  -4  -3  -3  229.38    6.30
  -4  -3  -3  229.28    6.50
   4   3   3  230.68    6.30
   4   3   3  232.88    6.50
  -5  -3  -3    3.10    0.40
  -5  -3  -3    2.40    0.40
  -5  -3  -3    2.10    0.50
   5   3   3    2.00    0.50
   5   3   3    2.80    0.50
  -6  -3  -3  297.67    8.20
  -6  -3  -3  296.27    8.10
  -6  -3  -3  291.67    8.40
   6   3   3  300.67    8.10
   6   3   3  299.47    8.30
   6   3   3  297.67    8.40
  -7  -3  -3    1.10    0.50
  -7  -3  -3    0.70    0.40
  -7  -3  -3    0.70    0.60
   7   3   3    0.90    0.40
   7   3   3    1.50    0.60
  -8  -3  -3   11.40    1.10
  -8  -3  -3   10.70    1.00
  -8  -3  -3   13.20    0.90
   8   3   3   10.10    1.00
   8   3   3   10.90    0.80
  -9  -3  -3   39.30    1.80
  -9  -3  -3   41.50    1.60
  -9  -3  -3   41.90    2.00
   9   3   3   41.70    1.70
   9   3   3   42.10    2.00
 -10  -3  -3   24.40    1.40
 -10  -3  -3   26.60    1.60
 -10  -3  -3   27.70    1.80
  10   3   3   26.40    1.50
  10   3   3   25.90    1.70
 -11  -3  -3   56.89    2.20
 -11  -3  -3   61.59    2.90
 -11  -3  -3   58.59    2.70
  11   3   3   54.69    2.70
  11   3   3   63.69    2.40
 -12  -3  -3   11.40    1.70
 -12  -3  -3   10.50    1.70
 -12  -3  -3    9.70    1.10
  12   3   3    9.80    1.60
  12   3   3   13.50    1.50
 -13  -3  -3   25.10    1.80
 -13  -3  -3   24.10    2.50
  13   3   3   24.10    2.50
  10  -4  -3    6.90    2.10
 -10   4   3    6.80    1.50
 -10   4   3    8.80    2.00
   9  -4  -3    5.40    1.60
  -9   4   3    6.40    1.30
  -9   4   3    4.30    1.40
   8  -4  -3    9.60    1.50
  -8   4   3    8.20    1.20
  -8   4   3    8.80    1.40
   7  -4  -3   12.90    1.60
  -7   4   3   13.00    1.40
  -7   4   3   13.40    1.40
   6  -4  -3   27.30    1.70
   6  -4  -3   27.80    1.60
  -6   4   3   23.50    1.50
  -6   4   3   26.20    1.60
   5  -4  -3    0.30    0.70
   5  -4  -3    0.00    0.70
   5  -4  -3   -0.30    1.00
   5  -4  -3    0.10    0.70
  -5   4   3    0.60    0.60
  -5   4   3   -0.30    0.60
   4  -4  -3   95.89    3.20
   4  -4  -3  102.39    3.10
   4  -4  -3  100.49    3.20
   4  -4  -3   98.69    3.20
  -4   4   3   93.69    3.20
  -4   4   3   99.99    3.10
   3  -4  -3   48.20    1.80
   3  -4  -3   51.89    1.90
   3  -4  -3   49.10    1.80
  -3   4   3   46.50    1.80
  -3   4   3   46.70    1.80
  -3   4   3   50.19    1.70
   2  -4  -3   20.60    0.90
   2  -4  -3   20.70    1.00
   2  -4  -3   18.20    1.00
   2  -4  -3   21.00    1.00
  -2   4   3   21.20    0.90
  -2   4   3   18.90    1.00
  -2   4   3   19.40    0.90
   1  -4  -3  291.47    8.00
   1  -4  -3  294.97    8.00
   1  -4  -3  298.47    7.90
   1  -4  -3  285.77    8.10
  -1   4   3  284.87    7.90
  -1   4   3  294.57    7.90
  -1   4   3  290.27    8.00
   0  -4  -3   17.30    0.80
   0  -4  -3   17.50    0.80
   0  -4  -3   20.50    0.80
   0  -4  -3   18.90    0.90
   0   4   3   19.40    0.80
   0   4   3   18.00    0.70
   0   4   3   18.80    0.90
  -1  -4  -3  366.96    9.90
  -1  -4  -3  362.96   10.10
  -1  -4  -3  370.86   10.00
  -1  -4  -3  369.26   10.00
   1   4   3  377.06    9.80
   1   4   3  383.76   10.00
   1   4   3  365.86    9.90
  -2  -4  -3   76.39    2.20
  -2  -4  -3   73.19    2.40
  -2  -4  -3   73.59    2.30
  -2  -4  -3   70.49    2.20
  -2  -4  -3   75.89    2.00
   2   4   3   78.39    2.30
   2   4   3   72.09    2.20
  -3  -4  -3  122.19    3.50
  -3  -4  -3  121.29    3.60
  -3  -4  -3  124.79    3.30
  -3  -4  -3  119.29    3.70
  -3  -4  -3  120.89    3.50
   3   4   3  125.19    3.40
   3   4   3  122.59    3.50
   3   4   3  128.59    3.60
  -4  -4  -3  534.75   14.40
  -4  -4  -3  532.95   14.10
  -4  -4  -3  528.35   14.20
   4   4   3  555.44   14.20
   4   4   3  520.55   14.30
   4   4   3  520.75   14.10
  -5  -4  -3   62.99    2.00
  -5  -4  -3   63.89    2.30
  -5  -4  -3   69.49    2.00
   5   4   3   65.59    2.00
   5   4   3   63.69    2.10
   5   4   3   63.79    2.20
  -6  -4  -3   17.20    0.90
  -6  -4  -3   18.90    1.10
  -6  -4  -3   19.50    0.90
   6   4   3   20.50    0.90
   6   4   3   18.70    1.10
   6   4   3   18.80    1.00
  -7  -4  -3    1.40    0.60
  -7  -4  -3    1.60    0.50
  -7  -4  -3    2.20    0.60
   7   4   3    1.30    0.40
   7   4   3    1.70    0.60
  -8  -4  -3   41.40    1.60
  -8  -4  -3   38.40    1.90
  -8  -4  -3   38.50    1.60
   8   4   3   40.70    1.90
   8   4   3   42.30    1.60
  -9  -4  -3   24.00    1.20
  -9  -4  -3   20.80    1.40
  -9  -4  -3   25.30    1.60
   9   4   3   19.90    1.40
   9   4   3   19.70    1.20
 -10  -4  -3   28.40    1.40
 -10  -4  -3   25.60    1.60
 -10  -4  -3   27.70    1.90
  10   4   3   23.00    1.70
  10   4   3   27.00    1.50
 -11  -4  -3   11.40    1.10
 -11  -4  -3   10.90    1.50
 -11  -4  -3   11.70    1.40
  11   4   3   12.40    1.60
  11   4   3    9.00    1.00
 -12  -4  -3   10.40    1.60
 -12  -4  -3    9.50    2.60
 -12  -4  -3    8.20    1.10
  12   4   3    7.50    1.50
 -13  -4  -3   18.90    2.10
 -13  -4  -3   18.80    1.70
  13   4   3   17.40    2.30
  -9   5   3    6.30    1.80
  -9   5   3    4.40    1.30
  -8   5   3   32.70    2.00
  -8   5   3   32.50    2.20
   7  -5  -3   -0.10    1.10
   7  -5  -3   -0.40    1.10
  -7   5   3    0.00    0.90
  -7   5   3    0.20    0.90
   6  -5  -3   21.20    1.70
   6  -5  -3   22.60    1.60
  -6   5   3   20.20    1.50
  -6   5   3   24.00    1.50
   5  -5  -3    6.20    1.00
   5  -5  -3    6.20    0.90
  -5   5   3    6.90    0.90
  -5   5   3    6.90    1.00
   4  -5  -3   35.70    1.50
   4  -5  -3   34.40    1.70
   4  -5  -3   36.20    1.80
   4  -5  -3   33.70    1.70
  -4   5   3   35.70    1.70
  -4   5   3   34.60    1.60
   3  -5  -3    0.10    0.60
   3  -5  -3    0.10    0.60
   3  -5  -3    0.40    0.50
   3  -5  -3    0.30    0.50
  -3   5   3    0.50    0.50
  -3   5   3    0.60    0.50
   2  -5  -3   29.70    1.40
   2  -5  -3   32.10    1.20
   2  -5  -3   30.10    1.30
   2  -5  -3   30.90    1.50
  -2   5   3   28.30    1.20
  -2   5   3   30.40    1.30
  -2   5   3   29.10    1.30
   1  -5  -3   68.79    2.10
   1  -5  -3   69.39    2.30
   1  -5  -3   68.79    2.20
   1  -5  -3   72.59    2.40
  -1   5   3   69.49    2.20
  -1   5   3   66.09    2.20
  -1   5   3   66.59    2.20
   0  -5  -3  282.27    7.70
   0  -5  -3  287.57    7.80
   0  -5  -3  279.17    7.90
   0  -5  -3  285.17    7.70
   0   5   3  279.97    7.70
   0   5   3  280.77    7.80
   0   5   3  279.17    7.70
  -1  -5  -3  158.58    4.30
  -1  -5  -3  151.68    4.40
  -1  -5  -3  157.08    4.60
  -1  -5  -3  152.78    4.40
   1   5   3  154.98    4.40
   1   5   3  152.48    4.30
   1   5   3  155.18    4.30
  -2  -5  -3   28.40    0.90
  -2  -5  -3   24.50    1.00
  -2  -5  -3   28.00    1.20
  -2  -5  -3   24.50    1.00
   2   5   3   27.00    1.10
   2   5   3   25.70    0.90
   2   5   3   26.00    1.00
  -3  -5  -3    1.20    0.40
  -3  -5  -3    1.00    0.40
  -3  -5  -3    2.00    0.40
  -3  -5  -3    1.30    0.40
  -3  -5  -3    1.60    0.30
   3   5   3    1.50    0.40
   3   5   3    1.90    0.30
   3   5   3    1.70    0.40
  -4  -5  -3    1.50    0.30
  -4  -5  -3    1.10    0.40
  -4  -5  -3    1.70    0.40
  -4  -5  -3    1.10    0.50
   4   5   3    1.60    0.40
   4   5   3    1.60    0.40
   4   5   3    1.60    0.40
  -5  -5  -3    3.20    0.50
  -5  -5  -3    4.40    0.50
  -5  -5  -3    1.90    0.50
  -5  -5  -3    3.20    0.40
   5   5   3    2.90    0.50
   5   5   3    2.60    0.40
   5   5   3    2.80    0.60
  -6  -5  -3   22.90    1.00
  -6  -5  -3   21.80    1.20
  -6  -5  -3   19.90    1.00
   6   5   3   21.90    1.20
   6   5   3   22.70    1.00
   6   5   3   20.20    1.10
  -7  -5  -3    6.00    0.70
  -7  -5  -3    5.20    0.80
  -7  -5  -3    6.50    0.70
   7   5   3    7.20    0.70
   7   5   3    6.60    0.80
  -8  -5  -3   22.60    1.30
  -8  -5  -3   25.00    1.50
  -8  -5  -3   22.60    1.20
   8   5   3   26.50    1.20
   8   5   3   23.70    1.40
  -9  -5  -3    2.00    0.60
  -9  -5  -3    3.50    0.80
  -9  -5  -3    1.90    0.80
   9   5   3    1.60    0.80
   9   5   3    1.90    0.60
 -10  -5  -3    2.70    0.90
 -10  -5  -3    1.20    0.70
 -10  -5  -3    3.00    1.10
  10   5   3    1.70    0.70
  10   5   3    3.10    1.00
 -11  -5  -3    1.10    1.20
 -11  -5  -3    0.90    0.70
 -11  -5  -3    0.60    0.90
  11   5   3    0.20    1.00
  11   5   3    1.00    0.90
 -12  -5  -3   24.30    2.00
 -12  -5  -3   24.50    1.70
  12   5   3   23.80    2.00
 -13  -5  -3    2.70    1.10
 -13  -5  -3    1.80    1.50
  13   5   3    0.70    1.60
  -8   6   3   24.50    2.30
  -8   6   3   29.60    2.20
   7  -6  -3    1.40    1.70
  -7   6   3    1.90    1.00
  -7   6   3    1.30    1.10
   6  -6  -3    0.20    1.00
  -6   6   3    0.30    1.00
  -6   6   3    0.20    0.80
   5  -6  -3   13.60    1.50
  -5   6   3   14.80    1.30
  -5   6   3   14.50    1.30
   4  -6  -3   72.19    2.90
   4  -6  -3   75.19    2.80
  -4   6   3   77.59    2.80
  -4   6   3   81.59    2.80
   3  -6  -3   31.30    1.50
   3  -6  -3   36.30    1.50
   3  -6  -3   33.40    1.70
   3  -6  -3   35.70    1.80
  -3   6   3   32.00    1.50
  -3   6   3   29.20    1.50
   2  -6  -3    0.20    0.50
   2  -6  -3    0.80    0.60
   2  -6  -3    0.40    0.60
   2  -6  -3    0.80    0.50
  -2   6   3    0.40    0.50
  -2   6   3    0.40    0.50
   1  -6  -3    3.00    0.60
   1  -6  -3    3.20    0.70
   1  -6  -3    2.50    0.60
  -1   6   3    2.50    0.50
  -1   6   3    4.50    0.60
  -1   6   3    3.40    0.60
   0  -6  -3   36.70    1.50
   0  -6  -3   35.90    1.40
   0  -6  -3   38.80    1.40
   0  -6  -3   37.80    1.60
   0   6   3   38.70    1.50
   0   6   3   37.30    1.40
   0   6   3   37.10    1.40
  -1  -6  -3  391.86   10.50
  -1  -6  -3  391.86   10.50
  -1  -6  -3  384.96   10.80
  -1  -6  -3  391.16   10.60
   1   6   3  382.96   10.60
   1   6   3  387.16   10.50
   1   6   3  396.06   10.50
  -2  -6  -3   42.70    1.50
  -2  -6  -3   41.90    1.40
  -2  -6  -3   41.70    1.50
  -2  -6  -3   42.30    1.70
  -2  -6  -3   41.10    1.50
   2   6   3   40.40    1.40
   2   6   3   39.80    1.40
   2   6   3   41.70    1.60
  -3  -6  -3    7.40    0.60
  -3  -6  -3    5.70    0.60
  -3  -6  -3    7.40    0.60
  -3  -6  -3    7.20    0.50
  -3  -6  -3    5.50    0.70
   3   6   3    6.20    0.70
   3   6   3    6.80    0.60
   3   6   3    7.60    0.60
  -4  -6  -3   23.20    0.90
  -4  -6  -3   21.80    1.20
  -4  -6  -3   22.60    1.00
  -4  -6  -3   23.90    1.00
   4   6   3   22.70    1.00
   4   6   3   22.70    1.00
   4   6   3   21.00    1.10
  -5  -6  -3   46.80    1.80
  -5  -6  -3   56.39    1.80
  -5  -6  -3   49.10    2.00
  -5  -6  -3   54.69    1.70
   5   6   3   52.19    1.80
   5   6   3   53.29    1.80
   5   6   3   52.49    1.90
  -6  -6  -3  239.48    6.80
  -6  -6  -3  238.08    6.80
   6   6   3  252.97    6.90
   6   6   3  248.08    7.00
   6   6   3  246.98    6.80
  -7  -6  -3  135.99    4.40
  -7  -6  -3  141.09    4.10
  -7  -6  -3  140.09    4.10
   7   6   3  141.29    4.10
   7   6   3  136.09    4.30
  -8  -6  -3   71.19    2.80
  -8  -6  -3   75.39    2.50
  -8  -6  -3   72.89    2.50
   8   6   3   75.29    2.70
   8   6   3   75.59    2.50
  -9  -6  -3   46.60    2.10
  -9  -6  -3   44.50    1.90
  -9  -6  -3   43.70    1.80
   9   6   3   43.30    2.00
   9   6   3   43.20    1.80
 -10  -6  -3   23.60    1.50
 -10  -6  -3   22.60    1.80
 -10  -6  -3   20.10    1.30
  10   6   3   22.90    1.60
  10   6   3   20.50    1.40
 -11  -6  -3   17.90    1.70
 -11  -6  -3   18.00    1.70
 -11  -6  -3   17.80    1.40
  11   6   3   16.00    1.60
 -12  -6  -3    2.20    0.90
 -12  -6  -3    2.50    1.20
  12   6   3    1.80    1.20
 -13  -6  -3    9.80    1.70
 -13  -6  -3   10.50    1.40
  13   6   3   12.70    2.00
  -8   7   3   12.00    1.70
  -8   7   3   10.70    2.10
  -7   7   3   16.70    1.90
  -7   7   3   14.60    1.70
   6  -7  -3    9.10    1.50
  -6   7   3    8.10    1.20
  -6   7   3   11.10    1.50
   5  -7  -3   12.70    1.60
  -5   7   3   12.60    1.50
  -5   7   3   13.70    1.40
   4  -7  -3   29.20    1.90
  -4   7   3   38.60    1.80
  -4   7   3   37.60    1.90
   3  -7  -3    6.70    1.10
  -3   7   3    7.30    1.00
  -3   7   3    7.90    1.00
   2  -7  -3  164.18    4.70
   2  -7  -3  155.88    5.10
  -2   7   3  161.08    4.80
  -2   7   3  156.28    4.80
   1  -7  -3  129.59    4.30
   1  -7  -3  130.79    4.10
   1  -7  -3  141.29    4.00
  -1   7   3  137.59    4.10
  -1   7   3  129.49    4.10
   0  -7  -3   82.39    2.90
   0  -7  -3   83.89    2.60
   0  -7  -3   82.99    2.60
   0  -7  -3   77.89    2.70
   0   7   3   79.99    2.60
   0   7   3   84.89    2.70
  -1  -7  -3   16.90    1.10
  -1  -7  -3   16.10    0.90
  -1  -7  -3   18.00    1.10
  -1  -7  -3   16.40    1.00
   1   7   3   19.70    1.00
   1   7   3   14.80    1.00
   1   7   3   15.00    0.90
  -2  -7  -3  165.38    4.90
  -2  -7  -3  172.78    4.80
  -2  -7  -3  166.58    5.20
  -2  -7  -3  176.18    5.00
   2   7   3  182.18    4.90
   2   7   3  170.78    4.90
   2   7   3  168.08    4.80
   2   7   3  169.48    5.00
  -3  -7  -3  119.19    3.70
  -3  -7  -3  118.89    3.60
  -3  -7  -3  122.69    3.50
  -3  -7  -3  121.99    4.00
  -3  -7  -3  122.09    3.60
   3   7   3  122.99    3.70
   3   7   3  129.29    3.60
   3   7   3  128.69    3.60
  -4  -7  -3    4.70    0.60
  -4  -7  -3    3.10    0.70
  -4  -7  -3    3.50    0.60
  -4  -7  -3    4.40    0.50
   4   7   3    3.10    0.60
   4   7   3    5.00    0.60
   4   7   3    3.90    0.50
  -5  -7  -3    0.10    0.60
  -5  -7  -3    0.30    0.40
  -5  -7  -3    0.60    0.50
   5   7   3    0.10    0.40
   5   7   3    0.00    0.40
   5   7   3    0.20    0.60
  -6  -7  -3   52.69    2.20
  -6  -7  -3   55.19    1.80
  -6  -7  -3   46.70    1.90
   6   7   3   50.49    2.00
   6   7   3   53.59    1.90
   6   7   3   56.29    2.00
  -7  -7  -3    5.90    0.90
  -7  -7  -3    6.90    0.80
  -7  -7  -3    5.20    0.70
   7   7   3    6.30    0.80
   7   7   3    7.10    0.90
  -8  -7  -3    5.90    0.80
  -8  -7  -3    7.40    0.90
  -8  -7  -3    6.10    1.00
   8   7   3    6.70    1.00
   8   7   3    3.80    0.70
  -9  -7  -3    6.70    0.90
  -9  -7  -3    7.70    1.20
  -9  -7  -3    5.50    0.80
   9   7   3    5.50    1.00
   9   7   3    7.20    0.90
 -10  -7  -3   20.20    1.40
 -10  -7  -3   17.90    1.40
 -10  -7  -3   15.20    1.50
  10   7   3   17.70    1.50
 -11  -7  -3   12.40    1.60
 -11  -7  -3   14.80    1.40
  11   7   3   14.10    1.70
 -12  -7  -3   -0.10    0.90
  12   7   3    0.10    1.20
 -13  -7  -3    4.90    1.20
  13   7   3    5.80    1.60
  -7   8   3    2.50    1.40
  -7   8   3    1.70    1.80
   6  -8  -3    0.40    1.30
  -6   8   3    0.00    1.10
  -6   8   3   -0.30    1.20
   5  -8  -3   26.80    2.10
  -5   8   3   27.30    1.80
  -5   8   3   27.90    2.10
   4  -8  -3   30.70    2.00
  -4   8   3   28.80    2.00
  -4   8   3   27.30    1.70
   3  -8  -3    5.20    1.20
  -3   8   3    4.00    0.90
  -3   8   3    4.80    1.10
   2  -8  -3    2.60    0.90
  -2   8   3    2.50    0.80
  -2   8   3    1.90    0.80
   1  -8  -3   33.00    1.80
  -1   8   3   32.20    1.60
  -1   8   3   29.30    1.60
   0  -8  -3   -0.10    0.70
   0  -8  -3   -0.10    0.60
   0  -8  -3    0.00    0.70
   0   8   3    0.00    0.60
   0   8   3    0.10    0.60
  -1  -8  -3   10.20    0.90
  -1  -8  -3    9.60    1.10
  -1  -8  -3    9.70    1.10
   1   8   3    9.30    0.90
   1   8   3    8.20    0.90
  -2  -8  -3   16.70    1.20
  -2  -8  -3   18.40    1.00
  -2  -8  -3   19.40    1.00
  -2  -8  -3   17.70    1.30
   2   8   3   19.20    1.10
   2   8   3   16.00    1.20
  -3  -8  -3   30.30    1.30
  -3  -8  -3   27.50    1.60
  -3  -8  -3   27.10    1.40
  -3  -8  -3   30.20    1.50
   3   8   3   27.70    1.40
   3   8   3   28.80    1.40
   3   8   3   30.90    1.30
  -4  -8  -3    0.90    0.60
  -4  -8  -3    0.60    0.70
   4   8   3    1.00    0.60
   4   8   3    0.90    0.50
   4   8   3    0.80    0.60
  -5  -8  -3   28.90    1.60
  -5  -8  -3   27.20    1.40
   5   8   3   24.40    1.40
   5   8   3   27.70    1.30
   5   8   3   27.30    1.30
  -6  -8  -3    2.80    0.70
  -6  -8  -3    1.80    0.70
   6   8   3    3.10    0.70
   6   8   3    3.30    0.80
   6   8   3    4.40    0.80
  -7  -8  -3    0.60    0.60
  -7  -8  -3    0.40    0.80
   7   8   3    0.90    0.60
   7   8   3    1.30    0.70
  -8  -8  -3   30.00    1.80
  -8  -8  -3   30.90    1.50
   8   8   3   31.40    1.70
  -9  -8  -3    7.40    1.00
  -9  -8  -3    8.20    1.20
   9   8   3    7.30    1.10
 -10  -8  -3    9.20    1.40
 -10  -8  -3    8.40    1.10
  10   8   3   10.00    1.30
 -11  -8  -3   12.90    1.40
 -11  -8  -3   14.70    1.80
  11   8   3   14.50    1.80
 -12  -8  -3   37.10    2.10
  12   8   3   33.70    2.50
 -13  -8  -3    4.70    1.30
  13   8   3    5.80    1.80
   6  -9  -3   27.20    2.70
  -6   9   3   30.00    2.30
   5  -9  -3    0.30    1.60
  -5   9   3    0.20    1.20
   4  -9  -3    5.10    1.40
  -4   9   3    4.70    1.20
   3  -9  -3    0.40    1.10
  -3   9   3   -0.20    0.90
   2  -9  -3    2.90    1.10
  -2   9   3    3.30    0.90
   1  -9  -3   -0.10    0.90
  -1   9   3   -0.10    0.80
   0  -9  -3    4.70    1.10
   0   9   3    5.40    0.90
  -1  -9  -3   19.40    1.50
   1   9   3   23.40    1.40
  -2  -9  -3   84.59    3.10
  -2  -9  -3   91.29    3.30
   2   9   3   86.69    3.00
  -3  -9  -3   95.39    3.40
  -3  -9  -3   93.39    3.20
   3   9   3   88.09    3.10
  -4  -9  -3   -0.10    0.70
  -4  -9  -3    0.10    0.60
   4   9   3   -0.10    0.60
  -5  -9  -3   38.70    1.90
  -5  -9  -3   30.80    1.50
   5   9   3   30.90    1.60
  -6  -9  -3   11.90    1.40
  -6  -9  -3    9.90    1.10
   6   9   3    9.80    1.10
  -7  -9  -3   54.89    2.50
  -7  -9  -3   58.19    2.30
   7   9   3   53.89    2.20
  -8  -9  -3  145.49    4.50
   8   9   3  136.99    4.50
  -9  -9  -3    1.90    0.90
  -9  -9  -3    0.80    1.10
   9   9   3    2.30    1.00
 -10  -9  -3   68.99    3.00
 -10  -9  -3   70.29    2.80
  10   9   3   68.79    2.80
 -11  -9  -3    1.10    1.00
 -11  -9  -3    2.10    1.40
  11   9   3    1.60    1.20
 -12  -9  -3    0.10    1.10
  12   9   3   -0.70    1.30
 -13  -9  -3    0.90    1.30
  13   9   3   -0.10    1.70
   4 -10  -3   16.50    2.20
  -4  10   3   14.50    1.60
   3 -10  -3    5.40    1.60
  -3  10   3    4.60    1.20
   2 -10  -3   25.30    2.10
  -2  10   3   24.70    1.70
   1 -10  -3   25.40    2.10
  -1  10   3   26.70    1.70
   0 -10  -3   -0.20    0.90
   0  10   3    0.00    0.70
  -1 -10  -3   13.10    1.50
   1  10   3   13.90    1.30
  -2 -10  -3    2.10    0.90
   2  10   3    3.50    0.90
  -3 -10  -3   51.09    2.50
   3  10   3   53.19    2.20
  -4 -10  -3   28.50    1.80
   4  10   3   32.00    1.70
  -5 -10  -3    3.70    1.00
  -5 -10  -3    4.20    1.00
   5  10   3    3.80    0.90
  -6 -10  -3   13.90    1.50
  -6 -10  -3   13.40    1.30
   6  10   3   13.30    1.40
  -7 -10  -3    1.40    0.90
  -7 -10  -3    1.60    1.00
  -8 -10  -3  316.27    9.10
  -8 -10  -3  316.07    9.50
  -9 -10  -3   46.70    2.30
  -9 -10  -3   44.90    2.60
 -10 -10  -3    4.80    1.20
 -10 -10  -3    5.20    1.40
 -11 -10  -3   11.20    1.80
 -11 -10  -3    8.90    1.30
  11  10   3    7.00    1.40
 -12 -10  -3   -0.20    1.20
  12  10   3   -0.50    1.50
   3 -11  -3   14.10    2.30
  -3  11   3   13.90    1.70
   2 -11  -3    0.10    1.30
  -2  11   3    0.70    1.10
   1 -11  -3   77.79    3.60
  -1  11   3   87.79    3.30
   0 -11  -3   64.09    3.10
   0  11   3   65.19    2.70
  -1 -11  -3   34.50    2.30
   1  11   3   36.40    2.00
  -2 -11  -3    0.00    0.90
   2  11   3    0.10    0.90
  -3 -11  -3    1.40    1.00
   3  11   3    1.20    0.90
  -4 -11  -3    0.50    1.00
   4  11   3    0.40    0.90
  -5 -11  -3   34.40    2.20
   5  11   3   36.90    2.00
  -6 -11  -3   55.09    2.90
   6  11   3   60.59    2.60
  -7 -11  -3  160.98    5.50
  -8 -11  -3  157.28    5.40
  -9 -11  -3    2.70    1.20
  -9 -11  -3    2.00    1.40
 -10 -11  -3    1.20    1.10
 -10 -11  -3    2.30    1.40
 -11 -11  -3    1.90    1.30
 -12 -11  -3   29.00    2.50
  -2  12   3   14.10    1.80
   1 -12  -3   47.70    3.10
  -1  12   3   52.99    2.70
   0 -12  -3    8.40    1.70
   0  12   3   11.70    1.50
  -1 -12  -3    0.90    1.20
   1  12   3    1.50    1.10
  -2 -12  -3   26.00    2.40
   2  12   3   27.00    1.90
  -3 -12  -3   20.60    2.30
  -4 -12  -3   16.50    2.10
   4  12   3   16.50    1.70
  -5 -12  -3   -0.50    1.30
   5  12   3   -0.60    1.10
  -6 -12  -3    1.00    1.20
   6  12   3    0.50    1.10
  -7 -12  -3   19.50    2.20
  -8 -12  -3   11.10    1.70
  -9 -12  -3    0.60    1.50
 -10 -12  -3    0.40    1.40
   0  13   3    6.60    1.50
  -1 -13  -3    4.00    1.70
   1  13   3    3.90    1.40
  -2 -13  -3   16.30    2.20
   2  13   3   17.90    1.90
  -3 -13  -3    1.20    1.50
   3  13   3    1.10    1.20
  -4 -13  -3    3.20    1.50
   4  13   3    3.80    1.30
  -5 -13  -3    8.20    1.80
   5  13   3   13.10    1.70
  -6 -13  -3    4.00    1.50
   6  13   3    6.00    1.50
  -7 -13  -3   13.60    2.00
   7  13   3   16.50    2.10
  -8 -13  -3   20.50    2.40
  -9 -13  -3    3.50    1.90
 -10 -13  -3    1.10    1.90
   4  14   3   -0.30    1.50
  -5 -14  -3    1.70    1.80
   5  14   3    1.10    1.50
  -6 -14  -3   -0.40    1.70
   6  14   3    0.10    1.40
  -7 -14  -3    4.40    2.10
   7  14   3    5.70    1.80
   8  12  -4    2.20    1.60
  -8 -12   4    5.00    1.80
   7  12  -4   13.20    1.40
  -7 -12   4   17.40    1.90
  -7 -12   4   17.50    2.20
   6  12  -4    0.60    0.80
  -6 -12   4    0.30    1.50
  -6 -12   4    0.20    1.10
   5  12  -4   11.50    1.20
  -5 -12   4   12.20    1.80
  -5 -12   4   11.80    1.40
   4  12  -4    7.30    0.80
  -4 -12   4    7.30    1.20
  -4 -12   4    6.40    1.70
   3  12  -4   10.40    1.00
   3  12  -4   12.80    1.90
  -3 -12   4   13.80    1.40
  -3 -12   4   11.80    1.90
  -3 -12   4    8.80    1.70
   2  12  -4    4.90    1.70
   2  12  -4    3.90    0.60
  -2 -12   4    4.00    1.60
  -2 -12   4    2.80    1.20
  -2 -12   4    3.50    1.90
   1  12  -4    2.10    1.90
  -1 -12   4    1.20    1.70
  -1 -12   4    1.40    1.20
  -1 -12   4    1.50    1.70
 -10 -11   4    0.70    1.50
   9  11  -4   13.50    1.50
  -9 -11   4   14.10    1.90
   8  11  -4    1.40    0.90
  -8 -11   4    2.10    1.10
  -8 -11   4    2.40    1.50
   7  11  -4    0.00    0.70
  -7 -11   4   -0.30    1.10
  -7 -11   4    0.40    1.00
   6  11  -4    1.70    0.80
  -6 -11   4    2.60    1.40
  -6 -11   4    3.30    1.10
   5  11  -4    4.50    0.80
  -5 -11   4    4.50    1.00
  -5 -11   4    6.00    1.40
   4  11  -4   38.20    1.70
  -4 -11   4   45.60    2.00
  -4 -11   4   42.20    2.40
   3  11  -4   14.90    1.00
   3  11  -4   17.00    1.90
  -3 -11   4   17.60    1.90
  -3 -11   4   17.60    1.80
  -3 -11   4   15.60    1.40
   2  11  -4   32.90    2.40
   2  11  -4   29.80    1.30
  -2 -11   4   36.60    2.60
  -2 -11   4   34.40    2.30
  -2 -11   4   33.80    1.90
   1  11  -4   -0.30    1.30
   1  11  -4    0.30    0.40
  -1 -11   4    0.60    1.30
  -1 -11   4    0.50    0.90
  -1 -11   4    0.80    1.30
   0  11  -4   14.70    1.90
   0 -11   4   14.00    2.20
   0 -11   4   13.20    1.30
   0 -11   4   14.60    1.80
  -1  11  -4   27.50    2.70
   1 -11   4   25.60    2.70
   1 -11   4   23.70    1.80
 -11 -10   4   39.60    3.00
  10  10  -4    1.10    1.10
 -10 -10   4    0.60    1.50
   9  10  -4    5.70    1.10
  -9 -10   4    4.50    1.50
   8  10  -4   49.60    2.20
  -8 -10   4   49.99    2.70
  -8 -10   4   53.99    2.40
   7  10  -4    5.00    0.80
  -7 -10   4    6.60    1.10
  -7 -10   4    6.90    1.40
   6  10  -4   13.90    1.20
  -6 -10   4   15.20    1.40
  -6 -10   4   13.30    1.50
   5  10  -4    0.30    0.60
  -5 -10   4    0.80    1.00
  -5 -10   4    0.20    0.70
   4  10  -4   37.50    1.50
  -4 -10   4   43.40    1.80
  -4 -10   4   38.80    2.20
   3  10  -4    1.70    0.50
   3  10  -4    1.40    1.00
  -3 -10   4    1.60    1.10
  -3 -10   4    0.50    1.00
  -3 -10   4    1.40    0.70
   2  10  -4    0.10    0.50
   2  10  -4   -0.30    1.00
  -2 -10   4   -0.30    0.70
  -2 -10   4    0.30    1.00
  -2 -10   4   -0.10    1.20
   1  10  -4   18.00    1.80
   1  10  -4   19.20    0.90
  -1 -10   4   16.70    2.00
  -1 -10   4   19.60    1.80
  -1 -10   4   19.20    1.40
   0  10  -4   32.50    1.10
   0  10  -4   30.00    2.10
   0 -10   4   28.70    2.20
   0 -10   4   30.20    2.10
   0 -10   4   28.90    1.70
  -1  10  -4    7.90    1.50
   1 -10   4    9.20    1.10
   1 -10   4    7.60    1.60
  -2  10  -4   -0.40    1.30
   2 -10   4    0.50    1.40
   2 -10   4    0.50    0.80
  -3  10  -4    0.70    1.50
   3 -10   4    0.20    0.90
   3 -10   4   -0.60    1.80
  11   9  -4    1.20    1.20
 -11  -9   4    1.50    1.50
  10   9  -4    2.10    1.10
 -10  -9   4    1.60    1.40
   9   9  -4    0.80    0.90
  -9  -9   4    1.00    1.10
   8   9  -4   15.90    1.40
  -8  -9   4   15.40    1.50
  -8  -9   4   13.40    1.60
   7   9  -4    4.90    0.80
  -7  -9   4    4.10    1.10
  -7  -9   4    4.10    0.90
   6   9  -4    5.30    0.80
  -6  -9   4    7.90    0.90
  -6  -9   4    7.30    1.20
   5   9  -4    3.40    0.60
  -5  -9   4    5.00    0.80
  -5  -9   4    6.40    1.10
   4   9  -4    3.30    0.60
  -4  -9   4    2.50    0.70
  -4  -9   4    2.50    1.00
  -4  -9   4    2.80    1.00
   3   9  -4   58.99    2.00
   3   9  -4   58.69    2.60
  -3  -9   4   60.09    2.20
  -3  -9   4   55.79    2.50
  -3  -9   4   61.99    2.70
   2   9  -4   49.60    2.40
   2   9  -4   44.00    1.60
  -2  -9   4   49.70    1.90
  -2  -9   4   48.10    2.40
  -2  -9   4   48.10    2.40
   1   9  -4   22.30    0.90
   1   9  -4   24.00    1.70
  -1  -9   4   20.60    1.60
  -1  -9   4   23.00    1.30
  -1  -9   4   19.30    1.80
   0   9  -4    2.10    1.00
   0   9  -4    2.40    0.40
   0  -9   4    1.40    0.60
   0  -9   4    2.60    1.10
  -1   9  -4    0.30    0.90
   1  -9   4   -0.40    1.00
   1  -9   4    0.00    0.60
  -2   9  -4    1.60    1.10
   2  -9   4    0.80    0.70
   2  -9   4    1.80    1.30
  -3   9  -4    2.70    1.50
   3  -9   4    2.70    1.40
   3  -9   4    2.10    0.80
  -4   9  -4    1.80    1.60
   4  -9   4    1.00    1.50
   4  -9   4    1.70    0.90
   5  -9   4    1.20    1.00
  12   8  -4   39.40    2.60
 -12  -8   4   36.80    2.90
  11   8  -4    0.80    1.10
 -11  -8   4    1.10    1.30
  10   8  -4    1.90    1.00
 -10  -8   4    3.20    1.20
   9   8  -4    0.20    0.80
  -9  -8   4    1.20    1.00
  -9  -8   4    1.30    1.00
   8   8  -4   40.60    1.90
  -8  -8   4   39.30    2.10
  -8  -8   4   43.00    1.90
   7   8  -4    6.80    0.80
  -7  -8   4    5.10    1.00
  -7  -8   4    7.10    0.90
   6   8  -4    0.70    0.50
  -6  -8   4    0.50    0.60
  -6  -8   4    1.00    0.80
   5   8  -4   25.60    1.20
  -5  -8   4   25.50    1.60
  -5  -8   4   23.70    1.30
   4   8  -4  151.18    4.50
  -4  -8   4  153.58    4.60
  -4  -8   4  157.58    5.00
  -4  -8   4  164.18    4.90
   3   8  -4    0.70    0.40
   3   8  -4    0.30    0.80
  -3  -8   4    0.60    0.80
  -3  -8   4    1.20    0.80
  -3  -8   4    0.90    0.50
   2   8  -4   13.60    1.30
   2   8  -4   13.50    0.70
  -2  -8   4   11.20    0.90
  -2  -8   4   12.70    1.30
  -2  -8   4   12.20    1.40
   1   8  -4   -0.10    0.80
   1   8  -4    0.10    0.30
  -1  -8   4    0.30    0.50
  -1  -8   4    0.20    0.80
  -1  -8   4   -0.10    0.70
   0   8  -4    7.80    0.50
   0   8  -4    6.20    1.10
   0  -8   4    8.30    0.80
   0  -8   4    7.70    1.20
  -1   8  -4   45.40    1.30
  -1   8  -4   46.50    2.30
   1  -8   4   44.80    2.30
   1  -8   4   41.60    1.70
  -2   8  -4    9.60    1.30
   2  -8   4    8.40    1.50
   2  -8   4    8.50    0.90
  -3   8  -4    7.00    1.30
   3  -8   4    5.30    0.80
   3  -8   4    7.20    1.50
  -4   8  -4    0.30    1.10
   4  -8   4    0.40    1.30
   4  -8   4    0.40    0.70
  -5   8  -4    0.80    1.30
   5  -8   4    0.50    1.40
   5  -8   4    0.90    0.80
  -6   8  -4   20.10    2.40
   6  -8   4   21.10    2.50
   6  -8   4   19.30    1.70
  12   7  -4    1.20    1.50
  12   7  -4    0.80    1.50
 -12  -7   4    0.50    1.60
  11   7  -4    3.40    1.50
  11   7  -4    2.60    1.20
 -11  -7   4    1.90    1.20
  10   7  -4    1.30    0.90
  10   7  -4    2.70    1.30
 -10  -7   4    2.50    1.20
   9   7  -4    0.10    1.00
   9   7  -4    0.30    0.70
  -9  -7   4   -0.10    0.70
  -9  -7   4   -0.60    0.80
   8   7  -4  110.89    3.60
   8   7  -4  105.19    3.70
  -8  -7   4  106.39    3.80
  -8  -7   4  112.29    3.50
   7   7  -4   22.30    1.30
  -7  -7   4   24.30    1.60
  -7  -7   4   25.30    1.30
   6   7  -4  118.39    3.50
  -6  -7   4  110.79    3.50
  -6  -7   4  105.79    3.70
   5   7  -4  123.99    3.60
  -5  -7   4  117.69    3.60
  -5  -7   4  120.99    4.00
   4   7  -4   33.80    1.30
  -4  -7   4   32.90    1.70
  -4  -7   4   36.40    1.60
  -4  -7   4   34.40    1.40
   3   7  -4  130.29    3.70
   3   7  -4  132.89    4.20
  -3  -7   4  128.59    4.10
  -3  -7   4  133.39    3.80
  -3  -7   4  126.19    4.20
   2   7  -4  151.38    4.20
   2   7  -4  154.08    4.80
  -2  -7   4  151.88    4.70
  -2  -7   4  152.58    4.40
  -2  -7   4  149.39    4.70
   1   7  -4   67.19    2.00
   1   7  -4   72.19    2.70
  -1  -7   4   68.09    2.20
  -1  -7   4   67.09    2.60
  -1  -7   4   70.19    2.60
   0   7  -4    7.40    0.40
   0   7  -4    7.50    1.10
   0  -7   4    8.00    1.10
   0  -7   4    7.10    0.70
  -1   7  -4    2.80    0.80
  -1   7  -4    4.20    0.30
   1  -7   4    4.10    0.60
   1  -7   4    4.20    0.90
  -2   7  -4  276.37    8.20
   2  -7   4  271.17    8.30
   2  -7   4  280.27    7.70
  -3   7  -4   20.50    1.60
   3  -7   4   23.00    1.20
   3  -7   4   21.50    1.90
  -4   7  -4    4.60    1.10
   4  -7   4    4.00    0.70
   4  -7   4    3.00    1.20
  -5   7  -4   -0.10    1.10
   5  -7   4    0.10    0.70
   5  -7   4   -0.20    1.10
  -6   7  -4    5.80    1.50
   6  -7   4    8.40    1.70
   6  -7   4    7.50    1.10
  -7   7  -4   18.90    2.30
   7  -7   4   17.70    2.40
   7  -7   4   17.20    1.60
  12   6  -4   23.80    2.30
  12   6  -4   20.80    2.30
 -12  -6   4   18.80    2.20
  11   6  -4   12.70    1.70
  11   6  -4   13.50    1.60
 -11  -6   4   17.10    2.00
  10   6  -4    1.20    1.20
  10   6  -4    2.70    1.00
 -10  -6   4    2.40    1.00
   9   6  -4    1.10    1.00
   9   6  -4    1.80    0.80
  -9  -6   4    1.20    0.70
  -9  -6   4    1.50    1.00
   8   6  -4    8.40    1.10
   8   6  -4    7.50    0.90
  -8  -6   4    5.60    0.80
  -8  -6   4    6.50    1.00
   7   6  -4   13.00    1.00
   7   6  -4   10.70    1.20
  -7  -6   4   11.60    1.00
  -7  -6   4   12.10    1.20
   6   6  -4    1.20    0.50
   6   6  -4    1.90    0.70
  -6  -6   4    1.50    0.50
  -6  -6   4    1.40    0.70
   5   6  -4   22.60    1.10
   5   6  -4   20.30    1.20
  -5  -6   4   22.20    1.30
  -5  -6   4   21.90    1.10
   4   6  -4    1.60    0.40
  -4  -6   4    1.50    0.40
  -4  -6   4    1.80    0.60
  -4  -6   4    1.70    0.60
   3   6  -4   42.50    1.40
  -3  -6   4   41.90    1.50
  -3  -6   4   44.60    1.80
  -3  -6   4   38.80    1.70
   2   6  -4   27.80    1.00
   2   6  -4   28.80    1.50
   2   6  -4   28.00    1.00
  -2  -6   4   27.00    1.10
  -2  -6   4   27.10    1.50
  -2  -6   4   25.50    1.30
   1   6  -4    8.10    0.90
   1   6  -4    9.20    0.50
   1   6  -4    9.60    0.50
  -1  -6   4   11.50    1.00
  -1  -6   4    9.50    0.60
  -1  -6   4    7.20    1.00
   0   6  -4   27.60    1.50
   0   6  -4   29.50    0.80
   0   6  -4   29.80    0.80
   0  -6   4   28.80    1.10
   0  -6   4   25.80    1.50
  -1   6  -4    0.70    0.60
   1  -6   4    0.40    0.40
   1  -6   4    0.50    0.70
  -2   6  -4    0.10    0.70
   2  -6   4    0.10    0.70
   2  -6   4    0.20    0.40
  -3   6  -4    0.10    0.70
   3  -6   4    0.10    0.80
   3  -6   4   -0.10    0.40
  -4   6  -4    0.60    0.90
   4  -6   4    0.10    0.50
   4  -6   4    0.00    0.80
  -5   6  -4   19.50    1.60
   5  -6   4   21.00    1.80
   5  -6   4   19.70    1.20
  -6   6  -4   96.29    3.80
   6  -6   4   90.39    3.20
   6  -6   4  100.49    4.10
  -7   6  -4   38.40    2.60
   7  -6   4   47.20    3.00
   7  -6   4   45.10    2.10
  -8   6  -4    3.90    1.70
   8  -6   4    3.80    1.10
   8  -6   4    3.70    1.90
  12   5  -4    0.20    1.40
  12   5  -4    0.00    1.30
 -12  -5   4    0.70    1.40
  11   5  -4    7.40    1.50
  11   5  -4    7.60    1.30
 -11  -5   4    7.70    1.40
  10   5  -4    1.30    1.20
  10   5  -4    1.20    0.90
 -10  -5   4    0.20    0.90
   9   5  -4    9.60    1.10
   9   5  -4    9.50    1.30
  -9  -5   4    8.00    1.10
   8   5  -4    5.10    1.00
   8   5  -4    5.30    0.80
  -8  -5   4    5.30    0.90
  -8  -5   4    4.10    0.70
   7   5  -4    3.60    0.70
   7   5  -4    3.60    0.90
  -7  -5   4    4.10    0.70
  -7  -5   4    3.50    0.80
   6   5  -4    2.40    0.60
   6   5  -4    2.20    0.50
  -6  -5   4    3.20    0.60
  -6  -5   4    3.10    0.70
   5   5  -4   14.90    1.00
   5   5  -4   17.90    0.90
  -5  -5   4   15.70    1.10
  -5  -5   4   14.10    0.90
   4   5  -4   23.30    1.00
   4   5  -4   24.80    1.20
  -4  -5   4   23.10    1.10
  -4  -5   4   24.10    1.00
  -4  -5   4   23.90    1.20
   3   5  -4   45.40    1.40
   3   5  -4   41.20    1.40
   3   5  -4   46.20    1.50
  -3  -5   4   43.10    1.40
  -3  -5   4   44.90    1.70
  -3  -5   4   41.30    1.60
   2   5  -4  239.48    6.30
   2   5  -4  229.18    6.70
   2   5  -4  227.98    6.20
   2   5  -4  237.88    6.20
  -2  -5   4  231.68    6.60
  -2  -5   4  228.98    6.60
  -2  -5   4  225.78    6.30
   1   5  -4  394.16   11.00
   1   5  -4  408.46   10.50
  -1  -5   4  405.76   10.70
  -1  -5   4  392.86   11.00
  -1  -5   4  395.06   11.00
   0   5  -4   78.19    2.70
   0  -5   4   80.19    2.30
   0  -5   4   82.39    2.80
  -1   5  -4   53.89    2.10
   1  -5   4   53.69    1.70
   1  -5   4   50.89    2.10
  -2   5  -4   30.60    1.50
   2  -5   4   28.70    1.60
   2  -5   4   28.50    1.10
  -3   5  -4    3.20    0.80
   3  -5   4    3.00    0.50
   3  -5   4    2.10    0.80
  -4   5  -4   41.20    2.00
   4  -5   4   44.50    1.60
   4  -5   4   44.10    2.10
  -5   5  -4   29.10    1.90
   5  -5   4   30.90    1.40
   5  -5   4   32.40    1.90
  -6   5  -4   10.40    1.30
   6  -5   4   11.50    1.00
   6  -5   4    8.80    1.40
  -7   5  -4    0.10    1.10
   7  -5   4    0.20    1.10
   7  -5   4    0.30    0.70
  -8   5  -4    3.50    1.40
   8  -5   4    2.40    0.90
   8  -5   4    6.70    1.60
   9  -5   4   14.20    1.50
   9  -5   4   16.60    2.40
  12   4  -4   14.60    1.80
  12   4  -4   14.40    2.10
 -12  -4   4    9.30    1.70
  11   4  -4   32.30    2.20
  11   4  -4   32.60    2.30
 -11  -4   4   31.80    2.20
  10   4  -4    0.00    1.00
  10   4  -4    0.30    0.90
 -10  -4   4   -0.20    0.90
   9   4  -4    5.70    1.10
   9   4  -4    5.90    1.00
  -9  -4   4    7.00    1.10
   8   4  -4   11.80    1.10
   8   4  -4   13.90    1.30
  -8  -4   4   12.70    1.20
  -8  -4   4   12.20    1.00
   7   4  -4   13.80    1.00
   7   4  -4   12.90    1.10
  -7  -4   4   12.20    1.10
  -7  -4   4   13.50    0.90
   6   4  -4   18.40    1.00
   6   4  -4   22.50    1.30
  -6  -4   4   18.70    1.00
  -6  -4   4   17.40    1.10
   5   4  -4   12.70    0.90
   5   4  -4   11.50    0.80
  -5  -4   4   12.80    1.00
  -5  -4   4   13.10    0.80
   4   4  -4  251.37    6.70
   4   4  -4  230.88    6.50
  -4  -4   4  232.58    6.50
  -4  -4   4  251.37    6.50
  -4  -4   4  231.58    6.80
   3   4  -4   40.50    1.40
   3   4  -4   41.90    1.30
   3   4  -4   40.60    1.30
  -3  -4   4   37.20    1.30
  -3  -4   4   40.80    1.40
  -3  -4   4   37.90    1.60
   2   4  -4  157.48    4.70
   2   4  -4  166.48    4.30
   2   4  -4  160.58    4.40
   2   4  -4  160.58    4.30
  -2  -4   4  161.28    4.40
  -2  -4   4  152.98    4.50
  -2  -4   4  154.48    4.60
  -2  -4   4  154.88    4.40
   1   4  -4   22.80    0.80
   1   4  -4   21.40    1.10
  -1  -4   4   20.60    0.80
  -1  -4   4   19.90    0.80
  -1  -4   4   20.30    1.00
  -1  -4   4   21.50    1.00
   0   4  -4    0.40    0.40
   0   4  -4    0.50    0.30
   0  -4   4    0.20    0.20
   0  -4   4    0.30    0.40
   0  -4   4    0.20    0.30
   0  -4   4    0.30    0.30
  -1   4  -4  211.38    6.10
   1  -4   4  205.08    6.10
   1  -4   4  214.68    5.70
   1  -4   4  205.18    5.70
   1  -4   4  216.88    5.70
  -2   4  -4    2.00    0.60
   2  -4   4    3.00    0.50
   2  -4   4    1.90    0.30
   2  -4   4    1.70    0.60
  -3   4  -4   90.79    3.20
   3  -4   4   94.99    2.80
   3  -4   4  100.29    3.30
  -4   4  -4   33.90    1.70
   4  -4   4   32.40    1.30
   4  -4   4   36.20    1.80
  -5   4  -4    7.50    1.00
   5  -4   4    8.00    1.10
   5  -4   4    7.90    0.70
  -6   4  -4   -0.10    0.80
  -6   4  -4    0.30    0.20
   6  -4   4    0.00    0.50
   6  -4   4    0.20    0.90
  -7   4  -4    4.10    1.10
  -7   4  -4    4.70    0.50
   7  -4   4    4.90    1.20
   7  -4   4    5.50    0.80
  -8   4  -4   21.50    2.00
  -8   4  -4   20.00    0.90
   8  -4   4   18.90    1.40
   8  -4   4   20.10    2.00
  -9   4  -4    0.10    0.40
  -9   4  -4   -0.70    1.20
   9  -4   4    0.30    1.40
   9  -4   4    0.20    0.90
  10  -4   4    9.40    1.40
  12   3  -4    4.90    1.70
 -12  -3   4    3.80    1.40
  11   3  -4   70.99    3.10
  11   3  -4   79.79    3.60
 -11  -3   4   78.09    3.30
  10   3  -4   32.60    2.10
  10   3  -4   31.80    1.90
 -10  -3   4   36.00    2.00
   9   3  -4    6.10    1.00
   9   3  -4    6.60    1.10
  -9  -3   4    6.00    1.10
   8   3  -4   95.99    3.50
   8   3  -4   98.19    3.20
  -8  -3   4   92.99    3.40
  -8  -3   4  101.39    3.20
   7   3  -4   36.00    1.70
   7   3  -4   35.20    1.50
  -7  -3   4   33.10    1.40
  -7  -3   4   33.70    1.60
   6   3  -4  338.77    9.30
   6   3  -4  339.97    9.50
  -6  -3   4  333.17    9.20
  -6  -3   4  339.37    9.50
   5   3  -4   11.70    0.80
   5   3  -4   15.00    0.90
  -5  -3   4   14.00    0.80
  -5  -3   4   15.70    1.00
   4   3  -4    1.50    0.40
   4   3  -4    0.60    0.30
   4   3  -4    0.90    0.50
  -4  -3   4    0.50    0.60
  -4  -3   4    1.10    0.40
  -4  -3   4    1.00    0.30
  -4  -3   4    0.70    0.30
   3   3  -4   14.10    0.60
   3   3  -4   14.50    0.80
   3   3  -4   15.70    0.70
  -3  -3   4   14.10    0.60
  -3  -3   4   15.60    0.70
  -3  -3   4   12.50    0.80
   2   3  -4  249.48    6.60
   2   3  -4  251.77    6.80
   2   3  -4  247.88    6.60
  -2  -3   4  245.38    6.90
  -2  -3   4  251.27    6.60
  -2  -3   4  240.08    6.60
  -2  -3   4  245.78    6.70
   1   3  -4   32.90    1.30
   1   3  -4   31.40    1.10
  -1  -3   4   33.10    1.20
  -1  -3   4   31.80    1.20
  -1  -3   4   31.20    1.00
  -1  -3   4   30.00    1.00
   0   3  -4   17.30    0.90
   0   3  -4   18.70    0.70
   0  -3   4   16.70    0.60
   0  -3   4   17.10    0.60
   0  -3   4   15.60    0.80
  -1   3  -4   50.29    1.60
  -1   3  -4   50.29    1.80
   1  -3   4   49.60    1.40
   1  -3   4   48.50    1.80
   1  -3   4   49.50    1.50
   1  -3   4   49.50    1.40
  -2   3  -4   55.69    2.00
  -2   3  -4   57.69    2.10
   2  -3   4   55.19    2.10
   2  -3   4   56.69    1.70
   2  -3   4   60.09    1.80
   2  -3   4   58.99    1.70
  -3   3  -4    0.40    0.50
  -3   3  -4    0.20    0.60
   3  -3   4    0.40    0.50
   3  -3   4    0.40    0.40
   3  -3   4    0.00    0.20
  -4   3  -4   24.20    1.40
  -4   3  -4   24.00    1.40
   4  -3   4   24.50    0.90
   4  -3   4   22.00    1.10
   4  -3   4   24.20    1.40
  -5   3  -4   93.79    3.40
  -5   3  -4   96.49    3.30
   5  -3   4   93.09    2.80
   5  -3   4   97.79    3.40
   5  -3   4   95.09    3.00
  -6   3  -4  216.98    6.80
  -6   3  -4  223.38    6.10
  -6   3  -4  235.08    7.00
   6  -3   4  230.68    6.40
   6  -3   4  230.38    7.00
   6  -3   4  229.68    6.60
  -7   3  -4    0.10    0.80
  -7   3  -4    0.40    0.30
   7  -3   4    0.20    0.50
   7  -3   4   -0.20    0.80
  -8   3  -4    3.30    0.50
  -8   3  -4    4.10    1.10
   8  -3   4    2.90    0.70
   8  -3   4    3.80    1.20
  -9   3  -4    2.70    1.30
  -9   3  -4    1.60    0.50
   9  -3   4    1.60    1.20
   9  -3   4    2.40    0.90
 -10   3  -4    0.20    0.50
 -10   3  -4    0.50    1.40
  10  -3   4    0.10    1.00
  10  -3   4   -0.30    1.40
  12   2  -4    2.30    1.60
 -12  -2   4    4.10    1.60
  11   2  -4   -0.10    1.20
  11   2  -4   -0.30    1.40
 -11  -2   4    0.20    1.10
  10   2  -4    2.20    1.10
  10   2  -4    2.10    1.00
 -10  -2   4    3.50    1.10
   9   2  -4    5.60    1.10
   9   2  -4    5.30    1.00
  -9  -2   4    6.10    1.10
   8   2  -4   11.60    1.10
   8   2  -4   11.30    1.30
  -8  -2   4   11.20    1.10
  -8  -2   4   10.70    1.20
   7   2  -4   48.20    2.10
   7   2  -4   47.70    1.90
  -7  -2   4   47.40    1.80
  -7  -2   4   51.09    2.00
   6   2  -4    2.90    0.60
   6   2  -4    2.60    0.70
  -6  -2   4    1.80    0.60
  -6  -2   4    2.30    0.50
   5   2  -4    6.90    0.60
   5   2  -4    8.20    0.80
  -5  -2   4    7.40    0.70
  -5  -2   4    8.30    0.80
  -5  -2   4    6.90    0.60
   4   2  -4   53.39    1.70
   4   2  -4   53.59    1.90
  -4  -2   4   53.79    1.70
  -4  -2   4   53.19    1.90
  -4  -2   4   56.49    1.80
   3   2  -4  511.75   12.90
   3   2  -4  495.55   13.10
   3   2  -4  479.55   12.90
  -3  -2   4  484.55   13.10
  -3  -2   4  463.65   12.90
   2   2  -4    4.80    0.30
   2   2  -4    4.90    0.30
   2   2  -4    4.70    0.50
  -2  -2   4    4.60    0.50
  -2  -2   4    4.20    0.40
  -2  -2   4    4.20    0.30
  -2  -2   4    4.10    0.40
   1   2  -4   72.39    2.10
   1   2  -4   68.29    2.20
  -1  -2   4   68.59    2.20
  -1  -2   4   69.69    1.90
  -1  -2   4   70.79    1.90
  -1  -2   4   71.49    2.10
   0   2  -4    0.10    0.30
   0   2  -4    0.30    0.30
   0   2  -4    0.20    0.30
   0  -2   4    0.10    0.10
   0  -2   4    0.10    0.30
   0  -2   4    0.30    0.10
  -1   2  -4  858.21   23.00
  -1   2  -4  888.21   22.80
  -1   2  -4  858.31   23.00
   1  -2   4  840.12   22.60
   1  -2   4  871.21   22.80
   1  -2   4  868.01   23.00
   1  -2   4  869.51   22.60
  -2   2  -4  234.58    6.70
  -2   2  -4  232.08    6.60
   2  -2   4  241.78    6.20
   2  -2   4  233.28    6.40
   2  -2   4  234.38    6.60
   2  -2   4  231.58    6.20
  -3   2  -4   66.89    2.20
  -3   2  -4   66.69    2.30
   3  -2   4   63.39    2.30
   3  -2   4   65.49    2.10
   3  -2   4   67.29    1.90
   3  -2   4   64.19    1.90
  -4   2  -4  321.27    9.10
  -4   2  -4  331.77    9.30
   4  -2   4  327.37    9.20
   4  -2   4  317.27    8.70
   4  -2   4  336.47    9.00
  -5   2  -4   33.30    1.60
  -5   2  -4   31.60    1.70
  -5   2  -4   33.90    1.00
  -5   2  -4   34.70    1.00
   5  -2   4   33.00    1.20
   5  -2   4   31.70    1.40
   5  -2   4   35.30    1.70
  -6   2  -4  365.96   10.60
  -6   2  -4  361.66   10.40
  -6   2  -4  374.06    9.80
   6  -2   4  368.56   10.00
   6  -2   4  368.46   10.60
   6  -2   4  380.46   10.30
  -7   2  -4  263.97    7.90
  -7   2  -4  259.87    7.60
  -7   2  -4  246.88    6.90
   7  -2   4  256.67    7.70
   7  -2   4  246.68    7.10
   7  -2   4  263.17    7.40
  -8   2  -4  118.59    4.50
  -8   2  -4  121.29    3.50
  -8   2  -4  120.79    4.30
   8  -2   4  132.29    4.20
   8  -2   4  121.89    4.50
   8  -2   4  127.39    3.80
  -9   2  -4    7.70    0.80
  -9   2  -4    8.70    1.40
  -9   2  -4    7.50    1.40
   9  -2   4    7.30    1.40
   9  -2   4    6.50    1.40
   9  -2   4    7.80    0.90
 -10   2  -4    0.00    1.20
 -10   2  -4    0.20    0.60
  10  -2   4    0.20    0.80
  10  -2   4    0.30    1.40
 -11   2  -4   22.90    2.70
 -11   2  -4   20.20    1.20
  11  -2   4   21.30    2.00
  11  -2   4   21.30    2.80
  12   1  -4   48.90    3.20
 -12  -1   4   50.19    3.00
  11   1  -4    1.00    1.50
 -11  -1   4    0.20    1.20
  10   1  -4   20.00    1.80
  10   1  -4   20.90    1.70
 -10  -1   4   17.10    1.70
   9   1  -4   -0.30    0.90
   9   1  -4    0.70    0.90
  -9  -1   4    0.10    0.80
   8   1  -4  171.58    5.50
   8   1  -4  174.98    5.30
  -8  -1   4  172.78    5.40
   7   1  -4  219.88    6.30
   7   1  -4  220.98    6.60
  -7  -1   4  219.38    6.50
  -7  -1   4  219.28    6.20
   6   1  -4   24.10    1.20
   6   1  -4   30.20    1.50
  -6  -1   4   29.90    1.20
  -6  -1   4   26.10    1.30
  -6  -1   4   26.40    1.50
   5   1  -4   42.10    1.70
   5   1  -4   43.20    1.60
  -5  -1   4   45.50    1.50
  -5  -1   4   43.00    1.70
  -5  -1   4   46.10    1.70
   4   1  -4    1.80    0.40
   4   1  -4    3.90    0.60
  -4  -1   4    2.30    0.50
  -4  -1   4    3.70    0.40
  -4  -1   4    2.70    0.50
   3   1  -4  565.14   15.10
   3   1  -4  561.24   15.30
  -3  -1   4  571.64   15.10
  -3  -1   4  580.44   15.20
   2   1  -4  958.20   25.40
   2   1  -4  995.20   25.40
   2   1  -4  985.00   25.70
  -2  -1   4  949.40   25.60
  -2  -1   4  959.60   25.40
   1   1  -4  137.69    3.70
   1   1  -4  135.89    3.80
  -1  -1   4  130.89    3.60
  -1  -1   4  133.99    3.60
  -1  -1   4  136.39    3.70
  -1  -1   4  129.49    3.80
   0   1  -4   16.40    0.70
   0   1  -4   16.60    0.70
   0   1  -4   16.40    0.70
   0  -1   4   15.80    0.70
  -1   1  -4  297.47    8.10
  -1   1  -4  294.17    8.10
  -1   1  -4  302.07    8.10
  -2   1  -4  417.06   11.30
  -2   1  -4  411.36   11.20
  -2   1  -4  410.46   11.10
   2  -1   4  406.56   11.10
   2  -1   4  422.76   10.80
   2  -1   4  414.16   10.80
  -3   1  -4  272.17    7.50
  -3   1  -4  278.37    7.60
   3  -1   4  259.27    7.40
   3  -1   4  270.87    7.20
   3  -1   4  270.97    7.20
  -4   1  -4   63.79    2.30
  -4   1  -4   59.69    2.10
   4  -1   4   61.79    1.80
   4  -1   4   58.79    2.00
   4  -1   4   62.09    1.80
  -5   1  -4   29.50    1.40
  -5   1  -4   30.60    0.90
  -5   1  -4   33.00    0.90
  -5   1  -4   28.00    1.50
   5  -1   4   27.60    1.30
   5  -1   4   29.10    1.10
   5  -1   4   30.90    1.50
  -6   1  -4  434.56   11.70
  -6   1  -4  461.55   11.70
  -6   1  -4  435.46   12.40
  -6   1  -4  421.06   12.20
   6  -1   4  433.36   11.80
   6  -1   4  453.65   12.20
   6  -1   4  452.05   12.40
  -7   1  -4  380.36   10.10
  -7   1  -4  385.56   10.60
  -7   1  -4  357.26   10.80
   7  -1   4  383.06   10.20
   7  -1   4  369.66   10.50
   7  -1   4  378.76   10.80
  -8   1  -4   30.30    1.20
  -8   1  -4   27.90    1.90
  -8   1  -4   31.60    1.80
   8  -1   4   30.70    1.80
   8  -1   4   31.10    1.40
   8  -1   4   33.60    1.90
  -9   1  -4    3.50    1.00
  -9   1  -4    3.00    1.10
  -9   1  -4    4.30    0.60
   9  -1   4    5.00    1.20
   9  -1   4    4.00    1.10
   9  -1   4    5.00    0.80
 -10   1  -4    0.30    1.40
 -10   1  -4    1.60    1.10
 -10   1  -4    1.10    0.60
  10  -1   4    0.60    1.10
  10  -1   4    0.90    0.80
  10  -1   4    2.20    1.40
 -11   1  -4    1.30    0.60
 -11   1  -4    3.80    1.60
 -11   1  -4    1.80    1.40
  11  -1   4    1.60    1.50
  11  -1   4    2.20    1.40
  11  -1   4    2.40    1.10
  11   0  -4   -0.40    1.40
 -11   0   4    0.10    1.30
  10   0  -4    9.40    1.50
 -10   0   4   11.00    1.50
   9   0  -4    9.70    1.30
   9   0  -4    9.30    1.30
  -9   0   4    9.20    1.30
   8   0  -4  164.68    5.50
   8   0  -4  175.28    5.30
  -8   0   4  176.48    5.40
   7   0  -4  205.58    6.00
   7   0  -4  194.88    6.10
  -7   0   4  213.98    5.90
  -7   0   4  196.48    6.10
   6   0  -4   64.09    2.30
   6   0  -4   64.29    2.50
  -6   0   4   66.99    2.30
  -6   0   4   65.39    2.40
  -6   0   4   70.09    2.20
   5   0  -4  158.68    4.80
   5   0  -4  156.68    4.50
  -5   0   4  157.38    4.50
  -5   0   4  155.38    4.60
   4   0  -4    2.70    0.40
   4   0  -4    3.10    0.30
   4   0  -4    3.70    0.50
   4   0  -4    2.40    0.50
  -4   0   4    3.40    0.50
  -4   0   4    3.60    0.40
  -4   0   4    2.50    0.50
   3   0  -4  316.57    8.50
   3   0  -4  315.47    8.70
  -3   0   4  310.37    8.50
  -3   0   4  309.77    8.60
  -3   0   4  330.57    8.60
   2   0  -4  489.55   12.90
   2   0  -4  489.95   13.10
   2   0  -4  490.85   12.90
   2   0  -4  494.55   12.90
  -2   0   4  493.35   13.00
  -2   0   4  470.35   12.90
   1   0  -4   24.10    0.70
   1   0  -4   22.40    1.00
   1   0  -4   24.70    0.80
   1   0  -4   24.60    0.70
  -1   0   4   21.90    0.90
  -1   0   4   23.50    0.80
  -1   0   4   22.50    0.70
   0   0  -4  294.77    8.00
   0   0  -4  296.67    8.00
   0   0  -4  300.97    8.10
   0   0   4  296.97    7.80
   0   0   4  295.37    8.00
   0   0   4  295.97    7.80
  -1   0  -4  131.89    3.70
  -1   0  -4  133.99    3.80
  -1   0  -4  131.79    3.80
  -2   0  -4   31.40    1.20
  -2   0  -4   30.20    1.10
  -2   0  -4   30.40    1.10
   2   0   4   30.40    1.10
  -3   0  -4    1.20    0.30
  -3   0  -4    1.10    0.40
   3   0   4    1.40    0.20
   3   0   4    1.20    0.40
   3   0   4    1.40    0.20
  -4   0  -4   22.60    1.00
  -4   0  -4   22.20    1.20
   4   0   4   22.20    0.80
   4   0   4   24.30    0.80
   4   0   4   22.20    1.00
  -5   0  -4   16.30    1.10
  -5   0  -4   22.00    0.70
  -5   0  -4   21.90    0.70
  -5   0  -4   22.60    1.10
   5   0   4   19.40    1.00
   5   0   4   20.70    0.80
  -6   0  -4   81.29    3.00
  -6   0  -4   92.69    2.50
  -6   0  -4   84.79    2.90
  -6   0  -4   85.39    2.50
   6   0   4   84.99    2.60
   6   0   4   86.29    2.90
  -7   0  -4   50.89    2.30
  -7   0  -4   50.99    1.60
  -7   0  -4   49.40    2.00
   7   0   4   50.19    2.00
   7   0   4   48.80    1.70
  -8   0  -4    2.30    0.90
  -8   0  -4    3.10    0.50
  -8   0  -4    2.70    0.80
   8   0   4    3.90    0.60
   8   0   4    3.80    0.90
   8   0   4    3.20    0.90
  -9   0  -4    7.40    1.10
  -9   0  -4    9.60    0.80
  -9   0  -4    8.00    1.30
   9   0   4    8.50    0.90
   9   0   4   10.70    1.30
   9   0   4    9.40    1.30
 -10   0  -4   13.30    1.60
 -10   0  -4   16.00    1.00
 -10   0  -4   20.60    1.90
  10   0   4   16.90    1.80
  10   0   4   16.00    1.30
  10   0   4   15.50    1.70
 -11   0  -4   27.50    2.60
 -11   0  -4   23.10    1.30
 -11   0  -4   26.10    2.10
  11   0   4   26.90    1.80
  11   0   4   23.30    2.30
  11   0   4   22.30    2.40
 -12   0  -4   18.60    2.40
 -12   0  -4   18.90    2.20
 -12   0  -4   17.60    1.30
  12   0   4   20.30    2.40
  12   0   4   19.10    2.40
  12   0   4   19.20    2.00
  11  -1  -4    0.80    1.50
 -11   1   4    1.00    1.60
  10  -1  -4    7.00    1.50
 -10   1   4    5.60    1.40
   9  -1  -4    0.00    1.10
  -9   1   4   -0.10    0.90
   8  -1  -4    0.60    0.90
   8  -1  -4    0.70    0.90
  -8   1   4    1.30    0.80
   7  -1  -4    0.50    0.70
   7  -1  -4    0.10    0.70
  -7   1   4    0.60    0.70
  -7   1   4   -0.50    0.70
   6  -1  -4    5.00    0.80
   6  -1  -4    6.00    0.80
  -6   1   4    4.80    0.60
  -6   1   4    4.80    0.80
  -6   1   4    4.60    0.80
   5  -1  -4    0.80    0.50
   5  -1  -4    1.10    0.50
   5  -1  -4    1.30    0.40
  -5   1   4    1.10    0.40
  -5   1   4    0.90    0.50
  -5   1   4    0.50    0.50
   4  -1  -4   41.60    1.30
   4  -1  -4   36.80    1.40
   4  -1  -4   38.10    1.60
   4  -1  -4   37.90    1.40
  -4   1   4   39.20    1.50
  -4   1   4   40.70    1.40
  -4   1   4   38.70    1.50
   3  -1  -4    0.80    0.40
   3  -1  -4    0.50    0.30
   3  -1  -4    0.20    0.30
   3  -1  -4    0.80    0.30
  -3   1   4    0.40    0.30
  -3   1   4    0.40    0.30
  -3   1   4    0.30    0.30
   2  -1  -4  171.18    5.00
   2  -1  -4  173.78    4.80
   2  -1  -4  183.18    4.80
  -2   1   4  167.28    4.90
  -2   1   4  187.68    5.00
  -2   1   4  175.28    4.80
   1  -1  -4    9.70    0.40
   1  -1  -4    9.80    0.50
   1  -1  -4    9.60    0.50
   1  -1  -4    8.00    0.60
  -1   1   4    8.10    0.50
  -1   1   4    9.20    0.40
   0  -1  -4   85.29    2.30
   0  -1  -4   88.89    2.30
   0  -1  -4   86.59    2.50
   0   1   4   83.69    2.30
   0   1   4   82.99    2.30
   0   1   4   86.49    2.40
  -1  -1  -4  534.85   14.10
  -1  -1  -4  529.65   13.90
  -1  -1  -4  530.95   14.00
   1   1   4  541.15   13.80
   1   1   4  525.75   13.90
   1   1   4  503.85   13.80
  -2  -1  -4   94.29    2.70
  -2  -1  -4   90.89    2.60
  -2  -1  -4   90.89    2.80
   2   1   4   94.19    2.50
   2   1   4   91.19    2.50
  -3  -1  -4   15.20    0.80
  -3  -1  -4   14.10    0.70
  -3  -1  -4   14.70    0.70
   3   1   4   11.00    0.70
   3   1   4   13.50    0.50
   3   1   4   13.00    0.50
  -4  -1  -4  315.57    8.20
  -4  -1  -4  309.67    8.70
  -4  -1  -4  310.47    8.20
  -4  -1  -4  316.07    8.50
   4   1   4  308.37    8.60
   4   1   4  311.17    8.30
   4   1   4  315.27    8.30
  -5  -1  -4  229.08    6.40
  -5  -1  -4  239.68    6.10
  -5  -1  -4  216.08    6.60
  -5  -1  -4  229.58    6.10
   5   1   4  238.18    6.20
   5   1   4  227.68    6.20
   5   1   4  217.88    6.40
  -6  -1  -4    0.20    0.50
  -6  -1  -4    0.00    0.30
  -6  -1  -4    0.10    0.50
  -6  -1  -4    0.00    0.20
   6   1   4    0.20    0.50
   6   1   4    0.00    0.30
  -7  -1  -4   50.99    1.90
  -7  -1  -4   48.50    2.10
  -7  -1  -4   47.80    1.60
   7   1   4   47.10    1.60
   7   1   4   49.70    2.00
  -8  -1  -4    0.50    0.40
  -8  -1  -4    0.40    0.60
  -8  -1  -4    0.20    0.80
   8   1   4    0.20    0.40
   8   1   4    0.80    0.70
  -9  -1  -4   60.89    2.70
  -9  -1  -4   58.49    2.00
  -9  -1  -4   62.89    2.50
   9   1   4   59.19    2.10
   9   1   4   58.99    2.50
 -10  -1  -4   48.20    1.80
 -10  -1  -4   48.00    2.30
 -10  -1  -4   48.80    2.60
  10   1   4   48.70    2.00
  10   1   4   50.39    2.40
  10   1   4   47.80    2.50
 -11  -1  -4   12.70    1.90
 -11  -1  -4   13.10    1.60
 -11  -1  -4   12.30    1.10
  11   1   4   11.10    1.70
  11   1   4   15.10    1.40
  11   1   4   15.60    1.80
 -12  -1  -4   36.30    2.50
 -12  -1  -4   44.10    3.10
 -12  -1  -4   38.10    1.80
  12   1   4   37.70    2.90
  12   1   4   39.40    2.20
  12   1   4   36.60    2.60
  11  -2  -4    3.60    1.80
 -11   2   4    3.70    1.90
  10  -2  -4    0.60    1.40
 -10   2   4    0.70    1.30
   9  -2  -4   50.29    2.70
  -9   2   4   46.20    2.40
   8  -2  -4    4.60    1.10
   8  -2  -4    3.90    1.00
  -8   2   4    5.00    1.00
  -8   2   4    3.80    1.10
   7  -2  -4   36.80    1.90
   7  -2  -4   37.60    1.90
  -7   2   4   37.70    1.80
  -7   2   4   39.00    1.90
   6  -2  -4   35.50    1.70
   6  -2  -4   37.50    1.80
  -6   2   4   38.50    1.70
  -6   2   4   40.70    1.80
   5  -2  -4   33.10    1.50
   5  -2  -4   31.50    1.60
   5  -2  -4   38.60    1.40
  -5   2   4   35.20    1.60
  -5   2   4   31.60    1.40
  -5   2   4   34.10    1.40
   4  -2  -4    6.50    0.70
   4  -2  -4    6.60    0.80
   4  -2  -4    7.30    0.70
   4  -2  -4    8.30    0.70
  -4   2   4    8.00    0.80
  -4   2   4    6.80    0.70
  -4   2   4    7.80    0.60
   3  -2  -4    0.10    0.30
   3  -2  -4   -0.20    0.40
   3  -2  -4    0.00    0.30
   3  -2  -4    0.00    0.30
  -3   2   4    0.20    0.30
  -3   2   4    0.20    0.40
  -3   2   4    0.00    0.30
   2  -2  -4  341.97    9.40
   2  -2  -4  331.57    9.10
   2  -2  -4  333.07    9.20
   2  -2  -4  343.87    9.20
  -2   2   4  361.76    9.20
  -2   2   4  338.67    9.20
  -2   2   4  340.57    9.20
   1  -2  -4   14.10    0.60
   1  -2  -4   14.60    0.80
   1  -2  -4   12.80    0.60
  -1   2   4   13.90    0.60
  -1   2   4   13.20    0.60
   0  -2  -4  640.34   17.10
   0  -2  -4  667.13   17.30
   0  -2  -4  652.73   17.20
   0  -2  -4  619.74   17.30
   0   2   4  649.34   17.10
   0   2   4  680.53   17.10
  -1  -2  -4  164.48    4.80
  -1  -2  -4  168.68    4.50
  -1  -2  -4  181.18    4.60
  -1  -2  -4  166.08    4.70
   1   2   4  170.98    4.60
   1   2   4  172.18    4.50
   1   2   4  165.18    4.60
  -2  -2  -4  156.18    4.50
  -2  -2  -4  163.18    4.30
  -2  -2  -4  164.58    4.30
  -2  -2  -4  164.48    4.30
  -2  -2  -4  152.88    4.50
   2   2   4  159.48    4.30
   2   2   4  160.88    4.30
  -3  -2  -4  636.44   17.10
  -3  -2  -4  650.93   16.80
  -3  -2  -4  631.34   16.80
  -3  -2  -4  649.74   16.90
  -3  -2  -4  630.44   17.10
   3   2   4  658.23   16.90
   3   2   4  627.34   17.10
  -4  -2  -4  190.98    5.30
  -4  -2  -4  191.88    5.10
  -4  -2  -4  198.28    5.20
  -4  -2  -4  197.68    5.50
   4   2   4  188.88    5.40
   4   2   4  184.78    5.20
   4   2   4  191.68    5.20
  -5  -2  -4    8.80    0.80
  -5  -2  -4    9.10    0.70
  -5  -2  -4   10.50    0.60
  -5  -2  -4   10.80    0.50
   5   2   4   10.20    0.50
   5   2   4    8.80    0.70
  -6  -2  -4  118.79    4.00
  -6  -2  -4  132.69    3.80
  -6  -2  -4  127.79    3.70
  -6  -2  -4  127.29    3.50
   6   2   4  126.99    3.60
   6   2   4  121.79    3.90
  -7  -2  -4    0.00    0.30
  -7  -2  -4    0.30    0.60
  -7  -2  -4    0.20    0.50
   7   2   4   -0.10    0.50
   7   2   4    0.10    0.30
  -8  -2  -4   93.69    2.80
  -8  -2  -4   95.29    3.20
  -8  -2  -4   97.29    3.40
   8   2   4   93.99    3.20
   8   2   4   89.89    2.90
  -9  -2  -4   13.90    0.90
  -9  -2  -4   13.10    1.40
  -9  -2  -4   12.70    1.30
   9   2   4   13.10    1.30
   9   2   4   12.40    1.00
 -10  -2  -4   49.50    2.60
 -10  -2  -4   48.50    1.80
 -10  -2  -4   47.10    2.30
  10   2   4   45.90    2.30
  10   2   4   47.90    2.00
 -11  -2  -4    2.60    1.30
 -11  -2  -4    1.80    1.10
 -11  -2  -4    2.50    0.70
  11   2   4    2.30    1.30
  11   2   4    2.40    0.80
 -12  -2  -4    0.70    1.60
 -12  -2  -4    0.70    0.70
 -12  -2  -4    0.50    1.40
  12   2   4    0.80    1.00
  12   2   4   -0.70    1.40
  12   2   4    0.90    1.50
 -13  -2  -4   10.30    2.10
  13   2   4   10.30    2.00
  13   2   4   12.70    2.90
  13   2   4   11.80    3.50
  10  -3  -4   31.70    2.80
 -10   3   4   22.20    2.30
 -10   3   4   25.90    2.60
   9  -3  -4   25.00    2.10
  -9   3   4   25.80    2.10
  -9   3   4   24.90    1.90
   8  -3  -4    6.10    1.30
  -8   3   4    4.80    1.10
  -8   3   4    5.70    1.10
   7  -3  -4    4.10    1.00
   7  -3  -4    5.40    1.10
  -7   3   4    3.90    1.00
  -7   3   4    2.80    0.90
   6  -3  -4  186.68    5.80
   6  -3  -4  196.78    6.00
  -6   3   4  192.18    5.80
  -6   3   4  196.28    5.80
   5  -3  -4   93.69    3.20
   5  -3  -4   95.09    3.10
   5  -3  -4   95.39    3.10
  -5   3   4   89.59    2.90
  -5   3   4   90.79    3.10
  -5   3   4   92.09    3.00
   4  -3  -4    2.90    0.60
   4  -3  -4    2.50    0.70
   4  -3  -4    1.70    0.50
  -4   3   4    1.90    0.50
  -4   3   4    1.80    0.50
  -4   3   4    1.70    0.60
   3  -3  -4   17.90    0.90
   3  -3  -4   16.20    0.90
   3  -3  -4   18.20    0.90
   3  -3  -4   16.00    1.00
  -3   3   4   17.00    0.80
  -3   3   4   16.60    0.90
  -3   3   4   15.50    0.90
   2  -3  -4  166.48    4.90
   2  -3  -4  164.28    4.80
   2  -3  -4  172.68    4.70
   2  -3  -4  168.18    4.80
  -2   3   4  166.18    4.70
  -2   3   4  173.68    4.80
  -2   3   4  165.78    4.70
   1  -3  -4    1.40    0.40
   1  -3  -4    1.10    0.30
   1  -3  -4    1.70    0.30
   1  -3  -4    1.00    0.40
  -1   3   4    1.70    0.40
  -1   3   4    1.70    0.30
  -1   3   4    1.50    0.30
   0  -3  -4  426.86   11.40
   0  -3  -4  416.36   11.20
   0  -3  -4  402.36   11.30
   0   3   4  430.16   11.20
   0   3   4  410.76   11.20
   0   3   4  434.46   11.10
  -1  -3  -4   94.39    2.70
  -1  -3  -4   96.09    2.90
  -1  -3  -4   96.09    2.90
   1   3   4   94.09    2.70
  -2  -3  -4  481.25   12.80
  -2  -3  -4  479.55   12.80
  -2  -3  -4  459.35   12.60
  -2  -3  -4  487.55   12.60
   2   3   4  466.75   12.50
  -3  -3  -4   20.40    0.70
  -3  -3  -4   18.80    0.90
  -3  -3  -4   19.70    0.70
  -3  -3  -4   17.30    0.90
  -3  -3  -4   18.70    0.70
   3   3   4   18.30    0.70
   3   3   4   18.30    0.90
  -4  -3  -4  201.38    5.30
  -4  -3  -4  201.08    5.70
  -4  -3  -4  194.28    5.30
  -4  -3  -4  198.98    5.30
  -4  -3  -4  191.88    5.60
   4   3   4  193.18    5.30
   4   3   4  188.48    5.50
  -5  -3  -4   18.20    0.80
  -5  -3  -4   15.50    1.00
  -5  -3  -4   19.20    0.80
  -5  -3  -4   16.90    0.70
   5   3   4   16.50    0.90
   5   3   4   16.60    0.70
  -6  -3  -4   12.30    0.60
  -6  -3  -4   11.50    1.00
  -6  -3  -4   13.00    0.80
   6   3   4    9.70    0.80
   6   3   4   13.10    0.70
  -7  -3  -4    8.00    0.60
  -7  -3  -4    5.80    0.90
  -7  -3  -4    6.10    0.70
   7   3   4    6.20    0.60
   7   3   4    5.90    0.80
  -8  -3  -4   28.40    1.40
  -8  -3  -4   28.90    1.20
  -8  -3  -4   32.20    1.70
   8   3   4   29.60    1.20
   8   3   4   28.40    1.60
  -9  -3  -4   74.19    2.40
  -9  -3  -4   73.39    2.70
  -9  -3  -4   69.99    2.90
   9   3   4   70.79    2.40
   9   3   4   75.39    2.80
 -10  -3  -4    0.40    1.10
 -10  -3  -4    1.20    0.60
 -10  -3  -4    0.30    0.90
  10   3   4    0.40    0.90
  10   3   4    1.00    0.60
 -11  -3  -4    0.60    1.00
 -11  -3  -4    0.90    0.60
 -11  -3  -4    1.50    1.20
  11   3   4    1.20    0.80
  11   3   4    1.40    1.10
 -12  -3  -4    8.30    1.00
 -12  -3  -4    9.70    1.80
 -12  -3  -4    8.70    1.50
  12   3   4    7.70    1.20
  12   3   4   12.80    1.70
 -13  -3  -4   32.40    1.90
 -13  -3  -4   34.90    2.80
  13   3   4   32.80    2.70
  10  -4  -4    1.50    1.80
 -10   4   4    0.80    1.80
 -10   4   4    0.90    1.50
   9  -4  -4    2.10    1.60
  -9   4   4    2.10    1.30
  -9   4   4    2.20    1.50
   8  -4  -4    0.90    1.10
  -8   4   4    0.20    1.00
  -8   4   4    0.50    1.10
   7  -4  -4    0.30    1.00
  -7   4   4    0.10    1.00
  -7   4   4   -0.30    0.80
   6  -4  -4   30.80    1.90
   6  -4  -4   33.30    1.80
  -6   4   4   30.80    1.70
  -6   4   4   32.90    1.70
   5  -4  -4   94.09    3.20
   5  -4  -4   94.59    3.20
   5  -4  -4   98.79    3.30
  -5   4   4   92.79    3.20
  -5   4   4   93.19    3.10
   4  -4  -4    2.40    0.70
   4  -4  -4    2.30    0.70
   4  -4  -4    1.70    0.60
  -4   4   4    1.90    0.60
  -4   4   4    1.80    0.60
  -4   4   4    2.00    0.70
   3  -4  -4   19.10    1.10
   3  -4  -4   22.30    1.10
   3  -4  -4   20.00    1.10
   3  -4  -4   18.70    1.10
  -3   4   4   18.50    1.00
  -3   4   4   21.30    1.00
   2  -4  -4    0.50    0.40
   2  -4  -4    0.40    0.40
   2  -4  -4    0.80    0.50
   2  -4  -4    1.20    0.40
  -2   4   4    0.40    0.40
  -2   4   4    0.80    0.40
  -2   4   4    0.50    0.30
   1  -4  -4  191.28    5.00
   1  -4  -4  175.08    5.10
   1  -4  -4  177.98    5.10
   1  -4  -4  174.38    5.00
  -1   4   4  179.18    5.00
  -1   4   4  174.68    5.00
  -1   4   4  178.88    5.10
   0  -4  -4  994.70   27.30
   0  -4  -4 1014.90   27.40
   0  -4  -4 1031.30   27.20
   0  -4  -4 1027.10   27.40
   0   4   4 1028.10   27.20
   0   4   4 1088.69   27.20
   0   4   4 1051.79   27.30
  -1  -4  -4  142.19    4.20
  -1  -4  -4  150.68    4.30
  -1  -4  -4  154.38    4.40
   1   4   4  145.99    4.20
   1   4   4  153.08    4.00
   1   4   4  154.98    4.20
  -2  -4  -4  118.79    3.60
  -2  -4  -4  117.69    3.50
   2   4   4  126.99    3.50
   2   4   4  117.89    3.40
  -3  -4  -4    4.60    0.60
  -3  -4  -4    4.20    0.30
  -3  -4  -4    3.70    0.60
  -3  -4  -4    3.90    0.40
   3   4   4    4.70    0.50
   3   4   4    4.70    0.40
   3   4   4    4.40    0.50
  -4  -4  -4  103.09    3.10
  -4  -4  -4  106.09    3.30
  -4  -4  -4  111.29    3.00
  -4  -4  -4  111.69    3.40
   4   4   4  109.29    3.10
   4   4   4  111.49    3.30
  -5  -4  -4   24.50    1.00
  -5  -4  -4   24.70    1.00
  -5  -4  -4   21.20    1.20
   5   4   4   28.10    1.20
   5   4   4   25.80    1.00
   5   4   4   25.40    1.20
  -6  -4  -4   38.70    1.70
  -6  -4  -4   40.80    1.40
  -6  -4  -4   38.00    1.40
   6   4   4   39.70    1.40
   6   4   4   37.80    1.60
  -7  -4  -4    7.80    0.70
  -7  -4  -4    7.10    0.80
  -7  -4  -4    7.30    1.00
   7   4   4   10.00    1.00
   7   4   4    8.70    0.70
  -8  -4  -4  110.69    3.40
  -8  -4  -4  111.49    3.60
  -8  -4  -4  114.79    3.90
   8   4   4  113.89    3.70
   8   4   4  115.59    3.40
  -9  -4  -4  102.79    3.20
  -9  -4  -4   98.09    3.30
  -9  -4  -4  101.89    3.60
   9   4   4  103.79    3.20
   9   4   4  103.29    3.60
 -10  -4  -4    0.50    1.00
 -10  -4  -4    0.00    0.50
 -10  -4  -4   -0.30    0.80
  10   4   4   -0.30    0.80
  10   4   4   -0.10    0.60
 -11  -4  -4    5.10    0.80
 -11  -4  -4    5.60    1.40
 -11  -4  -4    7.10    1.30
  11   4   4    5.50    1.00
  11   4   4    4.40    1.10
 -12  -4  -4    0.50    0.80
 -12  -4  -4    0.50    1.20
 -12  -4  -4    0.00    1.40
  12   4   4    1.00    1.30
  12   4   4    0.30    0.90
 -13  -4  -4   12.90    1.90
 -13  -4  -4   14.00    1.50
  13   4   4   12.80    1.90
  -9   5   4   12.00    2.00
  -9   5   4    9.60    1.70
   8  -5  -4    0.80    1.40
  -8   5   4   -0.90    1.10
  -8   5   4   -0.10    1.30
   7  -5  -4   41.90    2.20
  -7   5   4   37.70    2.20
  -7   5   4   38.50    2.10
   6  -5  -4    8.40    1.50
   6  -5  -4    9.50    1.30
  -6   5   4   12.20    1.30
  -6   5   4   11.80    1.40
   5  -5  -4    5.00    1.00
   5  -5  -4    4.60    1.00
   5  -5  -4    3.80    1.00
  -5   5   4    3.20    0.80
  -5   5   4    4.60    0.90
   4  -5  -4    0.30    0.60
   4  -5  -4    0.30    0.60
   4  -5  -4    0.60    0.70
  -4   5   4    0.00    0.70
  -4   5   4    0.30    0.70
   3  -5  -4  186.18    5.40
   3  -5  -4  181.18    5.40
   3  -5  -4  178.08    5.40
  -3   5   4  177.58    5.30
  -3   5   4  181.08    5.20
  -3   5   4  180.18    5.30
   2  -5  -4    0.00    0.40
   2  -5  -4    0.20    0.50
   2  -5  -4    0.30    0.50
  -2   5   4   -0.10    0.50
  -2   5   4    0.10    0.40
  -2   5   4   -0.10    0.40
   1  -5  -4  138.09    3.80
   1  -5  -4  129.49    3.90
   1  -5  -4  136.59    4.10
   1  -5  -4  127.59    3.90
  -1   5   4  132.59    3.90
  -1   5   4  129.79    3.80
  -1   5   4  134.69    3.80
   0  -5  -4  625.84   16.70
   0  -5  -4  621.44   16.50
   0  -5  -4  613.34   16.60
   0  -5  -4  615.54   16.80
   0   5   4  627.74   16.60
   0   5   4  621.74   16.70
   0   5   4  632.14   16.50
  -1  -5  -4    8.70    0.80
  -1  -5  -4    8.10    0.60
  -1  -5  -4    9.90    0.60
  -1  -5  -4    7.80    0.70
   1   5   4    8.30    0.50
   1   5   4    7.40    0.70
   1   5   4    8.90    0.60
  -2  -5  -4  259.07    7.20
  -2  -5  -4  253.87    7.00
  -2  -5  -4  257.97    6.70
  -2  -5  -4  261.27    6.90
  -2  -5  -4  238.88    6.90
   2   5   4  262.87    7.00
   2   5   4  238.98    6.90
  -3  -5  -4    0.00    0.30
  -3  -5  -4    0.10    0.40
  -3  -5  -4    0.10    0.20
  -3  -5  -4    0.10    0.30
  -3  -5  -4    0.00    0.40
   3   5   4    0.10    0.30
   3   5   4   -0.10    0.40
   3   5   4    0.10    0.40
  -4  -5  -4  120.19    3.80
  -4  -5  -4  121.49    3.50
  -4  -5  -4  115.39    3.70
  -4  -5  -4  126.69    3.40
   4   5   4  121.59    3.70
   4   5   4  126.99    3.50
   4   5   4  130.99    3.70
  -5  -5  -4   27.50    1.40
  -5  -5  -4   27.40    1.10
  -5  -5  -4   29.00    1.00
   5   5   4   27.80    1.10
   5   5   4   28.20    1.30
   5   5   4   32.80    1.30
  -6  -5  -4    1.80    0.40
  -6  -5  -4    1.20    0.60
  -6  -5  -4    1.40    0.40
   6   5   4    1.20    0.40
   6   5   4    1.80    0.50
  -7  -5  -4  106.39    3.70
  -7  -5  -4  116.49    3.40
  -7  -5  -4  112.09    3.40
   7   5   4  114.49    3.60
   7   5   4  110.79    3.40
  -8  -5  -4    3.50    0.60
  -8  -5  -4    5.30    1.00
  -8  -5  -4    2.20    0.60
   8   5   4    3.40    0.60
   8   5   4    3.70    0.80
  -9  -5  -4   69.09    2.80
  -9  -5  -4   72.79    2.60
  -9  -5  -4   73.99    2.50
   9   5   4   72.39    2.50
   9   5   4   71.69    2.80
 -10  -5  -4    4.00    1.20
 -10  -5  -4    3.20    0.70
 -10  -5  -4    2.60    0.80
  10   5   4    3.10    1.00
  10   5   4    3.80    0.80
 -11  -5  -4   20.90    1.70
 -11  -5  -4   17.80    1.30
 -11  -5  -4   20.60    2.00
  11   5   4   20.90    1.50
  11   5   4   17.40    1.70
 -12  -5  -4   46.20    2.50
 -12  -5  -4   45.90    2.70
 -12  -5  -4   43.70    2.10
  12   5   4   47.90    2.20
  12   5   4   45.60    2.60
 -13  -5  -4   16.40    1.60
  13   5   4   13.30    2.00
  -8   6   4    4.80    1.50
  -8   6   4    4.60    1.40
  -7   6   4    8.00    1.30
  -7   6   4    8.60    1.40
   6  -6  -4    4.60    1.30
  -6   6   4    4.20    1.20
  -6   6   4    3.70    1.00
   5  -6  -4    7.30    1.20
   5  -6  -4    6.80    1.10
  -5   6   4    7.60    1.20
  -5   6   4    8.90    1.10
   4  -6  -4    8.50    1.20
   4  -6  -4   10.40    1.20
   4  -6  -4    8.60    1.20
  -4   6   4    6.60    1.00
  -4   6   4    9.30    1.00
   3  -6  -4    8.30    1.10
   3  -6  -4    5.90    0.90
   3  -6  -4    5.90    0.90
  -3   6   4    5.80    0.80
  -3   6   4    6.70    0.90
   2  -6  -4  125.89    3.90
   2  -6  -4  121.29    4.00
   2  -6  -4  119.39    3.90
  -2   6   4  128.99    3.90
  -2   6   4  119.49    3.90
  -2   6   4  128.99    3.80
   1  -6  -4   -0.30    0.40
   1  -6  -4    0.10    0.50
   1  -6  -4   -0.10    0.50
   1  -6  -4    0.30    0.50
  -1   6   4    0.10    0.40
  -1   6   4   -0.20    0.50
  -1   6   4    0.00    0.40
   0  -6  -4  772.02   20.70
   0  -6  -4  738.33   20.80
   0  -6  -4  811.42   20.70
   0  -6  -4  773.12   20.50
   0   6   4  772.92   20.50
   0   6   4  771.62   20.60
   0   6   4  777.32   20.70
  -1  -6  -4    3.20    0.50
  -1  -6  -4    4.00    0.60
  -1  -6  -4    3.40    0.60
  -1  -6  -4    3.80    0.50
   1   6   4    4.50    0.50
   1   6   4    4.80    0.70
   1   6   4    5.50    0.60
  -2  -6  -4    3.80    0.50
  -2  -6  -4    2.90    0.40
  -2  -6  -4    2.10    0.50
  -2  -6  -4    2.20    0.60
  -2  -6  -4    3.00    0.50
   2   6   4    2.80    0.60
   2   6   4    2.70    0.40
   2   6   4    3.70    0.50
  -3  -6  -4  139.59    3.70
  -3  -6  -4  138.29    4.00
  -3  -6  -4  130.79    4.20
  -3  -6  -4  131.89    3.90
   3   6   4  140.19    4.00
   3   6   4  136.89    3.90
   3   6   4  133.09    4.00
  -4  -6  -4   35.10    1.10
  -4  -6  -4   32.50    1.30
  -4  -6  -4   32.20    1.50
  -4  -6  -4   30.90    1.40
   4   6   4   33.20    1.40
   4   6   4   35.10    1.30
   4   6   4   36.60    1.40
  -5  -6  -4  254.07    7.80
  -5  -6  -4  277.77    7.30
  -5  -6  -4  265.97    7.50
   5   6   4  284.17    7.60
   5   6   4  279.57    7.60
   5   6   4  266.17    7.40
  -6  -6  -4    9.50    0.80
  -6  -6  -4    9.70    1.00
  -6  -6  -4   12.10    0.70
   6   6   4   10.90    0.90
   6   6   4   10.30    0.80
  -7  -6  -4   36.80    1.50
  -7  -6  -4   39.10    1.80
  -7  -6  -4   37.70    1.50
   7   6   4   34.40    1.60
   7   6   4   38.70    1.50
  -8  -6  -4   16.60    1.10
  -8  -6  -4   14.40    1.00
  -8  -6  -4   16.30    1.30
   8   6   4   15.60    1.20
   8   6   4   15.00    1.00
  -9  -6  -4   -0.30    0.70
  -9  -6  -4    0.20    0.80
  -9  -6  -4   -0.20    0.50
   9   6   4    0.00    0.70
   9   6   4   -0.30    0.60
 -10  -6  -4   -0.10    0.60
 -10  -6  -4   -0.40    0.90
 -10  -6  -4   -0.10    0.90
  10   6   4   -0.20    0.80
  10   6   4    0.20    0.60
 -11  -6  -4   26.10    2.10
 -11  -6  -4   28.00    1.60
  11   6   4   27.90    1.90
 -12  -6  -4    2.10    1.30
 -12  -6  -4    1.70    0.80
  12   6   4    1.70    1.20
 -13  -6  -4    0.80    1.00
  13   6   4    1.10    1.60
  -7   7   4   24.40    2.10
  -7   7   4   24.30    2.40
   6  -7  -4   -0.70    1.30
  -6   7   4    0.60    1.00
  -6   7   4   -0.20    1.20
   5  -7  -4    0.70    1.20
  -5   7   4    0.10    0.90
  -5   7   4    0.20    1.10
   4  -7  -4   27.90    2.00
  -4   7   4   29.40    1.80
  -4   7   4   31.30    1.80
   3  -7  -4   36.10    2.00
  -3   7   4   36.90    1.80
  -3   7   4   38.20    1.80
   2  -7  -4    3.60    0.90
   2  -7  -4    2.40    0.80
   2  -7  -4    2.50    0.80
  -2   7   4    2.30    0.80
  -2   7   4    2.20    0.70
   1  -7  -4  203.58    6.20
   1  -7  -4  196.28    5.90
   1  -7  -4  209.18    5.90
  -1   7   4  206.38    5.90
  -1   7   4  200.38    5.90
   0  -7  -4   31.20    1.50
   0  -7  -4   34.40    1.50
   0  -7  -4   35.30    1.70
   0   7   4   35.40    1.60
   0   7   4   36.10    1.40
   0   7   4   33.80    1.40
  -1  -7  -4   20.20    1.30
  -1  -7  -4   18.50    1.10
  -1  -7  -4   18.40    1.10
   1   7   4   16.50    1.30
   1   7   4   20.60    1.00
   1   7   4   19.40    1.20
  -2  -7  -4   35.00    1.40
  -2  -7  -4   35.80    1.70
  -2  -7  -4   34.00    1.50
   2   7   4   33.80    1.50
   2   7   4   36.60    1.40
  -3  -7  -4   -0.10    0.50
  -3  -7  -4   -0.10    0.40
  -3  -7  -4    0.00    0.40
   3   7   4   -0.10    0.60
   3   7   4    0.10    0.40
   3   7   4    0.00    0.40
  -4  -7  -4   12.00    1.00
  -4  -7  -4   11.80    0.90
  -4  -7  -4   11.50    0.90
   4   7   4   11.80    0.90
   4   7   4   13.30    0.90
   4   7   4   12.30    0.90
  -5  -7  -4    6.80    0.90
  -5  -7  -4    4.50    0.60
   5   7   4    5.40    0.60
   5   7   4    5.00    0.80
   5   7   4    5.20    0.70
  -6  -7  -4  135.89    4.50
  -6  -7  -4  146.09    4.20
   6   7   4  138.89    4.30
   6   7   4  137.69    4.10
  -7  -7  -4   11.20    0.90
  -7  -7  -4   11.30    1.30
   7   7   4    9.90    0.90
   7   7   4    9.50    1.10
  -8  -7  -4    4.20    0.70
  -8  -7  -4    3.30    0.90
   8   7   4    4.90    0.80
   8   7   4    3.90    0.90
  -9  -7  -4    0.60    0.60
  -9  -7  -4    0.60    1.00
   9   7   4    0.70    0.80
   9   7   4    1.00    0.70
 -10  -7  -4   16.50    1.80
 -10  -7  -4   18.30    1.30
  10   7   4   18.50    1.40
  10   7   4   19.00    1.60
 -11  -7  -4   48.60    2.70
 -11  -7  -4   46.70    2.10
  11   7   4   43.10    2.30
 -12  -7  -4  117.09    3.90
 -12  -7  -4  116.59    4.50
  12   7   4  108.09    4.20
 -13  -7  -4   54.39    2.50
  13   7   4   52.99    3.10
  -6   8   4   29.80    2.20
   5  -8  -4    6.70    1.40
  -5   8   4    8.30    1.30
   4  -8  -4    8.80    1.50
  -4   8   4    8.20    1.20
   3  -8  -4   43.80    2.30
  -3   8   4   46.50    2.20
   2  -8  -4    6.90    1.10
  -2   8   4    7.80    1.10
   1  -8  -4   71.29    2.70
   1  -8  -4   70.39    2.80
  -1   8   4   73.69    2.70
   0  -8  -4    0.30    0.70
   0  -8  -4    0.50    0.70
   0   8   4    1.30    0.70
  -1  -8  -4   14.20    1.20
  -1  -8  -4   17.10    1.30
   1   8   4   15.40    1.20
  -2  -8  -4    8.00    0.90
  -2  -8  -4    7.90    0.90
  -2  -8  -4    7.70    1.00
   2   8   4    7.10    0.90
   2   8   4    7.30    0.80
  -3  -8  -4  121.79    3.90
  -3  -8  -4  128.29    3.90
  -3  -8  -4  126.19    4.20
   3   8   4  127.49    4.00
   3   8   4  132.29    3.80
  -4  -8  -4   15.90    1.30
  -4  -8  -4   14.80    1.00
  -4  -8  -4   13.10    1.00
   4   8   4   15.40    1.00
   4   8   4   14.50    1.00
   4   8   4   14.10    1.20
  -5  -8  -4   80.39    3.00
  -5  -8  -4   82.49    2.80
   5   8   4   83.99    2.80
   5   8   4   87.79    2.80
  -6  -8  -4   23.20    1.30
  -6  -8  -4   26.40    1.60
   6   8   4   26.90    1.30
   6   8   4   24.00    1.40
  -7  -8  -4   13.50    1.30
  -7  -8  -4   13.30    1.10
   7   8   4   13.60    1.10
   7   8   4   13.00    1.20
  -8  -8  -4    1.70    0.70
  -8  -8  -4    1.40    0.90
   8   8   4    1.10    0.70
   8   8   4    1.70    0.80
  -9  -8  -4   20.20    1.40
  -9  -8  -4   19.30    1.60
   9   8   4   19.80    1.40
   9   8   4   17.80    1.50
 -10  -8  -4   49.30    2.10
 -10  -8  -4   47.30    2.60
  10   8   4   48.00    2.40
 -11  -8  -4   10.80    1.20
 -11  -8  -4   14.80    1.80
  11   8   4   12.40    1.60
 -12  -8  -4    4.80    1.10
 -12  -8  -4    5.50    1.50
  12   8   4    6.50    1.60
 -13  -8  -4   11.80    1.50
  13   8   4   11.40    1.90
   5  -9  -4    1.80    1.50
  -5   9   4    2.30    1.30
   4  -9  -4    1.20    1.40
  -4   9   4    0.70    1.10
   3  -9  -4    0.00    1.20
  -3   9   4    0.60    1.00
   2  -9  -4   36.40    2.30
  -2   9   4   36.10    2.00
   1  -9  -4   19.40    1.60
  -1   9   4   22.80    1.60
   0  -9  -4   35.80    2.10
   0   9   4   35.00    1.80
  -1  -9  -4    6.00    1.10
  -1  -9  -4    7.60    1.10
   1   9   4    6.90    0.90
  -2  -9  -4    8.10    1.10
  -2  -9  -4    9.20    1.10
   2   9   4   10.70    1.10
  -3  -9  -4   43.30    2.10
  -3  -9  -4   42.70    1.90
   3   9   4   40.40    1.80
  -4  -9  -4   13.80    1.50
  -4  -9  -4   15.30    1.20
   4   9   4   13.60    1.20
  -5  -9  -4    0.50    0.70
  -5  -9  -4    0.60    0.80
   5   9   4    0.50    0.70
  -6  -9  -4   42.40    1.80
  -6  -9  -4   37.40    2.00
   6   9   4   38.70    1.80
  -7  -9  -4   12.00    1.40
  -7  -9  -4   11.30    1.20
   7   9   4   10.90    1.20
  -8  -9  -4   21.60    1.80
  -8  -9  -4   23.70    1.50
   8   9   4   25.40    1.60
  -9  -9  -4   14.10    1.70
  -9  -9  -4   12.50    1.30
   9   9   4   12.90    1.30
 -10  -9  -4    6.70    1.30
 -10  -9  -4    6.60    1.10
  10   9   4    7.00    1.30
 -11  -9  -4    4.70    1.50
 -11  -9  -4    4.30    1.10
  11   9   4    5.50    1.40
 -12  -9  -4    8.20    1.70
 -12  -9  -4    7.70    1.30
  12   9   4    9.40    1.60
 -13  -9  -4    2.00    1.20
  13   9   4    1.30    1.60
   4 -10  -4    1.60    1.50
  -4  10   4    1.60    1.30
   3 -10  -4    0.90    1.50
  -3  10   4    1.00    1.10
   2 -10  -4   12.90    1.70
  -2  10   4   13.00    1.50
   1 -10  -4    1.80    1.20
  -1  10   4    2.10    1.00
   0 -10  -4    6.90    1.30
   0  10   4    6.80    1.10
  -1 -10  -4    0.90    0.90
   1  10   4    0.00    0.90
  -2 -10  -4   13.60    2.10
  -2 -10  -4   10.60    1.40
   2  10   4    9.60    1.10
  -3 -10  -4    0.60    1.00
  -3 -10  -4    0.20    0.80
   3  10   4    0.40    0.80
  -4 -10  -4    2.10    0.90
  -4 -10  -4    2.20    0.80
   4  10   4    2.60    0.90
  -5 -10  -4   15.20    1.50
  -5 -10  -4   14.90    1.40
  -6 -10  -4   32.40    1.70
  -6 -10  -4   32.40    2.00
  -7 -10  -4   31.90    2.00
  -7 -10  -4   29.80    1.70
  -8 -10  -4   12.20    1.40
  -8 -10  -4    9.70    1.50
  -9 -10  -4    9.30    1.40
  -9 -10  -4    6.50    1.10
   9  10   4    9.90    1.40
 -10 -10  -4    0.20    0.90
 -10 -10  -4    1.00    1.20
  10  10   4    0.20    1.10
 -11 -10  -4    3.40    1.60
 -11 -10  -4    3.60    1.10
  11  10   4    4.50    1.40
 -12 -10  -4   11.30    2.20
 -12 -10  -4   10.40    1.50
  12  10   4   10.40    1.70
   3 -11  -4   56.19    3.60
  -3  11   4   54.69    2.90
   2 -11  -4   31.60    2.70
  -2  11   4   38.00    2.30
   1 -11  -4    1.40    1.40
  -1  11   4    0.20    1.10
   0 -11  -4    5.20    1.40
   0  11   4    6.20    1.20
  -1 -11  -4    0.60    1.10
   1  11   4    1.10    1.00
  -2 -11  -4   12.80    1.70
   2  11   4   15.00    1.60
  -3 -11  -4   -0.20    1.00
   3  11   4   -0.10    1.00
  -4 -11  -4   46.10    2.60
   4  11   4   44.20    2.20
  -5 -11  -4    3.30    1.10
  -5 -11  -4    1.30    1.00
  -6 -11  -4    4.60    1.30
  -6 -11  -4    5.90    1.20
  -7 -11  -4   13.90    1.40
  -7 -11  -4   12.50    1.60
  -8 -11  -4    2.20    1.00
  -8 -11  -4    0.60    1.10
  -9 -11  -4   66.59    2.80
  -9 -11  -4   64.29    3.30
 -10 -11  -4    0.00    1.30
 -10 -11  -4    0.60    1.00
 -11 -11  -4    0.60    1.20
 -11 -11  -4   -0.40    1.40
 -12 -11  -4   34.50    2.60
   1 -12  -4    0.20    1.50
  -1  12   4    0.50    1.30
   0 -12  -4   23.40    2.30
   0  12   4   22.80    2.10
  -1 -12  -4    2.90    1.40
   1  12   4    1.80    1.20
  -2 -12  -4   25.70    2.20
   2  12   4   21.20    2.00
  -3 -12  -4   24.60    2.20
  -4 -12  -4   29.60    2.20
   4  12   4   27.50    1.90
  -5 -12  -4   19.40    2.20
  -6 -12  -4    0.80    1.20
  -7 -12  -4    0.60    1.20
  -8 -12  -4   71.29    3.50
  -8 -12  -4   73.19    3.60
  -9 -12  -4   25.70    2.60
  -9 -12  -4   26.30    2.10
 -10 -12  -4    7.90    1.90
 -10 -12  -4   11.00    1.60
 -11 -12  -4    9.50    2.00
 -11 -12  -4    8.70    1.60
  -1 -13  -4    8.80    2.10
   1  13   4   10.00    1.80
  -2 -13  -4    2.20    1.60
   2  13   4    2.40    1.40
  -3 -13  -4    1.10    1.50
   3  13   4    1.40    1.30
  -4 -13  -4    0.50    1.50
   4  13   4   -0.20    1.30
  -5 -13  -4    9.90    1.90
  -6 -13  -4   30.20    2.80
  -7 -13  -4    3.50    1.70
  -8 -13  -4   20.50    2.70
  -9 -13  -4   26.80    3.00
 -10 -13  -4    2.50    2.10
   4  14   4    3.60    1.70
  -5 -14  -4    0.50    1.80
  -6 -14  -4    1.50    1.80
  -7 -14  -4   12.90    2.20
   7  12  -5    7.30    1.50
  -7 -12   5   11.50    1.60
  -7 -12   5    8.70    1.80
   6  12  -5    6.60    0.90
  -6 -12   5    8.80    1.50
  -6 -12   5    8.10    1.80
   5  12  -5    0.20    0.60
  -5 -12   5   -0.10    1.10
  -5 -12   5    0.50    1.70
  -4 -12   5    3.70    1.20
  -4 -12   5    4.10    1.60
   3  12  -5   -0.40    1.80
  -3 -12   5   -0.40    1.70
  -3 -12   5    0.50    1.10
   2  12  -5   54.49    3.30
  -2 -12   5   48.80    2.50
  -2 -12   5   51.79    3.90
  -2 -12   5   48.20    3.10
  -9 -11   5   22.30    2.40
   8  11  -5   36.60    2.00
  -8 -11   5   38.30    2.30
  -8 -11   5   42.70    2.90
   7  11  -5    5.90    0.90
  -7 -11   5    7.90    1.30
  -7 -11   5    7.40    1.70
   6  11  -5   94.29    3.10
  -6 -11   5   94.99    4.10
  -6 -11   5  107.29    3.60
   5  11  -5    2.50    0.60
  -5 -11   5    2.80    1.00
  -5 -11   5    2.20    1.50
   4  11  -5   19.80    1.00
  -4 -11   5   22.20    1.60
  -4 -11   5   19.10    2.00
   3  11  -5    2.90    1.40
  -3 -11   5    3.30    1.40
  -3 -11   5    3.50    1.00
   2  11  -5   33.30    2.50
  -2 -11   5   32.80    2.70
  -2 -11   5   32.10    2.40
  -2 -11   5   33.10    1.90
   1  11  -5   49.99    3.10
  -1 -11   5   48.00    2.20
  -1 -11   5   45.70    3.00
  -1 -11   5   51.99    3.30
   0  11  -5    0.20    1.60
   0 -11   5    0.00    1.80
   0 -11   5    0.80    1.00
   0 -11   5    0.70    1.40
   1 -11   5    0.60    1.80
   1 -11   5    0.40    1.40
  10  10  -5   22.40    2.00
 -10 -10   5   21.20    2.50
   9  10  -5    4.10    1.10
  -9 -10   5    7.10    1.70
   8  10  -5   13.20    1.40
  -8 -10   5   12.50    1.70
  -8 -10   5   13.30    1.40
   7  10  -5    0.00    0.70
  -7 -10   5    0.80    0.90
  -7 -10   5    0.20    1.30
   6  10  -5    0.00    0.60
  -6 -10   5    0.30    0.80
  -6 -10   5    0.10    1.00
   5  10  -5    3.30    0.60
  -5 -10   5    3.40    1.20
  -5 -10   5    2.70    0.80
   4  10  -5   11.70    0.80
  -4 -10   5   12.00    1.20
  -4 -10   5   10.10    1.40
   3  10  -5   11.80    0.60
   3  10  -5   12.40    1.60
  -3 -10   5   11.30    1.50
  -3 -10   5   13.00    1.30
   2  10  -5  101.79    4.10
  -2 -10   5  103.59    3.40
  -2 -10   5   99.79    4.00
  -2 -10   5   95.59    4.00
   1  10  -5    9.90    1.60
  -1 -10   5   11.50    1.30
  -1 -10   5    9.80    1.50
  -1 -10   5   12.60    1.80
   0  10  -5    4.00    1.40
   0 -10   5    4.10    0.90
   0 -10   5    3.90    1.30
   0 -10   5    4.30    1.40
  -1  10  -5   49.90    3.00
   1 -10   5   48.60    3.00
   1 -10   5   51.19    2.20
  -2  10  -5    5.10    1.70
   2 -10   5    6.30    2.00
   2 -10   5    4.70    1.00
 -11  -9   5   10.90    2.10
  10   9  -5    5.60    1.20
 -10  -9   5    5.70    1.50
   9   9  -5   14.70    1.50
  -9  -9   5   16.20    1.90
  -9  -9   5   18.50    1.60
   8   9  -5   28.10    1.60
  -8  -9   5   28.50    1.70
  -8  -9   5   25.60    2.00
   7   9  -5   14.80    1.10
  -7  -9   5   15.50    1.60
  -7  -9   5   16.40    1.40
   6   9  -5   14.80    1.10
  -6  -9   5   16.10    1.30
  -6  -9   5   15.10    1.70
   5   9  -5    7.90    0.80
  -5  -9   5    8.00    1.30
  -5  -9   5    8.30    0.90
   4   9  -5    2.00    0.50
  -4  -9   5    1.70    0.90
  -4  -9   5    2.40    0.70
   3   9  -5   17.50    1.80
   3   9  -5   17.80    0.80
  -3  -9   5   19.40    1.60
  -3  -9   5   17.80    1.20
  -3  -9   5   19.00    1.70
   2   9  -5    6.70    1.30
  -2  -9   5   10.40    1.40
  -2  -9   5    6.90    0.80
  -2  -9   5    9.00    1.30
   1   9  -5    5.20    1.30
  -1  -9   5    5.50    1.30
  -1  -9   5    7.00    1.20
  -1  -9   5    5.30    0.80
   0   9  -5    9.90    1.40
   0  -9   5    8.90    1.30
   0  -9   5    7.10    1.40
   0  -9   5    9.50    1.00
  -1   9  -5   21.80    2.00
   1  -9   5   19.50    1.30
   1  -9   5   20.80    2.10
  -2   9  -5   17.10    1.90
   2  -9   5   17.10    1.30
   2  -9   5   17.00    2.20
  -3   9  -5    0.20    1.30
   3  -9   5    0.00    1.60
   3  -9   5   -0.10    0.80
  -4   9  -5  121.19    4.80
   4  -9   5  119.79    5.00
   4  -9   5  121.19    4.00
  11   8  -5   20.70    2.10
 -11  -8   5   20.40    2.20
  10   8  -5   27.70    1.90
 -10  -8   5   29.40    2.20
   9   8  -5    1.80    0.90
  -9  -8   5    2.20    0.90
  -9  -8   5    3.00    1.10
   8   8  -5   17.00    1.30
  -8  -8   5   16.50    1.60
  -8  -8   5   19.60    1.50
   7   8  -5   96.19    3.20
  -7  -8   5   98.79    3.30
  -7  -8   5   98.89    3.60
   6   8  -5    2.50    0.60
  -6  -8   5    1.90    0.90
  -6  -8   5    3.00    0.70
   5   8  -5   95.59    2.90
  -5  -8   5   92.19    3.40
  -5  -8   5   91.59    3.00
   4   8  -5    7.00    0.70
  -4  -8   5    7.80    1.10
  -4  -8   5    6.00    0.70
   3   8  -5   -0.10    0.30
   3   8  -5    0.40    0.90
  -3  -8   5    0.20    0.50
  -3  -8   5   -0.20    0.80
  -3  -8   5    0.40    0.90
   2   8  -5    2.90    0.90
  -2  -8   5    2.70    0.60
  -2  -8   5    3.00    0.90
  -2  -8   5    2.30    1.00
   1   8  -5    1.00    0.90
  -1  -8   5    1.30    0.50
  -1  -8   5    0.50    0.80
  -1  -8   5    1.00    0.90
   0   8  -5   67.79    2.90
   0  -8   5   68.79    2.30
   0  -8   5   72.89    3.00
  -1   8  -5    5.80    1.10
   1  -8   5    6.30    1.30
   1  -8   5    4.40    0.70
  -2   8  -5   21.50    1.90
   2  -8   5   19.70    1.80
   2  -8   5   20.80    1.20
  -3   8  -5    1.40    1.10
   3  -8   5    1.00    0.70
   3  -8   5    0.80    1.20
  -4   8  -5   10.70    1.70
   4  -8   5   12.80    1.80
   4  -8   5   12.50    1.20
  -5   8  -5    1.50    1.50
   5  -8   5    1.20    0.90
   5  -8   5    2.00    1.80
  12   7  -5    1.90    1.40
  12   7  -5    3.60    1.90
  11   7  -5    5.60    1.70
  11   7  -5    6.00    1.40
 -11  -7   5    6.90    1.60
  10   7  -5    4.90    1.30
  10   7  -5    4.10    1.10
 -10  -7   5    4.70    1.30
   9   7  -5   14.60    1.40
  -9  -7   5   14.70    1.40
  -9  -7   5   10.90    1.40
   8   7  -5    2.10    0.70
  -8  -7   5    2.70    0.80
  -8  -7   5    2.90    1.00
   7   7  -5   33.50    1.50
  -7  -7   5   32.30    1.90
  -7  -7   5   35.30    1.60
   6   7  -5    4.90    0.60
  -6  -7   5    3.00    0.60
  -6  -7   5    4.00    1.00
   5   7  -5    0.00    0.40
  -5  -7   5    0.00    0.70
  -5  -7   5    0.20    0.50
   4   7  -5   24.40    1.00
  -4  -7   5   21.60    1.50
  -4  -7   5   24.50    1.20
   3   7  -5   27.30    1.00
   3   7  -5   27.80    1.70
  -3  -7   5   26.40    1.50
  -3  -7   5   25.60    1.60
  -3  -7   5   27.50    1.20
   2   7  -5   -0.30    0.80
  -2  -7   5   -0.40    0.70
  -2  -7   5   -0.10    0.70
  -2  -7   5    0.10    0.40
   1   7  -5  201.98    6.30
  -1  -7   5  207.18    5.80
  -1  -7   5  207.38    6.30
  -1  -7   5  205.58    6.20
   0   7  -5   -0.10    0.70
   0  -7   5    0.00    0.40
   0  -7   5    0.00    0.80
  -1   7  -5   -0.70    0.80
   1  -7   5    0.10    0.40
   1  -7   5   -0.40    0.80
  -2   7  -5    0.90    0.90
   2  -7   5    1.10    0.90
   2  -7   5    1.00    0.50
  -3   7  -5    0.00    0.90
   3  -7   5   -0.20    0.90
   3  -7   5   -0.20    0.50
  -4   7  -5    5.30    1.30
   4  -7   5    5.60    0.80
   4  -7   5    5.80    1.30
  -5   7  -5   26.50    2.10
   5  -7   5   28.20    2.50
   5  -7   5   23.20    1.40
  -6   7  -5   -0.40    1.30
   6  -7   5   -0.20    1.40
   6  -7   5   -0.20    0.80
  12   6  -5   -0.20    1.40
  12   6  -5    0.50    1.80
 -12  -6   5    1.20    1.50
  11   6  -5    0.20    1.10
  11   6  -5    0.50    1.50
 -11  -6   5    0.10    1.20
  10   6  -5   68.69    3.10
  10   6  -5   66.59    2.80
 -10  -6   5   62.49    2.90
   9   6  -5    6.30    1.30
   9   6  -5    6.30    1.00
  -9  -6   5    6.30    1.00
  -9  -6   5    5.40    1.10
   8   6  -5   13.20    1.20
   8   6  -5   13.10    1.50
  -8  -6   5   12.80    1.10
  -8  -6   5   14.80    1.40
   7   6  -5   51.49    1.90
   7   6  -5   51.59    2.10
  -7  -6   5   47.60    1.90
  -7  -6   5   52.69    2.30
   6   6  -5   73.39    2.60
   6   6  -5   69.59    2.30
  -6  -6   5   73.49    2.40
  -6  -6   5   70.09    2.70
   5   6  -5   41.20    1.50
  -5  -6   5   40.20    1.90
  -5  -6   5   41.60    1.60
   4   6  -5  122.19    3.50
  -4  -6   5  127.89    4.00
  -4  -6   5  124.79    3.70
   3   6  -5    3.30    0.30
  -3  -6   5    3.40    0.50
  -3  -6   5    2.80    0.70
  -3  -6   5    2.70    0.70
   2   6  -5 1372.46   37.10
  -2  -6   5 1430.96   37.00
  -2  -6   5 1411.56   37.10
  -2  -6   5 1360.46   36.70
   1   6  -5  295.47    8.40
  -1  -6   5  288.67    7.90
  -1  -6   5  284.37    8.30
  -1  -6   5  290.67    8.30
   0   6  -5  102.29    3.50
   0  -6   5  104.99    3.60
   0  -6   5  104.49    3.00
  -1   6  -5   15.30    1.20
   1  -6   5   13.90    1.20
   1  -6   5   13.10    0.80
  -2   6  -5   15.80    1.40
   2  -6   5   15.50    1.40
   2  -6   5   16.50    0.90
  -3   6  -5   49.99    2.30
   3  -6   5   51.89    2.40
   3  -6   5   49.50    1.80
  -4   6  -5    5.60    1.10
   4  -6   5    5.60    0.70
   4  -6   5    5.70    1.30
  -5   6  -5   22.20    2.00
   5  -6   5   23.20    1.30
   5  -6   5   23.90    2.00
  -6   6  -5    2.70    1.20
   6  -6   5    1.90    1.30
   6  -6   5    3.10    0.80
  -7   6  -5   22.80    2.20
   7  -6   5   22.40    2.30
   7  -6   5   22.50    1.60
  12   5  -5    1.40    1.40
  12   5  -5    3.10    1.70
 -12  -5   5    3.30    1.50
  11   5  -5  123.39    4.70
  11   5  -5  117.19    4.20
 -11  -5   5  120.39    4.60
  10   5  -5   60.69    2.90
  10   5  -5   66.09    2.70
 -10  -5   5   65.29    2.90
   9   5  -5   10.10    1.20
   9   5  -5    8.50    1.30
  -9  -5   5   11.10    1.20
  -9  -5   5    8.70    1.20
   8   5  -5    1.30    0.90
   8   5  -5    1.00    0.70
  -8  -5   5    1.30    0.80
  -8  -5   5    1.10    0.60
   7   5  -5   21.20    1.50
   7   5  -5   20.00    1.20
  -7  -5   5   20.40    1.10
  -7  -5   5   18.90    1.40
   6   5  -5   37.70    1.70
   6   5  -5   37.00    1.50
  -6  -5   5   36.20    1.70
  -6  -5   5   36.30    1.50
   5   5  -5    1.90    0.70
   5   5  -5    1.90    0.40
  -5  -5   5    2.10    0.70
  -5  -5   5    1.50    0.50
   4   5  -5   16.40    0.80
   4   5  -5   17.20    1.10
  -4  -5   5   16.40    0.90
  -4  -5   5   19.80    1.20
   3   5  -5   10.30    0.50
   3   5  -5   13.50    0.90
   3   5  -5   11.90    0.60
  -3  -5   5   10.30    0.70
  -3  -5   5   11.70    0.90
  -3  -5   5    9.90    1.00
   2   5  -5  213.28    6.30
  -2  -5   5  217.98    5.80
  -2  -5   5  215.48    6.10
  -2  -5   5  206.98    6.20
   1   5  -5  140.09    4.30
  -1  -5   5  138.19    4.30
  -1  -5   5  140.89    3.90
  -1  -5   5  140.39    4.30
   0   5  -5    1.10    0.60
   0  -5   5    0.60    0.60
   0  -5   5    0.60    0.30
  -1   5  -5   24.40    1.40
   1  -5   5   21.30    0.90
   1  -5   5   18.40    1.40
  -2   5  -5   10.40    1.10
   2  -5   5   10.50    1.10
   2  -5   5   11.70    0.70
  -3   5  -5   50.49    2.20
   3  -5   5   49.00    1.70
   3  -5   5   50.89    2.30
  -4   5  -5  125.59    4.30
   4  -5   5  125.39    3.70
   4  -5   5  131.69    4.40
  -5   5  -5    0.00    0.90
   5  -5   5   -0.10    0.90
   5  -5   5    0.30    0.50
  -6   5  -5    7.00    1.30
   6  -5   5    5.90    1.30
   6  -5   5    7.90    0.80
  -7   5  -5    1.10    1.20
   7  -5   5   -0.20    0.70
   7  -5   5   -0.50    1.30
  -8   5  -5   -0.20    1.30
   8  -5   5    0.80    0.90
   8  -5   5   -0.10    1.60
  12   4  -5    0.90    1.40
  12   4  -5    1.10    1.60
 -12  -4   5    0.80    1.40
  11   4  -5   13.00    1.80
 -11  -4   5   13.90    1.70
  10   4  -5   66.09    3.00
  10   4  -5   70.49    2.80
 -10  -4   5   74.09    3.10
   9   4  -5   14.10    1.30
   9   4  -5   12.10    1.40
  -9  -4   5   15.20    1.50
  -9  -4   5   16.80    1.50
   8   4  -5    2.30    1.00
   8   4  -5    2.40    0.80
  -8  -4   5    2.10    0.70
  -8  -4   5    1.50    0.80
   7   4  -5   10.40    0.90
   7   4  -5   11.40    1.10
  -7  -4   5   10.40    0.90
  -7  -4   5    9.30    1.10
   6   4  -5   19.30    1.00
   6   4  -5   17.70    1.20
  -6  -4   5   19.10    1.20
  -6  -4   5   18.10    1.00
   5   4  -5    8.90    0.70
   5   4  -5    9.60    1.00
  -5  -4   5   11.40    1.00
  -5  -4   5   10.80    0.70
   4   4  -5   10.10    0.90
   4   4  -5   10.30    0.60
  -4  -4   5   10.20    0.70
  -4  -4   5    8.70    0.90
   3   4  -5   29.80    1.20
   3   4  -5   26.40    0.90
   3   4  -5   29.40    0.90
  -3  -4   5   25.00    1.30
  -3  -4   5   26.00    1.10
  -3  -4   5   27.00    1.00
   2   4  -5    0.40    0.40
   2   4  -5    0.60    0.50
  -2  -4   5    0.70    0.40
  -2  -4   5    0.40    0.20
  -2  -4   5    0.80    0.50
   1   4  -5    3.20    0.40
   1   4  -5    3.80    0.60
  -1  -4   5    2.50    0.30
  -1  -4   5    2.30    0.50
  -1  -4   5    3.00    0.60
  -1  -4   5    2.50    0.30
   0   4  -5   34.30    1.50
   0   4  -5   37.20    1.20
   0  -4   5   33.70    1.50
   0  -4   5   32.50    1.10
   0  -4   5   33.70    1.10
  -1   4  -5    0.60    0.50
   1  -4   5    0.60    0.20
   1  -4   5    0.20    0.50
  -2   4  -5   53.29    2.00
   2  -4   5   48.40    1.50
   2  -4   5   44.40    2.00
  -3   4  -5   39.70    1.80
   3  -4   5   39.60    1.90
   3  -4   5   38.60    1.30
  -4   4  -5   48.10    2.10
   4  -4   5   44.60    2.20
   4  -4   5   50.39    1.60
  -5   4  -5   29.50    1.70
   5  -4   5   33.30    1.90
   5  -4   5   31.40    1.30
  -6   4  -5   16.30    1.50
   6  -4   5   16.10    1.60
   6  -4   5   17.30    1.00
  -7   4  -5   -0.10    1.00
   7  -4   5    0.70    1.10
   7  -4   5    0.80    0.60
  -8   4  -5   11.20    1.60
   8  -4   5   12.10    1.80
   8  -4   5    9.00    1.00
  -9   4  -5   40.40    2.70
   9  -4   5   40.20    2.90
   9  -4   5   44.20    2.10
  12   3  -5   14.40    1.90
  12   3  -5   12.80    2.20
 -12  -3   5   14.00    2.00
  11   3  -5    0.30    1.20
  11   3  -5    0.10    1.40
 -11  -3   5    0.60    1.30
  10   3  -5    2.90    1.30
  10   3  -5    1.80    1.00
 -10  -3   5    3.00    1.10
   9   3  -5    0.40    0.80
   9   3  -5    0.00    0.90
  -9  -3   5    1.20    0.90
   8   3  -5   78.99    3.10
   8   3  -5   81.09    2.80
  -8  -3   5   85.59    2.80
  -8  -3   5   84.79    3.10
   7   3  -5   53.99    2.30
   7   3  -5   52.69    2.00
  -7  -3   5   57.79    2.00
  -7  -3   5   56.49    2.30
   6   3  -5   17.40    1.30
   6   3  -5   15.60    0.90
  -6  -3   5   14.90    0.90
  -6  -3   5   16.50    1.10
   5   3  -5    5.50    0.80
   5   3  -5    5.20    0.60
  -5  -3   5    5.20    0.60
  -5  -3   5    5.10    0.70
   4   3  -5   -0.10    0.30
   4   3  -5    0.20    0.50
  -4  -3   5    0.10    0.30
  -4  -3   5    0.20    0.40
   3   3  -5   58.89    1.70
   3   3  -5   56.89    1.70
   3   3  -5   61.19    2.00
  -3  -3   5   59.79    1.70
  -3  -3   5   51.89    2.00
  -3  -3   5   54.49    1.70
   2   3  -5   69.39    2.20
  -2  -3   5   66.29    2.00
  -2  -3   5   66.49    2.20
  -2  -3   5   67.79    2.10
  -2  -3   5   64.59    1.90
   1   3  -5   50.49    1.80
   1   3  -5   52.89    1.70
  -1  -3   5   49.30    1.40
  -1  -3   5   47.70    1.70
  -1  -3   5   47.20    1.80
  -1  -3   5   49.40    1.50
   0   3  -5    1.60    0.50
   0   3  -5    2.00    0.40
   0  -3   5    1.60    0.50
   0  -3   5    1.80    0.20
   0  -3   5    1.80    0.20
  -1   3  -5   71.79    2.20
  -1   3  -5   74.69    2.40
   1  -3   5   71.59    2.00
   1  -3   5   73.19    2.20
   1  -3   5   69.59    2.40
   1  -3   5   69.39    2.00
  -2   3  -5    3.30    0.60
  -2   3  -5    3.40    0.70
   2  -3   5    4.00    0.50
   2  -3   5    3.10    0.60
   2  -3   5    3.90    0.30
   2  -3   5    3.80    0.30
  -3   3  -5   16.40    1.10
  -3   3  -5   15.10    1.00
   3  -3   5   14.80    0.80
   3  -3   5   13.90    0.60
   3  -3   5   11.70    1.00
  -4   3  -5  107.49    3.50
  -4   3  -5  111.79    3.80
   4  -3   5  113.69    3.70
   4  -3   5  102.49    3.10
   4  -3   5  108.49    3.30
  -5   3  -5    1.00    0.70
  -5   3  -5    0.40    0.70
   5  -3   5    0.90    0.70
   5  -3   5    1.20    0.40
   5  -3   5    1.10    0.70
  -6   3  -5    0.50    0.80
  -6   3  -5    0.20    0.90
   6  -3   5    0.40    0.80
   6  -3   5    1.00    0.40
  -7   3  -5    6.40    1.10
  -7   3  -5    6.90    1.30
   7  -3   5    7.20    1.30
   7  -3   5    7.30    0.80
  -8   3  -5   14.40    1.60
   8  -3   5   18.40    1.20
   8  -3   5   17.70    1.80
  -9   3  -5   52.59    2.80
   9  -3   5   54.99    2.30
   9  -3   5   58.09    3.20
 -10   3  -5    2.20    1.50
  10  -3   5    3.40    1.10
  10  -3   5    3.90    1.80
  12   2  -5    1.30    1.60
 -12  -2   5    2.00    1.90
  11   2  -5    2.30    1.30
  11   2  -5    2.20    1.40
 -11  -2   5    3.30    1.50
  10   2  -5   37.60    2.10
  10   2  -5   36.60    2.30
 -10  -2   5   38.60    2.20
   9   2  -5    5.60    1.00
   9   2  -5    4.50    1.20
  -9  -2   5    6.30    1.10
   8   2  -5    2.50    0.90
   8   2  -5    2.80    0.80
  -8  -2   5    3.40    0.90
  -8  -2   5    2.60    0.70
   7   2  -5    2.00    0.80
   7   2  -5    2.80    0.70
  -7  -2   5    2.90    0.80
  -7  -2   5    3.40    0.60
   6   2  -5    0.70    0.50
   6   2  -5    0.80    0.60
  -6  -2   5    0.60    0.60
  -6  -2   5    1.10    0.50
   5   2  -5  109.29    3.50
   5   2  -5  104.99    3.20
  -5  -2   5  110.79    3.20
  -5  -2   5  105.89    3.40
   4   2  -5   73.69    2.20
   4   2  -5   75.59    2.50
  -4  -2   5   72.79    2.50
  -4  -2   5   74.19    2.20
   3   2  -5   12.30    0.60
   3   2  -5   13.50    0.60
   3   2  -5   12.50    0.80
  -3  -2   5   10.40    0.80
  -3  -2   5   11.40    0.60
   2   2  -5  242.28    6.80
  -2  -2   5  248.78    6.60
  -2  -2   5  237.58    6.50
  -2  -2   5  250.77    6.60
  -2  -2   5  242.78    6.80
   1   2  -5   13.40    0.70
   1   2  -5   12.40    0.80
  -1  -2   5   12.20    0.80
  -1  -2   5   13.80    0.50
  -1  -2   5   13.90    0.70
  -1  -2   5   12.50    0.50
   0   2  -5  422.96   11.50
   0   2  -5  430.46   11.50
   0   2  -5  431.56   11.60
   0  -2   5  440.06   11.20
   0  -2   5  421.86   11.50
   0  -2   5  420.36   11.20
   0  -2   5  416.96   11.50
  -1   2  -5   71.39    2.40
  -1   2  -5   71.99    2.30
  -1   2  -5   73.69    2.20
   1  -2   5   69.69    2.30
  -2   2  -5   33.60    1.40
  -2   2  -5   35.60    1.30
  -2   2  -5   34.50    1.50
   2  -2   5   33.20    1.00
   2  -2   5   33.60    1.00
   2  -2   5   32.30    1.40
   2  -2   5   33.00    1.30
  -3   2  -5    0.50    0.50
  -3   2  -5    0.70    0.60
   3  -2   5    0.50    0.20
   3  -2   5    0.60    0.20
   3  -2   5    0.40    0.50
   3  -2   5    0.70    0.40
  -4   2  -5    9.50    1.00
  -4   2  -5   10.60    0.90
   4  -2   5    7.40    0.50
   4  -2   5    9.00    0.80
   4  -2   5    8.00    1.00
  -5   2  -5  121.09    3.90
  -5   2  -5  126.89    4.20
   5  -2   5  120.69    3.80
   5  -2   5  124.79    3.50
   5  -2   5  126.29    4.20
  -6   2  -5    2.60    0.80
  -6   2  -5    3.60    0.90
   6  -2   5    2.60    0.80
   6  -2   5    2.10    0.40
   6  -2   5    2.90    0.80
  -7   2  -5    1.00    0.80
  -7   2  -5    1.50    1.10
   7  -2   5    1.30    1.00
   7  -2   5    1.50    0.80
   7  -2   5    1.30    0.50
  -8   2  -5    0.20    1.20
  -8   2  -5    0.60    0.90
   8  -2   5    0.80    1.00
   8  -2   5    0.50    1.10
   8  -2   5    0.80    0.60
  -9   2  -5    7.90    1.60
  -9   2  -5   11.10    1.50
   9  -2   5   12.90    1.70
   9  -2   5   12.00    1.20
 -10   2  -5    2.30    1.30
 -10   2  -5    4.00    1.60
  10  -2   5    3.10    1.40
  10  -2   5    2.50    0.90
  11  -2   5    0.10    1.10
  11  -2   5    0.00    1.60
  11   1  -5    4.10    1.40
  11   1  -5    4.30    1.60
 -11  -1   5    4.20    1.50
  10   1  -5   21.00    1.80
  10   1  -5   19.60    1.90
 -10  -1   5   21.80    1.80
   9   1  -5   40.50    2.20
   9   1  -5   41.90    2.10
  -9  -1   5   38.40    2.10
   8   1  -5  123.19    4.00
   8   1  -5  129.49    4.30
  -8  -1   5  124.59    4.20
   7   1  -5   24.30    1.30
   7   1  -5   24.30    1.50
  -7  -1   5   26.80    1.50
  -7  -1   5   22.20    1.20
   6   1  -5   56.49    2.00
   6   1  -5   57.69    2.30
  -6  -1   5   59.39    2.20
  -6  -1   5   56.79    2.00
   5   1  -5    0.10    0.40
   5   1  -5   -0.10    0.60
  -5  -1   5    0.00    0.50
  -5  -1   5   -0.10    0.30
   4   1  -5  102.89    3.10
   4   1  -5  110.29    3.30
  -4  -1   5   99.19    3.20
  -4  -1   5  108.39    3.10
   3   1  -5   64.49    1.90
   3   1  -5   68.29    2.00
  -3  -1   5   63.99    1.90
  -3  -1   5   62.79    2.10
   2   1  -5    0.20    0.20
   2   1  -5    0.20    0.30
   2   1  -5    0.30    0.20
  -2  -1   5    0.20    0.30
  -2  -1   5    0.20    0.20
  -2  -1   5    0.20    0.20
  -2  -1   5    0.20    0.20
   1   1  -5    5.50    0.50
   1   1  -5    5.90    0.50
  -1  -1   5    5.30    0.30
  -1  -1   5    5.10    0.50
  -1  -1   5    5.50    0.40
  -1  -1   5    5.60    0.30
   0   1  -5  113.29    3.40
   0   1  -5  122.09    3.40
   0   1  -5  120.09    3.40
   0  -1   5  114.59    3.40
  -1   1  -5  218.28    6.20
  -1   1  -5  222.18    6.20
  -1   1  -5  228.78    6.20
  -2   1  -5   61.79    2.00
  -2   1  -5   60.49    2.10
  -2   1  -5   59.59    2.00
   2  -1   5   56.89    1.90
  -3   1  -5  101.39    3.10
  -3   1  -5  101.99    3.20
   3  -1   5   99.59    2.70
   3  -1   5   95.49    3.00
   3  -1   5  102.89    2.70
  -4   1  -5   59.39    2.10
  -4   1  -5   55.79    2.20
   4  -1   5   57.99    1.70
   4  -1   5   55.29    1.90
   4  -1   5   57.39    1.70
  -5   1  -5   34.90    1.70
  -5   1  -5   31.90    1.50
   5  -1   5   30.40    1.60
   5  -1   5   32.80    1.10
   5  -1   5   30.70    1.40
  -6   1  -5   86.79    3.00
  -6   1  -5   84.09    3.10
   6  -1   5   86.49    3.10
   6  -1   5   84.99    2.60
   6  -1   5   80.99    2.90
  -7   1  -5    0.70    0.70
  -7   1  -5    0.80    0.90
   7  -1   5    0.50    0.80
   7  -1   5    0.80    0.80
   7  -1   5    0.60    0.40
  -8   1  -5   14.60    1.60
  -8   1  -5   13.80    1.40
   8  -1   5   12.90    1.50
   8  -1   5   14.10    1.40
   8  -1   5   14.80    1.00
  -9   1  -5   27.60    0.90
  -9   1  -5   26.60    2.10
  -9   1  -5   22.90    1.80
   9  -1   5   27.50    2.00
   9  -1   5   28.70    2.00
   9  -1   5   28.20    1.50
 -10   1  -5   20.50    2.40
 -10   1  -5   19.40    0.80
 -10   1  -5   20.60    2.10
  10  -1   5   22.50    2.30
  10  -1   5   18.60    2.00
  10  -1   5   17.60    1.50
 -11   1  -5   24.80    2.60
 -11   1  -5   24.10    2.30
  11  -1   5   26.00    2.60
  11  -1   5   22.20    2.40
  11  -1   5   22.60    1.80
  11   0  -5   12.30    2.00
 -11   0   5   12.30    1.90
  10   0  -5    0.30    1.20
  10   0  -5    0.40    1.10
 -10   0   5    0.70    1.20
   9   0  -5   57.39    2.80
   9   0  -5   52.29    2.40
  -9   0   5   56.79    2.60
   8   0  -5  210.58    6.60
   8   0  -5  215.68    6.40
  -8   0   5  212.08    6.50
   7   0  -5   12.80    1.10
   7   0  -5   10.80    1.20
  -7   0   5   11.70    1.10
  -7   0   5   13.50    1.30
   6   0  -5   85.49    2.80
   6   0  -5   82.89    3.00
  -6   0   5   85.89    2.70
  -6   0   5   79.29    2.90
   5   0  -5    3.60    0.50
   5   0  -5    3.30    0.70
  -5   0   5    3.40    0.70
  -5   0   5    4.90    0.60
   4   0  -5  121.49    3.70
   4   0  -5  127.39    3.90
  -4   0   5  126.89    3.80
  -4   0   5  128.59    3.60
   3   0  -5   42.30    1.50
   3   0  -5   47.00    1.70
   3   0  -5   46.10    1.50
  -3   0   5   44.70    1.60
  -3   0   5   48.20    1.50
   2   0  -5   94.39    2.50
   2   0  -5   87.69    2.80
   2   0  -5   92.39    2.60
   2   0  -5   96.99    2.60
  -2   0   5   90.79    2.80
  -2   0   5   85.89    2.60
   1   0  -5    0.20    0.20
   1   0  -5    0.10    0.40
  -1   0   5    0.30    0.20
  -1   0   5    0.40    0.20
  -1   0   5    0.20    0.30
   0   0  -5  315.97    8.50
   0   0  -5  307.77    8.40
   0   0  -5  315.37    8.40
   0   0   5  311.27    8.10
   0   0   5  307.57    8.10
   0   0   5  300.27    8.30
  -1   0  -5   52.09    1.80
  -1   0  -5   53.59    1.80
  -1   0  -5   53.39    1.70
  -2   0  -5   60.29    2.00
  -2   0  -5   59.89    2.00
  -3   0  -5    8.90    0.60
  -3   0  -5    8.40    0.70
  -3   0  -5    7.70    0.60
   3   0   5    7.20    0.30
   3   0   5    6.50    0.60
   3   0   5    7.20    0.30
  -4   0  -5    2.80    0.50
  -4   0  -5    1.00    0.50
   4   0   5    2.40    0.50
   4   0   5    1.90    0.30
   4   0   5    1.70    0.20
  -5   0  -5   53.89    1.90
  -5   0  -5   51.89    2.10
   5   0   5   50.29    1.60
   5   0   5   52.19    1.90
  -6   0  -5  180.28    5.50
  -6   0  -5  168.48    5.20
   6   0   5  176.48    4.90
   6   0   5  176.78    5.20
  -7   0  -5   17.90    1.20
  -7   0  -5   18.80    0.60
  -7   0  -5   18.90    0.60
  -7   0  -5   17.10    1.40
   7   0   5   19.00    1.30
   7   0   5   18.90    0.90
  -8   0  -5    6.50    1.10
  -8   0  -5    7.00    0.50
  -8   0  -5    7.40    1.00
   8   0   5    5.80    1.10
   8   0   5    6.60    0.70
   8   0   5    8.20    1.10
  -9   0  -5   16.10    0.80
  -9   0  -5   16.70    1.60
  -9   0  -5   17.80    1.70
   9   0   5   18.50    1.60
   9   0   5   16.50    1.50
   9   0   5   16.80    1.10
 -10   0  -5  114.59    4.40
 -10   0  -5  112.49    3.20
 -10   0  -5  108.49    4.10
  10   0   5  114.39    4.30
  10   0   5  117.59    4.20
  10   0   5  110.99    3.60
 -11   0  -5   28.50    2.40
 -11   0  -5   30.30    2.80
 -11   0  -5   27.90    1.20
  11   0   5   27.90    2.60
  11   0   5   29.00    2.50
  11   0   5   29.00    1.90
 -12   0  -5   -0.20    1.70
 -12   0  -5    0.30    0.60
 -12   0  -5    0.50    1.90
  12   0   5    1.20    1.90
  12   0   5    1.00    1.70
  12   0   5   -0.20    1.10
  11  -1  -5   35.90    2.90
 -11   1   5   36.50    2.70
  10  -1  -5    1.80    1.40
 -10   1   5    2.90    1.50
   9  -1  -5    2.10    1.10
   9  -1  -5    2.90    1.10
  -9   1   5    2.30    1.10
   8  -1  -5   50.69    2.30
   8  -1  -5   48.70    2.40
  -8   1   5   49.90    2.30
   7  -1  -5   92.89    3.20
   7  -1  -5   87.99    3.40
  -7   1   5   98.19    3.30
   6  -1  -5   38.10    1.90
   6  -1  -5   39.80    1.70
  -6   1   5   43.00    1.90
  -6   1   5   41.70    1.60
   5  -1  -5   26.50    1.40
   5  -1  -5   21.90    1.20
  -5   1   5   23.20    1.10
  -5   1   5   19.10    1.20
   4  -1  -5   85.59    3.00
   4  -1  -5   89.99    2.80
  -4   1   5   92.69    2.80
  -4   1   5   91.49    2.90
  -4   1   5   94.99    2.90
   3  -1  -5   12.60    0.70
   3  -1  -5   16.30    0.70
   3  -1  -5   12.40    0.90
  -3   1   5   15.10    0.70
  -3   1   5   13.10    0.80
  -3   1   5   13.80    0.90
   2  -1  -5   14.60    0.60
   2  -1  -5   14.80    0.70
   2  -1  -5   13.00    0.60
   2  -1  -5   12.70    0.80
  -2   1   5   12.10    0.70
  -2   1   5   14.20    0.60
   1  -1  -5  104.89    3.20
   1  -1  -5  107.99    3.00
   1  -1  -5  108.49    2.90
   1  -1  -5  103.99    2.90
  -1   1   5  100.19    2.90
  -1   1   5   99.59    3.00
   0  -1  -5  419.86   10.90
   0  -1  -5  397.96   11.00
   0   1   5  403.26   10.70
   0   1   5  407.86   10.80
   0   1   5  403.06   10.70
  -1  -1  -5    3.60    0.40
  -1  -1  -5    3.40    0.50
  -1  -1  -5    2.80    0.40
   1   1   5    2.90    0.20
   1   1   5    3.00    0.20
   1   1   5    2.80    0.30
  -2  -1  -5   26.40    1.10
  -2  -1  -5   25.80    1.10
  -2  -1  -5   25.20    0.90
   2   1   5   24.50    0.70
   2   1   5   24.40    0.70
  -3  -1  -5  219.68    6.00
  -3  -1  -5  211.58    6.10
  -3  -1  -5  216.48    5.90
   3   1   5  206.88    6.00
   3   1   5  207.68    5.60
   3   1   5  215.18    5.60
  -4  -1  -5   84.49    2.60
  -4  -1  -5   84.09    2.80
   4   1   5   81.59    2.40
   4   1   5   85.09    2.70
   4   1   5   86.99    2.40
  -5  -1  -5   19.20    1.00
  -5  -1  -5   17.90    1.10
   5   1   5   16.10    0.70
   5   1   5   16.20    1.00
  -6  -1  -5  120.89    3.20
  -6  -1  -5  116.69    3.90
  -6  -1  -5  120.49    3.20
  -6  -1  -5  122.49    3.70
   6   1   5  116.69    3.40
   6   1   5  120.19    3.80
  -7  -1  -5    2.60    0.90
  -7  -1  -5    1.80    0.70
  -7  -1  -5    1.80    0.30
   7   1   5    1.90    0.40
   7   1   5    1.90    0.70
  -8  -1  -5   92.49    3.50
  -8  -1  -5   87.09    3.10
  -8  -1  -5   89.29    2.60
   8   1   5   89.19    2.80
   8   1   5   94.29    3.30
  -9  -1  -5    0.90    1.00
  -9  -1  -5    0.50    0.40
  -9  -1  -5    0.40    0.90
   9   1   5    0.10    0.80
   9   1   5    1.30    0.60
 -10  -1  -5   12.00    1.50
 -10  -1  -5   13.20    0.90
 -10  -1  -5   17.20    2.00
  10   1   5   14.40    1.80
  10   1   5   13.40    1.70
  10   1   5   13.70    1.20
 -11  -1  -5   15.00    1.00
 -11  -1  -5   16.80    2.10
 -11  -1  -5   12.50    1.60
  11   1   5   16.80    1.40
  11   1   5   15.60    2.00
  11   1   5   14.20    1.80
 -12  -1  -5    0.70    1.50
 -12  -1  -5    0.00    0.60
 -12  -1  -5    0.20    1.80
  12   1   5    0.30    1.50
  12   1   5   -0.30    1.00
  12   1   5    0.60    1.70
  10  -2  -5   24.40    2.70
 -10   2   5   23.80    2.20
   9  -2  -5   25.10    2.40
   9  -2  -5   26.90    2.30
  -9   2   5   26.50    2.10
   8  -2  -5   17.70    1.70
   8  -2  -5   19.60    1.90
  -8   2   5   20.00    1.80
   7  -2  -5   33.70    1.80
   7  -2  -5   35.80    2.10
  -7   2   5   36.70    1.90
   6  -2  -5   44.00    2.10
   6  -2  -5   43.90    1.90
  -6   2   5   47.90    2.00
  -6   2   5   53.29    1.90
   5  -2  -5   74.59    2.70
   5  -2  -5   76.39    2.60
  -5   2   5   74.09    2.50
  -5   2   5   75.89    2.60
   4  -2  -5   11.50    1.00
   4  -2  -5   12.40    0.90
   4  -2  -5   13.10    0.80
  -4   2   5   13.50    0.80
  -4   2   5   12.40    0.90
  -4   2   5   12.80    1.00
   3  -2  -5   97.59    2.80
   3  -2  -5   93.29    3.10
   3  -2  -5   95.49    2.90
  -3   2   5   92.79    2.90
  -3   2   5   97.09    2.80
  -3   2   5   94.19    2.90
   2  -2  -5   42.00    1.60
   2  -2  -5   40.50    1.40
   2  -2  -5   44.80    1.40
  -2   2   5   44.10    1.50
  -2   2   5   42.40    1.40
  -2   2   5   40.80    1.50
   1  -2  -5   30.60    1.10
   1  -2  -5   28.40    1.20
   1  -2  -5   32.60    1.10
   1  -2  -5   29.20    1.00
  -1   2   5   30.80    1.10
  -1   2   5   29.40    1.00
   0  -2  -5   30.10    1.20
   0  -2  -5   32.10    1.00
   0  -2  -5   31.20    1.00
   0  -2  -5   31.20    1.20
   0   2   5   31.00    1.00
   0   2   5   29.60    1.00
  -1  -2  -5    4.40    0.20
  -1  -2  -5    4.20    0.50
  -1  -2  -5    4.00    0.20
  -1  -2  -5    3.90    0.50
   1   2   5    3.70    0.30
   1   2   5    4.80    0.30
   1   2   5    3.50    0.30
  -2  -2  -5   25.70    1.10
  -2  -2  -5   25.30    0.80
  -2  -2  -5   24.80    1.10
   2   2   5   23.30    0.80
   2   2   5   22.10    0.80
  -3  -2  -5  219.38    6.10
  -3  -2  -5  219.88    5.80
  -3  -2  -5  219.58    6.10
   3   2   5  214.48    5.80
   3   2   5  215.68    5.80
   3   2   5  203.18    6.00
  -4  -2  -5    1.00    0.30
  -4  -2  -5    0.60    0.50
  -4  -2  -5    0.80    0.50
   4   2   5    0.80    0.40
   4   2   5    1.30    0.30
   4   2   5    1.00    0.20
  -5  -2  -5  160.28    4.80
  -5  -2  -5  155.28    4.20
  -5  -2  -5  156.28    4.20
  -5  -2  -5  159.98    4.50
   5   2   5  158.98    4.30
   5   2   5  155.08    4.60
  -6  -2  -5    5.00    0.80
  -6  -2  -5    7.50    0.70
  -6  -2  -5    5.40    0.40
  -6  -2  -5    6.70    0.40
   6   2   5    5.70    0.70
   6   2   5    6.30    0.50
  -7  -2  -5  120.79    3.70
  -7  -2  -5  118.59    4.00
  -7  -2  -5  119.29    3.30
   7   2   5  115.89    3.40
   7   2   5  118.39    3.80
  -8  -2  -5   20.80    0.90
  -8  -2  -5   19.10    1.50
  -8  -2  -5   20.30    1.30
   8   2   5   21.80    1.00
   8   2   5   20.50    1.40
  -9  -2  -5   15.40    1.40
  -9  -2  -5   16.50    0.90
  -9  -2  -5   15.50    1.70
   9   2   5   14.70    1.30
   9   2   5   13.00    1.00
 -10  -2  -5   18.30    1.00
 -10  -2  -5   18.90    1.90
 -10  -2  -5   20.60    1.70
  10   2   5   20.00    1.30
  10   2   5   21.80    1.70
 -11  -2  -5    1.10    0.60
 -11  -2  -5    1.60    1.20
 -11  -2  -5    1.30    1.30
  11   2   5    2.10    0.80
  11   2   5    0.70    1.10
 -12  -2  -5    1.10    1.50
 -12  -2  -5    0.50    0.70
 -12  -2  -5    0.20    1.50
  12   2   5    0.40    1.40
  12   2   5    1.10    1.60
  12   2   5    0.90    1.00
  10  -3  -5    6.50    1.90
 -10   3   5    6.20    1.80
   9  -3  -5   23.80    2.20
  -9   3   5   23.70    2.10
   8  -3  -5    0.00    1.00
   8  -3  -5   -0.10    1.20
  -8   3   5   -0.20    0.90
   7  -3  -5   23.80    1.90
   7  -3  -5   22.60    1.60
  -7   3   5   21.00    1.70
   6  -3  -5    9.60    1.10
   6  -3  -5    8.60    1.20
  -6   3   5   10.40    1.20
   5  -3  -5    2.00    0.80
   5  -3  -5    2.20    0.70
  -5   3   5    3.20    0.70
  -5   3   5    2.40    0.60
   4  -3  -5   12.70    0.90
   4  -3  -5   10.80    1.00
   4  -3  -5   10.70    0.90
  -4   3   5   10.20    1.00
  -4   3   5    8.50    0.80
  -4   3   5   10.60    0.80
   3  -3  -5    1.10    0.40
   3  -3  -5    1.40    0.50
   3  -3  -5    0.80    0.60
  -3   3   5    1.50    0.50
  -3   3   5    1.60    0.60
  -3   3   5    2.10    0.40
   2  -3  -5  283.47    7.80
   2  -3  -5  282.37    8.00
   2  -3  -5  285.67    7.80
   2  -3  -5  283.27    7.80
  -2   3   5  284.47    7.80
  -2   3   5  285.87    7.80
  -2   3   5  294.27    7.90
   1  -3  -5    2.80    0.40
   1  -3  -5    1.90    0.50
   1  -3  -5    3.40    0.50
  -1   3   5    2.80    0.50
  -1   3   5    3.70    0.40
  -1   3   5    3.30    0.40
   0  -3  -5   14.30    0.70
   0  -3  -5   15.20    0.80
   0  -3  -5   14.90    0.90
   0   3   5   16.80    0.70
   0   3   5   14.40    0.60
  -1  -3  -5  414.56   10.80
  -1  -3  -5  385.26   11.00
  -1  -3  -5  400.76   11.00
  -1  -3  -5  417.96   10.80
   1   3   5  399.16   10.80
   1   3   5  419.16   10.70
  -2  -3  -5  122.69    3.40
  -2  -3  -5  127.19    3.40
  -2  -3  -5  126.19    3.70
  -2  -3  -5  119.39    3.70
   2   3   5  122.69    3.40
  -3  -3  -5  163.88    4.90
  -3  -3  -5  172.48    4.60
  -3  -3  -5  173.58    4.60
  -3  -3  -5  179.38    4.60
  -3  -3  -5  175.78    5.00
   3   3   5  169.98    4.90
   3   3   5  170.58    4.70
   3   3   5  164.08    4.70
  -4  -3  -5  728.03   18.60
  -4  -3  -5  707.83   18.50
  -4  -3  -5  668.23   18.90
  -4  -3  -5  725.63   18.50
  -4  -3  -5  695.33   18.90
   4   3   5  727.13   18.60
   4   3   5  684.43   18.90
   4   3   5  693.83   18.60
  -5  -3  -5    1.50    0.30
  -5  -3  -5    1.40    0.60
  -5  -3  -5    2.00    0.30
  -5  -3  -5    1.30    0.40
   5   3   5    1.40    0.50
   5   3   5    1.30    0.30
  -6  -3  -5  172.28    4.80
  -6  -3  -5  170.58    4.60
  -6  -3  -5  162.28    5.10
   6   3   5  164.88    5.00
   6   3   5  171.98    4.70
  -7  -3  -5   16.50    1.30
  -7  -3  -5   16.70    0.80
  -7  -3  -5   16.70    1.10
   7   3   5   15.70    0.80
   7   3   5   16.50    1.10
  -8  -3  -5    0.20    0.70
  -8  -3  -5    0.20    0.80
  -8  -3  -5    0.30    0.40
   8   3   5    0.30    0.60
   8   3   5   -0.10    0.40
  -9  -3  -5   64.29    2.80
  -9  -3  -5   67.99    2.60
  -9  -3  -5   67.89    2.20
   9   3   5   65.89    2.70
   9   3   5   64.39    2.30
 -10  -3  -5   11.80    0.90
 -10  -3  -5   14.70    1.50
 -10  -3  -5   15.20    1.70
  10   3   5   13.40    1.40
  10   3   5   13.20    1.10
 -11  -3  -5    3.50    0.70
 -11  -3  -5    2.50    1.10
 -11  -3  -5    4.10    1.40
  11   3   5    3.70    0.80
  11   3   5    1.80    1.10
 -12  -3  -5   24.60    2.40
 -12  -3  -5   28.70    2.30
 -12  -3  -5   27.20    1.50
  12   3   5   28.50    2.30
  12   3   5   29.00    1.80
 -13  -3  -5   -0.20    0.90
 -13  -3  -5   -0.50    2.00
 -13  -3  -5    0.40    1.70
  13   3   5    0.30    1.80
  13   3   5   -0.80    1.80
  13   3   5    0.10    1.20
   9  -4  -5   15.00    2.10
  -9   4   5   19.30    2.40
   8  -4  -5    6.40    1.50
  -8   4   5    9.00    1.60
   7  -4  -5   -0.10    1.00
   7  -4  -5    0.10    1.10
  -7   4   5    0.00    1.00
   6  -4  -5   10.40    1.30
   6  -4  -5   11.90    1.40
  -6   4   5   10.80    1.30
   5  -4  -5   17.50    1.40
   5  -4  -5   16.40    1.30
  -5   4   5   15.80    1.30
   4  -4  -5   32.10    1.60
   4  -4  -5   31.00    1.50
   4  -4  -5   29.50    1.50
  -4   4   5   33.10    1.40
  -4   4   5   29.60    1.50
  -4   4   5   27.80    1.40
   3  -4  -5  172.08    4.90
   3  -4  -5  158.48    5.00
   3  -4  -5  162.98    4.90
  -3   4   5  166.28    4.80
  -3   4   5  166.68    4.80
   2  -4  -5    7.20    0.80
   2  -4  -5    9.70    0.80
  -2   4   5    9.20    0.70
  -2   4   5    9.10    0.70
  -2   4   5    8.00    0.80
   1  -4  -5    0.00    0.30
   1  -4  -5    0.10    0.40
   1  -4  -5    0.00    0.40
   1  -4  -5    0.30    0.40
  -1   4   5    0.30    0.50
  -1   4   5    0.50    0.30
  -1   4   5    0.10    0.30
   0  -4  -5   18.60    1.00
   0  -4  -5   20.00    0.90
   0  -4  -5   22.80    1.00
   0   4   5   22.20    0.90
   0   4   5   22.10    0.80
   0   4   5   22.30    1.00
  -1  -4  -5   35.40    1.30
  -1  -4  -5   39.70    1.50
  -1  -4  -5   35.10    1.40
   1   4   5   39.30    1.40
   1   4   5   38.10    1.30
  -2  -4  -5  273.67    7.70
  -2  -4  -5  277.07    7.50
  -2  -4  -5  273.57    7.80
  -2  -4  -5  287.77    7.50
   2   4   5  282.47    7.50
  -3  -4  -5  393.46   10.60
  -3  -4  -5  396.66   10.90
  -3  -4  -5  409.96   11.00
   3   4   5  390.86   10.80
   3   4   5  399.46   10.60
  -4  -4  -5  152.28    4.60
  -4  -4  -5  160.98    4.30
  -4  -4  -5  151.88    4.70
  -4  -4  -5  152.08    4.30
  -4  -4  -5  160.18    4.20
   4   4   5  156.98    4.60
   4   4   5  154.18    4.30
  -5  -4  -5  193.58    6.00
  -5  -4  -5  211.88    5.60
  -5  -4  -5  210.38    5.60
  -5  -4  -5  204.88    5.60
   5   4   5  202.88    5.90
   5   4   5  199.58    5.60
  -6  -4  -5  250.07    7.20
  -6  -4  -5  240.18    6.70
  -6  -4  -5  254.57    6.80
   6   4   5  241.68    6.70
   6   4   5  243.88    7.00
  -7  -4  -5    5.10    0.90
  -7  -4  -5    5.30    0.70
  -7  -4  -5    3.70    0.50
   7   4   5    4.20    0.50
   7   4   5    4.40    0.80
  -8  -4  -5    9.90    1.00
  -8  -4  -5    9.00    0.70
  -8  -4  -5    7.40    1.10
   8   4   5   11.30    1.10
   8   4   5    9.70    0.80
  -9  -4  -5    1.90    0.50
  -9  -4  -5    2.10    1.00
  -9  -4  -5    2.20    0.80
   9   4   5    2.10    0.60
   9   4   5    2.30    0.90
 -10  -4  -5    6.00    0.70
 -10  -4  -5    5.80    1.30
 -10  -4  -5    5.40    1.00
  10   4   5    5.60    0.80
  10   4   5    5.70    1.20
 -11  -4  -5    7.20    1.30
 -11  -4  -5    5.10    1.30
 -11  -4  -5    6.80    0.80
  11   4   5    6.30    0.90
  11   4   5    6.00    1.30
 -12  -4  -5   59.19    3.10
 -12  -4  -5   57.59    2.20
 -12  -4  -5   57.09    2.80
  12   4   5   57.89    2.90
  12   4   5   57.99    2.50
 -13  -4  -5   24.00    2.90
 -13  -4  -5   22.20    1.60
  13   4   5   29.10    2.60
  13   4   5   23.20    2.00
   9  -5  -5   -0.40    1.80
  -9   5   5   -0.10    1.80
   8  -5  -5    0.70    1.40
  -8   5   5    0.50    1.40
   7  -5  -5   16.60    1.70
  -7   5   5   15.50    1.90
   6  -5  -5    2.20    1.10
   6  -5  -5    2.70    1.00
  -6   5   5    2.20    1.10
   5  -5  -5   44.60    2.10
   5  -5  -5   45.50    2.10
  -5   5   5   43.10    2.00
   4  -5  -5   13.80    1.20
   4  -5  -5   15.70    1.30
   4  -5  -5   13.80    1.30
  -4   5   5   10.80    1.20
  -4   5   5   13.20    1.20
   3  -5  -5    8.00    0.90
   3  -5  -5    7.70    1.00
   3  -5  -5    7.50    1.00
  -3   5   5    7.00    0.90
  -3   5   5    8.40    0.80
  -3   5   5    8.30    0.90
   2  -5  -5  113.69    3.60
   2  -5  -5  116.79    3.70
   2  -5  -5  112.99    3.60
  -2   5   5  115.49    3.60
  -2   5   5  117.79    3.50
  -2   5   5  116.89    3.50
   1  -5  -5   21.10    1.10
   1  -5  -5   20.20    1.00
   1  -5  -5   25.50    1.30
  -1   5   5   25.60    1.10
  -1   5   5   21.50    1.00
  -1   5   5   21.30    1.20
   0  -5  -5   38.30    1.50
   0  -5  -5   38.00    1.60
   0  -5  -5   38.80    1.60
   0   5   5   40.10    1.40
   0   5   5   38.90    1.30
   0   5   5   38.80    1.50
  -1  -5  -5    6.40    0.70
  -1  -5  -5    4.10    0.60
  -1  -5  -5    4.10    0.50
  -1  -5  -5    4.30    0.60
   1   5   5    3.30    0.40
   1   5   5    3.40    0.50
   1   5   5    4.10    0.40
  -2  -5  -5   61.59    2.00
  -2  -5  -5   63.19    2.20
  -2  -5  -5   62.69    2.20
   2   5   5   62.19    2.00
   2   5   5   66.29    2.10
  -3  -5  -5  211.48    5.80
  -3  -5  -5  198.68    6.00
  -3  -5  -5  217.18    6.10
   3   5   5  207.08    5.80
   3   5   5  212.58    6.00
   3   5   5  218.28    5.90
  -4  -5  -5   13.50    0.70
  -4  -5  -5   12.80    0.90
  -4  -5  -5   13.80    1.00
   4   5   5   13.30    0.90
   4   5   5   14.40    0.70
  -5  -5  -5    0.90    0.50
  -5  -5  -5    1.70    0.40
  -5  -5  -5    1.10    0.30
   5   5   5    1.20    0.40
   5   5   5    1.10    0.50
  -6  -5  -5   13.60    0.80
  -6  -5  -5   14.10    0.80
  -6  -5  -5   14.00    1.10
   6   5   5   13.90    0.80
   6   5   5   13.40    1.00
  -7  -5  -5    8.60    1.00
  -7  -5  -5    8.30    0.80
  -7  -5  -5    7.40    0.70
   7   5   5    6.80    0.90
   7   5   5    7.60    0.70
  -8  -5  -5   22.90    1.30
  -8  -5  -5   21.30    1.00
  -8  -5  -5   19.20    1.50
   8   5   5   19.10    1.30
   8   5   5   19.80    1.10
  -9  -5  -5   64.19    2.20
  -9  -5  -5   67.29    2.50
  -9  -5  -5   65.59    2.80
   9   5   5   62.09    2.30
   9   5   5   67.89    2.70
 -10  -5  -5    5.00    0.70
 -10  -5  -5    6.10    1.20
  10   5   5    5.60    0.80
  10   5   5    7.10    1.20
 -11  -5  -5    1.40    0.70
 -11  -5  -5    1.50    1.30
  11   5   5    1.70    0.80
  11   5   5    2.20    1.10
 -12  -5  -5    8.40    1.00
 -12  -5  -5   12.50    1.90
  12   5   5   10.70    1.70
 -13  -5  -5   29.50    2.70
 -13  -5  -5   29.30    1.70
  13   5   5   26.40    2.30
  13   5   5   31.90    2.60
  -8   6   5    6.20    1.70
  -7   6   5   -0.10    1.20
   6  -6  -5    0.00    1.10
  -6   6   5    0.20    1.10
   5  -6  -5   17.10    1.70
   5  -6  -5   19.40    1.70
   5  -6  -5   15.90    1.60
  -5   6   5   19.30    1.60
   4  -6  -5   81.29    3.00
   4  -6  -5   86.39    3.20
   4  -6  -5   83.39    3.10
  -4   6   5   80.59    3.10
  -4   6   5   87.79    3.10
   3  -6  -5   37.60    1.80
   3  -6  -5   38.90    1.70
   3  -6  -5   35.70    1.80
  -3   6   5   34.40    1.70
  -3   6   5   38.60    1.80
   2  -6  -5   17.20    1.30
   2  -6  -5   15.70    1.20
   2  -6  -5   16.50    1.30
  -2   6   5   20.80    1.10
  -2   6   5   18.10    1.30
  -2   6   5   17.10    1.10
   1  -6  -5    0.20    0.50
   1  -6  -5    0.00    0.60
   1  -6  -5    0.20    0.60
  -1   6   5    0.20    0.40
  -1   6   5    0.10    0.50
  -1   6   5    0.40    0.50
   0  -6  -5   60.89    2.20
   0  -6  -5   60.19    2.10
   0  -6  -5   64.89    2.40
   0   6   5   62.39    2.10
  -1  -6  -5  329.17    9.20
  -1  -6  -5  319.37    8.90
  -1  -6  -5  317.47    9.00
   1   6   5  326.67    8.90
   1   6   5  334.17    9.00
  -2  -6  -5    4.70    0.60
  -2  -6  -5    5.10    0.70
  -2  -6  -5    6.00    0.80
   2   6   5    4.70    0.70
  -3  -6  -5    2.40    0.60
  -3  -6  -5    2.40    0.40
  -3  -6  -5    2.00    0.60
   3   6   5    2.90    0.60
   3   6   5    3.10    0.50
   3   6   5    2.30    0.60
  -4  -6  -5   24.70    1.40
  -4  -6  -5   22.80    1.20
  -4  -6  -5   21.10    1.00
   4   6   5   22.90    1.20
  -5  -6  -5   42.30    1.60
   5   6   5   46.30    1.80
   5   6   5   43.60    1.60
  -6  -6  -5   40.80    1.90
  -6  -6  -5   41.60    1.50
   6   6   5   42.90    1.80
   6   6   5   43.10    1.60
  -7  -6  -5   -0.10    0.40
  -7  -6  -5    0.40    0.70
   7   6   5    0.00    0.40
   7   6   5    0.00    0.60
  -8  -6  -5    0.20    0.70
  -8  -6  -5    0.10    0.50
   8   6   5   -0.10    0.70
   8   6   5    0.30    0.50
  -9  -6  -5  100.29    3.80
  -9  -6  -5  105.69    3.30
   9   6   5  105.19    3.70
   9   6   5  101.69    3.30
 -10  -6  -5   55.89    2.70
 -10  -6  -5   55.49    2.10
  10   6   5   58.09    2.20
  10   6   5   54.49    2.50
 -11  -6  -5   14.80    1.80
 -11  -6  -5   17.60    1.30
  11   6   5   17.90    1.40
  11   6   5   15.60    1.70
 -12  -6  -5    7.70    1.00
 -12  -6  -5    8.80    1.80
  12   6   5    7.10    1.50
  12   6   5   10.70    1.30
 -13  -6  -5    0.60    1.60
 -13  -6  -5    0.20    1.00
  13   6   5    1.20    1.50
   5  -7  -5    5.30    1.40
  -5   7   5    5.40    1.40
   4  -7  -5   52.19    2.50
  -4   7   5   46.10    2.30
   3  -7  -5    0.20    0.80
   3  -7  -5    0.60    0.80
   3  -7  -5    0.00    0.80
  -3   7   5   -0.10    0.80
   2  -7  -5   14.00    1.20
   2  -7  -5   17.10    1.30
   2  -7  -5   15.40    1.30
  -2   7   5   17.90    1.40
   1  -7  -5   16.50    1.30
   1  -7  -5   17.00    1.20
   1  -7  -5   15.90    1.20
  -1   7   5   16.20    1.30
  -1   7   5   16.30    1.30
   0  -7  -5  245.58    7.00
   0  -7  -5  234.98    7.20
   0  -7  -5  240.08    7.00
   0   7   5  246.28    7.00
   0   7   5  251.17    6.90
  -1  -7  -5  184.38    5.50
  -1  -7  -5  174.48    5.20
  -1  -7  -5  171.08    5.20
   1   7   5  177.38    5.10
   1   7   5  176.98    5.20
  -2  -7  -5    7.10    0.90
  -2  -7  -5    6.70    0.70
  -2  -7  -5    7.00    0.90
   2   7   5    7.50    0.70
   2   7   5    8.10    0.90
  -3  -7  -5    1.50    0.60
  -3  -7  -5    1.10    0.50
  -3  -7  -5    2.10    0.70
   3   7   5    1.70    0.60
   3   7   5    1.60    0.50
  -4  -7  -5   31.20    1.40
  -4  -7  -5   32.00    1.50
  -4  -7  -5   31.30    1.60
   4   7   5   35.10    1.50
   4   7   5   34.30    1.30
  -5  -7  -5   55.49    2.30
  -5  -7  -5   54.69    2.00
   5   7   5   58.29    2.00
   5   7   5   59.19    2.20
  -6  -7  -5   36.50    1.40
  -6  -7  -5   32.80    1.70
   6   7   5   31.70    1.60
   6   7   5   36.70    1.50
  -7  -7  -5    1.40    0.80
  -7  -7  -5    2.00    0.60
   7   7   5    2.60    0.60
   7   7   5    1.80    0.70
  -8  -7  -5    8.70    1.20
  -8  -7  -5   10.20    1.00
   8   7   5   10.60    1.10
   8   7   5    8.70    0.90
  -9  -7  -5   18.40    1.20
  -9  -7  -5   18.40    1.60
   9   7   5   17.60    1.20
   9   7   5   15.60    1.40
 -10  -7  -5   20.80    1.80
 -10  -7  -5   19.10    1.30
  10   7   5   22.20    1.50
  10   7   5   20.70    1.70
 -11  -7  -5    5.20    1.50
 -11  -7  -5    3.00    0.80
  11   7   5    3.50    1.20
  11   7   5    3.60    0.90
 -12  -7  -5   47.80    2.20
 -12  -7  -5   59.39    3.20
  12   7   5   47.90    2.70
 -13  -7  -5    2.80    1.10
 -13  -7  -5    4.20    1.80
  13   7   5    3.90    1.80
  -6   8   5   10.40    1.60
   5  -8  -5   10.30    1.60
  -5   8   5   11.80    1.50
   4  -8  -5   24.50    2.10
  -4   8   5   23.20    1.70
   3  -8  -5    5.40    1.20
  -3   8   5    4.60    1.00
   2  -8  -5   48.30    2.20
   2  -8  -5   45.40    2.30
  -2   8   5   47.90    2.20
   1  -8  -5    3.20    1.00
   1  -8  -5    1.20    0.80
  -1   8   5    2.40    0.90
   0  -8  -5   20.10    1.50
   0  -8  -5   23.90    1.40
   0   8   5   21.30    1.50
  -1  -8  -5   81.29    2.80
  -1  -8  -5   83.89    2.80
  -1  -8  -5   83.99    3.10
   1   8   5   86.69    2.80
   1   8   5   75.19    2.90
  -2  -8  -5    7.20    0.90
  -2  -8  -5    5.30    0.90
  -2  -8  -5    5.90    0.80
   2   8   5    6.80    0.70
  -3  -8  -5  119.79    4.00
  -3  -8  -5  116.19    3.70
  -3  -8  -5  120.49    3.70
   3   8   5  123.09    3.70
   3   8   5  118.49    3.60
  -4  -8  -5   13.10    1.10
  -4  -8  -5   13.10    1.00
  -4  -8  -5   13.30    1.20
   4   8   5   15.20    1.00
   4   8   5   13.20    1.10
  -5  -8  -5   17.70    1.30
  -5  -8  -5   16.20    1.10
   5   8   5   18.50    1.20
   5   8   5   16.30    1.10
  -6  -8  -5  124.09    4.20
  -6  -8  -5  123.99    3.90
   6   8   5  126.39    4.00
   6   8   5  127.79    3.80
  -7  -8  -5   33.90    1.50
  -7  -8  -5   36.80    1.90
   7   8   5   35.60    1.60
   7   8   5   34.50    1.70
  -8  -8  -5   96.19    3.10
  -8  -8  -5   97.99    3.60
   8   8   5   91.19    3.30
   8   8   5   94.59    3.10
  -9  -8  -5   60.69    2.30
  -9  -8  -5   64.89    2.80
   9   8   5   63.29    2.70
   9   8   5   63.59    2.40
 -10  -8  -5    3.30    1.20
 -10  -8  -5    3.10    0.80
  10   8   5    4.40    1.10
  10   8   5    3.30    0.90
 -11  -8  -5    1.70    1.40
 -11  -8  -5    1.50    0.80
  11   8   5    0.70    1.10
 -12  -8  -5    0.40    0.90
 -12  -8  -5    0.00    1.50
  12   8   5    0.40    1.40
 -13  -8  -5   12.20    2.20
 -13  -8  -5   10.50    1.40
  13   8   5   12.20    2.00
  -5   9   5   13.70    1.80
   4  -9  -5    1.20    1.30
  -4   9   5    0.80    1.10
   3  -9  -5    2.10    1.20
  -3   9   5    2.70    1.20
   2  -9  -5   36.20    2.20
  -2   9   5   41.90    2.20
   1  -9  -5   62.89    2.70
   1  -9  -5   57.89    2.70
  -1   9   5   57.99    2.50
   0  -9  -5   41.90    2.20
   0  -9  -5   43.60    2.10
   0   9   5   39.80    2.20
  -1  -9  -5    8.20    1.30
  -1  -9  -5    8.80    1.10
  -2  -9  -5    6.90    1.00
  -2  -9  -5    6.90    1.10
  -3  -9  -5   25.60    1.50
  -3  -9  -5   24.30    1.60
  -4  -9  -5    9.10    1.20
  -4  -9  -5    9.60    1.20
  -4  -9  -5   10.00    1.10
   4   9   5   10.30    1.10
   4   9   5   10.20    1.10
  -5  -9  -5   11.20    1.10
  -5  -9  -5   10.80    1.30
   5   9   5   10.40    1.00
   5   9   5   10.80    1.10
  -6  -9  -5   24.20    1.70
  -6  -9  -5   23.70    1.40
   6   9   5   24.00    1.40
   6   9   5   22.40    1.40
  -7  -9  -5    2.20    0.90
  -7  -9  -5    2.40    0.70
   7   9   5    2.50    0.90
   7   9   5    1.90    0.70
  -8  -9  -5   16.60    1.60
  -8  -9  -5   16.60    1.30
   8   9   5   16.70    1.50
   8   9   5   20.20    1.40
  -9  -9  -5    0.90    0.80
  -9  -9  -5    1.60    1.10
   9   9   5    1.70    1.00
 -10  -9  -5    0.00    0.80
 -10  -9  -5    0.30    1.20
  10   9   5   -0.30    1.10
 -11  -9  -5    9.70    1.80
 -11  -9  -5   11.70    1.30
  11   9   5    8.60    1.40
 -12  -9  -5    5.10    1.70
 -12  -9  -5    5.30    1.10
  12   9   5    2.90    1.50
 -13  -9  -5    1.30    1.80
  13   9   5    1.10    1.60
   4 -10  -5    1.90    1.70
  -4  10   5    3.20    1.60
   3 -10  -5   10.60    1.70
  -3  10   5   15.00    1.70
   2 -10  -5    9.60    1.70
  -2  10   5   10.10    1.50
   1 -10  -5    8.50    1.40
  -1  10   5    9.40    1.30
   0 -10  -5    0.90    1.10
  -1 -10  -5   16.90    1.60
  -1 -10  -5   16.90    1.70
  -2 -10  -5   76.39    2.90
  -2 -10  -5   70.29    3.10
  -3 -10  -5    4.70    1.00
  -3 -10  -5    3.10    1.10
  -4 -10  -5    0.40    0.70
  -4 -10  -5    0.90    0.90
  -5 -10  -5    5.00    1.10
  -5 -10  -5    4.50    0.90
  -6 -10  -5   41.40    1.90
  -6 -10  -5   39.30    2.20
  -7 -10  -5   13.90    1.60
  -7 -10  -5   14.70    1.40
  -8 -10  -5    0.20    1.10
  -8 -10  -5   -0.30    0.80
   8  10   5    0.00    0.90
  -9 -10  -5   -0.20    1.00
  -9 -10  -5    0.00    0.80
   9  10   5    0.20    1.00
 -10 -10  -5    0.90    0.90
 -10 -10  -5    0.70    1.20
  10  10   5    1.40    1.20
 -11 -10  -5   27.80    2.70
 -11 -10  -5   30.50    1.90
  11  10   5   26.20    2.30
 -12 -10  -5   14.70    1.60
 -12 -10  -5   17.50    2.40
  12  10   5   15.00    1.90
   3 -11  -5    9.60    2.10
  -3  11   5    7.90    1.80
   2 -11  -5    2.80    1.70
  -2  11   5    4.40    1.50
   1 -11  -5    5.20    1.50
  -1  11   5    5.40    1.30
   0 -11  -5    1.50    1.20
  -1 -11  -5    0.40    1.10
  -2 -11  -5   40.90    2.60
  -3 -11  -5   82.29    3.50
  -3 -11  -5   81.49    3.20
  -4 -11  -5    6.60    1.10
  -4 -11  -5    8.80    1.50
  -5 -11  -5    8.50    1.40
  -5 -11  -5    8.40    1.20
  -6 -11  -5    0.00    0.90
  -6 -11  -5    0.70    1.00
  -7 -11  -5   35.40    2.30
  -7 -11  -5   34.10    1.90
  -8 -11  -5   38.60    2.40
  -8 -11  -5   41.60    2.10
  -9 -11  -5    0.70    1.00
  -9 -11  -5   -0.10    1.20
 -10 -11  -5   21.00    1.80
 -10 -11  -5   17.10    2.10
 -11 -11  -5    1.50    1.20
 -11 -11  -5    1.50    1.70
 -12 -11  -5    5.10    1.40
 -12 -11  -5    6.90    2.20
   1 -12  -5    0.80    1.50
  -1  12   5    0.80    1.50
   0 -12  -5    3.80    1.60
   0  12   5    2.20    1.70
  -1 -12  -5   10.60    1.80
  -2 -12  -5    5.00    1.50
  -3 -12  -5   10.10    1.70
  -4 -12  -5   14.20    2.00
  -5 -12  -5    9.60    1.40
  -5 -12  -5    6.70    1.50
  -6 -12  -5   18.60    1.80
  -6 -12  -5   16.50    1.90
  -7 -12  -5    2.90    1.10
  -7 -12  -5    3.20    1.50
  -8 -12  -5  129.59    5.10
  -8 -12  -5  125.59    4.40
  -9 -12  -5   59.19    2.80
 -10 -12  -5   19.00    2.00
 -10 -12  -5   17.00    2.30
 -11 -12  -5    2.60    1.40
 -11 -12  -5    1.40    2.00
  -1 -13  -5   10.00    2.00
  -2 -13  -5   -0.70    1.50
  -3 -13  -5   13.60    2.20
  -4 -13  -5    9.30    1.90
  -5 -13  -5   49.40    3.10
  -6 -13  -5   15.80    2.10
  -7 -13  -5  112.19    4.70
  -8 -13  -5  172.48    5.80
  -8 -13  -5  173.08    6.30
  -9 -13  -5    4.60    1.50
  -9 -13  -5    5.40    1.80
 -10 -13  -5    3.90    1.60
 -10 -13  -5    5.20    2.00
   8  11  -6   -0.10    0.90
  -8 -11   6    1.60    1.30
   7  11  -6    0.30    0.70
  -7 -11   6    0.30    1.20
  -7 -11   6   -0.40    1.40
   6  11  -6    1.90    0.60
  -6 -11   6    2.70    1.50
  -6 -11   6    1.90    1.10
  -5 -11   6    3.70    1.10
  -5 -11   6    1.00    1.60
  -4 -11   6    1.20    0.90
  -4 -11   6    1.00    1.50
  -3 -11   6    8.90    1.20
  -3 -11   6   10.10    1.70
   2  11  -6    1.00    1.60
  -2 -11   6    1.10    1.50
  -2 -11   6    0.90    1.00
   1  11  -6  104.29    4.60
  -1 -11   6   99.59    3.60
  -1 -11   6   96.49    4.40
  -1 -11   6  102.69    4.60
   0 -11   6    0.60    2.00
   9  10  -6    0.70    0.90
  -9 -10   6    1.10    1.20
  -9 -10   6    1.10    1.50
   8  10  -6   49.30    2.10
  -8 -10   6   52.49    2.50
  -8 -10   6   49.70    3.10
   7  10  -6   14.70    1.20
  -7 -10   6   16.60    1.60
  -7 -10   6   15.70    1.90
   6  10  -6    7.70    0.90
  -6 -10   6    6.80    1.10
  -6 -10   6    6.50    1.40
   5  10  -6    5.30    0.50
  -5 -10   6    5.50    1.00
  -5 -10   6    5.40    1.40
  -4 -10   6    0.40    1.10
  -4 -10   6    0.60    0.80
   3  10  -6    0.30    1.20
  -3 -10   6    0.30    0.70
  -3 -10   6    0.20    1.10
   2  10  -6    7.20    1.50
  -2 -10   6    7.50    1.50
  -2 -10   6    8.00    1.00
   1  10  -6    0.30    1.30
  -1 -10   6    0.70    1.30
  -1 -10   6    1.30    1.30
  -1 -10   6    1.00    0.80
   0  10  -6    7.10    1.60
   0 -10   6    6.90    1.70
   0 -10   6    6.90    1.00
   0 -10   6    8.00    1.80
  -1  10  -6    4.70    1.70
   1 -10   6    4.00    1.80
   1 -10   6    3.60    1.50
   1 -10   6    3.60    1.00
   2 -10   6   26.40    2.80
   2 -10   6   24.70    2.60
  10   9  -6    0.50    1.00
 -10  -9   6    0.10    1.40
   9   9  -6    4.40    1.00
  -9  -9   6    6.10    1.20
  -9  -9   6    4.30    1.40
   8   9  -6    9.00    1.00
  -8  -9   6    8.80    1.50
  -8  -9   6   10.70    1.30
   7   9  -6    2.80    0.70
  -7  -9   6    2.60    1.20
  -7  -9   6    4.40    1.00
   6   9  -6    3.50    0.60
  -6  -9   6    4.80    1.30
  -6  -9   6    3.30    0.80
   5   9  -6   24.10    1.00
  -5  -9   6   26.70    1.50
  -5  -9   6   25.60    1.90
  -4  -9   6   48.10    2.40
  -4  -9   6   43.70    1.90
   3   9  -6   13.50    1.60
  -3  -9   6   11.40    1.10
  -3  -9   6   13.50    1.60
   2   9  -6   17.20    1.70
  -2  -9   6   16.10    1.70
  -2  -9   6   15.80    1.20
   1   9  -6    1.20    1.10
  -1  -9   6    1.90    0.70
  -1  -9   6    1.50    1.10
  -1  -9   6    1.20    1.20
   0   9  -6    8.50    1.50
   0  -9   6    8.80    1.40
   0  -9   6   11.90    1.70
   0  -9   6    9.10    0.90
  -1   9  -6    1.20    1.20
   1  -9   6    1.20    1.30
   1  -9   6    1.00    0.70
  -2   9  -6   27.30    2.50
   2  -9   6   25.80    1.50
   2  -9   6   27.20    2.40
  -3   9  -6    2.30    1.60
   3  -9   6    3.40    0.90
   3  -9   6    3.30    1.70
  10   8  -6    5.90    1.20
 -10  -8   6    5.00    1.50
   9   8  -6    3.30    0.90
  -9  -8   6    4.20    1.30
  -9  -8   6    3.20    1.00
   8   8  -6   41.10    1.80
  -8  -8   6   34.50    2.20
  -8  -8   6   40.50    1.90
   7   8  -6    1.90    0.70
  -7  -8   6    1.80    0.80
  -7  -8   6    2.50    1.20
   6   8  -6   -0.20    0.50
  -6  -8   6   -0.30    0.60
  -6  -8   6   -0.10    0.90
   5   8  -6   11.10    0.80
  -5  -8   6   13.10    1.10
  -5  -8   6   12.70    1.50
  -4  -8   6   66.09    2.30
  -4  -8   6   66.49    2.80
  -3  -8   6    2.10    0.60
  -3  -8   6    2.60    0.90
   2   8  -6    0.00    0.90
  -2  -8   6   -0.20    0.50
  -2  -8   6    0.00    0.90
  -2  -8   6    0.50    1.00
   1   8  -6    5.60    1.10
  -1  -8   6    5.50    1.20
  -1  -8   6    4.70    0.70
  -1  -8   6    6.20    1.10
   0   8  -6   40.10    2.30
   0  -8   6   40.50    1.60
   0  -8   6   38.70    2.30
   0  -8   6   31.90    2.20
  -1   8  -6   43.40    2.40
   1  -8   6   39.30    1.70
   1  -8   6   44.70    2.60
  -2   8  -6   11.80    1.60
   2  -8   6   11.70    1.70
   2  -8   6   12.40    1.10
  -3   8  -6   -0.30    1.20
   3  -8   6   -0.40    0.60
   3  -8   6    0.50    1.40
  -4   8  -6   32.60    2.50
   4  -8   6   31.20    1.70
   4  -8   6   33.20    2.60
  -5   8  -6   13.40    2.30
   5  -8   6    9.30    2.00
   5  -8   6    9.30    1.10
  11   7  -6    2.30    1.20
 -11  -7   6    1.80    1.40
  10   7  -6   15.50    1.60
 -10  -7   6   15.70    1.90
   9   7  -6    1.00    0.80
  -9  -7   6    0.60    1.10
  -9  -7   6    0.60    0.80
   8   7  -6    0.80    0.70
  -8  -7   6    0.20    0.90
  -8  -7   6    1.30    0.80
   7   7  -6    0.00    0.60
  -7  -7   6    0.30    0.90
  -7  -7   6   -0.40    0.60
   6   7  -6    0.20    0.50
  -6  -7   6   -0.10    0.80
  -6  -7   6    0.10    0.60
   5   7  -6   43.70    1.50
  -5  -7   6   44.10    1.70
  -5  -7   6   47.30    2.20
   4   7  -6   44.00    1.40
  -4  -7   6   48.00    2.20
  -4  -7   6   46.50    1.70
  -3  -7   6    4.90    0.90
  -3  -7   6    5.60    0.60
   2   7  -6   37.60    2.10
  -2  -7   6   37.40    1.90
  -2  -7   6   35.00    1.40
  -2  -7   6   39.40    2.00
   1   7  -6   14.60    1.40
  -1  -7   6   13.60    1.30
  -1  -7   6   11.60    1.30
  -1  -7   6   13.50    0.90
   0   7  -6   56.89    2.50
   0  -7   6   57.29    2.50
   0  -7   6   60.69    2.50
   0  -7   6   59.79    2.00
  -1   7  -6    1.90    0.90
   1  -7   6    1.50    0.50
   1  -7   6    1.30    0.90
  -2   7  -6    6.00    1.20
   2  -7   6    4.50    0.60
   2  -7   6    7.10    1.30
  -3   7  -6    5.70    1.20
   3  -7   6    3.80    0.60
   3  -7   6    5.70    1.30
  -4   7  -6   -0.20    1.10
   4  -7   6    1.40    0.70
   4  -7   6    1.30    1.30
  -5   7  -6   11.10    1.70
   5  -7   6   14.20    1.90
   5  -7   6   14.10    1.20
  -6   7  -6   26.10    2.70
   6  -7   6   22.40    1.70
   6  -7   6   27.30    2.60
  11   6  -6    2.90    1.70
  11   6  -6    4.50    1.30
 -11  -6   6    2.90    1.40
  10   6  -6   35.60    2.00
  10   6  -6   32.80    2.50
 -10  -6   6   35.80    2.40
   9   6  -6    0.10    0.80
   9   6  -6    0.20    1.20
  -9  -6   6    0.10    0.80
  -9  -6   6    0.20    1.10
   8   6  -6   37.90    1.70
   8   6  -6   37.00    2.10
  -8  -6   6   42.70    1.80
  -8  -6   6   37.90    2.10
   7   6  -6   21.40    1.20
   7   6  -6   19.70    1.60
  -7  -6   6   19.20    1.20
  -7  -6   6   22.00    1.60
   6   6  -6    8.50    0.80
  -6  -6   6    8.60    1.10
  -6  -6   6    7.00    0.80
   5   6  -6    6.60    0.60
  -5  -6   6    5.70    0.70
  -5  -6   6    5.40    1.00
   4   6  -6   46.20    1.40
  -4  -6   6   45.90    2.10
  -4  -6   6   47.90    1.70
  -3  -6   6   12.00    0.80
  -3  -6   6   12.40    1.20
   2   6  -6   36.50    1.90
  -2  -6   6   35.40    1.70
  -2  -6   6   37.10    1.90
  -2  -6   6   37.60    1.40
   1   6  -6    6.70    1.00
  -1  -6   6    7.00    0.60
  -1  -6   6    7.70    1.00
  -1  -6   6    6.00    1.00
   0   6  -6    0.80    0.70
   0  -6   6    1.20    0.70
   0  -6   6    1.40    0.40
   0  -6   6    1.00    0.70
  -1   6  -6    3.80    0.90
   1  -6   6    2.50    0.40
   1  -6   6    3.10    0.90
  -2   6  -6    3.50    1.00
   2  -6   6    3.80    0.50
   2  -6   6    3.70    1.10
  -3   6  -6    0.60    0.90
   3  -6   6    0.60    0.50
   3  -6   6    0.40    0.90
  -4   6  -6    5.70    1.20
   4  -6   6    7.90    0.90
   4  -6   6    7.50    1.40
  -5   6  -6    1.90    1.10
   5  -6   6    1.60    0.60
   5  -6   6    2.00    1.20
  -6   6  -6    2.90    1.30
   6  -6   6    0.60    1.50
   6  -6   6    2.10    0.70
  -7   6  -6    2.40    1.50
   7  -6   6    1.10    0.90
   7  -6   6    1.00    1.60
  11   5  -6   10.90    1.90
  11   5  -6   12.50    1.60
 -11  -5   6   11.80    1.80
  10   5  -6    2.40    1.40
  10   5  -6    2.80    1.00
 -10  -5   6    2.50    1.20
   9   5  -6    5.80    1.00
   9   5  -6    7.80    1.30
  -9  -5   6    8.20    1.10
  -9  -5   6    7.40    1.20
   8   5  -6   37.70    2.20
   8   5  -6   40.50    1.80
  -8  -5   6   41.00    1.80
  -8  -5   6   40.60    2.20
   7   5  -6    5.60    0.70
   7   5  -6    5.40    1.10
  -7  -5   6    8.60    0.90
  -7  -5   6    6.00    1.00
   6   5  -6   56.79    2.30
   6   5  -6   52.09    1.90
  -6  -5   6   50.89    2.30
  -6  -5   6   57.09    2.00
   5   5  -6   93.09    3.10
   5   5  -6   95.79    2.80
  -5  -5   6   89.49    3.20
  -5  -5   6   94.99    2.90
   4   5  -6    8.00    0.90
   4   5  -6    6.20    0.50
  -4  -5   6    7.40    0.70
  -4  -5   6    6.90    0.90
  -3  -5   6    8.30    1.00
  -3  -5   6    8.00    0.60
   2   5  -6  169.18    5.20
  -2  -5   6  166.78    4.70
  -2  -5   6  168.38    5.10
  -2  -5   6  167.78    5.00
   1   5  -6   85.89    3.00
  -1  -5   6   83.49    2.90
  -1  -5   6   88.39    3.00
  -1  -5   6   87.49    2.50
   0   5  -6    0.20    0.60
   0  -5   6    0.10    0.70
   0  -5   6   -0.20    0.30
   0  -5   6   -0.10    0.60
  -1   5  -6   52.49    2.20
   1  -5   6   55.29    2.20
   1  -5   6   52.99    1.70
  -2   5  -6  129.39    4.30
   2  -5   6  136.19    4.40
   2  -5   6  132.79    3.80
  -3   5  -6   24.90    1.60
   3  -5   6   26.50    1.80
   3  -5   6   25.20    1.10
  -4   5  -6   32.80    2.00
   4  -5   6   30.10    1.30
   4  -5   6   31.70    2.00
  -5   5  -6    2.40    1.00
   5  -5   6    2.30    1.10
   5  -5   6    1.70    0.50
  -6   5  -6   30.40    2.10
   6  -5   6   29.80    1.50
   6  -5   6   29.50    2.40
  -7   5  -6   -0.20    1.30
   7  -5   6    0.30    1.30
   7  -5   6    0.40    0.70
  -8   5  -6    5.90    1.60
   8  -5   6    5.40    1.80
   8  -5   6    5.40    1.00
  12   4  -6   26.90    2.50
  11   4  -6   23.20    2.30
  11   4  -6   25.50    2.10
 -11  -4   6   23.50    2.20
  10   4  -6    1.70    1.00
  10   4  -6    1.50    1.20
 -10  -4   6    0.80    1.10
   9   4  -6   -0.20    0.80
   9   4  -6    0.40    1.00
  -9  -4   6    0.20    0.80
  -9  -4   6   -0.20    0.90
   8   4  -6   44.30    2.30
   8   4  -6   52.09    2.10
  -8  -4   6   53.59    2.40
  -8  -4   6   51.19    2.00
   7   4  -6    7.20    1.10
   7   4  -6    7.60    0.90
  -7  -4   6    6.50    0.80
  -7  -4   6    9.30    1.10
   6   4  -6   11.30    0.90
   6   4  -6   10.40    1.20
  -6  -4   6   10.60    0.80
  -6  -4   6   10.50    1.10
   5   4  -6    5.50    0.90
   5   4  -6    6.80    0.60
  -5  -4   6    5.90    0.80
  -5  -4   6    5.50    0.60
   4   4  -6    8.00    0.90
   4   4  -6    9.00    0.60
  -4  -4   6   11.10    1.00
  -4  -4   6    8.80    0.70
   3   4  -6   55.49    2.00
  -3  -4   6   51.89    1.70
  -3  -4   6   53.99    2.10
   2   4  -6   10.30    0.80
  -2  -4   6    9.60    0.80
  -2  -4   6   10.10    0.60
  -2  -4   6    8.30    0.90
   1   4  -6   26.50    1.40
   1   4  -6   27.10    1.20
  -1  -4   6   25.30    0.90
  -1  -4   6   24.80    1.30
  -1  -4   6   25.90    1.30
   0   4  -6    0.00    0.40
   0   4  -6   -0.10    0.60
   0  -4   6    0.10    0.50
   0  -4   6    0.10    0.60
   0  -4   6    0.20    0.20
  -1   4  -6   28.90    1.50
   1  -4   6   25.70    1.50
   1  -4   6   30.20    1.00
  -2   4  -6   89.69    3.10
   2  -4   6   91.19    3.10
   2  -4   6   85.99    2.50
  -3   4  -6   20.10    1.40
   3  -4   6   17.90    1.40
   3  -4   6   17.80    0.80
  -4   4  -6   15.40    1.30
   4  -4   6   15.50    1.40
   4  -4   6   16.40    0.80
  -5   4  -6    0.60    0.90
   5  -4   6    0.60    1.00
   5  -4   6    1.20    0.40
  -6   4  -6   81.69    3.20
   6  -4   6   81.39    2.60
   6  -4   6   83.29    3.50
  -7   4  -6   37.30    2.20
   7  -4   6   35.90    1.60
   7  -4   6   36.10    2.60
  -8   4  -6   15.90    1.90
   8  -4   6   16.90    1.40
   8  -4   6   18.50    2.10
  -9   4  -6   17.00    2.20
   9  -4   6   16.80    1.60
   9  -4   6   20.00    2.50
  11   3  -6   -0.20    1.20
  11   3  -6    1.00    1.60
 -11  -3   6    0.20    1.30
  10   3  -6   11.10    1.30
  10   3  -6   11.60    1.60
 -10  -3   6   12.90    1.60
   9   3  -6    3.70    1.30
   9   3  -6    2.20    0.80
  -9  -3   6    3.90    1.10
   8   3  -6   70.69    2.90
   8   3  -6   70.59    2.60
  -8  -3   6   70.59    2.90
  -8  -3   6   73.89    2.60
   7   3  -6    1.20    0.80
   7   3  -6    0.50    0.50
  -7  -3   6    1.20    0.60
  -7  -3   6    1.00    0.70
   6   3  -6    2.80    0.50
   6   3  -6    2.30    0.80
  -6  -3   6    2.50    0.50
  -6  -3   6    3.70    0.80
   5   3  -6   54.39    2.20
   5   3  -6   58.39    1.90
  -5  -3   6   60.49    2.20
  -5  -3   6   55.69    1.90
   4   3  -6    1.30    0.30
   4   3  -6    0.70    0.60
  -4  -3   6    1.30    0.40
  -4  -3   6    0.90    0.50
   3   3  -6   11.30    0.40
   3   3  -6   10.90    0.40
   3   3  -6   11.10    0.90
  -3  -3   6   10.60    0.90
  -3  -3   6   10.40    0.60
   2   3  -6   79.09    2.50
  -2  -3   6   82.09    2.40
  -2  -3   6   76.59    2.60
  -2  -3   6   74.99    2.20
   1   3  -6  189.18    5.20
   1   3  -6  180.28    5.30
  -1  -3   6  174.08    5.30
  -1  -3   6  179.98    4.90
  -1  -3   6  183.58    5.20
  -1  -3   6  182.68    4.90
   0   3  -6  204.48    5.90
   0   3  -6  212.08    5.80
   0  -3   6  204.58    5.50
   0  -3   6  205.68    5.50
   0  -3   6  199.28    5.90
   0  -3   6  205.48    5.90
  -1   3  -6    6.40    0.80
  -1   3  -6    7.40    0.80
  -1   3  -6    6.80    0.70
   1  -3   6    6.30    0.60
   1  -3   6    5.80    0.30
   1  -3   6    6.40    0.40
   1  -3   6    6.40    0.80
  -2   3  -6   77.39    2.70
  -2   3  -6   74.19    2.40
  -2   3  -6   70.79    2.60
   2  -3   6   70.59    2.60
   2  -3   6   72.59    2.10
   2  -3   6   69.49    2.30
   2  -3   6   75.59    2.10
  -3   3  -6    3.00    0.80
  -3   3  -6    3.30    0.70
   3  -3   6    4.00    0.40
   3  -3   6    3.00    0.60
   3  -3   6    4.10    0.80
  -4   3  -6   17.50    1.20
  -4   3  -6   18.30    1.40
   4  -3   6   15.70    0.70
   4  -3   6   13.60    1.60
   4  -3   6   14.70    1.30
  -5   3  -6   60.09    2.40
  -5   3  -6   60.09    2.60
   5  -3   6   55.39    2.50
   5  -3   6   59.29    1.90
  -6   3  -6   43.30    2.10
  -6   3  -6   43.60    2.30
   6  -3   6   42.10    1.60
   6  -3   6   44.80    2.30
  -7   3  -6   28.80    1.90
  -7   3  -6   30.00    2.10
   7  -3   6   27.00    1.30
   7  -3   6   28.80    2.00
  -8   3  -6   -0.60    1.20
   8  -3   6   -0.50    1.30
   8  -3   6   -0.10    0.60
  -9   3  -6   -0.40    1.30
   9  -3   6   -0.60    0.70
   9  -3   6    0.10    1.40
 -10   3  -6    5.00    2.20
  10  -3   6    8.30    1.90
  11   2  -6    3.40    1.40
  11   2  -6    3.60    1.60
 -11  -2   6    4.30    1.50
  10   2  -6   27.70    2.20
  10   2  -6   30.00    2.00
 -10  -2   6   32.20    2.20
   9   2  -6   15.30    1.50
   9   2  -6   13.10    1.60
  -9  -2   6   15.20    1.50
   8   2  -6    1.90    1.10
   8   2  -6    1.20    0.70
  -8  -2   6    1.00    0.70
  -8  -2   6    1.20    1.00
   7   2  -6   15.20    1.40
   7   2  -6   15.10    1.10
  -7  -2   6   15.60    1.30
  -7  -2   6   14.00    1.10
   6   2  -6   36.70    1.90
   6   2  -6   35.20    1.50
  -6  -2   6   34.70    1.70
  -6  -2   6   36.00    1.50
   5   2  -6   65.39    2.40
   5   2  -6   65.19    2.10
  -5  -2   6   64.69    2.10
  -5  -2   6   64.09    2.40
   4   2  -6  167.18    5.00
   4   2  -6  178.18    4.70
  -4  -2   6  163.38    5.00
  -4  -2   6  164.18    4.70
   3   2  -6    6.10    0.40
   3   2  -6    6.70    0.70
   3   2  -6    6.80    0.40
  -3  -2   6    4.10    0.60
  -3  -2   6    5.70    0.50
   2   2  -6  193.68    5.30
  -2  -2   6  190.38    5.00
  -2  -2   6  185.08    5.00
  -2  -2   6  173.08    5.30
  -2  -2   6  177.38    5.00
   1   2  -6  130.99    3.80
   1   2  -6  131.89    3.90
   1   2  -6  130.19    3.70
  -1  -2   6  127.49    3.50
  -1  -2   6  124.29    3.50
  -1  -2   6  129.39    3.70
  -1  -2   6  126.79    3.80
   0   2  -6    0.40    0.40
   0   2  -6    0.40    0.40
   0   2  -6    0.40    0.40
   0  -2   6    0.50    0.10
   0  -2   6    0.60    0.10
   0  -2   6    0.50    0.40
   0  -2   6    0.40    0.40
  -1   2  -6  114.79    3.50
  -1   2  -6  113.29    3.50
  -1   2  -6  116.49    3.40
   1  -2   6  109.09    3.50
  -2   2  -6    8.90    0.80
  -2   2  -6    8.20    0.70
  -2   2  -6    7.50    0.80
   2  -2   6    7.50    0.30
   2  -2   6    6.50    0.80
   2  -2   6    8.00    0.70
  -3   2  -6   43.80    1.80
  -3   2  -6   46.60    2.00
   3  -2   6   42.80    1.60
   3  -2   6   43.50    1.30
   3  -2   6   46.20    1.30
   3  -2   6   41.80    1.90
  -4   2  -6    0.30    0.60
  -4   2  -6    0.50    0.70
   4  -2   6    0.30    0.70
   4  -2   6    0.70    0.50
   4  -2   6    0.70    0.30
  -5   2  -6   56.09    2.40
  -5   2  -6   55.89    2.20
   5  -2   6   57.39    2.40
   5  -2   6   50.09    2.10
   5  -2   6   56.19    1.70
  -6   2  -6   17.40    1.40
  -6   2  -6   21.20    1.60
   6  -2   6   20.60    1.40
   6  -2   6   18.10    1.50
   6  -2   6   17.80    0.90
  -7   2  -6    9.60    1.40
  -7   2  -6    8.80    1.30
   7  -2   6    9.40    1.40
   7  -2   6    9.60    0.80
   7  -2   6    8.80    1.10
  -8   2  -6   69.49    3.00
  -8   2  -6   69.79    3.20
   8  -2   6   70.69    2.40
   8  -2   6   68.19    3.10
  -9   2  -6   14.30    1.80
  -9   2  -6   18.50    2.10
   9  -2   6   16.10    1.30
   9  -2   6   16.60    1.90
 -10   2  -6    4.80    1.80
 -10   2  -6    6.30    1.60
  10  -2   6    6.80    1.10
  10  -2   6    7.20    1.80
  11   1  -6   41.90    2.60
  11   1  -6   45.40    3.00
 -11  -1   6   42.20    2.80
  10   1  -6   34.30    2.40
  10   1  -6   34.90    2.20
 -10  -1   6   36.10    2.30
   9   1  -6    9.00    1.40
   9   1  -6   10.00    1.20
  -9  -1   6   10.20    1.40
   8   1  -6   21.30    1.70
   8   1  -6   19.90    1.50
  -8  -1   6   21.20    1.60
  -8  -1   6   20.30    1.40
   7   1  -6   43.20    2.20
   7   1  -6   42.10    1.80
  -7  -1   6   47.50    1.80
  -7  -1   6   46.40    2.10
   6   1  -6  212.88    6.20
   6   1  -6  217.88    6.50
  -6  -1   6  216.88    6.40
  -6  -1   6  215.98    6.10
   5   1  -6    1.50    0.50
   5   1  -6    2.10    0.70
  -5  -1   6    2.70    0.70
  -5  -1   6    1.30    0.40
   4   1  -6  182.28    5.40
   4   1  -6  181.18    5.10
  -4  -1   6  187.58    5.10
  -4  -1   6  180.98    5.30
   3   1  -6   92.29    2.90
   3   1  -6   87.19    2.50
   3   1  -6   91.89    2.60
  -3  -1   6   86.99    2.60
  -3  -1   6   86.89    2.80
   2   1  -6  172.98    5.00
   2   1  -6  179.68    4.70
  -2  -1   6  174.38    4.70
  -2  -1   6  167.48    4.90
  -2  -1   6  177.18    4.70
  -2  -1   6  161.48    4.70
   1   1  -6   44.70    1.40
   1   1  -6   40.10    1.50
  -1  -1   6   40.40    1.40
  -1  -1   6   39.30    1.20
  -1  -1   6   37.80    1.50
  -1  -1   6   40.20    1.20
   0   1  -6   80.39    2.50
   0   1  -6   81.39    2.50
   0   1  -6   79.59    2.50
   0  -1   6   77.09    2.50
   0  -1   6   76.69    2.10
   0  -1   6   81.49    2.10
  -1   1  -6  161.78    4.80
  -1   1  -6  169.18    4.80
  -1   1  -6  168.28    4.80
  -2   1  -6  122.19    3.70
  -2   1  -6  124.29    3.80
  -2   1  -6  126.09    3.70
   2  -1   6  122.09    3.70
  -3   1  -6    5.50    0.80
  -3   1  -6    5.50    0.60
  -3   1  -6    4.30    0.60
   3  -1   6    4.60    0.30
   3  -1   6    4.60    0.30
   3  -1   6    3.60    0.50
  -4   1  -6   31.30    1.40
  -4   1  -6   29.60    1.50
   4  -1   6   28.70    0.90
   4  -1   6   26.50    1.20
   4  -1   6   27.60    0.90
  -5   1  -6    8.70    1.20
  -5   1  -6    8.60    0.90
   5  -1   6    9.30    0.50
   5  -1   6    6.50    0.80
   5  -1   6    8.50    1.10
  -6   1  -6  126.19    4.40
  -6   1  -6  130.39    4.10
   6  -1   6  131.99    4.10
   6  -1   6  130.09    3.70
   6  -1   6  123.69    4.30
  -7   1  -6   19.20    1.60
  -7   1  -6   18.20    1.40
   7  -1   6   17.50    1.40
   7  -1   6   18.60    1.00
   7  -1   6   18.10    1.50
  -8   1  -6   24.10    1.70
  -8   1  -6   20.50    1.80
   8  -1   6   25.50    1.60
   8  -1   6   22.70    1.80
   8  -1   6   26.00    1.20
  -9   1  -6    3.40    1.20
  -9   1  -6    2.70    1.30
   9  -1   6    2.70    0.70
   9  -1   6    2.80    1.20
   9  -1   6    2.80    1.20
 -10   1  -6    7.70    1.70
 -10   1  -6    5.40    1.40
  10  -1   6    6.20    1.50
  10  -1   6    8.40    1.00
  10  -1   6    9.60    1.70
 -11   1  -6    0.00    1.90
 -11   1  -6   -0.50    1.40
  11  -1   6   -0.70    1.00
  11  -1   6   -0.70    1.70
  11   0  -6   25.30    2.70
  11   0  -6   24.20    2.50
 -11   0   6   26.50    2.50
  10   0  -6    2.40    1.50
  10   0  -6    4.60    1.20
 -10   0   6    4.80    1.60
   9   0  -6    0.90    0.90
   9   0  -6    1.40    1.30
  -9   0   6    0.70    1.00
   8   0  -6    0.80    1.00
   8   0  -6    1.10    0.80
  -8   0   6    1.40    0.90
   7   0  -6  121.69    3.90
   7   0  -6  117.29    4.20
  -7   0   6  126.99    4.10
  -7   0   6  117.79    3.80
   6   0  -6   32.70    1.70
   6   0  -6   32.30    1.50
  -6   0   6   32.30    1.40
  -6   0   6   29.50    1.60
   5   0  -6    6.60    0.90
   5   0  -6    6.10    0.70
  -5   0   6    6.20    0.60
  -5   0   6    4.90    0.70
   4   0  -6   72.49    2.30
   4   0  -6   75.79    2.60
  -4   0   6   75.29    2.30
  -4   0   6   73.49    2.50
   3   0  -6  133.69    3.80
   3   0  -6  132.89    4.20
   3   0  -6  145.99    3.80
  -3   0   6  131.19    4.00
  -3   0   6  134.19    3.80
   2   0  -6  148.79    4.00
   2   0  -6  147.69    4.40
   2   0  -6  153.28    4.00
   2   0  -6  154.18    4.00
  -2   0   6  145.39    4.10
  -2   0   6  145.79    4.30
  -2   0   6  143.19    4.10
   1   0  -6   38.30    1.50
   1   0  -6   37.80    1.30
  -1   0   6   37.30    1.20
  -1   0   6   35.20    1.30
  -1   0   6   35.50    1.10
   0   0  -6    0.10    0.40
   0   0  -6    0.10    0.30
   0   0   6    0.00    0.30
   0   0   6    0.20    0.10
   0   0   6    0.10    0.10
  -1   0  -6  470.75   12.60
  -1   0  -6  460.85   12.70
  -1   0  -6  478.45   12.60
   1   0   6  460.95   12.50
  -2   0  -6  208.98    5.80
  -2   0  -6  204.48    5.90
  -2   0  -6  208.08    5.90
  -3   0  -6  154.18    4.60
  -3   0  -6  153.68    4.70
  -3   0  -6  165.48    4.60
   3   0   6  161.08    4.20
   3   0   6  151.58    4.60
  -4   0  -6  449.86   12.60
  -4   0  -6  466.05   12.40
   4   0   6  450.35   12.40
   4   0   6  449.26   12.00
   4   0   6  466.05   12.00
  -5   0  -6    0.10    0.60
  -5   0  -6    0.10    0.50
   5   0   6    0.20    0.50
   5   0   6    0.20    0.20
  -6   0  -6  119.19    4.20
  -6   0  -6  127.69    3.90
   6   0   6  128.39    3.90
   6   0   6  118.49    3.50
  -7   0  -6  240.98    7.40
  -7   0  -6  246.38    7.20
   7   0   6  242.98    7.20
   7   0   6  248.58    6.80
  -8   0  -6  164.38    5.60
  -8   0  -6  164.98    5.30
   8   0   6  171.68    5.40
   8   0   6  175.18    4.90
   8   0   6  170.28    5.60
  -9   0  -6    1.00    0.90
  -9   0  -6    1.70    1.10
   9   0   6    1.30    1.00
   9   0   6    1.20    1.00
   9   0   6    1.20    0.60
 -10   0  -6   39.00    2.60
 -10   0  -6   41.20    2.50
[truncated: 233,986 more chars]
